# Supplementary material for: Gene by environment interaction mouse model reveals a functional role for 5-hydroxymethylcytosine in neurodevelopmental disorders
Source: HighWire-hosted journal article supplement (doi:10.1101/gr.276137.121), 2021-12-23
Supplement: Supplemental_Dataset_S1.xlsx [file Supplemental_Dataset_S1.xlsx]

## Sheet: Hippocampus PSWT vs ControlWT
Dataset 1: DhMRs and DhMR-associated genes
Hippocampus
PS WT vs Control WT
Chromosome	Region start	Region end	log fold change	P-value	FDR P-value	Genomic structure annotation	ENSEMBL ID	Gene Symbol	Gene Name	Developmental brain disorders-related genes	Stress-related genes	Direction of DhMR
Chr5	150607754	150608790	-0.751403	1.47229e-05	0.110013	Exon-(uc009aqt.1/uc009aqt.1,-exon-1-of-1)	ENSMUSG00000051950	B3glct	beta-3-glucosyltransferase			Hypo
Chr19	45544052	45545278	-0.720403	1.52198e-05	0.110013	Intron-(uc008hqx.2/12234,-intron-4-of-13)	ENSMUSG00000025217	Btrc	beta-transducin-repeat-containing-protein		yes	Hypo
Chr12	109741971	109743192	-0.621507	1.92847e-05	0.110013	Intron-(uc007ozp.1/68519,-intron-6-of-6)	ENSMUSG00000058070	Eml1	echinoderm-microtubule-associated-protein-like-1			Hypo
Chr6	144023856	144025096	0.74631	4.33001e-05	0.18526	Intron-(uc009eqk.2/20678,-intron-3-of-14)	ENSMUSG00000041540	Sox5	SRY-(sex-determining-region-Y)-box-5			Hyper
Chr8	128716831	128718527	0.569105	8.60671e-05	0.249541	Intron-(uc009nys.1/210027,-intron-1-of-5)	ENSMUSG00000057060	Slc35f3	solute-carrier-family-35,-member-F3			Hyper
Chr14	101662267	101663520	-0.908053	8.74865e-05	0.249541	Distal-Intergenic	NA	NA	NA			Hypo
Chr19	32879947	32881067	0.674388	0.00010902	0.266537	Promoter-(<=1kb)	ENSMUSG00000013663	Pten	phosphatase-and-tensin-homolog	yes	yes	Hyper
Chr1	166323272	166324361	0.882198	0.000131318	0.277213	Intron-(uc007dim.2/171567,-intron-13-of-14)	ENSMUSG00000026576	Atp1b1	ATPase,-Na+/K+-transporting,-beta-1-polypeptide		yes	Hyper
Chr11	35231862	35232930	-0.659488	0.000166504	0.277213	Intron-(uc007ild.2/20564,-intron-4-of-35)	ENSMUSG00000056427	Slit3	slit-guidance-ligand-3		yes	Hypo
Chr1	173188531	173189665	0.669462	0.000194354	0.277213	3'-UTR	ENSMUSG00000006403	Adamts4	a-disintegrin-like-and-metallopeptidase-(reprolysin-type)-with-thrombospondin-type-1-motif,-4		yes	Hyper
Chr15	80202131	80203584	-0.462278	0.000237542	0.277213	Exon-(uc009var.1/239556,-exon-17-of-37)	ENSMUSG00000022416	Cacna1i	calcium-channel,-voltage-dependent,-alpha-1I-subunit		yes	Hypo
Chr3	137525509	137526857	0.777635	0.000240033	0.277213	Promoter-(<=1kb)	ENSMUSG00000037894	H2afz	H2A-histone-family,-member-Z		yes	Hyper
Chr2	73957588	73958630	-0.702224	0.000265389	0.277213	Distal-Intergenic	NA	NA	NA			Hypo
Chr7	124676043	124677053	0.612985	0.000279363	0.277213	Intron-(uc009jjl.1/233781,-intron-2-of-6)	ENSMUSG00000030657	Xylt1	xylosyltransferase-1			Hyper
Chr2	5022532	5023913	0.607277	0.000301395	0.277213	Distal-Intergenic	NA	NA	NA			Hyper
Chr1	139551943	139553400	0.582889	0.000318651	0.277213	Distal-Intergenic	NA	NA	NA			Hyper
Chr7	103768223	103769231	-0.689527	0.000319431	0.277213	Intron-(uc009iio.1/23966,-intron-5-of-32)	ENSMUSG00000048078	Tenm4	teneurin-transmembrane-protein-4			Hypo
Chr14	66868328	66869711	-0.653364	0.000336946	0.277213	Intron-(uc007ujy.2/19229,-intron-1-of-29)	ENSMUSG00000059456	Ptk2b	PTK2-protein-tyrosine-kinase-2-beta		yes	Hypo
Chr1	9638421	9639710	-0.598066	0.000341022	0.277213	Distal-Intergenic	NA	NA	NA			Hypo
Chr4	43466902	43468027	0.74848	0.000360341	0.277213	Promoter-(<=1kb)	ENSMUSG00000028459	Cd72	CD72-antigen			Hyper
Chr8	113779782	113781044	0.65494	0.00036324	0.277213	Promoter-(2-3kb)	ENSMUSG00000003316	Glg1	golgi-apparatus-protein-1			Hyper
Chr15	8657638	8659668	-0.517249	0.000399164	0.277213	Promoter-(1-2kb)	ENSMUSG00000005360	Slc1a3	solute-carrier-family-1-(glial-high-affinity-glutamate-transporter),-member-3		yes	Hypo
Chr13	59291428	59292467	-0.745557	0.000408205	0.277213	Distal-Intergenic	NA	NA	NA			Hypo
Chr4	35350068	35351095	0.645016	0.000409188	0.277213	Distal-Intergenic	NA	NA	NA			Hyper
Chr4	49692656	49694577	0.583542	0.000420331	0.277213	Promoter-(<=1kb)	ENSMUSG00000028310	Ppp3r2	protein-phosphatase-3,-regulatory-subunit-B,-alpha-isoform-(calcineurin-B,-type-II)		yes	Hyper
Chr3	84178892	84179946	-0.747442	0.000421148	0.277213	Distal-Intergenic	NA	NA	NA			Hypo
Chr1	52558303	52559785	0.780334	0.00044718	0.277624	Promoter-(1-2kb)	ENSMUSG00000002881	Nab1	Ngfi-A-binding-protein-1			Hyper
Chr11	119083771	119085020	-0.533205	0.000478425	0.277624	Intron-(uc007mqa.2/207592,-intron-1-of-11)	ENSMUSG00000039976	Tbc1d16	TBC1-domain-family,-member-16			Hypo
Chr1	76768584	76769612	0.74194	0.000478967	0.277624	Distal-Intergenic	NA	NA	NA			Hyper
Chr2	57113712	57114811	0.646665	0.000511766	0.277624	Intron-(uc008jse.2/14571,-intron-1-of-16)	ENSMUSG00000026827	Gpd2	glycerol-phosphate-dehydrogenase-2,-mitochondrial			Hyper
Chr1	84414188	84415252	0.650625	0.000517874	0.277624	Exon-(uc007bsw.1/227325,-exon-9-of-13)	ENSMUSG00000045658	Pid1	phosphotyrosine-interaction-domain-containing-1		yes	Hyper
Chr11	95691903	95693110	-0.558172	0.000519105	0.277624	3'-UTR	ENSMUSG00000050860	Phospho1	phosphatase,-orphan-1			Hypo
Chr12	55769493	55770530	-0.695571	0.000559366	0.278019	Distal-Intergenic	NA	NA	NA			Hypo
Chr5	58441764	58442802	-0.818667	0.000573278	0.278019	Intron-(uc008xlu.2/54216,-intron-2-of-2)	ENSMUSG00000097216	4932441J04Rik	RIKEN-cDNA-4932441J04-gene			Hypo
Chr5	111178382	111179423	0.649422	0.000590291	0.278019	Intron-(uc008yrg.1/75560,-intron-2-of-51)	ENSMUSG00000029505	Ep400	E1A-binding-protein-p400	yes	yes	Hyper
Chr11	48651896	48653465	0.729511	0.000594146	0.278019	Promoter-(<=1kb)	ENSMUSG00000040350	Trim7	tripartite-motif-containing-7			Hyper
Chr10	57535214	57536366	-0.893275	0.000601068	0.278019	Distal-Intergenic	NA	NA	NA			Hypo
Chr14	68174574	68175733	0.713878	0.0006604	0.286374	Distal-Intergenic	NA	NA	NA			Hyper
Chr15	26569322	26570459	0.664944	0.000663965	0.286374	Intron-(uc007vjn.1/448987,-intron-2-of-3)	ENSMUSG00000043556	Fbxl7	F-box-and-leucine-rich-repeat-protein-7			Hyper
Chr1	134361348	134362359	0.68661	0.000669332	0.286374	3'-UTR	ENSMUSG00000042046	Dstyk	dual-serine/threonine-and-tyrosine-protein-kinase			Hyper
Chr14	69874427	69875449	-0.459645	0.000689863	0.287959	Intron-(uc007ume.1/67712,-intron-1-of-3)	ENSMUSG00000034248	Slc25a37	solute-carrier-family-25,-member-37			Hypo
Chr6	50994466	50995687	0.650648	0.00071375	0.290119	Distal-Intergenic	NA	NA	NA			Hyper
Chr2	172381138	172382139	-0.652234	0.000728943	0.290119	Exon-(uc008ocz.2/21420,-exon-6-of-7)	ENSMUSG00000028640	Tfap2c	transcription-factor-AP-2,-gamma			Hypo
Chr4	152443661	152445141	-0.541901	0.000792084	0.298462	Distal-Intergenic	NA	NA	NA			Hypo
Chr17	9902291	9904093	0.530501	0.000808697	0.298462	Distal-Intergenic	NA	NA	NA			Hyper
Chr9	108911836	108913293	0.444167	0.000818274	0.298462	Exon-(uc009rri.1/270198,-exon-8-of-14)	ENSMUSG00000025648	Pfkfb4	6-phosphofructo-2-kinase/fructose-2,6-biphosphatase-4			Hyper
Chr15	61642781	61643902	-0.61871	0.000831126	0.298462	Distal-Intergenic	NA	NA	NA			Hypo
Chr4	105773293	105774388	0.696974	0.000853235	0.298462	Distal-Intergenic	NA	NA	NA			Hyper
Chr17	5103821	5104930	0.505788	0.000854542	0.298462	Intron-(uc008aey.1/239985,-intron-3-of-19)	ENSMUSG00000069729	Arid1b	AT-rich-interactive-domain-1B-(SWI-like)	yes		Hyper
Chr16	85000383	85001398	0.675161	0.000925876	0.312695	Intron-(uc007ztm.2/11820,-intron-12-of-15)	ENSMUSG00000008976	Gabpa	GA-repeat-binding-protein,-alpha		yes	Hyper
Chr2	129944217	129945344	0.585193	0.000948789	0.312695	Distal-Intergenic	NA	NA	NA			Hyper
Chr5	101308252	101309447	0.910511	0.000965269	0.312695	Intron-(uc008yih.1/231510,-intron-3-of-12)	ENSMUSG00000029314	Gpat3	glycerol-3-phosphate-acyltransferase-3			Hyper
Chr4	141485485	141486660	-0.472352	0.000979053	0.312695	Promoter-(2-3kb)	ENSMUSG00000051435	Fhad1	forkhead-associated-(FHA)-phosphopeptide-binding-domain-1			Hypo
Chr2	34027916	34029036	0.604824	0.0010045	0.312695	3'-UTR	ENSMUSG00000038718	Pbx3	pre-B-cell-leukemia-homeobox-3			Hyper
Chr16	36880101	36881165	0.705673	0.00100492	0.312695	Exon-(uc007zdc.1/uc007zdc.1,-exon-1-of-1)	ENSMUSG00000034243	Golgb1	golgi-autoantigen,-golgin-subfamily-b,-macrogolgin-1			Hyper
Chr2	103752796	103754273	0.539683	0.00102796	0.314153	Distal-Intergenic	NA	NA	NA			Hyper
Chr5	8054694	8055880	0.613893	0.00105916	0.318008	Promoter-(<=1kb)	ENSMUSG00000003161	Sri	sorcin			Hyper
Chr3	9002605	9003848	0.539265	0.0010906	0.32121	Promoter-(<=1kb)	ENSMUSG00000027506	Tpd52	tumor-protein-D52			Hyper
Chr3	104151002	104152474	-0.605859	0.0011248	0.32121	Distal-Intergenic	NA	NA	NA			Hypo
Chr19	5665794	5666992	-0.524208	0.00112613	0.32121	Promoter-(2-3kb)	ENSMUSG00000056917	Sipa1	signal-induced-proliferation-associated-gene-1			Hypo
Chr10	117302845	117304543	-0.564021	0.00124979	0.339351	Distal-Intergenic	NA	NA	NA			Hypo
Chr14	34699702	34700875	0.4895	0.00127713	0.339351	Distal-Intergenic	NA	NA	NA			Hyper
Chr5	125671384	125672731	-0.543183	0.00128933	0.339351	Distal-Intergenic	NA	NA	NA			Hypo
Chr10	18174822	18175848	-0.565903	0.00129465	0.339351	Intron-(uc007emh.1/215819,-intron-1-of-3)	ENSMUSG00000039835	Nhsl1	NHS-like-1			Hypo
Chr3	148717468	148718619	-0.619471	0.00130971	0.339351	Distal-Intergenic	NA	NA	NA			Hypo
Chr15	12186572	12187656	-0.671888	0.00135204	0.339351	Exon-(uc007vhl.1/268783,-exon-9-of-16)	ENSMUSG00000039458	Mtmr12	myotubularin-related-protein-12	yes	yes	Hypo
Chr10	114864391	114865606	0.566306	0.00136279	0.339351	Promoter-(<=1kb)	ENSMUSG00000034163	Zfc3h1	zinc-finger,-C3H1-type-containing			Hyper
Chr6	125000432	125001572	-0.473591	0.00139422	0.339351	Promoter-(2-3kb)	ENSMUSG00000072770	Acrbp	proacrosin-binding-protein			Hypo
Chr5	112128461	112129545	-0.499641	0.00139734	0.339351	Distal-Intergenic	NA	NA	NA			Hypo
Chr3	65671143	65672716	-0.501697	0.00140596	0.339351	Intron-(uc008pkt.1/uc008pkt.1,-intron-2-of-3)	ENSMUSG00000027829	Ccnl1	cyclin-L1		yes	Hypo
Chr5	143633676	143634757	0.433317	0.00142726	0.339351	3'-UTR	ENSMUSG00000066640	Fbxl18	F-box-and-leucine-rich-repeat-protein-18			Hyper
Chr3	65647963	65649481	0.520159	0.00142768	0.339351	Intron-(uc008pkt.1/uc008pkt.1,-intron-2-of-3)	ENSMUSG00000027829	Ccnl1	cyclin-L1		yes	Hyper
Chr8	120967971	120969130	-0.544567	0.00146726	0.343982	Intron-(uc009nph.1/12554,-intron-1-of-3)	ENSMUSG00000031841	Cdh13	cadherin-13	yes	yes	Hypo
Chr1	39080310	39081329	0.542475	0.00156404	0.34527	Distal-Intergenic	NA	NA	NA			Hyper
Chr11	121585170	121586428	-0.699342	0.00156658	0.34527	Distal-Intergenic	NA	NA	NA			Hypo
Chr17	34370848	34372111	-0.643999	0.0015937	0.34527	Intron-(uc008cby.1/18132,-intron-1-of-4)	ENSMUSG00000041538	H2-Ob	histocompatibility-2,-O-region-beta-locus			Hypo
Chr2	132478008	132479298	0.612776	0.00160737	0.34527	Exon-(uc008mnd.2/767814,-exon-6-of-6)	ENSMUSG00000044991	1110034G24Rik	RIKEN-cDNA-1110034G24-gene			Hyper
Chr11	51672859	51674873	0.441229	0.00166287	0.34527	Promoter-(1-2kb)	ENSMUSG00000020387	Jade2	jade-family-PHD-finger-2			Hyper
Chr15	100766274	100767455	-0.429444	0.00167312	0.34527	Promoter-(<=1kb)	ENSMUSG00000023033	Scn8a	sodium-channel,-voltage-gated,-type-VIII,-alpha		yes	Hypo
Chr17	73004686	73006003	-0.582997	0.00168823	0.34527	Distal-Intergenic	NA	NA	NA			Hypo
Chr8	110142142	110143266	0.637326	0.00170673	0.34527	Distal-Intergenic	NA	NA	NA			Hyper
Chr2	165504868	165506289	0.592966	0.00171168	0.34527	Intron-(uc008nxw.1/14049,-intron-2-of-15)	ENSMUSG00000017897	Eya2	EYA-transcriptional-coactivator-and-phosphatase-2		yes	Hyper
Chr9	86466782	86467942	-0.58215	0.00171788	0.34527	Promoter-(1-2kb)	ENSMUSG00000032417	Rwdd2a	RWD-domain-containing-2A			Hypo
Chr9	58236291	58237313	0.661155	0.00171961	0.34527	Distal-Intergenic	NA	NA	NA			Hyper
Chr11	59565674	59566721	-0.659028	0.00173125	0.34527	Promoter-(<=1kb)	ENSMUSG00000005417	Mprip	myosin-phosphatase-Rho-interacting-protein		yes	Hypo
Chr5	3514970	3516061	-0.497605	0.00173503	0.34527	Exon-(uc008wgu.1/12571,-exon-6-of-8)	ENSMUSG00000058503	Fam133b	family-with-sequence-similarity-133,-member-B			Hypo
Chr6	4567285	4568794	-0.527382	0.00179258	0.352623	Intron-(uc009avo.1/213819,-intron-5-of-17)	ENSMUSG00000015189	Casd1	CAS1-domain-containing-1			Hypo
Chr2	166201919	166202935	0.589352	0.00184395	0.358606	Distal-Intergenic	NA	NA	NA			Hyper
Chr15	40545869	40547083	0.642668	0.00196885	0.359127	Intron-(uc007voq.1/22762,-intron-1-of-2)	ENSMUSG00000022306	Zfpm2	zinc-finger-protein,-multitype-2		yes	Hyper
Chr14	25364880	25365921	0.727518	0.00197432	0.359127	Distal-Intergenic	NA	NA	NA			Hyper
Chr9	116150111	116151224	0.647131	0.00197934	0.359127	Distal-Intergenic	NA	NA	NA			Hyper
Chr10	18812864	18813920	0.597293	0.00199282	0.359127	Distal-Intergenic	NA	NA	NA			Hyper
Chr1	160710977	160712161	-0.633651	0.00200527	0.359127	Intron-(uc007ddv.1/23850,-intron-16-of-21)	ENSMUSG00000073530	Pappa2	pappalysin-2			Hypo
Chr19	23426171	23427351	0.492973	0.00202767	0.359127	Intron-(uc008hac.1/71738,-intron-8-of-13)	ENSMUSG00000024943	Smc5	structural-maintenance-of-chromosomes-5			Hyper
Chr19	6336381	6337601	0.517437	0.00203445	0.359127	Promoter-(1-2kb)	ENSMUSG00000024947	Men1	multiple-endocrine-neoplasia-1		yes	Hyper
Chr9	62194737	62196436	0.398922	0.00204029	0.359127	Intron-(uc009qah.2/11737,-intron-1-of-6)	ENSMUSG00000032249	Anp32a	acidic-(leucine-rich)-nuclear-phosphoprotein-32-family,-member-A			Hyper
Chr13	100219047	100220175	-0.623262	0.00206864	0.359127	Intron-(uc007rpr.2/17755,-intron-2-of-6)	ENSMUSG00000052727	Map1b	microtubule-associated-protein-1B			Hypo
Chr10	40196989	40198168	0.499175	0.00209581	0.359127	Exon-(uc007ewt.2/78334,-exon-11-of-12)	ENSMUSG00000019834	Slc22a16	solute-carrier-family-22-(organic-cation-transporter),-member-16			Hyper
Chr9	41665133	41666293	-0.496477	0.00212313	0.359127	Distal-Intergenic	NA	NA	NA			Hypo
Chr8	111235643	111236735	-0.512818	0.00212868	0.359127	Promoter-(1-2kb)	ENSMUSG00000038872	Zfhx3	zinc-finger-homeobox-3		yes	Hypo
Chr3	51741291	51742906	0.431852	0.00221243	0.359127	Intron-(uc008pef.2/433586,-intron-1-of-4)	ENSMUSG00000061143	Maml3	mastermind-like-transcriptional-coactivator-3			Hyper
Chr9	56015719	56016814	-0.681031	0.00224372	0.359127	Distal-Intergenic	NA	NA	NA			Hypo
Chr4	109904012	109905327	0.492042	0.00228313	0.359127	Intron-(uc008ucw.1/15572,-intron-2-of-6)	ENSMUSG00000028546	Elavl4	ELAV-like-RNA-binding-protein-4			Hyper
Chr1	33388060	33389204	0.616323	0.00230216	0.359127	Distal-Intergenic	NA	NA	NA			Hyper
Chr4	154575188	154576857	-0.402426	0.00234354	0.359127	Intron-(uc008wcz.1/20481,-intron-1-of-6)	ENSMUSG00000029050	Ski	ski-sarcoma-viral-oncogene-homolog-(avian)			Hypo
Chr3	52776851	52778353	-0.438884	0.00235032	0.359127	Distal-Intergenic	NA	NA	NA			Hypo
Chr11	49073795	49074855	-0.482259	0.00235499	0.359127	5'-UTR	ENSMUSG00000020346	Mgat1	mannoside-acetylglucosaminyltransferase-1			Hypo
Chr19	3333330	3334428	-0.497848	0.00235738	0.359127	Intron-(uc008fwf.2/12894,-intron-1-of-18)	ENSMUSG00000024900	Cpt1a	carnitine-palmitoyltransferase-1a,-liver			Hypo
Chr15	31979561	31980627	0.496101	0.00236041	0.359127	Distal-Intergenic	NA	NA	NA			Hyper
Chr8	26907011	26908218	0.564915	0.00236515	0.359127	3'-UTR	ENSMUSG00000031574	Star	steroidogenic-acute-regulatory-protein		yes	Hyper
Chr6	72947595	72948608	0.633254	0.00236644	0.359127	Distal-Intergenic	NA	NA	NA			Hyper
Chr14	19149798	19151230	-0.47482	0.00237852	0.359127	Intron-(uc007shu.1/22194,-intron-3-of-5)	ENSMUSG00000021774	Ube2e1	ubiquitin-conjugating-enzyme-E2E-1		yes	Hypo
Chr10	34045082	34046301	0.725064	0.00242153	0.359127	Intron-(uc007euv.1/319638,-intron-6-of-11)	ENSMUSG00000039485	Tspyl4	TSPY-like-4			Hyper
Chr16	5595740	5596774	0.659059	0.00242192	0.359127	Distal-Intergenic	NA	NA	NA			Hyper
Chr7	123063530	123064936	0.497504	0.00248333	0.359127	Intron-(uc009jiq.1/20679,-intron-2-of-16)	ENSMUSG00000051910	Sox6	SRY-(sex-determining-region-Y)-box-6			Hyper
Chr11	17892019	17893210	0.689471	0.00249463	0.359127	Distal-Intergenic	NA	NA	NA			Hyper
Chr14	102318241	102319245	0.527148	0.00250194	0.359127	Exon-(uc007uvx.2/380928,-exon-24-of-31)	ENSMUSG00000033060	Lmo7	LIM-domain-only-7			Hyper
Chr17	87727928	87729480	-0.408286	0.00252403	0.359127	Exon-(uc008duu.1/225049,-exon-9-of-19)	ENSMUSG00000036918	Ttc7	tetratricopeptide-repeat-domain-7			Hypo
Chr18	67018332	67019732	-0.54809	0.00254454	0.359127	Promoter-(<=1kb)	ENSMUSG00000047259	Mc4r	melanocortin-4-receptor			Hypo
Chr2	174715127	174716405	0.49014	0.00255228	0.359127	Distal-Intergenic	NA	NA	NA			Hyper
Chr7	108177303	108178682	-0.449866	0.00255812	0.359127	Distal-Intergenic	NA	NA	NA			Hypo
Chr18	68106252	68107407	-0.592313	0.00259034	0.359127	Intron-(uc008fng.1/52662,-intron-1-of-5)	ENSMUSG00000024544	Ldlrad4	low-density-lipoprotein-receptor-class-A-domain-containing-4			Hypo
Chr19	29331138	29332236	0.63354	0.00262386	0.359127	Intron-(uc008hdb.1/16452,-intron-2-of-24)	ENSMUSG00000024789	Jak2	Janus-kinase-2		yes	Hyper
Chr17	66152104	66153382	0.535686	0.0026265	0.359127	Exon-(uc008dgj.2/70351,-exon-3-of-20)	ENSMUSG00000061950	Ppp4r1	protein-phosphatase-4,-regulatory-subunit-1		yes	Hyper
Chr9	72937165	72938226	0.58917	0.00265559	0.359127	Intron-(uc009qqv.1/11891,-intron-5-of-5)	ENSMUSG00000032202	Rab27a	RAB27A,-member-RAS-oncogene-family		yes	Hyper
Chr13	42990191	42991454	0.495012	0.00266117	0.359127	Intron-(uc007qfm.1/218194,-intron-3-of-3)	ENSMUSG00000054728	Phactr1	phosphatase-and-actin-regulator-1		yes	Hyper
Chr4	46112911	46114152	-0.493282	0.00266502	0.359127	Intron-(uc008ste.1/21916,-intron-8-of-9)	ENSMUSG00000028328	Tmod1	tropomodulin-1			Hypo
Chr7	126888086	126889121	0.676185	0.00274357	0.362298	Distal-Intergenic	NA	NA	NA			Hyper
Chr18	57288974	57290493	0.507564	0.00274668	0.362298	Promoter-(2-3kb)	ENSMUSG00000024593	Megf10	multiple-EGF-like-domains-10		yes	Hyper
Chr13	102476799	102478453	-0.39546	0.00275425	0.362298	Intron-(uc007rrt.1/18708,-intron-4-of-15)	ENSMUSG00000041417	Pik3r1	phosphoinositide-3-kinase-regulatory-subunit-1		yes	Hypo
Chr14	30206482	30207516	-0.637356	0.00279592	0.362298	Intron-(uc007sui.1/12294,-intron-5-of-37)	ENSMUSG00000021991	Cacna2d3	calcium-channel,-voltage-dependent,-alpha2/delta-subunit-3	yes	yes	Hypo
Chr2	124544541	124545613	0.517773	0.00280825	0.362298	Distal-Intergenic	NA	NA	NA			Hyper
Chr17	67449276	67450613	0.471395	0.00282745	0.362298	Intron-(uc008dka.2/19274,-intron-2-of-30)	ENSMUSG00000033278	Ptprm	protein-tyrosine-phosphatase,-receptor-type,-M	yes	yes	Hyper
Chr9	105289581	105291375	0.482869	0.00283883	0.362298	Intron-(uc009rhy.2/208583,-intron-2-of-15)	ENSMUSG00000035032	Nek11	NIMA-(never-in-mitosis-gene-a)-related-expressed-kinase-11		yes	Hyper
Chr5	45157359	45158645	0.484824	0.00285791	0.362298	Intron-(uc008xis.1/16826,-intron-1-of-8)	ENSMUSG00000039706	Ldb2	LIM-domain-binding-2		yes	Hyper
Chr17	64732298	64733989	-0.545542	0.00289992	0.36345	Distal-Intergenic	NA	NA	NA			Hypo
Chr1	128278972	128280528	0.505672	0.00290947	0.36345	Promoter-(<=1kb)	ENSMUSG00000049690	Nckap5	NCK-associated-protein-5	yes	yes	Hyper
Chr8	124823158	124824301	-0.417819	0.0029354	0.364032	Intron-(uc009nsj.1/22761,-intron-1-of-9)	ENSMUSG00000049577	Zfpm1	zinc-finger-protein,-multitype-1			Hypo
Chr9	121265939	121267622	-0.379306	0.00297372	0.365674	Intron-(uc009sda.1/67095,-intron-1-of-11)	ENSMUSG00000032536	Trak1	trafficking-protein,-kinesin-binding-1		yes	Hypo
Chr11	51142876	51144457	-0.526447	0.00299137	0.365674	Intron-(uc007itv.2/237759,-intron-2-of-27)	ENSMUSG00000063564	Col23a1	collagen,-type-XXIII,-alpha-1			Hypo
Chr2	179696736	179697932	0.461231	0.0030502	0.370221	Intron-(uc008ohw.1/228980,-intron-1-of-14)	ENSMUSG00000039117	Taf4	TATA-box-binding-protein-associated-factor-4			Hyper
Chr1	187029635	187030744	-0.485477	0.00314588	0.374373	Promoter-(1-2kb)	ENSMUSG00000039318	Rab3gap2	RAB3-GTPase-activating-protein-subunit-2			Hypo
Chr9	102854228	102855257	0.727055	0.0031619	0.374373	Distal-Intergenic	NA	NA	NA			Hyper
Chr11	51124393	51126157	-0.512775	0.00317817	0.374373	Intron-(uc007itv.2/237759,-intron-1-of-27)	ENSMUSG00000063564	Col23a1	collagen,-type-XXIII,-alpha-1			Hypo
Chr5	122828113	122829763	-0.465718	0.00319254	0.374373	Exon-(uc008zle.1/68080,-exon-3-of-8)	ENSMUSG00000029464	Gpn3	GPN-loop-GTPase-3			Hypo
Chr10	75062625	75064070	-0.582624	0.00320622	0.374373	Intron-(uc007fqq.1/23887,-intron-1-of-11)	ENSMUSG00000006344	Ggt5	gamma-glutamyltransferase-5			Hypo
Chr3	55250498	55251580	0.515977	0.00321987	0.374373	Intron-(uc008pgk.2/13175,-intron-4-of-6)	ENSMUSG00000027797	Dclk1	doublecortin-like-kinase-1		yes	Hyper
Chr4	134747629	134748635	0.584913	0.00327049	0.374373	Distal-Intergenic	NA	NA	NA			Hyper
Chr18	73595311	73596327	0.589876	0.00332136	0.374373	Distal-Intergenic	NA	NA	NA			Hyper
Chr6	117740089	117741840	0.516146	0.00338794	0.374373	Distal-Intergenic	NA	NA	NA			Hyper
Chr4	154716642	154717779	-0.545013	0.00343571	0.374373	Promoter-(2-3kb)	ENSMUSG00000029053	Prkcz	protein-kinase-C,-zeta		yes	Hypo
Chr8	55562254	55563269	-0.560879	0.00348887	0.374373	Distal-Intergenic	NA	NA	NA			Hypo
Chr14	118122518	118123641	-0.536278	0.00349574	0.374373	Intron-(uc007uyk.1/23888,-intron-4-of-9)	ENSMUSG00000022129	Dct	dopachrome-tautomerase		yes	Hypo
Chr19	55637206	55638337	-0.394147	0.00350524	0.374373	Intron-(uc008hxx.1/53611,-intron-7-of-7)	ENSMUSG00000024985	Tcf7l2	transcription-factor-7-like-2,-T-cell-specific,-HMG-box	yes	yes	Hypo
Chr1	128812218	128813504	0.500429	0.00353233	0.374373	Distal-Intergenic	NA	NA	NA			Hyper
Chr14	100359525	100360744	0.536591	0.00356534	0.374373	Intron-(uc007uvh.1/16597,-intron-4-of-6)	ENSMUSG00000072294	Klf12	Kruppel-like-factor-12		yes	Hyper
Chr14	51545646	51546796	0.531244	0.00357422	0.374373	Promoter-(<=1kb)	ENSMUSG00000035960	Apex1	apurinic/apyrimidinic-endonuclease-1			Hyper
Chr5	143068434	143069677	-0.533694	0.00359711	0.374373	Intron-(uc009aix.1/75104,-intron-1-of-6)	ENSMUSG00000039533	Mmd2	monocyte-to-macrophage-differentiation-associated-2			Hypo
Chr1	185963780	185965259	0.591582	0.00359835	0.374373	Distal-Intergenic	NA	NA	NA			Hyper
Chr7	74500046	74501418	0.484394	0.00360206	0.374373	Intron-(uc009hif.1/17258,-intron-1-of-11)	ENSMUSG00000030557	Mef2a	myocyte-enhancer-factor-2A		yes	Hyper
Chr18	50137436	50138628	-0.624805	0.00363072	0.374373	Promoter-(<=1kb)	ENSMUSG00000062210	Tnfaip8	tumor-necrosis-factor,-alpha-induced-protein-8			Hypo
Chr2	158083315	158084373	-0.460659	0.00369517	0.374373	Promoter-(<=1kb)	ENSMUSG00000052922	Bpi	bactericidal-permeablility-increasing-protein		yes	Hypo
Chr14	28552782	28553810	0.609843	0.00372838	0.374373	Intron-(uc007sty.1/238988,-intron-3-of-7)	ENSMUSG00000040640	Erc2	ELKS/RAB6-interacting/CAST-family-member-2		yes	Hyper
Chr4	127682551	127684079	-0.501904	0.00375117	0.374373	Intron-(uc008uuy.1/uc008uuy.1,-intron-1-of-12)	ENSMUSG00000028813	CK137956	cDNA-sequence-CK137956			Hypo
Chr1	183832615	183834423	0.420515	0.00378801	0.374373	Downstream-(<1kb)	ENSMUSG00000004880	Lbr	lamin-B-receptor		yes	Hyper
Chr4	40106041	40107357	-0.465686	0.00379254	0.374373	Intron-(uc008shd.1/11428,-intron-1-of-20)	ENSMUSG00000028405	Aco1	aconitase-1		yes	Hypo
Chr12	106105279	106106510	-0.488238	0.00379414	0.374373	Promoter-(1-2kb)	ENSMUSG00000021097	Clmn	calmin			Hypo
Chr1	181970088	181971108	0.62535	0.00381809	0.374373	Exon-(uc007dvs.2/226751,-exon-6-of-15)	ENSMUSG00000026490	Cdc42bpa	CDC42-binding-protein-kinase-alpha			Hyper
Chr9	119089230	119090325	-0.48233	0.00383889	0.374373	Exon-(uc009sak.1/382113,-exon-3-of-12)	ENSMUSG00000070280	Slc22a14	solute-carrier-family-22-(organic-cation-transporter),-member-14			Hypo
Chr7	87990453	87991722	-0.576424	0.00384153	0.374373	Distal-Intergenic	NA	NA	NA			Hypo
Chr18	54155255	54156363	0.469902	0.00385609	0.374373	Distal-Intergenic	NA	NA	NA			Hyper
Chr15	64059791	64060860	-0.49945	0.00387484	0.374373	Intron-(uc007vzh.1/13196,-intron-1-of-28)	ENSMUSG00000022377	Asap1	ArfGAP-with-SH3-domain,-ankyrin-repeat-and-PH-domain1			Hypo
Chr5	112554038	112555175	-0.589055	0.00387871	0.374373	Distal-Intergenic	NA	NA	NA			Hypo
Chr15	86255060	86256133	0.48875	0.0039022	0.374373	Intron-(uc007xea.1/223754,-intron-11-of-12)	ENSMUSG00000051864	Tbc1d22a	TBC1-domain-family,-member-22a			Hyper
Chr5	74304055	74305110	0.553112	0.00392087	0.374373	Distal-Intergenic	NA	NA	NA			Hyper
Chr2	158990235	158991320	0.488346	0.00392209	0.374373	Distal-Intergenic	NA	NA	NA			Hyper
Chr6	113047412	113048487	-0.639312	0.00394291	0.374373	Intron-(uc009dep.1/72895,-intron-1-of-15)	ENSMUSG00000034269	Setd5	SET-domain-containing-5	yes		Hypo
Chr8	28182680	28183878	0.632719	0.00395158	0.374373	Distal-Intergenic	NA	NA	NA			Hyper
Chr9	116162171	116163441	-0.462446	0.00396693	0.374373	Distal-Intergenic	NA	NA	NA			Hypo
Chr12	17553917	17555175	-0.434426	0.00399591	0.374373	Promoter-(2-3kb)	ENSMUSG00000011179	Odc1	ornithine-decarboxylase,-structural-1		yes	Hypo
Chr7	106762212	106763820	-0.566207	0.00401832	0.374373	Distal-Intergenic	NA	NA	NA			Hypo
Chr19	34894150	34895186	0.559702	0.00408454	0.374373	Promoter-(<=1kb)	ENSMUSG00000065594	Mir107	microRNA-107			Hyper
Chr13	115167046	115168152	0.620769	0.00411711	0.374373	Intron-(uc007rxm.2/17993,-intron-1-of-4)	ENSMUSG00000021764	Ndufs4	NADH-dehydrogenase-(ubiquinone)-Fe-S-protein-4		yes	Hyper
Chr16	55911086	55912206	0.566226	0.00412484	0.374373	Exon-(uc007zlr.2/74201,-exon-10-of-11)	ENSMUSG00000075033	Nxpe3	neurexophilin-and-PC-esterase-domain-family,-member-3			Hyper
Chr14	103618344	103619685	-0.471538	0.00412837	0.374373	Exon-(uc007uwl.1/105689,-exon-33-of-85)	ENSMUSG00000033004	Mycbp2	MYC-binding-protein-2			Hypo
Chr2	72875562	72876712	-0.532559	0.00413731	0.374373	Distal-Intergenic	NA	NA	NA			Hypo
Chr8	13198297	13199466	-0.572075	0.00419086	0.374373	Promoter-(1-2kb)	ENSMUSG00000038515	Grtp1	GH-regulated-TBC-protein-1			Hypo
Chr10	79219151	79220300	0.45259	0.0042119	0.374373	Promoter-(1-2kb)	ENSMUSG00000020327	Fgf22	fibroblast-growth-factor-22			Hyper
Chr7	52473136	52474948	0.46703	0.00422332	0.374373	Promoter-(<=1kb)	ENSMUSG00000030796	Tead2	TEA-domain-family-member-2			Hyper
Chr4	84406103	84407584	0.495201	0.00424015	0.374373	Distal-Intergenic	NA	NA	NA			Hyper
Chr10	79756339	79757672	-0.490154	0.00424363	0.374373	Promoter-(1-2kb)	ENSMUSG00000063457	Rps15	ribosomal-protein-S15			Hypo
Chr17	6988087	6989322	0.466895	0.00426427	0.374373	Promoter-(<=1kb)	ENSMUSG00000052397	Ezr	ezrin		yes	Hyper
Chr18	82857757	82858781	0.486704	0.00427842	0.374373	Intron-(uc008fub.2/329002,-intron-1-of-29)	ENSMUSG00000041258	Zfp236	zinc-finger-protein-236			Hyper
Chr2	180232225	180233243	-0.485294	0.0043012	0.374373	Promoter-(1-2kb)	ENSMUSG00000027568	Ntsr1	neurotensin-receptor-1		yes	Hypo
Chr14	57724281	57725843	-0.414241	0.00431348	0.374373	Promoter-(<=1kb)	ENSMUSG00000046352	Gjb2	gap-junction-protein,-beta-2		yes	Hypo
Chr10	94639214	94640478	0.418341	0.00432466	0.374373	Intron-(uc007gwa.1/12905,-intron-1-of-1)	ENSMUSG00000045867	Cradd	CASP2-and-RIPK1-domain-containing-adaptor-with-death-domain		yes	Hyper
Chr9	67022833	67023875	0.564063	0.00434798	0.374373	Distal-Intergenic	NA	NA	NA			Hyper
Chr1	55260227	55261648	-0.485401	0.0043633	0.374373	Promoter-(<=1kb)	ENSMUSG00000025978	Rftn2	raftlin-family-member-2			Hypo
Chr10	67716515	67717609	-0.550813	0.00444016	0.374373	Intron-(uc007fmh.1/71371,-intron-2-of-9)	ENSMUSG00000019947	Arid5b	AT-rich-interactive-domain-5B-(MRF1-like)			Hypo
Chr7	52756245	52757485	0.484089	0.00446233	0.374373	Exon-(uc009gvm.2/18220,-exon-4-of-13)	ENSMUSG00000030824	Nucb1	nucleobindin-1			Hyper
Chr14	68073761	68074963	-0.639328	0.00447295	0.374373	Distal-Intergenic	NA	NA	NA			Hypo
Chr3	105392925	105394236	0.396139	0.00448612	0.374373	Intron-(uc008qux.1/56543,-intron-2-of-4)	ENSMUSG00000027905	Ddx20	DEAD-(Asp-Glu-Ala-Asp)-box-polypeptide-20			Hyper
Chr14	122167413	122168496	-0.435403	0.00449622	0.374373	Intron-(uc011zqi.1/105445,-intron-1-of-52)	ENSMUSG00000025558	Dock9	dedicator-of-cytokinesis-9		yes	Hypo
Chr5	27386008	27387856	0.573368	0.00453372	0.374373	Intron-(uc008wtj.1/13483,-intron-1-of-3)	ENSMUSG00000061576	Dpp6	dipeptidylpeptidase-6	yes		Hyper
Chr16	13478655	13479827	0.515083	0.00463922	0.374373	Distal-Intergenic	NA	NA	NA			Hyper
Chr13	34152617	34155076	0.391111	0.00468862	0.374373	3'-UTR	ENSMUSG00000058672	Tubb2a	tubulin,-beta-2A-class-IIA		yes	Hyper
Chr14	25720002	25721044	0.526445	0.00475082	0.374373	Distal-Intergenic	NA	NA	NA			Hyper
Chr11	79615907	79616930	-0.431729	0.00475728	0.374373	Distal-Intergenic	NA	NA	NA			Hypo
Chr12	4832588	4833591	0.68783	0.0047612	0.374373	Exon-(uc007myi.1/66055,-exon-3-of-4)	ENSMUSG00000037361	Sf3b6	splicing-factor-3B,-subunit-6			Hyper
Chr5	136166025	136167490	-0.450285	0.00478139	0.374373	Promoter-(<=1kb)	ENSMUSG00000005514	Por	P450-(cytochrome)-oxidoreductase		yes	Hypo
Chr3	40751876	40752956	0.608906	0.00479002	0.374373	Promoter-(1-2kb)	ENSMUSG00000025762	Larp1b	La-ribonucleoprotein-domain-family,-member-1B			Hyper
Chr14	61854911	61855945	-0.636787	0.00479323	0.374373	Exon-(uc007ufs.1/24053,-exon-4-of-8)	ENSMUSG00000035296	Sgcg	sarcoglycan,-gamma-(dystrophin-associated-glycoprotein)		yes	Hypo
Chr8	108218785	108219951	-0.502883	0.00480183	0.374373	Exon-(uc009ndo.1/234695,-exon-10-of-17)	ENSMUSG00000038000	Acd	adrenocortical-dysplasia			Hypo
Chr11	52131587	52132597	-0.505649	0.00482364	0.374373	Distal-Intergenic	NA	NA	NA			Hypo
Chr11	70132518	70133839	0.559595	0.00485402	0.374373	Promoter-(2-3kb)	ENSMUSG00000018907	Alox12e	arachidonate-lipoxygenase,-epidermal			Hyper
Chr13	55609527	55610608	-0.373217	0.00486822	0.374373	5'-UTR	ENSMUSG00000021493	Pdlim7	PDZ-and-LIM-domain-7		yes	Hypo
Chr1	130367585	130368724	-0.628255	0.00489293	0.374373	Distal-Intergenic	NA	NA	NA			Hypo
Chr1	80287204	80288207	0.521207	0.00490992	0.374373	Intron-(uc007brc.1/26554,-intron-3-of-15)	ENSMUSG00000004364	Cul3	cullin-3	yes	yes	Hyper
Chr5	112978599	112979621	-0.506557	0.00491501	0.374373	Intron-(uc008ytk.1/56747,-intron-1-of-16)	ENSMUSG00000058153	Sez6l	seizure-related-6-homolog-like		yes	Hypo
Chr1	161348262	161349671	-0.504167	0.00491892	0.374373	Distal-Intergenic	NA	NA	NA			Hypo
Chr7	19662993	19664021	-0.525088	0.00492371	0.374373	Promoter-(<=1kb)	ENSMUSG00000030410	Dmwd	dystrophia-myotonica-containing-WD-repeat-motif			Hypo
Chr2	162299572	162300577	-0.579903	0.00498537	0.374373	Intron-(uc008nrw.1/19281,-intron-1-of-29)	ENSMUSG00000053141	Ptprt	protein-tyrosine-phosphatase,-receptor-type,-T			Hypo
Chr1	188412380	188413528	-0.498256	0.00499947	0.374373	Distal-Intergenic	NA	NA	NA			Hypo
Chr10	72250935	72252277	-0.797613	0.00501663	0.374373	Distal-Intergenic	NA	NA	NA			Hypo
Chr8	70975067	70976239	-0.644326	0.00503205	0.374373	Intron-(uc009lwf.2/234356,-intron-4-of-9)	ENSMUSG00000053886	Sh2d4a	SH2-domain-containing-4A			Hypo
Chr4	33885219	33886258	0.514078	0.00504544	0.374373	Distal-Intergenic	NA	NA	NA			Hyper
Chr4	116901764	116902793	-0.531409	0.00505569	0.374373	Exon-(uc008uig.2/381544,-exon-6-of-13)	ENSMUSG00000060268	Gm1661	predicted-gene-1661			Hypo
Chr17	67292808	67293902	0.498911	0.00507865	0.374373	Promoter-(<=1kb)	ENSMUSG00000033278	Ptprm	protein-tyrosine-phosphatase,-receptor-type,-M	yes	yes	Hyper
Chr10	95057829	95058862	0.514805	0.00508502	0.374373	Distal-Intergenic	NA	NA	NA			Hyper
Chr7	37221772	37222791	-0.562035	0.00509006	0.374373	Distal-Intergenic	NA	NA	NA			Hypo
Chr13	23597868	23599614	0.450157	0.00509779	0.374373	Distal-Intergenic	NA	NA	NA			Hyper
Chr14	118963591	118964833	-0.434677	0.00516215	0.374373	Intron-(uc011zpz.1/239273,-intron-19-of-30)	ENSMUSG00000032849	Abcc4	ATP-binding-cassette,-sub-family-C-(CFTR/MRP),-member-4		yes	Hypo
Chr14	25919272	25920347	-0.488842	0.00516976	0.374373	Distal-Intergenic	NA	NA	NA			Hypo
Chr11	70279702	70280833	0.549729	0.0051759	0.374373	Distal-Intergenic	NA	NA	NA			Hyper
Chr18	85026452	85027973	0.381164	0.00517772	0.374373	Intron-(uc008fuw.1/109672,-intron-1-of-4)	ENSMUSG00000024646	Cyb5a	cytochrome-b5-type-A-(microsomal)			Hyper
Chr1	181173171	181174194	-0.441357	0.0052409	0.374373	Intron-(uc007dvj.1/69726,-intron-5-of-11)	ENSMUSG00000055067	Smyd3	SET-and-MYND-domain-containing-3			Hypo
Chr5	99183454	99185063	-0.494317	0.00525332	0.374373	Intron-(uc008yge.1/75784,-intron-4-of-5)	ENSMUSG00000029335	Bmp3	bone-morphogenetic-protein-3			Hypo
Chr11	31271169	31272271	0.613162	0.00526437	0.374373	Promoter-(1-2kb)	ENSMUSG00000020303	Stc2	stanniocalcin-2		yes	Hyper
Chr2	73266505	73267580	0.450781	0.00527344	0.374373	Downstream-(<1kb)	ENSMUSG00000075284	Wipf1	WAS/WASL-interacting-protein-family,-member-1		yes	Hyper
Chr8	36405271	36406321	0.588181	0.00527462	0.374373	Distal-Intergenic	NA	NA	NA			Hyper
Chr8	48493807	48495804	-0.420707	0.00529316	0.374373	Distal-Intergenic	NA	NA	NA			Hypo
Chr14	61659531	61660691	0.465719	0.00531563	0.374373	Promoter-(2-3kb)	ENSMUSG00000060548	Tnfrsf19	tumor-necrosis-factor-receptor-superfamily,-member-19			Hyper
Chr3	97938630	97940472	-0.382124	0.00532791	0.374373	Exon-(uc008qpo.1/18129,-exon-25-of-34)	ENSMUSG00000043468	Adam30	a-disintegrin-and-metallopeptidase-domain-30			Hypo
Chr17	10345702	10346764	-0.538963	0.0053513	0.374373	Distal-Intergenic	NA	NA	NA			Hypo
Chr15	6618303	6619865	-0.545685	0.00536833	0.374373	Distal-Intergenic	NA	NA	NA			Hypo
Chr5	147925612	147926694	0.627549	0.00539963	0.374373	Distal-Intergenic	NA	NA	NA			Hyper
Chr9	116053343	116054744	0.428722	0.00540319	0.374373	Intron-(uc009rys.2/21813,-intron-2-of-7)	ENSMUSG00000032440	Tgfbr2	transforming-growth-factor,-beta-receptor-II		yes	Hyper
Chr6	88464839	88466720	0.394775	0.0054528	0.375469	Promoter-(<=1kb)	ENSMUSG00000030082	Sec61a1	Sec61-alpha-1-subunit-(S.-cerevisiae)		yes	Hyper
Chr3	28374289	28375432	0.586983	0.00546288	0.375469	Intron-(uc008otx.2/665113,-intron-2-of-30)	ENSMUSG00000027692	Tnik	TRAF2-and-NCK-interacting-kinase		yes	Hyper
Chr9	57280237	57281246	0.435672	0.00550323	0.375712	Intron-(uc009put.1/66812,-intron-3-of-6)	ENSMUSG00000063849	Ppcdc	phosphopantothenoylcysteine-decarboxylase			Hyper
Chr3	123164600	123165965	0.532551	0.00551033	0.375712	Intron-(uc008rfl.2/19142,-intron-1-of-10)	ENSMUSG00000027978	Prss12	protease,-serine-12-neurotrypsin-(motopsin)			Hyper
Chr13	113069423	113070541	-0.585014	0.00553378	0.375814	Distal-Intergenic	NA	NA	NA			Hypo
Chr9	56304235	56305497	0.535073	0.00559231	0.378233	Intron-(uc009ptb.1/66867,-intron-1-of-2)	ENSMUSG00000032329	Hmg20a	high-mobility-group-20A			Hyper
Chr5	114364280	114365300	-0.502689	0.00563318	0.378233	Distal-Intergenic	NA	NA	NA			Hypo
Chr13	62968728	62969853	0.568749	0.0056357	0.378233	Exon-(uc007qxg.1/14121,-exon-6-of-7)	ENSMUSG00000021456	Fbp2	fructose-bisphosphatase-2		yes	Hyper
Chr1	153605094	153606101	0.644828	0.00568704	0.379608	Promoter-(2-3kb)	ENSMUSG00000043019	Edem3	ER-degradation-enhancer,-mannosidase-alpha-like-3		yes	Hyper
Chr10	41567130	41568380	-0.547968	0.00571695	0.379608	Intron-(uc007eye.2/140742,-intron-1-of-9)	ENSMUSG00000038332	Sesn1	sestrin-1		yes	Hypo
Chr10	42012986	42014067	0.493411	0.00573024	0.379608	Distal-Intergenic	NA	NA	NA			Hyper
Chr9	119355308	119356752	-0.416803	0.00576566	0.379608	Promoter-(1-2kb)	ENSMUSG00000042787	Exog	endo/exonuclease-(5'-3'),-endonuclease-G-like			Hypo
Chr4	9370388	9371926	0.42648	0.0057809	0.379608	Intron-(uc008rye.2/74438,-intron-5-of-5)	ENSMUSG00000041216	Clvs1	clavesin-1			Hyper
Chr12	117441719	117442819	-0.528064	0.00581268	0.379608	Downstream-(2-3kb)	ENSMUSG00000042050	Wdr60	WD-repeat-domain-60			Hypo
Chr5	37220393	37221447	0.540053	0.0058765	0.379608	Promoter-(<=1kb)	ENSMUSG00000029119	Man2b2	mannosidase-2,-alpha-B2			Hyper
Chr2	93455658	93456674	0.402428	0.00589243	0.379608	Distal-Intergenic	NA	NA	NA			Hyper
Chr3	99014166	99015211	-0.594034	0.00590147	0.379608	Intron-(uc008qqk.1/70560,-intron-4-of-5)	ENSMUSG00000027868	Tbx15	T-box-15			Hypo
Chr8	81557318	81558373	0.452644	0.00593413	0.379608	Intron-(uc009mig.1/622675,-intron-1-of-2)	ENSMUSG00000071064	Zfp827	zinc-finger-protein-827			Hyper
Chr3	95088236	95090229	0.413193	0.00593461	0.379608	Promoter-(1-2kb)	ENSMUSG00000038712	Mindy1	MINDY-lysine-48-deubiquitinase-1			Hyper
Chr10	67413236	67414236	0.508886	0.00594408	0.379608	Distal-Intergenic	NA	NA	NA			Hyper
Chr12	83720146	83721561	-0.505101	0.00594454	0.379608	Promoter-(1-2kb)	ENSMUSG00000021219	Rgs6	regulator-of-G-protein-signaling-6		yes	Hypo
Chr4	151799549	151800758	0.420497	0.00597086	0.379871	Intron-(uc008wal.1/16498,-intron-3-of-15)	ENSMUSG00000028931	Kcnab2	potassium-voltage-gated-channel,-shaker-related-subfamily,-beta-member-2			Hyper
Chr11	109726615	109727800	-0.496686	0.00601617	0.380592	Distal-Intergenic	NA	NA	NA			Hypo
Chr17	47272172	47273215	-0.531256	0.00602667	0.380592	Distal-Intergenic	NA	NA	NA			Hypo
Chr15	12093152	12094171	-0.662451	0.00611286	0.383774	Intron-(uc007vhk.2/22763,-intron-14-of-19)	ENSMUSG00000084592	Mir1898	microRNA-1898			Hypo
Chr5	111514863	111516532	0.432399	0.00612191	0.383774	Intron-(uc008yrz.2/209683,-intron-3-of-24)	ENSMUSG00000076163	Mir701	microRNA-701			Hyper
Chr5	82050106	82051199	0.507416	0.0061579	0.384622	Intron-(uc008xwk.1/319387,-intron-9-of-12)	ENSMUSG00000037605	Adgrl3	adhesion-G-protein-coupled-receptor-L3			Hyper
Chr6	114009509	114010527	0.44201	0.00626274	0.389748	Distal-Intergenic	NA	NA	NA			Hyper
Chr10	12607772	12608926	0.561623	0.00638702	0.394171	Distal-Intergenic	NA	NA	NA			Hyper
Chr7	142365754	142367444	-0.479768	0.0064053	0.394171	Distal-Intergenic	NA	NA	NA			Hypo
Chr2	116041243	116042328	-0.600609	0.00643784	0.394171	Distal-Intergenic	NA	NA	NA			Hypo
Chr17	73568596	73569622	0.510822	0.00645384	0.394171	Intron-(uc008dnh.2/225010,-intron-5-of-5)	ENSMUSG00000054469	Lclat1	lysocardiolipin-acyltransferase-1			Hyper
Chr4	134615900	134616972	0.523048	0.00645592	0.394171	Distal-Intergenic	NA	NA	NA			Hyper
Chr15	91577768	91578837	0.508005	0.00647201	0.394171	Exon-(uc007xhz.1/66725,-exon-28-of-51)	ENSMUSG00000036273	Lrrk2	leucine-rich-repeat-kinase-2		yes	Hyper
Chr10	69851998	69853682	0.424297	0.00660352	0.400609	Distal-Intergenic	NA	NA	NA			Hyper
Chr10	36850476	36851850	0.419646	0.00662455	0.400609	Downstream-(1-2kb)	ENSMUSG00000069662	Marcks	myristoylated-alanine-rich-protein-kinase-C-substrate		yes	Hyper
Chr9	121381554	121383264	-0.336689	0.0067659	0.401121	3'-UTR	ENSMUSG00000032532	Cck	cholecystokinin		yes	Hypo
Chr15	12241269	12242328	-0.5565	0.00676791	0.401121	Distal-Intergenic	NA	NA	NA			Hypo
Chr6	145108197	145109300	-0.52272	0.00677001	0.401121	Exon-(uc009eqv.1/16970,-exon-10-of-20)	ENSMUSG00000030263	Lrmp	lymphoid-restricted-membrane-protein			Hypo
Chr1	21017735	21018745	-0.458677	0.00681083	0.401121	Intron-(uc007alg.1/170829,-intron-2-of-10)	ENSMUSG00000041779	Tram2	translocating-chain-associating-membrane-protein-2			Hypo
Chr18	35617744	35618809	0.519949	0.0068299	0.401121	Intron-(uc008emc.2/81500,-intron-1-of-9)	ENSMUSG00000024357	Sil1	endoplasmic-reticulum-chaperone-SIL1-homolog-(S.-cerevisiae)			Hyper
Chr5	139422993	139424054	-0.49929	0.00686438	0.401121	Distal-Intergenic	NA	NA	NA			Hypo
Chr11	5422842	5423848	0.525603	0.00688376	0.401121	Promoter-(<=1kb)	ENSMUSG00000020484	Xbp1	X-box-binding-protein-1		yes	Hyper
Chr12	16145902	16148179	0.376623	0.00692168	0.401121	Distal-Intergenic	NA	NA	NA			Hyper
Chr8	127535590	127536979	0.511107	0.00693894	0.401121	Promoter-(<=1kb)	ENSMUSG00000056820	Tsnax	translin-associated-factor-X		yes	Hyper
Chr11	71685159	71686179	0.587272	0.00697594	0.401121	Distal-Intergenic	NA	NA	NA			Hyper
Chr8	118750996	118752582	-0.428906	0.00702699	0.401121	Distal-Intergenic	NA	NA	NA			Hypo
Chr1	71520514	71521626	-0.595413	0.00709123	0.401121	Distal-Intergenic	NA	NA	NA			Hypo
Chr13	9886066	9887160	0.513854	0.00710044	0.401121	Intron-(uc007plb.1/12671,-intron-4-of-4)	ENSMUSG00000021156	Zmynd11	zinc-finger,-MYND-domain-containing-11	yes		Hyper
Chr6	143946510	143947664	-0.50498	0.00710965	0.401121	Intron-(uc009eqk.2/20678,-intron-6-of-14)	ENSMUSG00000041540	Sox5	SRY-(sex-determining-region-Y)-box-5			Hypo
Chr19	15107957	15109030	-0.484825	0.00712608	0.401121	Distal-Intergenic	NA	NA	NA			Hypo
Chr14	79473655	79474659	0.485724	0.00713152	0.401121	Intron-(uc007usq.2/219189,-intron-26-of-44)	ENSMUSG00000071262	Zfp957	zinc-finger-protein-957			Hyper
Chr2	58651344	58652457	-0.454766	0.00713931	0.401121	Distal-Intergenic	NA	NA	NA			Hypo
Chr13	78350321	78352094	0.416959	0.00714544	0.401121	Intron-(uc007rhf.1/uc007rhf.1,-intron-1-of-2)	ENSMUSG00000069171	Nr2f1	nuclear-receptor-subfamily-2,-group-F,-member-1			Hyper
Chr18	69598204	69599243	0.396754	0.00716309	0.401121	Intron-(uc008fnp.1/21413,-intron-2-of-6)	ENSMUSG00000053477	Tcf4	transcription-factor-4	yes	yes	Hyper
Chr15	75902462	75903483	-0.476849	0.00717965	0.401121	Promoter-(2-3kb)	ENSMUSG00000022568	Scrib	scribbled-planar-cell-polarity			Hypo
Chr10	126000800	126001813	0.629822	0.00718465	0.401121	Distal-Intergenic	NA	NA	NA			Hyper
Chr18	75500757	75502080	-0.460383	0.00719008	0.401121	Distal-Intergenic	NA	NA	NA			Hypo
Chr11	86898498	86899691	0.471255	0.0071998	0.401121	Promoter-(<=1kb)	ENSMUSG00000020495	Smg8	smg-8-homolog,-nonsense-mediated-mRNA-decay-factor-(C.-elegans)			Hyper
Chr3	105746129	105747306	0.607052	0.00724222	0.401121	Exon-(uc008qvl.1/11950,-exon-7-of-8)	ENSMUSG00000074342	I830077J02Rik	RIKEN-cDNA-I830077J02-gene			Hyper
Chr7	108681741	108682933	-0.456143	0.00724467	0.401121	Distal-Intergenic	NA	NA	NA			Hypo
Chr12	55752758	55754379	0.437253	0.00725007	0.401121	Intron-(uc007nnt.1/104725,-intron-1-of-1)	ENSMUSG00000044408	Sptssa	serine-palmitoyltransferase,-small-subunit-A			Hyper
Chr3	87604060	87605226	-0.493891	0.00727543	0.401121	Exon-(uc008psx.2/23920,-exon-2-of-7)	ENSMUSG00000005640	Insrr	insulin-receptor-related-receptor			Hypo
Chr16	64844868	64846371	-0.439024	0.00730639	0.401121	Distal-Intergenic	NA	NA	NA			Hypo
Chr15	73237601	73239198	0.42187	0.00731271	0.401121	Intron-(uc007wbw.2/14083,-intron-1-of-33)	ENSMUSG00000022607	Ptk2	PTK2-protein-tyrosine-kinase-2		yes	Hyper
Chr4	100523220	100524492	-0.547553	0.00738092	0.403569	Intron-(uc008tvg.1/320508,-intron-1-of-18)	ENSMUSG00000028532	Cachd1	cache-domain-containing-1			Hypo
Chr5	152053950	152055254	0.473007	0.00747071	0.407178	Distal-Intergenic	NA	NA	NA			Hyper
Chr9	75293050	75294158	0.44002	0.00753075	0.408392	Exon-(uc009qsh.1/235497,-exon-2-of-12)	ENSMUSG00000042487	Leo1	Leo1,-Paf1/RNA-polymerase-II-complex-component	yes		Hyper
Chr9	111115820	111117703	0.422741	0.00754072	0.408392	Exon-(uc009rvm.2/71268,-exon-9-of-14)	ENSMUSG00000032497	Lrrfip2	leucine-rich-repeat-(in-FLII)-interacting-protein-2			Hyper
Chr9	77347757	77348839	0.51738	0.00762339	0.411296	Intron-(uc009qtj.2/214345,-intron-1-of-13)	ENSMUSG00000032352	Lrrc1	leucine-rich-repeat-containing-1			Hyper
Chr8	81579100	81580165	0.378822	0.0076424	0.411296	Intron-(uc009mig.1/622675,-intron-1-of-2)	ENSMUSG00000071064	Zfp827	zinc-finger-protein-827			Hyper
Chr6	48545824	48547355	-0.31662	0.00777449	0.417093	Promoter-(1-2kb)	ENSMUSG00000052751	Repin1	replication-initiator-1			Hypo
Chr13	43295250	43296773	-0.322073	0.00790706	0.422879	3'-UTR	ENSMUSG00000021368	Tbc1d7	TBC1-domain-family,-member-7			Hypo
Chr1	14743901	14745042	-0.465157	0.0079658	0.424694	Promoter-(1-2kb)	ENSMUSG00000025930	Msc	musculin			Hypo
Chr8	95393135	95394142	-0.460515	0.00803975	0.426317	5'-UTR	ENSMUSG00000033192	Lpcat2	lysophosphatidylcholine-acyltransferase-2			Hypo
Chr9	44684732	44686072	0.478253	0.00806811	0.426317	Intron-(uc009pep.1/214162,-intron-1-of-35)	ENSMUSG00000002028	Kmt2a	lysine-(K)-specific-methyltransferase-2A	yes		Hyper
Chr16	14379645	14380725	-0.425064	0.00809112	0.426317	Intron-(uc007yhj.1/17250,-intron-1-of-30)	ENSMUSG00000023088	Abcc1	ATP-binding-cassette,-sub-family-C-(CFTR/MRP),-member-1		yes	Hypo
Chr18	69149285	69150395	0.578055	0.00813051	0.426317	Distal-Intergenic	NA	NA	NA			Hyper
Chr2	164338693	164340689	-0.334505	0.00815049	0.426317	Distal-Intergenic	NA	NA	NA			Hypo
Chr14	61017862	61019264	-0.396727	0.00819734	0.426317	Distal-Intergenic	NA	NA	NA			Hypo
Chr4	8520087	8521245	0.577162	0.00819875	0.426317	Intron-(uc008rxw.1/59021,-intron-6-of-7)	ENSMUSG00000047187	Rab2a	RAB2A,-member-RAS-oncogene-family	yes		Hyper
Chr19	61042618	61043713	0.539564	0.00825302	0.426317	Intron-(uc008ice.2/14773,-intron-1-of-15)	ENSMUSG00000003228	Grk5	G-protein-coupled-receptor-kinase-5		yes	Hyper
Chr7	152299553	152300786	0.448605	0.00827066	0.426317	Distal-Intergenic	NA	NA	NA			Hyper
Chr9	20771603	20772922	0.491904	0.00828382	0.426317	3'-UTR	ENSMUSG00000004099	Dnmt1	DNA-methyltransferase-(cytosine-5)-1		yes	Hyper
Chr11	75335220	75336554	-0.480706	0.00831204	0.426317	Exon-(uc007kea.1/380713,-exon-7-of-11)	ENSMUSG00000038188	Scarf1	scavenger-receptor-class-F,-member-1			Hypo
Chr11	48914984	48916620	0.447338	0.00831655	0.426317	Intron-(uc007ipo.1/18356,-intron-2-of-5)	ENSMUSG00000047511	Olfr1396	olfactory-receptor-1396			Hyper
Chr11	4600450	4602513	0.355216	0.00833935	0.426317	Promoter-(1-2kb)	ENSMUSG00000059534	Uqcr10	ubiquinol-cytochrome-c-reductase,-complex-III-subunit-X			Hyper
Chr7	37270610	37271652	-0.509458	0.00839651	0.426317	Distal-Intergenic	NA	NA	NA			Hypo
Chr13	53236738	53237896	-0.494419	0.00840705	0.426317	Intron-(uc007qnj.1/26564,-intron-2-of-8)	ENSMUSG00000021464	Ror2	receptor-tyrosine-kinase-like-orphan-receptor-2		yes	Hypo
Chr6	91272361	91273556	0.408893	0.00843874	0.426317	Distal-Intergenic	NA	NA	NA			Hyper
Chr12	112740777	112742120	-0.409133	0.00846386	0.426317	Promoter-(2-3kb)	ENSMUSG00000010529	Gm266	predicted-gene-266			Hypo
Chr10	82723139	82724341	0.459456	0.00848306	0.426317	Intron-(uc007gkf.1/338365,-intron-8-of-10)	ENSMUSG00000034591	Slc41a2	solute-carrier-family-41,-member-2			Hyper
Chr8	118808075	118809210	-0.620219	0.00848755	0.426317	Distal-Intergenic	NA	NA	NA			Hypo
Chr1	99951688	99952721	-0.466307	0.00849446	0.426317	Intron-(uc007cfo.1/18484,-intron-1-of-25)	ENSMUSG00000026335	Pam	peptidylglycine-alpha-amidating-monooxygenase		yes	Hypo
Chr19	22017469	22019336	-0.370399	0.00859134	0.427053	Distal-Intergenic	NA	NA	NA			Hypo
Chr1	84828061	84829339	0.582476	0.00859394	0.427053	Intron-(uc007bsy.1/14897,-intron-1-of-40)	ENSMUSG00000026219	Trip12	thyroid-hormone-receptor-interactor-12		yes	Hyper
Chr7	74952237	74953501	0.408953	0.00860677	0.427053	Distal-Intergenic	NA	NA	NA			Hyper
Chr19	3786150	3787166	0.494487	0.00865205	0.427053	5'-UTR	ENSMUSG00000045098	Kmt5b	lysine-methyltransferase-5B			Hyper
Chr6	112924170	112925404	-0.424043	0.00865206	0.427053	Distal-Intergenic	NA	NA	NA			Hypo
Chr6	117122979	117124045	0.399401	0.00865883	0.427053	3'-UTR	ENSMUSG00000061353	Cxcl12	chemokine-(C-X-C-motif)-ligand-12		yes	Hyper
Chr19	56440272	56441567	0.393273	0.00874769	0.429049	Exon-(uc012bnq.1/18175,-exon-5-of-28)	ENSMUSG00000049134	Nrap	nebulin-related-anchoring-protein			Hyper
Chr10	40718003	40720168	-0.344222	0.00877374	0.429049	Distal-Intergenic	NA	NA	NA			Hypo
Chr5	151465844	151466961	0.439087	0.00879239	0.429049	Promoter-(1-2kb)	ENSMUSG00000029655	N4bp2l2	NEDD4-binding-protein-2-like-2			Hyper
Chr10	98927681	98928768	0.526977	0.00884345	0.429049	Distal-Intergenic	NA	NA	NA			Hyper
Chr12	86148236	86149347	-0.41332	0.00887567	0.429049	3'-UTR	ENSMUSG00000002020	Ltbp2	latent-transforming-growth-factor-beta-binding-protein-2		yes	Hypo
Chr11	100001892	100002893	0.399106	0.00891414	0.429049	3'-UTR	ENSMUSG00000020911	Krt19	keratin-19		yes	Hyper
Chr15	77764386	77765427	-0.547678	0.00893639	0.429049	Distal-Intergenic	NA	NA	NA			Hypo
Chr19	21736414	21737493	0.435039	0.00893886	0.429049	Intron-(uc008gza.1/226016,-intron-1-of-2)	ENSMUSG00000047368	Abhd17b	abhydrolase-domain-containing-17B			Hyper
Chr11	61764456	61766134	0.394191	0.00894966	0.429049	Distal-Intergenic	NA	NA	NA			Hyper
Chr5	54544896	54545907	0.550285	0.00895001	0.429049	Distal-Intergenic	NA	NA	NA			Hyper
Chr6	124882395	124883554	-0.508066	0.00905232	0.432742	Promoter-(<=1kb)	ENSMUSG00000030120	Mlf2	myeloid-leukemia-factor-2			Hypo
Chr1	189564251	189565323	0.447531	0.00915702	0.435659	Intron-(uc007eaa.1/26381,-intron-1-of-7)	ENSMUSG00000026610	Esrrg	estrogen-related-receptor-gamma		yes	Hyper
Chr3	137532143	137533954	0.38179	0.00916426	0.435659	Promoter-(1-2kb)	ENSMUSG00000074212	Dnajb14	DnaJ-heat-shock-protein-family-(Hsp40)-member-B14			Hyper
Chr12	59368062	59369211	0.512433	0.00925373	0.438693	Promoter-(1-2kb)	ENSMUSG00000045930	Clec14a	C-type-lectin-domain-family-14,-member-a		yes	Hyper
Chr9	101972019	101973200	-0.45871	0.00949775	0.449018	Intron-(uc009rfn.2/270190,-intron-3-of-15)	ENSMUSG00000032537	Ephb1	Eph-receptor-B1		yes	Hypo
Chr11	107469796	107471160	-0.409367	0.00965132	0.450038	Intron-(uc007mau.1/78455,-intron-12-of-29)	ENSMUSG00000020721	Helz	helicase-with-zinc-finger-domain			Hypo
Chr18	61727530	61728571	0.524963	0.00965746	0.450038	Exon-(uc008fcc.1/93687,-exon-3-of-9)	ENSMUSG00000024576	Csnk1a1	casein-kinase-1,-alpha-1		yes	Hyper
Chr2	143831537	143833790	0.331962	0.00970649	0.450038	Intron-(uc008mqj.1/81910,-intron-1-of-23)	ENSMUSG00000027422	Rrbp1	ribosome-binding-protein-1		yes	Hyper
Chr6	93730075	93731149	-0.583073	0.00972684	0.450038	Intron-(uc009czi.1/14924,-intron-4-of-22)	ENSMUSG00000045095	Magi1	membrane-associated-guanylate-kinase,-WW-and-PDZ-domain-containing-1		yes	Hypo
Chr18	81411645	81412732	-0.481306	0.00973615	0.450038	Distal-Intergenic	NA	NA	NA			Hypo
Chr7	88801320	88802532	0.578269	0.00975314	0.450038	Intron-(uc012foa.1/26557,-intron-1-of-8)	ENSMUSG00000025813	Homer2	homer-scaffolding-protein-2		yes	Hyper
Chr13	111665968	111667338	-0.428135	0.00982591	0.450038	Distal-Intergenic	NA	NA	NA			Hypo
Chr10	116284947	116286094	-0.513106	0.00983789	0.450038	Exon-(uc007hci.1/237558,-exon-4-of-25)	ENSMUSG00000034057	Myrfl	myelin-regulatory-factor-like			Hypo
Chr7	108267463	108268490	0.590884	0.00986049	0.450038	Intron-(uc009iob.2/207278,-intron-2-of-2)	ENSMUSG00000030691	Fchsd2	FCH-and-double-SH3-domains-2			Hyper
Chr12	74780944	74782165	0.459506	0.00988388	0.450038	Intron-(uc007nwn.1/18755,-intron-2-of-13)	ENSMUSG00000021108	Prkch	protein-kinase-C,-eta		yes	Hyper
Chr9	108352931	108354007	0.445091	0.00988439	0.450038	Promoter-(1-2kb)	ENSMUSG00000032609	Klhdc8b	kelch-domain-containing-8B			Hyper
Chr8	112171916	112173053	-0.524374	0.00989008	0.450038	Promoter-(<=1kb)	ENSMUSG00000048827	Pkd1l3	polycystic-kidney-disease-1-like-3			Hypo
Chr7	122552518	122554000	0.407915	0.0098956	0.450038	Distal-Intergenic	NA	NA	NA			Hyper
Chr5	124297438	124298733	-0.430929	0.00990023	0.450038	Distal-Intergenic	NA	NA	NA			Hypo
Chr18	35004925	35006654	-0.342168	0.00992181	0.450038	Promoter-(<=1kb)	ENSMUSG00000038555	Reep2	receptor-accessory-protein-2			Hypo
Chr13	114409565	114410999	0.442544	0.00996469	0.450038	Promoter-(<=1kb)	ENSMUSG00000042364	Snx18	sorting-nexin-18			Hyper
Chr10	94328870	94330727	0.423244	0.00997419	0.450038	Exon-(uc007gvz.2/54712,-exon-7-of-31)	ENSMUSG00000074785	Plxnc1	plexin-C1		yes	Hyper
Chr15	33543703	33544759	0.589535	0.0100748	0.450038	Distal-Intergenic	NA	NA	NA			Hyper
Chr1	64233133	64234203	0.580738	0.0100768	0.450038	Distal-Intergenic	NA	NA	NA			Hyper
Chr17	45837947	45839571	-0.384439	0.0100842	0.450038	Distal-Intergenic	NA	NA	NA			Hypo
Chr6	122841108	122842226	0.500591	0.0101477	0.450038	Distal-Intergenic	NA	NA	NA			Hyper
Chr17	29463864	29465370	-0.314012	0.0101488	0.450038	3'-UTR	ENSMUSG00000024012	Mtch1	mitochondrial-carrier-1			Hypo
Chr5	98431549	98432564	0.484832	0.010155	0.450038	Exon-(uc008yga.1/71914,-exon-7-of-17)	ENSMUSG00000029338	Antxr2	anthrax-toxin-receptor-2			Hyper
Chr9	65025655	65026761	-0.406119	0.0101619	0.450038	Exon-(uc009qcv.1/19289,-exon-4-of-14)	ENSMUSG00000032392	Parp16	poly-(ADP-ribose)-polymerase-family,-member-16			Hypo
Chr4	137125029	137126072	0.426848	0.0102389	0.450038	3'-UTR	ENSMUSG00000094035	Ldlrad2	low-density-lipoprotein-receptor-A-domain-containing-2			Hyper
Chr2	153145824	153147134	0.583195	0.0102433	0.450038	Exon-(uc008nhp.2/16569,-exon-3-of-9)	ENSMUSG00000042548	Asxl1	additional-sex-combs-like-1			Hyper
Chr17	45669570	45670957	-0.448446	0.0102762	0.450038	5'-UTR	ENSMUSG00000023949	Tcte1	t-complex-associated-testis-expressed-1			Hypo
Chr15	64063191	64064278	0.495076	0.0102824	0.450038	Intron-(uc007vzh.1/13196,-intron-1-of-28)	ENSMUSG00000022377	Asap1	ArfGAP-with-SH3-domain,-ankyrin-repeat-and-PH-domain1			Hyper
Chr16	98058322	98059644	-0.450351	0.0102946	0.450038	5'-UTR	ENSMUSG00000014039	Prdm15	PR-domain-containing-15			Hypo
Chr5	32787270	32788386	0.507528	0.0103444	0.450038	Exon-(uc008wzq.2/19046,-exon-5-of-8)	ENSMUSG00000014956	Ppp1cb	protein-phosphatase-1,-catalytic-subunit,-beta-isoform		yes	Hyper
Chr7	75655852	75657166	-0.469297	0.0103669	0.450038	Distal-Intergenic	NA	NA	NA			Hypo
Chr13	24777522	24778671	0.480695	0.0104255	0.450038	Intron-(uc007pwa.1/193385,-intron-8-of-12)	ENSMUSG00000036006	Ripor2	RHO-family-interacting-cell-polarization-regulator-2			Hyper
Chr1	72811704	72812982	-0.449842	0.010461	0.450038	Distal-Intergenic	NA	NA	NA			Hypo
Chr5	137930364	137931606	0.462254	0.010492	0.450038	Intron-(uc009acn.1/13856,-intron-1-of-2)	ENSMUSG00000029711	Epo	erythropoietin		yes	Hyper
Chr4	123669258	123670320	0.540718	0.0105174	0.450038	Distal-Intergenic	NA	NA	NA			Hyper
Chr18	67526100	67527119	0.487604	0.0105225	0.450038	Exon-(uc012beh.1/12683,-exon-4-of-5)	ENSMUSG00000046415	B430212C06Rik	RIKEN-cDNA-B430212C06-gene			Hyper
Chr2	181348799	181350019	0.513975	0.0105396	0.450038	Intron-(uc008omy.1/68879,-intron-2-of-11)	ENSMUSG00000002455	Prpf6	pre-mRNA-splicing-factor-6		yes	Hyper
Chr6	113356221	113357294	-0.468152	0.0105575	0.450038	Exon-(uc009dfv.2/101100,-exon-10-of-13)	ENSMUSG00000030276	Ttll3	tubulin-tyrosine-ligase-like-family,-member-3	yes		Hypo
Chr10	67486203	67487422	0.403158	0.0105653	0.450038	Intron-(uc011xfq.1/170799,-intron-7-of-11)	ENSMUSG00000037846	Rtkn2	rhotekin-2			Hyper
Chr1	82601608	82602821	-0.46086	0.0105974	0.450038	Intron-(uc007bru.1/12828,-intron-1-of-1)	ENSMUSG00000079465	Col4a3	collagen,-type-IV,-alpha-3			Hypo
Chr3	41121087	41122264	0.490517	0.0106178	0.450038	Distal-Intergenic	NA	NA	NA			Hyper
Chr6	99101367	99102532	0.399405	0.0106238	0.450038	Intron-(uc009dbj.2/108655,-intron-1-of-15)	ENSMUSG00000030067	Foxp1	forkhead-box-P1	yes		Hyper
Chr2	105448205	105449651	-0.466475	0.0106626	0.450566	Intron-(uc008lkt.1/402728,-intron-1-of-3)	ENSMUSG00000027168	Pax6	paired-box-6		yes	Hypo
Chr5	136707023	136708564	-0.392697	0.0107121	0.451543	5'-UTR	ENSMUSG00000005057	Sh2b2	SH2B-adaptor-protein-2		yes	Hypo
Chr1	173264248	173265283	0.470048	0.0107677	0.452772	Promoter-(2-3kb)	ENSMUSG00000013973	Dedd	death-effector-domain-containing			Hyper
Chr9	32281976	32282990	-0.496582	0.0108491	0.455079	Intron-(uc009orz.1/14247,-intron-2-of-8)	ENSMUSG00000016087	Fli1	Friend-leukemia-integration-1		yes	Hypo
Chr4	117929378	117930792	-0.350484	0.0108806	0.455283	Exon-(uc008ujq.1/19268,-exon-6-of-33)	ENSMUSG00000033295	Ptprf	protein-tyrosine-phosphatase,-receptor-type,-F			Hypo
Chr8	114455204	114456325	0.453468	0.0109321	0.45632	Promoter-(1-2kb)	ENSMUSG00000031951	Tmem231	transmembrane-protein-231			Hyper
Chr2	102433542	102434792	-0.542005	0.0109764	0.456694	Intron-(uc008lhy.2/210622,-intron-3-of-6)	ENSMUSG00000027188	Pamr1	peptidase-domain-containing-associated-with-muscle-regeneration-1			Hypo
Chr15	81189725	81190923	-0.489197	0.0110529	0.456694	Promoter-(<=1kb)	ENSMUSG00000022404	Slc25a17	solute-carrier-family-25-(mitochondrial-carrier,-peroxisomal-membrane-protein),-member-17			Hypo
Chr4	128106484	128108133	0.346814	0.0110844	0.456694	Intron-(uc008uvb.1/uc008uvb.1,-intron-5-of-34)	ENSMUSG00000048686	Hmgb4	high-mobility-group-box-4			Hyper
Chr19	11997869	11998947	-0.555592	0.0111015	0.456694	Exon-(uc008gth.2/225929,-exon-7-of-19)	ENSMUSG00000046139	Patl1	protein-associated-with-topoisomerase-II-homolog-1-(yeast)			Hypo
Chr4	4634357	4635425	-0.517869	0.0111039	0.456694	Distal-Intergenic	NA	NA	NA			Hypo
Chr9	77974641	77975870	0.410853	0.0111046	0.456694	Intron-(uc009qtt.2/56542,-intron-1-of-13)	ENSMUSG00000009828	Ick	intestinal-cell-kinase			Hyper
Chr8	49839720	49840777	-0.558669	0.0111385	0.456694	Distal-Intergenic	NA	NA	NA			Hypo
Chr7	128675045	128676717	-0.486933	0.0111814	0.456694	Intron-(uc009jns.1/uc009jns.1,-intron-2-of-5)	ENSMUSG00000046321	Hs3st2	heparan-sulfate-(glucosamine)-3-O-sulfotransferase-2		yes	Hypo
Chr4	44373136	44375097	-0.407038	0.0111954	0.456694	Exon-(uc008srv.1/17279,-exon-17-of-18)	ENSMUSG00000035683	Melk	maternal-embryonic-leucine-zipper-kinase		yes	Hypo
Chr9	34977331	34978333	0.539526	0.0112324	0.456694	Intron-(uc009osp.1/69305,-intron-2-of-5)	ENSMUSG00000032040	Dcps	decapping-enzyme,-scavenger		yes	Hyper
Chr2	52067560	52068636	-0.466607	0.0112346	0.456694	Exon-(uc008jqv.1/17996,-exon-88-of-157)	ENSMUSG00000026950	Neb	nebulin		yes	Hypo
Chr11	84597472	84598668	0.46206	0.0112706	0.457075	Distal-Intergenic	NA	NA	NA			Hyper
Chr3	68494165	68496725	0.301393	0.011325	0.457814	Promoter-(<=1kb)	ENSMUSG00000027776	Il12a	interleukin-12a		yes	Hyper
Chr9	96570667	96572141	0.471534	0.01136	0.457814	Distal-Intergenic	NA	NA	NA			Hyper
Chr18	5740492	5741599	0.508769	0.0113691	0.457814	Intron-(uc008dyy.1/21417,-intron-2-of-7)	ENSMUSG00000024238	Zeb1	zinc-finger-E-box-binding-homeobox-1		yes	Hyper
Chr5	23428600	23430167	-0.415899	0.0114359	0.458098	Intron-(uc008wqu.1/84652,-intron-10-of-10)	NA	Snord93	small-nucleolar-RNA,-C/D-box-93			Hypo
Chr4	75997303	75998322	0.552929	0.0114478	0.458098	Intron-(uc008tjm.1/19266,-intron-1-of-30)	ENSMUSG00000028399	Ptprd	protein-tyrosine-phosphatase,-receptor-type,-D	yes		Hyper
Chr9	59319249	59320557	0.387168	0.0114565	0.458098	Intron-(uc009pxs.2/23806,-intron-1-of-13)	ENSMUSG00000025234	Arih1	ariadne-RBR-E3-ubiquitin-protein-ligase-1		yes	Hyper
Chr2	130407802	130409005	0.434479	0.0115086	0.458759	Promoter-(<=1kb)	ENSMUSG00000037727	Avp	arginine-vasopressin		yes	Hyper
Chr13	114525822	114527414	-0.463382	0.0115706	0.458759	Distal-Intergenic	NA	NA	NA			Hypo
Chr14	75167972	75169179	-0.511908	0.0115781	0.458759	Intron-(uc007uqf.1/380916,-intron-19-of-19)	ENSMUSG00000021996	Esd	esterase-D/formylglutathione-hydrolase		yes	Hypo
Chr14	46469776	46470939	0.487437	0.0115802	0.458759	Distal-Intergenic	NA	NA	NA			Hyper
Chr11	111693494	111694518	-0.659536	0.0116209	0.459309	Distal-Intergenic	NA	NA	NA			Hypo
Chr7	108437991	108439553	-0.388519	0.0116527	0.459505	3'-UTR	ENSMUSG00000047767	Atg16l2	autophagy-related-16-like-2-(S.-cerevisiae)			Hypo
Chr14	27713253	27714703	-0.437465	0.0117206	0.461118	Exon-(uc011zht.1/142687,-exon-3-of-9)	ENSMUSG00000021898	Asb14	ankyrin-repeat-and-SOCS-box-containing-14			Hypo
Chr11	101417589	101419389	-0.446125	0.0117627	0.461714	Exon-(uc007lpg.1/17966,-exon-4-of-24)	ENSMUSG00000017119	Nbr1	neighbor-of-Brca1-gene-1		yes	Hypo
Chr18	84923169	84924392	0.537786	0.0118016	0.46218	Distal-Intergenic	NA	NA	NA			Hyper
Chr2	147000621	147001815	0.442212	0.0118501	0.462816	Downstream-(1-2kb)	ENSMUSG00000086509	Nkx2-2os	NK2-homeobox-2,-opposite-strand			Hyper
Chr9	65387061	65388132	-0.504332	0.0118772	0.462816	Distal-Intergenic	NA	NA	NA			Hypo
Chr5	135279695	135280776	-0.534148	0.0119246	0.462816	Distal-Intergenic	NA	NA	NA			Hypo
Chr4	127661636	127662769	-0.439423	0.011926	0.462816	Distal-Intergenic	NA	NA	NA			Hypo
Chr18	57498182	57499954	-0.396617	0.0120946	0.464776	Distal-Intergenic	NA	NA	NA			Hypo
Chr7	4096397	4097533	0.384044	0.0121479	0.464776	3'-UTR	ENSMUSG00000043432	Leng9	leukocyte-receptor-cluster-(LRC)-member-9			Hyper
Chr8	126396638	126397826	0.57313	0.0121574	0.464776	Distal-Intergenic	NA	NA	NA			Hyper
Chr2	180208354	180209454	-0.458533	0.0121764	0.464776	Promoter-(1-2kb)	ENSMUSG00000038963	Slco4a1	solute-carrier-organic-anion-transporter-family,-member-4a1			Hypo
Chr5	3488098	3489309	0.45053	0.012177	0.464776	Intron-(uc008wgu.1/12571,-intron-5-of-7)	ENSMUSG00000058503	Fam133b	family-with-sequence-similarity-133,-member-B			Hyper
Chr13	63332635	63333758	0.539609	0.0121824	0.464776	Intron-(uc007qxi.1/72061,-intron-10-of-14)	ENSMUSG00000021458	2010111I01Rik	RIKEN-cDNA-2010111I01-gene			Hyper
Chr8	26323460	26324500	-0.433028	0.0121856	0.464776	Intron-(uc009lfv.1/320165,-intron-1-of-2)	ENSMUSG00000065954	Tacc1	transforming,-acidic-coiled-coil-containing-protein-1			Hypo
Chr5	122061730	122063027	0.507124	0.0122048	0.464776	Intron-(uc008zjv.2/338350,-intron-2-of-10)	ENSMUSG00000042647	Acad12	acyl-Coenzyme-A-dehydrogenase-family,-member-12			Hyper
Chr5	104625937	104627156	0.375329	0.0122384	0.464776	Distal-Intergenic	NA	NA	NA			Hyper
Chr9	89749038	89750078	-0.50392	0.0122509	0.464776	Intron-(uc009qzq.1/uc009qzq.1,-intron-3-of-5)	ENSMUSG00000065596	Mir184	microRNA-184			Hypo
Chr4	8528312	8529477	0.488848	0.0122753	0.464776	Intron-(uc008rxw.1/59021,-intron-6-of-7)	ENSMUSG00000047187	Rab2a	RAB2A,-member-RAS-oncogene-family	yes		Hyper
Chr10	40117048	40118915	0.402723	0.0123136	0.465198	Intron-(uc007ewt.2/78334,-intron-2-of-11)	ENSMUSG00000038481	Cdk19	cyclin-dependent-kinase-19			Hyper
Chr3	101353652	101354662	0.464355	0.0124052	0.467627	Distal-Intergenic	NA	NA	NA			Hyper
Chr17	73212431	73213454	0.459284	0.0124729	0.468009	Distal-Intergenic	NA	NA	NA			Hyper
Chr15	102290597	102291764	0.36203	0.0124821	0.468009	Promoter-(<=1kb)	ENSMUSG00000023048	Prr13	proline-rich-13			Hyper
Chr4	95364312	95365321	-0.562528	0.0124974	0.468009	Intron-(uc008tsw.2/75578,-intron-4-of-12)	ENSMUSG00000028573	Fggy	FGGY-carbohydrate-kinase-domain-containing			Hypo
Chr2	178185179	178186289	0.432014	0.0125743	0.468931	Intron-(uc008ohr.1/381409,-intron-3-of-14)	ENSMUSG00000039155	Cdh26	cadherin-like-26			Hyper
Chr9	114601272	114602415	0.513106	0.0125768	0.468931	Intron-(uc009rxx.1/235661,-intron-2-of-2)	ENSMUSG00000032435	Dync1li1	dynein-cytoplasmic-1-light-intermediate-chain-1			Hyper
Chr12	54958923	54960075	0.497731	0.0126255	0.469725	Intron-(uc007nno.1/27386,-intron-5-of-11)	ENSMUSG00000035105	Egln3	egl-9-family-hypoxia-inducible-factor-3		yes	Hyper
Chr10	62939743	62940782	0.466916	0.0128104	0.472415	Intron-(uc007fkh.2/216033,-intron-1-of-17)	ENSMUSG00000060843	Ctnna3	catenin-(cadherin-associated-protein),-alpha-3	yes	yes	Hyper
Chr18	82321542	82323189	0.437905	0.0128254	0.472415	Distal-Intergenic	NA	NA	NA			Hyper
Chr15	94664434	94665676	0.394721	0.0128615	0.472415	Intron-(uc007xjn.1/320709,-intron-3-of-7)	ENSMUSG00000063296	Tmem117	transmembrane-protein-117			Hyper
Chr7	133635358	133636791	-0.374408	0.0128658	0.472415	3'-UTR	ENSMUSG00000073838	Tufm	Tu-translation-elongation-factor,-mitochondrial			Hypo
Chr10	87896002	87897111	-0.540845	0.012871	0.472415	Exon-(uc007grk.1/432486,-exon-14-of-14)	ENSMUSG00000020059	Sycp3	synaptonemal-complex-protein-3			Hypo
Chr12	103588312	103589453	-0.576037	0.0129613	0.472415	Exon-(uc007ouc.2/217835,-exon-4-of-10)	ENSMUSG00000044456	Rin3	Ras-and-Rab-interactor-3			Hypo
Chr7	127822578	127823581	0.45306	0.0129719	0.472415	Promoter-(1-2kb)	ENSMUSG00000046096	BC030336	cDNA-sequence-BC030336			Hyper
Chr19	28281613	28282959	-0.423839	0.012996	0.472415	Distal-Intergenic	NA	NA	NA			Hypo
Chr15	97573753	97574953	-0.367262	0.0130334	0.472415	Downstream-(<1kb)	ENSMUSG00000022468	Endou	endonuclease,-polyU-specific			Hypo
Chr9	99147183	99148258	-0.498977	0.0130346	0.472415	Intron-(uc009rdw.1/68121,-intron-2-of-5)	ENSMUSG00000056267	Cep70	centrosomal-protein-70		yes	Hypo
Chr4	130239111	130240217	-0.561817	0.0130524	0.472415	Intron-(uc008uzk.2/80912,-intron-2-of-20)	ENSMUSG00000028580	Pum1	pumilio-RNA-binding-family-member-1			Hypo
Chr7	146401948	146403058	-0.412961	0.0131589	0.472415	Promoter-(2-3kb)	ENSMUSG00000015981	Stk32c	serine/threonine-kinase-32C			Hypo
Chr15	88384604	88385770	-0.485288	0.0132412	0.472415	Distal-Intergenic	NA	NA	NA			Hypo
Chr17	85259430	85260560	0.385908	0.0133112	0.472415	Distal-Intergenic	NA	NA	NA			Hyper
Chr13	59501482	59502866	-0.419517	0.0133358	0.472415	Distal-Intergenic	NA	NA	NA			Hypo
Chr1	161797717	161798721	-0.587576	0.0133514	0.472415	Exon-(uc007dea.2/21960,-exon-8-of-23)	ENSMUSG00000090394	4930523C07Rik	RIKEN-cDNA-4930523C07-gene			Hypo
Chr11	118771769	118772883	-0.425554	0.0133766	0.472415	Promoter-(<=1kb)	ENSMUSG00000025576	Rbfox3	RNA-binding-protein,-fox-1-homolog-(C.-elegans)-3			Hypo
Chr10	79659262	79660288	0.471301	0.0133805	0.472415	Distal-Intergenic	NA	NA	NA			Hyper
Chr16	17803318	17804383	0.501475	0.0133814	0.472415	Promoter-(<=1kb)	ENSMUSG00000012017	Scarf2	scavenger-receptor-class-F,-member-2			Hyper
Chr17	24793728	24794918	-0.459884	0.0133817	0.472415	Promoter-(<=1kb)	ENSMUSG00000071230	Npw	neuropeptide-W			Hypo
Chr3	138657576	138658700	0.435497	0.0134386	0.472415	Intron-(uc008rnr.1/229877,-intron-4-of-14)	ENSMUSG00000028149	Rap1gds1	RAP1,-GTP-GDP-dissociation-stimulator-1			Hyper
Chr9	115038805	115039856	-0.403767	0.0134569	0.472415	Intron-(uc009ryl.1/74486,-intron-4-of-11)	ENSMUSG00000040875	Osbpl10	oxysterol-binding-protein-like-10			Hypo
Chr15	27508815	27509843	0.375531	0.0134902	0.472415	Intron-(uc007vjo.2/11732,-intron-8-of-11)	ENSMUSG00000022265	Ank	progressive-ankylosis			Hyper
Chr6	49144850	49146211	-0.426606	0.0135323	0.472415	Intron-(uc009bwi.2/140488,-intron-2-of-14)	ENSMUSG00000029814	Igf2bp3	insulin-like-growth-factor-2-mRNA-binding-protein-3		yes	Hypo
Chr11	4156918	4158113	-0.452488	0.0135986	0.472415	Promoter-(<=1kb)	ENSMUSG00000034394	Lif	leukemia-inhibitory-factor		yes	Hypo
Chr11	3796258	3797794	-0.394634	0.0136022	0.472415	Promoter-(1-2kb)	ENSMUSG00000047205	Dusp18	dual-specificity-phosphatase-18			Hypo
Chr18	79064704	79065764	-0.516047	0.0136098	0.472415	Intron-(uc008fsi.2/240427,-intron-3-of-5)	ENSMUSG00000024548	Setbp1	SET-binding-protein-1	yes		Hypo
Chr5	67455147	67456175	-0.503337	0.0136175	0.472415	Distal-Intergenic	NA	NA	NA			Hypo
Chr7	20266063	20267166	0.456743	0.0136527	0.472415	Promoter-(<=1kb)	ENSMUSG00000074336	Apoc4	apolipoprotein-C-IV			Hyper
Chr9	34823845	34825013	0.419374	0.0136539	0.472415	Exon-(uc009osg.1/67703,-exon-10-of-14)	ENSMUSG00000070315	4930581F22Rik	RIKEN-cDNA-4930581F22-gene			Hyper
Chr16	23072634	23073654	-0.668042	0.0136625	0.472415	Exon-(uc007yta.1/16644,-exon-6-of-11)	ENSMUSG00000022875	Kng1	kininogen-1		yes	Hypo
Chr6	72763186	72764302	-0.467685	0.0136952	0.472415	Distal-Intergenic	NA	NA	NA			Hypo
Chr7	145130387	145131693	-0.416964	0.0137222	0.472415	Distal-Intergenic	NA	NA	NA			Hypo
Chr8	82167207	82168210	0.473158	0.0137324	0.472415	Exon-(uc009mir.1/73945,-exon-2-of-21)	ENSMUSG00000036990	Otud4	OTU-domain-containing-4			Hyper
Chr2	29115954	29117080	0.391406	0.0137561	0.472415	Distal-Intergenic	NA	NA	NA			Hyper
Chr5	130282455	130283826	0.480329	0.0138059	0.472415	Intron-(uc008zth.2/100678,-intron-3-of-7)	ENSMUSG00000029446	Psph	phosphoserine-phosphatase			Hyper
Chr15	88695080	88696350	-0.400078	0.0138336	0.472415	Promoter-(2-3kb)	ENSMUSG00000035828	Pim3	proviral-integration-site-3			Hypo
Chr7	117324794	117325864	0.547227	0.0138667	0.472415	Distal-Intergenic	NA	NA	NA			Hyper
Chr1	172999270	173000289	0.522815	0.0138699	0.472415	Distal-Intergenic	NA	NA	NA			Hyper
Chr2	24718326	24719458	-0.511494	0.0139072	0.472415	Exon-(uc008iph.2/77683,-exon-5-of-26)	ENSMUSG00000036893	Ehmt1	euchromatic-histone-methyltransferase-1	yes	yes	Hypo
Chr6	94645301	94646471	-0.424267	0.0139102	0.472415	Intron-(uc009czu.1/16206,-intron-1-of-18)	ENSMUSG00000030029	Lrig1	leucine-rich-repeats-and-immunoglobulin-like-domains-1			Hypo
Chr17	44894098	44895104	0.479578	0.0139218	0.472415	Intron-(uc008cqa.2/12393,-intron-1-of-7)	ENSMUSG00000038954	Supt3	suppressor-of-Ty-3			Hyper
Chr17	48763315	48764725	-0.471963	0.0140048	0.472415	Distal-Intergenic	NA	NA	NA			Hypo
Chr9	49433512	49434893	-0.439643	0.0140169	0.472415	Intron-(uc009pje.2/17967,-intron-1-of-18)	ENSMUSG00000039542	Ncam1	neural-cell-adhesion-molecule-1		yes	Hypo
Chr7	52968089	52969255	-0.354005	0.0140229	0.472415	Promoter-(1-2kb)	ENSMUSG00000057342	Sphk2	sphingosine-kinase-2		yes	Hypo
Chr2	75152838	75153844	-0.496073	0.0140375	0.472415	Distal-Intergenic	NA	NA	NA			Hypo
Chr1	23793878	23794955	-0.500308	0.0140555	0.472415	Intron-(uc007amd.1/280645,-intron-1-of-1)	ENSMUSG00000026156	B3gat2	beta-1,3-glucuronyltransferase-2-(glucuronosyltransferase-S)		yes	Hypo
Chr2	125679609	125680999	-0.407391	0.0141078	0.472415	Intron-(uc008mdb.1/12848,-intron-1-of-12)	ENSMUSG00000027206	Cops2	COP9-signalosome-subunit-2			Hypo
Chr15	10753009	10754263	-0.406079	0.0141626	0.472415	Distal-Intergenic	NA	NA	NA			Hypo
ChrX	91316382	91317583	0.566928	0.0141946	0.472415	Downstream-(2-3kb)	ENSMUSG00000079509	Zfx	zinc-finger-protein-X-linked			Hyper
Chr18	55079891	55081261	-0.385632	0.0142006	0.472415	Intron-(uc008eyc.2/269023,-intron-3-of-9)	ENSMUSG00000052713	Zfp608	zinc-finger-protein-608			Hypo
Chr8	124447143	124448484	0.36138	0.0142182	0.472415	Exon-(uc009nsf.1/12352,-exon-4-of-7)	NA	BC048644	cDNA-sequence-BC048644			Hyper
Chr2	51218933	51220107	-0.462107	0.014239	0.472415	Distal-Intergenic	NA	NA	NA			Hypo
Chr10	7990551	7991759	-0.480185	0.0142679	0.472415	Intron-(uc011xaa.1/338362,-intron-2-of-6)	ENSMUSG00000047712	Ust	uronyl-2-sulfotransferase		yes	Hypo
Chr9	111889725	111890864	0.563609	0.0142692	0.472415	Distal-Intergenic	NA	NA	NA			Hyper
Chr14	71113233	71114474	-0.570239	0.0142837	0.472415	Intron-(uc007uou.1/65246,-intron-1-of-27)	ENSMUSG00000022100	Xpo7	exportin-7			Hypo
Chr8	112398031	112399231	-0.441605	0.0142923	0.472415	Intron-(uc009njm.1/244650,-intron-1-of-3)	ENSMUSG00000031732	Phlpp2	PH-domain-and-leucine-rich-repeat-protein-phosphatase-2		yes	Hypo
Chr6	108453620	108454687	0.541999	0.0142989	0.472415	Intron-(uc009ddh.2/16438,-intron-53-of-61)	ENSMUSG00000030102	Itpr1	inositol-1,4,5-trisphosphate-receptor-1		yes	Hyper
Chr6	118914753	118915813	0.450236	0.0143731	0.473657	Intron-(uc009dlv.2/12288,-intron-1-of-45)	ENSMUSG00000051331	Cacna1c	calcium-channel,-voltage-dependent,-L-type,-alpha-1C-subunit	yes	yes	Hyper
Chr2	135026761	135028255	0.36792	0.014427	0.473657	Intron-(uc008mnw.2/18795,-intron-3-of-6)	ENSMUSG00000085631	9630028H03Rik	RIKEN-cDNA-9630028H03-gene			Hyper
Chr9	59522563	59523897	0.379605	0.0144487	0.473657	3'-UTR	ENSMUSG00000032294	Pkm	pyruvate-kinase,-muscle			Hyper
Chr6	5976988	5978119	-0.420121	0.0144654	0.473657	3'-UTR	ENSMUSG00000015112	Slc25a13	solute-carrier-family-25-(mitochondrial-carrier,-adenine-nucleotide-translocator),-member-13		yes	Hypo
Chr7	74224322	74225831	-0.376173	0.0145844	0.473657	Intron-(uc009hhx.1/233332,-intron-19-of-22)	ENSMUSG00000043831	Lysmd4	LysM,-putative-peptidoglycan-binding,-domain-containing-4		yes	Hypo
Chr4	134281072	134282219	0.398381	0.0146338	0.473657	Distal-Intergenic	NA	NA	NA			Hyper
Chr4	139975145	139976403	-0.432459	0.0146766	0.473657	Distal-Intergenic	NA	NA	NA			Hypo
Chr10	40915430	40916888	0.41922	0.014712	0.473657	Intron-(uc007exk.1/103199,-intron-22-of-22)	ENSMUSG00000038417	Fig4	FIG4-phosphoinositide-5-phosphatase			Hyper
Chr7	145392217	145393610	-0.525466	0.0147418	0.473657	Distal-Intergenic	NA	NA	NA			Hypo
Chr14	49761297	49762317	0.580851	0.0147555	0.473657	Distal-Intergenic	NA	NA	NA			Hyper
Chr4	119500885	119501957	0.463332	0.0147874	0.473657	Intron-(uc008umx.1/16656,-intron-3-of-3)	ENSMUSG00000028634	Hivep3	human-immunodeficiency-virus-type-I-enhancer-binding-protein-3	yes		Hyper
Chr5	123213129	123214502	-0.298186	0.0148377	0.473657	5'-UTR	ENSMUSG00000029471	Camkk2	calcium/calmodulin-dependent-protein-kinase-kinase-2,-beta		yes	Hypo
Chr10	24098413	24099697	0.615061	0.0148447	0.473657	Distal-Intergenic	NA	NA	NA			Hyper
Chr6	72606020	72607066	0.338894	0.014845	0.473657	Intron-(uc009ciz.1/21415,-intron-3-of-12)	ENSMUSG00000056429	Tgoln1	trans-golgi-network-protein			Hyper
Chr10	95794027	95795060	-0.425478	0.0149259	0.473657	Distal-Intergenic	NA	NA	NA			Hypo
Chr10	44440965	44442098	0.514474	0.0149327	0.473657	Distal-Intergenic	NA	NA	NA			Hyper
Chr9	50340985	50342041	-0.528455	0.0149385	0.473657	3'-UTR	ENSMUSG00000032067	Pts	6-pyruvoyl-tetrahydropterin-synthase		yes	Hypo
Chr11	100486841	100487899	0.420827	0.0149506	0.473657	Promoter-(2-3kb)	ENSMUSG00000017837	Nkiras2	NFKB-inhibitor-interacting-Ras-like-protein-2			Hyper
Chr15	27965189	27966370	0.48754	0.0149867	0.473657	Distal-Intergenic	NA	NA	NA			Hyper
Chr2	113283891	113285283	0.462703	0.0149883	0.473657	Promoter-(2-3kb)	ENSMUSG00000044042	Fmn1	formin-1		yes	Hyper
Chr15	37059761	37060809	-0.485755	0.0150095	0.473657	Distal-Intergenic	NA	NA	NA			Hypo
Chr9	68803358	68804662	-0.440196	0.0150368	0.473657	Intron-(uc009qmx.1/19883,-intron-1-of-10)	NA	9530091C08Rik	RIKEN-cDNA-9530091C08-gene			Hypo
Chr13	46138415	46139605	-0.45834	0.0150475	0.473657	Distal-Intergenic	NA	NA	NA			Hypo
Chr15	12606287	12607710	0.398823	0.0150918	0.473657	Intron-(uc007vhu.1/68070,-intron-2-of-3)	ENSMUSG00000022197	Pdzd2	PDZ-domain-containing-2		yes	Hyper
Chr1	12798149	12799204	0.481699	0.015096	0.473657	Intron-(uc007aia.2/240725,-intron-7-of-21)	ENSMUSG00000016918	Sulf1	sulfatase-1			Hyper
Chr5	132875790	132876900	-0.381431	0.0151041	0.473657	Intron-(uc008zuv.1/319974,-intron-1-of-19)	ENSMUSG00000029673	Auts2	autism-susceptibility-candidate-2	yes	yes	Hypo
Chr15	102499703	102500838	-0.401202	0.0151249	0.473657	Promoter-(<=1kb)	ENSMUSG00000062683	Atp5g2	ATP-synthase,-H+-transporting,-mitochondrial-F0-complex,-subunit-C2-(subunit-9)			Hypo
Chr15	93066506	93067963	-0.416718	0.0151586	0.473657	Downstream-(2-3kb)	ENSMUSG00000036197	Gxylt1	glucoside-xylosyltransferase-1			Hypo
Chr3	123207408	123208702	0.403368	0.0152766	0.473657	Promoter-(2-3kb)	ENSMUSG00000104960	Snhg8	small-nucleolar-RNA-host-gene-8			Hyper
Chr7	73136269	73137307	0.398384	0.0153169	0.473657	Intron-(uc009hgw.2/18553,-intron-13-of-20)	ENSMUSG00000030512	Snrpa1	small-nuclear-ribonucleoprotein-polypeptide-A'			Hyper
Chr9	56003297	56004622	-0.427516	0.0153191	0.473657	Intron-(uc009psw.1/56434,-intron-1-of-7)	ENSMUSG00000032324	Tspan3	tetraspanin-3			Hypo
Chr6	125040590	125041630	0.454605	0.0153424	0.473657	Distal-Intergenic	NA	NA	NA			Hyper
Chr12	76487407	76489075	0.360229	0.015357	0.473657	Intron-(uc007nxa.1/80837,-intron-2-of-4)	ENSMUSG00000048982	Gphb5	glycoprotein-hormone-beta-5			Hyper
Chr9	109995130	109996311	0.570512	0.0153718	0.473657	Exon-(uc009rtg.1/72831,-exon-4-of-19)	ENSMUSG00000032480	Dhx30	DEAH-(Asp-Glu-Ala-His)-box-polypeptide-30			Hyper
Chr3	146038787	146040205	0.335946	0.0153744	0.473657	Promoter-(1-2kb)	ENSMUSG00000105602	Gm10636	predicted-gene-10636			Hyper
Chr2	20770192	20771815	-0.322875	0.0153871	0.473657	3'-UTR	ENSMUSG00000036591	Arhgap21	Rho-GTPase-activating-protein-21		yes	Hypo
Chr6	35279843	35280884	-0.408936	0.0153975	0.473657	Exon-(uc009bis.1/uc009bis.1,-exon-1-of-3)	ENSMUSG00000047420	Fam180a	family-with-sequence-similarity-180,-member-A			Hypo
Chr1	135112069	135113333	0.382282	0.0154463	0.473657	Distal-Intergenic	NA	NA	NA			Hyper
Chr4	153333611	153334693	-0.351476	0.0154493	0.473657	Promoter-(2-3kb)	ENSMUSG00000047613	A430005L14Rik	RIKEN-cDNA-A430005L14-gene			Hypo
Chr13	13621089	13622103	0.512318	0.0154561	0.473657	Distal-Intergenic	NA	NA	NA			Hyper
Chr17	56389603	56390627	-0.6165	0.0154712	0.473657	Distal-Intergenic	NA	NA	NA			Hypo
Chr10	58866139	58867208	0.435256	0.0155317	0.473979	Promoter-(<=1kb)	ENSMUSG00000009646	Pla2g12b	phospholipase-A2,-group-XIIB			Hyper
Chr5	113509650	113510687	0.37523	0.0155371	0.473979	Promoter-(<=1kb)	ENSMUSG00000029352	Crybb3	crystallin,-beta-B3			Hyper
Chr12	12892793	12894017	-0.394684	0.015598	0.474658	Distal-Intergenic	NA	NA	NA			Hypo
Chr13	51267032	51268281	-0.396271	0.0156148	0.474658	Promoter-(<=1kb)	ENSMUSG00000021396	Nxnl2	nucleoredoxin-like-2			Hypo
Chr9	70459987	70461034	0.466668	0.0156709	0.474744	Intron-(uc009qon.1/235461,-intron-6-of-8)	ENSMUSG00000042444	Mindy2	MINDY-lysine-48-deubiquitinase-2			Hyper
Chr17	13966398	13967536	0.612808	0.0156902	0.474744	Exon-(uc008amr.1/17356,-exon-11-of-33)	ENSMUSG00000068036	Afdn	afadin,-adherens-junction-formation-factor			Hyper
Chr14	62841220	62842234	-0.44709	0.015723	0.474744	Distal-Intergenic	NA	NA	NA			Hypo
Chr10	76784282	76785335	-0.381398	0.0157286	0.474744	5'-UTR	ENSMUSG00000020262	Adarb1	adenosine-deaminase,-RNA-specific,-B1		yes	Hypo
Chr12	17716560	17717811	0.343155	0.0157641	0.474745	Intron-(uc007ncw.1/53602,-intron-1-of-2)	ENSMUSG00000071379	Hpcal1	hippocalcin-like-1			Hyper
Chr18	65042727	65044433	0.393098	0.0158096	0.474745	Promoter-(2-3kb)	ENSMUSG00000024589	Nedd4l	neural-precursor-cell-expressed,-developmentally-down-regulated-gene-4-like		yes	Hyper
Chr9	96253510	96255114	0.314662	0.0158435	0.474745	Intron-(uc009rck.1/11933,-intron-1-of-6)	ENSMUSG00000032412	Atp1b3	ATPase,-Na+/K+-transporting,-beta-3-polypeptide			Hyper
Chr1	24684018	24685094	0.557266	0.0158502	0.474745	Promoter-(<=1kb)	ENSMUSG00000073725	Lmbrd1	LMBR1-domain-containing-1			Hyper
Chr5	36881757	36883337	0.443422	0.0158674	0.474745	Intron-(uc008xet.1/100855,-intron-3-of-11)	ENSMUSG00000029192	Tbc1d14	TBC1-domain-family,-member-14			Hyper
Chr8	108966730	108967753	0.502083	0.0159482	0.475548	Distal-Intergenic	NA	NA	NA			Hyper
Chr12	81905725	81906737	0.499585	0.0159752	0.475548	Intron-(uc007obi.1/217684,-intron-1-of-5)	ENSMUSG00000021133	Susd6	sushi-domain-containing-6			Hyper
Chr6	146217828	146219159	-0.380786	0.0159877	0.475548	Intron-(uc009erw.1/16439,-intron-37-of-56)	ENSMUSG00000030287	Itpr2	inositol-1,4,5-triphosphate-receptor-2		yes	Hypo
Chr4	58572850	58574192	0.470713	0.0160278	0.475548	Distal-Intergenic	NA	NA	NA			Hyper
Chr14	80384640	80385741	-0.533095	0.0160725	0.475548	Distal-Intergenic	NA	NA	NA			Hypo
Chr18	21306107	21307720	-0.320931	0.0161277	0.475548	Exon-(uc008efg.1/381126,-exon-4-of-6)	ENSMUSG00000024313	Mep1b	meprin-1-beta			Hypo
Chr12	53448010	53449145	0.504753	0.0161662	0.475548	Distal-Intergenic	NA	NA	NA			Hyper
Chr16	17054002	17055053	-0.458	0.0161782	0.475548	Distal-Intergenic	NA	NA	NA			Hypo
Chr17	81844266	81845792	0.383781	0.0161787	0.475548	Promoter-(<=1kb)	ENSMUSG00000054640	Slc8a1	solute-carrier-family-8-(sodium/calcium-exchanger),-member-1		yes	Hyper
Chr11	7403870	7404994	-0.621263	0.0161811	0.475548	Distal-Intergenic	NA	NA	NA			Hypo
Chr4	122548320	122549448	0.439869	0.0161999	0.475548	5'-UTR	ENSMUSG00000028656	Cap1	CAP,-adenylate-cyclase-associated-protein-1-(yeast)		yes	Hyper
Chr4	150517535	150518645	0.46315	0.016252	0.476153	Exon-(uc008vyn.2/100072,-exon-9-of-24)	ENSMUSG00000014592	Camta1	calmodulin-binding-transcription-activator-1			Hyper
Chr1	193732396	193733878	-0.325989	0.0162761	0.476153	Promoter-(<=1kb)	ENSMUSG00000055833	1700034H15Rik	RIKEN-cDNA-1700034H15-gene			Hypo
Chr1	89798973	89800022	-0.49355	0.0163367	0.477111	Intron-(uc011wos.1/227333,-intron-3-of-29)	ENSMUSG00000070738	Dgkd	diacylglycerol-kinase,-delta			Hypo
Chr15	72881946	72883148	0.369044	0.0165116	0.480769	Exon-(uc007wbl.2/76510,-exon-2-of-22)	ENSMUSG00000047921	Trappc9	trafficking-protein-particle-complex-9			Hyper
Chr9	62311981	62313429	-0.361384	0.0165271	0.480769	Intron-(uc009qaj.1/235431,-intron-2-of-11)	ENSMUSG00000041729	Coro2b	coronin,-actin-binding-protein,-2B		yes	Hypo
Chr16	22254065	22255664	0.3925	0.0165828	0.480769	5'-UTR	ENSMUSG00000022858	Tra2b	transformer-2-beta			Hyper
Chr8	26167363	26168780	-0.384093	0.0165849	0.480769	Exon-(uc009lfq.2/83436,-exon-8-of-12)	ENSMUSG00000037406	Htra4	HtrA-serine-peptidase-4		yes	Hypo
Chr13	49005076	49006095	-0.511515	0.0166273	0.480769	Exon-(uc007qio.1/218236,-exon-10-of-18)	ENSMUSG00000038025	Phf2	PHD-finger-protein-2	yes		Hypo
Chr8	4355671	4356910	0.430379	0.0166306	0.480769	Intron-(uc009ktv.1/20300,-intron-4-of-5)	ENSMUSG00000023235	Ccl25	chemokine-(C-C-motif)-ligand-25			Hyper
Chr7	133319145	133320180	0.497636	0.0166767	0.48129	Intron-(uc009jqr.1/74204,-intron-1-of-23)	ENSMUSG00000000131	Xpo6	exportin-6			Hyper
Chr8	72841877	72842910	-0.517736	0.0167881	0.48368	Promoter-(2-3kb)	ENSMUSG00000087408	Cers1	ceramide-synthase-1			Hypo
Chr9	120076981	120077991	-0.411284	0.0168434	0.48368	3'-UTR	ENSMUSG00000032517	Mobp	myelin-associated-oligodendrocytic-basic-protein		yes	Hypo
Chr9	24304920	24306017	-0.49828	0.0168674	0.48368	Promoter-(1-2kb)	ENSMUSG00000043067	Dpy19l1	dpy-19-like-1-(C.-elegans)			Hypo
Chr10	79703761	79705043	-0.336756	0.0168938	0.48368	Exon-(uc007gch.1/68114,-exon-12-of-14)	ENSMUSG00000020153	Ndufs7	NADH-dehydrogenase-(ubiquinone)-Fe-S-protein-7		yes	Hypo
Chr12	53993446	53995413	0.362178	0.0169323	0.48368	Intron-(uc007nnm.1/238161,-intron-4-of-13)	ENSMUSG00000061603	Akap6	A-kinase-(PRKA)-anchor-protein-6		yes	Hyper
Chr3	45101024	45102041	0.539941	0.0169607	0.48368	Intron-(uc008pcx.1/uc008pcx.1,-intron-6-of-8)	ENSMUSG00000049100	Pcdh10	protocadherin-10		yes	Hyper
Chr5	149364826	149366009	0.437759	0.0170145	0.48368	Promoter-(<=1kb)	ENSMUSG00000001687	Ubl3	ubiquitin-like-3			Hyper
Chr5	116703047	116704230	0.598501	0.017115	0.48368	Intron-(uc008zey.1/269693,-intron-1-of-13)	ENSMUSG00000043913	Ccdc60	coiled-coil-domain-containing-60		yes	Hyper
Chr11	116308563	116310057	-0.385975	0.0171152	0.48368	Exon-(uc007mlc.1/217341,-exon-3-of-14)	ENSMUSG00000070331	Qrich2	glutamine-rich-2			Hypo
Chr9	100945677	100946941	0.46957	0.0171719	0.48368	Distal-Intergenic	NA	NA	NA			Hyper
Chr5	32502640	32503720	0.519139	0.0171742	0.48368	Distal-Intergenic	NA	NA	NA			Hyper
Chr5	135727401	135728443	-0.55288	0.0171862	0.48368	Promoter-(<=1kb)	ENSMUSG00000049551	Fzd9	frizzled-class-receptor-9			Hypo
Chr6	53402353	53403500	-0.369001	0.0172315	0.48368	Intron-(uc009bzf.2/320189,-intron-4-of-5)	ENSMUSG00000053007	Creb5	cAMP-responsive-element-binding-protein-5			Hypo
Chr12	80981292	80982711	-0.394924	0.0173009	0.48368	Distal-Intergenic	NA	NA	NA			Hypo
Chr17	28641201	28642539	0.357885	0.0173266	0.48368	Intron-(uc008bra.2/14229,-intron-2-of-13)	ENSMUSG00000024222	Fkbp5	FK506-binding-protein-5		yes	Hyper
Chr1	154617355	154618477	-0.41925	0.0173361	0.48368	Promoter-(1-2kb)	ENSMUSG00000008475	Arpc5	actin-related-protein-2/3-complex,-subunit-5			Hypo
Chr3	29855568	29856694	-0.493199	0.0173383	0.48368	Exon-(uc008oun.2/14013,-exon-12-of-13)	ENSMUSG00000027684	Mecom	MDS1-and-EVI1-complex-locus		yes	Hypo
Chr4	130952716	130953986	-0.330333	0.0173409	0.48368	Distal-Intergenic	NA	NA	NA			Hypo
Chr16	30638242	30639446	-0.496336	0.0173436	0.48368	Distal-Intergenic	NA	NA	NA			Hypo
Chr6	85953177	85954227	0.472666	0.0173622	0.48368	Distal-Intergenic	NA	NA	NA			Hyper
Chr19	9062360	9063859	-0.461946	0.0174207	0.48368	Promoter-(<=1kb)	ENSMUSG00000069833	Ahnak	AHNAK-nucleoprotein-(desmoyokin)			Hypo
Chr13	52014083	52015293	-0.335128	0.0174589	0.48368	Distal-Intergenic	NA	NA	NA			Hypo
Chr6	108657995	108659205	-0.417617	0.0174639	0.48368	Distal-Intergenic	NA	NA	NA			Hypo
Chr19	29968167	29969410	0.58135	0.0174865	0.48368	Distal-Intergenic	NA	NA	NA			Hyper
Chr19	4312925	4314250	-0.464683	0.0174954	0.48368	Downstream-(1-2kb)	ENSMUSG00000024858	Grk2	G-protein-coupled-receptor-kinase-2			Hypo
Chr8	120330113	120331254	-0.414846	0.0174968	0.48368	Distal-Intergenic	NA	NA	NA			Hypo
Chr2	38039741	38040912	0.438903	0.0175226	0.48368	Intron-(uc008jng.2/227801,-intron-2-of-21)	ENSMUSG00000035392	Dennd1a	DENN/MADD-domain-containing-1A			Hyper
Chr7	151797024	151798178	-0.394651	0.0176811	0.4839	Exon-(uc009kqm.1/101772,-exon-16-of-25)	ENSMUSG00000031077	Fadd	Fas-(TNFRSF6)-associated-via-death-domain			Hypo
Chr4	135046270	135047605	-0.366279	0.0176823	0.4839	Promoter-(2-3kb)	ENSMUSG00000028803	Nipal3	NIPA-like-domain-containing-3			Hypo
Chr17	63730368	63731649	-0.499125	0.0177247	0.4839	Intron-(uc008dfj.2/50758,-intron-2-of-5)	ENSMUSG00000023965	Fbxl17	F-box-and-leucine-rich-repeat-protein-17			Hypo
Chr14	70104979	70107012	0.42289	0.0178097	0.4839	Promoter-(<=1kb)	ENSMUSG00000034194	R3hcc1	R3H-domain-and-coiled-coil-containing-1			Hyper
Chr1	185843963	185845023	-0.556436	0.0178101	0.4839	Distal-Intergenic	NA	NA	NA			Hypo
Chr14	76181295	76182485	0.388062	0.0178117	0.4839	Intron-(uc007uqx.1/67554,-intron-1-of-9)	ENSMUSG00000022003	Slc25a30	solute-carrier-family-25,-member-30			Hyper
Chr9	94705586	94706622	0.537068	0.0178159	0.4839	Intron-(uc009ray.2/331004,-intron-4-of-15)	ENSMUSG00000031129	Slc9a9	solute-carrier-family-9-(sodium/hydrogen-exchanger),-member-9		yes	Hyper
Chr6	126713760	126715082	-0.491188	0.0178251	0.4839	Distal-Intergenic	NA	NA	NA			Hypo
Chr9	98889946	98890951	0.403991	0.0178447	0.4839	Intron-(uc009rds.1/23873,-intron-1-of-2)	ENSMUSG00000032463	Faim	Fas-apoptotic-inhibitory-molecule			Hyper
Chr1	186752536	186754027	0.523081	0.0178549	0.4839	Exon-(uc007dyt.2/226778,-exon-4-of-18)	ENSMUSG00000039349	C130074G19Rik	RIKEN-cDNA-C130074G19-gene			Hyper
Chr1	172836067	172837304	0.420649	0.0178562	0.4839	Downstream-(<1kb)	ENSMUSG00000070524	Fcrlb	Fc-receptor-like-B			Hyper
Chr3	102479953	102481009	0.435177	0.0178883	0.4839	Distal-Intergenic	NA	NA	NA			Hyper
Chr13	97285912	97287667	0.363243	0.0178982	0.4839	Promoter-(1-2kb)	ENSMUSG00000021668	Polk	polymerase-(DNA-directed),-kappa			Hyper
Chr13	111169125	111170148	0.459471	0.0179402	0.483912	Distal-Intergenic	NA	NA	NA			Hyper
Chr4	123976598	123977819	0.43862	0.0179551	0.483912	Exon-(uc008uqo.1/uc008uqo.1,-exon-1-of-4)	ENSMUSG00000090125	Pou3f1	POU-domain,-class-3,-transcription-factor-1		yes	Hyper
Chr10	68209965	68211448	-0.430065	0.0180789	0.48488	5'-UTR	ENSMUSG00000060044	Tmem26	transmembrane-protein-26			Hypo
Chr14	64114243	64115438	0.570853	0.0181078	0.48488	Exon-(uc007uhs.1/58865,-exon-5-of-9)	ENSMUSG00000021953	Tdh	L-threonine-dehydrogenase			Hyper
Chr2	113204257	113206291	-0.333816	0.0181125	0.48488	Promoter-(<=1kb)	ENSMUSG00000044042	Fmn1	formin-1		yes	Hypo
Chr14	62981234	62982662	-0.409407	0.0181346	0.48488	Intron-(uc007ugl.1/67153,-intron-7-of-10)	ENSMUSG00000021932	Rnaseh2b	ribonuclease-H2,-subunit-B			Hypo
Chr4	115743251	115744291	0.552233	0.0181896	0.48488	Exon-(uc008ufv.1/66576,-exon-2-of-4)	ENSMUSG00000063882	Uqcrh	ubiquinol-cytochrome-c-reductase-hinge-protein			Hyper
Chr10	127719722	127721538	0.379173	0.0181938	0.48488	Promoter-(<=1kb)	ENSMUSG00000040033	Stat2	signal-transducer-and-activator-of-transcription-2			Hyper
Chr10	119740659	119741959	-0.470436	0.018203	0.48488	Distal-Intergenic	NA	NA	NA			Hypo
Chr12	84429686	84430907	0.405239	0.0182931	0.48488	Intron-(uc007odc.1/70127,-intron-4-of-10)	ENSMUSG00000021221	Dpf3	D4,-zinc-and-double-PHD-fingers,-family-3			Hyper
Chr11	60723319	60724750	0.368928	0.0183277	0.48488	Promoter-(2-3kb)	ENSMUSG00000018931	Natd1	N-acetyltransferase-domain-containing-1			Hyper
Chr12	5556213	5557429	0.430421	0.018367	0.48488	Distal-Intergenic	NA	NA	NA			Hyper
Chr10	68796008	68797269	0.327035	0.0184344	0.48488	Downstream-(2-3kb)	ENSMUSG00000019942	Cdk1	cyclin-dependent-kinase-1		yes	Hyper
Chr5	136278050	136279923	-0.434486	0.0184409	0.48488	Promoter-(2-3kb)	ENSMUSG00000039860	Srrm3	serine/arginine-repetitive-matrix-3			Hypo
Chr14	12251335	12252391	0.466216	0.018445	0.48488	Distal-Intergenic	NA	NA	NA			Hyper
Chr12	54926214	54927395	0.486827	0.0184986	0.48488	Intron-(uc007nno.1/27386,-intron-4-of-11)	ENSMUSG00000035105	Egln3	egl-9-family-hypoxia-inducible-factor-3		yes	Hyper
Chr3	52323473	52324558	0.412886	0.0185339	0.48488	Intron-(uc008pej.1/uc008pej.1,-intron-1-of-4)	ENSMUSG00000044167	Foxo1	forkhead-box-O1		yes	Hyper
Chr11	76513125	76514461	-0.334595	0.018555	0.48488	Distal-Intergenic	NA	NA	NA			Hypo
Chr19	58408967	58410031	-0.405293	0.0185564	0.48488	Intron-(uc008iak.1/14585,-intron-4-of-9)	ENSMUSG00000025089	Gfra1	glial-cell-line-derived-neurotrophic-factor-family-receptor-alpha-1		yes	Hypo
Chr7	24990501	24992677	0.344351	0.0186267	0.48488	Promoter-(<=1kb)	ENSMUSG00000087598	Zfp111	zinc-finger-protein-111			Hyper
Chr10	109173755	109174898	-0.53226	0.0186499	0.48488	Exon-(uc007gzk.1/260315,-exon-13-of-28)	ENSMUSG00000020181	Nav3	neuron-navigator-3			Hypo
Chr8	3219549	3220597	0.429192	0.0186533	0.48488	Intron-(uc009krc.2/16337,-intron-1-of-19)	ENSMUSG00000005534	Insr	insulin-receptor		yes	Hyper
Chr15	37366509	37367551	0.426361	0.0186804	0.48488	Intron-(uc007vng.2/52589,-intron-2-of-4)	ENSMUSG00000051359	Ncald	neurocalcin-delta			Hyper
Chr1	164473928	164475047	-0.406268	0.0187421	0.48488	3'-UTR	ENSMUSG00000026694	Mettl13	methyltransferase-like-13			Hypo
Chr2	91351336	91352342	-0.404014	0.0188008	0.48488	3'-UTR	ENSMUSG00000040549	Ckap5	cytoskeleton-associated-protein-5		yes	Hypo
Chr7	25444326	25445477	-0.582231	0.018814	0.48488	Promoter-(<=1kb)	ENSMUSG00000108470	Gm4598	predicted-gene-4598			Hypo
Chr9	13951380	13952397	0.510931	0.0188484	0.48488	Distal-Intergenic	NA	NA	NA			Hyper
Chr5	77354304	77355364	-0.406818	0.0188626	0.48488	5'-UTR	ENSMUSG00000055923	Aasdh	aminoadipate-semialdehyde-dehydrogenase			Hypo
Chr10	74708128	74709310	0.320405	0.0188699	0.48488	Exon-(uc007fqe.2/74392,-exon-4-of-16)	ENSMUSG00000033444	Specc1l	sperm-antigen-with-calponin-homology-and-coiled-coil-domains-1-like			Hyper
Chr17	29172856	29174066	0.517014	0.0188988	0.48488	5'-UTR	ENSMUSG00000071172	Srsf3	serine/arginine-rich-splicing-factor-3		yes	Hyper
Chr9	77656227	77657232	0.46832	0.0189057	0.48488	Distal-Intergenic	NA	NA	NA			Hyper
Chr2	4125938	4127519	0.345314	0.0189192	0.48488	Intron-(uc008ieo.2/209630,-intron-1-of-22)	ENSMUSG00000026657	Frmd4a	FERM-domain-containing-4A		yes	Hyper
Chr2	18293532	18294777	0.396801	0.018961	0.48488	Intron-(uc008ilt.2/13418,-intron-1-of-12)	ENSMUSG00000026740	Dnajc1	DnaJ-heat-shock-protein-family-(Hsp40)-member-C1		yes	Hyper
Chr6	29327548	29329193	-0.350786	0.0189688	0.48488	Promoter-(1-2kb)	ENSMUSG00000058831	Opn1sw	opsin-1-(cone-pigments),-short-wave-sensitive-(color-blindness,-tritan)			Hypo
Chr10	120170339	120171536	-0.478159	0.018994	0.48488	Distal-Intergenic	NA	NA	NA			Hypo
Chr18	57867352	57868662	0.428935	0.0189978	0.48488	Intron-(uc008ezg.2/75444,-intron-6-of-6)	ENSMUSG00000086607	4930511M06Rik	RIKEN-cDNA-4930511M06-gene			Hyper
Chr2	160237912	160239570	-0.4253	0.0190078	0.48488	Distal-Intergenic	NA	NA	NA			Hypo
Chr14	51743169	51744380	-0.464169	0.019011	0.48488	Distal-Intergenic	NA	NA	NA			Hypo
Chr18	82859074	82860229	0.387688	0.0191554	0.486335	Promoter-(1-2kb)	ENSMUSG00000041258	Zfp236	zinc-finger-protein-236			Hyper
Chr7	13627411	13629414	-0.314458	0.0191571	0.486335	3'-UTR	ENSMUSG00000005575	Ube2m	ubiquitin-conjugating-enzyme-E2M			Hypo
Chr9	122148520	122149584	0.41051	0.019186	0.486335	Intron-(uc009ser.1/102566,-intron-11-of-12)	ENSMUSG00000037949	Ano10	anoctamin-10			Hyper
Chr3	130463683	130464909	-0.445943	0.0191885	0.486335	Distal-Intergenic	NA	NA	NA			Hypo
Chr8	13196183	13197284	0.401021	0.0192101	0.486335	Intron-(uc009kxd.1/66790,-intron-2-of-7)	ENSMUSG00000038515	Grtp1	GH-regulated-TBC-protein-1			Hyper
Chr4	134587714	134588744	0.488667	0.0192807	0.4874	Distal-Intergenic	NA	NA	NA			Hyper
Chr14	21528970	21531372	-0.298495	0.0193489	0.487569	Promoter-(<=1kb)	ENSMUSG00000021819	Zswim8	zinc-finger-SWIM-type-containing-8			Hypo
Chr1	43147421	43148879	0.393642	0.0193625	0.487569	Promoter-(<=1kb)	ENSMUSG00000070939	Tgfbrap1	transforming-growth-factor,-beta-receptor-associated-protein-1			Hyper
Chr9	96862307	96863400	-0.393546	0.0193729	0.487569	Intron-(uc009rcx.1/211949,-intron-2-of-2)	ENSMUSG00000046997	Spsb4	splA/ryanodine-receptor-domain-and-SOCS-box-containing-4			Hypo
Chr3	144510285	144511286	-0.482149	0.0194027	0.487604	Promoter-(<=1kb)	ENSMUSG00000037033	Clca3b	chloride-channel-accessory-3B			Hypo
Chr3	144175968	144177263	0.384594	0.0195625	0.49008	Intron-(uc012cyx.1/23908,-intron-1-of-6)	ENSMUSG00000040151	Hs2st1	heparan-sulfate-2-O-sulfotransferase-1			Hyper
Chr5	149291666	149292707	-0.410802	0.01958	0.49008	Distal-Intergenic	NA	NA	NA			Hypo
Chr17	49662682	49664132	-0.321393	0.0196259	0.49008	Intron-(uc008cyl.1/76441,-intron-1-of-25)	ENSMUSG00000040260	Daam2	dishevelled-associated-activator-of-morphogenesis-2			Hypo
Chr17	10405717	10407060	-0.475852	0.0196325	0.49008	3'-UTR	ENSMUSG00000062078	Qk	quaking			Hypo
Chr6	137592805	137594198	0.364285	0.0196746	0.49008	Promoter-(2-3kb)	ENSMUSG00000015766	Eps8	epidermal-growth-factor-receptor-pathway-substrate-8			Hyper
Chr9	110729251	110730440	0.3853	0.0196791	0.49008	Promoter-(<=1kb)	ENSMUSG00000058398	Prss43	protease,-serine-43			Hyper
Chr17	35105940	35107418	0.468846	0.0197206	0.49008	Promoter-(1-2kb)	ENSMUSG00000091971	Hspa1a	heat-shock-protein-1A			Hyper
Chr14	57373952	57375034	-0.469243	0.0197303	0.49008	Intron-(uc007ucj.1/66645,-intron-5-of-8)	ENSMUSG00000021938	Pspc1	paraspeckle-protein-1		yes	Hypo
Chr10	41240667	41241946	0.467006	0.0197743	0.490461	Promoter-(1-2kb)	ENSMUSG00000019818	Cd164	CD164-antigen			Hyper
Chr2	35879967	35881096	0.453296	0.0198371	0.490784	Distal-Intergenic	NA	NA	NA			Hyper
Chr1	95600758	95602018	-0.472253	0.0199021	0.490784	3'-UTR	ENSMUSG00000026278	Bok	BCL2-related-ovarian-killer		yes	Hypo
Chr2	72189330	72190638	-0.381497	0.0199054	0.490784	Intron-(uc008kbs.2/65964,-intron-2-of-9)	ENSMUSG00000004085	Map3k20	mitogen-activated-protein-kinase-kinase-kinase-20			Hypo
Chr1	195443621	195445015	-0.404301	0.0199148	0.490784	Distal-Intergenic	NA	NA	NA			Hypo
Chr2	51926441	51927551	0.535161	0.0199308	0.490784	Promoter-(<=1kb)	ENSMUSG00000036202	Rif1	replication-timing-regulatory-factor-1			Hyper
Chr13	45314380	45315482	-0.508442	0.0199831	0.491366	Distal-Intergenic	NA	NA	NA			Hypo
Chr8	92814048	92815128	-0.443315	0.0200278	0.491758	Intron-(uc009msb.2/244579,-intron-1-of-6)	ENSMUSG00000043668	Tox3	TOX-high-mobility-group-box-family-member-3		yes	Hypo
Chr1	39711458	39712468	-0.570609	0.020088	0.492222	Distal-Intergenic	NA	NA	NA			Hypo
Chr4	153519203	153520402	-0.416256	0.0201042	0.492222	Promoter-(2-3kb)	ENSMUSG00000029029	Wrap73	WD-repeat-containing,-antisense-to-Trp73			Hypo
Chr10	84505850	84506922	-0.465509	0.0202254	0.492496	Distal-Intergenic	NA	NA	NA			Hypo
Chr4	9508445	9509888	0.455011	0.0202266	0.492496	Intron-(uc008ryf.2/65973,-intron-13-of-23)	ENSMUSG00000028207	Asph	aspartate-beta-hydroxylase		yes	Hyper
Chr16	22478839	22479991	-0.443515	0.0202584	0.492496	Exon-(uc007ysg.2/110197,-exon-24-of-25)	ENSMUSG00000013089	Etv5	ets-variant-5		yes	Hypo
Chr17	5842864	5844116	0.455794	0.0202741	0.492496	Promoter-(1-2kb)	ENSMUSG00000002365	Snx9	sorting-nexin-9			Hyper
Chr7	25817311	25818330	0.382276	0.020302	0.492496	Intron-(uc009frh.2/14809,-intron-12-of-19)	ENSMUSG00000040907	Atp1a3	ATPase,-Na+/K+-transporting,-alpha-3-polypeptide		yes	Hyper
Chr4	52731754	52732781	-0.512022	0.020308	0.492496	Distal-Intergenic	NA	NA	NA			Hypo
Chr5	126567530	126568719	-0.464781	0.0203452	0.492496	Distal-Intergenic	NA	NA	NA			Hypo
Chr8	113480222	113482060	0.321779	0.0203889	0.492496	5'-UTR	ENSMUSG00000031749	St3gal2	ST3-beta-galactoside-alpha-2,3-sialyltransferase-2			Hyper
Chr5	124020649	124021678	0.392194	0.0204223	0.492496	Promoter-(1-2kb)	ENSMUSG00000029434	Vps33a	VPS33A-CORVET/HOPS-core-subunit			Hyper
Chr6	128414806	128415996	-0.414656	0.0204415	0.492496	Intron-(uc009eds.2/791299,-intron-2-of-2)	ENSMUSG00000059659	Gm10069	predicted-gene-10069			Hypo
Chr10	61328591	61330207	-0.429509	0.0204583	0.492496	Exon-(uc007fgn.1/12817,-exon-26-of-41)	ENSMUSG00000058806	Col13a1	collagen,-type-XIII,-alpha-1			Hypo
Chr2	119146183	119147631	-0.363841	0.0204607	0.492496	Exon-(uc008ltq.1/100043609,-exon-4-of-4)	ENSMUSG00000027314	Dll4	delta-like-canonical-Notch-ligand-4			Hypo
Chr1	82285233	82286564	-0.365075	0.0206089	0.49273	Promoter-(1-2kb)	ENSMUSG00000055980	Irs1	insulin-receptor-substrate-1		yes	Hypo
Chr7	73689809	73690886	-0.52932	0.020612	0.49273	Distal-Intergenic	NA	NA	NA			Hypo
Chr2	143567864	143569088	0.471187	0.0206736	0.49273	Intron-(uc008mqf.2/18549,-intron-5-of-11)	ENSMUSG00000027420	Bfsp1	beaded-filament-structural-protein-1,-in-lens-CP94			Hyper
Chr3	14869671	14870696	0.480553	0.0207022	0.49273	Exon-(uc008oqs.1/12350,-exon-6-of-7)	ENSMUSG00000027559	Car3	carbonic-anhydrase-3			Hyper
Chr15	66723193	66724256	-0.37105	0.0207248	0.49273	Promoter-(<=1kb)	ENSMUSG00000005124	Wisp1	WNT1-inducible-signaling-pathway-protein-1			Hypo
Chr4	107228607	107230489	0.326644	0.0207791	0.49273	Intron-(uc008tzv.1/230587,-intron-2-of-10)	ENSMUSG00000034762	Glis1	GLIS-family-zinc-finger-1			Hyper
Chr7	16686125	16687185	0.656915	0.0207868	0.49273	Promoter-(2-3kb)	ENSMUSG00000006024	Napa	N-ethylmaleimide-sensitive-fusion-protein-attachment-protein-alpha			Hyper
Chr2	74401739	74402992	0.430693	0.0208376	0.49273	Intron-(uc008kdq.2/69605,-intron-4-of-12)	ENSMUSG00000009207	Lnpk	lunapark,-ER-junction-formation-factor			Hyper
Chr16	43404106	43405663	-0.397738	0.0208429	0.49273	Intron-(uc007zga.2/56490,-intron-4-of-10)	ENSMUSG00000022708	Zbtb20	zinc-finger-and-BTB-domain-containing-20		yes	Hypo
Chr8	114470224	114471368	-0.428607	0.0208558	0.49273	Intron-(uc009nnb.1/93739,-intron-3-of-3)	ENSMUSG00000031950	Gabarapl2	gamma-aminobutyric-acid-(GABA)-A-receptor-associated-protein-like-2			Hypo
Chr12	82333609	82334664	0.599986	0.0208677	0.49273	Intron-(uc007oby.1/uc007oby.1,-intron-1-of-1)	ENSMUSG00000092673	Mir3067	microRNA-3067			Hyper
Chr12	52695983	52697355	0.433827	0.0208869	0.49273	Promoter-(1-2kb)	ENSMUSG00000020953	Coch	cochlin			Hyper
Chr14	32478715	32480035	0.352299	0.0209262	0.49273	Exon-(uc007sxy.2/26363,-exon-3-of-4)	ENSMUSG00000021900	Btd	biotinidase			Hyper
Chr16	4874804	4876311	0.333306	0.0209347	0.49273	3'-UTR	ENSMUSG00000039568	Ubald1	UBA-like-domain-containing-1			Hyper
Chr3	41386491	41387919	-0.345537	0.0209736	0.49273	Intron-(uc008pcj.2/269424,-intron-2-of-10)	ENSMUSG00000025764	Jade1	jade-family-PHD-finger-1			Hypo
Chr18	77422104	77423253	-0.450668	0.0209865	0.49273	Promoter-(1-2kb)	ENSMUSG00000025425	St8sia5	ST8-alpha-N-acetyl-neuraminide-alpha-2,8-sialyltransferase-5		yes	Hypo
Chr15	76332189	76333222	-0.441519	0.0209902	0.49273	Promoter-(<=1kb)	ENSMUSG00000022555	Dgat1	diacylglycerol-O-acyltransferase-1			Hypo
Chr19	56394764	56396786	-0.264316	0.0210626	0.49273	Exon-(uc012bnq.1/18175,-exon-27-of-28)	ENSMUSG00000025075	Habp2	hyaluronic-acid-binding-protein-2		yes	Hypo
Chr14	70539046	70540076	0.389782	0.0211355	0.49273	Exon-(uc007unf.1/219158,-exon-17-of-21)	ENSMUSG00000033712	Ccar2	cell-cycle-activator-and-apoptosis-regulator-2			Hyper
Chr17	78799628	78801173	-0.299844	0.0211401	0.49273	Exon-(uc008dov.1/225020,-exon-5-of-8)	ENSMUSG00000056121	Fez2	fasciculation-and-elongation-protein-zeta-2-(zygin-II)			Hypo
Chr4	100027607	100028633	0.413214	0.0211479	0.49273	Intron-(uc008tvd.1/26563,-intron-4-of-8)	ENSMUSG00000069733	Ube2u	ubiquitin-conjugating-enzyme-E2U-(putative)			Hyper
Chr5	150170980	150172095	-0.422917	0.021149	0.49273	Exon-(uc009apr.1/uc009apr.1,-exon-2-of-7)	ENSMUSG00000029659	Medag	mesenteric-estrogen-dependent-adipogenesis			Hypo
Chr6	146146264	146147305	0.452276	0.0212328	0.49273	Intron-(uc009erw.1/16439,-intron-45-of-56)	ENSMUSG00000030255	Sspn	sarcospan			Hyper
Chr2	4450569	4451657	-0.40385	0.0212663	0.49273	Exon-(uc008ieo.2/209630,-exon-8-of-23)	ENSMUSG00000026657	Frmd4a	FERM-domain-containing-4A		yes	Hypo
Chr19	59098322	59099399	0.549702	0.0213036	0.49273	Intron-(uc008ibc.1/71653,-intron-1-of-7)	ENSMUSG00000041362	Shtn1	shootin-1			Hyper
Chr10	118605420	118606978	-0.400983	0.0213478	0.49273	Distal-Intergenic	NA	NA	NA			Hypo
Chr18	76212967	76214078	0.399511	0.021388	0.49273	Intron-(uc008fqh.1/207259,-intron-3-of-5)	ENSMUSG00000044646	Zbtb7c	zinc-finger-and-BTB-domain-containing-7C			Hyper
Chr13	32528426	32529625	0.450845	0.0214109	0.49273	Distal-Intergenic	NA	NA	NA			Hyper
Chr8	12882424	12883500	0.459889	0.0214177	0.49273	Intron-(uc009kwk.2/17207,-intron-2-of-29)	ENSMUSG00000031442	Mcf2l	mcf.2-transforming-sequence-like			Hyper
Chr2	103447691	103449223	0.30269	0.0214321	0.49273	Intron-(uc008lix.1/99382,-intron-1-of-16)	ENSMUSG00000032724	Abtb2	ankyrin-repeat-and-BTB-(POZ)-domain-containing-2			Hyper
Chr8	48877051	48878144	-0.414723	0.0215039	0.49273	Distal-Intergenic	NA	NA	NA			Hypo
Chr15	39703439	39704598	0.408826	0.0215174	0.49273	3'-UTR	ENSMUSG00000022304	Dpys	dihydropyrimidinase			Hyper
Chr12	27473504	27474909	-0.480664	0.021518	0.49273	Distal-Intergenic	NA	NA	NA			Hypo
Chr1	9538008	9539159	0.453327	0.0215208	0.49273	Promoter-(<=1kb)	ENSMUSG00000025911	Adhfe1	alcohol-dehydrogenase,-iron-containing,-1			Hyper
Chr15	7239175	7240298	-0.4127	0.0215262	0.49273	Exon-(uc007vea.1/268780,-exon-6-of-22)	ENSMUSG00000042961	Egflam	EGF-like,-fibronectin-type-III-and-laminin-G-domains		yes	Hypo
Chr5	5276200	5277248	-0.452051	0.0215329	0.49273	Intron-(uc008wii.2/18647,-intron-2-of-14)	ENSMUSG00000028926	Cdk14	cyclin-dependent-kinase-14		yes	Hypo
Chr9	34926235	34927486	-0.399203	0.0215357	0.49273	Promoter-(1-2kb)	ENSMUSG00000070315	4930581F22Rik	RIKEN-cDNA-4930581F22-gene			Hypo
Chr12	92457337	92458908	-0.449797	0.0215731	0.492926	Intron-(uc011ypv.1/75216,-intron-5-of-12)	ENSMUSG00000061533	Cep128	centrosomal-protein-128			Hypo
Chr16	49859757	49860830	0.442535	0.0216297	0.49356	Intron-(uc007zkg.1/16423,-intron-1-of-9)	ENSMUSG00000055447	Cd47	CD47-antigen-(Rh-related-antigen,-integrin-associated-signal-transducer)		yes	Hyper
Chr15	12150554	12151747	-0.36738	0.0217516	0.493976	Intron-(uc007vhl.1/268783,-intron-1-of-15)	ENSMUSG00000039458	Mtmr12	myotubularin-related-protein-12	yes	yes	Hypo
Chr14	76758962	76760296	-0.374318	0.0217571	0.493976	Distal-Intergenic	NA	NA	NA			Hypo
Chr11	106754261	106755303	0.481134	0.0217782	0.493976	Intron-(uc007lzx.2/66313,-intron-1-of-18)	ENSMUSG00000018363	Smurf2	SMAD-specific-E3-ubiquitin-protein-ligase-2			Hyper
Chr12	72518838	72519928	-0.420028	0.0217918	0.493976	Intron-(uc007nus.1/uc007nus.1,-intron-2-of-5)	ENSMUSG00000044548	Dact1	dishevelled-binding-antagonist-of-beta-catenin-1			Hypo
Chr8	90038260	90039915	-0.347299	0.0217922	0.493976	Intron-(uc009mqs.1/100040294,-intron-1-of-3)	ENSMUSG00000097248	Gm2694	predicted-gene-2694			Hypo
Chr10	26598262	26599402	-0.38476	0.0218507	0.494646	Exon-(uc007ese.1/73910,-exon-9-of-15)	ENSMUSG00000039031	Arhgap18	Rho-GTPase-activating-protein-18		yes	Hypo
Chr9	115849764	115851019	-0.387174	0.0219261	0.495273	Exon-(uc009ryr.2/73748,-exon-3-of-15)	ENSMUSG00000056880	Gadl1	glutamate-decarboxylase-like-1		yes	Hypo
Chr1	88955592	88956722	-0.509557	0.0219821	0.495273	Distal-Intergenic	NA	NA	NA			Hypo
Chr1	155855371	155856408	0.481894	0.0220533	0.495273	Distal-Intergenic	NA	NA	NA			Hyper
Chr13	53072267	53073489	0.371583	0.0220694	0.495273	Promoter-(2-3kb)	ENSMUSG00000056749	Nfil3	nuclear-factor,-interleukin-3,-regulated		yes	Hyper
Chr1	50998952	50999978	-0.42674	0.0220721	0.495273	Intron-(uc007axi.1/56363,-intron-8-of-9)	ENSMUSG00000026109	Tmeff2	transmembrane-protein-with-EGF-like-and-two-follistatin-like-domains-2		yes	Hypo
Chr17	87264858	87265942	-0.576168	0.0220722	0.495273	Distal-Intergenic	NA	NA	NA			Hypo
Chr9	75232392	75233543	0.460085	0.0221653	0.495273	Downstream-(1-2kb)	ENSMUSG00000042688	Mapk6	mitogen-activated-protein-kinase-6			Hyper
Chr13	111496325	111497651	-0.37434	0.0221698	0.495273	Distal-Intergenic	NA	NA	NA			Hypo
Chr2	155844464	155845566	0.404165	0.0221905	0.495273	3'-UTR	ENSMUSG00000005881	Ergic3	ERGIC-and-golgi-3			Hyper
Chr8	71681006	71682152	-0.389994	0.0221929	0.495273	Distal-Intergenic	NA	NA	NA			Hypo
Chr16	38784201	38785589	0.396616	0.0221967	0.495273	Exon-(uc007zfm.2/22268,-exon-4-of-8)	ENSMUSG00000049436	Upk1b	uroplakin-1B			Hyper
Chr5	122831509	122832627	0.408768	0.0222382	0.495333	3'-UTR	ENSMUSG00000029464	Gpn3	GPN-loop-GTPase-3			Hyper
Chr12	31984111	31985504	-0.343153	0.0222573	0.495333	Exon-(uc007nhd.1/16777,-exon-15-of-33)	ENSMUSG00000002900	Lamb1	laminin-B1		yes	Hypo
Chr3	109586113	109587496	-0.473736	0.0223128	0.495491	Intron-(uc008rai.2/80883,-intron-5-of-5)	ENSMUSG00000033721	Vav3	vav-3-oncogene		yes	Hypo
Chr9	45946405	45948839	-0.307202	0.0223223	0.495491	Intron-(uc009pgz.2/70661,-intron-3-of-24)	ENSMUSG00000034135	Sik3	SIK-family-kinase-3			Hypo
Chr14	57238299	57239377	-0.592477	0.0225156	0.497943	Exon-(uc007ucd.2/328417,-exon-22-of-35)	ENSMUSG00000054509	Parp4	poly-(ADP-ribose)-polymerase-family,-member-4			Hypo
Chr16	7224002	7225065	0.494207	0.0225164	0.497943	Exon-(uc007ycb.2/268859,-exon-5-of-16)	ENSMUSG00000008658	Rbfox1	RNA-binding-protein,-fox-1-homolog-(C.-elegans)-1	yes	yes	Hyper
Chr12	86637267	86639087	0.401976	0.0225292	0.497943	3'-UTR	ENSMUSG00000045064	Zc2hc1c	zinc-finger,-C2HC-type-containing-1C			Hyper
Chr2	178030023	178031053	0.629595	0.0225491	0.497943	Intron-(uc008ohj.2/74189,-intron-7-of-12)	ENSMUSG00000060445	Sycp2	synaptonemal-complex-protein-2			Hyper
Chr9	62056389	62057600	0.409392	0.0227352	0.501406	Distal-Intergenic	NA	NA	NA			Hyper
Chr6	97229717	97231262	-0.327691	0.0228114	0.501787	Distal-Intergenic	NA	NA	NA			Hypo
Chr4	11283812	11285129	0.410941	0.0228126	0.501787	3'-UTR	ENSMUSG00000040728	Esrp1	epithelial-splicing-regulatory-protein-1			Hyper
Chr15	66782831	66784463	-0.393512	0.0228405	0.501787	Intron-(uc007wax.1/17988,-intron-3-of-15)	ENSMUSG00000005125	Ndrg1	N-myc-downstream-regulated-gene-1		yes	Hypo
Chr17	84044159	84045365	0.428139	0.0228923	0.501815	Distal-Intergenic	NA	NA	NA			Hyper
Chr8	119451510	119452967	0.371865	0.0229004	0.501815	Exon-(uc009noo.1/72155,-exon-4-of-12)	ENSMUSG00000031756	Cenpn	centromere-protein-N		yes	Hyper
Chr8	23564217	23565314	0.411319	0.0229465	0.502182	Distal-Intergenic	NA	NA	NA			Hyper
Chr17	32627292	32628380	-0.524685	0.0230321	0.50283	Exon-(uc008bxe.1/320997,-exon-12-of-14)	ENSMUSG00000091586	Cyp4f17	cytochrome-P450,-family-4,-subfamily-f,-polypeptide-17			Hypo
Chr8	108485122	108486191	0.329765	0.0230412	0.50283	Intron-(uc009ner.1/20498,-intron-1-of-23)	ENSMUSG00000017765	Slc12a4	solute-carrier-family-12,-member-4			Hyper
Chr2	45319545	45320911	-0.411344	0.0230759	0.50283	Distal-Intergenic	NA	NA	NA			Hypo
Chr1	133907305	133908385	0.405686	0.0231021	0.50283	Intron-(uc007cob.1/13714,-intron-1-of-5)	ENSMUSG00000026436	Elk4	ELK4,-member-of-ETS-oncogene-family		yes	Hyper
Chr3	89182984	89184425	-0.337164	0.0231346	0.50283	3'-UTR	ENSMUSG00000028042	Zbtb7b	zinc-finger-and-BTB-domain-containing-7B			Hypo
Chr18	16836400	16837695	0.384036	0.0231681	0.50283	Intron-(uc008edx.2/12558,-intron-2-of-15)	ENSMUSG00000024304	Cdh2	cadherin-2		yes	Hyper
Chr2	102497109	102498120	0.456715	0.0231818	0.50283	Promoter-(<=1kb)	ENSMUSG00000005089	Slc1a2	solute-carrier-family-1-(glial-high-affinity-glutamate-transporter),-member-2		yes	Hyper
Chr3	119450362	119451373	0.443549	0.0232863	0.504458	3'-UTR	ENSMUSG00000028134	Ptbp2	polypyrimidine-tract-binding-protein-2		yes	Hyper
Chr18	36259517	36260646	0.403045	0.0233446	0.505081	Intron-(uc012bbl.1/100042150,-intron-1-of-9)	NA	4930471G03Rik	RIKEN-cDNA-4930471G03-gene			Hyper
Chr11	35621531	35622664	-0.496958	0.0234361	0.50612	3'-UTR	ENSMUSG00000051062	Fbll1	fibrillarin-like-1			Hypo
Chr2	171158291	171159444	-0.395551	0.0234665	0.50612	Distal-Intergenic	NA	NA	NA			Hypo
Chr5	71450585	71451596	-0.40357	0.0234813	0.50612	Intron-(uc008xqw.1/14395,-intron-3-of-9)	ENSMUSG00000000560	Gabra2	gamma-aminobutyric-acid-(GABA)-A-receptor,-subunit-alpha-2			Hypo
Chr9	120459211	120460787	0.375353	0.0235993	0.508023	Intron-(uc009scq.2/215446,-intron-3-of-10)	ENSMUSG00000041608	Entpd3	ectonucleoside-triphosphate-diphosphohydrolase-3			Hyper
Chr19	25374589	25375613	0.417379	0.0236341	0.508132	Intron-(uc008hbf.1/107351,-intron-2-of-13)	ENSMUSG00000032702	Kank1	KN-motif-and-ankyrin-repeat-domains-1	yes	yes	Hyper
Chr3	37861126	37862584	-0.385956	0.0238092	0.509472	Distal-Intergenic	NA	NA	NA			Hypo
Chr5	135366828	135367850	0.427223	0.0238341	0.509472	Distal-Intergenic	NA	NA	NA			Hyper
Chr11	102676719	102678128	-0.406426	0.0238874	0.509472	Promoter-(2-3kb)	ENSMUSG00000034520	Gjc1	gap-junction-protein,-gamma-1		yes	Hypo
Chr15	98869837	98871165	-0.375669	0.0239392	0.509472	Distal-Intergenic	NA	NA	NA			Hypo
Chr7	52777648	52779105	-0.350553	0.0239401	0.509472	Promoter-(2-3kb)	ENSMUSG00000040435	Ppp1r15a	protein-phosphatase-1,-regulatory-(inhibitor)-subunit-15A		yes	Hypo
Chr1	189669876	189671319	-0.419165	0.0239662	0.509472	Intron-(uc007eaa.1/26381,-intron-2-of-7)	ENSMUSG00000026610	Esrrg	estrogen-related-receptor-gamma		yes	Hypo
Chr3	115729826	115731026	-0.36898	0.0239693	0.509472	3'-UTR	ENSMUSG00000027963	Extl2	exostoses-(multiple)-like-2			Hypo
Chr6	71083246	71084658	-0.399598	0.0240037	0.509472	Exon-(uc009cgf.1/232078,-exon-6-of-10)	ENSMUSG00000054474	Thnsl2	threonine-synthase-like-2-(bacterial)			Hypo
Chr3	107203737	107204805	-0.485271	0.0240151	0.509472	Distal-Intergenic	NA	NA	NA			Hypo
Chr4	129278900	129280226	0.434997	0.0240462	0.509472	Promoter-(<=1kb)	ENSMUSG00000028797	Tmem234	transmembrane-protein-234			Hyper
Chr14	29488886	29490262	-0.399698	0.0241242	0.509472	Distal-Intergenic	NA	NA	NA			Hypo
Chr5	110926684	110927788	-0.354848	0.0241628	0.509472	Distal-Intergenic	NA	NA	NA			Hypo
Chr2	105645745	105647245	-0.429851	0.0241646	0.509472	Intron-(uc008lld.1/77766,-intron-7-of-9)	ENSMUSG00000027167	Elp4	elongator-acetyltransferase-complex-subunit-4			Hypo
Chr1	173168388	173169768	-0.35206	0.0241773	0.509472	Exon-(uc007dnm.1/226646,-exon-4-of-13)	ENSMUSG00000058715	Fcer1g	Fc-receptor,-IgE,-high-affinity-I,-gamma-polypeptide			Hypo
Chr9	62014491	62015554	-0.431549	0.0242105	0.509472	Distal-Intergenic	NA	NA	NA			Hypo
Chr15	86064804	86066827	0.330693	0.024244	0.509472	Exon-(uc007xea.1/223754,-exon-2-of-13)	ENSMUSG00000051864	Tbc1d22a	TBC1-domain-family,-member-22a			Hyper
Chr10	61545246	61546610	0.441142	0.0242584	0.509472	Distal-Intergenic	NA	NA	NA			Hyper
Chr11	104405968	104407137	0.393265	0.0242688	0.509472	Intron-(uc007lwq.1/217232,-intron-1-of-18)	ENSMUSG00000020687	Cdc27	cell-division-cycle-27		yes	Hyper
Chr5	24263030	24264376	-0.404906	0.0242803	0.509472	Promoter-(<=1kb)	ENSMUSG00000038135	Crygn	crystallin,-gamma-N			Hypo
Chr18	57380403	57381700	-0.372177	0.0242917	0.509472	Intron-(uc008eyz.2/70417,-intron-5-of-24)	ENSMUSG00000024593	Megf10	multiple-EGF-like-domains-10		yes	Hypo
Chr6	145706629	145707869	0.29846	0.0244339	0.511102	Distal-Intergenic	NA	NA	NA			Hyper
Chr4	130483025	130484245	-0.360138	0.0244578	0.511102	Intron-(uc012dlx.1/16792,-intron-3-of-8)	ENSMUSG00000028581	Laptm5	lysosomal-associated-protein-transmembrane-5			Hypo
Chr15	57551668	57553021	0.381855	0.024502	0.511102	Intron-(uc007vsp.1/387609,-intron-1-of-3)	ENSMUSG00000071757	Zhx2	zinc-fingers-and-homeoboxes-2			Hyper
Chr17	25608548	25609708	-0.37653	0.0245193	0.511102	Promoter-(<=1kb)	ENSMUSG00000024175	Tekt4	tektin-4			Hypo
Chr8	49578617	49579628	-0.416131	0.0246156	0.511102	Intron-(uc009lrr.2/23965,-intron-2-of-26)	ENSMUSG00000031561	Tenm3	teneurin-transmembrane-protein-3			Hypo
Chr13	52234808	52236100	-0.393915	0.0246245	0.511102	Distal-Intergenic	NA	NA	NA			Hypo
Chr4	115491221	115492333	0.457915	0.0246363	0.511102	Distal-Intergenic	NA	NA	NA			Hyper
Chr18	10156594	10158207	0.369348	0.0248317	0.511102	Intron-(uc008eaq.1/19877,-intron-1-of-32)	ENSMUSG00000024290	Rock1	Rho-associated-coiled-coil-containing-protein-kinase-1		yes	Hyper
Chr10	124701789	124703063	0.336633	0.0248593	0.511102	Intron-(uc007hgx.1/20503,-intron-3-of-5)	ENSMUSG00000020102	Slc16a7	solute-carrier-family-16-(monocarboxylic-acid-transporters),-member-7			Hyper
Chr19	5497152	5498224	-0.385167	0.0248725	0.511102	Exon-(uc008gdr.1/225861,-exon-4-of-12)	ENSMUSG00000100937	1700020D05Rik	RIKEN-cDNA-1700020D05-gene			Hypo
Chr7	106248432	106249619	0.34541	0.0248883	0.511102	Intron-(uc009ikz.2/78610,-intron-3-of-14)	ENSMUSG00000035354	Uvrag	UV-radiation-resistance-associated-gene			Hyper
Chr6	144247046	144248146	-0.368164	0.0248989	0.511102	Intron-(uc009eqn.1/20678,-intron-4-of-13)	ENSMUSG00000041540	Sox5	SRY-(sex-determining-region-Y)-box-5			Hypo
Chr19	32440650	32441775	0.403255	0.0249106	0.511102	Intron-(uc008hfg.2/208449,-intron-1-of-9)	ENSMUSG00000040451	Sgms1	sphingomyelin-synthase-1		yes	Hyper
Chr4	119939271	119940932	-0.363739	0.0249586	0.511102	3'-UTR	ENSMUSG00000052135	Foxo6	forkhead-box-O6		yes	Hypo
Chr8	87124098	87125989	-0.286729	0.0249661	0.511102	Promoter-(<=1kb)	ENSMUSG00000034656	Cacna1a	calcium-channel,-voltage-dependent,-P/Q-type,-alpha-1A-subunit		yes	Hypo
Chr1	163110417	163111572	-0.462979	0.0249664	0.511102	Distal-Intergenic	NA	NA	NA			Hypo
Chr19	7263392	7264703	-0.340881	0.0249702	0.511102	Intron-(uc008gkg.2/107227,-intron-4-of-10)	ENSMUSG00000024767	Otub1	OTU-domain,-ubiquitin-aldehyde-binding-1			Hypo
Chr19	53997443	53999198	-0.292032	0.0249821	0.511102	Intron-(uc008hxb.2/18569,-intron-8-of-11)	ENSMUSG00000024976	Shoc2	soc-2-(suppressor-of-clear)-homolog-(C.-elegans)			Hypo
Chr16	98056796	98057851	-0.524139	0.0250276	0.511102	5'-UTR	ENSMUSG00000014039	Prdm15	PR-domain-containing-15			Hypo
Chr1	156981417	156982714	0.421357	0.0250543	0.511102	Intron-(uc007day.1/15064,-intron-3-of-5)	ENSMUSG00000026471	Mr1	major-histocompatibility-complex,-class-I-related		yes	Hyper
Chr2	167894038	167895191	-0.399946	0.025059	0.511102	Distal-Intergenic	NA	NA	NA			Hypo
Chr13	54084526	54085695	0.434045	0.0250603	0.511102	Distal-Intergenic	NA	NA	NA			Hyper
Chr14	64372740	64374017	0.45166	0.0250982	0.511102	Intron-(uc007uhu.2/219149,-intron-1-of-2)	ENSMUSG00000076049	Mir598	microRNA-598			Hyper
Chr15	34180085	34181633	0.380101	0.0251137	0.511102	Intron-(uc007vlj.1/114128,-intron-1-of-6)	ENSMUSG00000022257	Laptm4b	lysosomal-associated-protein-transmembrane-4B		yes	Hyper
Chr7	72807856	72809144	0.475994	0.0251165	0.511102	Exon-(uc009hgr.2/272396,-exon-9-of-13)	ENSMUSG00000030515	Tarsl2	threonyl-tRNA-synthetase-like-2			Hyper
Chr8	88951195	88952239	0.518927	0.0251754	0.511102	Distal-Intergenic	NA	NA	NA			Hyper
Chr3	101487696	101488745	0.431131	0.0251876	0.511102	Distal-Intergenic	NA	NA	NA			Hyper
Chr10	120786139	120787219	0.414623	0.0252057	0.511102	Distal-Intergenic	NA	NA	NA			Hyper
Chr19	26930583	26931860	-0.539916	0.0252674	0.511282	Distal-Intergenic	NA	NA	NA			Hypo
Chr7	132648573	132649855	-0.446665	0.0253525	0.511282	Distal-Intergenic	NA	NA	NA			Hypo
Chr11	100273500	100275070	0.283369	0.0253731	0.511282	Promoter-(1-2kb)	ENSMUSG00000006931	P3h4	prolyl-3-hydroxylase-family-member-4-(non-enzymatic)			Hyper
Chr14	102973772	102974837	-0.407305	0.0253976	0.511282	Distal-Intergenic	NA	NA	NA			Hypo
Chr16	30067714	30069127	-0.426568	0.0254059	0.511282	Promoter-(2-3kb)	ENSMUSG00000022528	Hes1	hes-family-bHLH-transcription-factor-1		yes	Hypo
Chr3	107403051	107404066	0.488953	0.0254228	0.511282	Exon-(uc008qxf.1/11694,-exon-2-of-4)	ENSMUSG00000014603	Alx3	aristaless-like-homeobox-3			Hyper
Chr11	68218953	68220227	-0.379856	0.0254453	0.511282	Distal-Intergenic	NA	NA	NA			Hypo
Chr7	108494061	108495170	0.340037	0.0254536	0.511282	Promoter-(1-2kb)	ENSMUSG00000032812	Arap1	ArfGAP-with-RhoGAP-domain,-ankyrin-repeat-and-PH-domain-1		yes	Hyper
Chr11	60845780	60846893	0.447987	0.0255666	0.512951	Intron-(uc007jgy.2/16515,-intron-1-of-1)	ENSMUSG00000042529	Kcnj12	potassium-inwardly-rectifying-channel,-subfamily-J,-member-12			Hyper
Chr14	79887916	79889269	0.37778	0.0255988	0.512995	Intron-(uc007utb.1/13709,-intron-1-of-8)	ENSMUSG00000022023	Wbp4	WW-domain-binding-protein-4			Hyper
Chr14	121919012	121920115	-0.438448	0.0256842	0.513126	Distal-Intergenic	NA	NA	NA			Hypo
Chr5	115420219	115421431	-0.448625	0.0257233	0.513126	Promoter-(<=1kb)	ENSMUSG00000029556	Hnf1a	HNF1-homeobox-A		yes	Hypo
Chr10	95825652	95826747	-0.464355	0.0257321	0.513126	Distal-Intergenic	NA	NA	NA			Hypo
Chr14	79990476	79991622	-0.409882	0.0257365	0.513126	Promoter-(2-3kb)	ENSMUSG00000022024	Sugt1	SGT1,-suppressor-of-G2-allele-of-SKP1-(S.-cerevisiae)			Hypo
Chr1	42472506	42473552	-0.524018	0.0257729	0.513126	Distal-Intergenic	NA	NA	NA			Hypo
Chr10	79137825	79139002	-0.329231	0.0257852	0.513126	3'-UTR	ENSMUSG00000020308	Tpgs1	tubulin-polyglutamylase-complex-subunit-1			Hypo
Chr15	8372785	8373804	0.44115	0.0258833	0.513717	Intron-(uc007veq.1/71175,-intron-1-of-46)	ENSMUSG00000022141	Nipbl	NIPBL-cohesin-loading-factor			Hyper
Chr11	85998371	85999796	-0.472601	0.0259287	0.513717	Intron-(uc007ksf.2/237911,-intron-6-of-19)	ENSMUSG00000034329	Brip1	BRCA1-interacting-protein-C-terminal-helicase-1		yes	Hypo
Chr4	138594515	138595945	-0.330174	0.0259701	0.513717	Intron-(uc008vlp.2/77056,-intron-14-of-16)	ENSMUSG00000041143	Tmco4	transmembrane-and-coiled-coil-domains-4			Hypo
Chr14	68449139	68450505	0.359946	0.025978	0.513717	Exon-(uc007ull.1/68813,-exon-11-of-52)	ENSMUSG00000044447	Dock5	dedicator-of-cytokinesis-5			Hyper
Chr9	44160480	44161574	-0.409239	0.025979	0.513717	3'-UTR	ENSMUSG00000032127	Vps11	VPS11,-CORVET/HOPS-core-subunit			Hypo
Chr1	82644435	82645578	-0.496825	0.025995	0.513717	Exon-(uc007brv.1/12828,-exon-4-of-52)	ENSMUSG00000079465	Col4a3	collagen,-type-IV,-alpha-3			Hypo
Chr9	121278531	121279765	0.347812	0.0260693	0.514559	Promoter-(2-3kb)	ENSMUSG00000032536	Trak1	trafficking-protein,-kinesin-binding-1		yes	Hyper
Chr10	13625097	13626114	-0.445747	0.0260978	0.514559	Distal-Intergenic	NA	NA	NA			Hypo
Chr11	108041116	108042873	0.308503	0.02613	0.514601	Intron-(uc011ygr.1/18750,-intron-3-of-16)	ENSMUSG00000050965	Prkca	protein-kinase-C,-alpha		yes	Hyper
Chr1	137610331	137611539	-0.520364	0.0261693	0.514783	Distal-Intergenic	NA	NA	NA			Hypo
Chr12	86164014	86165506	-0.390645	0.0262076	0.514944	Intron-(uc011ypd.1/16997,-intron-8-of-34)	ENSMUSG00000002020	Ltbp2	latent-transforming-growth-factor-beta-binding-protein-2		yes	Hypo
Chr3	146569065	146570188	0.410616	0.0262699	0.515577	Intron-(uc008rrw.2/70892,-intron-7-of-14)	ENSMUSG00000036745	Ttll7	tubulin-tyrosine-ligase-like-family,-member-7			Hyper
Chr17	56919549	56920730	0.420654	0.0263113	0.515799	Exon-(uc008ddf.2/19725,-exon-13-of-17)	NA	NA	NA			Hyper
Chr11	101946000	101947075	-0.411843	0.0263983	0.516026	Promoter-(2-3kb)	ENSMUSG00000017314	Mpp2	membrane-protein,-palmitoylated-2-(MAGUK-p55-subfamily-member-2)		yes	Hypo
Chr6	112227249	112228405	-0.53972	0.0264833	0.516026	Intron-(uc009ddv.2/30937,-intron-1-of-5)	ENSMUSG00000057604	Lmcd1	LIM-and-cysteine-rich-domains-1			Hypo
Chr9	65064540	65066377	0.297126	0.026535	0.516026	Promoter-(1-2kb)	ENSMUSG00000032392	Parp16	poly-(ADP-ribose)-polymerase-family,-member-16			Hyper
Chr7	108076892	108079892	-0.219495	0.0265433	0.516026	Promoter-(<=1kb)	ENSMUSG00000032875	Arhgef17	Rho-guanine-nucleotide-exchange-factor-(GEF)-17			Hypo
Chr15	9042846	9044300	0.327011	0.0265629	0.516026	3'-UTR	ENSMUSG00000054115	Skp2	S-phase-kinase-associated-protein-2-(p45)		yes	Hyper
Chr11	81215345	81216364	-0.445078	0.0265703	0.516026	Intron-(uc007kmm.1/11418,-intron-1-of-9)	ENSMUSG00000038845	1700071K01Rik	RIKEN-cDNA-1700071K01-gene			Hypo
Chr8	129105104	129106189	0.414619	0.0265707	0.516026	Distal-Intergenic	NA	NA	NA			Hyper
Chr10	79615892	79617266	-0.336481	0.0266248	0.516026	Exon-(uc007gca.1/59090,-exon-5-of-9)	ENSMUSG00000035621	Midn	midnolin			Hypo
Chr10	18316780	18318059	0.437434	0.0266323	0.516026	Exon-(uc007emn.1/215821,-exon-30-of-34)	ENSMUSG00000019853	Hebp2	heme-binding-protein-2		yes	Hyper
Chr6	54311533	54312547	-0.434835	0.0266544	0.516026	Intron-(uc012eme.1/100042056,-intron-3-of-13)	ENSMUSG00000045725	Prr15	proline-rich-15			Hypo
Chr2	115575897	115577213	-0.458274	0.0266546	0.516026	Intron-(uc008lqr.2/399568,-intron-10-of-10)	ENSMUSG00000088606	Mir1951	microRNA-1951			Hypo
Chr19	5954852	5956751	0.326223	0.0268585	0.518365	3'-UTR	ENSMUSG00000024833	Pola2	polymerase-(DNA-directed),-alpha-2			Hyper
Chr2	180237009	180238096	0.420697	0.0268971	0.518365	Promoter-(2-3kb)	ENSMUSG00000027568	Ntsr1	neurotensin-receptor-1		yes	Hyper
Chr4	134757379	134758439	-0.405788	0.0269187	0.518365	Distal-Intergenic	NA	NA	NA			Hypo
Chr6	127402630	127403668	0.554463	0.0269445	0.518365	Promoter-(<=1kb)	ENSMUSG00000037997	Parp11	poly-(ADP-ribose)-polymerase-family,-member-11			Hyper
Chr18	68064412	68065748	-0.434384	0.0269512	0.518365	Distal-Intergenic	NA	NA	NA			Hypo
Chr3	85868387	85869629	0.405731	0.0269572	0.518365	Intron-(uc008pqy.1/uc008pqy.1,-intron-2-of-3)	ENSMUSG00000028082	Sh3d19	SH3-domain-protein-D19			Hyper
Chr1	75591605	75592825	0.403642	0.0271055	0.519391	Distal-Intergenic	NA	NA	NA			Hyper
Chr12	25665458	25666461	0.370239	0.027155	0.519391	Intron-(uc007nez.1/77480,-intron-1-of-7)	ENSMUSG00000036333	Kidins220	kinase-D-interacting-substrate-220		yes	Hyper
Chr17	81950011	81951796	-0.323716	0.0271582	0.519391	Intron-(uc008drr.2/20541,-intron-2-of-8)	ENSMUSG00000054640	Slc8a1	solute-carrier-family-8-(sodium/calcium-exchanger),-member-1		yes	Hypo
Chr10	89061996	89063001	-0.502945	0.0272257	0.519391	Promoter-(<=1kb)	ENSMUSG00000019935	Slc17a8	solute-carrier-family-17-(sodium-dependent-inorganic-phosphate-cotransporter),-member-8			Hypo
Chr18	24175392	24176921	-0.331579	0.0272661	0.519391	Promoter-(1-2kb)	ENSMUSG00000051469	Zfp24	zinc-finger-protein-24			Hypo
Chr2	180703347	180705034	0.351939	0.0272752	0.519391	Promoter-(1-2kb)	ENSMUSG00000027575	Arfgap1	ADP-ribosylation-factor-GTPase-activating-protein-1			Hyper
Chr5	150937710	150938859	0.312871	0.0273043	0.519391	Intron-(uc009ats.1/320365,-intron-1-of-6)	ENSMUSG00000056602	Fry	FRY-microtubule-binding-protein		yes	Hyper
Chr13	43013507	43014837	0.359784	0.0273059	0.519391	Intron-(uc007qfm.1/218194,-intron-3-of-3)	ENSMUSG00000054728	Phactr1	phosphatase-and-actin-regulator-1		yes	Hyper
Chr8	123354315	123355368	0.44403	0.0273772	0.519391	Distal-Intergenic	NA	NA	NA			Hyper
Chr10	27934508	27935744	0.450368	0.0274023	0.519391	Intron-(uc007esj.1/19272,-intron-2-of-2)	ENSMUSG00000019889	Ptprk	protein-tyrosine-phosphatase,-receptor-type,-K			Hyper
Chr8	48565598	48567204	-0.317205	0.0274125	0.519391	Distal-Intergenic	NA	NA	NA			Hypo
Chr10	79777599	79778990	-0.244226	0.0274133	0.519391	3'-UTR	ENSMUSG00000020133	2310011J03Rik	RIKEN-cDNA-2310011J03-gene			Hypo
Chr3	132645654	132647179	-0.349795	0.0274152	0.519391	3'-UTR	ENSMUSG00000040998	Npnt	nephronectin			Hypo
Chr11	116367087	116368625	0.389604	0.0274579	0.519391	Distal-Intergenic	NA	NA	NA			Hyper
Chr12	4638375	4640334	0.360996	0.0275162	0.519391	Promoter-(1-2kb)	ENSMUSG00000020640	Itsn2	intersectin-2		yes	Hyper
Chr12	100863978	100865176	0.324393	0.0275503	0.519391	Exon-(uc007osa.1/uc007osa.1,-exon-2-of-2)	ENSMUSG00000033713	Foxn3	forkhead-box-N3		yes	Hyper
Chr4	141104357	141105369	0.366763	0.02759	0.519391	Promoter-(2-3kb)	NA	B330016D10Rik	RIKEN-cDNA-B330016D10-gene			Hyper
Chr11	81786594	81787922	-0.442919	0.0276365	0.519391	Distal-Intergenic	NA	NA	NA			Hypo
Chr10	80862460	80863640	-0.312355	0.0276446	0.519391	3'-UTR	ENSMUSG00000078439	Smim24	small-integral-membrane-protein-24			Hypo
Chr10	80390233	80391395	-0.406148	0.0276463	0.519391	Promoter-(1-2kb)	ENSMUSG00000015312	Gadd45b	growth-arrest-and-DNA-damage-inducible-45-beta		yes	Hypo
Chr5	140934599	140935603	-0.545464	0.0276671	0.519391	Distal-Intergenic	NA	NA	NA			Hypo
Chr17	35576504	35577554	-0.415636	0.0276782	0.519391	Promoter-(<=1kb)	ENSMUSG00000060550	H2-Q7	histocompatibility-2,-Q-region-locus-7			Hypo
Chr4	102737834	102739463	-0.374149	0.0277587	0.520331	Exon-(uc012dhp.1/242584,-exon-2-of-8)	ENSMUSG00000035126	Wdr78	WD-repeat-domain-78			Hypo
Chr11	68129147	68130200	0.381905	0.027795	0.520442	Intron-(uc007jnm.1/18208,-intron-2-of-6)	ENSMUSG00000020902	Ntn1	netrin-1			Hyper
Chr11	61849960	61851178	-0.369402	0.0278448	0.520804	Intron-(uc007jil.1/uc007jil.1,-intron-2-of-2)	ENSMUSG00000042331	Specc1	sperm-antigen-with-calponin-homology-and-coiled-coil-domains-1			Hypo
Chr5	123508325	123509419	0.452145	0.0278936	0.520894	Distal-Intergenic	NA	NA	NA			Hyper
Chr9	74832972	74834048	0.371134	0.0279384	0.520894	Intron-(uc009qrj.2/235493,-intron-2-of-12)	ENSMUSG00000034858	Fam214a	family-with-sequence-similarity-214,-member-A			Hyper
Chr18	68308437	68309495	-0.352949	0.0279479	0.520894	Intron-(uc008fng.1/52662,-intron-3-of-5)	ENSMUSG00000024544	Ldlrad4	low-density-lipoprotein-receptor-class-A-domain-containing-4			Hypo
Chr17	32378681	32379815	-0.489122	0.0279714	0.520894	Intron-(uc008bwa.2/57261,-intron-2-of-19)	ENSMUSG00000024002	Brd4	bromodomain-containing-4			Hypo
Chr13	55074975	55076334	0.341918	0.0281468	0.521715	Intron-(uc007qpp.1/107448,-intron-1-of-15)	ENSMUSG00000025876	Unc5a	unc-5-netrin-receptor-A			Hyper
Chr3	87424937	87426217	0.335638	0.0281642	0.521715	Promoter-(2-3kb)	ENSMUSG00000041977	Arhgef11	Rho-guanine-nucleotide-exchange-factor-(GEF)-11			Hyper
Chr4	99770088	99771187	0.450845	0.02819	0.521715	Promoter-(1-2kb)	ENSMUSG00000035305	Ror1	receptor-tyrosine-kinase-like-orphan-receptor-1		yes	Hyper
Chr1	54671106	54672144	0.566069	0.028216	0.521715	Distal-Intergenic	NA	NA	NA			Hyper
Chr11	43187975	43189054	0.428484	0.0282451	0.521715	Promoter-(<=1kb)	ENSMUSG00000065601	Mir146	microRNA-146			Hyper
Chr3	107670275	107672038	0.304506	0.0282458	0.521715	Distal-Intergenic	NA	NA	NA			Hyper
Chr17	33796164	33797313	-0.450373	0.0282694	0.521715	Exon-(uc008bze.2/76936,-exon-10-of-16)	ENSMUSG00000032739	Pram1	PML-RAR-alpha-regulated-adaptor-molecule-1			Hypo
Chr1	182170448	182171558	-0.468294	0.028278	0.521715	Exon-(uc007dwb.2/19165,-exon-2-of-10)	ENSMUSG00000010609	Psen2	presenilin-2		yes	Hypo
Chr2	85069727	85070837	-0.44696	0.0282974	0.521715	Distal-Intergenic	NA	NA	NA			Hypo
Chr14	67752851	67754359	-0.380734	0.0283697	0.521715	Distal-Intergenic	NA	NA	NA			Hypo
Chr14	37907267	37909035	-0.358554	0.0284471	0.521715	Promoter-(2-3kb)	ENSMUSG00000021803	Cdhr1	cadherin-related-family-member-1			Hypo
Chr9	103860470	103861632	0.446752	0.0284831	0.521715	Intron-(uc009rha.1/uc009rha.1,-intron-2-of-4)	ENSMUSG00000032558	Nphp3	nephronophthisis-3-(adolescent)			Hyper
Chr8	36463993	36465038	-0.447678	0.0285085	0.521715	Distal-Intergenic	NA	NA	NA			Hypo
Chr1	71945392	71946453	0.339287	0.0285523	0.521715	Distal-Intergenic	NA	NA	NA			Hyper
Chr7	141513787	141514883	0.414667	0.0285619	0.521715	Intron-(uc012fvh.1/71007,-intron-3-of-8)	ENSMUSG00000030994	D7Ertd443e	DNA-segment,-Chr-7,-ERATO-Doi-443,-expressed			Hyper
Chr12	72627316	72628399	-0.360722	0.0285663	0.521715	Distal-Intergenic	NA	NA	NA			Hypo
Chr19	27490752	27491967	-0.375323	0.0285778	0.521715	Exon-(uc008hby.1/52874,-exon-11-of-18)	ENSMUSG00000041360	Pum3	pumilio-RNA-binding-family-member-3			Hypo
Chr6	91490539	91491542	-0.490167	0.028587	0.521715	Distal-Intergenic	NA	NA	NA			Hypo
Chr7	122372516	122373521	0.423763	0.0286137	0.521715	Distal-Intergenic	NA	NA	NA			Hyper
Chr5	38867945	38869756	-0.318712	0.0286251	0.521715	Promoter-(1-2kb)	ENSMUSG00000005107	Slc2a9	solute-carrier-family-2-(facilitated-glucose-transporter),-member-9			Hypo
Chr3	68805124	68807073	0.362689	0.0288372	0.524856	Promoter-(1-2kb)	ENSMUSG00000027778	Ift80	intraflagellar-transport-80			Hyper
Chr18	24442737	24444050	0.409574	0.0288588	0.524856	3'-UTR	ENSMUSG00000000420	Galnt1	polypeptide-N-acetylgalactosaminyltransferase-1			Hyper
Chr19	45251580	45252640	0.519263	0.028931	0.525611	Distal-Intergenic	NA	NA	NA			Hyper
Chr2	142658414	142659663	0.405304	0.0290778	0.52686	Intron-(uc008mpz.1/16558,-intron-12-of-25)	ENSMUSG00000038844	Kif16b	kinesin-family-member-16B		yes	Hyper
Chr7	151806633	151808083	-0.347017	0.0290825	0.52686	Exon-(uc009kqm.1/101772,-exon-13-of-25)	ENSMUSG00000031077	Fadd	Fas-(TNFRSF6)-associated-via-death-domain			Hypo
Chr1	180939663	180941441	0.291657	0.0290921	0.52686	Intron-(uc007dvj.1/69726,-intron-10-of-11)	ENSMUSG00000026494	Kif26b	kinesin-family-member-26B		yes	Hyper
Chr17	83564955	83566093	-0.38896	0.0291489	0.526871	Distal-Intergenic	NA	NA	NA			Hypo
Chr7	89896087	89897409	-0.405043	0.0292063	0.526871	Intron-(uc009idf.2/101592,-intron-15-of-19)	ENSMUSG00000038563	Efl1	elongation-factor-like-GPTase-1			Hypo
Chr12	118667382	118668417	-0.502948	0.0292086	0.526871	Distal-Intergenic	NA	NA	NA			Hypo
Chr8	95406866	95408050	-0.358287	0.0294042	0.526871	Intron-(uc009mug.1/270084,-intron-8-of-13)	ENSMUSG00000078144	Capns2	calpain,-small-subunit-2			Hypo
Chr9	47266760	47267771	0.425348	0.0294338	0.526871	Distal-Intergenic	NA	NA	NA			Hyper
Chr11	95059146	95060352	0.402776	0.0294574	0.526871	Distal-Intergenic	NA	NA	NA			Hyper
Chr12	92232301	92233434	0.363404	0.0294587	0.526871	Distal-Intergenic	NA	NA	NA			Hyper
Chr13	52330574	52331686	0.427553	0.0294768	0.526871	Distal-Intergenic	NA	NA	NA			Hyper
Chr3	9255529	9256543	-0.539154	0.0294829	0.526871	Intron-(uc008ooy.2/229055,-intron-1-of-5)	ENSMUSG00000069114	Zbtb10	zinc-finger-and-BTB-domain-containing-10			Hypo
Chr7	105648230	105649254	0.316469	0.0294919	0.526871	3'-UTR	ENSMUSG00000090958	Lrrc32	leucine-rich-repeat-containing-32			Hyper
Chr6	4955546	4956648	0.38228	0.0295153	0.526871	Intron-(uc009avx.1/243725,-intron-2-of-15)	ENSMUSG00000032827	Ppp1r9a	protein-phosphatase-1,-regulatory-(inhibitor)-subunit-9A			Hyper
Chr11	105788663	105789973	-0.343991	0.0296114	0.526871	3'-UTR	ENSMUSG00000019590	Cyb561	cytochrome-b-561		yes	Hypo
Chr14	35765488	35766548	-0.380171	0.0296529	0.526871	Intron-(uc007tbj.1/14803,-intron-3-of-15)	ENSMUSG00000065481	Mir346	microRNA-346			Hypo
Chr8	37999968	38001469	-0.374014	0.0296691	0.526871	Promoter-(<=1kb)	ENSMUSG00000031523	Dlc1	deleted-in-liver-cancer-1		yes	Hypo
Chr11	96711581	96712790	0.418503	0.0296774	0.526871	Promoter-(<=1kb)	ENSMUSG00000065515	Mir152	microRNA-152			Hyper
Chr7	72944548	72945554	0.570365	0.0297566	0.526871	Distal-Intergenic	NA	NA	NA			Hyper
Chr18	5840098	5841102	-0.425752	0.0297617	0.526871	Distal-Intergenic	NA	NA	NA			Hypo
Chr5	123457320	123458353	-0.386677	0.0297706	0.526871	Distal-Intergenic	NA	NA	NA			Hypo
Chr1	155039947	155041167	-0.303923	0.0297985	0.526871	Distal-Intergenic	NA	NA	NA			Hypo
Chr6	134497900	134498931	0.467416	0.0298032	0.526871	Intron-(uc009ekl.2/16974,-intron-1-of-22)	ENSMUSG00000030201	Lrp6	low-density-lipoprotein-receptor-related-protein-6			Hyper
Chr15	25820804	25821904	-0.376778	0.0298283	0.526871	Intron-(uc007vjf.1/66270,-intron-2-of-8)	ENSMUSG00000022270	Retreg1	reticulophagy-regulator-1			Hypo
Chr4	115577669	115579449	-0.387285	0.0298481	0.526871	Distal-Intergenic	NA	NA	NA			Hypo
Chr12	78877446	78878504	0.408242	0.0298679	0.526871	Distal-Intergenic	NA	NA	NA			Hyper
Chr8	129408674	129409910	0.36174	0.0299074	0.526871	Distal-Intergenic	NA	NA	NA			Hyper
Chr12	41400675	41401833	-0.515653	0.0299235	0.526871	Intron-(uc007nle.1/238130,-intron-11-of-12)	ENSMUSG00000035954	Dock4	dedicator-of-cytokinesis-4		yes	Hypo
Chr10	102006996	102008499	0.360814	0.0299347	0.526871	Exon-(uc007gyf.1/237504,-exon-2-of-2)	ENSMUSG00000044921	Rassf9	Ras-association-(RalGDS/AF-6)-domain-family-(N-terminal)-member-9			Hyper
Chr2	20301403	20302611	0.491208	0.029949	0.526871	Intron-(uc008imk.1/208618,-intron-3-of-7)	ENSMUSG00000036617	Etl4	enhancer-trap-locus-4			Hyper
Chr3	116573394	116574460	-0.39903	0.0299547	0.526871	Intron-(uc008rcv.2/20321,-intron-2-of-16)	ENSMUSG00000033386	Frrs1	ferric-chelate-reductase-1		yes	Hypo
Chr3	10329557	10330602	0.367232	0.0300262	0.527585	Promoter-(<=1kb)	ENSMUSG00000027531	Impa1	inositol-(myo)-1(or-4)-monophosphatase-1		yes	Hyper
Chr1	74435333	74436991	0.397717	0.0301332	0.528572	Promoter-(1-2kb)	ENSMUSG00000026176	Ctdsp1	CTD-(carboxy-terminal-domain,-RNA-polymerase-II,-polypeptide-A)-small-phosphatase-1		yes	Hyper
Chr17	83431766	83432890	-0.454728	0.0301745	0.528572	Distal-Intergenic	NA	NA	NA			Hypo
Chr9	99490523	99492366	-0.370013	0.0301843	0.528572	Distal-Intergenic	NA	NA	NA			Hypo
Chr8	48863688	48864762	-0.328853	0.0302071	0.528572	Distal-Intergenic	NA	NA	NA			Hypo
Chr5	123146363	123148762	0.269494	0.0302368	0.528572	Distal-Intergenic	NA	NA	NA			Hyper
Chr11	70002631	70003893	-0.547254	0.0303133	0.529327	Distal-Intergenic	NA	NA	NA			Hypo
Chr1	94267143	94268156	-0.474833	0.0303418	0.529327	Distal-Intergenic	NA	NA	NA			Hypo
Chr10	17280917	17281960	0.467081	0.0304024	0.529843	Distal-Intergenic	NA	NA	NA			Hyper
Chr3	137691893	137693025	0.373977	0.0304882	0.530799	Distal-Intergenic	NA	NA	NA			Hyper
ChrX	148705072	148706373	0.384293	0.030547	0.531282	Exon-(uc009uqc.2/20591,-exon-21-of-26)	ENSMUSG00000025332	Kdm5c	lysine-(K)-specific-demethylase-5C	yes		Hyper
Chr17	33061563	33063285	0.374948	0.0307123	0.533615	3'-UTR	ENSMUSG00000024292	Cyp4f14	cytochrome-P450,-family-4,-subfamily-f,-polypeptide-14			Hyper
Chr11	90280484	90281623	-0.399313	0.0307934	0.534482	Distal-Intergenic	NA	NA	NA			Hypo
Chr9	105298567	105300024	0.367769	0.0308968	0.534826	Promoter-(<=1kb)	ENSMUSG00000032567	Aste1	asteroid-homolog-1			Hyper
Chr15	27392433	27394049	-0.38951	0.0309153	0.534826	Promoter-(2-3kb)	ENSMUSG00000022265	Ank	progressive-ankylosis			Hypo
Chr4	141658182	141659308	0.330024	0.0309474	0.534826	3'-UTR	ENSMUSG00000040616	Tmem51	transmembrane-protein-51			Hyper
Chr2	156158423	156159547	-0.46318	0.0309655	0.534826	Promoter-(<=1kb)	ENSMUSG00000038085	Cnbd2	cyclic-nucleotide-binding-domain-containing-2			Hypo
Chr12	60506892	60508057	-0.530914	0.0310311	0.534826	Distal-Intergenic	NA	NA	NA			Hypo
Chr16	45919071	45920220	0.448617	0.0310658	0.534826	Intron-(uc007zjc.1/208177,-intron-1-of-15)	ENSMUSG00000033149	Phldb2	pleckstrin-homology-like-domain,-family-B,-member-2			Hyper
Chr7	59114449	59115450	0.410452	0.0310828	0.534826	Promoter-(1-2kb)	ENSMUSG00000030498	Gas2	growth-arrest-specific-2		yes	Hyper
Chr10	127546028	127547070	-0.438915	0.0310913	0.534826	Exon-(uc007hlf.1/116848,-exon-3-of-4)	ENSMUSG00000040054	Baz2a	bromodomain-adjacent-to-zinc-finger-domain,-2A			Hypo
Chr5	117048189	117049404	-0.401029	0.0311014	0.534826	Distal-Intergenic	NA	NA	NA			Hypo
Chr14	54702883	54704294	0.379652	0.0311566	0.534826	Intron-(uc007tsk.1/uc007tsk.1,-intron-2-of-3)	ENSMUSG00000022174	Dad1	defender-against-cell-death-1		yes	Hyper
Chr13	108130514	108131602	0.42571	0.031157	0.534826	Distal-Intergenic	NA	NA	NA			Hyper
Chr5	125393047	125394767	0.291725	0.0312025	0.53507	Distal-Intergenic	NA	NA	NA			Hyper
Chr7	26587386	26588903	-0.290627	0.0312882	0.535617	3'-UTR	ENSMUSG00000040703	Cyp2s1	cytochrome-P450,-family-2,-subfamily-s,-polypeptide-1			Hypo
Chr18	57940404	57941772	0.422844	0.031297	0.535617	Distal-Intergenic	NA	NA	NA			Hyper
Chr9	110957812	110958895	0.307705	0.0313968	0.536605	Promoter-(<=1kb)	ENSMUSG00000043953	Ccrl2	chemokine-(C-C-motif)-receptor-like-2			Hyper
Chr10	7785050	7786434	-0.408498	0.0314279	0.536605	Distal-Intergenic	NA	NA	NA			Hypo
Chr14	15896584	15897688	0.479997	0.0314488	0.536605	Distal-Intergenic	NA	NA	NA			Hyper
Chr2	73629971	73630987	-0.349666	0.0314986	0.536727	Distal-Intergenic	NA	NA	NA			Hypo
Chr13	31455088	31456295	-0.493471	0.0315385	0.536727	Intron-(uc011yxz.1/uc011yxz.1,-intron-5-of-6)	ENSMUSG00000038415	Foxq1	forkhead-box-Q1			Hypo
Chr15	73290525	73291638	0.478845	0.03155	0.536727	Distal-Intergenic	NA	NA	NA			Hyper
Chr8	26656869	26658399	0.333602	0.0316007	0.537015	Intron-(uc009lfy.1/14182,-intron-2-of-17)	ENSMUSG00000031565	Fgfr1	fibroblast-growth-factor-receptor-1		yes	Hyper
Chr6	8214014	8215172	-0.506355	0.0316517	0.537015	Intron-(uc009axm.2/100036521,-intron-1-of-3)	ENSMUSG00000029638	Glcci1	glucocorticoid-induced-transcript-1			Hypo
Chr2	104130472	104132221	-0.333014	0.03168	0.537015	Intron-(uc008ljr.1/241589,-intron-1-of-20)	ENSMUSG00000068373	D430041D05Rik	RIKEN-cDNA-D430041D05-gene			Hypo
Chr13	96263741	96265186	0.355069	0.0317328	0.537015	Distal-Intergenic	NA	NA	NA			Hyper
Chr8	126899728	126900929	-0.290083	0.0317396	0.537015	Exon-(uc009nxb.1/209966,-exon-4-of-7)	ENSMUSG00000050751	Pgbd5	piggyBac-transposable-element-derived-5			Hypo
Chr4	117908326	117909355	-0.323132	0.0317555	0.537015	Exon-(uc008ujq.1/19268,-exon-9-of-33)	ENSMUSG00000033295	Ptprf	protein-tyrosine-phosphatase,-receptor-type,-F			Hypo
Chr16	59631506	59632689	-0.426546	0.0318914	0.537015	5'-UTR	ENSMUSG00000022722	Arl6	ADP-ribosylation-factor-like-6			Hypo
Chr10	21445675	21447310	-0.346027	0.0318925	0.537015	Distal-Intergenic	NA	NA	NA			Hypo
Chr4	140171755	140173455	-0.285811	0.0319059	0.537015	5'-UTR	ENSMUSG00000040964	Arhgef10l	Rho-guanine-nucleotide-exchange-factor-(GEF)-10-like		yes	Hypo
Chr2	157882851	157884068	-0.426798	0.0319174	0.537015	Intron-(uc008npm.1/70470,-intron-5-of-6)	ENSMUSG00000027651	Rprd1b	regulation-of-nuclear-pre-mRNA-domain-containing-1B			Hypo
Chr9	78353624	78354974	-0.376905	0.0319284	0.537015	Distal-Intergenic	NA	NA	NA			Hypo
Chr12	8284668	8285697	0.451624	0.0319545	0.537015	Intron-(uc007mzh.2/68832,-intron-6-of-6)	ENSMUSG00000037660	Gdf7	growth-differentiation-factor-7			Hyper
Chr15	85060482	85061574	0.329918	0.0319749	0.537015	Exon-(uc007xdb.2/14114,-exon-6-of-15)	ENSMUSG00000006369	Fbln1	fibulin-1		yes	Hyper
Chr5	106356422	106357502	-0.356036	0.0320068	0.537024	Distal-Intergenic	NA	NA	NA			Hypo
Chr17	57075071	57076944	-0.327335	0.0320466	0.537165	Promoter-(<=1kb)	ENSMUSG00000024212	Mllt1	myeloid/lymphoid-or-mixed-lineage-leukemia;-translocated-to,-1			Hypo
Chr7	134415483	134416779	-0.362827	0.032107	0.53765	Promoter-(<=1kb)	ENSMUSG00000049091	Sephs2	selenophosphate-synthetase-2			Hypo
Chr1	13566214	13567435	0.396723	0.0321729	0.537737	Exon-(uc007ait.1/72265,-exon-6-of-11)	ENSMUSG00000025935	Tram1	translocating-chain-associating-membrane-protein-1			Hyper
Chr5	102496191	102497191	0.346906	0.0322121	0.537737	Promoter-(1-2kb)	ENSMUSG00000043940	Wdfy3	WD-repeat-and-FYVE-domain-containing-3	yes		Hyper
Chr15	81021758	81022787	0.4406	0.0322434	0.537737	Promoter-(<=1kb)	ENSMUSG00000047938	4930483J18Rik	RIKEN-cDNA-4930483J18-gene			Hyper
Chr4	35027340	35028364	-0.496684	0.0323465	0.537737	Intron-(uc008sgs.1/214944,-intron-2-of-3)	ENSMUSG00000042993	Ifnk	interferon-kappa			Hypo
Chr19	42179069	42180377	0.530789	0.0323641	0.537737	Exon-(uc008hnf.1/84095,-exon-3-of-10)	ENSMUSG00000025178	Pi4k2a	phosphatidylinositol-4-kinase-type-2-alpha		yes	Hyper
Chr5	24217671	24219082	-0.286302	0.0323895	0.537737	3'-UTR	ENSMUSG00000055235	Wdr86	WD-repeat-domain-86			Hypo
Chr5	118968197	118969428	-0.410086	0.0323968	0.537737	Distal-Intergenic	NA	NA	NA			Hypo
Chr8	49002158	49003392	-0.355245	0.0324076	0.537737	Intron-(uc009lrm.1/52357,-intron-2-of-22)	ENSMUSG00000031563	Wwc2	WW,-C2-and-coiled-coil-domain-containing-2			Hypo
Chr19	57784591	57786222	0.351722	0.0324806	0.537737	Intron-(uc008iai.2/226255,-intron-18-of-28)	ENSMUSG00000054843	Atrnl1	attractin-like-1			Hyper
Chr14	32858441	32859444	0.401856	0.0324939	0.537737	Intron-(uc007syb.1/78754,-intron-3-of-9)	ENSMUSG00000021903	Galnt15	polypeptide-N-acetylgalactosaminyltransferase-15			Hyper
Chr6	83317671	83318767	-0.284429	0.0325939	0.537737	3'-UTR	ENSMUSG00000045160	Bola3	bolA-like-3-(E.-coli)			Hypo
Chr17	8453189	8454196	-0.435131	0.0326007	0.537737	Distal-Intergenic	NA	NA	NA			Hypo
Chr17	10934987	10936199	-0.393552	0.0326487	0.537737	Intron-(uc008akg.1/69310,-intron-2-of-4)	ENSMUSG00000037196	Pacrg	PARK2-co-regulated		yes	Hypo
Chr13	118840663	118842198	0.394758	0.0326538	0.537737	Distal-Intergenic	NA	NA	NA			Hyper
Chr8	37298967	37300572	-0.285312	0.0326697	0.537737	Exon-(uc009llj.1/244421,-exon-2-of-12)	ENSMUSG00000039633	Lonrf1	LON-peptidase-N-terminal-domain-and-ring-finger-1			Hypo
Chr6	88824962	88826132	0.498963	0.0327454	0.537737	Promoter-(<=1kb)	ENSMUSG00000033152	Podxl2	podocalyxin-like-2			Hyper
Chr7	134356909	134358940	-0.276935	0.0327771	0.537737	Promoter-(1-2kb)	ENSMUSG00000030672	Mylpf	myosin-light-chain,-phosphorylatable,-fast-skeletal-muscle			Hypo
Chr11	52541561	52542717	0.437526	0.0328719	0.537737	Distal-Intergenic	NA	NA	NA			Hyper
Chr18	20768592	20770120	-0.336561	0.0328784	0.537737	Distal-Intergenic	NA	NA	NA			Hypo
Chr17	56134958	56136275	-0.289229	0.0328866	0.537737	3'-UTR	ENSMUSG00000038781	Stap2	signal-transducing-adaptor-family-member-2			Hypo
Chr13	52178429	52180115	0.3375	0.0328942	0.537737	Distal-Intergenic	NA	NA	NA			Hyper
Chr18	61417201	61418370	0.410864	0.0329272	0.537737	Exon-(uc008fbv.1/225600,-exon-13-of-22)	ENSMUSG00000024575	Pde6a	phosphodiesterase-6A,-cGMP-specific,-rod,-alpha			Hyper
Chr12	85292565	85293700	-0.356294	0.0329612	0.537737	Promoter-(1-2kb)	ENSMUSG00000046791	Riox1	ribosomal-oxygenase-1			Hypo
Chr2	49635059	49636228	-0.392901	0.0329702	0.537737	Distal-Intergenic	NA	NA	NA			Hypo
Chr18	75148826	75150072	0.333618	0.0329816	0.537737	Distal-Intergenic	NA	NA	NA			Hyper
Chr19	56913296	56914506	0.385007	0.0330121	0.537737	Exon-(uc008hzi.1/83561,-exon-5-of-26)	ENSMUSG00000025081	Tdrd1	tudor-domain-containing-1			Hyper
Chr3	86628044	86629145	-0.430256	0.0330485	0.537737	Exon-(uc008prl.3/70762,-exon-5-of-16)	ENSMUSG00000028078	Dclk2	doublecortin-like-kinase-2			Hypo
Chr18	5615705	5616911	0.537941	0.0330629	0.537737	Intron-(uc008dyx.1/21417,-intron-1-of-1)	ENSMUSG00000024238	Zeb1	zinc-finger-E-box-binding-homeobox-1		yes	Hyper
Chr8	91359495	91360533	-0.386563	0.0330666	0.537737	Distal-Intergenic	NA	NA	NA			Hypo
Chr6	144850559	144851829	-0.283452	0.0330702	0.537737	Distal-Intergenic	NA	NA	NA			Hypo
Chr17	35728372	35729919	-0.335239	0.033098	0.537737	Distal-Intergenic	NA	NA	NA			Hypo
Chr3	36565078	36566084	-0.511244	0.0331176	0.537737	Intron-(uc012cow.1/22065,-intron-1-of-9)	ENSMUSG00000027716	Trpc3	transient-receptor-potential-cation-channel,-subfamily-C,-member-3		yes	Hypo
Chr7	119538633	119539840	-0.440108	0.0331635	0.537972	Intron-(uc012fsg.1/100504195,-intron-6-of-9)	ENSMUSG00000030771	Micalcl	MICAL-C-terminal-like			Hypo
Chr11	70429625	70431275	0.292936	0.0332297	0.538065	Promoter-(<=1kb)	ENSMUSG00000087279	4930544D05Rik	RIKEN-cDNA-4930544D05-gene			Hyper
Chr7	86991950	86993131	-0.417958	0.0332321	0.538065	Promoter-(<=1kb)	ENSMUSG00000039062	Anpep	alanyl-(membrane)-aminopeptidase		yes	Hypo
Chr10	126944473	126945570	-0.37139	0.0333149	0.538895	3'-UTR	ENSMUSG00000040287	Stac3	SH3-and-cysteine-rich-domain-3			Hypo
Chr3	28594437	28596388	0.341722	0.0335381	0.539731	Promoter-(<=1kb)	ENSMUSG00000027690	Slc2a2	solute-carrier-family-2-(facilitated-glucose-transporter),-member-2		yes	Hyper
Chr6	136466188	136467348	-0.565315	0.0335442	0.539731	Promoter-(<=1kb)	ENSMUSG00000030213	Atf7ip	activating-transcription-factor-7-interacting-protein		yes	Hypo
Chr6	127323578	127324911	0.334464	0.0336314	0.539731	Distal-Intergenic	NA	NA	NA			Hyper
Chr2	166107635	166108664	0.410167	0.0336573	0.539731	Intron-(uc012cjj.1/670775,-intron-1-of-2)	ENSMUSG00000084840	Gm11468	predicted-gene-11468			Hyper
Chr14	70935543	70936959	0.30084	0.0336927	0.539731	5'-UTR	ENSMUSG00000033595	Lgi3	leucine-rich-repeat-LGI-family,-member-3			Hyper
Chr5	33714861	33716078	0.359431	0.0337634	0.539731	3'-UTR	ENSMUSG00000037355	Uvssa	UV-stimulated-scaffold-protein-A			Hyper
Chr2	129341187	129342503	-0.297629	0.0338517	0.539731	Promoter-(<=1kb)	ENSMUSG00000043727	F830045P16Rik	RIKEN-cDNA-F830045P16-gene			Hypo
Chr4	56851004	56852020	-0.319048	0.0338873	0.539731	Promoter-(<=1kb)	ENSMUSG00000038816	Ctnnal1	catenin-(cadherin-associated-protein),-alpha-like-1			Hypo
Chr1	120289669	120290806	0.488311	0.0339266	0.539731	Intron-(uc007cid.1/76707,-intron-1-of-11)	ENSMUSG00000064302	Clasp1	CLIP-associating-protein-1		yes	Hyper
Chr13	97359600	97360870	-0.411254	0.0339324	0.539731	Intron-(uc007rni.2/68018,-intron-3-of-6)	ENSMUSG00000021669	Col4a3bp	collagen,-type-IV,-alpha-3-(Goodpasture-antigen)-binding-protein		yes	Hypo
Chr7	145156130	145157348	0.41811	0.0339374	0.539731	Distal-Intergenic	NA	NA	NA			Hyper
Chr19	16397800	16398852	0.393964	0.0339379	0.539731	Intron-(uc008gwt.1/14682,-intron-3-of-6)	ENSMUSG00000024697	Gna14	guanine-nucleotide-binding-protein,-alpha-14			Hyper
Chr2	27030676	27031831	-0.340444	0.0339676	0.539731	Intron-(uc008ixe.1/13166,-intron-6-of-11)	ENSMUSG00000000889	Dbh	dopamine-beta-hydroxylase		yes	Hypo
Chr11	59325976	59326981	-0.459711	0.0339898	0.539731	Distal-Intergenic	NA	NA	NA			Hypo
Chr11	69357488	69358931	0.356537	0.0340114	0.539731	5'-UTR	ENSMUSG00000005237	Dnah2	dynein,-axonemal,-heavy-chain-2			Hyper
Chr9	36685726	36686753	-0.532065	0.0340156	0.539731	3'-UTR	ENSMUSG00000032118	Fez1	fasciculation-and-elongation-protein-zeta-1-(zygin-I)		yes	Hypo
Chr11	66380581	66381754	-0.384232	0.0340353	0.539731	Distal-Intergenic	NA	NA	NA			Hypo
Chr15	55107301	55108799	0.418042	0.0340579	0.539731	Distal-Intergenic	NA	NA	NA			Hyper
Chr6	28915384	28916444	0.466117	0.0340636	0.539731	Distal-Intergenic	NA	NA	NA			Hyper
Chr5	73900961	73902008	0.335247	0.0340741	0.539731	Intron-(uc008xsy.2/100737,-intron-2-of-11)	ENSMUSG00000051674	Dcun1d4	DCN1,-defective-in-cullin-neddylation-1,-domain-containing-4-(S.-cerevisiae)			Hyper
Chr8	8548854	8549943	0.55481	0.0340755	0.539731	Distal-Intergenic	NA	NA	NA			Hyper
Chr17	27836438	27837946	-0.313354	0.0341516	0.539731	Intron-(uc008bpj.1/23969,-intron-1-of-9)	ENSMUSG00000040276	Pacsin1	protein-kinase-C-and-casein-kinase-substrate-in-neurons-1			Hypo
Chr9	91547012	91548208	0.479307	0.0342021	0.539731	Distal-Intergenic	NA	NA	NA			Hyper
Chr1	80935673	80937009	0.46316	0.0342171	0.539731	Distal-Intergenic	NA	NA	NA			Hyper
Chr16	32129368	32131276	-0.33174	0.0342207	0.539731	Distal-Intergenic	NA	NA	NA			Hypo
Chr19	38919780	38920949	0.422207	0.0342535	0.539731	Intron-(uc008hjs.1/209478,-intron-1-of-12)	ENSMUSG00000048720	Tbc1d12	TBC1D12:-TBC1-domain-family,-member-12			Hyper
Chr9	119213426	119215061	0.322947	0.034255	0.539731	Promoter-(<=1kb)	ENSMUSG00000036737	Oxsr1	oxidative-stress-responsive-1		yes	Hyper
Chr9	114424122	114425675	-0.33596	0.0342574	0.539731	Exon-(uc009rxp.1/636931,-exon-3-of-4)	ENSMUSG00000047898	Ccr4	chemokine-(C-C-motif)-receptor-4			Hypo
Chr2	129706131	129707470	-0.406787	0.0342811	0.539731	Distal-Intergenic	NA	NA	NA			Hypo
Chr13	113042527	113043630	0.347894	0.034346	0.540126	Distal-Intergenic	NA	NA	NA			Hyper
Chr3	121486648	121487739	0.46184	0.0343694	0.540126	Exon-(uc008reg.1/19299,-exon-6-of-23)	ENSMUSG00000028127	Abcd3	ATP-binding-cassette,-sub-family-D-(ALD),-member-3		yes	Hyper
Chr1	34488206	34489801	-0.444826	0.0344025	0.540151	Distal-Intergenic	NA	NA	NA			Hypo
Chr1	138534236	138535403	0.344692	0.0344773	0.540829	Distal-Intergenic	NA	NA	NA			Hyper
Chr6	114287291	114288402	-0.40775	0.0345277	0.541124	Distal-Intergenic	NA	NA	NA			Hypo
Chr8	113366251	113367338	0.432963	0.0346405	0.541869	Exon-(uc009nlb.1/101943,-exon-3-of-26)	ENSMUSG00000031753	Cog4	component-of-oligomeric-golgi-complex-4			Hyper
Chr6	54893213	54894937	-0.249225	0.0346513	0.541869	Exon-(uc009caf.2/107607,-exon-4-of-12)	ENSMUSG00000038058	Nod1	nucleotide-binding-oligomerization-domain-containing-1		yes	Hypo
Chr15	12755256	12756448	-0.424161	0.0346813	0.541869	Promoter-(<=1kb)	ENSMUSG00000022191	Drosha	drosha,-ribonuclease-type-III		yes	Hypo
Chr1	72914950	72916196	0.40957	0.0347019	0.541869	Intron-(uc007bkx.1/16011,-intron-1-of-3)	ENSMUSG00000026185	Igfbp5	insulin-like-growth-factor-binding-protein-5		yes	Hyper
Chr12	16277354	16278390	-0.469823	0.0347679	0.542405	Distal-Intergenic	NA	NA	NA			Hypo
Chr15	8690819	8692497	-0.388067	0.0348153	0.542526	Distal-Intergenic	NA	NA	NA			Hypo
Chr15	101891772	101892789	-0.428239	0.0348391	0.542526	Distal-Intergenic	NA	NA	NA			Hypo
Chr8	129467280	129468466	-0.365063	0.0348921	0.542555	Promoter-(1-2kb)	ENSMUSG00000093904	Tomm20	translocase-of-outer-mitochondrial-membrane-20-homolog-(yeast)		yes	Hypo
Chr11	68174642	68176033	0.352436	0.0349174	0.542555	Intron-(uc007jnm.1/18208,-intron-2-of-6)	ENSMUSG00000020902	Ntn1	netrin-1			Hyper
Chr19	46397401	46399806	0.299564	0.0349386	0.542555	Promoter-(<=1kb)	ENSMUSG00000037126	Psd	pleckstrin-and-Sec7-domain-containing			Hyper
Chr6	84757095	84758235	0.399331	0.0349977	0.542555	Intron-(uc009cpa.2/75914,-intron-18-of-21)	ENSMUSG00000063415	Cyp26b1	cytochrome-P450,-family-26,-subfamily-b,-polypeptide-1		yes	Hyper
Chr7	29705961	29707301	0.317335	0.0349994	0.542555	Intron-(uc009gah.1/60595,-intron-1-of-20)	ENSMUSG00000054083	Capn12	calpain-12	yes		Hyper
Chr14	34957845	34958905	0.455751	0.0350372	0.542649	3'-UTR	ENSMUSG00000048337	Npy4r	neuropeptide-Y-receptor-Y4			Hyper
Chr1	90773851	90775245	-0.372168	0.0350922	0.543009	Distal-Intergenic	NA	NA	NA			Hypo
Chr15	88118213	88119379	-0.408356	0.035129	0.54302	Intron-(uc007xeg.1/uc007xeg.1,-intron-1-of-2)	ENSMUSG00000054117	Zdhhc25	zinc-finger,-DHHC-domain-containing-25			Hypo
Chr16	89492460	89493540	0.432742	0.0352218	0.54302	Distal-Intergenic	NA	NA	NA			Hyper
Chr15	93333129	93334504	0.296567	0.0352317	0.54302	Exon-(uc007xja.1/106042,-exon-7-of-8)	ENSMUSG00000036158	Prickle1	prickle-planar-cell-polarity-protein-1			Hyper
Chr1	84302253	84303458	-0.375009	0.0352339	0.54302	Intron-(uc007bsu.1/98496,-intron-2-of-4)	ENSMUSG00000045658	Pid1	phosphotyrosine-interaction-domain-containing-1		yes	Hypo
Chr1	30903814	30904923	0.479439	0.0352516	0.54302	Intron-(uc007ane.1/213109,-intron-1-of-14)	ENSMUSG00000048874	Phf3	PHD-finger-protein-3			Hyper
Chr6	72338030	72339766	-0.381947	0.0354292	0.544226	Promoter-(<=1kb)	ENSMUSG00000050732	Vamp8	vesicle-associated-membrane-protein-8			Hypo
Chr11	89412228	89413308	-0.483713	0.0354346	0.544226	Distal-Intergenic	NA	NA	NA			Hypo
Chr15	85404820	85406059	-0.348716	0.0354411	0.544226	Promoter-(2-3kb)	ENSMUSG00000022382	Wnt7b	wingless-type-MMTV-integration-site-family,-member-7B			Hypo
Chr12	118375981	118377049	0.387653	0.0354571	0.544226	Intron-(uc007phx.2/19276,-intron-12-of-22)	ENSMUSG00000099907	Gm10421	predicted-gene-10421			Hyper
Chr17	46658690	46659705	0.340715	0.0355474	0.545066	Promoter-(1-2kb)	ENSMUSG00000040327	Cul9	cullin-9			Hyper
Chr1	22287086	22288283	-0.412698	0.0355901	0.545066	Intron-(uc007alr.1/116837,-intron-1-of-5)	ENSMUSG00000041670	Rims1	regulating-synaptic-membrane-exocytosis-1	yes		Hypo
Chr18	61696176	61697443	0.398418	0.0356357	0.545066	Promoter-(<=1kb)	ENSMUSG00000045094	Arhgef37	Rho-guanine-nucleotide-exchange-factor-(GEF)-37		yes	Hyper
Chr13	73427554	73428881	0.407071	0.0356392	0.545066	Distal-Intergenic	NA	NA	NA			Hyper
Chr13	99199353	99200424	-0.398693	0.0357753	0.545474	Distal-Intergenic	NA	NA	NA			Hypo
Chr7	19990880	19991985	0.487383	0.0358013	0.545474	Promoter-(1-2kb)	ENSMUSG00000040714	Klc3	kinesin-light-chain-3			Hyper
Chr7	17623671	17625327	0.354831	0.0358305	0.545474	Exon-(uc009fir.2/53417,-exon-13-of-15)	ENSMUSG00000003099	Ppp5c	protein-phosphatase-5,-catalytic-subunit		yes	Hyper
Chr6	146086490	146087562	0.366823	0.035872	0.545474	Intron-(uc009erw.1/16439,-intron-55-of-56)	ENSMUSG00000030255	Sspn	sarcospan			Hyper
Chr7	90781255	90782984	0.358902	0.0359214	0.545474	Promoter-(<=1kb)	ENSMUSG00000046027	Stard5	StAR-related-lipid-transfer-(START)-domain-containing-5		yes	Hyper
Chr1	172488841	172490053	-0.351752	0.0359348	0.545474	Promoter-(1-2kb)	ENSMUSG00000038473	Nos1ap	nitric-oxide-synthase-1-(neuronal)-adaptor-protein		yes	Hypo
Chr6	94668243	94669275	-0.403811	0.035968	0.545474	Distal-Intergenic	NA	NA	NA			Hypo
Chr18	12201797	12202862	0.543402	0.0359976	0.545474	Exon-(uc008ebw.1/338363,-exon-13-of-15)	ENSMUSG00000049411	Tmem241	transmembrane-protein-241			Hyper
Chr18	55411361	55412382	-0.407676	0.0360182	0.545474	Distal-Intergenic	NA	NA	NA			Hypo
Chr5	32494314	32495433	-0.479311	0.0360205	0.545474	Distal-Intergenic	NA	NA	NA			Hypo
Chr18	75582358	75583524	-0.341153	0.0360376	0.545474	Distal-Intergenic	NA	NA	NA			Hypo
Chr1	43618038	43619168	-0.378218	0.0360483	0.545474	Intron-(uc007avo.2/17974,-intron-4-of-4)	ENSMUSG00000066877	Nck2	non-catalytic-region-of-tyrosine-kinase-adaptor-protein-2		yes	Hypo
Chr14	55125993	55127203	0.388808	0.0362388	0.547288	3'-UTR	ENSMUSG00000023110	Prmt5	protein-arginine-N-methyltransferase-5		yes	Hyper
Chr10	99022606	99024130	-0.338951	0.0362559	0.547288	Distal-Intergenic	NA	NA	NA			Hypo
Chr3	103178797	103179840	-0.482992	0.0362711	0.547288	Distal-Intergenic	NA	NA	NA			Hypo
Chr1	180786670	180787699	0.439505	0.0363225	0.547288	Intron-(uc007dvh.2/269152,-intron-5-of-14)	ENSMUSG00000026494	Kif26b	kinesin-family-member-26B		yes	Hyper
Chr5	130291511	130292524	0.451242	0.0363281	0.547288	Promoter-(<=1kb)	ENSMUSG00000029446	Psph	phosphoserine-phosphatase			Hyper
Chr13	98015310	98016316	-0.375145	0.0363859	0.54732	Exon-(uc007rod.2/13803,-exon-2-of-3)	ENSMUSG00000041773	Enc1	ectodermal-neural-cortex-1		yes	Hypo
Chr6	53099236	53100315	0.552345	0.0363942	0.54732	Distal-Intergenic	NA	NA	NA			Hyper
Chr15	61720860	61721973	0.447683	0.0364557	0.547598	Distal-Intergenic	NA	NA	NA			Hyper
Chr5	112465556	112466594	0.515172	0.0365036	0.547598	Distal-Intergenic	NA	NA	NA			Hyper
Chr11	5268704	5269818	0.454954	0.0365354	0.547598	Intron-(uc007hwj.2/407821,-intron-1-of-8)	ENSMUSG00000041961	Znrf3	zinc-and-ring-finger-3			Hyper
Chr7	149670297	149671400	0.434021	0.0365501	0.547598	Exon-(uc009knb.2/16985,-exon-2-of-11)	ENSMUSG00000018819	Lsp1	lymphocyte-specific-1			Hyper
Chr14	119616224	119617741	0.379522	0.0365759	0.547598	Intron-(uc007uzn.2/50787,-intron-1-of-1)	ENSMUSG00000053465	Hs6st3	heparan-sulfate-6-O-sulfotransferase-3		yes	Hyper
Chr7	106828690	106830162	0.353307	0.0366157	0.547598	Intron-(uc009ilw.1/101488,-intron-7-of-13)	ENSMUSG00000030737	Slco2b1	solute-carrier-organic-anion-transporter-family,-member-2b1			Hyper
Chr9	59829318	59831131	0.308751	0.0366488	0.547598	Exon-(uc009pyx.2/207596,-exon-9-of-12)	ENSMUSG00000032289	Thsd4	thrombospondin,-type-I,-domain-containing-4			Hyper
Chr5	149135757	149137215	0.472127	0.0366735	0.547598	Downstream-(1-2kb)	ENSMUSG00000029651	Mtus2	microtubule-associated-tumor-suppressor-candidate-2			Hyper
Chr1	37098444	37100107	-0.326996	0.0367123	0.547598	Exon-(uc007are.1/uc007are.1,-exon-3-of-7)	ENSMUSG00000026116	Tmem131	transmembrane-protein-131			Hypo
Chr15	74578014	74579188	0.343449	0.0367326	0.547598	Promoter-(<=1kb)	ENSMUSG00000075605	Slurp2	secreted-Ly6/Plaur-domain-containing-2			Hyper
Chr4	120400212	120401352	0.342146	0.0367868	0.547835	Intron-(uc008unm.1/60613,-intron-1-of-13)	ENSMUSG00000028631	Kcnq4	potassium-voltage-gated-channel,-subfamily-Q,-member-4			Hyper
Chr7	121149420	121150659	-0.359606	0.0368607	0.547835	Intron-(uc009jhv.2/233744,-intron-6-of-15)	ENSMUSG00000055723	Rras2	related-RAS-viral-(r-ras)-oncogene-2			Hypo
Chr5	137823479	137824528	-0.366368	0.0368705	0.547835	Exon-(uc012eey.1/22635,-exon-83-of-88)	ENSMUSG00000029710	Ephb4	Eph-receptor-B4		yes	Hypo
Chr2	131175812	131176961	0.442622	0.0368766	0.547835	Promoter-(1-2kb)	ENSMUSG00000048911	Rnf24	ring-finger-protein-24			Hyper
Chr18	25065593	25066967	-0.362898	0.0370349	0.54788	Intron-(uc008ehb.1/225288,-intron-5-of-26)	ENSMUSG00000034295	Fhod3	formin-homology-2-domain-containing-3		yes	Hypo
Chr1	157415013	157416121	0.397122	0.037047	0.54788	Intron-(uc007dbk.2/72482,-intron-3-of-3)	ENSMUSG00000033701	Acbd6	acyl-Coenzyme-A-binding-domain-containing-6		yes	Hyper
Chr4	119902237	119903353	0.350542	0.0370561	0.54788	Distal-Intergenic	NA	NA	NA			Hyper
Chr16	50167751	50168974	-0.333812	0.0370584	0.54788	Distal-Intergenic	NA	NA	NA			Hypo
Chr7	35340463	35341666	0.324792	0.0371021	0.54788	Distal-Intergenic	NA	NA	NA			Hyper
Chr2	25100983	25102110	-0.336659	0.0371144	0.54788	Promoter-(2-3kb)	ENSMUSG00000044628	Rnf208	ring-finger-protein-208			Hypo
Chr10	74795552	74797783	-0.257732	0.0371216	0.54788	3'-UTR	ENSMUSG00000020178	Adora2a	adenosine-A2a-receptor		yes	Hypo
Chr2	71093873	71095467	0.299584	0.0371542	0.54788	Intron-(uc008kah.2/13427,-intron-14-of-16)	ENSMUSG00000027012	Dync1i2	dynein-cytoplasmic-1-intermediate-chain-2		yes	Hyper
Chr6	92652473	92653572	-0.395223	0.0371714	0.54788	Promoter-(2-3kb)	ENSMUSG00000030020	Prickle2	prickle-planar-cell-polarity-protein-2		yes	Hypo
Chr13	45789825	45790935	0.301537	0.0372387	0.54788	Intron-(uc011yyv.1/20238,-intron-6-of-7)	ENSMUSG00000000253	Gmpr	guanosine-monophosphate-reductase		yes	Hyper
Chr6	92833232	92834342	0.398002	0.037287	0.54788	Intron-(uc009czb.2/101401,-intron-6-of-29)	ENSMUSG00000030022	Adamts9	a-disintegrin-like-and-metallopeptidase-(reprolysin-type)-with-thrombospondin-type-1-motif,-9		yes	Hyper
Chr7	117920687	117921736	0.370359	0.0372877	0.54788	5'-UTR	ENSMUSG00000005686	Ampd3	adenosine-monophosphate-deaminase-3		yes	Hyper
Chr19	12041211	12042653	0.358519	0.0372958	0.54788	Promoter-(<=1kb)	ENSMUSG00000024687	Osbp	oxysterol-binding-protein			Hyper
Chr12	104752787	104753889	-0.431395	0.0374514	0.549694	Distal-Intergenic	NA	NA	NA			Hypo
Chr2	24479745	24480846	0.391946	0.0374849	0.549714	Exon-(uc008ipe.1/12287,-exon-38-of-47)	ENSMUSG00000004113	Cacna1b	calcium-channel,-voltage-dependent,-N-type,-alpha-1B-subunit		yes	Hyper
Chr11	109157756	109158767	0.429542	0.0375701	0.550493	Promoter-(<=1kb)	ENSMUSG00000020599	Rgs9	regulator-of-G-protein-signaling-9		yes	Hyper
Chr8	129575136	129576276	-0.362481	0.0376232	0.550798	Distal-Intergenic	NA	NA	NA			Hypo
Chr18	70637574	70639289	-0.353627	0.0376981	0.550881	Intron-(uc008fog.1/170461,-intron-5-of-8)	ENSMUSG00000079608	Stard6	StAR-related-lipid-transfer-(START)-domain-containing-6			Hypo
Chr19	32403560	32404885	0.404875	0.037723	0.550881	Intron-(uc008hff.2/208449,-intron-1-of-9)	ENSMUSG00000040451	Sgms1	sphingomyelin-synthase-1		yes	Hyper
Chr4	151615503	151616675	-0.306787	0.0378425	0.550881	Intron-(uc008vzx.2/70025,-intron-6-of-8)	ENSMUSG00000028937	Acot7	acyl-CoA-thioesterase-7			Hypo
Chr2	18596932	18598028	0.463765	0.0378425	0.550881	Promoter-(<=1kb)	ENSMUSG00000026739	Bmi1	Bmi1-polycomb-ring-finger-oncogene		yes	Hyper
Chr2	13979031	13980161	-0.535532	0.0378636	0.550881	Promoter-(1-2kb)	ENSMUSG00000063275	Hacd1	3-hydroxyacyl-CoA-dehydratase-1			Hypo
Chr12	106677493	106678638	0.360007	0.0378897	0.550881	Distal-Intergenic	NA	NA	NA			Hyper
Chr17	46772126	46774111	-0.300268	0.0379169	0.550881	Exon-(uc008ctj.1/74764,-exon-7-of-16)	ENSMUSG00000023972	Ptk7	PTK7-protein-tyrosine-kinase-7		yes	Hypo
Chr2	4228548	4229573	-0.43575	0.0379433	0.550881	Intron-(uc008ieo.2/209630,-intron-1-of-22)	ENSMUSG00000026657	Frmd4a	FERM-domain-containing-4A		yes	Hypo
Chr4	135245672	135246711	-0.367796	0.0380166	0.550881	Exon-(uc008vgw.2/242700,-exon-2-of-7)	ENSMUSG00000062157	Ifnlr1	interferon-lambda-receptor-1			Hypo
Chr9	32475954	32476987	0.423664	0.0380355	0.550881	Intron-(uc009osa.1/23871,-intron-3-of-3)	ENSMUSG00000032035	Ets1	E26-avian-leukemia-oncogene-1,-5'-domain		yes	Hyper
Chr15	83745124	83746369	0.392769	0.0380405	0.550881	Intron-(uc007xbp.2/77627,-intron-2-of-12)	ENSMUSG00000022441	Efcab6	EF-hand-calcium-binding-domain-6			Hyper
Chr14	46150832	46152166	0.348996	0.0380499	0.550881	Promoter-(1-2kb)	ENSMUSG00000037712	Fermt2	fermitin-family-member-2		yes	Hyper
Chr6	126928250	126929376	-0.358266	0.0381198	0.550881	Distal-Intergenic	NA	NA	NA			Hypo
Chr11	101017579	101018600	0.513642	0.038141	0.550881	Promoter-(<=1kb)	ENSMUSG00000045007	Tubg2	tubulin,-gamma-2			Hyper
Chr13	12461829	12463345	-0.356339	0.0381485	0.550881	Distal-Intergenic	NA	NA	NA			Hypo
Chr3	147743524	147744667	0.442231	0.0381762	0.550881	Distal-Intergenic	NA	NA	NA			Hyper
Chr5	130622572	130624113	-0.330702	0.0381834	0.550881	Promoter-(1-2kb)	ENSMUSG00000034110	Kctd7	potassium-channel-tetramerisation-domain-containing-7			Hypo
Chr11	20494056	20496145	-0.286738	0.0382082	0.550881	5'-UTR	ENSMUSG00000049800	Sertad2	SERTA-domain-containing-2			Hypo
Chr9	78433252	78434642	-0.302902	0.0382858	0.551462	Promoter-(1-2kb)	ENSMUSG00000049624	Slc17a5	solute-carrier-family-17-(anion/sugar-transporter),-member-5		yes	Hypo
Chr4	128408095	128409286	-0.323776	0.0383538	0.551462	Intron-(uc008uvi.2/54383,-intron-9-of-14)	ENSMUSG00000028796	Phc2	polyhomeotic-2		yes	Hypo
Chr11	49065207	49066249	0.398125	0.0383742	0.551462	Promoter-(1-2kb)	ENSMUSG00000020346	Mgat1	mannoside-acetylglucosaminyltransferase-1			Hyper
Chr3	68779790	68781260	0.356596	0.0384213	0.551462	Intron-(uc008plx.2/68259,-intron-5-of-19)	ENSMUSG00000027778	Ift80	intraflagellar-transport-80			Hyper
Chr7	142701565	142702598	0.511178	0.0384399	0.551462	Downstream-(<1kb)	ENSMUSG00000050866	Clrn3	clarin-3			Hyper
Chr15	83295050	83296144	-0.462761	0.0384418	0.551462	Promoter-(<=1kb)	ENSMUSG00000016664	Pacsin2	protein-kinase-C-and-casein-kinase-substrate-in-neurons-2			Hypo
Chr3	40425335	40426759	-0.331838	0.0385126	0.551906	Distal-Intergenic	NA	NA	NA			Hypo
Chr14	115476659	115478564	-0.319594	0.0385373	0.551906	Distal-Intergenic	NA	NA	NA			Hypo
Chr5	4227918	4229180	-0.396171	0.0386044	0.552144	Distal-Intergenic	NA	NA	NA			Hypo
Chr19	14527516	14528540	-0.504355	0.0386582	0.552144	Exon-(uc008gwk.1/21888,-exon-16-of-20)	ENSMUSG00000024642	Tle4	transducin-like-enhancer-of-split-4		yes	Hypo
Chr10	83906759	83907990	0.305256	0.0386834	0.552144	Distal-Intergenic	NA	NA	NA			Hyper
Chr5	35356645	35357872	-0.294056	0.0387512	0.552144	Intron-(uc008xdf.2/71729,-intron-4-of-4)	ENSMUSG00000093097	Mir3097	microRNA-3097			Hypo
Chr14	58180477	58181483	-0.407125	0.0387812	0.552144	Intron-(uc007udd.1/68043,-intron-2-of-4)	ENSMUSG00000021951	Eef1akmt1	EEF1A-alpha-lysine-methyltransferase-1			Hypo
Chr14	52824386	52825448	-0.397877	0.038907	0.552144	Exon-(uc007tos.1/uc007tos.1,-exon-2-of-4)	ENSMUSG00000093044	Snord8	small-nucleolar-RNA,-C/D-box-8			Hypo
Chr11	22772436	22773454	0.37583	0.0389306	0.552144	Intron-(uc007iej.2/53625,-intron-1-of-1)	ENSMUSG00000051650	B3gnt2	UDP-GlcNAc:betaGal-beta-1,3-N-acetylglucosaminyltransferase-2		yes	Hyper
Chr15	82188788	82189869	0.395415	0.038934	0.552144	Distal-Intergenic	NA	NA	NA			Hyper
Chr1	60563472	60564539	-0.47199	0.0390001	0.552144	Intron-(uc007bes.1/77300,-intron-6-of-15)	ENSMUSG00000026014	Raph1	Ras-association-(RalGDS/AF-6)-and-pleckstrin-homology-domains-1			Hypo
Chr3	152439092	152440290	0.300603	0.0390914	0.552144	Intron-(uc012czn.1/329777,-intron-11-of-11)	ENSMUSG00000039047	Pigk	phosphatidylinositol-glycan-anchor-biosynthesis,-class-K			Hyper
Chr2	75446146	75447225	-0.345023	0.0391031	0.552144	Distal-Intergenic	NA	NA	NA			Hypo
Chr9	102312653	102313681	0.311919	0.0391241	0.552144	Distal-Intergenic	NA	NA	NA			Hyper
Chr8	42279038	42280220	0.463713	0.0391403	0.552144	Intron-(uc009lnp.2/234199,-intron-7-of-7)	ENSMUSG00000031594	Fgl1	fibrinogen-like-protein-1			Hyper
Chr13	41958704	41959821	0.418452	0.0392074	0.552144	Promoter-(1-2kb)	ENSMUSG00000113856	Gm10790	predicted-gene-10790			Hyper
Chr6	121276978	121278022	-0.355838	0.0392351	0.552144	Intron-(uc009doi.1/14412,-intron-7-of-8)	ENSMUSG00000030109	Slc6a12	solute-carrier-family-6-(neurotransmitter-transporter,-betaine/GABA),-member-12		yes	Hypo
Chr1	38049797	38051387	0.372093	0.0392965	0.552144	Promoter-(2-3kb)	ENSMUSG00000058407	Txndc9	thioredoxin-domain-containing-9		yes	Hyper
Chr4	150476034	150477043	-0.488833	0.0393239	0.552144	Intron-(uc008vyl.2/100072,-intron-1-of-11)	ENSMUSG00000014592	Camta1	calmodulin-binding-transcription-activator-1			Hypo
Chr2	157919124	157920629	-0.325006	0.039333	0.552144	Distal-Intergenic	NA	NA	NA			Hypo
Chr5	24601665	24602671	0.49816	0.0393524	0.552144	Intron-(uc008wsm.2/108099,-intron-1-of-15)	ENSMUSG00000028944	Prkag2	protein-kinase,-AMP-activated,-gamma-2-non-catalytic-subunit		yes	Hyper
Chr12	25177554	25178681	-0.54762	0.0394135	0.552144	Distal-Intergenic	NA	NA	NA			Hypo
Chr1	183671464	183672618	-0.374052	0.0394391	0.552144	Exon-(uc007dxk.1/uc007dxk.1,-exon-2-of-9)	ENSMUSG00000004880	Lbr	lamin-B-receptor		yes	Hypo
Chr5	77862869	77863883	-0.398359	0.0394474	0.552144	Distal-Intergenic	NA	NA	NA			Hypo
Chr14	120817754	120818906	-0.316975	0.039463	0.552144	Intron-(uc007uzr.1/105559,-intron-8-of-8)	ENSMUSG00000051615	Rap2a	RAS-related-protein-2a		yes	Hypo
Chr18	46912903	46913990	0.366494	0.0394763	0.552144	Intron-(uc008evv.1/11777,-intron-1-of-5)	ENSMUSG00000024480	Ap3s1	adaptor-related-protein-complex-3,-sigma-1-subunit			Hyper
Chr1	52750724	52751804	-0.397507	0.0394872	0.552144	Intron-(uc007ayl.2/98682,-intron-2-of-6)	ENSMUSG00000041439	Mfsd6	major-facilitator-superfamily-domain-containing-6			Hypo
Chr8	37313533	37314694	0.340818	0.0394879	0.552144	Promoter-(<=1kb)	ENSMUSG00000039633	Lonrf1	LON-peptidase-N-terminal-domain-and-ring-finger-1			Hyper
Chr14	77308997	77310096	0.432476	0.0395109	0.552144	Distal-Intergenic	NA	NA	NA			Hyper
Chr1	134179376	134180470	0.324435	0.0395259	0.552144	Distal-Intergenic	NA	NA	NA			Hyper
Chr13	78376545	78378052	0.292776	0.0395686	0.552144	Intron-(uc007rhg.1/uc007rhg.1,-intron-1-of-1)	ENSMUSG00000069171	Nr2f1	nuclear-receptor-subfamily-2,-group-F,-member-1			Hyper
Chr4	11225008	11226012	0.459899	0.039603	0.552144	Intron-(uc008rzi.1/381510,-intron-6-of-18)	ENSMUSG00000045205	Dpy19l4	dpy-19-like-4-(C.-elegans)			Hyper
Chr8	72142795	72144378	-0.355869	0.0396121	0.552144	5'-UTR	ENSMUSG00000060427	Zfp868	zinc-finger-protein-868			Hypo
Chr5	104057215	104058679	0.370779	0.0396137	0.552144	Promoter-(<=1kb)	ENSMUSG00000029321	Slc10a6	solute-carrier-family-10-(sodium/bile-acid-cotransporter-family),-member-6			Hyper
Chr5	145156192	145157214	-0.534389	0.0396616	0.552144	Intron-(uc009alp.2/55950,-intron-3-of-3)	ENSMUSG00000038859	Baiap2l1	BAI1-associated-protein-2-like-1			Hypo
Chr9	22757258	22758297	0.347387	0.0396822	0.552144	Distal-Intergenic	NA	NA	NA			Hyper
Chr5	120053979	120055127	0.424946	0.0397044	0.552144	Intron-(uc008zgs.1/uc008zgs.1,-intron-1-of-5)	ENSMUSG00000018604	Tbx3	T-box-3			Hyper
Chr9	83097722	83098734	0.735251	0.0397154	0.552144	Distal-Intergenic	NA	NA	NA			Hyper
Chr7	128963288	128964610	-0.482448	0.0397861	0.552679	Distal-Intergenic	NA	NA	NA			Hypo
Chr2	146044565	146045799	-0.37531	0.0399052	0.552869	Promoter-(1-2kb)	ENSMUSG00000068154	Insm1	insulinoma-associated-1			Hypo
Chr17	24129299	24130522	0.363941	0.0399412	0.552869	3'-UTR	ENSMUSG00000045027	Prss22	protease,-serine-22			Hyper
Chr11	5870986	5872952	0.231603	0.0400131	0.552869	3'-UTR	ENSMUSG00000057897	Camk2b	calcium/calmodulin-dependent-protein-kinase-II,-beta		yes	Hyper
Chr14	62408816	62409847	-0.392479	0.0400491	0.552869	Distal-Intergenic	NA	NA	NA			Hypo
Chr1	164662689	164663733	-0.326831	0.0400646	0.552869	Intron-(uc007dgr.1/226562,-intron-1-of-34)	ENSMUSG00000040225	Prrc2c	proline-rich-coiled-coil-2C			Hypo
Chr10	93846107	93847194	-0.312453	0.0400691	0.552869	Intron-(uc007gvs.1/uc007gvs.1,-intron-1-of-1)	ENSMUSG00000053420	Gm4792	predicted-gene-4792			Hypo
Chr10	31294384	31295616	0.372141	0.0400782	0.552869	Intron-(uc007etu.2/268291,-intron-1-of-5)	ENSMUSG00000063760	Rnf217	ring-finger-protein-217			Hyper
Chr1	188826893	188828498	0.360125	0.040099	0.552869	Distal-Intergenic	NA	NA	NA			Hyper
Chr12	100636089	100637130	0.42037	0.0401469	0.552869	Intron-(uc007ort.1/71375,-intron-1-of-5)	ENSMUSG00000033713	Foxn3	forkhead-box-N3		yes	Hyper
Chr12	33910800	33912317	0.328792	0.0401706	0.552869	Intron-(uc007nin.2/380753,-intron-3-of-3)	ENSMUSG00000020564	Atxn7l1	ataxin-7-like-1			Hyper
Chr1	133291262	133292340	-0.535543	0.0401826	0.552869	Intron-(uc007cng.2/14270,-intron-4-of-22)	ENSMUSG00000026425	Srgap2	SLIT-ROBO-Rho-GTPase-activating-protein-2		yes	Hypo
Chr18	12562646	12564616	-0.321913	0.0401875	0.552869	Exon-(uc008ecf.2/16774,-exon-5-of-75)	ENSMUSG00000024421	Lama3	laminin,-alpha-3		yes	Hypo
Chr2	131984782	131985801	0.435067	0.0403353	0.554456	Distal-Intergenic	NA	NA	NA			Hyper
Chr10	9120325	9121355	-0.365149	0.0403861	0.554709	Distal-Intergenic	NA	NA	NA			Hypo
Chr17	29398250	29399546	0.319026	0.0404298	0.554864	Promoter-(1-2kb)	ENSMUSG00000024007	Ppil1	peptidylprolyl-isomerase-(cyclophilin)-like-1			Hyper
Chr5	137474093	137475247	-0.326054	0.0404979	0.555354	Distal-Intergenic	NA	NA	NA			Hypo
Chr8	86550225	86551287	-0.395758	0.0405887	0.556153	5'-UTR	ENSMUSG00000047986	Palm3	paralemmin-3			Hypo
Chr7	56132838	56133870	-0.327631	0.0407739	0.558155	Promoter-(2-3kb)	ENSMUSG00000046179	E2f8	E2F-transcription-factor-8			Hypo
Chr9	41421829	41422862	0.403201	0.0408	0.558155	Exon-(uc009paj.1/387236,-exon-4-of-4)	ENSMUSG00000093354	Mir125b-1	microRNA-125b-1			Hyper
Chr3	55239897	55240966	0.377644	0.0408353	0.558191	Intron-(uc008pgk.2/13175,-intron-4-of-6)	ENSMUSG00000027797	Dclk1	doublecortin-like-kinase-1		yes	Hyper
Chr12	85099267	85100531	-0.326336	0.0408819	0.558383	Distal-Intergenic	NA	NA	NA			Hypo
Chr10	80640969	80643382	-0.203257	0.0409598	0.559	Promoter-(<=1kb)	ENSMUSG00000064441	Snord37	small-nucleolar-RNA,-C/D-box-37			Hypo
Chr12	16816715	16817862	0.424164	0.0410447	0.559457	Promoter-(<=1kb)	ENSMUSG00000057469	E2f6	E2F-transcription-factor-6			Hyper
Chr17	34808911	34810079	-0.349324	0.0410587	0.559457	Promoter-(1-2kb)	ENSMUSG00000033327	Tnxb	tenascin-XB		yes	Hypo
Chr11	100874206	100875518	0.283428	0.0411939	0.560477	Promoter-(1-2kb)	ENSMUSG00000019302	Atp6v0a1	ATPase,-H+-transporting,-lysosomal-V0-subunit-A1		yes	Hyper
Chr5	125840932	125842404	-0.362366	0.041199	0.560477	Distal-Intergenic	NA	NA	NA			Hypo
Chr1	164024036	164025516	-0.367573	0.041264	0.560519	Intron-(uc007dfz.1/103967,-intron-4-of-8)	ENSMUSG00000040265	Dnm3	dynamin-3	yes	yes	Hypo
Chr7	29152328	29153834	-0.294403	0.0413308	0.560519	Promoter-(2-3kb)	ENSMUSG00000037552	Plekhg2	pleckstrin-homology-domain-containing,-family-G-(with-RhoGef-domain)-member-2			Hypo
Chr12	119997255	119998256	0.432506	0.0413404	0.560519	Distal-Intergenic	NA	NA	NA			Hyper
Chr7	36687902	36689070	0.343465	0.0413657	0.560519	Distal-Intergenic	NA	NA	NA			Hyper
Chr8	46440098	46441286	-0.373606	0.0414387	0.560519	Promoter-(2-3kb)	ENSMUSG00000070044	Fam149a	family-with-sequence-similarity-149,-member-A			Hypo
Chr1	136451454	136452554	0.393363	0.041459	0.560519	Distal-Intergenic	NA	NA	NA			Hyper
Chr8	19876486	19877505	0.457236	0.0414813	0.560519	Promoter-(1-2kb)	ENSMUSG00000071796	6820431F20Rik	cadherin-11-pseudogene			Hyper
Chr6	28068026	28069226	-0.438827	0.0414913	0.560519	Intron-(uc009bcj.1/14823,-intron-1-of-9)	ENSMUSG00000024211	Grm8	glutamate-receptor,-metabotropic-8		yes	Hypo
Chr9	41741086	41742782	-0.296333	0.0414969	0.560519	Distal-Intergenic	NA	NA	NA			Hypo
Chr11	97910132	97911711	-0.332744	0.0415582	0.560905	Intron-(uc007lfl.1/217154,-intron-1-of-10)	ENSMUSG00000017400	Stac2	SH3-and-cysteine-rich-domain-2			Hypo
Chr10	80849666	80851053	0.304232	0.0415934	0.560938	Promoter-(2-3kb)	ENSMUSG00000078440	Dohh	deoxyhypusine-hydroxylase/monooxygenase			Hyper
Chr15	78208207	78209434	-0.36567	0.0416493	0.561241	3'-UTR	ENSMUSG00000062154	Tex33	testis-expressed-33			Hypo
Chr2	25139978	25141345	0.378888	0.0416912	0.561241	Promoter-(2-3kb)	ENSMUSG00000026963	Tmem210	transmembrane-protein-210			Hyper
Chr7	71496676	71497714	0.361188	0.0417464	0.561241	Intron-(uc012fmp.1/330554,-intron-10-of-13)	ENSMUSG00000033458	Fan1	FANCD2/FANCI-associated-nuclease-1		yes	Hyper
Chr5	107593219	107596118	0.258118	0.0417758	0.561241	Intron-(uc008ylz.2/21814,-intron-4-of-16)	ENSMUSG00000029287	Tgfbr3	transforming-growth-factor,-beta-receptor-III			Hyper
Chr8	131075405	131076699	-0.345869	0.0417879	0.561241	Distal-Intergenic	NA	NA	NA			Hypo
Chr13	100242004	100243210	-0.31405	0.0418324	0.561241	Intron-(uc007rpr.2/17755,-intron-2-of-6)	ENSMUSG00000052727	Map1b	microtubule-associated-protein-1B			Hypo
Chr8	112129649	112130729	-0.443424	0.0419196	0.561241	Promoter-(<=1kb)	ENSMUSG00000031730	Dhodh	dihydroorotate-dehydrogenase			Hypo
Chr19	24587596	24588860	-0.367201	0.0419525	0.561241	Intron-(uc008hap.1/18719,-intron-1-of-14)	ENSMUSG00000074922	Fam122a	family-with-sequence-similarity-122,-member-A			Hypo
Chr14	48628495	48629839	0.427491	0.0419955	0.561241	Distal-Intergenic	NA	NA	NA			Hyper
Chr6	97125620	97126810	0.333342	0.0420178	0.561241	Promoter-(2-3kb)	ENSMUSG00000030059	Tmf1	TATA-element-modulatory-factor-1			Hyper
Chr14	70901771	70902792	-0.341168	0.0420458	0.561241	Intron-(uc007uob.2/12153,-intron-6-of-17)	ENSMUSG00000022098	Bmp1	bone-morphogenetic-protein-1		yes	Hypo
Chr4	135607118	135608161	-0.415065	0.0420939	0.561241	Promoter-(1-2kb)	ENSMUSG00000059291	Rpl11	ribosomal-protein-L11		yes	Hypo
Chr7	134587266	134588918	0.312565	0.0421193	0.561241	3'-UTR	ENSMUSG00000048921	Zfp689	zinc-finger-protein-689			Hyper
Chr7	16730009	16731029	-0.367413	0.0421481	0.561241	Exon-(uc009fgz.1/110891,-exon-4-of-10)	ENSMUSG00000030376	Slc8a2	solute-carrier-family-8-(sodium/calcium-exchanger),-member-2		yes	Hypo
Chr12	30847513	30848971	-0.388276	0.0421548	0.561241	Distal-Intergenic	NA	NA	NA			Hypo
Chr9	97068194	97069323	-0.381823	0.0421591	0.561241	Distal-Intergenic	NA	NA	NA			Hypo
Chr14	119627888	119629140	0.405088	0.0421734	0.561241	Intron-(uc007uzn.2/50787,-intron-1-of-1)	ENSMUSG00000053465	Hs6st3	heparan-sulfate-6-O-sulfotransferase-3		yes	Hyper
Chr3	87562559	87563609	-0.383985	0.0422985	0.562469	5'-UTR	ENSMUSG00000028073	Pear1	platelet-endothelial-aggregation-receptor-1			Hypo
Chr1	41445226	41446451	0.338701	0.0423534	0.562761	Distal-Intergenic	NA	NA	NA			Hyper
Chr9	114313323	114314442	-0.320263	0.0424345	0.562989	5'-UTR	ENSMUSG00000045594	Glb1	galactosidase,-beta-1			Hypo
Chr7	133993867	133995883	-0.292451	0.0424662	0.562989	Promoter-(2-3kb)	ENSMUSG00000052301	Doc2a	double-C2,-alpha		yes	Hypo
Chr6	125680783	125681816	0.356015	0.0424698	0.562989	Intron-(uc009duv.1/243634,-intron-3-of-15)	ENSMUSG00000038115	Ano2	anoctamin-2			Hyper
Chr16	77011530	77013208	0.348545	0.0425369	0.562989	Promoter-(1-2kb)	ENSMUSG00000022867	Usp25	ubiquitin-specific-peptidase-25		yes	Hyper
Chr8	122695568	122696844	0.358217	0.0425653	0.562989	5'-UTR	ENSMUSG00000042269	Fam92b	family-with-sequence-similarity-92,-member-B			Hyper
Chr10	78250652	78251662	-0.431451	0.0425682	0.562989	Exon-(uc007fyg.2/20513,-exon-2-of-10)	ENSMUSG00000005357	Slc1a6	solute-carrier-family-1-(high-affinity-aspartate/glutamate-transporter),-member-6		yes	Hypo
Chr13	94783561	94784833	-0.381195	0.0426008	0.562989	Distal-Intergenic	NA	NA	NA			Hypo
Chr2	50417172	50418986	-0.397705	0.0426719	0.563493	Distal-Intergenic	NA	NA	NA			Hypo
Chr6	92206950	92208144	-0.409041	0.0428208	0.565023	Distal-Intergenic	NA	NA	NA			Hypo
Chr18	69114078	69115364	0.371198	0.0429058	0.56531	Distal-Intergenic	NA	NA	NA			Hyper
Chr13	108093274	108094406	0.347229	0.0429708	0.56531	Distal-Intergenic	NA	NA	NA			Hyper
Chr8	109570592	109571665	0.392686	0.0429892	0.56531	Promoter-(<=1kb)	ENSMUSG00000078931	Pdf	peptide-deformylase-(mitochondrial)			Hyper
Chr5	36649119	36650811	-0.30502	0.0430454	0.56531	Intron-(uc008xek.1/81840,-intron-1-of-26)	ENSMUSG00000029093	Sorcs2	sortilin-related-VPS10-domain-containing-receptor-2		yes	Hypo
Chr13	40700548	40701690	-0.35647	0.0430682	0.56531	Distal-Intergenic	NA	NA	NA			Hypo
Chr16	28842066	28843075	0.289009	0.0430908	0.56531	Intron-(uc007yvv.1/239796,-intron-1-of-1)	ENSMUSG00000051065	Mb21d2	Mab-21-domain-containing-2			Hyper
Chr4	62156764	62157977	-0.332479	0.0431416	0.56531	3'-UTR	ENSMUSG00000038422	Hdhd3	haloacid-dehalogenase-like-hydrolase-domain-containing-3			Hypo
Chr13	75889375	75890445	0.38234	0.0431624	0.56531	Intron-(uc007rfu.1/192657,-intron-4-of-11)	ENSMUSG00000001542	Ell2	elongation-factor-RNA-polymerase-II-2			Hyper
Chr8	130602924	130604003	-0.423056	0.0431641	0.56531	Distal-Intergenic	NA	NA	NA			Hypo
Chr5	31256368	31257451	-0.379029	0.0431728	0.56531	3'-UTR	ENSMUSG00000006638	Abhd1	abhydrolase-domain-containing-1			Hypo
Chr16	13140894	13141920	0.391422	0.0432361	0.565354	Intron-(uc007yfx.2/50505,-intron-9-of-10)	ENSMUSG00000022545	Ercc4	excision-repair-cross-complementing-rodent-repair-deficiency,-complementation-group-4		yes	Hyper
Chr13	55310193	55311821	0.271019	0.0432423	0.565354	Promoter-(<=1kb)	ENSMUSG00000021488	Nsd1	nuclear-receptor-binding-SET-domain-protein-1	yes		Hyper
Chr2	165147088	165149021	0.284427	0.0433307	0.565695	Promoter-(2-3kb)	ENSMUSG00000017670	Elmo2	engulfment-and-cell-motility-2			Hyper
Chr4	82415662	82416805	0.366895	0.0433345	0.565695	Distal-Intergenic	NA	NA	NA			Hyper
Chr12	21319608	21320634	0.361256	0.0434074	0.566215	Promoter-(1-2kb)	ENSMUSG00000054309	Cpsf3	cleavage-and-polyadenylation-specificity-factor-3			Hyper
Chr9	123065430	123066583	0.389155	0.0434767	0.566687	3'-UTR	ENSMUSG00000025784	Clec3b	C-type-lectin-domain-family-3,-member-b		yes	Hyper
Chr1	153949453	153950796	-0.415266	0.0436376	0.568352	Distal-Intergenic	NA	NA	NA			Hypo
Chr2	153001392	153002428	0.461818	0.0437411	0.568373	Intron-(uc008nhd.1/99237,-intron-1-of-16)	ENSMUSG00000068040	Tm9sf4	transmembrane-9-superfamily-protein-member-4			Hyper
Chr5	122390212	122391318	0.378403	0.0437455	0.568373	Intron-(uc008zkm.1/13048,-intron-2-of-22)	ENSMUSG00000042589	Cux2	cut-like-homeobox-2		yes	Hyper
Chr4	132061182	132062584	0.348615	0.043765	0.568373	Exon-(uc008vbk.1/230784,-exon-1-of-1)	ENSMUSG00000028893	Sesn2	sestrin-2		yes	Hyper
Chr7	148449224	148450317	-0.308697	0.0437721	0.568373	Promoter-(1-2kb)	ENSMUSG00000025498	Irf7	interferon-regulatory-factor-7		yes	Hypo
Chr2	172405404	172406415	-0.399179	0.0438901	0.569218	Distal-Intergenic	NA	NA	NA			Hypo
Chr7	52221016	52222707	-0.289908	0.0439037	0.569218	Promoter-(<=1kb)	ENSMUSG00000007783	Cpt1c	carnitine-palmitoyltransferase-1c			Hypo
Chr8	25835327	25836398	0.351985	0.0439779	0.569748	Promoter-(<=1kb)	ENSMUSG00000031553	Adam3	a-disintegrin-and-metallopeptidase-domain-3-(cyritestin)			Hyper
Chr4	114050384	114051758	-0.340745	0.0440679	0.570483	Distal-Intergenic	NA	NA	NA			Hypo
Chr12	81357836	81359018	-0.330207	0.0442544	0.572464	Promoter-(2-3kb)	ENSMUSG00000015143	Actn1	actinin,-alpha-1		yes	Hypo
Chr4	107262239	107263264	0.31466	0.0443381	0.573114	Intron-(uc008tzv.1/230587,-intron-4-of-10)	ENSMUSG00000034762	Glis1	GLIS-family-zinc-finger-1			Hyper
Chr11	75496985	75498747	0.347878	0.0444236	0.573633	Intron-(uc007keq.1/12928,-intron-1-of-1)	ENSMUSG00000017776	Crk	v-crk-avian-sarcoma-virus-CT10-oncogene-homolog		yes	Hyper
Chr11	75339198	75340220	0.378261	0.0444453	0.573633	3'-UTR	ENSMUSG00000038178	Slc43a2	solute-carrier-family-43,-member-2			Hyper
Chr11	77253365	77255173	0.314109	0.0445506	0.574558	Intron-(uc007kgl.1/237860,-intron-12-of-14)	ENSMUSG00000020836	Coro6	coronin-6			Hyper
Chr14	63596172	63597236	-0.455493	0.044629	0.575048	3'-UTR	ENSMUSG00000075574	Defb48	defensin-beta-48			Hypo
Chr1	173958529	173959553	0.378058	0.0446598	0.575048	Promoter-(<=1kb)	ENSMUSG00000026556	Vangl2	VANGL-planar-cell-polarity-2			Hyper
Chr7	108024612	108025691	0.381417	0.0446995	0.575048	Exon-(uc009inu.1/207212,-exon-19-of-21)	ENSMUSG00000093296	Mir3102	microRNA-3102			Hyper
Chr6	70999502	71001273	0.310521	0.0447438	0.575048	Distal-Intergenic	NA	NA	NA			Hyper
Chr1	153188178	153189381	0.411173	0.0447566	0.575048	Promoter-(2-3kb)	ENSMUSG00000023150	Ivns1abp	influenza-virus-NS1A-binding-protein			Hyper
Chr6	83582296	83583327	0.414171	0.0449866	0.57757	Distal-Intergenic	NA	NA	NA			Hyper
Chr15	79705496	79706640	0.428229	0.0450322	0.577721	Distal-Intergenic	NA	NA	NA			Hyper
Chr8	122393060	122394900	-0.29728	0.0450681	0.577749	Exon-(uc009nql.1/234796,-exon-3-of-3)	ENSMUSG00000031828	Klhl36	kelch-like-36			Hypo
Chr16	4976961	4978165	-0.338512	0.0451265	0.578065	Exon-(uc007ybf.1/uc007ybf.1,-exon-9-of-9)	ENSMUSG00000022515	Anks3	ankyrin-repeat-and-sterile-alpha-motif-domain-containing-3			Hypo
Chr11	60097088	60098269	-0.324228	0.0452415	0.579105	Intron-(uc007jfq.1/216810,-intron-1-of-14)	ENSMUSG00000000538	Tom1l2	target-of-myb1-like-2-(chicken)			Hypo
Chr6	72308475	72309601	-0.355029	0.0452867	0.579198	Promoter-(2-3kb)	ENSMUSG00000055850	Rnf181	ring-finger-protein-181			Hypo
Chr19	41388384	41389805	-0.393685	0.0453165	0.579198	Intron-(uc008hlu.1/83490,-intron-8-of-16)	ENSMUSG00000025017	Pik3ap1	phosphoinositide-3-kinase-adaptor-protein-1			Hypo
Chr5	97429522	97430690	-0.339229	0.045404	0.579884	Promoter-(2-3kb)	ENSMUSG00000034663	Bmp2k	BMP2-inducible-kinase			Hypo
Chr2	156865417	156866938	-0.252838	0.0456365	0.580298	Exon-(uc008nol.2/320706,-exon-5-of-15)	ENSMUSG00000027635	Dsn1	DSN1-homolog,-MIS12-kinetochore-complex-component			Hypo
Chr3	60336116	60337261	-0.340585	0.0456964	0.580298	Intron-(uc008pjb.1/56758,-intron-1-of-8)	ENSMUSG00000027763	Mbnl1	muscleblind-like-splicing-factor-1		yes	Hypo
Chr5	81471312	81472780	0.333225	0.0457109	0.580298	Intron-(uc008xwi.1/319387,-intron-1-of-5)	ENSMUSG00000037605	Adgrl3	adhesion-G-protein-coupled-receptor-L3			Hyper
Chr7	75309446	75310545	0.255024	0.0457233	0.580298	Exon-(uc009hja.1/16001,-exon-3-of-21)	ENSMUSG00000005533	Igf1r	insulin-like-growth-factor-I-receptor		yes	Hyper
Chr9	58989514	58990908	-0.368526	0.0457253	0.580298	Distal-Intergenic	NA	NA	NA			Hypo
Chr16	11519044	11520458	-0.300883	0.0457466	0.580298	Intron-(uc007yfi.2/74478,-intron-7-of-10)	ENSMUSG00000071669	Snx29	sorting-nexin-29		yes	Hypo
Chr16	91328823	91329877	0.37685	0.0457588	0.580298	Distal-Intergenic	NA	NA	NA			Hyper
Chr3	90393117	90394149	-0.447908	0.0458071	0.580298	Promoter-(<=1kb)	ENSMUSG00000094018	S100a2	S100-calcium-binding-protein-A2		yes	Hypo
Chr8	129278064	129279179	-0.314827	0.0458545	0.580298	Distal-Intergenic	NA	NA	NA			Hypo
Chr1	154076093	154077120	-0.363493	0.0459376	0.580298	Distal-Intergenic	NA	NA	NA			Hypo
Chr7	91475076	91476108	0.40533	0.0459437	0.580298	Intron-(uc009ief.1/11864,-intron-7-of-20)	ENSMUSG00000015709	Arnt2	aryl-hydrocarbon-receptor-nuclear-translocator-2		yes	Hyper
Chr11	98660073	98661095	0.438644	0.0459907	0.580298	Promoter-(<=1kb)	ENSMUSG00000052915	Msl1	male-specific-lethal-1			Hyper
Chr12	29499378	29500411	0.501096	0.0459933	0.580298	Intron-(uc007ngb.2/380752,-intron-3-of-8)	ENSMUSG00000036613	Eipr1	EARP-complex-and-GARP-complex-interacting-protein-1			Hyper
Chr2	32307723	32308941	0.349353	0.0459979	0.580298	Promoter-(<=1kb)	ENSMUSG00000026819	Slc25a25	solute-carrier-family-25-(mitochondrial-carrier,-phosphate-carrier),-member-25			Hyper
Chr18	81593796	81595684	-0.309572	0.0460344	0.580298	Distal-Intergenic	NA	NA	NA			Hypo
Chr11	69470809	69472141	-0.286028	0.0460479	0.580298	Promoter-(1-2kb)	ENSMUSG00000041287	Sox15	SRY-(sex-determining-region-Y)-box-15			Hypo
Chr13	47369618	47370715	0.340352	0.0460569	0.580298	Distal-Intergenic	NA	NA	NA			Hyper
Chr16	64857507	64858726	-0.347474	0.0460852	0.580298	3'-UTR	ENSMUSG00000054604	Cggbp1	CGG-triplet-repeat-binding-protein-1			Hypo
Chr4	45198585	45199653	0.318867	0.0460858	0.580298	Promoter-(<=1kb)	ENSMUSG00000035615	Frmpd1	FERM-and-PDZ-domain-containing-1			Hyper
Chr10	43083810	43085178	0.279823	0.0461146	0.580298	Intron-(uc007ezi.2/71365,-intron-3-of-7)	ENSMUSG00000038214	Bend3	BEN-domain-containing-3			Hyper
Chr5	67187563	67188575	0.340128	0.0461602	0.580445	Intron-(uc008xph.1/77569,-intron-1-of-25)	ENSMUSG00000037736	Limch1	LIM-and-calponin-homology-domains-1			Hyper
Chr12	118580221	118581319	-0.352524	0.046226	0.580846	Distal-Intergenic	NA	NA	NA			Hypo
Chr8	35549149	35550387	-0.281536	0.0463838	0.582113	Distal-Intergenic	NA	NA	NA			Hypo
Chr1	135205919	135207793	-0.302293	0.0463949	0.582113	Promoter-(<=1kb)	ENSMUSG00000102367	Kiss1	KiSS-1-metastasis-suppressor			Hypo
Chr5	45821675	45822927	-0.531668	0.046461	0.582276	Downstream-(2-3kb)	ENSMUSG00000015806	Qdpr	quinoid-dihydropteridine-reductase		yes	Hypo
Chr1	82252034	82253264	0.337592	0.046476	0.582276	Intron-(uc007brp.2/16367,-intron-1-of-1)	ENSMUSG00000055980	Irs1	insulin-receptor-substrate-1		yes	Hyper
Chr11	4018630	4020074	-0.313906	0.0465925	0.582925	Promoter-(<=1kb)	ENSMUSG00000003585	Sec14l2	SEC14-like-lipid-binding-2		yes	Hypo
Chr2	59002309	59003579	0.355199	0.0465959	0.582925	Intron-(uc008jsz.1/227937,-intron-1-of-14)	ENSMUSG00000026991	Pkp4	plakophilin-4		yes	Hyper
Chr12	80927744	80929229	0.293796	0.046645	0.583114	Distal-Intergenic	NA	NA	NA			Hyper
Chr15	65621643	65622650	-0.328475	0.0467235	0.583669	Exon-(uc007vzq.1/76740,-exon-3-of-3)	ENSMUSG00000015002	Efr3a	EFR3-homolog-A			Hypo
Chr6	33942760	33943871	-0.338526	0.0467603	0.583702	Distal-Intergenic	NA	NA	NA			Hypo
Chr2	27017539	27018870	-0.344755	0.0467997	0.583768	Promoter-(2-3kb)	ENSMUSG00000000889	Dbh	dopamine-beta-hydroxylase		yes	Hypo
Chr11	20457903	20459032	0.393045	0.047066	0.586546	Intron-(uc007idc.1/58172,-intron-1-of-1)	ENSMUSG00000049800	Sertad2	SERTA-domain-containing-2			Hyper
Chr3	51199283	51200314	0.492325	0.0471711	0.586546	Promoter-(<=1kb)	ENSMUSG00000037161	Mgarp	mitochondria-localized-glutamic-acid-rich-protein			Hyper
Chr13	59940133	59941263	0.391672	0.0471942	0.586546	Distal-Intergenic	NA	NA	NA			Hyper
Chr1	75437771	75438796	-0.335837	0.0471952	0.586546	Exon-(uc007bpd.1/69080,-exon-8-of-13)	ENSMUSG00000033021	Gmppa	GDP-mannose-pyrophosphorylase-A			Hypo
Chr15	84615954	84616962	0.340465	0.0472574	0.586546	3'-UTR	ENSMUSG00000016624	Phf21b	PHD-finger-protein-21B			Hyper
Chr5	135395402	135396440	0.413581	0.0472796	0.586546	Distal-Intergenic	NA	NA	NA			Hyper
Chr7	20188100	20189127	0.408015	0.0473942	0.586546	Promoter-(<=1kb)	ENSMUSG00000061028	Clasrp	CLK4-associating-serine/arginine-rich-protein			Hyper
Chr3	109824032	109825300	-0.34009	0.0474127	0.586546	Intron-(uc008rai.2/80883,-intron-1-of-5)	ENSMUSG00000059857	Ntng1	netrin-G1		yes	Hypo
Chr9	67600769	67602028	0.372946	0.0474189	0.586546	Distal-Intergenic	NA	NA	NA			Hyper
Chr3	8829537	8830772	-0.311098	0.0474199	0.586546	Intron-(uc008ooq.2/66230,-intron-2-of-2)	ENSMUSG00000040269	Mrps28	mitochondrial-ribosomal-protein-S28			Hypo
Chr2	38489659	38490716	0.442933	0.047421	0.586546	Intron-(uc008jnp.1/19177,-intron-4-of-7)	ENSMUSG00000026750	Psmb7	proteasome-(prosome,-macropain)-subunit,-beta-type-7		yes	Hyper
Chr4	33139102	33140187	0.370655	0.0475022	0.586546	3'-UTR	ENSMUSG00000023267	Gabrr2	gamma-aminobutyric-acid-(GABA)-C-receptor,-subunit-rho-2		yes	Hyper
Chr5	37855448	37856622	-0.371676	0.0475208	0.586546	Intron-(uc008xft.2/64293,-intron-7-of-11)	ENSMUSG00000050248	Evc2	EvC-ciliary-complex-subunit-2			Hypo
Chr1	168677310	168678795	-0.443684	0.047549	0.586546	Distal-Intergenic	NA	NA	NA			Hypo
Chr5	151041938	151043079	0.359931	0.0475939	0.586546	Intron-(uc009ats.1/320365,-intron-1-of-6)	ENSMUSG00000056602	Fry	FRY-microtubule-binding-protein		yes	Hyper
Chr14	65582111	65583199	0.453182	0.0475959	0.586546	Intron-(uc007uiu.1/210925,-intron-1-of-7)	ENSMUSG00000021975	Ints9	integrator-complex-subunit-9			Hyper
Chr10	122277948	122279071	0.372478	0.0476051	0.586546	Intron-(uc007hgf.2/319468,-intron-4-of-5)	ENSMUSG00000065406	Mirlet7i	microRNA-let7i			Hyper
Chr6	135544235	135545541	-0.435225	0.047669	0.586911	Distal-Intergenic	NA	NA	NA			Hypo
Chr9	49366018	49367155	0.3299	0.0477494	0.587479	Promoter-(<=1kb)	ENSMUSG00000039542	Ncam1	neural-cell-adhesion-molecule-1		yes	Hyper
Chr6	117000175	117001656	-0.302542	0.0479468	0.589414	Distal-Intergenic	NA	NA	NA			Hypo
Chr7	149625150	149626580	0.280951	0.0479756	0.589414	Promoter-(1-2kb)	ENSMUSG00000031097	Tnni2	troponin-I,-skeletal,-fast-2			Hyper
Chr5	67192705	67193923	-0.285927	0.0481052	0.589723	Intron-(uc008xph.1/77569,-intron-1-of-25)	ENSMUSG00000037736	Limch1	LIM-and-calponin-homology-domains-1			Hypo
Chr4	58386238	58387346	0.384297	0.0481341	0.589723	3'-UTR	ENSMUSG00000093293	Mir3095	microRNA-3095			Hyper
Chr18	13067983	13069168	0.432703	0.0481878	0.589723	Exon-(uc008ecu.1/64291,-exon-7-of-28)	ENSMUSG00000044252	Osbpl1a	oxysterol-binding-protein-like-1A			Hyper
Chr18	25038979	25040604	0.371823	0.0482411	0.589723	Intron-(uc008ehb.1/225288,-intron-3-of-26)	ENSMUSG00000034295	Fhod3	formin-homology-2-domain-containing-3		yes	Hyper
Chr2	127545079	127546270	0.363591	0.0482612	0.589723	Intron-(uc008mfx.1/228576,-intron-1-of-3)	ENSMUSG00000027377	Mall	mal,-T-cell-differentiation-protein-like			Hyper
Chr10	94901334	94902668	-0.373374	0.0482634	0.589723	Distal-Intergenic	NA	NA	NA			Hypo
Chr6	85916219	85917420	0.36462	0.0482848	0.589723	Distal-Intergenic	NA	NA	NA			Hyper
Chr8	37517593	37518880	-0.374454	0.0483046	0.589723	Promoter-(1-2kb)	ENSMUSG00000039620	6430573F11Rik	RIKEN-cDNA-6430573F11-gene			Hypo
Chr8	89171957	89173127	0.393707	0.0483517	0.589723	Promoter-(2-3kb)	ENSMUSG00000047866	Lonp2	lon-peptidase-2,-peroxisomal			Hyper
Chr2	177879967	177881840	0.251387	0.0484595	0.589723	Intron-(uc008ohj.2/74189,-intron-1-of-12)	ENSMUSG00000027525	Phactr3	phosphatase-and-actin-regulator-3			Hyper
Chr16	55753782	55755332	-0.380907	0.0484722	0.589723	Distal-Intergenic	NA	NA	NA			Hypo
Chr14	70089525	70090724	-0.275609	0.0484748	0.589723	Exon-(uc007umn.2/94352,-exon-12-of-14)	ENSMUSG00000034194	R3hcc1	R3H-domain-and-coiled-coil-containing-1			Hypo
Chr10	59322078	59323376	0.281026	0.0484759	0.589723	Intron-(uc007fdx.1/216001,-intron-10-of-11)	ENSMUSG00000020109	Dnajb12	DnaJ-heat-shock-protein-family-(Hsp40)-member-B12		yes	Hyper
Chr3	105580229	105581577	-0.323281	0.0484832	0.589723	Intron-(uc008qve.1/109905,-intron-1-of-7)	ENSMUSG00000068798	Rap1a	RAS-related-protein-1a		yes	Hypo
Chr9	72166003	72167108	0.381213	0.0485319	0.589896	5'-UTR	ENSMUSG00000038535	Zfp280d	zinc-finger-protein-280D			Hyper
Chr2	90978523	90979631	-0.373867	0.0485843	0.590045	3'-UTR	ENSMUSG00000040687	Madd	MAP-kinase-activating-death-domain			Hypo
Chr7	26470661	26471756	-0.3043	0.048613	0.590045	Promoter-(<=1kb)	ENSMUSG00000002603	Tgfb1	transforming-growth-factor,-beta-1		yes	Hypo
Chr6	65766947	65768219	-0.419743	0.0487012	0.590573	Intron-(uc009cej.1/70779,-intron-2-of-2)	ENSMUSG00000029913	Prdm5	PR-domain-containing-5		yes	Hypo
Chr19	42844407	42845509	-0.338144	0.0487256	0.590573	Exon-(uc008hny.1/192236,-exon-5-of-20)	ENSMUSG00000025188	Hps1	HPS1,-biogenesis-of-lysosomal-organelles-complex-3-subunit-1			Hypo
Chr8	120782136	120783147	0.440853	0.0487839	0.590762	Distal-Intergenic	NA	NA	NA			Hyper
Chr16	20108463	20109535	-0.431375	0.0488215	0.590762	Intron-(uc007yph.1/75785,-intron-3-of-7)	ENSMUSG00000062901	Klhl24	kelch-like-24			Hypo
Chr9	50403082	50404346	0.325514	0.0488642	0.590762	Downstream-(<1kb)	ENSMUSG00000000171	Sdhd	succinate-dehydrogenase-complex,-subunit-D,-integral-membrane-protein		yes	Hyper
Chr15	30519955	30521199	0.390994	0.0490275	0.590762	Intron-(uc007vjz.1/18163,-intron-3-of-22)	ENSMUSG00000022240	Ctnnd2	catenin-(cadherin-associated-protein),-delta-2		yes	Hyper
Chr17	84528150	84529729	0.292995	0.0490762	0.590762	Distal-Intergenic	NA	NA	NA			Hyper
Chr7	54346430	54347441	0.413266	0.0490768	0.590762	5'-UTR	ENSMUSG00000010307	Tmem86a	transmembrane-protein-86A			Hyper
Chr11	58795565	58796815	0.362388	0.0490907	0.590762	Exon-(uc007jcy.1/94091,-exon-3-of-5)	ENSMUSG00000020455	Trim11	tripartite-motif-containing-11			Hyper
Chr1	172785108	172786257	0.430549	0.0491176	0.590762	Exon-(uc007dmj.1/226641,-exon-2-of-16)	ENSMUSG00000026663	Atf6	activating-transcription-factor-6		yes	Hyper
Chr2	71459758	71461189	0.299886	0.0491354	0.590762	Distal-Intergenic	NA	NA	NA			Hyper
Chr11	76457616	76459287	0.319996	0.049151	0.590762	Distal-Intergenic	NA	NA	NA			Hyper
Chr7	119276146	119277244	-0.336206	0.0491649	0.590762	Intron-(uc009jgi.1/50781,-intron-3-of-6)	ENSMUSG00000030772	Dkk3	dickkopf-WNT-signaling-pathway-inhibitor-3			Hypo
Chr9	122105375	122107006	-0.289618	0.0492397	0.590762	Intron-(uc009ser.1/102566,-intron-12-of-12)	ENSMUSG00000037949	Ano10	anoctamin-10			Hypo
Chr17	79194209	79196183	0.372788	0.0492918	0.590762	Exon-(uc008dpc.1/320473,-exon-22-of-36)	ENSMUSG00000039414	Heatr5b	HEAT-repeat-containing-5B			Hyper
Chr14	23173659	23174743	0.355409	0.0493085	0.590762	Intron-(uc007slz.2/76633,-intron-2-of-6)	ENSMUSG00000063458	Lrmda	leucine-rich-melanocyte-differentiation-associated			Hyper
Chr7	29251181	29252524	-0.329913	0.0493839	0.590762	3'-UTR	ENSMUSG00000030600	Lrfn1	leucine-rich-repeat-and-fibronectin-type-III-domain-containing-1			Hypo
Chr2	135624505	135625662	0.315751	0.0493987	0.590762	Intron-(uc008mob.1/18798,-intron-2-of-28)	ENSMUSG00000039943	Plcb4	phospholipase-C,-beta-4		yes	Hyper
Chr1	64035155	64036301	0.290627	0.0494162	0.590762	Distal-Intergenic	NA	NA	NA			Hyper
Chr2	174184587	174185825	0.475158	0.0494253	0.590762	Distal-Intergenic	NA	NA	NA			Hyper
Chr8	86191121	86192160	-0.335288	0.0494585	0.590762	Promoter-(<=1kb)	ENSMUSG00000019464	Ptger1	prostaglandin-E-receptor-1-(subtype-EP1)		yes	Hypo
Chr4	81940614	81941814	0.446245	0.0495091	0.590762	3'-UTR	ENSMUSG00000008575	Nfib	nuclear-factor-I/B			Hyper
Chr5	135323569	135325270	0.340294	0.0496022	0.590762	Distal-Intergenic	NA	NA	NA			Hyper
Chr3	30245522	30246801	-0.396453	0.0496077	0.590762	Intron-(uc008our.1/14013,-intron-2-of-7)	ENSMUSG00000027684	Mecom	MDS1-and-EVI1-complex-locus		yes	Hypo
Chr7	152351439	152352465	-0.475103	0.0496376	0.590762	Distal-Intergenic	NA	NA	NA			Hypo
Chr9	52611762	52612798	-0.446266	0.0496513	0.590762	Distal-Intergenic	NA	NA	NA			Hypo
Chr5	72359409	72360526	0.442095	0.0496656	0.590762	Intron-(uc008xrb.1/14400,-intron-4-of-8)	ENSMUSG00000029213	Commd8	COMM-domain-containing-8			Hyper
Chr15	95631621	95632921	0.245429	0.0497618	0.590762	Intron-(uc007xju.1/105722,-intron-1-of-19)	ENSMUSG00000064210	Ano6	anoctamin-6			Hyper
Chr14	115621398	115622481	0.464956	0.0497826	0.590762	Intron-(uc007uyi.2/103978,-intron-2-of-7)	ENSMUSG00000022112	Gpc5	glypican-5			Hyper
Chr16	94529669	94531246	0.272117	0.0498494	0.590762	Distal-Intergenic	NA	NA	NA			Hyper
Chr1	129903382	129905245	-0.331329	0.0498638	0.590762	Intron-(uc007cld.1/226409,-intron-8-of-20)	ENSMUSG00000036086	Zranb3	zinc-finger,-RAN-binding-domain-containing-3		yes	Hypo
Chr9	41733831	41734942	-0.36905	0.0499104	0.590762	Distal-Intergenic	NA	NA	NA			Hypo
Chr5	122547929	122549437	-0.368209	0.049921	0.590762	Promoter-(1-2kb)	ENSMUSG00000013936	Myl2	myosin,-light-polypeptide-2,-regulatory,-cardiac,-slow		yes	Hypo
Chr11	102126383	102127714	-0.281767	0.0499219	0.590762	Promoter-(2-3kb)	ENSMUSG00000034768	Asb16	ankyrin-repeat-and-SOCS-box-containing-16			Hypo
Chr11	113782872	113784387	-0.364128	0.0499888	0.590762	Intron-(uc007mfe.1/237979,-intron-2-of-44)	ENSMUSG00000041592	Sdk2	sidekick-cell-adhesion-molecule-2			Hypo

## Sheet: Hippocampus PSHETvsControlHET
Dataset 1: DhMRs and DhMR-associated genes
Hippocampus
PS HET vs Control HET
Chromosome	Region start	Region end	log fold change	P-value	FDR P-value	Genomic structure annotation	ENSEMBL ID	Gene Symbol	Gene Name	Developmental brain disorders-related genes	Stress-related genes	Direction of DhMR
Chr1	138312790	138314626	0.578231	3.53844e-06	0.0869749	Promoter-(<=1kb)	ENSMUSG00000097403	9230116N13Rik	RIKEN-cDNA-9230116N13-gene			Hyper
Chr12	91569823	91571223	0.807937	6.58698e-06	0.0869749	3'-UTR	ENSMUSG00000007682	Dio2	deiodinase,-iodothyronine,-type-II		yes	Hyper
Chr5	128975083	128976543	-0.691792	9.21051e-06	0.0869749	Distal-Intergenic	NA	NA	NA			Hypo
Chr9	103547335	103548358	0.700302	1.83117e-05	0.108817	Intron-(uc009rgx.2/81907,-intron-1-of-4)	ENSMUSG00000042757	Tmem108	transmembrane-protein-108			Hyper
Chr1	106890122	106892143	0.594701	2.11904e-05	0.108817	3'-UTR	ENSMUSG00000050840	Cdh20	cadherin-20			Hyper
Chr6	91008485	91009862	-0.832011	2.65945e-05	0.108817	Intron-(uc012epb.1/54563,-intron-9-of-32)	ENSMUSG00000030091	Nup210	nucleoporin-210			Hypo
Chr13	13835060	13836066	0.95617	3.08641e-05	0.108817	Exon-(uc007pmj.1/17101,-exon-44-of-53)	ENSMUSG00000019726	Lyst	lysosomal-trafficking-regulator		yes	Hyper
Chr2	33693103	33694307	-0.616603	3.36229e-05	0.108817	Intron-(uc008jib.1/72543,-intron-3-of-9)	ENSMUSG00000038740	Mvb12b	multivesicular-body-subunit-12B			Hypo
Chr1	153949788	153950818	0.764995	4.22717e-05	0.108817	Distal-Intergenic	NA	NA	NA			Hyper
Chr10	6424845	6426427	-0.602823	4.54049e-05	0.108817	Intron-(uc007ehl.2/213783,-intron-4-of-15)	ENSMUSG00000040624	Plekhg1	pleckstrin-homology-domain-containing,-family-G-(with-RhoGef-domain)-member-1			Hypo
Chr16	49936162	49938055	0.576539	4.63023e-05	0.108817	Distal-Intergenic	NA	NA	NA			Hyper
Chr6	87162798	87163852	-0.78673	4.67229e-05	0.108817	Intron-(uc009ctd.1/69538,-intron-12-of-16)	ENSMUSG00000033420	Antxr1	anthrax-toxin-receptor-1			Hypo
Chr10	96307617	96309016	0.643091	5.10855e-05	0.108817	Distal-Intergenic	NA	NA	NA			Hyper
Chr1	179024129	179025258	0.727438	5.58856e-05	0.108817	Intron-(uc007duk.2/23797,-intron-5-of-12)	ENSMUSG00000019699	Akt3	thymoma-viral-proto-oncogene-3		yes	Hyper
Chr1	93450872	93451883	0.871869	5.76178e-05	0.108817	3'-UTR	ENSMUSG00000026311	Asb1	ankyrin-repeat-and-SOCS-box-containing-1			Hyper
Chr10	17832884	17834703	0.777047	6.37964e-05	0.112955	Exon-(uc007ema.2/19707,-exon-11-of-20)	ENSMUSG00000019854	Reps1	RalBP1-associated-Eps-domain-containing-protein		yes	Hyper
Chr15	36840329	36841387	0.655047	7.46528e-05	0.114527	Distal-Intergenic	NA	NA	NA			Hyper
Chr14	93794007	93795019	0.929528	8.39038e-05	0.114527	Intron-(uc007uul.1/211712,-intron-1-of-2)	ENSMUSG00000055421	Pcdh9	protocadherin-9		yes	Hyper
Chr11	95387046	95388465	-0.606722	8.40274e-05	0.114527	Distal-Intergenic	NA	NA	NA			Hypo
Chr3	35679497	35680724	0.93015	8.54181e-05	0.114527	Intron-(uc008oys.1/76295,-intron-2-of-21)	ENSMUSG00000037400	Atp11b	ATPase,-class-VI,-type-11B			Hyper
Chr9	79791437	79792454	0.856018	8.84436e-05	0.114527	Intron-(uc009quy.1/70598,-intron-1-of-5)	ENSMUSG00000034898	Filip1	filamin-A-interacting-protein-1			Hyper
Chr5	14539116	14540648	0.726267	0.000100863	0.114527	Exon-(uc008wmh.2/26875,-exon-3-of-20)	ENSMUSG00000061601	Pclo	piccolo-(presynaptic-cytomatrix-protein)		yes	Hyper
Chr3	89135363	89136530	-0.585661	0.000102984	0.114527	Downstream-(<1kb)	ENSMUSG00000028040	Efna4	ephrin-A4			Hypo
Chr10	26436876	26438037	0.919385	0.000106322	0.114527	Distal-Intergenic	NA	NA	NA			Hyper
Chr9	59319273	59320512	0.651999	0.000113203	0.114527	Intron-(uc009pxs.2/23806,-intron-1-of-13)	ENSMUSG00000025234	Arih1	ariadne-RBR-E3-ubiquitin-protein-ligase-1		yes	Hyper
Chr9	49755624	49757474	-0.646667	0.000114964	0.114527	Distal-Intergenic	NA	NA	NA			Hypo
Chr7	28076731	28078059	-0.749333	0.000115655	0.114527	Distal-Intergenic	NA	NA	NA			Hypo
Chr3	67267990	67269082	-0.811455	0.000121338	0.114527	Promoter-(<=1kb)	ENSMUSG00000047557	Lxn	latexin			Hypo
Chr5	110660616	110662433	0.582799	0.00012886	0.114527	Promoter-(<=1kb)	ENSMUSG00000029501	Ankle2	ankyrin-repeat-and-LEM-domain-containing-2			Hyper
Chr2	130166747	130167936	-0.728988	0.000132573	0.114527	Intron-(uc008mio.2/228598,-intron-6-of-16)	ENSMUSG00000053552	Ebf4	early-B-cell-factor-4		yes	Hypo
Chr3	83865330	83866748	-0.692094	0.00013961	0.114527	Distal-Intergenic	NA	NA	NA			Hypo
Chr7	53943341	53945234	0.564017	0.000140785	0.114527	3'-UTR	ENSMUSG00000040046	Tph1	tryptophan-hydroxylase-1		yes	Hyper
Chr10	10885757	10887032	0.691011	0.000144938	0.114527	Promoter-(<=1kb)	ENSMUSG00000090112	Shprh	SNF2-histone-linker-PHD-RING-helicase		yes	Hyper
Chr1	34507423	34508720	0.689593	0.000153877	0.114527	Distal-Intergenic	NA	NA	NA			Hyper
Chr6	91164355	91165921	-0.658795	0.000153905	0.114527	Promoter-(1-2kb)	ENSMUSG00000064080	Fbln2	fibulin-2		yes	Hypo
Chr17	47733705	47734940	-0.551966	0.000157304	0.114527	3'-UTR	ENSMUSG00000034165	Ccnd3	cyclin-D3			Hypo
Chr5	72794505	72795933	0.607311	0.000157622	0.114527	Intron-(uc008xrj.2/53419,-intron-5-of-21)	ENSMUSG00000005220	Corin	corin		yes	Hyper
Chr8	126199613	126201550	-0.613066	0.000158281	0.114527	Distal-Intergenic	NA	NA	NA			Hypo
Chr13	115152932	115154827	0.583639	0.000162668	0.114527	Intron-(uc007rxm.2/17993,-intron-1-of-4)	ENSMUSG00000021764	Ndufs4	NADH:ubiquinone-oxidoreductase-core-subunit-S4		yes	Hyper
Chr3	95601981	95603018	0.647437	0.000163853	0.114527	Intron-(uc008qkx.1/75137,-intron-1-of-10)	ENSMUSG00000028106	Rprd2	regulation-of-nuclear-pre-mRNA-domain-containing-2			Hyper
Chr7	142764198	142765941	-0.508775	0.000168858	0.114527	Intron-(uc009kee.1/19267,-intron-1-of-20)	ENSMUSG00000088141	Mir1962	microRNA-1962			Hypo
Chr1	189369835	189371117	-0.82674	0.000172661	0.114527	Distal-Intergenic	NA	NA	NA			Hypo
Chr2	131002360	131004341	-0.499715	0.000173837	0.114527	Promoter-(1-2kb)	ENSMUSG00000068267	Cenpb	centromere-protein-B			Hypo
Chr2	167308342	167310264	-0.441233	0.000181551	0.11689	Promoter-(1-2kb)	ENSMUSG00000047030	Spata2	spermatogenesis-associated-2			Hypo
Chr1	138771568	138772763	-0.683124	0.000195018	0.12277	Intron-(uc007cva.2/26424,-intron-6-of-6)	ENSMUSG00000026398	Nr5a2	nuclear-receptor-subfamily-5,-group-A,-member-2		yes	Hypo
Chr10	27857773	27858913	0.736211	0.00021617	0.125832	Intron-(uc007esj.1/19272,-intron-1-of-2)	ENSMUSG00000019889	Ptprk	protein-tyrosine-phosphatase,-receptor-type,-K			Hyper
Chr17	53781444	53782655	0.713485	0.000216432	0.125832	Intron-(uc008czp.2/18519,-intron-7-of-17)	ENSMUSG00000023940	Sgo1	shugoshin-1			Hyper
Chr10	96481239	96482287	0.873227	0.000217038	0.125832	Distal-Intergenic	NA	NA	NA			Hyper
Chr13	75910719	75912678	0.697451	0.000222074	0.125832	Distal-Intergenic	NA	NA	NA			Hyper
Chr6	87053897	87055032	-0.91646	0.00022209	0.125832	Promoter-(<=1kb)	ENSMUSG00000090891	D6Ertd527e	DNA-segment,-Chr-6,-ERATO-Doi-527,-expressed			Hypo
Chr2	76285473	76286836	0.569343	0.00023048	0.128025	Intron-(uc008kfa.1/99031,-intron-1-of-26)	ENSMUSG00000042359	Osbpl6	oxysterol-binding-protein-like-6			Hyper
Chr3	130463557	130464587	-0.699561	0.000236349	0.12876	Distal-Intergenic	NA	NA	NA			Hypo
Chr7	31425688	31426956	0.71172	0.000248479	0.132815	3'-UTR	ENSMUSG00000006311	Etv2	ets-variant-2			Hyper
Chr12	78365116	78366799	0.652535	0.000258471	0.134845	Intron-(uc007nyy.1/53618,-intron-1-of-12)	ENSMUSG00000021065	Fut8	fucosyltransferase-8			Hyper
Chr15	96541962	96542968	-0.732559	0.000265173	0.134845	Distal-Intergenic	NA	NA	NA			Hypo
Chr10	79596599	79598071	-0.546461	0.000266559	0.134845	Promoter-(<=1kb)	ENSMUSG00000035640	Cbarp	calcium-channel,-voltage-dependent,-beta-subunit-associated-regulatory-protein			Hypo
Chr11	6492562	6493832	-0.652988	0.000271781	0.135075	Exon-(uc007hyv.2/216527,-exon-7-of-10)	ENSMUSG00000041073	Nacad	NAC-alpha-domain-containing			Hypo
Chr10	16956943	16958491	0.4878	0.000308487	0.141447	Distal-Intergenic	NA	NA	NA			Hyper
Chr6	17589623	17590881	0.799056	0.000316499	0.141447	Promoter-(2-3kb)	ENSMUSG00000015733	Capza2	capping-protein-(actin-filament)-muscle-Z-line,-alpha-2		yes	Hyper
Chr13	47701657	47702802	-0.753653	0.000325083	0.141447	Distal-Intergenic	NA	NA	NA			Hypo
Chr9	89997743	89999684	0.524316	0.000325645	0.141447	Exon-(uc009qzw.2/21761,-exon-4-of-13)	ENSMUSG00000062270	Morf4l1	mortality-factor-4-like-1			Hyper
Chr11	25895905	25896985	-0.736479	0.000325975	0.141447	Intron-(uc011xsi.1/70626,-intron-1-of-5)	NA	5730522E02Rik	RIKEN-cDNA-5730522E02-gene			Hypo
Chr10	80758818	80760107	-0.487191	0.000328748	0.141447	Intron-(uc007ghc.2/18717,-intron-1-of-17)	ENSMUSG00000034902	Pip5k1c	phosphatidylinositol-4-phosphate-5-kinase,-type-1-gamma			Hypo
Chr17	26344030	26345044	-0.656954	0.000328895	0.141447	Promoter-(<=1kb)	ENSMUSG00000024186	Rgs11	regulator-of-G-protein-signaling-11			Hypo
Chr6	129490805	129492466	0.49923	0.000333863	0.141447	3'-UTR	ENSMUSG00000030161	Gabarapl1	gamma-aminobutyric-acid-(GABA)-A-receptor-associated-protein-like-1			Hyper
Chr8	97633409	97634423	-0.625786	0.000339696	0.141447	Promoter-(<=1kb)	ENSMUSG00000031788	Kifc3	kinesin-family-member-C3			Hypo
Chr13	45075217	45076493	0.59792	0.000340672	0.141447	Promoter-(1-2kb)	ENSMUSG00000057531	Dtnbp1	dystrobrevin-binding-protein-1		yes	Hyper
Chr13	28594282	28595408	0.635543	0.00034476	0.141447	Intron-(uc011yxv.1/uc011yxv.1,-intron-1-of-1)	ENSMUSG00000017064	Prl5a1	prolactin-family-5,-subfamily-a,-member-1			Hyper
Chr15	102304113	102305187	0.781418	0.000349291	0.141447	Promoter-(<=1kb)	ENSMUSG00000056851	Pcbp2	poly(rC)-binding-protein-2		yes	Hyper
Chr15	50962002	50963100	0.757241	0.00034951	0.141447	Distal-Intergenic	NA	NA	NA			Hyper
Chr13	74098575	74100480	0.663947	0.000375744	0.147955	Promoter-(<=1kb)	ENSMUSG00000069189	Zdhhc11	zinc-finger,-DHHC-domain-containing-11			Hyper
Chr18	34395961	34397814	0.529935	0.000376038	0.147955	Intron-(uc008ekd.1/11789,-intron-1-of-10)	ENSMUSG00000005871	Apc	adenomatosis-polyposis-coli		yes	Hyper
Chr1	74640017	74641337	-0.537861	0.000386781	0.149393	3'-UTR	ENSMUSG00000026172	Bcs1l	BCS1-like-(yeast)			Hypo
Chr14	65642174	65643178	0.899415	0.00039024	0.149393	Intron-(uc007uiv.1/210925,-intron-10-of-13)	ENSMUSG00000021975	Ints9	integrator-complex-subunit-9			Hyper
Chr14	56231650	56232728	-0.840737	0.000416031	0.157143	Distal-Intergenic	NA	NA	NA			Hypo
Chr4	117528984	117530004	-0.588012	0.00042791	0.158873	Exon-(uc008uiy.1/14664,-exon-4-of-14)	ENSMUSG00000078588	Ccdc24	coiled-coil-domain-containing-24		yes	Hypo
Chr15	79447287	79448507	-0.595456	0.000431828	0.158873	Exon-(uc007wty.2/75729,-exon-16-of-18)	ENSMUSG00000022429	Dmc1	DNA-meiotic-recombinase-1			Hypo
Chr10	13192120	13193473	-0.722806	0.000443276	0.160994	Promoter-(<=1kb)	ENSMUSG00000062866	Phactr2	phosphatase-and-actin-regulator-2			Hypo
Chr9	25088578	25089913	0.768078	0.000459495	0.164526	Intron-(uc009opk.1/235072,-intron-3-of-12)	ENSMUSG00000001833	2021-09-07	septin-7			Hyper
Chr9	45261489	45262547	-0.636024	0.000471143	0.164526	Intron-(uc009pfx.1/114873,-intron-5-of-7)	ENSMUSG00000032087	Dscaml1	DS-cell-adhesion-molecule-like-1		yes	Hypo
Chr15	56519309	56520418	0.789646	0.000474985	0.164526	Promoter-(1-2kb)	ENSMUSG00000086541	Has2os	hyaluronan-synthase-2,-opposite-strand			Hyper
Chr9	75860589	75861997	0.594465	0.000476231	0.164526	Promoter-(<=1kb)	ENSMUSG00000007908	Hmgcll1	3-hydroxymethyl-3-methylglutaryl-Coenzyme-A-lyase-like-1			Hyper
Chr15	27270500	27271698	0.585161	0.000518547	0.174748	Distal-Intergenic	NA	NA	NA			Hyper
Chr8	123743786	123745065	-0.660663	0.000532447	0.174748	Distal-Intergenic	NA	NA	NA			Hypo
Chr7	20341362	20342375	-0.645947	0.000536276	0.174748	3'-UTR	ENSMUSG00000062300	Nectin2	nectin-cell-adhesion-molecule-2			Hypo
Chr1	60536337	60537508	0.739896	0.000540702	0.174748	3'-UTR	ENSMUSG00000026014	Raph1	Ras-association-(RalGDS/AF-6)-and-pleckstrin-homology-domains-1			Hyper
Chr13	21352033	21353115	0.858364	0.000540804	0.174748	Distal-Intergenic	NA	NA	NA			Hyper
Chr5	144412242	144413267	0.642137	0.00054283	0.174748	Promoter-(<=1kb)	ENSMUSG00000018001	Cyth3	cytohesin-3			Hyper
Chr5	64589567	64590600	0.632018	0.000584772	0.186135	Intron-(uc008xmj.1/57915,-intron-3-of-20)	ENSMUSG00000029174	Tbc1d1	TBC1-domain-family,-member-1			Hyper
Chr19	40908858	40910172	-0.535502	0.000600384	0.188981	Intron-(uc012blp.1/240665,-intron-2-of-5)	ENSMUSG00000025010	Ccnj	cyclin-J			Hypo
Chr6	101037769	101039449	-0.614992	0.000609243	0.189662	Distal-Intergenic	NA	NA	NA			Hypo
Chr11	57731786	57732822	-0.680038	0.000636724	0.195306	Distal-Intergenic	NA	NA	NA			Hypo
Chr8	115114002	115115188	0.673893	0.000652522	0.195306	Intron-(uc009nnj.1/170571,-intron-1-of-20)	ENSMUSG00000031772	Cntnap4	contactin-associated-protein-like-4			Hyper
Chr6	54312357	54313399	-0.673482	0.000654599	0.195306	Intron-(uc012eme.1/100042056,-intron-3-of-13)	ENSMUSG00000045725	Prr15	proline-rich-15			Hypo
Chr4	104104193	104105315	0.542483	0.000656116	0.195306	Intron-(uc008txu.1/13131,-intron-3-of-9)	ENSMUSG00000028519	Dab1	disabled-1		yes	Hyper
Chr15	86747452	86748585	0.658141	0.000668478	0.195306	Distal-Intergenic	NA	NA	NA			Hyper
Chr1	25671499	25672575	0.615385	0.000668737	0.195306	Intron-(uc007amw.2/210933,-intron-1-of-28)	ENSMUSG00000033569	Adgrb3	adhesion-G-protein-coupled-receptor-B3			Hyper
Chr18	10173587	10174800	0.661841	0.000692209	0.198342	Intron-(uc008eaq.1/19877,-intron-1-of-32)	ENSMUSG00000024290	Rock1	Rho-associated-coiled-coil-containing-protein-kinase-1		yes	Hyper
Chr1	134031481	134032577	-0.751848	0.000694322	0.198342	Intron-(uc007coh.2/18557,-intron-1-of-15)	ENSMUSG00000026437	Cdk18	cyclin-dependent-kinase-18			Hypo
Chr12	108730513	108731658	-0.714306	0.00070722	0.198342	Distal-Intergenic	NA	NA	NA			Hypo
Chr7	4900652	4901842	-0.529546	0.000715646	0.198342	Distal-Intergenic	NA	NA	NA			Hypo
Chr13	56140095	56141464	-0.578474	0.000718505	0.198342	Intron-(uc007qse.1/uc007qse.1,-intron-2-of-2)	ENSMUSG00000015937	H2afy	H2A-histone-family,-member-Y			Hypo
Chr11	118953535	118954564	-0.673227	0.000721141	0.198342	Distal-Intergenic	NA	NA	NA			Hypo
Chr4	103227851	103229175	0.580026	0.00075088	0.20048	Distal-Intergenic	NA	NA	NA			Hyper
Chr8	34529653	34530656	0.763823	0.000754686	0.20048	Distal-Intergenic	NA	NA	NA			Hyper
Chr18	81193714	81194795	-0.571539	0.000758786	0.20048	Distal-Intergenic	NA	NA	NA			Hypo
Chr15	100884400	100885651	0.583121	0.000769487	0.20048	Distal-Intergenic	NA	NA	NA			Hyper
Chr16	24712036	24713360	0.497787	0.000770925	0.20048	Intron-(uc007yud.2/210126,-intron-7-of-7)	ENSMUSG00000033306	Lpp	LIM-domain-containing-preferred-translocation-partner-in-lipoma	yes	yes	Hyper
Chr18	61489848	61490928	-0.626974	0.000778027	0.20048	Intron-(uc008fbx.1/170826,-intron-1-of-11)	ENSMUSG00000033871	Ppargc1b	peroxisome-proliferative-activated-receptor,-gamma,-coactivator-1-beta			Hypo
Chr13	48149135	48150191	-0.746178	0.000782798	0.20048	Intron-(uc007qib.1/uc007qib.1,-intron-1-of-2)	ENSMUSG00000021379	Id4	inhibitor-of-DNA-binding-4			Hypo
Chr2	29692170	29693202	0.681153	0.000787956	0.20048	Intron-(uc008jag.1/68205,-intron-2-of-4)	ENSMUSG00000065485	Mir219a-2	microRNA-219a-2			Hyper
Chr9	14692965	14694186	0.664654	0.000792607	0.20048	Intron-(uc012gok.1/64931,-intron-2-of-2)	ENSMUSG00000031933	Izumo1r	IZUMO1-receptor,-JUNO			Hyper
Chr10	110608391	110609913	0.469047	0.000806715	0.202243	Intron-(uc007gzx.1/237542,-intron-1-of-5)	ENSMUSG00000020189	Osbpl8	oxysterol-binding-protein-like-8			Hyper
Chr17	5641510	5642551	0.600548	0.00082769	0.205681	Intron-(uc008aff.1/224454,-intron-1-of-8)	ENSMUSG00000034265	Zdhhc14	zinc-finger,-DHHC-domain-containing-14			Hyper
Chr11	51917047	51918070	0.676807	0.000844467	0.208025	Intron-(uc007ivb.1/19052,-intron-1-of-6)	ENSMUSG00000020349	Ppp2ca	protein-phosphatase-2-(formerly-2A),-catalytic-subunit,-alpha-isoform		yes	Hyper
Chr6	64026400	64028021	0.636825	0.000866181	0.211309	Exon-(uc009cdy.1/14804,-exon-7-of-9)	ENSMUSG00000073043	Atoh1	atonal-bHLH-transcription-factor-1		yes	Hyper
Chr12	41276827	41277948	0.604375	0.000873874	0.211309	Intron-(uc007nlc.1/238130,-intron-1-of-5)	ENSMUSG00000035954	Dock4	dedicator-of-cytokinesis-4		yes	Hyper
Chr18	58554747	58555749	0.744845	0.000883225	0.211309	Distal-Intergenic	NA	NA	NA			Hyper
Chr3	146348520	146350085	0.572594	0.000887633	0.211309	Distal-Intergenic	NA	NA	NA			Hyper
Chr13	29811687	29812979	0.626949	0.000902235	0.212966	Intron-(uc007pyn.1/68916,-intron-5-of-15)	ENSMUSG00000006191	Cdkal1	CDK5-regulatory-subunit-associated-protein-1-like-1			Hyper
Chr5	34072363	34073379	-0.528133	0.000909628	0.212966	Exon-(uc008xbe.2/14184,-exon-5-of-18)	ENSMUSG00000054252	Fgfr3	fibroblast-growth-factor-receptor-3		yes	Hypo
Chr10	93846056	93847206	-0.496675	0.00091829	0.213231	Intron-(uc007gvs.1/uc007gvs.1,-intron-1-of-1)	ENSMUSG00000053420	Gm4792	predicted-gene-4792			Hypo
Chr17	12962638	12963854	0.538047	0.000926646	0.213422	Promoter-(<=1kb)	ENSMUSG00000023830	Igf2r	insulin-like-growth-factor-2-receptor		yes	Hyper
Chr13	114356453	114357485	0.828202	0.000952507	0.217609	Distal-Intergenic	NA	NA	NA			Hyper
Chr8	27950139	27951957	0.501595	0.000970529	0.218458	Distal-Intergenic	NA	NA	NA			Hyper
Chr6	114084080	114085143	0.590294	0.000971642	0.218458	Promoter-(2-3kb)	ENSMUSG00000030307	Slc6a11	solute-carrier-family-6-(neurotransmitter-transporter,-GABA),-member-11		yes	Hyper
Chr4	154964407	154965487	-0.700599	0.000985013	0.21972	3'-UTR	ENSMUSG00000029063	Nadk	NAD-kinase		yes	Hypo
Chr1	12982861	12984015	-0.745651	0.00100072	0.219902	Promoter-(1-2kb)	ENSMUSG00000025938	Slco5a1	solute-carrier-organic-anion-transporter-family,-member-5A1			Hypo
Chr17	25029353	25030499	-0.602931	0.00101655	0.219902	Promoter-(1-2kb)	ENSMUSG00000073436	Eme2	essential-meiotic-structure-specific-endonuclease-subunit-2			Hypo
Chr10	128202527	128203582	0.690796	0.00101951	0.219902	3'-UTR	ENSMUSG00000064030	Pym1	PYM-homolog-1,-exon-junction-complex-associated-factor			Hyper
Chr10	115487738	115488852	0.681527	0.00102015	0.219902	Intron-(uc007hbp.2/19279,-intron-2-of-13)	ENSMUSG00000020151	Ptprr	protein-tyrosine-phosphatase,-receptor-type,-R		yes	Hyper
Chr12	81624748	81625921	0.56439	0.00102767	0.219902	Intron-(uc007oaw.1/108760,-intron-2-of-15)	ENSMUSG00000021130	Galnt16	polypeptide-N-acetylgalactosaminyltransferase-16			Hyper
Chr6	142910634	142912218	0.470358	0.00103241	0.219902	Promoter-(<=1kb)	ENSMUSG00000030283	St8sia1	ST8-alpha-N-acetyl-neuraminide-alpha-2,8-sialyltransferase-1			Hyper
Chr18	31767010	31768843	0.483976	0.00104599	0.221133	Promoter-(<=1kb)	ENSMUSG00000024259	Slc25a46	solute-carrier-family-25,-member-46			Hyper
Chr2	159879783	159881020	-0.577918	0.00110618	0.232125	Distal-Intergenic	NA	NA	NA			Hypo
Chr5	149716284	149717596	-0.450224	0.00112225	0.232261	Exon-(uc009aow.2/231912,-exon-4-of-11)	ENSMUSG00000041298	Katnal1	katanin-p60-subunit-A-like-1			Hypo
Chr8	124826268	124827299	-0.461046	0.0011238	0.232261	Intron-(uc009nsj.1/22761,-intron-1-of-9)	ENSMUSG00000049577	Zfpm1	zinc-finger-protein,-multitype-1			Hypo
Chr5	131195735	131196821	0.674407	0.00113921	0.232261	Intron-(uc008zum.2/140904,-intron-5-of-6)	ENSMUSG00000060371	Caln1	calneuron-1		yes	Hyper
Chr9	115095194	115096777	0.427317	0.00113962	0.232261	Intron-(uc009ryl.1/74486,-intron-6-of-11)	NA	Stmn1-rs1	stathmin-1,-related-sequence-1			Hyper
Chr1	174582213	174583352	-0.613497	0.0011603	0.234787	Distal-Intergenic	NA	NA	NA			Hypo
Chr3	152080601	152081666	0.550519	0.00117748	0.236573	Promoter-(1-2kb)	ENSMUSG00000039068	Zzz3	zinc-finger,-ZZ-domain-containing-3			Hyper
Chr12	30526907	30527971	-0.791127	0.00119019	0.237442	Promoter-(1-2kb)	ENSMUSG00000061911	Myt1l	myelin-transcription-factor-1-like	yes	yes	Hypo
Chr15	64117841	64118912	0.566782	0.00120962	0.239632	Intron-(uc007vzh.1/13196,-intron-1-of-28)	ENSMUSG00000022377	Asap1	ArfGAP-with-SH3-domain,-ankyrin-repeat-and-PH-domain1			Hyper
Chr7	31209866	31211350	0.592977	0.00122038	0.240085	Promoter-(1-2kb)	ENSMUSG00000036931	Nfkbid	nuclear-factor-of-kappa-light-polypeptide-gene-enhancer-in-B-cells-inhibitor,-delta			Hyper
Chr1	133360617	133361705	0.633932	0.0012351	0.241305	Intron-(uc007cng.2/14270,-intron-2-of-22)	ENSMUSG00000026425	Srgap2	SLIT-ROBO-Rho-GTPase-activating-protein-2		yes	Hyper
Chr1	91197420	91198914	0.498174	0.00127939	0.246215	Distal-Intergenic	NA	NA	NA			Hyper
Chr3	52846558	52847972	-0.518427	0.00128007	0.246215	Promoter-(1-2kb)	ENSMUSG00000048332	Lhfp	lipoma-HMGIC-fusion-partner			Hypo
Chr6	113665159	113666169	-0.755423	0.00128795	0.246215	3'-UTR	ENSMUSG00000064177	Ghrl	ghrelin			Hypo
Chr2	178416341	178417409	-0.60836	0.00129919	0.246215	Distal-Intergenic	NA	NA	NA			Hypo
Chr18	66326788	66328512	0.510367	0.00130369	0.246215	Intron-(uc008ffp.1/320924,-intron-1-of-9)	ENSMUSG00000076147	Mir694	microRNA-694			Hyper
Chr10	120734527	120735624	-0.558284	0.00135921	0.253818	Promoter-(2-3kb)	ENSMUSG00000052302	Tbc1d30	TBC1-domain-family,-member-30			Hypo
Chr9	21282888	21284101	-0.576782	0.00136414	0.253818	Promoter-(<=1kb)	ENSMUSG00000033335	Dnm2	dynamin-2		yes	Hypo
Chr6	39645825	39647333	0.596894	0.00137082	0.253818	Intron-(uc009bme.1/109880,-intron-1-of-21)	ENSMUSG00000002413	Braf	Braf-transforming-gene		yes	Hyper
Chr13	56627989	56629155	-0.590308	0.00138974	0.25565	5'-UTR	ENSMUSG00000035509	Fbxl21	F-box-and-leucine-rich-repeat-protein-21		yes	Hypo
Chr2	53933633	53935535	0.502146	0.00140134	0.25612	Promoter-(2-3kb)	ENSMUSG00000075334	Rprm	reprimo,-TP53-dependent-G2-arrest-mediator-candidate			Hyper
Chr1	178864649	178865728	0.525147	0.00143103	0.259722	Intron-(uc011wxh.1/76816,-intron-14-of-15)	ENSMUSG00000026504	Sdccag8	serologically-defined-colon-cancer-antigen-8		yes	Hyper
Chr10	13524345	13525755	0.554055	0.00143939	0.259722	Intron-(uc007elb.1/66253,-intron-2-of-5)	ENSMUSG00000019806	Aig1	androgen-induced-1			Hyper
Chr5	33538962	33540000	0.757261	0.00145663	0.261145	Distal-Intergenic	NA	NA	NA			Hyper
Chr17	83387028	83388205	-0.76944	0.00146571	0.261145	Distal-Intergenic	NA	NA	NA			Hypo
Chr12	33988125	33990568	0.373228	0.00147682	0.26148	Promoter-(<=1kb)	ENSMUSG00000020564	Atxn7l1	ataxin-7-like-1			Hyper
Chr10	121222292	121223899	-0.484259	0.00149559	0.261521	3'-UTR	ENSMUSG00000020121	Srgap1	SLIT-ROBO-Rho-GTPase-activating-protein-1			Hypo
Chr11	57476555	57477772	-0.470861	0.00150051	0.261521	Intron-(uc007jaa.1/171212,-intron-1-of-2)	ENSMUSG00000020520	Galnt10	polypeptide-N-acetylgalactosaminyltransferase-10			Hypo
Chr11	96816848	96817939	-0.637159	0.00151285	0.261521	Exon-(uc007ldf.1/78912,-exon-5-of-7)	ENSMUSG00000078700	D030028A08Rik	RIKEN-cDNA-D030028A08-gene			Hypo
Chr6	25759316	25760594	0.813479	0.00151398	0.261521	Promoter-(<=1kb)	ENSMUSG00000029676	Pot1a	protection-of-telomeres-1A			Hyper
Chr4	21672235	21673751	-0.587151	0.00155055	0.263427	3'-UTR	ENSMUSG00000028252	Ccnc	cyclin-C			Hypo
Chr5	141674773	141675788	-0.69165	0.0015519	0.263427	Distal-Intergenic	NA	NA	NA			Hypo
Chr2	73322890	73324203	-0.447515	0.00155457	0.263427	Promoter-(<=1kb)	ENSMUSG00000075284	Wipf1	WAS/WASL-interacting-protein-family,-member-1		yes	Hypo
Chr1	66273429	66274578	0.583923	0.00156266	0.263427	Intron-(uc007bhw.1/17756,-intron-2-of-14)	ENSMUSG00000015222	Map2	microtubule-associated-protein-2			Hyper
Chr9	44453704	44454884	0.535034	0.00157151	0.263427	Distal-Intergenic	NA	NA	NA			Hyper
Chr9	21744810	21746017	0.645089	0.00161342	0.266985	Promoter-(2-3kb)	ENSMUSG00000040563	Plppr2	phospholipid-phosphatase-related-2			Hyper
Chr15	7349291	7350848	-0.527009	0.00164894	0.266985	Promoter-(<=1kb)	ENSMUSG00000042961	Egflam	EGF-like,-fibronectin-type-III-and-laminin-G-domains		yes	Hypo
Chr12	26440408	26441731	0.626944	0.00165776	0.266985	Distal-Intergenic	NA	NA	NA			Hyper
Chr1	17048644	17049981	0.568992	0.00167151	0.266985	Intron-(uc007aka.1/57339,-intron-2-of-4)	ENSMUSG00000042686	Jph1	junctophilin-1			Hyper
Chr14	121274745	121276202	-0.433316	0.00167333	0.266985	Distal-Intergenic	NA	NA	NA			Hypo
Chr16	97248048	97249224	0.605828	0.00167357	0.266985	Intron-(uc008add.1/13508,-intron-3-of-32)	ENSMUSG00000050272	Dscam	DS-cell-adhesion-molecule	yes	yes	Hyper
Chr9	99330347	99331445	-0.590248	0.00171022	0.266985	Intron-(uc009rec.1/17532,-intron-1-of-5)	ENSMUSG00000032470	Mras	muscle-and-microspikes-RAS			Hypo
ChrX	109483997	109485051	0.854541	0.00173241	0.266985	Intron-(uc009udh.1/68117,-intron-8-of-8)	ENSMUSG00000025527	Satl1	spermidine/spermine-N1-acetyl-transferase-like-1			Hyper
Chr9	57911618	57912732	0.57599	0.00174055	0.266985	Promoter-(<=1kb)	ENSMUSG00000032327	Stra6	stimulated-by-retinoic-acid-gene-6			Hyper
Chr15	84813659	84815120	0.454276	0.00174253	0.266985	Intron-(uc007xcr.1/223739,-intron-1-of-9)	ENSMUSG00000036046	5031439G07Rik	RIKEN-cDNA-5031439G07-gene			Hyper
Chr2	33101279	33102448	0.491394	0.00176137	0.266985	Promoter-(<=1kb)	ENSMUSG00000038831	Ralgps1	Ral-GEF-with-PH-domain-and-SH3-binding-motif-1			Hyper
Chr12	37165565	37166625	0.565876	0.00177006	0.266985	Intron-(uc007njy.2/75847,-intron-3-of-4)	ENSMUSG00000043153	Ispd	isoprenoid-synthase-domain-containing			Hyper
Chr4	55227731	55228887	-0.599451	0.00177383	0.266985	Distal-Intergenic	NA	NA	NA			Hypo
Chr12	109299655	109301089	-0.52855	0.00177932	0.266985	Distal-Intergenic	NA	NA	NA			Hypo
Chr10	93983806	93985016	-0.526857	0.00178857	0.266985	Intron-(uc007gvt.2/319880,-intron-1-of-3)	ENSMUSG00000020023	Tmcc3	transmembrane-and-coiled-coil-domains-3		yes	Hypo
Chr10	59463522	59464570	-0.585625	0.00181001	0.266985	Promoter-(<=1kb)	ENSMUSG00000044475	Ascc1	activating-signal-cointegrator-1-complex-subunit-1			Hypo
Chr3	25592825	25594157	0.611853	0.00181509	0.266985	Intron-(uc008otb.1/192167,-intron-3-of-5)	ENSMUSG00000063887	Nlgn1	neuroligin-1		yes	Hyper
Chr6	21512113	21513228	0.527723	0.00181682	0.266985	Intron-(uc009baq.1/16508,-intron-1-of-5)	ENSMUSG00000029669	Tspan12	tetraspanin-12			Hyper
Chr17	34173068	34174869	-0.411894	0.00182678	0.266985	Promoter-(1-2kb)	ENSMUSG00000024330	Col11a2	collagen,-type-XI,-alpha-2			Hypo
Chr10	96293397	96294440	0.592128	0.00183135	0.266985	Distal-Intergenic	NA	NA	NA			Hyper
Chr7	148617057	148618198	-0.465145	0.00184053	0.266985	Promoter-(<=1kb)	ENSMUSG00000019082	Slc25a22	solute-carrier-family-25-(mitochondrial-carrier,-glutamate),-member-22			Hypo
Chr1	74454558	74455570	-0.637981	0.0018441	0.266985	Promoter-(<=1kb)	ENSMUSG00000026175	Vil1	villin-1	yes		Hypo
Chr6	116592689	116593939	-0.790512	0.00186302	0.266985	3'-UTR	ENSMUSG00000048489	Depp1	DEPP1-autophagy-regulator			Hypo
Chr16	11249678	11250752	0.699498	0.0018661	0.266985	Intron-(uc007yfe.2/14852,-intron-1-of-14)	ENSMUSG00000062203	Gspt1	G1-to-S-phase-transition-1		yes	Hyper
Chr15	32485508	32487425	0.440646	0.00186995	0.266985	Intron-(uc007vkp.1/20356,-intron-8-of-8)	ENSMUSG00000022231	Sema5a	sema-domain,-seven-thrombospondin-repeats-(type-1-and-type-1-like),-transmembrane-domain-(TM)-and-short-cytoplasmic-domain,-(semaphorin)-5A		yes	Hyper
Chr4	105788935	105790301	-0.590946	0.00187282	0.266985	Distal-Intergenic	NA	NA	NA			Hypo
Chr15	96870689	96871764	0.537827	0.0018778	0.266985	Intron-(uc007xkr.1/69354,-intron-1-of-15)	ENSMUSG00000022464	Slc38a4	solute-carrier-family-38,-member-4			Hyper
Chr17	27571360	27572859	-0.452403	0.00187973	0.266985	Exon-(uc008bow.1/268934,-exon-8-of-9)	ENSMUSG00000063239	Grm4	glutamate-receptor,-metabotropic-4		yes	Hypo
Chr18	64030795	64032305	0.465145	0.00188387	0.266985	Intron-(uc008fea.2/104082,-intron-21-of-27)	ENSMUSG00000040560	Wdr7	WD-repeat-domain-7		yes	Hyper
Chr6	99446227	99447348	0.474551	0.00188704	0.266985	Intron-(uc012epq.1/108655,-intron-1-of-19)	ENSMUSG00000030067	Foxp1	forkhead-box-P1	yes		Hyper
Chr1	190094222	190095367	-0.617385	0.00189159	0.266985	Intron-(uc007ead.1/22283,-intron-2-of-4)	ENSMUSG00000026609	Ush2a	usherin			Hypo
Chr5	67251112	67252445	0.457065	0.00189432	0.266985	Intron-(uc008xph.1/77569,-intron-2-of-25)	ENSMUSG00000037736	Limch1	LIM-and-calponin-homology-domains-1			Hyper
Chr10	80326897	80328009	-0.407335	0.0019109	0.267793	Promoter-(1-2kb)	ENSMUSG00000035206	Sppl2b	signal-peptide-peptidase-like-2B			Hypo
Chr11	20504894	20506109	0.582626	0.00193599	0.267793	Intron-(uc007idc.1/58172,-intron-1-of-1)	ENSMUSG00000049800	Sertad2	SERTA-domain-containing-2			Hyper
Chr11	119858312	119859484	-0.455721	0.00194549	0.267793	Exon-(uc007mrg.1/108100,-exon-9-of-14)	ENSMUSG00000105524	Mir3065	microRNA-3065			Hypo
Chr17	27947429	27949212	0.384154	0.00195147	0.267793	Intron-(uc008bpp.1/224647,-intron-1-of-4)	ENSMUSG00000056692	D17Wsu92e	DNA-segment,-Chr-17,-Wayne-State-University-92,-expressed			Hyper
Chr7	109225206	109226239	0.783521	0.00195471	0.267793	Promoter-(<=1kb)	ENSMUSG00000100254	Trpc2	transient-receptor-potential-cation-channel,-subfamily-C,-member-2			Hyper
Chr18	56696803	56697808	0.599363	0.00195677	0.267793	Exon-(uc008eyn.2/110695,-exon-11-of-18)	ENSMUSG00000053644	Aldh7a1	aldehyde-dehydrogenase-family-7,-member-A1		yes	Hyper
Chr12	113336892	113338053	-0.587045	0.0019762	0.268042	Distal-Intergenic	NA	NA	NA			Hypo
Chr7	129513504	129514604	0.658508	0.00198427	0.268042	Intron-(uc009jot.1/18751,-intron-2-of-16)	ENSMUSG00000052889	Prkcb	protein-kinase-C,-beta		yes	Hyper
Chr10	11003444	11005803	0.417617	0.00198974	0.268042	Promoter-(2-3kb)	ENSMUSG00000047648	Fbxo30	F-box-protein-30			Hyper
Chr5	43744133	43745289	0.463031	0.00199643	0.268042	Distal-Intergenic	NA	NA	NA			Hyper
Chr11	3748178	3749943	0.416823	0.00202619	0.268783	Intron-(uc007htq.1/74309,-intron-1-of-13)	ENSMUSG00000020435	Osbp2	oxysterol-binding-protein-2			Hyper
Chr15	82088272	82090417	-0.414806	0.00203329	0.268783	Promoter-(1-2kb)	ENSMUSG00000068099	1500009C09Rik	RIKEN-cDNA-1500009C09-gene			Hypo
Chr2	27594380	27595652	-0.494855	0.00203965	0.268783	Intron-(uc008ixs.1/20181,-intron-2-of-9)	ENSMUSG00000015846	Rxra	retinoid-X-receptor-alpha		yes	Hypo
Chr9	42749399	42751357	-0.458435	0.00205244	0.268783	Promoter-(1-2kb)	ENSMUSG00000032017	Grik4	glutamate-receptor,-ionotropic,-kainate-4		yes	Hypo
Chr5	3691533	3692565	0.50886	0.00207134	0.268783	3'-UTR	ENSMUSG00000040351	Ankib1	ankyrin-repeat-and-IBR-domain-containing-1			Hyper
Chr5	148750380	148751395	-0.720926	0.00207326	0.268783	Distal-Intergenic	NA	NA	NA			Hypo
Chr18	75713735	75714758	0.615419	0.00207467	0.268783	Intron-(uc008fqg.1/269037,-intron-7-of-11)	ENSMUSG00000052928	Ctif	CBP80/20-dependent-translation-initiation-factor			Hyper
Chr3	129605435	129606567	-0.667573	0.00210412	0.268783	Promoter-(1-2kb)	ENSMUSG00000027997	Casp6	caspase-6			Hypo
Chr18	43801614	43802813	0.616147	0.00210469	0.268783	Intron-(uc008euk.2/76217,-intron-1-of-21)	ENSMUSG00000024502	Jakmip2	janus-kinase-and-microtubule-interacting-protein-2			Hyper
Chr14	76429377	76430612	0.638037	0.00215159	0.268783	Distal-Intergenic	NA	NA	NA			Hyper
Chr11	32739577	32740889	0.688416	0.00215909	0.268783	Distal-Intergenic	NA	NA	NA			Hyper
Chr11	94287490	94288979	-0.513163	0.00216842	0.268783	Exon-(uc007kyq.2/12291,-exon-12-of-25)	ENSMUSG00000020866	Cacna1g	calcium-channel,-voltage-dependent,-T-type,-alpha-1G-subunit			Hypo
Chr17	39984062	39985948	-0.36625	0.00218002	0.268783	Promoter-(2-3kb)	NA	NA	NA			Hypo
Chr12	25762676	25764021	-0.53637	0.0021804	0.268783	Distal-Intergenic	NA	NA	NA			Hypo
Chr3	66790317	66791476	0.582489	0.00218436	0.268783	Promoter-(<=1kb)	ENSMUSG00000034544	Rsrc1	arginine/serine-rich-coiled-coil-1		yes	Hyper
Chr18	62696098	62697199	0.554779	0.00219233	0.268783	Intron-(uc012bdv.1/107035,-intron-2-of-21)	ENSMUSG00000042211	Fbxo38	F-box-protein-38			Hyper
Chr11	23112745	23113896	0.766972	0.00221564	0.268783	Distal-Intergenic	NA	NA	NA			Hyper
Chr3	55505331	55506457	0.712446	0.00221668	0.268783	Intron-(uc008pgt.2/26422,-intron-6-of-18)	ENSMUSG00000056947	Mab21l1	mab-21-like-1-(C.-elegans)		yes	Hyper
Chr8	83419303	83420350	0.595649	0.0022197	0.268783	Distal-Intergenic	NA	NA	NA			Hyper
Chr6	49043667	49045731	0.476987	0.00222134	0.268783	Promoter-(<=1kb)	ENSMUSG00000029814	Igf2bp3	insulin-like-growth-factor-2-mRNA-binding-protein-3		yes	Hyper
Chr12	55800086	55801272	-0.644755	0.00222685	0.268783	Distal-Intergenic	NA	NA	NA			Hypo
Chr19	14443936	14445291	0.556144	0.00222706	0.268783	Distal-Intergenic	NA	NA	NA			Hyper
Chr17	31783669	31784719	-0.497745	0.00224409	0.268783	3'-UTR	ENSMUSG00000024039	Cbs	cystathionine-beta-synthase		yes	Hypo
Chr5	108355216	108356280	0.566018	0.00225251	0.268783	Intron-(uc008yni.2/67266,-intron-1-of-4)	ENSMUSG00000058558	Rpl5	ribosomal-protein-L5		yes	Hyper
Chr9	52610589	52611748	0.706826	0.00225688	0.268783	Distal-Intergenic	NA	NA	NA			Hyper
Chr12	41792913	41794826	0.614736	0.00226446	0.268783	Intron-(uc007nll.1/93757,-intron-2-of-6)	ENSMUSG00000056899	Immp2l	IMP2-inner-mitochondrial-membrane-peptidase-like-(S.-cerevisiae)	yes		Hyper
Chr9	42900513	42901636	0.535575	0.0022667	0.268783	Intron-(uc009pba.1/69632,-intron-1-of-40)	ENSMUSG00000059495	Arhgef12	Rho-guanine-nucleotide-exchange-factor-(GEF)-12			Hyper
Chr11	116909234	116910354	0.532832	0.00227419	0.268783	Distal-Intergenic	NA	NA	NA			Hyper
Chr18	80894332	80895369	0.434139	0.00228136	0.268783	Exon-(uc012bfk.1/18018,-exon-2-of-10)	ENSMUSG00000033016	Nfatc1	nuclear-factor-of-activated-T-cells,-cytoplasmic,-calcineurin-dependent-1		yes	Hyper
Chr18	58386202	58387623	-0.576814	0.00228916	0.268783	Distal-Intergenic	NA	NA	NA			Hypo
Chr6	11877227	11878749	0.485796	0.00229608	0.268783	Promoter-(1-2kb)	ENSMUSG00000029629	Phf14	PHD-finger-protein-14			Hyper
Chr17	14783704	14784729	0.684577	0.00231794	0.270226	Distal-Intergenic	NA	NA	NA			Hyper
Chr18	36458678	36460402	0.476329	0.00236538	0.272783	Distal-Intergenic	NA	NA	NA			Hyper
Chr14	93467750	93468921	0.511741	0.00237321	0.272783	Intron-(uc007uul.1/211712,-intron-2-of-2)	ENSMUSG00000055421	Pcdh9	protocadherin-9		yes	Hyper
Chr11	67473182	67474417	0.493139	0.00238533	0.272783	Exon-(uc011xwn.1/14457,-exon-6-of-14)	ENSMUSG00000033066	Gas7	growth-arrest-specific-7			Hyper
Chr18	65453037	65454376	-0.52877	0.00238676	0.272783	Exon-(uc008feu.2/225638,-exon-7-of-13)	ENSMUSG00000065402	Mir122	microRNA-122			Hypo
Chr2	4798330	4799756	-0.511832	0.00240291	0.272783	Promoter-(2-3kb)	ENSMUSG00000026662	Sephs1	selenophosphate-synthetase-1		yes	Hypo
Chr9	49303283	49304351	-0.628068	0.00240672	0.272783	Distal-Intergenic	NA	NA	NA			Hypo
Chr6	31489718	31491654	-0.420981	0.00240728	0.272783	Intron-(uc009bgh.2/27205,-intron-1-of-7)	ENSMUSG00000025608	Podxl	podocalyxin-like			Hypo
Chr9	40860388	40861592	-0.541591	0.00241814	0.272922	Intron-(uc009pag.1/72828,-intron-1-of-13)	ENSMUSG00000032021	Crtam	cytotoxic-and-regulatory-T-cell-molecule			Hypo
Chr14	93871420	93873053	0.520324	0.0024631	0.276893	Intron-(uc007uul.1/211712,-intron-1-of-2)	ENSMUSG00000055421	Pcdh9	protocadherin-9		yes	Hyper
Chr19	6412631	6413693	-0.463525	0.00249906	0.278406	Exon-(uc008gip.1/19395,-exon-13-of-17)	ENSMUSG00000032946	Rasgrp2	RAS,-guanyl-releasing-protein-2			Hypo
Chr15	85844949	85845984	-0.483831	0.0025013	0.278406	Intron-(uc007xdt.1/12614,-intron-1-of-34)	ENSMUSG00000016028	Celsr1	cadherin,-EGF-LAG-seven-pass-G-type-receptor-1		yes	Hypo
Chr15	74359374	74360388	-0.550801	0.00250604	0.278406	5'-UTR	ENSMUSG00000034730	Adgrb1	adhesion-G-protein-coupled-receptor-B1			Hypo
Chr10	108391727	108392756	0.935262	0.00252001	0.278794	Intron-(uc007gzg.1/20979,-intron-1-of-10)	ENSMUSG00000035864	Syt1	synaptotagmin-I		yes	Hyper
Chr4	140254333	140255646	0.522188	0.00253751	0.278794	Promoter-(1-2kb)	ENSMUSG00000040945	Rcc2	regulator-of-chromosome-condensation-2		yes	Hyper
Chr1	188445673	188447045	0.502161	0.00253906	0.278794	Downstream-(<1kb)	ENSMUSG00000039239	Tgfb2	transforming-growth-factor,-beta-2		yes	Hyper
Chr2	173521792	173522974	-0.497191	0.00256128	0.279746	Intron-(uc008oed.1/19334,-intron-6-of-6)	ENSMUSG00000057047	1700010B08Rik	RIKEN-cDNA-1700010B08-gene			Hypo
Chr16	43943022	43944795	0.446442	0.00257687	0.279746	Exon-(uc007zgo.2/212153,-exon-9-of-16)	ENSMUSG00000022704	Qtrt2	queuine-tRNA-ribosyltransferase-accessory-subunit-2			Hyper
Chr11	89701723	89702883	0.672145	0.00257735	0.279746	Distal-Intergenic	NA	NA	NA			Hyper
Chr14	61993373	61995029	-0.450277	0.00258762	0.279789	Intron-(uc007ufw.2/16648,-intron-10-of-16)	ENSMUSG00000021928	Ebpl	emopamil-binding-protein-like			Hypo
Chr4	141682401	141683478	-0.596954	0.00261064	0.279925	Intron-(uc008vpv.2/71529,-intron-7-of-13)	ENSMUSG00000040606	Kazn	kazrin,-periplakin-interacting-protein			Hypo
Chr7	29290676	29291904	-0.648686	0.00261508	0.279925	Downstream-(1-2kb)	ENSMUSG00000059128	Ifnl2	interferon-lambda-2			Hypo
Chr15	75578885	75580277	-0.602741	0.00262605	0.279925	Promoter-(<=1kb)	ENSMUSG00000047591	Mafa	v-maf-musculoaponeurotic-fibrosarcoma-oncogene-family,-protein-A-(avian)		yes	Hypo
Chr4	56991726	56992795	0.552362	0.00263468	0.279925	Intron-(uc008sxx.2/230235,-intron-1-of-4)	ENSMUSG00000045589	Frrs1l	ferric-chelate-reductase-1-like			Hyper
Chr2	167828542	167829698	-0.506175	0.00263828	0.279925	Intron-(uc008oal.1/69553,-intron-2-of-21)	ENSMUSG00000074577	Ripor3	RIPOR-family-member-3			Hypo
Chr16	30869834	30870886	0.629704	0.00265162	0.28029	Distal-Intergenic	NA	NA	NA			Hyper
Chr3	114662353	114663396	0.766425	0.00270042	0.283605	Intron-(uc008rbm.1/229759,-intron-1-of-5)	ENSMUSG00000027965	Olfm3	olfactomedin-3			Hyper
Chr13	54677309	54678337	-0.611621	0.00271589	0.283605	Promoter-(<=1kb)	ENSMUSG00000025870	Arl10	ADP-ribosylation-factor-like-10			Hypo
Chr7	108303079	108304145	0.557717	0.00271634	0.283605	Intron-(uc009ioc.2/207278,-intron-3-of-20)	ENSMUSG00000030691	Fchsd2	FCH-and-double-SH3-domains-2			Hyper
Chr4	131975965	131977117	-0.577517	0.00272764	0.283605	Promoter-(1-2kb)	ENSMUSG00000066043	Phactr4	phosphatase-and-actin-regulator-4			Hypo
Chr10	59331155	59332242	-0.498635	0.00273303	0.283605	Distal-Intergenic	NA	NA	NA			Hypo
Chr2	93354249	93355359	-0.63497	0.00274825	0.28383	Distal-Intergenic	NA	NA	NA			Hypo
Chr5	37095653	37096675	0.613366	0.0027836	0.28383	Distal-Intergenic	NA	NA	NA			Hyper
Chr5	28399685	28400796	0.562078	0.00280502	0.28383	Promoter-(1-2kb)	ENSMUSG00000045294	Insig1	insulin-induced-gene-1		yes	Hyper
Chr2	140600845	140602081	0.500351	0.00280696	0.28383	Intron-(uc008mpu.1/72899,-intron-3-of-3)	ENSMUSG00000051379	Flrt3	fibronectin-leucine-rich-transmembrane-protein-3			Hyper
Chr16	46362323	46363361	-0.587554	0.00282135	0.28383	Distal-Intergenic	NA	NA	NA			Hypo
Chr7	118717375	118718386	-0.574581	0.00283421	0.28383	Intron-(uc009jgc.1/233733,-intron-3-of-10)	ENSMUSG00000038296	Galnt18	polypeptide-N-acetylgalactosaminyltransferase-18			Hypo
Chr17	56742568	56743661	-0.495569	0.00283869	0.28383	Exon-(uc012avv.1/224903,-exon-15-of-21)	ENSMUSG00000071054	Safb	scaffold-attachment-factor-B		yes	Hypo
Chr6	47444376	47445390	0.5461	0.00284055	0.28383	Exon-(uc009bsz.1/26965,-exon-3-of-20)	ENSMUSG00000029686	Cul1	cullin-1		yes	Hyper
Chr5	122323274	122324320	0.448035	0.00284693	0.28383	Exon-(uc008zkm.1/13048,-exon-16-of-23)	ENSMUSG00000042589	Cux2	cut-like-homeobox-2		yes	Hyper
Chr4	151934690	151935769	-0.461975	0.00285767	0.28383	Exon-(uc008wap.1/260305,-exon-27-of-30)	ENSMUSG00000039577	Nphp4	nephronophthisis-4-(juvenile)-homolog-(human)			Hypo
Chr1	59284923	59285998	0.567038	0.00285965	0.28383	Intron-(uc011wlp.1/74018,-intron-1-of-33)	ENSMUSG00000026024	Als2	alsin-Rho-guanine-nucleotide-exchange-factor		yes	Hyper
Chr19	57345790	57346804	0.444874	0.00288796	0.28383	Intron-(uc008hzv.1/226251,-intron-1-of-12)	ENSMUSG00000025085	Ablim1	actin-binding-LIM-protein-1			Hyper
Chr5	125479664	125480998	-0.427114	0.00289797	0.28383	Promoter-(2-3kb)	ENSMUSG00000037962	Rflna	refilin-A			Hypo
Chr15	58900438	58901644	-0.411864	0.00290403	0.28383	Intron-(uc007vty.2/211401,-intron-1-of-14)	ENSMUSG00000022353	Mtss1	metastasis-suppressor-1		yes	Hypo
Chr6	54731241	54732266	-0.506304	0.00291503	0.28383	Distal-Intergenic	NA	NA	NA			Hypo
Chr4	137232915	137233953	-0.507585	0.0029196	0.28383	Intron-(uc008vjm.1/110351,-intron-1-of-23)	ENSMUSG00000041351	Rap1gap	Rap1-GTPase-activating-protein		yes	Hypo
Chr2	164033815	164034982	0.566226	0.00292716	0.28383	Distal-Intergenic	NA	NA	NA			Hyper
Chr18	69621251	69622535	0.445427	0.00293841	0.28383	Exon-(uc008fnp.1/21413,-exon-3-of-7)	ENSMUSG00000053477	Tcf4	transcription-factor-4	yes	yes	Hyper
Chr16	23273323	23274420	-0.453102	0.00294852	0.28383	Intron-(uc007yto.1/20440,-intron-2-of-7)	ENSMUSG00000022885	St6gal1	beta-galactoside-alpha-2,6-sialyltransferase-1			Hypo
Chr19	32568722	32569757	-0.478353	0.00294974	0.28383	Intron-(uc008hfk.2/17330,-intron-3-of-4)	ENSMUSG00000024896	Minpp1	multiple-inositol-polyphosphate-histidine-phosphatase-1			Hypo
Chr4	68071271	68072364	0.718347	0.00295224	0.28383	Distal-Intergenic	NA	NA	NA			Hyper
Chr8	36904416	36905681	-0.637445	0.00296528	0.28383	Distal-Intergenic	NA	NA	NA			Hypo
Chr7	97189197	97190945	0.45124	0.00296564	0.28383	Exon-(uc009igl.1/319711,-exon-4-of-6)	ENSMUSG00000097585	E230029C05Rik	RIKEN-cDNA-E230029C05-gene			Hyper
Chr2	167208904	167209947	-0.537279	0.00299451	0.284886	Distal-Intergenic	NA	NA	NA			Hypo
Chr10	77873090	77874195	-0.423749	0.00300451	0.284886	Promoter-(1-2kb)	ENSMUSG00000061032	Rrp1	ribosomal-RNA-processing-1-homolog-(S.-cerevisiae)		yes	Hypo
Chr9	88323538	88324805	0.484027	0.00300685	0.284886	Intron-(uc009qyl.2/244962,-intron-1-of-27)	ENSMUSG00000032422	Snx14	sorting-nexin-14			Hyper
Chr2	109760076	109761161	0.557377	0.00302547	0.285695	Promoter-(2-3kb)	ENSMUSG00000050199	Lgr4	leucine-rich-repeat-containing-G-protein-coupled-receptor-4			Hyper
Chr7	151294068	151295476	-0.612815	0.00305612	0.28763	Distal-Intergenic	NA	NA	NA			Hypo
Chr1	169282266	169283395	0.46807	0.00306992	0.287973	Promoter-(2-3kb)	ENSMUSG00000026687	Aldh9a1	aldehyde-dehydrogenase-9,-subfamily-A1		yes	Hyper
Chr11	115681632	115682814	-0.449101	0.00308304	0.288249	Promoter-(<=1kb)	ENSMUSG00000020781	Tsen54	tRNA-splicing-endonuclease-subunit-54			Hypo
Chr8	11559926	11560943	-0.596769	0.00310426	0.288315	Promoter-(1-2kb)	ENSMUSG00000045969	Ing1	inhibitor-of-growth-family,-member-1			Hypo
Chr16	63716128	63717200	0.622469	0.00310657	0.288315	Intron-(uc007zpy.1/13837,-intron-3-of-16)	ENSMUSG00000052504	Epha3	Eph-receptor-A3		yes	Hyper
Chr2	172291114	172292354	-0.43703	0.00311696	0.288315	3'-UTR	ENSMUSG00000027505	Fam209	family-with-sequence-similarity-209			Hypo
Chr3	138417529	138418611	0.561283	0.00312792	0.288315	Intron-(uc008rnp.1/56224,-intron-1-of-7)	ENSMUSG00000028152	Tspan5	tetraspanin-5			Hyper
Chr15	87343365	87344958	0.448628	0.00314074	0.288315	Distal-Intergenic	NA	NA	NA			Hyper
Chr1	43350002	43351065	-0.565619	0.00315065	0.288315	Distal-Intergenic	NA	NA	NA			Hypo
Chr3	65346175	65347221	0.7199	0.00316778	0.288315	Intron-(uc008pkr.1/99929,-intron-2-of-5)	ENSMUSG00000074580	4931440P22Rik	RIKEN-cDNA-4931440P22-gene			Hyper
Chr3	148944184	148945570	0.493574	0.00317695	0.288315	Distal-Intergenic	NA	NA	NA			Hyper
Chr13	42543666	42544721	0.674056	0.003182	0.288315	Distal-Intergenic	NA	NA	NA			Hyper
Chr6	114397714	114398719	-0.674705	0.00318552	0.288315	Intron-(uc009dhw.1/15465,-intron-2-of-2)	ENSMUSG00000053004	Hrh1	histamine-receptor-H1		yes	Hypo
Chr10	81002865	81005197	-0.308547	0.00320941	0.289552	Promoter-(2-3kb)	ENSMUSG00000034781	Gna11	guanine-nucleotide-binding-protein,-alpha-11		yes	Hypo
Chr12	72461267	72463031	0.459181	0.00322775	0.290282	Intron-(uc007nus.1/uc007nus.1,-intron-2-of-5)	ENSMUSG00000044548	Dact1	dishevelled-binding-antagonist-of-beta-catenin-1			Hyper
Chr19	41894570	41895964	0.551654	0.00325614	0.291909	Distal-Intergenic	NA	NA	NA			Hyper
Chr13	34153944	34155285	-0.435722	0.00330057	0.294119	Intron-(uc007qba.1/68021,-intron-5-of-6)	ENSMUSG00000058672	Tubb2a	tubulin,-beta-2A-class-IIA		yes	Hypo
Chr4	82197908	82198974	0.716689	0.00330156	0.294119	Distal-Intergenic	NA	NA	NA			Hyper
Chr2	104922708	104923785	-0.683804	0.00334172	0.295011	Intron-(uc008lkn.1/329480,-intron-5-of-6)	ENSMUSG00000074987	Wt1os	Wilms-tumor-1-homolog,-opposite-strand			Hypo
Chr6	92907242	92908288	-0.643826	0.00334266	0.295011	Intron-(uc012epf.1/330385,-intron-1-of-2)	ENSMUSG00000097462	9530026P05Rik	RIKEN-cDNA-9530026P05-gene			Hypo
Chr17	67582209	67583391	-0.613259	0.00334924	0.295011	Intron-(uc008dka.2/19274,-intron-1-of-30)	ENSMUSG00000033278	Ptprm	protein-tyrosine-phosphatase,-receptor-type,-M	yes	yes	Hypo
Chr15	72868674	72870149	-0.461935	0.00336111	0.295011	Intron-(uc007wbl.2/76510,-intron-4-of-21)	ENSMUSG00000047921	Trappc9	trafficking-protein-particle-complex-9			Hypo
Chr18	67728076	67729220	0.428274	0.00337558	0.295011	Intron-(uc008fmp.1/68166,-intron-2-of-7)	ENSMUSG00000024533	Spire1	spire-type-actin-nucleation-factor-1			Hyper
Chr8	81636069	81637154	-0.447408	0.00337665	0.295011	Intron-(uc009mih.1/622675,-intron-5-of-14)	ENSMUSG00000071064	Zfp827	zinc-finger-protein-827			Hypo
Chr7	103357013	103358228	-0.520964	0.0033911	0.295011	Promoter-(<=1kb)	ENSMUSG00000048078	Tenm4	teneurin-transmembrane-protein-4			Hypo
Chr14	54830377	54831498	-0.570633	0.00339488	0.295011	5'-UTR	ENSMUSG00000022174	Dad1	defender-against-cell-death-1		yes	Hypo
Chr18	34506794	34507812	0.489267	0.00342454	0.296395	Exon-(uc008eki.2/13476,-exon-5-of-5)	ENSMUSG00000014504	Srp19	signal-recognition-particle-19			Hyper
Chr14	26692420	26694769	0.374196	0.00343173	0.296395	Exon-(uc007sru.2/11744,-exon-5-of-11)	ENSMUSG00000095304	Plac9a	placenta-specific-9a			Hyper
Chr5	105924933	105926114	-0.53568	0.00344638	0.296755	Distal-Intergenic	NA	NA	NA			Hypo
Chr8	32498705	32499963	0.714622	0.00346421	0.297387	Distal-Intergenic	NA	NA	NA			Hyper
Chr14	26077399	26078809	-0.454682	0.0034802	0.297856	Exon-(uc007srj.1/uc007srj.1,-exon-4-of-4)	ENSMUSG00000007817	Zmiz1	zinc-finger,-MIZ-type-containing-1		yes	Hypo
Chr2	121725717	121726905	-0.514446	0.00350787	0.298735	3'-UTR	ENSMUSG00000060227	Casc4	cancer-susceptibility-candidate-4			Hypo
Chr17	7047236	7048296	0.595333	0.00351329	0.298735	Distal-Intergenic	NA	NA	NA			Hyper
Chr16	95701380	95703318	-0.459945	0.00352209	0.298735	Intron-(uc012aiw.1/13876,-intron-1-of-7)	ENSMUSG00000040732	Erg	ETS-transcription-factor			Hypo
Chr2	178517305	178518892	-0.490425	0.00354373	0.299229	Distal-Intergenic	NA	NA	NA			Hypo
Chr7	36032842	36034048	-0.505746	0.00355058	0.299229	Distal-Intergenic	NA	NA	NA			Hypo
Chr6	37488690	37489693	0.702407	0.00355961	0.299229	Intron-(uc009bjg.2/208665,-intron-3-of-8)	ENSMUSG00000038641	Akr1d1	aldo-keto-reductase-family-1,-member-D1		yes	Hyper
Chr2	6249751	6250755	0.518771	0.00358216	0.300234	Intron-(uc008igk.1/98910,-intron-1-of-14)	ENSMUSG00000039046	Usp6nl	USP6-N-terminal-like			Hyper
Chr5	111376635	111377729	-0.461462	0.00361305	0.30193	Intron-(uc008yrz.2/209683,-intron-2-of-24)	ENSMUSG00000076163	Mir701	microRNA-701			Hypo
Chr3	145410040	145411308	-0.584853	0.00366947	0.305743	Distal-Intergenic	NA	NA	NA			Hypo
Chr15	31254101	31255341	0.475588	0.00368967	0.305744	5'-UTR	ENSMUSG00000022237	Ankrd33b	ankyrin-repeat-domain-33B			Hyper
Chr11	77178268	77179544	0.612457	0.0037092	0.305744	Intron-(uc007kgl.1/237860,-intron-2-of-14)	ENSMUSG00000037926	Ssh2	slingshot-protein-phosphatase-2			Hyper
Chr11	60000816	60002059	-0.360645	0.00371421	0.305744	Exon-(uc007jfk.1/19377,-exon-3-of-6)	ENSMUSG00000020538	Srebf1	sterol-regulatory-element-binding-transcription-factor-1		yes	Hypo
Chr2	128561883	128563122	-0.490163	0.00372227	0.305744	Exon-(uc008mgt.1/17289,-exon-3-of-19)	ENSMUSG00000014361	Mertk	c-mer-proto-oncogene-tyrosine-kinase		yes	Hypo
Chr12	35884336	35885435	-0.623517	0.00372345	0.305744	Distal-Intergenic	NA	NA	NA			Hypo
Chr10	115060141	115062229	0.47075	0.00375031	0.306524	Distal-Intergenic	NA	NA	NA			Hyper
Chr9	109886538	109887969	0.650601	0.00376426	0.306524	Intron-(uc009rsy.2/17758,-intron-2-of-3)	ENSMUSG00000032479	Map4	microtubule-associated-protein-4			Hyper
Chr11	86693694	86694711	-0.71249	0.00376541	0.306524	Distal-Intergenic	NA	NA	NA			Hypo
Chr7	141802275	141803437	-0.53747	0.00379079	0.307706	Distal-Intergenic	NA	NA	NA			Hypo
Chr8	98603449	98604633	0.541229	0.00382634	0.308063	Distal-Intergenic	NA	NA	NA			Hyper
Chr8	95950680	95951924	0.472692	0.0038339	0.308063	Distal-Intergenic	NA	NA	NA			Hyper
Chr6	88075128	88076367	-0.549596	0.00384312	0.308063	Distal-Intergenic	NA	NA	NA			Hypo
Chr4	34516387	34517450	0.530921	0.00384789	0.308063	3'-UTR	ENSMUSG00000040044	Orc3	origin-recognition-complex,-subunit-3		yes	Hyper
Chr19	40903379	40905062	0.459742	0.00384956	0.308063	Promoter-(<=1kb)	ENSMUSG00000025010	Ccnj	cyclin-J			Hyper
Chr1	183774644	183776021	-0.509157	0.00387017	0.308205	Promoter-(2-3kb)	ENSMUSG00000004880	Lbr	lamin-B-receptor		yes	Hypo
Chr13	54326964	54328044	-0.584391	0.0038731	0.308205	Distal-Intergenic	NA	NA	NA			Hypo
Chr8	37599560	37600941	0.517661	0.00392766	0.308715	Distal-Intergenic	NA	NA	NA			Hyper
Chr11	85222280	85223605	-0.59344	0.00392888	0.308715	Intron-(uc007krn.2/192197,-intron-7-of-15)	ENSMUSG00000059439	Bcas3	breast-carcinoma-amplified-sequence-3			Hypo
Chr16	78099977	78101236	0.622168	0.00393251	0.308715	Distal-Intergenic	NA	NA	NA			Hyper
Chr9	77921440	77922477	0.741942	0.0039444	0.308715	Distal-Intergenic	NA	NA	NA			Hyper
Chr9	55351700	55352988	-0.58016	0.00395848	0.308715	Intron-(uc009psl.2/110842,-intron-1-of-11)	ENSMUSG00000032314	Etfa	electron-transferring-flavoprotein,-alpha-polypeptide		yes	Hypo
Chr10	110180479	110181715	0.489358	0.00395928	0.308715	Promoter-(<=1kb)	ENSMUSG00000020185	E2f7	E2F-transcription-factor-7		yes	Hyper
Chr12	45542513	45543713	0.536187	0.00396723	0.308715	Promoter-(2-3kb)	ENSMUSG00000020598	Nrcam	neuronal-cell-adhesion-molecule		yes	Hyper
Chr5	114940388	114941512	-0.779147	0.00397499	0.308715	Distal-Intergenic	NA	NA	NA			Hypo
Chr6	53449261	53451361	0.485689	0.00397759	0.308715	Intron-(uc009bzf.2/320189,-intron-4-of-5)	ENSMUSG00000053007	Creb5	cAMP-responsive-element-binding-protein-5			Hyper
Chr9	36863851	36865744	0.472238	0.00400214	0.308914	Intron-(uc009oue.1/208076,-intron-2-of-12)	ENSMUSG00000035934	Pknox2	Pbx/knotted-1-homeobox-2		yes	Hyper
Chr14	61697229	61698292	-0.624171	0.00400929	0.308914	Distal-Intergenic	NA	NA	NA			Hypo
Chr10	85597106	85598236	0.546003	0.00401286	0.308914	Exon-(uc007gnn.2/27204,-exon-7-of-14)	ENSMUSG00000001786	Fbxo7	F-box-protein-7			Hyper
Chr19	56589929	56591454	-0.51451	0.00404619	0.310025	Distal-Intergenic	NA	NA	NA			Hypo
Chr2	127376240	127377680	0.673594	0.004057	0.310025	Distal-Intergenic	NA	NA	NA			Hyper
Chr4	46648274	46649507	-0.541859	0.00406345	0.310025	Intron-(uc008suf.1/381605,-intron-3-of-12)	ENSMUSG00000039813	Tbc1d2	TBC1-domain-family,-member-2			Hypo
Chr1	64924806	64926250	0.505842	0.00407215	0.310025	Intron-(uc011wmh.1/241075,-intron-5-of-8)	ENSMUSG00000051344	Plekhm3	pleckstrin-homology-domain-containing,-family-M,-member-3			Hyper
Chr7	63407462	63408467	0.497655	0.00408201	0.310025	Exon-(uc009hdv.1/15204,-exon-39-of-93)	ENSMUSG00000030451	Herc2	HECT-and-RLD-domain-containing-E3-ubiquitin-protein-ligase-2			Hyper
Chr12	105750969	105752094	-0.677206	0.00413013	0.3116	Distal-Intergenic	NA	NA	NA			Hypo
Chr12	72157963	72159062	0.459399	0.00413187	0.3116	Intron-(uc011ynm.1/238247,-intron-10-of-14)	ENSMUSG00000048118	Arid4a	AT-rich-interactive-domain-4A-(RBP1-like)			Hyper
Chr12	17734018	17735335	-0.388744	0.00414389	0.3116	Intron-(uc007ncw.1/53602,-intron-1-of-2)	ENSMUSG00000071379	Hpcal1	hippocalcin-like-1			Hypo
Chr11	106749013	106750080	0.49691	0.00414675	0.3116	Intron-(uc007lzx.2/66313,-intron-1-of-18)	ENSMUSG00000018363	Smurf2	SMAD-specific-E3-ubiquitin-protein-ligase-2			Hyper
Chr9	58409385	58410400	-0.660939	0.00416034	0.311794	Distal-Intergenic	NA	NA	NA			Hypo
Chr18	32081142	32082612	-0.483295	0.00417465	0.312042	Distal-Intergenic	NA	NA	NA			Hypo
Chr10	79721405	79722435	-0.467374	0.00419462	0.312709	Promoter-(1-2kb)	ENSMUSG00000020150	Gamt	guanidinoacetate-methyltransferase		yes	Hypo
Chr2	165264925	165266887	-0.416506	0.00421567	0.313097	Intron-(uc008nxs.1/114644,-intron-3-of-12)	ENSMUSG00000018459	Slc13a3	solute-carrier-family-13-(sodium-dependent-dicarboxylate-transporter),-member-3		yes	Hypo
Chr12	16765896	16766954	0.584599	0.00422193	0.313097	Intron-(uc007nbz.1/268527,-intron-1-of-32)	ENSMUSG00000036523	Greb1	gene-regulated-by-estrogen-in-breast-cancer-protein			Hyper
Chr13	103026816	103028373	0.500643	0.00423415	0.313183	Distal-Intergenic	NA	NA	NA			Hyper
Chr17	34353409	34354834	-0.565124	0.00424522	0.313184	Distal-Intergenic	NA	NA	NA			Hypo
Chr3	57498048	57499101	-0.643616	0.00427473	0.314543	Promoter-(1-2kb)	ENSMUSG00000074591	Ankub1	ankrin-repeat-and-ubiquitin-domain-containing-1			Hypo
Chr4	48063731	48064811	-0.530241	0.00428968	0.314825	Promoter-(<=1kb)	ENSMUSG00000028341	Nr4a3	nuclear-receptor-subfamily-4,-group-A,-member-3		yes	Hypo
Chr5	140247031	140248107	-0.473848	0.00432742	0.3154	Promoter-(<=1kb)	ENSMUSG00000029547	Ints1	integrator-complex-subunit-1			Hypo
Chr10	9119904	9121352	-0.454033	0.00435489	0.3154	Distal-Intergenic	NA	NA	NA			Hypo
Chr13	113079065	113080110	0.624097	0.0043667	0.3154	Promoter-(<=1kb)	ENSMUSG00000049985	Ankrd55	ankyrin-repeat-domain-55			Hyper
Chr19	27048197	27049232	0.557829	0.0043799	0.3154	Distal-Intergenic	NA	NA	NA			Hyper
Chr16	15885410	15886471	-0.773106	0.00438438	0.3154	Promoter-(<=1kb)	ENSMUSG00000071637	Cebpd	CCAAT/enhancer-binding-protein-(C/EBP),-delta			Hypo
Chr5	114549121	114550178	-0.598034	0.00438991	0.3154	Promoter-(<=1kb)	ENSMUSG00000029592	Usp30	ubiquitin-specific-peptidase-30			Hypo
Chr6	97099814	97100957	-0.574054	0.00439016	0.3154	Promoter-(<=1kb)	ENSMUSG00000035245	Eogt	EGF-domain-specific-O-linked-N-acetylglucosamine-(GlcNAc)-transferase			Hypo
Chr10	125685124	125686170	-0.756475	0.00439269	0.3154	Distal-Intergenic	NA	NA	NA			Hypo
Chr17	73553015	73554021	0.586467	0.00439771	0.3154	Intron-(uc008dnh.2/225010,-intron-5-of-5)	ENSMUSG00000054469	Lclat1	lysocardiolipin-acyltransferase-1			Hyper
Chr8	108226343	108227457	-0.594448	0.00444603	0.317575	Promoter-(<=1kb)	ENSMUSG00000005699	Pard6a	par-6-family-cell-polarity-regulator-alpha			Hypo
Chr16	18208096	18209709	0.532562	0.00445689	0.317575	Exon-(uc012aca.1/66779,-exon-3-of-3)	ENSMUSG00000116557	4933432I09Rik	RIKEN-cDNA-4933432I09-gene			Hyper
Chr17	45475936	45477189	-0.440088	0.00446384	0.317575	Distal-Intergenic	NA	NA	NA			Hypo
Chr3	10309766	10311311	-0.448974	0.00451669	0.317575	Downstream-(2-3kb)	ENSMUSG00000027530	Fabp12	fatty-acid-binding-protein-12		yes	Hypo
Chr1	181051337	181052749	0.459894	0.00453026	0.317575	Intron-(uc007dvj.1/69726,-intron-5-of-11)	ENSMUSG00000055067	Smyd3	SET-and-MYND-domain-containing-3			Hyper
Chr6	5679813	5681144	0.523635	0.00453977	0.317575	Intron-(uc009awl.2/13426,-intron-1-of-16)	ENSMUSG00000029757	Dync1i1	dynein-cytoplasmic-1-intermediate-chain-1			Hyper
Chr5	34919254	34920862	0.39377	0.00454015	0.317575	Promoter-(2-3kb)	ENSMUSG00000029106	Add1	adducin-1-(alpha)			Hyper
Chr11	103620406	103621467	-0.612941	0.0045513	0.317575	Distal-Intergenic	NA	NA	NA			Hypo
Chr9	60018722	60019917	0.520627	0.00457884	0.317575	Intron-(uc009pyy.2/207596,-intron-7-of-17)	ENSMUSG00000032289	Thsd4	thrombospondin,-type-I,-domain-containing-4			Hyper
Chr3	138144538	138146135	0.443194	0.0046029	0.317575	Exon-(uc008rnl.1/75624,-exon-2-of-11)	ENSMUSG00000005813	Metap1	methionyl-aminopeptidase-1			Hyper
Chr13	110228178	110230423	0.401699	0.00461536	0.317575	Intron-(uc007rvg.2/238871,-intron-3-of-16)	ENSMUSG00000076946	Mir582	microRNA-582			Hyper
Chr11	43171692	43172743	-0.519557	0.00461583	0.317575	Distal-Intergenic	NA	NA	NA			Hypo
Chr1	22257299	22258515	0.510543	0.00461704	0.317575	Distal-Intergenic	NA	NA	NA			Hyper
Chr2	29898491	29900204	-0.479214	0.00462202	0.317575	Intron-(uc008jau.1/71820,-intron-1-of-8)	ENSMUSG00000039715	Wdr34	WD-repeat-domain-34			Hypo
Chr4	53023763	53024771	0.594599	0.00463586	0.317575	Promoter-(<=1kb)	ENSMUSG00000015247	Nipsnap3b	nipsnap-homolog-3B			Hyper
Chr9	48686804	48687850	-0.598121	0.00464112	0.317575	Distal-Intergenic	NA	NA	NA			Hypo
Chr5	38833845	38834902	-0.518574	0.00464227	0.317575	Intron-(uc008xgo.1/117591,-intron-3-of-11)	ENSMUSG00000005107	Slc2a9	solute-carrier-family-2-(facilitated-glucose-transporter),-member-9			Hypo
Chr11	49518045	49519424	0.545805	0.00466596	0.317575	Promoter-(1-2kb)	ENSMUSG00000020362	Cnot6	CCR4-NOT-transcription-complex,-subunit-6			Hyper
Chr19	46324375	46325397	0.558293	0.00468036	0.317575	Intron-(uc008hsm.1/107338,-intron-4-of-7)	ENSMUSG00000025224	Gbf1	golgi-specific-brefeldin-A-resistance-factor-1			Hyper
Chr15	91294360	91295655	0.40984	0.00468557	0.317575	Intron-(uc007xhy.2/239606,-intron-3-of-9)	ENSMUSG00000036298	Slc2a13	solute-carrier-family-2-(facilitated-glucose-transporter),-member-13			Hyper
Chr16	72361987	72363347	-0.585708	0.00470896	0.317575	Distal-Intergenic	NA	NA	NA			Hypo
Chr3	102870701	102871727	0.519408	0.00471191	0.317575	3'-UTR	ENSMUSG00000070385	Ampd1	adenosine-monophosphate-deaminase-1			Hyper
Chr3	69099572	69100796	-0.549802	0.00471387	0.317575	Distal-Intergenic	NA	NA	NA			Hypo
Chr14	25226167	25227315	-0.605626	0.00471785	0.317575	Distal-Intergenic	NA	NA	NA			Hypo
Chr19	41580643	41581743	0.476104	0.00472192	0.317575	Intron-(uc008hlx.1/212391,-intron-2-of-6)	ENSMUSG00000025019	Lcor	ligand-dependent-nuclear-receptor-corepressor			Hyper
Chr4	138387898	138388918	0.530376	0.00473101	0.317575	Promoter-(<=1kb)	ENSMUSG00000058908	Pla2g2a	phospholipase-A2,-group-IIA-(platelets,-synovial-fluid)		yes	Hyper
Chr16	81266647	81267657	0.591196	0.00474954	0.317575	Intron-(uc007zta.2/17968,-intron-1-of-15)	ENSMUSG00000022762	Ncam2	neural-cell-adhesion-molecule-2			Hyper
Chr10	49423870	49425282	0.656893	0.00476599	0.317575	Intron-(uc007fag.2/14806,-intron-2-of-17)	ENSMUSG00000056073	Grik2	glutamate-receptor,-ionotropic,-kainate-2-(beta-2)		yes	Hyper
Chr10	41213649	41214973	-0.606788	0.00477875	0.317575	Exon-(uc007exu.2/73075,-exon-2-of-8)	ENSMUSG00000078451	Ppil6	peptidylprolyl-isomerase-(cyclophilin)-like-6			Hypo
Chr9	75292735	75294086	0.481199	0.00481591	0.317575	Exon-(uc009qsh.1/235497,-exon-2-of-12)	ENSMUSG00000042487	Leo1	Leo1,-Paf1/RNA-polymerase-II-complex-component	yes		Hyper
Chr9	61430776	61432319	0.405064	0.00483181	0.317575	Distal-Intergenic	NA	NA	NA			Hyper
Chr2	179804164	179805216	-0.758712	0.00483209	0.317575	Promoter-(<=1kb)	ENSMUSG00000039069	Mtg2	mitochondrial-ribosome-associated-GTPase-2			Hypo
Chr16	18774525	18775579	-0.579689	0.00485656	0.317575	Promoter-(1-2kb)	ENSMUSG00000041378	Cldn5	claudin-5		yes	Hypo
Chr19	48701529	48702549	-0.570944	0.0048682	0.317575	Intron-(uc008hvx.1/66673,-intron-5-of-26)	ENSMUSG00000063434	Sorcs3	sortilin-related-VPS10-domain-containing-receptor-3			Hypo
Chr10	34003964	34004975	0.669343	0.0048912	0.317575	Promoter-(1-2kb)	ENSMUSG00000047514	Tspyl1	testis-specific-protein,-Y-encoded-like-1			Hyper
Chr1	157903975	157905072	0.488296	0.00490057	0.317575	Intron-(uc007dbx.2/240832,-intron-3-of-6)	ENSMUSG00000050565	Tor1aip2	torsin-A-interacting-protein-2			Hyper
Chr18	14228505	14229535	0.747641	0.00492199	0.317575	Distal-Intergenic	NA	NA	NA			Hyper
Chr12	112373500	112374814	-0.60518	0.00492215	0.317575	Distal-Intergenic	NA	NA	NA			Hypo
Chr11	56940183	56941287	0.567381	0.00494076	0.317575	Intron-(uc007izr.2/14799,-intron-2-of-15)	ENSMUSG00000020524	Gria1	glutamate-receptor,-ionotropic,-AMPA1-(alpha-1)		yes	Hyper
Chr2	14863819	14864912	-0.617604	0.00494235	0.317575	Intron-(uc008ikm.1/12296,-intron-3-of-13)	ENSMUSG00000057914	Cacnb2	calcium-channel,-voltage-dependent,-beta-2-subunit		yes	Hypo
Chr6	82367267	82368342	0.699238	0.00494915	0.317575	Intron-(uc009clh.2/21336,-intron-2-of-5)	ENSMUSG00000030043	Tacr1	tachykinin-receptor-1		yes	Hyper
Chr3	65429927	65431127	0.485085	0.00495478	0.317575	Distal-Intergenic	NA	NA	NA			Hyper
Chr11	46220278	46221461	0.530109	0.00496087	0.317575	Promoter-(2-3kb)	ENSMUSG00000020401	Fam71b	family-with-sequence-similarity-71,-member-B			Hyper
Chr4	65822159	65823178	0.742834	0.00496894	0.317575	Intron-(uc008thn.1/56079,-intron-3-of-22)	ENSMUSG00000028373	Astn2	astrotactin-2		yes	Hyper
Chr16	37824675	37826501	0.521984	0.00497902	0.317575	Intron-(uc007zej.1/14314,-intron-6-of-10)	ENSMUSG00000034158	Lrrc58	leucine-rich-repeat-containing-58			Hyper
Chr14	78364907	78365956	0.616014	0.00498625	0.317575	Intron-(uc007use.2/108670,-intron-7-of-11)	ENSMUSG00000022014	Epsti1	epithelial-stromal-interaction-1-(breast)			Hyper
Chr18	66070328	66071866	-0.567709	0.00500767	0.317575	Distal-Intergenic	NA	NA	NA			Hypo
Chr5	141364587	141366398	-0.375106	0.0050089	0.317575	Promoter-(<=1kb)	ENSMUSG00000036526	Card11	caspase-recruitment-domain-family,-member-11		yes	Hypo
Chr12	78337900	78339015	0.681848	0.00501624	0.317575	Promoter-(<=1kb)	ENSMUSG00000021065	Fut8	fucosyltransferase-8			Hyper
Chr7	35715975	35717467	-0.398445	0.00501707	0.317575	Intron-(uc009gjj.2/18624,-intron-3-of-14)	ENSMUSG00000063931	Pepd	peptidase-D		yes	Hypo
Chr19	57513220	57514255	-0.512274	0.00501711	0.317575	Distal-Intergenic	NA	NA	NA			Hypo
Chr3	84075261	84076354	0.44258	0.00501822	0.317575	Promoter-(<=1kb)	ENSMUSG00000027993	Trim2	tripartite-motif-containing-2		yes	Hyper
Chr2	162440394	162441719	0.433748	0.00503342	0.317575	Intron-(uc008nrw.1/19281,-intron-1-of-29)	ENSMUSG00000053141	Ptprt	protein-tyrosine-phosphatase,-receptor-type,-T			Hyper
Chr17	45669646	45671003	0.498112	0.00505188	0.317575	5'-UTR	ENSMUSG00000023949	Tcte1	t-complex-associated-testis-expressed-1			Hyper
Chr8	73311221	73313483	-0.324531	0.00506225	0.317575	Promoter-(2-3kb)	ENSMUSG00000031833	Mast3	microtubule-associated-serine/threonine-kinase-3			Hypo
Chr17	11033711	11034758	0.817123	0.00506307	0.317575	Promoter-(<=1kb)	ENSMUSG00000023826	Prkn	parkin-RBR-E3-ubiquitin-protein-ligase			Hyper
Chr6	127554570	127556194	-0.502674	0.0050764	0.317575	Intron-(uc009dwa.1/381812,-intron-2-of-6)	ENSMUSG00000061414	Cracr2a	calcium-release-activated-channel-regulator-2A			Hypo
Chr15	27932856	27933862	0.511936	0.00507833	0.317575	Intron-(uc007vjw.1/223435,-intron-1-of-56)	ENSMUSG00000022263	Trio	triple-functional-domain-(PTPRF-interacting)	yes	yes	Hyper
Chr18	50330255	50331450	-0.593314	0.00509288	0.317575	Exon-(uc008eww.1/15488,-exon-15-of-24)	ENSMUSG00000024507	Hsd17b4	hydroxysteroid-(17-beta)-dehydrogenase-4		yes	Hypo
Chr18	82838620	82839812	-0.51046	0.00514755	0.317575	Intron-(uc008fub.2/329002,-intron-5-of-29)	ENSMUSG00000041258	Zfp236	zinc-finger-protein-236			Hypo
Chr11	96723469	96724740	0.516771	0.00516665	0.317575	Distal-Intergenic	NA	NA	NA			Hyper
Chr9	73817913	73819412	0.490247	0.00518517	0.317575	Distal-Intergenic	NA	NA	NA			Hyper
Chr6	145389415	145390659	-0.486229	0.00518912	0.317575	Intron-(uc009erk.1/74071,-intron-2-of-10)	ENSMUSG00000054966	Lmntd1	lamin-tail-domain-containing-1			Hypo
Chr1	90949308	90950309	0.517904	0.00519173	0.317575	Distal-Intergenic	NA	NA	NA			Hyper
Chr10	115493612	115494920	-0.621593	0.0051935	0.317575	Intron-(uc007hbp.2/19279,-intron-2-of-13)	ENSMUSG00000020151	Ptprr	protein-tyrosine-phosphatase,-receptor-type,-R		yes	Hypo
Chr11	82624794	82627084	-0.345149	0.00519356	0.317575	Exon-(uc007knh.2/67338,-exon-3-of-6)	ENSMUSG00000020696	Rffl	ring-finger-and-FYVE-like-domain-containing-protein			Hypo
Chr10	80160214	80161393	-0.379324	0.00519356	0.317575	Intron-(uc007geh.1/208228,-intron-1-of-3)	ENSMUSG00000003348	Mob3a	MOB-kinase-activator-3A			Hypo
Chr13	75923203	75924305	-0.614847	0.00524564	0.317575	Distal-Intergenic	NA	NA	NA			Hypo
Chr11	113559294	113560338	-0.426323	0.00524688	0.317575	3'-UTR	ENSMUSG00000018727	Cpsf4l	cleavage-and-polyadenylation-specific-factor-4-like			Hypo
Chr2	130510011	130511405	-0.436012	0.00527539	0.317575	3'-UTR	ENSMUSG00000074796	Slc4a11	solute-carrier-family-4,-sodium-bicarbonate-transporter-like,-member-11			Hypo
Chr13	47129327	47130624	-0.524357	0.0053111	0.317575	Exon-(uc007qhq.2/22017,-exon-5-of-9)	ENSMUSG00000021376	Tpmt	thiopurine-methyltransferase		yes	Hypo
Chr6	48768538	48769714	0.413464	0.00532652	0.317575	Distal-Intergenic	NA	NA	NA			Hyper
Chr16	66996476	66997927	0.598761	0.00532657	0.317575	Intron-(uc007zqn.2/239857,-intron-1-of-9)	ENSMUSG00000064115	Cadm2	cell-adhesion-molecule-2			Hyper
Chr9	9915782	9916809	0.675774	0.00532877	0.317575	Intron-(uc009odr.2/244682,-intron-9-of-20)	ENSMUSG00000050730	Arhgap42	Rho-GTPase-activating-protein-42			Hyper
Chr5	67089627	67091164	-0.509814	0.0053336	0.317575	Distal-Intergenic	NA	NA	NA			Hypo
Chr9	107809099	107810910	-0.38688	0.00534763	0.317575	Promoter-(<=1kb)	ENSMUSG00000032584	Mst1r	macrophage-stimulating-1-receptor-(c-met-related-tyrosine-kinase)		yes	Hypo
Chr11	113570002	113571244	-0.380269	0.00534921	0.317575	Promoter-(<=1kb)	ENSMUSG00000018727	Cpsf4l	cleavage-and-polyadenylation-specific-factor-4-like			Hypo
Chr5	27387029	27388062	-0.59727	0.0053559	0.317575	Intron-(uc008wtj.1/13483,-intron-1-of-3)	ENSMUSG00000061576	Dpp6	dipeptidylpeptidase-6	yes		Hypo
Chr5	66223132	66224225	0.501093	0.00536147	0.317575	Distal-Intergenic	NA	NA	NA			Hyper
Chr6	72470456	72471470	-0.638245	0.0053715	0.317575	5'-UTR	ENSMUSG00000056737	Capg	capping-protein-(actin-filament),-gelsolin-like		yes	Hypo
Chr14	103873009	103874196	0.501785	0.00537369	0.317575	Intron-(uc007uwp.1/uc007uwp.1,-intron-2-of-3)	ENSMUSG00000022123	Scel	sciellin		yes	Hyper
Chr9	75166095	75167340	0.465498	0.00537631	0.317575	Intron-(uc009qry.1/14697,-intron-3-of-12)	ENSMUSG00000032192	Gnb5	guanine-nucleotide-binding-protein-(G-protein),-beta-5		yes	Hyper
Chr5	81658773	81660750	0.502934	0.00537954	0.317575	Intron-(uc008xwi.1/319387,-intron-3-of-5)	ENSMUSG00000037605	Adgrl3	adhesion-G-protein-coupled-receptor-L3			Hyper
Chr6	91737972	91739009	0.530474	0.00538119	0.317575	Exon-(uc012epd.1/243547,-exon-2-of-24)	ENSMUSG00000030098	Grip2	glutamate-receptor-interacting-protein-2			Hyper
Chr2	151724003	151725310	-0.639353	0.00539443	0.317575	Distal-Intergenic	NA	NA	NA			Hypo
Chr13	117815163	117816855	0.393007	0.00539627	0.317575	Promoter-(<=1kb)	ENSMUSG00000021725	Parp8	poly-(ADP-ribose)-polymerase-family,-member-8			Hyper
Chr8	29273951	29274952	0.668677	0.00542091	0.317575	Distal-Intergenic	NA	NA	NA			Hyper
Chr15	97930084	97931090	-0.682372	0.00542151	0.317575	Intron-(uc011zyq.1/18642,-intron-1-of-22)	ENSMUSG00000033075	Senp1	SUMO1/sentrin-specific-peptidase-1		yes	Hypo
Chr12	110088201	110089667	-0.461619	0.0054304	0.317575	Promoter-(<=1kb)	ENSMUSG00000048856	Slc25a47	solute-carrier-family-25,-member-47			Hypo
Chr9	113665057	113666292	0.635624	0.00543697	0.317575	Intron-(uc009rwq.1/76499,-intron-1-of-10)	ENSMUSG00000033392	Clasp2	CLIP-associating-protein-2		yes	Hyper
Chr3	53319212	53320272	-0.564749	0.00545138	0.317762	3'-UTR	ENSMUSG00000037016	Frem2	Fras1-related-extracellular-matrix-protein-2			Hypo
Chr11	35688777	35689944	-0.456803	0.00546564	0.317938	Exon-(uc007ili.1/211652,-exon-11-of-23)	ENSMUSG00000018848	Rars	arginyl-tRNA-synthetase		yes	Hypo
Chr10	12583417	12584427	0.507402	0.00551057	0.319895	Promoter-(1-2kb)	ENSMUSG00000019820	Utrn	utrophin		yes	Hyper
Chr10	16678874	16679946	0.738541	0.0055525	0.32167	Exon-(uc007els.1/uc007els.1,-exon-6-of-9)	ENSMUSG00000039910	Cited2	Cbp/p300-interacting-transactivator,-with-Glu/Asp-rich-carboxy-terminal-domain,-2		yes	Hyper
Chr1	135086579	135087760	-0.477703	0.00558327	0.322793	Distal-Intergenic	NA	NA	NA			Hypo
Chr17	7012023	7013251	-0.43993	0.00560373	0.322839	Intron-(uc008ahw.1/uc008ahw.1,-intron-1-of-1)	ENSMUSG00000052397	Ezr	ezrin		yes	Hypo
Chr16	33769584	33770681	-0.541515	0.00560687	0.322839	Exon-(uc007zak.1/uc007zak.1,-exon-3-of-3)	ENSMUSG00000075254	Heg1	heart-development-protein-with-EGF-like-domains-1			Hypo
Chr10	104664454	104665486	0.696509	0.00562152	0.323026	Intron-(uc007gym.1/278279,-intron-11-of-11)	ENSMUSG00000036019	Tmtc2	transmembrane-and-tetratricopeptide-repeat-containing-2			Hyper
Chr1	37198911	37200191	0.427167	0.0056624	0.324717	Distal-Intergenic	NA	NA	NA			Hyper
Chr8	128844534	128846293	0.456394	0.00567808	0.324959	Exon-(uc009nyt.1/210027,-exon-2-of-7)	ENSMUSG00000057060	Slc35f3	solute-carrier-family-35,-member-F3			Hyper
Chr14	103277973	103279091	0.573136	0.00570206	0.32533	Distal-Intergenic	NA	NA	NA			Hyper
Chr18	5765786	5767737	0.415066	0.00570755	0.32533	Exon-(uc008dyy.1/21417,-exon-6-of-8)	ENSMUSG00000024238	Zeb1	zinc-finger-E-box-binding-homeobox-1		yes	Hyper
Chr11	63417047	63419159	0.444766	0.00576527	0.326939	Distal-Intergenic	NA	NA	NA			Hyper
Chr3	39572715	39574581	0.374667	0.00577947	0.326939	Distal-Intergenic	NA	NA	NA			Hyper
Chr3	65469143	65470173	0.56699	0.00577992	0.326939	Promoter-(<=1kb)	ENSMUSG00000074579	Lekr1	leucine,-glutamate-and-lysine-rich-1			Hyper
Chr10	62694530	62695577	0.556227	0.00578488	0.326939	Distal-Intergenic	NA	NA	NA			Hyper
Chr7	136535064	136536374	0.458605	0.00580237	0.326939	Distal-Intergenic	NA	NA	NA			Hyper
Chr7	123561938	123563191	0.530847	0.00580502	0.326939	5'-UTR	ENSMUSG00000030660	Pik3c2a	phosphatidylinositol-4-phosphate-3-kinase-catalytic-subunit-type-2-alpha			Hyper
Chr2	29991731	29993212	0.422074	0.00581924	0.32709	Promoter-(2-3kb)	ENSMUSG00000039678	Tbc1d13	TBC1-domain-family,-member-13			Hyper
Chr13	73152355	73153461	0.586398	0.00584079	0.327651	Distal-Intergenic	NA	NA	NA			Hyper
Chr18	39800296	39801590	-0.590124	0.00585789	0.327694	Distal-Intergenic	NA	NA	NA			Hypo
Chr3	157358026	157359165	-0.680477	0.00586469	0.327694	Distal-Intergenic	NA	NA	NA			Hypo
Chr2	104539490	104540628	0.456485	0.00590496	0.329294	5'-UTR	ENSMUSG00000027175	Tcp11l1	t-complex-11-like-1			Hyper
Chr17	63569859	63571261	0.471692	0.00593603	0.330011	Intron-(uc008dfj.2/50758,-intron-4-of-5)	ENSMUSG00000023965	Fbxl17	F-box-and-leucine-rich-repeat-protein-17			Hyper
Chr19	21721498	21722697	0.466703	0.00594159	0.330011	Intron-(uc008gyz.1/66206,-intron-1-of-3)	ENSMUSG00000035171	1110059E24Rik	RIKEN-cDNA-1110059E24-gene			Hyper
Chr12	45375791	45377006	0.482941	0.00595276	0.330011	Intron-(uc007nlp.1/67452,-intron-4-of-12)	ENSMUSG00000036257	Pnpla8	patatin-like-phospholipase-domain-containing-8		yes	Hyper
Chr5	108401147	108402471	0.450533	0.00597509	0.330527	Intron-(uc008yni.2/67266,-intron-1-of-4)	ENSMUSG00000029270	Fam69a	family-with-sequence-similarity-69,-member-A		yes	Hyper
Chr2	17585765	17586973	-0.651273	0.00600324	0.330527	Intron-(uc008ila.1/74103,-intron-2-of-6)	ENSMUSG00000053702	Nebl	nebulette		yes	Hypo
Chr1	127282431	127283637	-0.549574	0.00601219	0.330527	Distal-Intergenic	NA	NA	NA			Hypo
Chr6	113301395	113303195	-0.480873	0.0060143	0.330527	Distal-Intergenic	NA	NA	NA			Hypo
Chr5	125072582	125073772	-0.632315	0.00602571	0.330527	Exon-(uc008zqh.2/67978,-exon-14-of-18)	ENSMUSG00000038023	Atp6v0a2	ATPase,-H+-transporting,-lysosomal-V0-subunit-A2			Hypo
Chr12	76684831	76685928	0.449031	0.00604192	0.330527	Intron-(uc007nxe.1/26932,-intron-2-of-13)	ENSMUSG00000021051	Ppp2r5e	protein-phosphatase-2,-regulatory-subunit-B',-epsilon			Hyper
Chr4	147522876	147524271	-0.381472	0.00606225	0.330527	Promoter-(1-2kb)	ENSMUSG00000055401	Fbxo6	F-box-protein-6		yes	Hypo
Chr16	32164119	32165544	0.453672	0.00611071	0.330527	Promoter-(<=1kb)	ENSMUSG00000052384	Nrros	negative-regulator-of-reactive-oxygen-species			Hyper
Chr12	4449101	4451127	0.360385	0.00612508	0.330527	Intron-(uc007mxs.2/17977,-intron-1-of-22)	ENSMUSG00000020647	Ncoa1	nuclear-receptor-coactivator-1			Hyper
Chr8	126899737	126900742	-0.442507	0.00612657	0.330527	Exon-(uc009nxb.1/209966,-exon-4-of-7)	ENSMUSG00000050751	Pgbd5	piggyBac-transposable-element-derived-5			Hypo
Chr17	43007617	43008883	0.552635	0.00613323	0.330527	Intron-(uc008cot.1/12488,-intron-1-of-17)	ENSMUSG00000061665	Cd2ap	CD2-associated-protein			Hyper
Chr6	119464086	119465441	-0.587951	0.00614928	0.330527	Intron-(uc009dmi.2/22419,-intron-1-of-4)	ENSMUSG00000030170	Wnt5b	wingless-type-MMTV-integration-site-family,-member-5B			Hypo
Chr17	33658526	33660442	0.381383	0.00615821	0.330527	Promoter-(<=1kb)	ENSMUSG00000024299	Adamts10	a-disintegrin-like-and-metallopeptidase-(reprolysin-type)-with-thrombospondin-type-1-motif,-10			Hyper
Chr12	88230091	88231957	0.374246	0.00616609	0.330527	Distal-Intergenic	NA	NA	NA			Hyper
Chr12	8919302	8920382	0.553061	0.0061762	0.330527	Distal-Intergenic	NA	NA	NA			Hyper
Chr7	35403288	35404510	-0.483927	0.00617654	0.330527	Distal-Intergenic	NA	NA	NA			Hypo
Chr19	32849103	32850951	0.365596	0.00617785	0.330527	Exon-(uc008hfq.1/19211,-exon-2-of-5)	ENSMUSG00000013663	Pten	phosphatase-and-tensin-homolog	yes	yes	Hyper
Chr17	35663157	35664196	-0.463305	0.00618944	0.330527	Exon-(uc008chx.2/240084,-exon-10-of-19)	ENSMUSG00000024409	Psors1c2	psoriasis-susceptibility-1-candidate-2-(human)			Hypo
Chr17	90690112	90691114	0.612506	0.00619902	0.330527	Intron-(uc008dwa.2/18189,-intron-12-of-16)	ENSMUSG00000024109	Nrxn1	neurexin-I	yes	yes	Hyper
Chr11	70370354	70371831	0.440856	0.00622048	0.330527	3'-UTR	ENSMUSG00000020827	Mink1	misshapen-like-kinase-1-(zebrafish)		yes	Hyper
Chr18	9865916	9866917	-0.646559	0.00623282	0.330527	Exon-(uc008eak.2/140792,-exon-8-of-10)	ENSMUSG00000024287	Thoc1	THO-complex-1			Hypo
Chr18	5426502	5427651	0.5033	0.00624712	0.330527	Distal-Intergenic	NA	NA	NA			Hyper
Chr13	94144020	94145066	0.547289	0.00625843	0.330527	Intron-(uc007rlc.2/26556,-intron-5-of-9)	ENSMUSG00000007617	Homer1	homer-scaffolding-protein-1		yes	Hyper
Chr14	119635015	119636037	0.529478	0.00626495	0.330527	Intron-(uc007uzn.2/50787,-intron-1-of-1)	ENSMUSG00000053465	Hs6st3	heparan-sulfate-6-O-sulfotransferase-3		yes	Hyper
Chr5	130356034	130357981	0.415608	0.00627197	0.330527	Promoter-(1-2kb)	ENSMUSG00000025537	Phkg1	phosphorylase-kinase-gamma-1			Hyper
Chr12	117728084	117729212	0.927187	0.00627725	0.330527	Intron-(uc007phv.2/19276,-intron-1-of-3)	ENSMUSG00000056553	Ptprn2	protein-tyrosine-phosphatase,-receptor-type,-N-polypeptide-2		yes	Hyper
Chr11	62000114	62002188	0.373763	0.00629113	0.330527	Intron-(uc007jin.1/432572,-intron-10-of-12)	ENSMUSG00000018500	Adora2b	adenosine-A2b-receptor		yes	Hyper
Chr2	101364646	101366000	0.583914	0.00631156	0.330527	Distal-Intergenic	NA	NA	NA			Hyper
Chr2	101401806	101403216	0.52733	0.00633246	0.330527	3'-UTR	ENSMUSG00000027165	B230118H07Rik	RIKEN-cDNA-B230118H07-gene			Hyper
Chr17	26118555	26120020	0.40951	0.00633896	0.330527	Promoter-(2-3kb)	ENSMUSG00000037326	Capn15	calpain-15			Hyper
Chr3	137035327	137036461	0.631981	0.00634877	0.330527	Exon-(uc008rmj.2/59308,-exon-2-of-7)	ENSMUSG00000054690	Emcn	endomucin			Hyper
Chr10	69284570	69285696	0.413326	0.00634966	0.330527	3'-UTR	ENSMUSG00000069601	Ank3	ankyrin-3,-epithelial		yes	Hyper
Chr7	73243731	73245005	-0.489163	0.00635115	0.330527	Distal-Intergenic	NA	NA	NA			Hypo
Chr16	85000218	85001302	0.512451	0.00637035	0.330527	Intron-(uc007ztm.2/11820,-intron-12-of-15)	ENSMUSG00000008976	Gabpa	GA-repeat-binding-protein,-alpha		yes	Hyper
Chr19	43910683	43911701	-0.498921	0.00637798	0.330527	Promoter-(1-2kb)	ENSMUSG00000025194	Gm10768	predicted-gene-10768			Hypo
Chr16	34976442	34977472	-0.49081	0.00638288	0.330527	Exon-(uc007zbd.1/107589,-exon-26-of-32)	ENSMUSG00000022836	Mylk	myosin,-light-polypeptide-kinase		yes	Hypo
Chr14	101750115	101751147	0.636137	0.00640332	0.330527	Distal-Intergenic	NA	NA	NA			Hyper
Chr7	81650510	81651528	0.635325	0.00640691	0.330527	Intron-(uc009hwf.1/108116,-intron-1-of-10)	ENSMUSG00000025790	Slco3a1	solute-carrier-organic-anion-transporter-family,-member-3a1		yes	Hyper
Chr5	4962136	4963470	0.466666	0.0064171	0.330527	Intron-(uc008wih.2/18647,-intron-9-of-13)	ENSMUSG00000044674	Fzd1	frizzled-class-receptor-1			Hyper
Chr4	32974888	32976570	-0.368919	0.0064399	0.3311	Intron-(uc008sfh.1/140577,-intron-1-of-16)	ENSMUSG00000040183	Ankrd6	ankyrin-repeat-domain-6			Hypo
Chr8	13437982	13439094	-0.686514	0.00646263	0.331666	Promoter-(2-3kb)	ENSMUSG00000038457	Tmem255b	transmembrane-protein-255B			Hypo
Chr1	163059753	163061102	0.554758	0.00650877	0.333119	Promoter-(<=1kb)	ENSMUSG00000026705	Klhl20	kelch-like-20			Hyper
Chr14	67618754	67620083	0.477589	0.00654691	0.333119	Intron-(uc007uks.2/12177,-intron-1-of-5)	ENSMUSG00000022051	Bnip3l	BCL2/adenovirus-E1B-interacting-protein-3-like		yes	Hyper
Chr15	83970610	83971769	-0.466967	0.00655335	0.333119	Distal-Intergenic	NA	NA	NA			Hypo
Chr8	81746924	81748798	0.378515	0.00656256	0.333119	Intron-(uc009mil.2/67687,-intron-2-of-5)	ENSMUSG00000031682	1700011L22Rik	RIKEN-cDNA-1700011L22-gene			Hyper
Chr5	149738108	149739155	0.540623	0.00656927	0.333119	Promoter-(1-2kb)	ENSMUSG00000041298	Katnal1	katanin-p60-subunit-A-like-1			Hyper
Chr8	93365099	93366189	0.512971	0.00658285	0.333119	Intron-(uc009mse.2/109151,-intron-1-of-2)	ENSMUSG00000056608	Chd9	chromodomain-helicase-DNA-binding-protein-9			Hyper
Chr11	78664022	78665050	-0.520876	0.00658462	0.333119	Distal-Intergenic	NA	NA	NA			Hypo
Chr4	85484227	85485328	0.515936	0.00658501	0.333119	Distal-Intergenic	NA	NA	NA			Hyper
Chr9	57908240	57909567	0.449899	0.00662775	0.334316	Promoter-(2-3kb)	ENSMUSG00000032327	Stra6	stimulated-by-retinoic-acid-gene-6			Hyper
Chr2	69000019	69001424	-0.550619	0.00663226	0.334316	Intron-(uc008jxt.2/329416,-intron-7-of-15)	ENSMUSG00000034738	Nostrin	nitric-oxide-synthase-trafficker			Hypo
Chr14	48409546	48410560	-0.557239	0.00667877	0.335867	Distal-Intergenic	NA	NA	NA			Hypo
Chr10	59614276	59615364	-0.47523	0.00668674	0.335867	Distal-Intergenic	NA	NA	NA			Hypo
Chr18	10607378	10608535	0.509477	0.00671119	0.336498	Promoter-(1-2kb)	ENSMUSG00000024293	Esco1	establishment-of-sister-chromatid-cohesion-N-acetyltransferase-1			Hyper
Chr19	23305000	23306503	0.468694	0.00672668	0.336679	Exon-(uc008haa.1/226026,-exon-14-of-24)	ENSMUSG00000024943	Smc5	structural-maintenance-of-chromosomes-5			Hyper
Chr17	12435842	12437248	-0.472332	0.0067507	0.337285	Exon-(uc008akn.1/26407,-exon-16-of-27)	ENSMUSG00000014426	Map3k4	mitogen-activated-protein-kinase-kinase-kinase-4		yes	Hypo
Chr1	138786793	138788051	0.449816	0.00679184	0.338539	Exon-(uc007cva.2/26424,-exon-5-of-7)	ENSMUSG00000026398	Nr5a2	nuclear-receptor-subfamily-5,-group-A,-member-2		yes	Hyper
Chr6	90610367	90611800	-0.342237	0.00680457	0.338539	3'-UTR	ENSMUSG00000030089	Slc41a3	solute-carrier-family-41,-member-3			Hypo
Chr3	8767729	8768733	0.612464	0.00681166	0.338539	Distal-Intergenic	NA	NA	NA			Hyper
Chr5	118828781	118830152	-0.436205	0.00682787	0.338751	Distal-Intergenic	NA	NA	NA			Hypo
Chr1	82601556	82602611	0.545576	0.0068474	0.338837	Intron-(uc007bru.1/12828,-intron-1-of-1)	ENSMUSG00000079465	Col4a3	collagen,-type-IV,-alpha-3			Hyper
Chr4	126703399	126704495	0.479775	0.00685353	0.338837	Exon-(uc008utz.2/71514,-exon-6-of-10)	ENSMUSG00000028820	Sfpq	splicing-factor-proline/glutamine-rich-(polypyrimidine-tract-binding-protein-associated)		yes	Hyper
Chr1	132837389	132838422	0.501764	0.00687744	0.339427	Promoter-(<=1kb)	ENSMUSG00000016524	Il19	interleukin-19		yes	Hyper
Chr7	119346414	119347449	0.595373	0.00691605	0.3407	Distal-Intergenic	NA	NA	NA			Hyper
Chr6	122219943	122220955	0.609942	0.00692729	0.3407	3'-UTR	ENSMUSG00000030114	Klrg1	killer-cell-lectin-like-receptor-subfamily-G,-member-1		yes	Hyper
Chr4	125381151	125382442	-0.486781	0.00694962	0.341206	Exon-(uc008usa.2/14807,-exon-14-of-16)	NA	Ftl2-ps	ferritin-light-polypeptide-2,-pseudogene			Hypo
Chr9	30388810	30389812	0.569414	0.00696965	0.341597	Distal-Intergenic	NA	NA	NA			Hyper
Chr1	135983076	135984366	-0.504142	0.00699127	0.342065	Distal-Intergenic	NA	NA	NA			Hypo
Chr18	61168720	61169760	0.624659	0.00702906	0.343321	Exon-(uc008fbi.1/240332,-exon-2-of-14)	ENSMUSG00000052026	Slc6a7	solute-carrier-family-6-(neurotransmitter-transporter,-L-proline),-member-7			Hyper
Chr1	71945277	71946387	0.465235	0.00704365	0.343402	Distal-Intergenic	NA	NA	NA			Hyper
Chr12	108384860	108385990	-0.544858	0.007066	0.343402	Distal-Intergenic	NA	NA	NA			Hypo
Chr2	179990431	179991553	-0.503156	0.00706886	0.343402	Promoter-(<=1kb)	ENSMUSG00000039001	Rps21	ribosomal-protein-S21			Hypo
Chr14	76870827	76871828	0.402665	0.00709107	0.343402	Intron-(uc007uri.2/21807,-intron-1-of-2)	ENSMUSG00000022010	Tsc22d1	TSC22-domain-family,-member-1			Hyper
Chr9	110452959	110454080	0.471214	0.00710631	0.343402	Exon-(uc009rug.2/235626,-exon-3-of-21)	ENSMUSG00000044791	Setd2	SET-domain-containing-2	yes	yes	Hyper
Chr14	76274556	76275745	-0.502122	0.00711175	0.343402	Distal-Intergenic	NA	NA	NA			Hypo
Chr5	8982374	8983570	0.601815	0.00711945	0.343402	Intron-(uc008wkt.1/74114,-intron-7-of-17)	ENSMUSG00000003623	Crot	carnitine-O-octanoyltransferase			Hyper
Chr9	87213617	87214789	0.537889	0.00712915	0.343402	Distal-Intergenic	NA	NA	NA			Hyper
Chr9	90003916	90005840	0.392067	0.00715155	0.343402	Exon-(uc009qzw.2/21761,-exon-2-of-13)	ENSMUSG00000062270	Morf4l1	mortality-factor-4-like-1			Hyper
Chr9	62704868	62706068	-0.463651	0.00715194	0.343402	Promoter-(<=1kb)	ENSMUSG00000032246	Calml4	calmodulin-like-4		yes	Hypo
Chr3	37954156	37955273	0.671362	0.00717285	0.343632	Distal-Intergenic	NA	NA	NA			Hyper
Chr6	22128338	22129428	-0.620081	0.00718099	0.343632	Intron-(uc009bav.1/214642,-intron-15-of-21)	ENSMUSG00000029671	Wnt16	wingless-type-MMTV-integration-site-family,-member-16		yes	Hypo
Chr10	92969581	92970714	-0.526239	0.00724699	0.346206	Exon-(uc007gus.1/15109,-exon-17-of-20)	ENSMUSG00000020017	Hal	histidine-ammonia-lyase		yes	Hypo
Chr13	18964665	18966254	0.531051	0.00726959	0.346307	Distal-Intergenic	NA	NA	NA			Hyper
Chr1	137594513	137595909	-0.440309	0.00727356	0.346307	Distal-Intergenic	NA	NA	NA			Hypo
Chr16	36557898	36559057	-0.583444	0.00731082	0.347409	Intron-(uc007zcp.1/12374,-intron-1-of-6)	ENSMUSG00000051980	Casr	calcium-sensing-receptor		yes	Hypo
Chr11	88569941	88571039	-0.427017	0.0073327	0.347409	Intron-(uc007kvl.2/76626,-intron-5-of-13)	NA	NA	NA			Hypo
Chr2	75275901	75276983	-0.476443	0.00734353	0.347409	Distal-Intergenic	NA	NA	NA			Hypo
Chr19	24325280	24326420	-0.531516	0.00734576	0.347409	Distal-Intergenic	NA	NA	NA			Hypo
Chr2	6715563	6716780	0.627841	0.00735824	0.34742	Intron-(uc008igo.1/14007,-intron-1-of-11)	ENSMUSG00000002107	Celf2	CUGBP,-Elav-like-family-member-2		yes	Hyper
Chr12	107680552	107681722	-0.515616	0.00740394	0.347783	Exon-(uc011yrn.1/76639,-exon-4-of-4)	ENSMUSG00000092066	1700121N20Rik	RIKEN-cDNA-1700121N20-gene			Hypo
Chr9	29185947	29187098	0.449502	0.00741157	0.347783	Intron-(uc009oqt.1/235106,-intron-1-of-6)	ENSMUSG00000059974	Ntm	neurotrimin		yes	Hyper
Chr19	22577868	22578942	0.559801	0.00741467	0.347783	Intron-(uc008gzj.1/226025,-intron-1-of-25)	ENSMUSG00000052387	Trpm3	transient-receptor-potential-cation-channel,-subfamily-M,-member-3	yes	yes	Hyper
Chr16	95512593	95513884	0.560794	0.00741506	0.347783	5'-UTR	ENSMUSG00000062609	Kcnj15	potassium-inwardly-rectifying-channel,-subfamily-J,-member-15			Hyper
Chr14	120812834	120813834	0.472584	0.0075528	0.352113	Intron-(uc007uzr.1/105559,-intron-8-of-8)	ENSMUSG00000051615	Rap2a	RAS-related-protein-2a		yes	Hyper
Chr14	47048307	47049496	-0.553187	0.00755677	0.352113	Distal-Intergenic	NA	NA	NA			Hypo
Chr4	9087884	9089967	0.432739	0.00756466	0.352113	Distal-Intergenic	NA	NA	NA			Hyper
Chr10	12660415	12662193	-0.348685	0.00757965	0.352113	5'-UTR	ENSMUSG00000039232	Stx11	syntaxin-11			Hypo
Chr7	53020985	53022078	-0.590702	0.00758532	0.352113	Distal-Intergenic	NA	NA	NA			Hypo
Chr15	75394088	75395312	-0.537545	0.00759952	0.352113	Promoter-(1-2kb)	ENSMUSG00000022577	Ly6h	lymphocyte-antigen-6-complex,-locus-H			Hypo
Chr13	100003537	100004629	-0.397216	0.00760919	0.352113	Exon-(uc007rpl.1/238803,-exon-3-of-5)	ENSMUSG00000050919	Zfp366	zinc-finger-protein-366			Hypo
Chr2	44190351	44191705	0.487702	0.00762615	0.352113	Intron-(uc008jow.1/76117,-intron-13-of-13)	ENSMUSG00000036890	Gtdc1	glycosyltransferase-like-domain-containing-1			Hyper
Chr11	95550011	95551284	-0.44482	0.00763031	0.352113	Distal-Intergenic	NA	NA	NA			Hypo
Chr5	148269003	148270057	0.504056	0.00763166	0.352113	Intron-(uc009aod.2/72587,-intron-4-of-18)	ENSMUSG00000029647	Pan3	PAN3-poly(A)-specific-ribonuclease-subunit			Hyper
Chr8	129024378	129025450	-0.483599	0.00767786	0.353095	Distal-Intergenic	NA	NA	NA			Hypo
Chr9	87761861	87763352	0.508668	0.00767787	0.353095	Distal-Intergenic	NA	NA	NA			Hyper
Chr10	80268826	80270158	-0.59041	0.00773352	0.353523	Promoter-(<=1kb)	ENSMUSG00000035262	Amh	anti-Mullerian-hormone			Hypo
Chr5	139350899	139352097	-0.505724	0.00774055	0.353523	Distal-Intergenic	NA	NA	NA			Hypo
Chr15	68179140	68180337	0.443615	0.00774861	0.353523	Distal-Intergenic	NA	NA	NA			Hyper
Chr8	67184256	67185273	-0.672511	0.00775828	0.353523	Distal-Intergenic	NA	NA	NA			Hypo
Chr10	115532459	115533480	0.574173	0.00776174	0.353523	Intron-(uc007hbp.2/19279,-intron-2-of-13)	ENSMUSG00000074734	4933416C03Rik	RIKEN-cDNA-4933416C03-gene			Hyper
Chr18	56573450	56574540	0.494904	0.00776205	0.353523	Intron-(uc008eyj.1/107022,-intron-1-of-14)	ENSMUSG00000001700	Gramd3	GRAM-domain-containing-3			Hyper
Chr18	56312861	56313910	0.561999	0.00777995	0.353769	Distal-Intergenic	NA	NA	NA			Hyper
Chr2	25422236	25423381	0.414331	0.00781475	0.35419	Exon-(uc008iso.1/381352,-exon-11-of-29)	ENSMUSG00000026941	Mamdc4	MAM-domain-containing-4			Hyper
Chr3	88836192	88837390	0.621692	0.00782215	0.35419	Exon-(uc008pxj.1/192195,-exon-7-of-27)	ENSMUSG00000041263	Rusc1	RUN-and-SH3-domain-containing-1			Hyper
Chr11	76394131	76395371	-0.54589	0.0078267	0.35419	Promoter-(2-3kb)	ENSMUSG00000017631	Abr	active-BCR-related-gene			Hypo
Chr8	129063306	129064570	0.406215	0.00784283	0.354353	Distal-Intergenic	NA	NA	NA			Hyper
Chr4	4712260	4713418	0.558572	0.00788483	0.355684	Intron-(uc008rxc.1/242291,-intron-1-of-4)	ENSMUSG00000066324	Impad1	inositol-monophosphatase-domain-containing-1			Hyper
Chr10	118966530	118967605	-0.482053	0.00790012	0.355807	Intron-(uc007heg.1/74053,-intron-1-of-21)	ENSMUSG00000034813	Grip1	glutamate-receptor-interacting-protein-1	yes	yes	Hypo
Chr14	56246547	56247711	-0.411321	0.00791809	0.35605	Exon-(uc007tzp.1/75751,-exon-23-of-30)	ENSMUSG00000002319	Ipo4	importin-4			Hypo
Chr15	7880802	7881866	0.494992	0.00794758	0.356368	Intron-(uc007veg.1/545085,-intron-10-of-17)	ENSMUSG00000022144	Gdnf	glial-cell-line-derived-neurotrophic-factor		yes	Hyper
Chr9	28470899	28471974	0.47609	0.00795032	0.356368	Intron-(uc009oqr.1/330908,-intron-2-of-7)	ENSMUSG00000062257	Opcml	opioid-binding-protein/cell-adhesion-molecule-like		yes	Hyper
Chr10	41620532	41621968	0.37078	0.00799402	0.357417	Intron-(uc007eye.2/140742,-intron-5-of-9)	ENSMUSG00000038332	Sesn1	sestrin-1		yes	Hyper
Chr4	151672554	151673693	-0.446059	0.00800076	0.357417	Promoter-(1-2kb)	ENSMUSG00000039662	Icmt	isoprenylcysteine-carboxyl-methyltransferase		yes	Hypo
Chr13	44964524	44965775	0.409446	0.00801432	0.357417	Intron-(uc007qgr.1/16468,-intron-4-of-18)	ENSMUSG00000038518	Jarid2	jumonji,-AT-rich-interactive-domain-2		yes	Hyper
Chr10	66642632	66645087	0.391104	0.00803184	0.357417	Intron-(uc011xfo.1/108829,-intron-2-of-9)	ENSMUSG00000037876	Jmjd1c	jumonji-domain-containing-1C			Hyper
Chr11	58829735	58830927	-0.591659	0.00803681	0.357417	Intron-(uc007jdb.2/380698,-intron-83-of-105)	ENSMUSG00000061462	Obscn	obscurin,-cytoskeletal-calmodulin-and-titin-interacting-RhoGEF			Hypo
Chr10	44580583	44583385	0.362978	0.00805677	0.357521	Distal-Intergenic	NA	NA	NA			Hyper
Chr13	36223151	36224353	0.413334	0.00806439	0.357521	Intron-(uc007qck.1/69955,-intron-1-of-6)	ENSMUSG00000021420	Fars2	phenylalanine-tRNA-synthetase-2-(mitochondrial)			Hyper
Chr4	55760515	55761529	0.686216	0.00809991	0.35819	Distal-Intergenic	NA	NA	NA			Hyper
Chr3	130939282	130940383	-0.4561	0.00810763	0.35819	Intron-(uc008rjl.1/15107,-intron-6-of-7)	ENSMUSG00000027984	Hadh	hydroxyacyl-Coenzyme-A-dehydrogenase			Hypo
Chr13	111426893	111427980	0.484293	0.0081174	0.35819	Intron-(uc007rvt.1/uc007rvt.1,-intron-3-of-4)	ENSMUSG00000021701	Plk2	polo-like-kinase-2		yes	Hyper
Chr4	22032295	22033355	-0.585881	0.00817487	0.359855	Distal-Intergenic	NA	NA	NA			Hypo
Chr4	69887098	69888526	-0.407515	0.00818571	0.359855	Intron-(uc008thy.1/214444,-intron-35-of-36)	ENSMUSG00000039298	Cdk5rap2	CDK5-regulatory-subunit-associated-protein-2		yes	Hypo
Chr1	15880824	15881847	0.536673	0.00819326	0.359855	Promoter-(<=1kb)	ENSMUSG00000032719	Sbspon	somatomedin-B-and-thrombospondin,-type-1-domain-containing			Hyper
Chr16	17167748	17168918	0.52232	0.00822253	0.360582	Intron-(uc007ykl.1/22195,-intron-2-of-3)	ENSMUSG00000041774	Ydjc	YdjC-homolog-(bacterial)			Hyper
Chr2	131261484	131262514	0.63962	0.00824108	0.360837	Distal-Intergenic	NA	NA	NA			Hyper
Chr11	49908878	49910029	0.423407	0.00830505	0.361266	Exon-(uc007irl.1/59044,-exon-7-of-9)	ENSMUSG00000065417	Mir340	microRNA-340			Hyper
Chr3	84512112	84513480	0.495966	0.00830578	0.361266	Intron-(uc008pqg.2/99889,-intron-3-of-9)	ENSMUSG00000056498	Tmem154	transmembrane-protein-154			Hyper
Chr5	132193039	132195207	0.337903	0.0083064	0.361266	Intron-(uc008zuv.1/319974,-intron-5-of-19)	ENSMUSG00000029673	Auts2	autism-susceptibility-candidate-2	yes	yes	Hyper
Chr3	119445518	119447312	-0.426264	0.00831228	0.361266	Promoter-(1-2kb)	ENSMUSG00000028134	Ptbp2	polypyrimidine-tract-binding-protein-2		yes	Hypo
Chr7	78265662	78266915	0.621261	0.00832706	0.361266	Distal-Intergenic	NA	NA	NA			Hyper
Chr4	114140460	114141811	-0.496156	0.00832738	0.361266	Intron-(uc008ueb.1/666048,-intron-2-of-6)	ENSMUSG00000070867	Trabd2b	TraB-domain-containing-2B			Hypo
Chr4	128183672	128184687	-0.461777	0.00835126	0.361748	Intron-(uc008uvb.1/uc008uvb.1,-intron-24-of-34)	ENSMUSG00000061894	Zscan20	zinc-finger-and-SCAN-domains-20			Hypo
Chr11	79411173	79412301	0.373186	0.008424	0.36289	Intron-(uc007kku.1/268451,-intron-1-of-14)	ENSMUSG00000017639	Rab11fip4	RAB11-family-interacting-protein-4-(class-II)			Hyper
Chr11	119911238	119912370	-0.442701	0.00842409	0.36289	Promoter-(2-3kb)	ENSMUSG00000025375	Aatk	apoptosis-associated-tyrosine-kinase		yes	Hypo
Chr17	66793547	66794689	-0.423278	0.00844585	0.36289	Intron-(uc008djv.2/68617,-intron-1-of-14)	ENSMUSG00000052105	Mtcl1	microtubule-crosslinking-factor-1			Hypo
Chr7	5019155	5020278	0.449126	0.00844604	0.36289	Promoter-(<=1kb)	ENSMUSG00000030435	U2af2	U2-small-nuclear-ribonucleoprotein-auxiliary-factor-(U2AF)-2			Hyper
Chr2	121374329	121375804	-0.469408	0.00844642	0.36289	3'-UTR	ENSMUSG00000027242	Wdr76	WD-repeat-domain-76			Hypo
Chr2	37299196	37300834	0.401307	0.00848141	0.36289	Promoter-(<=1kb)	ENSMUSG00000035437	Rabgap1	RAB-GTPase-activating-protein-1		yes	Hyper
Chr2	116638967	116640088	-0.473642	0.00849262	0.36289	Distal-Intergenic	NA	NA	NA			Hypo
Chr14	70350638	70351697	0.554467	0.0084991	0.36289	Intron-(uc007una.1/73523,-intron-3-of-6)	ENSMUSG00000022085	Pebp4	phosphatidylethanolamine-binding-protein-4			Hyper
Chr14	122368236	122369459	0.485657	0.00850658	0.36289	Intron-(uc007vao.1/68889,-intron-4-of-8)	ENSMUSG00000051212	Gpr183	G-protein-coupled-receptor-183			Hyper
Chr11	54253419	54254420	-0.623267	0.0085126	0.36289	Promoter-(1-2kb)	ENSMUSG00000035992	Fnip1	folliculin-interacting-protein-1		yes	Hypo
Chr10	22443040	22444627	0.355312	0.0085305	0.36289	Intron-(uc007epp.2/237336,-intron-1-of-6)	ENSMUSG00000071359	Tbpl1	TATA-box-binding-protein-like-1			Hyper
Chr9	108876423	108877439	-0.567867	0.00853134	0.36289	Exon-(uc009rrh.1/12836,-exon-80-of-118)	ENSMUSG00000076142	Mir711	microRNA-711			Hypo
Chr17	91229889	91231054	0.542456	0.00856428	0.363444	Intron-(uc008dvz.2/18189,-intron-4-of-21)	ENSMUSG00000024109	Nrxn1	neurexin-I	yes	yes	Hyper
Chr18	56972012	56973125	0.452965	0.00857415	0.363444	Intron-(uc008eyv.1/320253,-intron-1-of-4)	ENSMUSG00000024590	Lmnb1	lamin-B1		yes	Hyper
Chr9	46302724	46304102	0.551493	0.00858286	0.363444	Distal-Intergenic	NA	NA	NA			Hyper
Chr11	45593167	45594295	-0.578572	0.0085992	0.363592	Distal-Intergenic	NA	NA	NA			Hypo
Chr8	89083777	89085129	0.477428	0.0086234	0.363999	Exon-(uc009mqk.1/244562,-exon-3-of-29)	ENSMUSG00000036872	Abcc12	ATP-binding-cassette,-sub-family-C-(CFTR/MRP),-member-12			Hyper
Chr6	8545924	8547401	0.445442	0.00863453	0.363999	3'-UTR	ENSMUSG00000029638	Glcci1	glucocorticoid-induced-transcript-1			Hyper
Chr13	43769664	43770674	-0.418422	0.00864801	0.364026	Distal-Intergenic	NA	NA	NA			Hypo
Chr2	162130885	162131952	0.548702	0.00869842	0.36479	Intron-(uc008nrw.1/19281,-intron-2-of-29)	ENSMUSG00000053141	Ptprt	protein-tyrosine-phosphatase,-receptor-type,-T			Hyper
Chr2	172467824	172469115	-0.497051	0.00872294	0.36479	Distal-Intergenic	NA	NA	NA			Hypo
Chr12	36576802	36577962	-0.523903	0.00874265	0.36479	Distal-Intergenic	NA	NA	NA			Hypo
Chr4	149158114	149159161	0.481258	0.00874856	0.36479	Distal-Intergenic	NA	NA	NA			Hyper
Chr5	125491012	125492376	-0.343972	0.0087506	0.36479	3'-UTR	ENSMUSG00000037962	Rflna	refilin-A			Hypo
Chr4	44217415	44218850	0.519767	0.00875888	0.36479	Distal-Intergenic	NA	NA	NA			Hyper
Chr11	77642666	77643704	-0.367346	0.00875941	0.36479	Exon-(uc007khg.1/360013,-exon-17-of-40)	ENSMUSG00000000631	Myo18a	myosin-XVIIIA			Hypo
Chr13	78350986	78352399	0.389165	0.00876918	0.36479	Intron-(uc007rhf.1/uc007rhf.1,-intron-1-of-2)	ENSMUSG00000069171	Nr2f1	nuclear-receptor-subfamily-2,-group-F,-member-1			Hyper
Chr8	122554342	122555469	-0.382764	0.00897815	0.372545	Exon-(uc012glu.1/78892,-exon-12-of-15)	ENSMUSG00000031825	Crispld2	cysteine-rich-secretory-protein-LCCL-domain-containing-2			Hypo
Chr9	106790955	106792720	-0.38244	0.00900527	0.372545	Promoter-(<=1kb)	ENSMUSG00000032575	Manf	mesencephalic-astrocyte-derived-neurotrophic-factor		yes	Hypo
Chr11	58977649	58978715	-0.451582	0.00901314	0.372545	Promoter-(<=1kb)	ENSMUSG00000049287	Iba57	IBA57-homolog,-iron-sulfur-cluster-assembly			Hypo
Chr1	93074437	93075482	-0.579957	0.00901906	0.372545	Promoter-(<=1kb)	ENSMUSG00000034353	Ramp1	receptor-(calcitonin)-activity-modifying-protein-1			Hypo
Chr19	22731872	22733226	0.568624	0.00902135	0.372545	Intron-(uc008gzj.1/226025,-intron-1-of-25)	ENSMUSG00000052387	Trpm3	transient-receptor-potential-cation-channel,-subfamily-M,-member-3	yes	yes	Hyper
Chr13	55725416	55726891	-0.415349	0.00905076	0.372818	Promoter-(1-2kb)	ENSMUSG00000021501	Caml	calcium-modulating-ligand			Hypo
Chr13	52820992	52822185	-0.515208	0.00906388	0.372818	Downstream-(2-3kb)	NA	BB123696	expressed-sequence-BB123696			Hypo
Chr15	82187868	82189863	0.44195	0.00906745	0.372818	Distal-Intergenic	NA	NA	NA			Hyper
Chr16	44244826	44245850	0.530055	0.00914049	0.374867	Exon-(uc007zhd.1/320007,-exon-22-of-25)	ENSMUSG00000068284	Usf3	upstream-transcription-factor-family-member-3			Hyper
Chr2	77224445	77225464	0.525785	0.00914375	0.374867	Distal-Intergenic	NA	NA	NA			Hyper
Chr14	63333468	63334642	0.590746	0.00923076	0.376314	3'-UTR	ENSMUSG00000035161	Ints6	integrator-complex-subunit-6			Hyper
Chr19	8925931	8927337	0.4419	0.00923962	0.376314	Promoter-(<=1kb)	ENSMUSG00000071656	Lrrn4cl	LRRN4-C-terminal-like			Hyper
Chr12	67647984	67649008	-0.530831	0.0092506	0.376314	Intron-(uc007nrl.2/320772,-intron-10-of-15)	ENSMUSG00000060499	Rpl10l	ribosomal-protein-L10-like			Hypo
Chr14	56932314	56933328	-0.562914	0.00925167	0.376314	Distal-Intergenic	NA	NA	NA			Hypo
Chr3	95859314	95861003	0.377161	0.00925238	0.376314	Promoter-(1-2kb)	ENSMUSG00000015747	Vps45	vacuolar-protein-sorting-45			Hyper
Chr6	115266508	115267557	0.593017	0.00925873	0.376314	Distal-Intergenic	NA	NA	NA			Hyper
Chr2	118302697	118304545	-0.386768	0.00927588	0.376471	Promoter-(<=1kb)	ENSMUSG00000009549	Srp14	signal-recognition-particle-14			Hypo
Chr6	118361091	118362151	0.567377	0.00933057	0.377768	Exon-(uc009dlo.1/213895,-exon-7-of-23)	ENSMUSG00000030138	Bms1	BMS1,-ribosome-biogenesis-factor			Hyper
Chr16	7071064	7072231	0.482238	0.00933451	0.377768	Promoter-(1-2kb)	ENSMUSG00000008658	Rbfox1	RNA-binding-protein,-fox-1-homolog-(C.-elegans)-1	yes	yes	Hyper
Chr3	103518226	103519747	-0.398252	0.00940297	0.379995	Distal-Intergenic	NA	NA	NA			Hypo
Chr15	100062108	100063613	0.401464	0.00941715	0.380026	5'-UTR	ENSMUSG00000023027	Atf1	activating-transcription-factor-1		yes	Hyper
Chr11	115995782	115996911	-0.469445	0.00946429	0.381385	Exon-(uc007mkc.1/60441,-exon-2-of-8)	ENSMUSG00000020775	Mrpl38	mitochondrial-ribosomal-protein-L38			Hypo
Chr18	57586408	57587424	-0.574444	0.0095111	0.382727	Intron-(uc008ezc.2/75084,-intron-3-of-3)	ENSMUSG00000069372	Ctxn3	cortexin-3		yes	Hypo
Chr10	25399861	25401028	-0.492327	0.00954595	0.382986	Distal-Intergenic	NA	NA	NA			Hypo
Chr6	84970666	84972408	0.409901	0.00955121	0.382986	Intron-(uc009cpa.2/75914,-intron-1-of-21)	ENSMUSG00000033769	Exoc6b	exocyst-complex-component-6B			Hyper
Chr16	87420451	87421527	0.457631	0.00958822	0.382986	Exon-(uc007zug.1/78913,-exon-7-of-30)	ENSMUSG00000052299	Ltn1	listerin-E3-ubiquitin-protein-ligase-1			Hyper
Chr6	119395942	119397090	-0.524994	0.00959539	0.382986	Promoter-(2-3kb)	ENSMUSG00000030170	Wnt5b	wingless-type-MMTV-integration-site-family,-member-5B			Hypo
Chr3	52332998	52334707	0.39562	0.00960959	0.382986	Intron-(uc008pej.1/uc008pej.1,-intron-1-of-4)	ENSMUSG00000044167	Foxo1	forkhead-box-O1		yes	Hyper
Chr2	25019055	25020082	-0.441776	0.00961433	0.382986	Distal-Intergenic	NA	NA	NA			Hypo
Chr3	116822021	116823418	-0.531643	0.00961488	0.382986	Distal-Intergenic	NA	NA	NA			Hypo
Chr17	29293148	29294542	-0.379696	0.00963608	0.382986	3'-UTR	ENSMUSG00000064147	Rab44	RAB44,-member-RAS-oncogene-family			Hypo
Chr19	28748518	28749857	-0.452652	0.00965165	0.382986	Intron-(uc008hci.1/226075,-intron-1-of-10)	ENSMUSG00000052942	Glis3	GLIS-family-zinc-finger-3			Hypo
Chr7	124779002	124780077	-0.557607	0.00965272	0.382986	Intron-(uc009jjm.1/233781,-intron-7-of-11)	ENSMUSG00000030657	Xylt1	xylosyltransferase-1			Hypo
Chr19	58525401	58527066	-0.429474	0.00969193	0.383489	Promoter-(2-3kb)	ENSMUSG00000025089	Gfra1	glial-cell-line-derived-neurotrophic-factor-family-receptor-alpha-1		yes	Hypo
Chr14	52706325	52707539	0.61271	0.00969249	0.383489	Intron-(uc007tob.2/15381,-intron-2-of-8)	ENSMUSG00000060373	Hnrnpc	heterogeneous-nuclear-ribonucleoprotein-C		yes	Hyper
Chr13	53765503	53766556	-0.491025	0.0097402	0.38484	Distal-Intergenic	NA	NA	NA			Hypo
Chr12	100011384	100012422	0.530666	0.00976281	0.385196	Promoter-(2-3kb)	ENSMUSG00000021012	Zc3h14	zinc-finger-CCCH-type-containing-14			Hyper
Chr9	106188358	106189432	-0.551677	0.00978811	0.385657	Exon-(uc009rjk.2/70235,-exon-5-of-11)	ENSMUSG00000023345	Poc1a	POC1-centriolar-protein-A			Hypo
Chr6	65791716	65793303	0.50706	0.00980405	0.385748	Intron-(uc009cek.1/70779,-intron-3-of-14)	ENSMUSG00000029913	Prdm5	PR-domain-containing-5		yes	Hyper
Chr4	103169484	103170588	-0.519154	0.00986082	0.386155	Distal-Intergenic	NA	NA	NA			Hypo
Chr3	30623798	30624869	0.526582	0.00986188	0.386155	Distal-Intergenic	NA	NA	NA			Hyper
Chr4	153394641	153395780	-0.448195	0.00986549	0.386155	3'-UTR	ENSMUSG00000078350	Smim1	small-integral-membrane-protein-1			Hypo
Chr12	109287224	109289137	-0.306061	0.00986889	0.386155	Distal-Intergenic	NA	NA	NA			Hypo
Chr19	41674493	41675647	-0.40193	0.00993076	0.387089	3'-UTR	ENSMUSG00000025019	Lcor	ligand-dependent-nuclear-receptor-corepressor			Hypo
ChrX	17835381	17836880	0.471276	0.00993909	0.387089	3'-UTR	ENSMUSG00000037369	Kdm6a	lysine-(K)-specific-demethylase-6A	yes		Hyper
Chr6	117656820	117657838	-0.493984	0.00997798	0.387089	Intron-(uc009dkx.1/uc009dkx.1,-intron-2-of-3)	ENSMUSG00000059689	Zfp637	zinc-finger-protein-637			Hypo
Chr6	145757821	145759801	-0.333678	0.00998225	0.387089	Promoter-(<=1kb)	ENSMUSG00000030259	Rassf8	Ras-association-(RalGDS/AF-6)-domain-family-(N-terminal)-member-8			Hypo
Chr7	52380939	52382913	-0.38724	0.00998868	0.387089	Promoter-(<=1kb)	ENSMUSG00000065628	Snord33	small-nucleolar-RNA,-C/D-box-33			Hypo
Chr6	47854056	47855736	-0.422064	0.00999799	0.387089	3'-UTR	ENSMUSG00000052763	Zfp212	Zinc-finger-protein-212			Hypo
Chr13	94102009	94103062	0.568209	0.0100376	0.387089	Intron-(uc007rlb.2/26556,-intron-1-of-4)	ENSMUSG00000007617	Homer1	homer-scaffolding-protein-1		yes	Hyper
Chr8	73303109	73305557	-0.287975	0.0100495	0.387089	Promoter-(1-2kb)	ENSMUSG00000031833	Mast3	microtubule-associated-serine/threonine-kinase-3			Hypo
Chr11	101161533	101162970	-0.549115	0.0100689	0.387089	Promoter-(<=1kb)	ENSMUSG00000035086	Becn1	beclin-1,-autophagy-related			Hypo
Chr3	157695490	157696597	-0.620635	0.0101033	0.387089	Promoter-(<=1kb)	ENSMUSG00000055436	Srsf11	serine/arginine-rich-splicing-factor-11			Hypo
Chr13	55081465	55082773	0.445645	0.0101039	0.387089	Intron-(uc007qpp.1/107448,-intron-1-of-15)	ENSMUSG00000025876	Unc5a	unc-5-netrin-receptor-A			Hyper
Chr15	25225923	25226954	0.474505	0.0101081	0.387089	Intron-(uc007viw.1/uc007viw.1,-intron-2-of-4)	ENSMUSG00000045763	Basp1	brain-abundant,-membrane-attached-signal-protein-1		yes	Hyper
Chr15	94464936	94466747	-0.370122	0.0101084	0.387089	Intron-(uc007xjm.1/320709,-intron-1-of-2)	ENSMUSG00000063296	Tmem117	transmembrane-protein-117			Hypo
Chr13	19167563	19168807	0.449209	0.0101291	0.387089	Intron-(uc007pol.1/218038,-intron-2-of-8)	ENSMUSG00000021314	Amph	amphiphysin		yes	Hyper
Chr7	53141628	53143952	-0.347102	0.0101304	0.387089	3'-UTR	ENSMUSG00000040231	Syngr4	synaptogyrin-4			Hypo
Chr16	24015665	24017000	0.471642	0.0101374	0.387089	Distal-Intergenic	NA	NA	NA			Hyper
Chr5	15476514	15477690	0.490058	0.0101383	0.387089	Intron-(uc008wmw.2/12293,-intron-1-of-2)	ENSMUSG00000040118	Cacna2d1	calcium-channel,-voltage-dependent,-alpha2/delta-subunit-1		yes	Hyper
Chr2	77557068	77558109	0.483833	0.0101387	0.387089	5'-UTR	ENSMUSG00000027016	Zfp385b	zinc-finger-protein-385B			Hyper
Chr11	95809191	95810481	-0.461612	0.0101714	0.387798	Distal-Intergenic	NA	NA	NA			Hypo
Chr10	14106195	14107472	-0.534911	0.0102058	0.387798	Distal-Intergenic	NA	NA	NA			Hypo
Chr19	29599993	29601723	0.414208	0.0102146	0.387798	Promoter-(2-3kb)	ENSMUSG00000097855	A930007I19Rik	RIKEN-cDNA-A930007I19-gene			Hyper
Chr1	186423988	186425100	-0.578714	0.0102152	0.387798	Distal-Intergenic	NA	NA	NA			Hypo
Chr6	98502493	98503698	-0.472339	0.0102257	0.387798	Distal-Intergenic	NA	NA	NA			Hypo
Chr10	53647598	53649373	-0.399425	0.0102605	0.388271	Intron-(uc011xdx.1/17155,-intron-7-of-11)	ENSMUSG00000003746	Man1a	mannosidase-1,-alpha			Hypo
Chr8	124247878	124249074	0.457444	0.0102656	0.388271	Distal-Intergenic	NA	NA	NA			Hyper
Chr13	48337843	48339437	-0.444576	0.0102827	0.388397	Intron-(uc007qib.1/uc007qib.1,-intron-1-of-2)	ENSMUSG00000021379	Id4	inhibitor-of-DNA-binding-4			Hypo
Chr5	99439388	99440519	-0.566047	0.0103258	0.388401	Intron-(uc008ygj.2/19092,-intron-2-of-18)	ENSMUSG00000029334	Prkg2	protein-kinase,-cGMP-dependent,-type-II		yes	Hypo
Chr11	5581720	5582906	0.651844	0.0103444	0.388401	Intron-(uc007hwr.1/76389,-intron-25-of-26)	ENSMUSG00000020477	Mrps24	mitochondrial-ribosomal-protein-S24			Hyper
Chr15	10997133	10998340	-0.513221	0.0103446	0.388401	Promoter-(2-3kb)	ENSMUSG00000047497	Adamts12	a-disintegrin-like-and-metallopeptidase-(reprolysin-type)-with-thrombospondin-type-1-motif,-12		yes	Hypo
Chr2	135502660	135503676	0.486039	0.0103497	0.388401	Intron-(uc008mob.1/18798,-intron-1-of-28)	ENSMUSG00000039943	Plcb4	phospholipase-C,-beta-4		yes	Hyper
Chr18	43476025	43477051	0.445328	0.0103882	0.388401	3'-UTR	ENSMUSG00000024501	Dpysl3	dihydropyrimidinase-like-3		yes	Hyper
Chr14	65737219	65738382	0.43697	0.0104109	0.388401	Distal-Intergenic	NA	NA	NA			Hyper
Chr11	87886461	87887971	0.3204	0.010431	0.388401	Exon-(uc007kvf.1/22344,-exon-2-of-6)	ENSMUSG00000018377	Vezf1	vascular-endothelial-zinc-finger-1			Hyper
Chr1	77244033	77245283	0.53231	0.0104583	0.388401	Distal-Intergenic	NA	NA	NA			Hyper
Chr2	69365169	69366176	-0.543659	0.0104587	0.388401	Exon-(uc008jyc.1/14725,-exon-10-of-79)	ENSMUSG00000027070	Lrp2	low-density-lipoprotein-receptor-related-protein-2	yes	yes	Hypo
Chr13	32518512	32519562	0.465089	0.0104853	0.388401	Distal-Intergenic	NA	NA	NA			Hyper
Chr18	56184176	56185553	-0.424893	0.0104903	0.388401	Distal-Intergenic	NA	NA	NA			Hypo
Chr5	77981724	77982737	-0.604606	0.0104963	0.388401	Distal-Intergenic	NA	NA	NA			Hypo
Chr15	73387366	73388516	-0.426521	0.0104967	0.388401	Exon-(uc007wce.1/105841,-exon-16-of-23)	ENSMUSG00000079020	Slc45a4	solute-carrier-family-45,-member-4		yes	Hypo
Chr17	5764856	5766475	-0.381163	0.010499	0.388401	Distal-Intergenic	NA	NA	NA			Hypo
Chr17	53684851	53685880	-0.697806	0.0104992	0.388401	Distal-Intergenic	NA	NA	NA			Hypo
Chr8	97062530	97063719	0.396984	0.0105229	0.388401	Intron-(uc009mwl.1/234577,-intron-1-of-2)	ENSMUSG00000034361	Cpne2	copine-II		yes	Hyper
Chr11	77318428	77319456	-0.376279	0.0105309	0.388401	Exon-(uc007kgy.1/216963,-exon-14-of-20)	ENSMUSG00000044328	Trp53i13	transformation-related-protein-53-inducible-protein-13			Hypo
Chr6	138545125	138546362	-0.524094	0.0105331	0.388401	Intron-(uc009enp.1/uc009enp.1,-intron-3-of-3)	ENSMUSG00000030226	Lmo3	LIM-domain-only-3			Hypo
Chr13	114205481	114206584	0.459102	0.0105433	0.388401	Distal-Intergenic	NA	NA	NA			Hyper
Chr7	72519212	72520962	0.410079	0.0105772	0.389146	Distal-Intergenic	NA	NA	NA			Hyper
Chr7	130415715	130417193	-0.389341	0.0106377	0.390863	3'-UTR	ENSMUSG00000030769	Slc5a11	solute-carrier-family-5-(sodium/glucose-cotransporter),-member-11			Hypo
Chr15	12150388	12151788	0.345959	0.0106704	0.391558	Intron-(uc007vhl.1/268783,-intron-1-of-15)	ENSMUSG00000039458	Mtmr12	myotubularin-related-protein-12	yes	yes	Hyper
Chr19	37283094	37284407	0.513277	0.0107177	0.392783	Promoter-(1-2kb)	ENSMUSG00000023307	2021-03-05	membrane-associated-ring-finger-(C3HC4)-5			Hyper
Chr4	53119500	53120763	0.414596	0.010746	0.393313	Exon-(uc008swu.1/11303,-exon-7-of-50)	ENSMUSG00000015243	Abca1	ATP-binding-cassette,-sub-family-A-(ABC1),-member-1		yes	Hyper
Chr7	141869960	141871268	-0.412753	0.0107615	0.39337	Intron-(uc009kdt.1/330662,-intron-1-of-20)	ENSMUSG00000058325	Dock1	dedicator-of-cytokinesis-1			Hypo
Chr1	166274169	166275797	-0.441079	0.010807	0.393921	Exon-(uc007dik.1/171567,-exon-8-of-10)	ENSMUSG00000026575	Nme7	NME/NM23-family-member-7			Hypo
Chr17	25632917	25634163	-0.547301	0.010837	0.393921	Promoter-(<=1kb)	ENSMUSG00000050824	Sstr5	somatostatin-receptor-5		yes	Hypo
Chr3	95758095	95759164	0.553844	0.0108422	0.393921	Distal-Intergenic	NA	NA	NA			Hyper
Chr9	56165836	56167019	0.442939	0.0108499	0.393921	5'-UTR	ENSMUSG00000074305	Peak1	pseudopodium-enriched-atypical-kinase-1			Hyper
Chr7	74061478	74062785	-0.601184	0.0108582	0.393921	Intron-(uc009hhw.1/233332,-intron-7-of-10)	ENSMUSG00000058145	Adamts17	a-disintegrin-like-and-metallopeptidase-(reprolysin-type)-with-thrombospondin-type-1-motif,-17		yes	Hypo
Chr2	90911023	90912024	-0.654903	0.0108821	0.393921	Promoter-(<=1kb)	ENSMUSG00000002105	Slc39a13	solute-carrier-family-39-(metal-ion-transporter),-member-13			Hypo
Chr12	29936939	29938562	-0.417748	0.0108865	0.393921	Distal-Intergenic	NA	NA	NA			Hypo
Chr16	16549351	16550963	0.525115	0.0108974	0.393921	Intron-(uc007yiq.1/224014,-intron-1-of-16)	ENSMUSG00000022788	Fgd4	FYVE,-RhoGEF-and-PH-domain-containing-4			Hyper
Chr1	192386370	192387571	-0.446247	0.0109017	0.393921	Distal-Intergenic	NA	NA	NA			Hypo
Chr4	65909241	65910317	0.504949	0.0109197	0.394023	Intron-(uc008thn.1/56079,-intron-2-of-22)	ENSMUSG00000028373	Astn2	astrotactin-2		yes	Hyper
Chr10	21023537	21024546	-0.499552	0.0109323	0.394023	Promoter-(2-3kb)	ENSMUSG00000019977	Hbs1l	Hbs1-like-(S.-cerevisiae)			Hypo
Chr17	12455762	12456792	-0.457551	0.0110214	0.39531	Exon-(uc008akn.1/26407,-exon-4-of-27)	ENSMUSG00000014426	Map3k4	mitogen-activated-protein-kinase-kinase-kinase-4		yes	Hypo
Chr1	155689038	155690207	-0.475128	0.0110245	0.39531	Distal-Intergenic	NA	NA	NA			Hypo
Chr11	29740035	29741041	0.627589	0.0110277	0.39531	Intron-(uc007ihq.1/237711,-intron-10-of-41)	ENSMUSG00000078157	4931440F15Rik	RIKEN-cDNA-4931440F15-gene			Hyper
Chr19	31276821	31277949	-0.626859	0.0110391	0.39531	Intron-(uc008heo.1/19091,-intron-3-of-17)	NA	8430431K14Rik	RIKEN-cDNA-8430431K14-gene			Hypo
Chr16	31999457	32000466	0.529032	0.0110589	0.39531	Promoter-(2-3kb)	ENSMUSG00000022772	Senp5	SUMO/sentrin-specific-peptidase-5		yes	Hyper
Chr13	53804144	53805207	-0.410929	0.011064	0.39531	Distal-Intergenic	NA	NA	NA			Hypo
Chr2	65539431	65540455	0.679515	0.0111011	0.39531	Exon-(uc008jwo.2/110876,-exon-11-of-26)	ENSMUSG00000075318	Scn2a	sodium-channel,-voltage-gated,-type-II,-alpha	yes		Hyper
Chr3	95342380	95343503	0.608695	0.0111144	0.39531	Exon-(uc008qjz.2/13040,-exon-3-of-8)	ENSMUSG00000038642	Ctss	cathepsin-S		yes	Hyper
Chr5	136561009	136563707	-0.347168	0.0111286	0.39531	Promoter-(1-2kb)	ENSMUSG00000004952	Rasa4	RAS-p21-protein-activator-4			Hypo
Chr7	139940699	139942289	0.312888	0.0111297	0.39531	Intron-(uc009kcf.1/77938,-intron-3-of-3)	ENSMUSG00000030956	Fam53b	family-with-sequence-similarity-53,-member-B			Hyper
Chr7	63307429	63308500	0.433685	0.0111588	0.39531	Promoter-(1-2kb)	ENSMUSG00000030451	Herc2	HECT-and-RLD-domain-containing-E3-ubiquitin-protein-ligase-2			Hyper
Chr1	186885527	186886658	-0.447778	0.0111894	0.39531	Distal-Intergenic	NA	NA	NA			Hypo
Chr5	121637368	121638880	0.357721	0.0111987	0.39531	Promoter-(2-3kb)	ENSMUSG00000043733	Ptpn11	protein-tyrosine-phosphatase,-non-receptor-type-11		yes	Hyper
Chr10	85059049	85060384	0.410032	0.0112054	0.39531	Promoter-(<=1kb)	ENSMUSG00000020042	Btbd11	BTB-(POZ)-domain-containing-11			Hyper
Chr6	8719905	8721131	-0.393049	0.011219	0.39531	Intron-(uc009axy.1/15893,-intron-1-of-13)	ENSMUSG00000062995	Ica1	islet-cell-autoantigen-1			Hypo
Chr16	49223954	49224996	0.537986	0.0112255	0.39531	Intron-(uc007zke.1/uc007zke.1,-intron-4-of-7)	ENSMUSG00000092009	Myh15	myosin,-heavy-chain-15			Hyper
Chr2	168503403	168504562	-0.421772	0.0112274	0.39531	Intron-(uc008obb.1/11981,-intron-9-of-27)	ENSMUSG00000027546	Atp9a	ATPase,-class-II,-type-9A			Hypo
Chr14	23449195	23450274	-0.463667	0.0112373	0.39531	Intron-(uc007slz.2/76633,-intron-5-of-6)	ENSMUSG00000063458	Lrmda	leucine-rich-melanocyte-differentiation-associated			Hypo
Chr15	11792527	11793686	0.51199	0.011276	0.39531	Intron-(uc007vhd.1/18162,-intron-2-of-6)	ENSMUSG00000022206	Npr3	natriuretic-peptide-receptor-3		yes	Hyper
Chr17	87172091	87173305	0.353808	0.0112825	0.39531	Intron-(uc008duj.2/13819,-intron-1-of-15)	ENSMUSG00000024140	Epas1	endothelial-PAS-domain-protein-1		yes	Hyper
Chr4	154605527	154606567	-0.568427	0.0113012	0.39531	Distal-Intergenic	NA	NA	NA			Hypo
Chr13	89882968	89883994	0.47058	0.0113406	0.39531	Promoter-(<=1kb)	ENSMUSG00000021614	Vcan	versican		yes	Hyper
Chr7	35834996	35836168	0.367188	0.0113614	0.39531	5'-UTR	ENSMUSG00000056216	Cebpg	CCAAT/enhancer-binding-protein-(C/EBP),-gamma			Hyper
Chr15	26537768	26538853	0.48191	0.0113624	0.39531	Intron-(uc007vjn.1/448987,-intron-2-of-3)	ENSMUSG00000043556	Fbxl7	F-box-and-leucine-rich-repeat-protein-7			Hyper
Chr8	106870094	106871275	-0.447642	0.0113672	0.39531	3'-UTR	ENSMUSG00000031875	Cmtm3	CKLF-like-MARVEL-transmembrane-domain-containing-3			Hypo
Chr5	113482601	113483790	-0.451264	0.0113819	0.39531	Distal-Intergenic	NA	NA	NA			Hypo
Chr13	60419144	60420568	0.526602	0.0114018	0.39531	Distal-Intergenic	NA	NA	NA			Hyper
Chr5	115876492	115877518	-0.481815	0.0114101	0.39531	Promoter-(2-3kb)	ENSMUSG00000054256	Msi1	musashi-RNA-binding-protein-1		yes	Hypo
Chr13	34859262	34860471	-0.436553	0.0114268	0.39531	Distal-Intergenic	NA	NA	NA			Hypo
Chr2	90700355	90701406	0.579836	0.0114442	0.39531	Exon-(uc008ktn.1/56428,-exon-10-of-13)	ENSMUSG00000027282	Mtch2	mitochondrial-carrier-2			Hyper
Chr2	144504390	144505610	0.420524	0.0114503	0.39531	Intron-(uc008mro.2/66044,-intron-4-of-5)	ENSMUSG00000027430	Dtd1	D-tyrosyl-tRNA-deacylase-1			Hyper
Chr2	122095277	122096461	-0.51792	0.0114807	0.39531	Distal-Intergenic	NA	NA	NA			Hypo
Chr2	162416003	162417212	0.555254	0.0114847	0.39531	Intron-(uc008nrw.1/19281,-intron-1-of-29)	ENSMUSG00000053141	Ptprt	protein-tyrosine-phosphatase,-receptor-type,-T			Hyper
Chr18	63103890	63104923	-0.404163	0.0114859	0.39531	Intron-(uc008fdl.1/494504,-intron-3-of-4)	ENSMUSG00000071847	Apcdd1	adenomatosis-polyposis-coli-down-regulated-1			Hypo
Chr1	93969960	93972441	0.378067	0.0114863	0.39531	Intron-(uc007cbf.1/208727,-intron-1-of-25)	ENSMUSG00000026313	Hdac4	histone-deacetylase-4		yes	Hyper
Chr7	52345846	52347234	-0.455542	0.0114907	0.39531	Promoter-(<=1kb)	ENSMUSG00000019539	Rcn3	reticulocalbin-3,-EF-hand-calcium-binding-domain			Hypo
Chr7	151555626	151556831	0.407919	0.0114946	0.39531	Intron-(uc009kqe.2/210274,-intron-7-of-15)	ENSMUSG00000037541	Shank2	SH3-and-multiple-ankyrin-repeat-domains-2		yes	Hyper
Chr5	22932578	22933655	0.517554	0.0114983	0.39531	Intron-(uc008wpw.1/uc008wpw.1,-intron-1-of-7)	ENSMUSG00000029004	Kmt2e	lysine-(K)-specific-methyltransferase-2E			Hyper
Chr5	103570508	103571514	0.530101	0.0115566	0.39639	Intron-(uc008yjd.1/26414,-intron-2-of-13)	ENSMUSG00000046709	Mapk10	mitogen-activated-protein-kinase-10		yes	Hyper
Chr2	29879228	29880337	0.551248	0.0115577	0.39639	Intron-(uc008jar.1/20740,-intron-44-of-56)	ENSMUSG00000057738	Sptan1	spectrin-alpha,-non-erythrocytic-1			Hyper
Chr4	123605932	123607794	0.431847	0.0116313	0.39772	Exon-(uc008uqm.1/54170,-exon-6-of-7)	ENSMUSG00000028646	Rragc	Ras-related-GTP-binding-C			Hyper
Chr10	126968743	126970017	0.641129	0.0116534	0.39772	Promoter-(1-2kb)	ENSMUSG00000040258	Nxph4	neurexophilin-4			Hyper
Chr2	59908541	59910487	0.404595	0.0116672	0.39772	Intron-(uc008jtr.1/407823,-intron-2-of-35)	ENSMUSG00000026987	Baz2b	bromodomain-adjacent-to-zinc-finger-domain,-2B			Hyper
Chr3	39175738	39176903	0.544056	0.0116913	0.39772	Distal-Intergenic	NA	NA	NA			Hyper
Chr16	67508858	67510485	0.483433	0.0116945	0.39772	Intron-(uc007zqn.2/239857,-intron-1-of-9)	ENSMUSG00000064115	Cadm2	cell-adhesion-molecule-2			Hyper
Chr11	32637901	32638994	0.59971	0.0117031	0.39772	Exon-(uc007ijx.1/103583,-exon-10-of-14)	ENSMUSG00000020270	Smim23	small-integral-membrane-protein-23			Hyper
Chr7	26226902	26227994	-0.563737	0.0117092	0.39772	Intron-(uc012fft.1/654804,-intron-4-of-6)	ENSMUSG00000060188	Cxcl17	chemokine-(C-X-C-motif)-ligand-17			Hypo
Chr11	104285002	104287053	0.317901	0.0117167	0.39772	5'-UTR	ENSMUSG00000018412	Kansl1	KAT8-regulatory-NSL-complex-subunit-1	yes		Hyper
Chr19	45581076	45582187	0.53458	0.0117248	0.39772	5'-UTR	ENSMUSG00000025218	Poll	polymerase-(DNA-directed),-lambda		yes	Hyper
Chr15	85420531	85421813	-0.601278	0.0117719	0.39772	Intron-(uc007xdh.1/uc007xdh.1,-intron-3-of-4)	ENSMUSG00000022382	Wnt7b	wingless-type-MMTV-integration-site-family,-member-7B			Hypo
Chr2	4080381	4081473	-0.421175	0.0117794	0.39772	Intron-(uc008ien.2/209630,-intron-1-of-1)	ENSMUSG00000026657	Frmd4a	FERM-domain-containing-4A		yes	Hypo
Chr10	42485879	42487149	0.492411	0.0117829	0.39772	Intron-(uc007eyx.2/140740,-intron-1-of-20)	ENSMUSG00000019802	Sec63	SEC63-like-(S.-cerevisiae)			Hyper
Chr7	86416733	86417793	-0.553707	0.0117853	0.39772	Promoter-(<=1kb)	ENSMUSG00000039202	Abhd2	abhydrolase-domain-containing-2			Hypo
Chr5	89022435	89023881	0.377745	0.011813	0.39772	Intron-(uc008xzw.1/52822,-intron-1-of-12)	ENSMUSG00000029291	Rufy3	RUN-and-FYVE-domain-containing-3			Hyper
Chr9	103473934	103474965	0.384458	0.0118272	0.39772	Intron-(uc009rgx.2/81907,-intron-2-of-4)	ENSMUSG00000032556	Bfsp2	beaded-filament-structural-protein-2,-phakinin			Hyper
Chr4	129523924	129524947	-0.447437	0.0118399	0.39772	Exon-(uc012dls.1/19244,-exon-5-of-6)	ENSMUSG00000028788	Ptp4a2	protein-tyrosine-phosphatase-4a2		yes	Hypo
Chr18	43266131	43267316	0.515768	0.01184	0.39772	Intron-(uc008eud.1/uc008eud.1,-intron-1-of-8)	ENSMUSG00000024500	Ppp2r2b	protein-phosphatase-2,-regulatory-subunit-B,-beta		yes	Hyper
Chr16	43416121	43417166	0.544878	0.011857	0.39772	Intron-(uc007zga.2/56490,-intron-4-of-10)	ENSMUSG00000022708	Zbtb20	zinc-finger-and-BTB-domain-containing-20		yes	Hyper
Chr6	40239738	40240930	-0.544102	0.0118632	0.39772	Distal-Intergenic	NA	NA	NA			Hypo
Chr5	104008648	104010245	-0.44444	0.0118986	0.398433	Exon-(uc008yjl.1/19249,-exon-39-of-48)	ENSMUSG00000034573	Ptpn13	protein-tyrosine-phosphatase,-non-receptor-type-13			Hypo
Chr8	122204098	122205192	-0.528947	0.0119334	0.398475	Exon-(uc009nqd.1/67866,-exon-3-of-5)	ENSMUSG00000023336	Wfdc1	WAP-four-disulfide-core-domain-1			Hypo
Chr4	58726562	58727710	-0.407817	0.0119335	0.398475	Distal-Intergenic	NA	NA	NA			Hypo
Chr5	99619698	99621861	0.371597	0.0119479	0.398475	Distal-Intergenic	NA	NA	NA			Hyper
Chr3	148117282	148118385	0.499346	0.0119615	0.398475	Distal-Intergenic	NA	NA	NA			Hyper
Chr2	163588768	163591481	-0.30885	0.0119701	0.398475	Distal-Intergenic	NA	NA	NA			Hypo
Chr5	113434118	113435433	-0.353613	0.012044	0.400143	Intron-(uc008ytt.1/320129,-intron-1-of-20)	ENSMUSG00000042249	Grk3	G-protein-coupled-receptor-kinase-3			Hypo
Chr10	58954231	58955412	0.51744	0.0120485	0.400143	Intron-(uc007fdt.2/215999,-intron-1-of-7)	ENSMUSG00000009647	Mcu	mitochondrial-calcium-uniporter			Hyper
Chr7	25817229	25818452	-0.36971	0.0120688	0.400347	Intron-(uc009frh.2/14809,-intron-12-of-19)	ENSMUSG00000040907	Atp1a3	ATPase,-Na+/K+-transporting,-alpha-3-polypeptide		yes	Hypo
Chr1	92345476	92346576	0.579458	0.0121011	0.400838	Distal-Intergenic	NA	NA	NA			Hyper
Chr1	160782842	160783857	0.520325	0.0121119	0.400838	Intron-(uc007ddv.1/23850,-intron-5-of-21)	ENSMUSG00000073530	Pappa2	pappalysin-2			Hyper
Chr18	62916102	62917133	-0.419746	0.0121656	0.400911	Promoter-(<=1kb)	ENSMUSG00000041789	2700046A07Rik	RIKEN-cDNA-2700046A07-gene			Hypo
Chr2	109851211	109853065	0.404802	0.0122043	0.400911	3'-UTR	ENSMUSG00000027160	Ccdc34	coiled-coil-domain-containing-34			Hyper
Chr15	40002834	40003840	-0.537125	0.0122106	0.400911	Distal-Intergenic	NA	NA	NA			Hypo
Chr1	42339675	42340784	-0.475168	0.0122368	0.400911	Distal-Intergenic	NA	NA	NA			Hypo
Chr3	35807241	35808483	0.502406	0.0122387	0.400911	Intron-(uc008oyw.1/114893,-intron-4-of-6)	ENSMUSG00000027708	Dcun1d1	DCN1,-defective-in-cullin-neddylation-1,-domain-containing-1-(S.-cerevisiae)			Hyper
Chr9	47780673	47781733	0.590821	0.0122427	0.400911	Distal-Intergenic	NA	NA	NA			Hyper
Chr6	3913179	3914497	0.557219	0.0122428	0.400911	3'-UTR	ENSMUSG00000029664	Tfpi2	tissue-factor-pathway-inhibitor-2		yes	Hyper
Chr1	184826913	184828191	-0.590129	0.0122525	0.400911	Distal-Intergenic	NA	NA	NA			Hypo
Chr10	126768072	126769148	-0.431414	0.0122633	0.400911	Exon-(uc007hjf.1/14632,-exon-13-of-13)	ENSMUSG00000040345	Arhgap9	Rho-GTPase-activating-protein-9			Hypo
Chr2	173126595	173127873	-0.355431	0.0122651	0.400911	Distal-Intergenic	NA	NA	NA			Hypo
Chr10	89250963	89252408	0.461475	0.0122766	0.400911	Exon-(uc011xll.1/75089,-exon-7-of-12)	ENSMUSG00000019951	Uhrf1bp1l	UHRF1-(ICBP90)-binding-protein-1-like			Hyper
Chr17	49292940	49295237	0.312307	0.0122844	0.400911	Distal-Intergenic	NA	NA	NA			Hyper
Chr17	34061870	34063835	-0.340511	0.0122981	0.400911	Exon-(uc008cae.1/21356,-exon-4-of-8)	ENSMUSG00000041354	Rgl2	ral-guanine-nucleotide-dissociation-stimulator-like-2			Hypo
Chr4	124646818	124648215	-0.423198	0.0123459	0.401546	Distal-Intergenic	NA	NA	NA			Hypo
Chr16	42051966	42053235	0.539782	0.0123604	0.401546	Intron-(uc007zfr.1/268890,-intron-5-of-8)	ENSMUSG00000047261	Gap43	growth-associated-protein-43		yes	Hyper
Chr6	47305268	47307657	-0.317742	0.0123768	0.401546	Distal-Intergenic	NA	NA	NA			Hypo
Chr7	124792145	124793564	-0.418979	0.012387	0.401546	Intron-(uc009jjm.1/233781,-intron-9-of-11)	ENSMUSG00000030657	Xylt1	xylosyltransferase-1			Hypo
Chr17	17758809	17759916	0.544697	0.012396	0.401546	Promoter-(1-2kb)	ENSMUSG00000023845	Lnpep	leucyl/cystinyl-aminopeptidase			Hyper
Chr5	107681930	107682989	0.550437	0.0124057	0.401546	Intron-(uc008ylz.2/21814,-intron-2-of-16)	ENSMUSG00000029287	Tgfbr3	transforming-growth-factor,-beta-receptor-III			Hyper
Chr12	56817339	56818556	0.542481	0.0124168	0.401546	Exon-(uc007nou.1/56784,-exon-20-of-41)	ENSMUSG00000021027	Ralgapa1	Ral-GTPase-activating-protein,-alpha-subunit-1			Hyper
Chr7	16710796	16711930	-0.525339	0.0124367	0.401733	Exon-(uc009fgy.2/70394,-exon-10-of-12)	ENSMUSG00000030376	Slc8a2	solute-carrier-family-8-(sodium/calcium-exchanger),-member-2		yes	Hypo
Chr7	117383821	117384887	0.518099	0.012485	0.402091	Intron-(uc009jez.2/20947,-intron-1-of-3)	ENSMUSG00000031015	Swap70	SWA-70-protein			Hyper
Chr10	126848340	126849348	0.419834	0.0124985	0.402091	Intron-(uc007hjl.2/71750,-intron-2-of-25)	ENSMUSG00000025404	R3hdm2	R3H-domain-containing-2			Hyper
Chr12	87125787	87126941	-0.436816	0.0125085	0.402091	Intron-(uc007ohe.1/217721,-intron-2-of-9)	ENSMUSG00000034258	Flvcr2	feline-leukemia-virus-subgroup-C-cellular-receptor-2			Hypo
Chr18	23100059	23101193	0.56201	0.0125154	0.402091	Intron-(uc008efq.2/319211,-intron-2-of-10)	ENSMUSG00000041923	Nol4	nucleolar-protein-4		yes	Hyper
Chr6	56866464	56867592	0.527918	0.0125255	0.402091	Intron-(uc009cbr.2/107569,-intron-1-of-8)	ENSMUSG00000029780	Nt5c3	5'-nucleotidase,-cytosolic-III			Hyper
Chr7	56852049	56853096	0.475053	0.0125465	0.402091	Exon-(uc009hbd.2/78286,-exon-34-of-39)	ENSMUSG00000030507	Dbx1	developing-brain-homeobox-1			Hyper
Chr13	112600919	112602082	-0.441392	0.0125472	0.402091	Promoter-(1-2kb)	ENSMUSG00000021754	Map3k1	mitogen-activated-protein-kinase-kinase-kinase-1		yes	Hypo
Chr16	38109638	38110722	0.435956	0.0126245	0.404113	Intron-(uc007zen.1/56637,-intron-1-of-10)	NA	BC031361	cDNA-sequence-BC031361			Hyper
Chr8	27020172	27021937	0.376261	0.0126482	0.404413	Promoter-(<=1kb)	ENSMUSG00000031576	Kcnu1	potassium-channel,-subfamily-U,-member-1			Hyper
Chr19	16513988	16515072	0.527991	0.0126885	0.405245	Intron-(uc008gwu.2/14675,-intron-1-of-6)	ENSMUSG00000024697	Gna14	guanine-nucleotide-binding-protein,-alpha-14			Hyper
Chr4	103426239	103428267	0.393297	0.0127346	0.405837	Intron-(uc008txu.1/13131,-intron-1-of-9)	ENSMUSG00000028519	Dab1	disabled-1		yes	Hyper
Chr10	30552658	30554150	0.553611	0.0127357	0.405837	3'-UTR	ENSMUSG00000019789	Hey2	hairy/enhancer-of-split-related-with-YRPW-motif-2		yes	Hyper
Chr9	34442495	34443742	0.491467	0.0128097	0.407102	Intron-(uc009osg.1/67703,-intron-1-of-13)	ENSMUSG00000032036	Kirrel3	kirre-like-nephrin-family-adhesion-molecule-3			Hyper
Chr7	133945681	133946740	-0.488254	0.0128347	0.407102	Promoter-(1-2kb)	ENSMUSG00000030695	Aldoa	aldolase-A,-fructose-bisphosphate		yes	Hypo
Chr10	116393694	116394711	-0.55983	0.0128649	0.407102	Intron-(uc007hcm.1/uc007hcm.1,-intron-2-of-2)	ENSMUSG00000064181	Rab3ip	RAB3A-interacting-protein			Hypo
Chr15	83146009	83147227	-0.580571	0.0128961	0.407102	Intron-(uc007xag.1/66251,-intron-9-of-15)	ENSMUSG00000054277	Arfgap3	ADP-ribosylation-factor-GTPase-activating-protein-3			Hypo
Chr4	101202716	101203836	0.45471	0.0128966	0.407102	Intron-(uc008tvq.2/72685,-intron-1-of-19)	ENSMUSG00000028528	Dnajc6	DnaJ-heat-shock-protein-family-(Hsp40)-member-C6		yes	Hyper
Chr1	137840239	137841259	-0.562913	0.0129059	0.407102	Distal-Intergenic	NA	NA	NA			Hypo
Chr11	52417071	52418209	-0.492131	0.0129733	0.407102	Distal-Intergenic	NA	NA	NA			Hypo
Chr15	65858024	65859148	-0.507765	0.0129824	0.407102	Intron-(uc007wab.2/110862,-intron-4-of-14)	ENSMUSG00000072511	Hhla1	HERV-H-LTR-associating-1			Hypo
Chr13	28510763	28512057	0.468043	0.0129899	0.407102	Distal-Intergenic	NA	NA	NA			Hyper
Chr15	60152152	60153325	-0.615935	0.0130014	0.407102	Distal-Intergenic	NA	NA	NA			Hypo
Chr7	36706156	36707190	0.453183	0.013006	0.407102	Distal-Intergenic	NA	NA	NA			Hyper
Chr13	93069659	93070707	0.46565	0.0130067	0.407102	Exon-(uc007rki.1/17686,-exon-11-of-24)	ENSMUSG00000014850	Msh3	mutS-homolog-3		yes	Hyper
Chr11	68335848	68336923	-0.43166	0.0130223	0.407102	Intron-(uc007jnq.1/104709,-intron-2-of-8)	ENSMUSG00000046207	Pik3r6	phosphoinositide-3-kinase-regulatory-subunit-5			Hypo
Chr6	72111909	72113052	-0.432219	0.0130389	0.407102	Exon-(uc009cib.1/uc009cib.1,-exon-1-of-2)	ENSMUSG00000056091	St3gal5	ST3-beta-galactoside-alpha-2,3-sialyltransferase-5			Hypo
Chr2	144232149	144233202	-0.377851	0.013061	0.407102	3'-UTR	ENSMUSG00000027425	Kat14	lysine-acetyltransferase-14			Hypo
Chr9	65642041	65643634	0.357318	0.0130933	0.407102	Promoter-(<=1kb)	ENSMUSG00000040524	Zfp609	zinc-finger-protein-609			Hyper
Chr17	24158891	24159995	0.549113	0.0131052	0.407102	Distal-Intergenic	NA	NA	NA			Hyper
Chr11	22000792	22001922	0.583153	0.0131323	0.407102	Exon-(uc007iea.1/216565,-exon-11-of-24)	ENSMUSG00000042302	Ehbp1	EH-domain-binding-protein-1			Hyper
Chr8	13343341	13344863	0.411786	0.0131377	0.407102	Intron-(uc009kxp.1/21781,-intron-2-of-11)	ENSMUSG00000038482	Tfdp1	transcription-factor-Dp-1		yes	Hyper
Chr3	103381709	103382729	-0.394171	0.0131386	0.407102	Promoter-(1-2kb)	ENSMUSG00000027849	Syt6	synaptotagmin-VI		yes	Hypo
Chr14	21788668	21789830	0.494214	0.0131453	0.407102	Intron-(uc007sky.1/22330,-intron-2-of-7)	ENSMUSG00000021823	Vcl	vinculin		yes	Hyper
Chr12	12368618	12369776	-0.474351	0.0131965	0.407102	Exon-(uc007nbc.2/76820,-exon-8-of-13)	ENSMUSG00000020589	Fam49a	family-with-sequence-similarity-49,-member-A			Hypo
Chr16	67159752	67160946	0.529761	0.0131966	0.407102	Intron-(uc007zqn.2/239857,-intron-1-of-9)	ENSMUSG00000064115	Cadm2	cell-adhesion-molecule-2			Hyper
Chr2	28319439	28321361	-0.373482	0.0132016	0.407102	Promoter-(<=1kb)	ENSMUSG00000026831	1700007K13Rik	RIKEN-cDNA-1700007K13-gene			Hypo
Chr10	127941299	127942318	-0.510265	0.0132059	0.407102	Distal-Intergenic	NA	NA	NA			Hypo
Chr1	156037362	156038395	-0.531675	0.0132185	0.407102	Distal-Intergenic	NA	NA	NA			Hypo
Chr5	84847239	84848482	0.433971	0.0132234	0.407102	Promoter-(<=1kb)	ENSMUSG00000029245	Epha5	Eph-receptor-A5		yes	Hyper
Chr3	34382248	34383295	0.496952	0.0132263	0.407102	Distal-Intergenic	NA	NA	NA			Hyper
Chr5	112972717	112973738	0.459502	0.0132404	0.407102	Intron-(uc008ytk.1/56747,-intron-1-of-16)	ENSMUSG00000058153	Sez6l	seizure-related-6-homolog-like		yes	Hyper
Chr1	128695188	128696804	0.37833	0.0132445	0.407102	Intron-(uc007ckm.1/210356,-intron-1-of-16)	ENSMUSG00000049690	Nckap5	NCK-associated-protein-5	yes	yes	Hyper
Chr2	144049687	144050836	-0.583085	0.0132686	0.407102	Distal-Intergenic	NA	NA	NA			Hypo
Chr2	104313302	104314480	0.424853	0.0132969	0.407102	Intron-(uc008lju.2/15259,-intron-1-of-15)	ENSMUSG00000027177	Hipk3	homeodomain-interacting-protein-kinase-3		yes	Hyper
Chr3	104200892	104201965	-0.457044	0.0132977	0.407102	Distal-Intergenic	NA	NA	NA			Hypo
Chr4	65867548	65868667	0.569542	0.0133016	0.407102	Intron-(uc008thn.1/56079,-intron-2-of-22)	ENSMUSG00000028373	Astn2	astrotactin-2		yes	Hyper
Chr7	146496286	146497554	-0.474965	0.0133077	0.407102	Distal-Intergenic	NA	NA	NA			Hypo
Chr14	28459576	28460725	0.501914	0.0133265	0.407102	Intron-(uc007sty.1/238988,-intron-2-of-7)	ENSMUSG00000040640	Erc2	ELKS/RAB6-interacting/CAST-family-member-2		yes	Hyper
Chr6	18405726	18407380	-0.509901	0.0133405	0.407102	Intron-(uc009bal.1/30785,-intron-2-of-22)	ENSMUSG00000000416	Cttnbp2	cortactin-binding-protein-2	yes		Hypo
Chr9	65925253	65926292	-0.614128	0.0133441	0.407102	Distal-Intergenic	NA	NA	NA			Hypo
Chr5	113662565	113663729	-0.645572	0.0133571	0.407102	5'-UTR	ENSMUSG00000066964	Tmem211	transmembrane-protein-211			Hypo
Chr6	124941178	124942226	-0.603708	0.0133587	0.407102	Distal-Intergenic	NA	NA	NA			Hypo
Chr13	91132916	91133961	0.471565	0.0133681	0.407102	Intron-(uc007rjr.1/66795,-intron-5-of-7)	ENSMUSG00000049517	Rps23	ribosomal-protein-S23			Hyper
Chr11	34898419	34899545	-0.542408	0.0133905	0.407102	Distal-Intergenic	NA	NA	NA			Hypo
Chr18	34996674	34997754	-0.567353	0.0133933	0.407102	Promoter-(2-3kb)	ENSMUSG00000038555	Reep2	receptor-accessory-protein-2			Hypo
Chr2	105455509	105456595	0.465114	0.0134167	0.407376	Intron-(uc008lkt.1/402728,-intron-1-of-3)	ENSMUSG00000027168	Pax6	paired-box-6		yes	Hyper
Chr5	66965680	66966986	0.367184	0.0134366	0.407384	Intron-(uc008xox.2/11787,-intron-1-of-17)	ENSMUSG00000029207	Apbb2	amyloid-beta-(A4)-precursor-protein-binding,-family-B,-member-2		yes	Hyper
Chr17	39980960	39982111	-0.38738	0.0134547	0.407384	Promoter-(<=1kb)	NA	NA	NA			Hypo
Chr19	44265462	44266657	-0.469905	0.013478	0.407384	Promoter-(<=1kb)	ENSMUSG00000037578	Pkd2l1	polycystic-kidney-disease-2-like-1			Hypo
Chr2	93647594	93648682	0.447139	0.0134939	0.407384	Intron-(uc008lge.2/14043,-intron-4-of-11)	ENSMUSG00000027198	Ext2	exostoses-(multiple)-2			Hyper
Chr13	102774596	102775711	0.487907	0.0135002	0.407384	Distal-Intergenic	NA	NA	NA			Hyper
Chr11	59197698	59199617	-0.382712	0.0135168	0.407384	Distal-Intergenic	NA	NA	NA			Hypo
Chr1	189093569	189094719	0.408275	0.0135226	0.407384	Intron-(uc007dzy.2/67769,-intron-5-of-9)	ENSMUSG00000039210	Gpatch2	G-patch-domain-containing-2			Hyper
Chr11	95504323	95506472	-0.388161	0.013538	0.407384	Distal-Intergenic	NA	NA	NA			Hypo
Chr5	136370415	136371428	-0.634301	0.0135464	0.407384	Distal-Intergenic	NA	NA	NA			Hypo
Chr18	45833470	45834778	-0.427214	0.0135981	0.408506	Intron-(uc008evd.1/140492,-intron-8-of-10)	ENSMUSG00000054477	Kcnn2	potassium-intermediate/small-conductance-calcium-activated-channel,-subfamily-N,-member-2		yes	Hypo
Chr6	38077889	38079025	-0.362802	0.0136153	0.408564	3'-UTR	ENSMUSG00000038600	Atp6v0a4	ATPase,-H+-transporting,-lysosomal-V0-subunit-A4			Hypo
Chr3	9071167	9073258	-0.359027	0.0136363	0.408564	Distal-Intergenic	NA	NA	NA			Hypo
Chr10	10932607	10933655	-0.522072	0.0136433	0.408564	3'-UTR	ENSMUSG00000090112	Shprh	SNF2-histone-linker-PHD-RING-helicase		yes	Hypo
Chr3	105000162	105001208	-0.49163	0.0136939	0.409645	Distal-Intergenic	NA	NA	NA			Hypo
Chr2	35575012	35576646	-0.362296	0.0137305	0.410004	Exon-(uc008jkx.2/69601,-exon-12-of-17)	ENSMUSG00000026883	Dab2ip	disabled-2-interacting-protein		yes	Hypo
Chr14	47693915	47695249	-0.395041	0.0137348	0.410004	Intron-(uc007thn.2/74480,-intron-7-of-12)	ENSMUSG00000021838	Samd4	sterile-alpha-motif-domain-containing-4			Hypo
Chr11	69852198	69853240	0.394257	0.0137512	0.410062	Exon-(uc007jtp.2/13385,-exon-9-of-20)	ENSMUSG00000020884	Asgr1	asialoglycoprotein-receptor-1			Hyper
Chr16	7224039	7225091	0.487533	0.0137773	0.410408	Exon-(uc007ycb.2/268859,-exon-5-of-16)	ENSMUSG00000008658	Rbfox1	RNA-binding-protein,-fox-1-homolog-(C.-elegans)-1	yes	yes	Hyper
Chr8	114414207	114415323	0.397396	0.0138316	0.410656	5'-UTR	ENSMUSG00000031953	Tmem170	transmembrane-protein-170			Hyper
Chr11	87533703	87534800	-0.460969	0.0138469	0.410656	Intron-(uc007kud.1/207742,-intron-2-of-5)	ENSMUSG00000034177	Rnf43	ring-finger-protein-43			Hypo
Chr12	52157453	52159635	0.319175	0.0138486	0.410656	Distal-Intergenic	NA	NA	NA			Hyper
Chr1	73577635	73578705	0.451835	0.013874	0.410656	Distal-Intergenic	NA	NA	NA			Hyper
Chr1	173957999	173959749	0.416527	0.0138859	0.410656	Promoter-(<=1kb)	ENSMUSG00000026556	Vangl2	VANGL-planar-cell-polarity-2			Hyper
Chr2	156526471	156527501	0.385602	0.0138885	0.410656	Promoter-(<=1kb)	ENSMUSG00000061689	Dlgap4	DLG-associated-protein-4			Hyper
Chr9	120447628	120448646	-0.466915	0.0139059	0.410656	Promoter-(<=1kb)	ENSMUSG00000041608	Entpd3	ectonucleoside-triphosphate-diphosphohydrolase-3			Hypo
Chr16	34250591	34252011	0.411677	0.0139127	0.410656	Intron-(uc012aew.1/545156,-intron-13-of-59)	ENSMUSG00000061751	Kalrn	kalirin,-RhoGEF-kinase		yes	Hyper
Chr14	14141167	14142372	0.535593	0.0139262	0.410656	Intron-(uc007sfy.2/72003,-intron-2-of-5)	ENSMUSG00000056296	Synpr	synaptoporin			Hyper
Chr8	101669993	101671017	0.477513	0.0139374	0.410656	Exon-(uc009mzp.1/uc009mzp.1,-exon-3-of-3)	ENSMUSG00000036510	Cdh8	cadherin-8			Hyper
Chr16	30656756	30657844	0.39969	0.0139671	0.410656	Distal-Intergenic	NA	NA	NA			Hyper
Chr12	113012186	113013385	0.351817	0.0139735	0.410656	Exon-(uc007pdv.1/16593,-exon-3-of-14)	ENSMUSG00000021288	Klc1	kinesin-light-chain-1		yes	Hyper
Chr1	34134256	34135391	0.574972	0.0139742	0.410656	Intron-(uc007aof.1/13518,-intron-4-of-16)	ENSMUSG00000026131	Dst	dystonin	yes	yes	Hyper
Chr6	22105461	22106485	0.569841	0.0139886	0.410656	Intron-(uc009bav.1/214642,-intron-15-of-21)	ENSMUSG00000029671	Wnt16	wingless-type-MMTV-integration-site-family,-member-16		yes	Hyper
Chr1	189505990	189507163	-0.462234	0.0140128	0.410735	Intron-(uc007eaa.1/26381,-intron-1-of-7)	ENSMUSG00000026610	Esrrg	estrogen-related-receptor-gamma		yes	Hypo
Chr16	11426172	11427240	-0.379817	0.0140203	0.410735	Intron-(uc007yfi.2/74478,-intron-4-of-10)	ENSMUSG00000071669	Snx29	sorting-nexin-29		yes	Hypo
Chr1	133016368	133017676	-0.385759	0.0141002	0.410825	Distal-Intergenic	NA	NA	NA			Hypo
Chr12	3236064	3237133	-0.468429	0.0141047	0.410825	Promoter-(<=1kb)	ENSMUSG00000079179	Rab10os	RAB10,-member-RAS-oncogene-family,-opposite-strand			Hypo
Chr13	108292239	108293405	-0.500948	0.0141174	0.410825	Distal-Intergenic	NA	NA	NA			Hypo
Chr6	146595605	146596617	-0.51043	0.0141214	0.410825	Promoter-(<=1kb)	NA	Gm6654	predicted-pseudogene-6654			Hypo
Chr16	9761090	9762658	0.413807	0.0141286	0.410825	Exon-(uc007ydc.1/14811,-exon-2-of-12)	ENSMUSG00000059003	Grin2a	glutamate-receptor,-ionotropic,-NMDA2A-(epsilon-1)		yes	Hyper
Chr1	189476770	189478135	0.372615	0.0141331	0.410825	Intron-(uc007eaa.1/26381,-intron-1-of-7)	ENSMUSG00000026610	Esrrg	estrogen-related-receptor-gamma		yes	Hyper
Chr10	98892287	98893599	0.441922	0.0141358	0.410825	Distal-Intergenic	NA	NA	NA			Hyper
Chr11	60187652	60189014	0.442326	0.0141394	0.410825	Exon-(uc007jfu.1/74665,-exon-7-of-14)	ENSMUSG00000056598	Drc3	dynein-regulatory-complex-subunit-3			Hyper
Chr2	16469272	16470405	0.546036	0.0141607	0.411024	Exon-(uc008ikz.1/67448,-exon-3-of-14)	ENSMUSG00000026748	Plxdc2	plexin-domain-containing-2			Hyper
Chr17	43463857	43465039	-0.562532	0.0141767	0.411068	Distal-Intergenic	NA	NA	NA			Hypo
Chr5	23961058	23962258	-0.459395	0.0142318	0.411474	Intron-(uc008wru.1/213990,-intron-1-of-8)	ENSMUSG00000023353	Agap3	ArfGAP-with-GTPase-domain,-ankyrin-repeat-and-PH-domain-3		yes	Hypo
Chr12	73209651	73211075	-0.393154	0.0142434	0.411474	Exon-(uc007nvh.2/73936,-exon-17-of-21)	ENSMUSG00000005078	Jkamp	JNK1/MAPK8-associated-membrane-protein		yes	Hypo
Chr2	90311831	90313127	0.376703	0.0142531	0.411474	Intron-(uc008ksu.2/19271,-intron-2-of-25)	ENSMUSG00000025314	Ptprj	protein-tyrosine-phosphatase,-receptor-type,-J			Hyper
Chr3	94166352	94167726	-0.429331	0.0142672	0.411474	Promoter-(<=1kb)	ENSMUSG00000091648	C2cd4d	C2-calcium-dependent-domain-containing-4D			Hypo
Chr11	71842515	71843604	0.448543	0.0142831	0.411474	3'-UTR	ENSMUSG00000040554	Aipl1	aryl-hydrocarbon-receptor-interacting-protein-like-1			Hyper
Chr7	133455997	133457011	0.551274	0.0142977	0.411474	Distal-Intergenic	NA	NA	NA			Hyper
Chr10	49450854	49452623	0.43281	0.0143	0.411474	Intron-(uc007fag.2/14806,-intron-2-of-17)	ENSMUSG00000056073	Grik2	glutamate-receptor,-ionotropic,-kainate-2-(beta-2)		yes	Hyper
Chr13	91702276	91703719	0.403781	0.0143094	0.411474	Intron-(uc007rjt.2/66970,-intron-3-of-3)	ENSMUSG00000003992	Ssbp2	single-stranded-DNA-binding-protein-2			Hyper
Chr2	167546864	167548270	-0.366689	0.014327	0.411474	Distal-Intergenic	NA	NA	NA			Hypo
Chr15	91458894	91460053	0.595797	0.014336	0.411474	Distal-Intergenic	NA	NA	NA			Hyper
Chr11	49925089	49926408	0.383644	0.0143704	0.411814	Intron-(uc007irn.1/59044,-intron-7-of-7)	ENSMUSG00000036644	Tbc1d9b	TBC1-domain-family,-member-9B			Hyper
Chr11	5193607	5194763	-0.458183	0.0143769	0.411814	Intron-(uc007hwj.2/407821,-intron-2-of-8)	ENSMUSG00000020393	Kremen1	kringle-containing-transmembrane-protein-1		yes	Hypo
Chr7	53492794	53493892	-0.414319	0.01442	0.412404	Promoter-(<=1kb)	ENSMUSG00000030838	Ush1c	USH1-protein-network-component-harmonin			Hypo
Chr5	65140544	65141656	0.487858	0.0144432	0.412404	Distal-Intergenic	NA	NA	NA			Hyper
Chr10	61301713	61302797	-0.543045	0.0144557	0.412404	Intron-(uc007fgn.1/12817,-intron-40-of-40)	ENSMUSG00000058806	Col13a1	collagen,-type-XIII,-alpha-1			Hypo
Chr2	78685196	78686455	-0.468449	0.0144558	0.412404	Distal-Intergenic	NA	NA	NA			Hypo
Chr3	131352611	131353685	0.536134	0.0144989	0.412876	Distal-Intergenic	NA	NA	NA			Hyper
Chr19	24410636	24411681	0.56982	0.0145015	0.412876	Intron-(uc008hap.1/18719,-intron-13-of-14)	ENSMUSG00000059363	Fxn	frataxin		yes	Hyper
Chr13	114052281	114053333	-0.463135	0.0145355	0.413401	Distal-Intergenic	NA	NA	NA			Hypo
Chr1	188454517	188455530	0.433419	0.0145505	0.413401	Exon-(uc007dzo.2/21808,-exon-5-of-7)	ENSMUSG00000039239	Tgfb2	transforming-growth-factor,-beta-2		yes	Hyper
Chr10	98872037	98873095	0.566352	0.0145637	0.413401	Intron-(uc007gxm.1/uc007gxm.1,-intron-2-of-2)	ENSMUSG00000019960	Dusp6	dual-specificity-phosphatase-6		yes	Hyper
Chr7	135783749	135785629	0.336217	0.0146216	0.41429	Intron-(uc009jzc.1/101490,-intron-2-of-19)	ENSMUSG00000042105	Inpp5f	inositol-polyphosphate-5-phosphatase-F		yes	Hyper
Chr4	56017149	56018199	0.503928	0.014631	0.41429	Distal-Intergenic	NA	NA	NA			Hyper
Chr10	96774297	96775479	0.520987	0.014658	0.41429	Distal-Intergenic	NA	NA	NA			Hyper
Chr10	6202973	6204050	0.480642	0.0146689	0.41429	Intron-(uc011wzu.1/270685,-intron-26-of-27)	ENSMUSG00000038587	Akap12	A-kinase-(PRKA)-anchor-protein-(gravin)-12			Hyper
Chr9	72517329	72518406	0.383932	0.0146707	0.41429	Promoter-(<=1kb)	ENSMUSG00000032216	Nedd4	neural-precursor-cell-expressed,-developmentally-down-regulated-4		yes	Hyper
Chr12	71133358	71134370	-0.514487	0.0146977	0.41429	Intron-(uc007ntf.1/18080,-intron-20-of-28)	ENSMUSG00000021067	Sav1	salvador-family-WW-domain-containing-1			Hypo
Chr11	94305285	94306404	-0.368739	0.0147088	0.41429	Promoter-(<=1kb)	ENSMUSG00000020866	Cacna1g	calcium-channel,-voltage-dependent,-T-type,-alpha-1G-subunit			Hypo
Chr8	108386690	108388419	0.37315	0.014712	0.41429	Promoter-(2-3kb)	ENSMUSG00000008450	Nutf2	nuclear-transport-factor-2		yes	Hyper
Chr2	25288296	25289312	-0.418126	0.014731	0.414414	Exon-(uc008isc.1/11305,-exon-3-of-48)	ENSMUSG00000026944	Abca2	ATP-binding-cassette,-sub-family-A-(ABC1),-member-2			Hypo
Chr6	91332179	91333639	0.419396	0.0147481	0.414482	Intron-(uc009cxz.1/22421,-intron-3-of-3)	ENSMUSG00000030093	Wnt7a	wingless-type-MMTV-integration-site-family,-member-7A		yes	Hyper
Chr7	100085289	100086837	-0.536294	0.0147958	0.414876	Distal-Intergenic	NA	NA	NA			Hypo
Chr5	37256943	37258476	-0.552231	0.0148034	0.414876	Promoter-(1-2kb)	ENSMUSG00000029120	Ppp2r2c	protein-phosphatase-2,-regulatory-subunit-B,-gamma		yes	Hypo
Chr18	52925698	52926913	-0.39239	0.0148082	0.414876	Promoter-(<=1kb)	ENSMUSG00000024534	Sncaip	synuclein,-alpha-interacting-protein-(synphilin)			Hypo
Chr2	106813265	106814285	-0.45042	0.0148346	0.414876	Promoter-(<=1kb)	ENSMUSG00000027122	Arl14ep	ADP-ribosylation-factor-like-14-effector-protein			Hypo
Chr5	33579690	33581176	-0.393616	0.0148356	0.414876	Distal-Intergenic	NA	NA	NA			Hypo
Chr17	30135415	30136514	0.406319	0.0148499	0.414876	Distal-Intergenic	NA	NA	NA			Hyper
Chr8	124792478	124793580	-0.353536	0.0148764	0.415206	Distal-Intergenic	NA	NA	NA			Hypo
Chr2	59048047	59049121	0.487044	0.0148988	0.415422	Intron-(uc008jsz.1/227937,-intron-1-of-14)	ENSMUSG00000026991	Pkp4	plakophilin-4		yes	Hyper
Chr16	30086002	30087458	-0.417877	0.0149589	0.416041	Distal-Intergenic	NA	NA	NA			Hypo
Chr16	5312112	5313464	-0.470347	0.0149912	0.416041	Distal-Intergenic	NA	NA	NA			Hypo
Chr13	19063174	19064220	0.642021	0.0149928	0.416041	Intron-(uc007pol.1/218038,-intron-1-of-8)	ENSMUSG00000021314	Amph	amphiphysin		yes	Hyper
Chr1	129328367	129329894	0.39664	0.0149996	0.416041	Intron-(uc007ckr.1/107895,-intron-12-of-17)	ENSMUSG00000036155	Mgat5	mannoside-acetylglucosaminyltransferase-5		yes	Hyper
Chr1	6757564	6759262	0.520014	0.0150312	0.416041	Exon-(uc007afw.1/240690,-exon-5-of-24)	ENSMUSG00000033740	St18	suppression-of-tumorigenicity-18			Hyper
Chr5	86136271	86137377	0.465625	0.0150389	0.416041	Distal-Intergenic	NA	NA	NA			Hyper
Chr6	21321550	21322908	0.482397	0.0150504	0.416041	Intron-(uc009baq.1/16508,-intron-1-of-5)	ENSMUSG00000060882	Kcnd2	potassium-voltage-gated-channel,-Shal-related-family,-member-2			Hyper
Chr6	119081426	119082476	-0.441168	0.0150666	0.416041	Intron-(uc009dlu.2/12288,-intron-1-of-46)	ENSMUSG00000051331	Cacna1c	calcium-channel,-voltage-dependent,-L-type,-alpha-1C-subunit	yes	yes	Hypo
Chr2	48796535	48797904	0.442084	0.0150746	0.416041	Intron-(uc008jpp.2/26428,-intron-1-of-13)	ENSMUSG00000026761	Orc4	origin-recognition-complex,-subunit-4		yes	Hyper
Chr16	32997003	32998112	0.578616	0.0150812	0.416041	Exon-(uc007yzs.1/70144,-exon-18-of-21)	ENSMUSG00000035578	Iqcg	IQ-motif-containing-G			Hyper
Chr14	28740936	28742377	0.534326	0.0150892	0.416041	Intron-(uc007stz.1/238988,-intron-7-of-12)	ENSMUSG00000040640	Erc2	ELKS/RAB6-interacting/CAST-family-member-2		yes	Hyper
Chr8	67124601	67125685	0.408087	0.015109	0.416041	Intron-(uc009luw.1/12876,-intron-1-of-8)	ENSMUSG00000037852	Cpe	carboxypeptidase-E		yes	Hyper
Chr10	91471808	91473117	0.422237	0.0151228	0.416041	Distal-Intergenic	NA	NA	NA			Hyper
Chr13	64045160	64047121	-0.376884	0.0151436	0.416041	Distal-Intergenic	NA	NA	NA			Hypo
Chr6	28745500	28746533	0.391324	0.0151553	0.416041	Exon-(uc012eiu.1/56463,-exon-15-of-17)	ENSMUSG00000049939	Lrrc4	leucine-rich-repeat-containing-4			Hyper
Chr6	145652592	145653814	0.468079	0.0151594	0.416041	Distal-Intergenic	NA	NA	NA			Hyper
Chr17	30918898	30919915	-0.435884	0.0151973	0.416041	Exon-(uc008bua.1/13417,-exon-71-of-83)	ENSMUSG00000033826	Dnah8	dynein,-axonemal,-heavy-chain-8			Hypo
Chr6	33504911	33506582	0.369607	0.0152254	0.416041	Intron-(uc009bgs.1/20336,-intron-9-of-9)	ENSMUSG00000029763	Exoc4	exocyst-complex-component-4		yes	Hyper
Chr2	92792994	92794176	-0.40406	0.0152408	0.416041	3'-UTR	ENSMUSG00000027220	Syt13	synaptotagmin-XIII			Hypo
Chr8	12476888	12478138	-0.449562	0.0152602	0.416041	Distal-Intergenic	NA	NA	NA			Hypo
Chr12	113793828	113795564	-0.343046	0.0152727	0.416041	Distal-Intergenic	NA	NA	NA			Hypo
Chr4	81227154	81228388	0.498086	0.015287	0.416041	Distal-Intergenic	NA	NA	NA			Hyper
Chr15	79658307	79659845	-0.342707	0.015302	0.416041	3'-UTR	ENSMUSG00000089715	Cbx6	chromobox-6		yes	Hypo
Chr12	56701305	56702403	-0.415458	0.0153126	0.416041	Promoter-(1-2kb)	ENSMUSG00000045440	Insm2	insulinoma-associated-2			Hypo
Chr17	67977272	67979045	0.336586	0.015325	0.416041	Downstream-(1-2kb)	ENSMUSG00000073375	Lrrc30	leucine-rich-repeat-containing-30			Hyper
Chr2	128036650	128038320	0.36591	0.0153399	0.416041	Distal-Intergenic	NA	NA	NA			Hyper
Chr9	83620126	83621218	0.496518	0.0153487	0.416041	Distal-Intergenic	NA	NA	NA			Hyper
Chr11	108779608	108780790	0.554995	0.0153609	0.416041	Promoter-(<=1kb)	ENSMUSG00000000142	Axin2	axin-2		yes	Hyper
Chr12	45674412	45675500	-0.566616	0.0153746	0.416041	Promoter-(2-3kb)	ENSMUSG00000020598	Nrcam	neuronal-cell-adhesion-molecule		yes	Hypo
Chr2	167363909	167364941	-0.434741	0.0154068	0.416041	Promoter-(<=1kb)	ENSMUSG00000042821	Snai1	snail-family-zinc-finger-1		yes	Hypo
Chr13	110916444	110917671	0.41215	0.0154142	0.416041	Intron-(uc007rvo.2/67295,-intron-3-of-4)	ENSMUSG00000021700	Rab3c	RAB3C,-member-RAS-oncogene-family			Hyper
Chr5	114045397	114046867	0.405734	0.0154455	0.416041	Distal-Intergenic	NA	NA	NA			Hyper
Chr4	53094388	53095511	0.441908	0.0154697	0.416041	Exon-(uc008swu.1/11303,-exon-16-of-50)	ENSMUSG00000015247	Nipsnap3b	nipsnap-homolog-3B			Hyper
Chr2	147529253	147530354	0.550975	0.0154763	0.416041	Distal-Intergenic	NA	NA	NA			Hyper
Chr10	59853988	59855065	0.392184	0.0154776	0.416041	Exon-(uc007fev.1/22295,-exon-30-of-69)	ENSMUSG00000090439	Gm17455	predicted-gene,-17455			Hyper
Chr4	144894388	144895589	0.547793	0.0154796	0.416041	Intron-(uc008vrv.1/21941,-intron-1-of-12)	ENSMUSG00000028602	Tnfrsf8	tumor-necrosis-factor-receptor-superfamily,-member-8			Hyper
Chr13	98284332	98285361	0.434358	0.0154966	0.416041	Distal-Intergenic	NA	NA	NA			Hyper
Chr10	120125226	120126396	0.518449	0.0154989	0.416041	Distal-Intergenic	NA	NA	NA			Hyper
Chr9	68511133	68512394	0.395247	0.0155055	0.416041	3'-UTR	ENSMUSG00000032238	Rora	RAR-related-orphan-receptor-alpha		yes	Hyper
Chr12	118975809	118976858	-0.549445	0.0155085	0.416041	Intron-(uc007pib.2/217944,-intron-22-of-27)	ENSMUSG00000021175	Cdca7l	cell-division-cycle-associated-7-like		yes	Hypo
Chr6	145550246	145551301	0.494023	0.0155299	0.416193	Intron-(uc009erk.1/74071,-intron-1-of-10)	ENSMUSG00000054966	Lmntd1	lamin-tail-domain-containing-1			Hyper
Chr7	120681153	120682344	0.609359	0.0155544	0.416193	Exon-(uc009jhr.1/uc009jhr.1,-exon-6-of-6)	ENSMUSG00000030759	Far1	fatty-acyl-CoA-reductase-1			Hyper
Chr18	70025690	70026740	-0.564236	0.0155582	0.416193	Distal-Intergenic	NA	NA	NA			Hypo
Chr1	134440078	134441323	0.472231	0.0156375	0.416655	Promoter-(<=1kb)	ENSMUSG00000053024	Cntn2	contactin-2		yes	Hyper
Chr15	82180399	82181449	-0.421085	0.0156796	0.416655	3'-UTR	ENSMUSG00000022450	Ndufa6	NADH:ubiquinone-oxidoreductase-subunit-A6		yes	Hypo
Chr1	23122174	23123205	0.462155	0.0156932	0.416655	Distal-Intergenic	NA	NA	NA			Hyper
Chr4	151491223	151492392	-0.37184	0.0157053	0.416655	Promoter-(<=1kb)	ENSMUSG00000024793	Tnfrsf25	tumor-necrosis-factor-receptor-superfamily,-member-25			Hypo
Chr8	60239700	60241059	-0.578435	0.0157106	0.416655	Distal-Intergenic	NA	NA	NA			Hypo
Chr1	134036666	134037668	0.566387	0.0157195	0.416655	Promoter-(<=1kb)	ENSMUSG00000026437	Cdk18	cyclin-dependent-kinase-18			Hyper
Chr11	94747996	94749186	-0.534186	0.0157375	0.416655	Exon-(uc007kzm.1/uc007kzm.1,-exon-2-of-6)	ENSMUSG00000001506	Col1a1	collagen,-type-I,-alpha-1		yes	Hypo
Chr8	119699482	119700865	-0.378124	0.015743	0.416655	Intron-(uc009nox.1/209239,-intron-1-of-10)	ENSMUSG00000052557	Gan	giant-axonal-neuropathy			Hypo
Chr10	41200499	41201621	-0.316398	0.015747	0.416655	Promoter-(2-3kb)	ENSMUSG00000019823	Mical1	microtubule-associated-monooxygenase,-calponin-and-LIM-domain-containing-1			Hypo
Chr1	95339402	95340441	0.487734	0.015763	0.416655	Promoter-(1-2kb)	ENSMUSG00000034088	Hdlbp	high-density-lipoprotein-(HDL)-binding-protein		yes	Hyper
Chr7	4078561	4079774	-0.506184	0.0157665	0.416655	Exon-(uc009eww.2/57776,-exon-5-of-14)	ENSMUSG00000030428	Ttyh1	tweety-family-member-1			Hypo
Chr17	64834344	64835761	0.369226	0.0157728	0.416655	Distal-Intergenic	NA	NA	NA			Hyper
Chr2	18259418	18261217	0.368858	0.0157747	0.416655	Intron-(uc008ilt.2/13418,-intron-1-of-12)	ENSMUSG00000026740	Dnajc1	DnaJ-heat-shock-protein-family-(Hsp40)-member-C1		yes	Hyper
Chr9	45215315	45216323	-0.416535	0.0157814	0.416655	Promoter-(1-2kb)	ENSMUSG00000059412	Fxyd2	FXYD-domain-containing-ion-transport-regulator-2			Hypo
Chr3	107127557	107128778	0.36612	0.0158346	0.41692	Downstream-(<1kb)	ENSMUSG00000048109	Rbm15	RNA-binding-motif-protein-15			Hyper
Chr17	45806485	45808123	-0.345271	0.01584	0.41692	Exon-(uc012auh.1/224807,-exon-11-of-24)	ENSMUSG00000058626	Capn11	calpain-11			Hypo
Chr8	112082892	112084004	-0.492047	0.0158499	0.41692	Exon-(uc009nij.1/64340,-exon-7-of-27)	ENSMUSG00000037993	Dhx38	DEAH-(Asp-Glu-Ala-His)-box-polypeptide-38			Hypo
Chr5	128106945	128108596	-0.456609	0.0158634	0.41692	Distal-Intergenic	NA	NA	NA			Hypo
Chr4	128970292	128971711	0.321377	0.0158672	0.41692	Promoter-(<=1kb)	ENSMUSG00000001333	Sync	syncoilin		yes	Hyper
Chr14	52690222	52691956	0.368526	0.0158797	0.41692	Promoter-(1-2kb)	ENSMUSG00000064871	Snord58b	small-nucleolar-RNA,-C/D-box-58B			Hyper
Chr6	119059319	119060350	-0.629498	0.015909	0.417301	Promoter-(1-2kb)	ENSMUSG00000051331	Cacna1c	calcium-channel,-voltage-dependent,-L-type,-alpha-1C-subunit	yes	yes	Hypo
Chr9	115022884	115023921	-0.427166	0.0159606	0.418267	Intron-(uc009ryl.1/74486,-intron-4-of-11)	ENSMUSG00000040875	Osbpl10	oxysterol-binding-protein-like-10			Hypo
Chr4	114223638	114224747	-0.503885	0.0159991	0.418888	Intron-(uc008ueb.1/666048,-intron-2-of-6)	ENSMUSG00000070867	Trabd2b	TraB-domain-containing-2B			Hypo
Chr6	83747231	83748538	0.487529	0.0160311	0.419339	Promoter-(2-3kb)	ENSMUSG00000034744	Nagk	N-acetylglucosamine-kinase			Hyper
Chr13	54171631	54173041	0.334527	0.0160611	0.419737	Intron-(uc007qoa.2/14057,-intron-1-of-10)	ENSMUSG00000021474	Sfxn1	sideroflexin-1			Hyper
Chr9	20695427	20696812	-0.35254	0.0160975	0.4203	Promoter-(2-3kb)	ENSMUSG00000004100	Ppan	peter-pan-homolog			Hypo
Chr17	78990574	78992035	0.375277	0.016132	0.420812	Intron-(uc008dox.2/74199,-intron-7-of-13)	ENSMUSG00000024076	Vit	vitrin			Hyper
Chr2	74838251	74839272	0.417801	0.0161863	0.421375	Distal-Intergenic	NA	NA	NA			Hyper
Chr18	64610061	64611104	-0.465215	0.016193	0.421375	Distal-Intergenic	NA	NA	NA			Hypo
Chr16	24859625	24861673	0.397765	0.0161982	0.421375	Intron-(uc007yue.2/210126,-intron-9-of-12)	ENSMUSG00000033306	Lpp	LIM-domain-containing-preferred-translocation-partner-in-lipoma	yes	yes	Hyper
Chr9	115943503	115944911	-0.393531	0.016245	0.421415	Intron-(uc009ryr.2/73748,-intron-14-of-14)	ENSMUSG00000056880	Gadl1	glutamate-decarboxylase-like-1		yes	Hypo
Chr5	32463442	32464484	-0.556855	0.0162482	0.421415	Distal-Intergenic	NA	NA	NA			Hypo
Chr1	36606033	36607394	-0.340508	0.0162622	0.421415	Promoter-(1-2kb)	ENSMUSG00000079610	Ankrd39	ankyrin-repeat-domain-39			Hypo
Chr1	136830613	136832088	-0.392844	0.0162651	0.421415	Intron-(uc007csm.1/329251,-intron-1-of-24)	ENSMUSG00000073557	Ppp1r12b	protein-phosphatase-1,-regulatory-subunit-12B		yes	Hypo
Chr5	113353621	113354937	-0.530411	0.0162851	0.421415	Exon-(uc008ytt.1/320129,-exon-16-of-21)	ENSMUSG00000072720	Myo18b	myosin-XVIIIb		yes	Hypo
Chr3	55098800	55099981	-0.553396	0.0163039	0.421415	Intron-(uc008pgk.2/13175,-intron-3-of-6)	ENSMUSG00000027797	Dclk1	doublecortin-like-kinase-1		yes	Hypo
Chr2	14979223	14980302	0.467088	0.0163131	0.421415	Promoter-(2-3kb)	ENSMUSG00000017418	Arl5b	ADP-ribosylation-factor-like-5B			Hyper
Chr11	118232781	118234110	-0.391483	0.0163187	0.421415	Distal-Intergenic	NA	NA	NA			Hypo
Chr11	77127504	77128512	0.513493	0.0163462	0.421644	Intron-(uc007kgl.1/237860,-intron-1-of-14)	ENSMUSG00000037926	Ssh2	slingshot-protein-phosphatase-2			Hyper
Chr16	30372471	30373601	0.47064	0.0163689	0.421644	Intron-(uc012aee.1/224088,-intron-2-of-33)	ENSMUSG00000022533	Atp13a3	ATPase-type-13A3			Hyper
Chr2	151764382	151765530	-0.378361	0.0163722	0.421644	Exon-(uc008neq.1/11602,-exon-7-of-9)	ENSMUSG00000027460	Angpt4	angiopoietin-4			Hypo
Chr6	72763265	72764363	-0.48837	0.0164112	0.422264	Distal-Intergenic	NA	NA	NA			Hypo
Chr9	105556588	105557752	-0.434501	0.0164452	0.422713	3'-UTR	ENSMUSG00000032571	Pik3r4	phosphoinositide-3-kinase-regulatory-subunit-4			Hypo
Chr14	52874236	52875458	0.440002	0.0164979	0.422713	Distal-Intergenic	NA	NA	NA			Hyper
Chr9	105513694	105514779	0.494517	0.0165064	0.422713	Distal-Intergenic	NA	NA	NA			Hyper
Chr4	119803935	119805694	0.334702	0.016515	0.422713	Exon-(uc008una.1/16656,-exon-8-of-9)	ENSMUSG00000028635	Edn2	endothelin-2			Hyper
Chr2	64967362	64968741	0.387184	0.0165161	0.422713	Intron-(uc008jwb.2/319876,-intron-4-of-12)	ENSMUSG00000026888	Grb14	growth-factor-receptor-bound-protein-14			Hyper
Chr10	107817413	107818496	-0.399782	0.0165182	0.422713	Intron-(uc007gzf.1/114774,-intron-2-of-6)	ENSMUSG00000035873	Pawr	PRKC,-apoptosis,-WT1,-regulator		yes	Hypo
Chr15	80942279	80943291	0.421204	0.016575	0.423413	Intron-(uc007wwd.1/223701,-intron-2-of-13)	ENSMUSG00000042292	Mkl1	MKL-(megakaryoblastic-leukemia)/myocardin-like-1		yes	Hyper
Chr15	36868882	36870042	-0.442784	0.0165865	0.423413	Distal-Intergenic	NA	NA	NA			Hypo
Chr8	125984890	125985898	-0.576889	0.0165922	0.423413	3'-UTR	ENSMUSG00000031967	Afg3l1	AFG3-like-AAA-ATPase-1			Hypo
Chr18	52623949	52624987	-0.633804	0.0166053	0.423413	Promoter-(<=1kb)	ENSMUSG00000024528	Srfbp1	serum-response-factor-binding-protein-1			Hypo
Chr1	64156286	64157834	0.341263	0.0166264	0.423486	Intron-(uc007bgo.1/93691,-intron-1-of-3)	ENSMUSG00000025959	Klf7	Kruppel-like-factor-7-(ubiquitous)			Hyper
Chr14	67236042	67237335	-0.619652	0.0166381	0.423486	Distal-Intergenic	NA	NA	NA			Hypo
Chr15	98971477	98972943	-0.358276	0.0166665	0.423828	Intron-(uc007xov.1/72572,-intron-1-of-7)	ENSMUSG00000051934	Spats2	spermatogenesis-associated,-serine-rich-2			Hypo
Chr1	164024221	164025287	0.458434	0.0167484	0.425218	Intron-(uc007dfz.1/103967,-intron-4-of-8)	ENSMUSG00000040265	Dnm3	dynamin-3	yes	yes	Hyper
Chr2	66044084	66045165	0.545696	0.0167597	0.425218	Intron-(uc008jwv.1/73668,-intron-22-of-28)	ENSMUSG00000034848	Ttc21b	tetratricopeptide-repeat-domain-21B			Hyper
Chr2	73865815	73866965	0.505123	0.0167668	0.425218	Distal-Intergenic	NA	NA	NA			Hyper
Chr6	34657450	34658779	0.425392	0.0167812	0.425218	Promoter-(<=1kb)	ENSMUSG00000029761	Cald1	caldesmon-1		yes	Hyper
Chr10	40202042	40203044	0.508978	0.0168309	0.425586	3'-UTR	ENSMUSG00000019834	Slc22a16	solute-carrier-family-22-(organic-cation-transporter),-member-16			Hyper
Chr5	138036418	138037437	-0.454596	0.0168393	0.425586	Downstream-(<1kb)	ENSMUSG00000037221	Mospd3	motile-sperm-domain-containing-3			Hypo
Chr16	32679337	32680346	-0.330018	0.0168537	0.425586	Exon-(uc007yzc.2/51789,-exon-12-of-14)	ENSMUSG00000022791	Tnk2	tyrosine-kinase,-non-receptor,-2			Hypo
Chr9	111258138	111259366	-0.460467	0.016858	0.425586	3'-UTR	ENSMUSG00000062296	Trank1	tetratricopeptide-repeat-and-ankyrin-repeat-containing-1		yes	Hypo
Chr11	100214219	100215971	-0.327334	0.0168708	0.425586	Promoter-(1-2kb)	ENSMUSG00000006930	Hap1	huntingtin-associated-protein-1			Hypo
Chr15	84973209	84974247	0.701067	0.0169209	0.426091	Exon-(uc007xcy.2/67747,-exon-7-of-8)	ENSMUSG00000022431	Ribc2	RIB43A-domain-with-coiled-coils-2			Hyper
Chr5	113441327	113442626	0.331634	0.0169346	0.426091	Promoter-(1-2kb)	ENSMUSG00000042249	Grk3	G-protein-coupled-receptor-kinase-3			Hyper
Chr1	130704595	130705710	-0.501505	0.0169359	0.426091	Distal-Intergenic	NA	NA	NA			Hypo
Chr19	6070353	6072070	-0.326353	0.0169918	0.426872	Promoter-(2-3kb)	ENSMUSG00000024799	Tm7sf2	transmembrane-7-superfamily-member-2			Hypo
Chr5	53739043	53740299	-0.362443	0.0169971	0.426872	Distal-Intergenic	NA	NA	NA			Hypo
Chr7	135597934	135598981	0.468845	0.0170351	0.427447	5'-UTR	ENSMUSG00000030846	Tial1	Tia1-cytotoxic-granule-associated-RNA-binding-protein-like-1		yes	Hyper
Chr16	5134350	5135619	-0.434414	0.01708	0.427759	Promoter-(1-2kb)	ENSMUSG00000039457	Ppl	periplakin		yes	Hypo
Chr5	115896612	115897840	-0.382734	0.017086	0.427759	3'-UTR	ENSMUSG00000054256	Msi1	musashi-RNA-binding-protein-1		yes	Hypo
Chr5	136000927	136002410	0.325004	0.0170929	0.427759	Intron-(uc008zyk.2/215114,-intron-1-of-30)	ENSMUSG00000039959	Hip1	huntingtin-interacting-protein-1			Hyper
Chr10	104662254	104663451	0.523708	0.0171567	0.428673	Intron-(uc007gym.1/278279,-intron-11-of-11)	ENSMUSG00000036019	Tmtc2	transmembrane-and-tetratricopeptide-repeat-containing-2			Hyper
Chr4	98962645	98964149	-0.354188	0.0171798	0.428673	Distal-Intergenic	NA	NA	NA			Hypo
Chr1	74169213	74170446	-0.422744	0.0171821	0.428673	Promoter-(<=1kb)	ENSMUSG00000055322	Tns1	tensin-1			Hypo
Chr5	112258078	112259115	-0.490798	0.0171899	0.428673	Distal-Intergenic	NA	NA	NA			Hypo
Chr1	15699214	15700507	0.50457	0.017212	0.428846	Exon-(uc007aje.1/98741,-exon-2-of-2)	ENSMUSG00000025925	Terf1	telomeric-repeat-binding-factor-1		yes	Hyper
Chr13	49461810	49463035	-0.435808	0.0172437	0.429259	Intron-(uc007qjg.1/76895,-intron-2-of-8)	ENSMUSG00000037933	Bicd2	BICD-cargo-adaptor-2			Hypo
Chr1	157476328	157477411	0.756908	0.0172801	0.429787	Intron-(uc011wtw.1/72482,-intron-6-of-7)	ENSMUSG00000033701	Acbd6	acyl-Coenzyme-A-binding-domain-containing-6		yes	Hyper
Chr17	88249460	88251762	0.354349	0.0173051	0.4298	Distal-Intergenic	NA	NA	NA			Hyper
Chr19	14709048	14710275	-0.487223	0.017311	0.4298	Distal-Intergenic	NA	NA	NA			Hypo
Chr15	79630528	79631664	-0.446815	0.0173652	0.430769	Intron-(uc007wul.1/73340,-intron-1-of-4)	ENSMUSG00000022421	Nptxr	neuronal-pentraxin-receptor		yes	Hypo
Chr9	106468451	106469554	-0.465035	0.0173993	0.431042	Downstream-(1-2kb)	ENSMUSG00000041009	Iqcf4	IQ-motif-containing-F4			Hypo
Chr15	57840752	57841797	0.336632	0.0174066	0.431042	3'-UTR	ENSMUSG00000101892	9130401M01Rik	RIKEN-cDNA-9130401M01-gene			Hyper
Chr2	80370987	80372838	0.39529	0.0174298	0.431239	Intron-(uc008khm.1/50884,-intron-15-of-30)	ENSMUSG00000027002	Nckap1	NCK-associated-protein-1	yes		Hyper
Chr7	109208523	109209706	0.530331	0.0174922	0.431907	Intron-(uc009iqg.1/75212,-intron-1-of-8)	ENSMUSG00000070426	Rnf121	ring-finger-protein-121			Hyper
Chr18	36017941	36018959	-0.318318	0.0174952	0.431907	5'-UTR	ENSMUSG00000046668	Cxxc5	CXXC-finger-5			Hypo
Chr3	121331555	121332702	-0.452682	0.0175025	0.431907	Distal-Intergenic	NA	NA	NA			Hypo
Chr13	9755110	9756261	0.498157	0.0175283	0.432166	Intron-(uc007pkx.1/66505,-intron-1-of-14)	ENSMUSG00000021156	Zmynd11	zinc-finger,-MYND-domain-containing-11	yes		Hyper
Chr5	44379951	44381022	-0.699661	0.0175709	0.43284	Distal-Intergenic	NA	NA	NA			Hypo
Chr4	65897380	65898769	0.592604	0.0175929	0.433005	Intron-(uc008thn.1/56079,-intron-2-of-22)	ENSMUSG00000028373	Astn2	astrotactin-2		yes	Hyper
Chr2	128681649	128682858	0.60565	0.0176575	0.434217	Distal-Intergenic	NA	NA	NA			Hyper
Chr10	10896815	10897876	0.534586	0.0177246	0.435171	Intron-(uc007ejo.1/268281,-intron-14-of-20)	ENSMUSG00000090112	Shprh	SNF2-histone-linker-PHD-RING-helicase		yes	Hyper
Chr9	49224244	49225337	0.55257	0.017727	0.435171	3'-UTR	ENSMUSG00000032257	Ankk1	ankyrin-repeat-and-kinase-domain-containing-1		yes	Hyper
Chr13	51993932	51995091	-0.527456	0.0177506	0.435375	Distal-Intergenic	NA	NA	NA			Hypo
Chr8	86869277	86870557	0.450849	0.0178258	0.436233	Distal-Intergenic	NA	NA	NA			Hyper
Chr7	151365193	151366418	-0.519307	0.0178572	0.436233	Exon-(uc009kqe.2/210274,-exon-2-of-16)	ENSMUSG00000037541	Shank2	SH3-and-multiple-ankyrin-repeat-domains-2		yes	Hypo
Chr4	106572480	106573924	-0.430762	0.0178704	0.436233	Distal-Intergenic	NA	NA	NA			Hypo
Chr12	70673813	70674918	0.37658	0.0178774	0.436233	Distal-Intergenic	NA	NA	NA			Hyper
Chr4	4390540	4391601	0.551024	0.017903	0.436233	Distal-Intergenic	NA	NA	NA			Hyper
Chr16	50307351	50308399	0.499196	0.0179067	0.436233	Intron-(uc007zkn.2/70508,-intron-1-of-14)	ENSMUSG00000022641	Bbx	bobby-sox-HMG-box-containing			Hyper
Chr6	11925611	11926622	0.555722	0.0179077	0.436233	Intron-(uc009ayf.1/75725,-intron-7-of-15)	ENSMUSG00000029629	Phf14	PHD-finger-protein-14			Hyper
Chr8	114438691	114440216	-0.360912	0.0179239	0.436233	Exon-(uc009nna.1/234740,-exon-5-of-7)	ENSMUSG00000031952	Chst5	carbohydrate-(N-acetylglucosamine-6-O)-sulfotransferase-5			Hypo
Chr5	25131731	25132779	0.482338	0.0179242	0.436233	Distal-Intergenic	NA	NA	NA			Hyper
Chr6	85014904	85016020	0.522665	0.0179661	0.436877	Intron-(uc009cpa.2/75914,-intron-1-of-21)	ENSMUSG00000033769	Exoc6b	exocyst-complex-component-6B			Hyper
Chr8	117419653	117421087	-0.351407	0.0179956	0.437172	Intron-(uc009nod.2/80707,-intron-8-of-8)	ENSMUSG00000004637	Wwox	WW-domain-containing-oxidoreductase	yes	yes	Hypo
Chr17	64032062	64033132	-0.529423	0.0180223	0.437172	Distal-Intergenic	NA	NA	NA			Hypo
Chr5	67802351	67803733	-0.423319	0.0180405	0.437172	Intron-(uc012dws.1/666938,-intron-2-of-4)	ENSMUSG00000092060	Bend4	BEN-domain-containing-4			Hypo
Chr13	9701600	9702923	0.395098	0.0180622	0.437172	Intron-(uc007pkx.1/66505,-intron-4-of-14)	ENSMUSG00000021156	Zmynd11	zinc-finger,-MYND-domain-containing-11	yes		Hyper
Chr14	118192322	118193397	-0.414469	0.0180766	0.437172	Intron-(uc007uyk.1/23888,-intron-4-of-9)	ENSMUSG00000022129	Dct	dopachrome-tautomerase		yes	Hypo
Chr4	34376306	34378159	0.353507	0.0180798	0.437172	Distal-Intergenic	NA	NA	NA			Hyper
Chr5	115061171	115062491	-0.315543	0.0181339	0.437172	3'-UTR	ENSMUSG00000014158	Trpv4	transient-receptor-potential-cation-channel,-subfamily-V,-member-4		yes	Hypo
Chr7	86976410	86977480	-0.532753	0.0181346	0.437172	Intron-(uc009hzd.1/16790,-intron-14-of-19)	ENSMUSG00000039062	Anpep	alanyl-(membrane)-aminopeptidase		yes	Hypo
Chr5	23493260	23494319	0.403928	0.018161	0.437172	Exon-(uc008wqu.1/84652,-exon-4-of-11)	ENSMUSG00000028995	Fam126a	family-with-sequence-similarity-126,-member-A		yes	Hyper
Chr2	65861852	65863031	0.440452	0.0181613	0.437172	3'-UTR	ENSMUSG00000044647	Csrnp3	cysteine-serine-rich-nuclear-protein-3			Hyper
Chr15	37833264	37834352	-0.433551	0.018182	0.437172	Distal-Intergenic	NA	NA	NA			Hypo
Chr4	141055054	141056624	0.29667	0.018185	0.437172	Intron-(uc008von.1/56381,-intron-3-of-15)	ENSMUSG00000040761	Spen	spen-family-transcription-repressor			Hyper
Chr3	50081011	50082274	0.453147	0.0181898	0.437172	Distal-Intergenic	NA	NA	NA			Hyper
Chr11	100874429	100875683	0.348898	0.0181943	0.437172	Promoter-(1-2kb)	ENSMUSG00000019302	Atp6v0a1	ATPase,-H+-transporting,-lysosomal-V0-subunit-A1		yes	Hyper
Chr18	5687053	5688385	0.389856	0.0182693	0.437944	Intron-(uc008dyx.1/21417,-intron-1-of-1)	ENSMUSG00000024238	Zeb1	zinc-finger-E-box-binding-homeobox-1		yes	Hyper
Chr19	7000099	7001299	-0.387222	0.0182917	0.437944	Promoter-(<=1kb)	ENSMUSG00000050623	Catsperz	cation-channel-sperm-associated-auxiliary-subunit-zeta			Hypo
Chr6	17147251	17148349	-0.48697	0.0182984	0.437944	Exon-(uc009azk.1/uc009azk.1,-exon-1-of-3)	ENSMUSG00000000058	Cav2	caveolin-2		yes	Hypo
Chr2	26322865	26324227	-0.335654	0.0183235	0.437944	Promoter-(<=1kb)	ENSMUSG00000026923	Notch1	notch-1		yes	Hypo
Chr2	28641755	28642922	-0.452056	0.0183334	0.437944	Intron-(uc008izd.1/68870,-intron-11-of-12)	ENSMUSG00000092832	Mir3088	microRNA-3088			Hypo
Chr2	49372769	49374088	0.39519	0.018346	0.437944	Intron-(uc008jpw.2/227867,-intron-3-of-13)	ENSMUSG00000069495	Epc2	enhancer-of-polycomb-homolog-2			Hyper
Chr5	147796574	147797612	-0.368294	0.0183564	0.437944	Distal-Intergenic	NA	NA	NA			Hypo
Chr5	122176522	122177626	0.406932	0.0183888	0.437944	Intron-(uc008zke.1/20239,-intron-1-of-24)	ENSMUSG00000042605	Atxn2	ataxin-2		yes	Hyper
Chr1	140992316	140993473	0.505309	0.018394	0.437944	Intron-(uc007cwb.2/329260,-intron-12-of-21)	ENSMUSG00000056268	Dennd1b	DENN/MADD-domain-containing-1B			Hyper
Chr1	133883671	133884701	-0.489312	0.0184422	0.437944	Distal-Intergenic	NA	NA	NA			Hypo
Chr3	96267573	96268604	-0.520044	0.0184536	0.437944	Distal-Intergenic	NA	NA	NA			Hypo
Chr5	34264221	34265262	-0.514878	0.0184629	0.437944	Exon-(uc008xbn.1/24116,-exon-2-of-11)	ENSMUSG00000029111	Nelfa	negative-elongation-factor-complex-member-A,-Whsc2			Hypo
Chr6	117861738	117863362	-0.414612	0.0184711	0.437944	Intron-(uc012eqx.1/98758,-intron-1-of-3)	ENSMUSG00000042079	Hnrnpf	heterogeneous-nuclear-ribonucleoprotein-F			Hypo
Chr2	91017869	91019877	0.348964	0.018473	0.437944	Promoter-(<=1kb)	ENSMUSG00000040687	Madd	MAP-kinase-activating-death-domain			Hyper
Chr9	95858153	95860099	0.369086	0.0184872	0.437944	Promoter-(2-3kb)	ENSMUSG00000032410	Xrn1	5'-3'-exoribonuclease-1		yes	Hyper
Chr5	22999265	23000302	0.418595	0.0185098	0.437944	Promoter-(<=1kb)	ENSMUSG00000029004	Kmt2e	lysine-(K)-specific-methyltransferase-2E			Hyper
Chr1	62223431	62224505	0.434147	0.0185385	0.437944	Intron-(uc007bfe.2/72823,-intron-10-of-22)	ENSMUSG00000052062	Pard3b	par-3-family-cell-polarity-regulator-beta			Hyper
Chr4	154088921	154090070	-0.617804	0.0185675	0.437944	Distal-Intergenic	NA	NA	NA			Hypo
Chr9	119185434	119186488	0.417114	0.0185831	0.437944	Intron-(uc009sao.1/108737,-intron-3-of-16)	ENSMUSG00000036737	Oxsr1	oxidative-stress-responsive-1		yes	Hyper
Chr5	132372917	132374000	0.525475	0.0185934	0.437944	Intron-(uc008zuv.1/319974,-intron-4-of-19)	ENSMUSG00000029673	Auts2	autism-susceptibility-candidate-2	yes	yes	Hyper
Chr9	61679043	61680081	0.442104	0.0185961	0.437944	Distal-Intergenic	NA	NA	NA			Hyper
Chr10	14137938	14139241	-0.473709	0.0186286	0.437944	Intron-(uc007elk.1/215798,-intron-21-of-24)	ENSMUSG00000039116	Adgrg6	adhesion-G-protein-coupled-receptor-G6			Hypo
Chr17	28712484	28713590	0.428468	0.018653	0.437944	Promoter-(<=1kb)	ENSMUSG00000062252	Lhfpl5	lipoma-HMGIC-fusion-partner-like-5			Hyper
Chr17	28756678	28758180	0.327474	0.018678	0.437944	Promoter-(1-2kb)	ENSMUSG00000004865	Srpk1	serine/arginine-rich-protein-specific-kinase-1		yes	Hyper
Chr1	74166787	74167827	-0.441976	0.0187128	0.437944	Intron-(uc011wmx.1/21961,-intron-1-of-34)	ENSMUSG00000055322	Tns1	tensin-1			Hypo
Chr13	28681880	28682916	0.54515	0.0187436	0.437944	Intron-(uc007pyi.1/uc007pyi.1,-intron-5-of-7)	ENSMUSG00000076431	Sox4	SRY-(sex-determining-region-Y)-box-4			Hyper
Chr4	41664009	41665348	-0.443394	0.0187442	0.437944	Exon-(uc008sji.2/53598,-exon-4-of-7)	ENSMUSG00000036114	Rpp25l	ribonuclease-P/MRP-25-subunit-like			Hypo
Chr17	64674838	64676024	0.455119	0.0187685	0.437944	Intron-(uc008dfu.1/224938,-intron-1-of-9)	ENSMUSG00000024083	Pja2	praja-ring-finger-ubiquitin-ligase-2			Hyper
Chr14	33729016	33730111	-0.483437	0.0187957	0.437944	Intron-(uc007szj.1/320736,-intron-5-of-7)	ENSMUSG00000050666	Vstm4	V-set-and-transmembrane-domain-containing-4			Hypo
Chr2	59969773	59970774	0.509109	0.0187997	0.437944	Distal-Intergenic	NA	NA	NA			Hyper
Chr5	76097438	76098600	-0.479026	0.0188107	0.437944	Distal-Intergenic	NA	NA	NA			Hypo
Chr16	14048586	14049689	0.448436	0.0188153	0.437944	Exon-(uc007ygu.1/67254,-exon-2-of-6)	ENSMUSG00000065968	Ifitm7	interferon-induced-transmembrane-protein-7			Hyper
Chr17	47809678	47810707	0.512605	0.0188183	0.437944	Promoter-(<=1kb)	ENSMUSG00000090115	Usp49	ubiquitin-specific-peptidase-49			Hyper
Chr5	112265643	112267022	-0.506669	0.0188222	0.437944	Distal-Intergenic	NA	NA	NA			Hypo
Chr3	130374235	130375438	-0.480434	0.0188566	0.437944	Distal-Intergenic	NA	NA	NA			Hypo
Chr2	141113831	141114955	0.466337	0.0188693	0.437944	Intron-(uc008mpv.1/72899,-intron-5-of-18)	ENSMUSG00000068205	Macrod2	MACRO-domain-containing-2	yes		Hyper
Chr8	42259695	42260839	0.454778	0.0188729	0.437944	Distal-Intergenic	NA	NA	NA			Hyper
Chr6	86990938	86992146	-0.46525	0.0188765	0.437944	Promoter-(<=1kb)	ENSMUSG00000029992	Gfpt1	glutamine-fructose-6-phosphate-transaminase-1		yes	Hypo
Chr12	104374694	104375807	0.530306	0.0188789	0.437944	Intron-(uc007ouw.2/217843,-intron-35-of-48)	ENSMUSG00000021198	Unc79	unc-79-homolog			Hyper
Chr16	93602400	93603751	-0.389369	0.0188803	0.437944	Promoter-(<=1kb)	ENSMUSG00000022948	Setd4	SET-domain-containing-4			Hypo
Chr15	64207398	64208808	-0.314299	0.0188871	0.437944	Intron-(uc007vzk.1/13196,-intron-1-of-30)	ENSMUSG00000022377	Asap1	ArfGAP-with-SH3-domain,-ankyrin-repeat-and-PH-domain1			Hypo
Chr11	86710340	86713134	-0.297698	0.018901	0.437944	Distal-Intergenic	NA	NA	NA			Hypo
Chr7	151356477	151358363	-0.368458	0.0189185	0.437944	Distal-Intergenic	NA	NA	NA			Hypo
Chr8	15221958	15223020	-0.582776	0.0189191	0.437944	Distal-Intergenic	NA	NA	NA			Hypo
Chr10	17646120	17647161	0.568456	0.0189276	0.437944	Intron-(uc007elw.1/380629,-intron-1-of-3)	ENSMUSG00000039879	Heca	hdc-homolog,-cell-cycle-regulator			Hyper
Chr18	80407765	80408915	0.384885	0.0189402	0.437944	5'-UTR	ENSMUSG00000057130	Txnl4a	thioredoxin-like-4A			Hyper
Chr15	37571947	37573059	0.411794	0.018953	0.437944	Intron-(uc011zsg.1/52589,-intron-2-of-6)	ENSMUSG00000051359	Ncald	neurocalcin-delta			Hyper
Chr16	22236645	22237657	0.418274	0.0189857	0.438126	Distal-Intergenic	NA	NA	NA			Hyper
Chr9	20459215	20460437	-0.529849	0.0189918	0.438126	Promoter-(2-3kb)	ENSMUSG00000032171	Pin1	protein-(peptidyl-prolyl-cis/trans-isomerase)-NIMA-interacting-1		yes	Hypo
Chr2	163342878	163343969	0.556485	0.0190172	0.438236	Intron-(uc008nsz.2/15378,-intron-1-of-7)	ENSMUSG00000017950	Hnf4a	hepatic-nuclear-factor-4,-alpha		yes	Hyper
Chr11	80716614	80717654	0.367835	0.0190275	0.438236	Intron-(uc007kml.1/11418,-intron-3-of-9)	ENSMUSG00000053184	Spaca3	sperm-acrosome-associated-3			Hyper
Chr11	99927898	99929623	0.321485	0.019061	0.438627	Intron-(uc007lke.1/uc007lke.1,-intron-1-of-2)	ENSMUSG00000048981	Krt31	keratin-31			Hyper
Chr8	11225897	11227431	0.344842	0.0190755	0.438627	Exon-(uc009kvb.2/12826,-exon-25-of-52)	ENSMUSG00000031502	Col4a1	collagen,-type-IV,-alpha-1		yes	Hyper
Chr19	3569909	3571353	0.441621	0.0191305	0.439356	Intron-(uc008fwk.2/52036,-intron-1-of-22)	ENSMUSG00000024908	Ppp6r3	protein-phosphatase-6,-regulatory-subunit-3			Hyper
Chr16	72829067	72830142	0.448008	0.0191382	0.439356	Intron-(uc007zra.1/19876,-intron-2-of-6)	ENSMUSG00000022883	Robo1	roundabout-guidance-receptor-1		yes	Hyper
Chr16	96301548	96302565	0.356014	0.0191952	0.439755	Promoter-(1-2kb)	ENSMUSG00000022914	Brwd1	bromodomain-and-WD-repeat-domain-containing-1	yes	yes	Hyper
Chr10	6297972	6299283	-0.432988	0.0192065	0.439755	Exon-(uc011wzu.1/270685,-exon-18-of-28)	ENSMUSG00000040675	Mthfd1l	methylenetetrahydrofolate-dehydrogenase-(NADP+-dependent)-1-like			Hypo
Chr10	92906379	92907525	0.47752	0.0192127	0.439755	Distal-Intergenic	NA	NA	NA			Hyper
Chr1	183880269	183881592	0.505078	0.0192375	0.439755	Intron-(uc007dxp.1/13800,-intron-3-of-14)	ENSMUSG00000022995	Enah	ENAH-actin-regulator		yes	Hyper
Chr14	87905601	87906713	-0.462544	0.0192407	0.439755	Exon-(uc007uuf.2/219249,-exon-11-of-12)	ENSMUSG00000022019	Tdrd3	tudor-domain-containing-3		yes	Hypo
Chr12	113958520	113959919	0.326464	0.0192487	0.439755	Promoter-(<=1kb)	ENSMUSG00000072825	Cep170b	centrosomal-protein-170B			Hyper
Chr18	62330754	62331928	0.53387	0.0193307	0.440647	Distal-Intergenic	NA	NA	NA			Hyper
Chr16	30512494	30513826	0.333529	0.0193309	0.440647	3'-UTR	ENSMUSG00000022537	Tmem44	transmembrane-protein-44			Hyper
Chr8	64303399	64304658	-0.482056	0.019338	0.440647	Intron-(uc009luf.1/72333,-intron-2-of-21)	ENSMUSG00000058056	Palld	palladin,-cytoskeletal-associated-protein		yes	Hypo
Chr2	162400608	162401903	-0.415077	0.0193546	0.440647	Intron-(uc008nrw.1/19281,-intron-1-of-29)	ENSMUSG00000053141	Ptprt	protein-tyrosine-phosphatase,-receptor-type,-T			Hypo
Chr10	20741898	20742935	0.51711	0.0193839	0.440647	Intron-(uc007eod.2/52906,-intron-18-of-23)	ENSMUSG00000019986	Ahi1	Abelson-helper-integration-site-1		yes	Hyper
Chr14	75284626	75285796	0.375059	0.0193864	0.440647	Intron-(uc007uqf.1/380916,-intron-1-of-19)	ENSMUSG00000068015	Lrch1	leucine-rich-repeats-and-calponin-homology-(CH)-domain-containing-1			Hyper
Chr4	87922989	87924228	0.49811	0.0194038	0.440647	Exon-(uc008tmu.1/230393,-exon-17-of-44)	ENSMUSG00000038368	Focad	focadhesin			Hyper
Chr11	117779586	117780672	-0.519607	0.0194122	0.440647	Distal-Intergenic	NA	NA	NA			Hypo
Chr8	116522381	116524116	-0.393277	0.0194795	0.441382	Distal-Intergenic	NA	NA	NA			Hypo
Chr10	120326407	120327408	0.491055	0.0194934	0.441382	Intron-(uc007hfh.2/320183,-intron-1-of-6)	ENSMUSG00000051236	Msrb3	methionine-sulfoxide-reductase-B3		yes	Hyper
Chr4	132288353	132290142	-0.31611	0.0196051	0.441382	Promoter-(<=1kb)	ENSMUSG00000037752	Xkr8	X-linked-Kx-blood-group-related-8			Hypo
Chr9	44618195	44619195	-0.444743	0.0196186	0.441382	Exon-(uc009pep.1/214162,-exon-32-of-36)	ENSMUSG00000039438	Ttc36	tetratricopeptide-repeat-domain-36			Hypo
Chr15	73097771	73098969	-0.480255	0.0196231	0.441382	Intron-(uc007wbw.2/14083,-intron-18-of-33)	ENSMUSG00000022607	Ptk2	PTK2-protein-tyrosine-kinase-2		yes	Hypo
Chr14	101861785	101862919	0.36264	0.0196281	0.441382	Promoter-(<=1kb)	ENSMUSG00000033083	Tbc1d4	TBC1-domain-family,-member-4			Hyper
Chr15	77971447	77972470	-0.536085	0.0196736	0.441382	Intron-(uc007woq.1/uc007woq.1,-intron-1-of-1)	ENSMUSG00000019146	Cacng2	calcium-channel,-voltage-dependent,-gamma-subunit-2		yes	Hypo
Chr11	65226815	65227991	0.448987	0.0196782	0.441382	Distal-Intergenic	NA	NA	NA			Hyper
Chr4	131901645	131903557	0.458055	0.0196818	0.441382	Promoter-(<=1kb)	ENSMUSG00000028896	Rcc1	regulator-of-chromosome-condensation-1			Hyper
Chr2	61570437	61571505	0.498796	0.0197151	0.441382	Intron-(uc008jvc.1/59029,-intron-3-of-11)	ENSMUSG00000026914	Psmd14	proteasome-(prosome,-macropain)-26S-subunit,-non-ATPase,-14			Hyper
Chr2	119423978	119425976	0.344768	0.0197356	0.441382	Exon-(uc008ltx.2/66602,-exon-3-of-3)	ENSMUSG00000085438	1700020I14Rik	RIKEN-cDNA-1700020I14-gene			Hyper
Chr13	63401375	63403293	-0.30106	0.0197364	0.441382	Promoter-(<=1kb)	ENSMUSG00000092741	Mir3074-1	microRNA-3074-1			Hypo
Chr2	122614673	122616049	0.491794	0.0197557	0.441382	Intron-(uc008mbh.2/59010,-intron-3-of-9)	ENSMUSG00000005803	Sqor	sulfide-quinone-oxidoreductase			Hyper
Chr13	111169291	111170350	-0.510067	0.0197617	0.441382	Distal-Intergenic	NA	NA	NA			Hypo
Chr17	24659727	24660810	-0.405246	0.0197706	0.441382	Intron-(uc008awq.2/224619,-intron-1-of-20)	ENSMUSG00000052752	Traf7	TNF-receptor-associated-factor-7			Hypo
Chr15	8617202	8618619	0.334309	0.0197731	0.441382	Intron-(uc007vey.2/20512,-intron-3-of-9)	ENSMUSG00000005360	Slc1a3	solute-carrier-family-1-(glial-high-affinity-glutamate-transporter),-member-3		yes	Hyper
Chr3	10298080	10299139	-0.593158	0.019822	0.441382	Promoter-(2-3kb)	ENSMUSG00000027530	Fabp12	fatty-acid-binding-protein-12		yes	Hypo
Chr5	109124415	109125585	-0.427343	0.0198285	0.441382	Promoter-(1-2kb)	ENSMUSG00000008090	Fgfrl1	fibroblast-growth-factor-receptor-like-1			Hypo
Chr19	27083790	27085507	0.395343	0.0198452	0.441382	Distal-Intergenic	NA	NA	NA			Hyper
Chr4	126506477	126507738	-0.404162	0.0198492	0.441382	Exon-(uc008utv.1/100317,-exon-8-of-24)	ENSMUSG00000028830	AU040320	expressed-sequence-AU040320			Hypo
Chr7	70699363	70701292	0.337193	0.0198644	0.441382	Intron-(uc009hfl.1/170711,-intron-1-of-13)	ENSMUSG00000033510	Otud7a	OTU-domain-containing-7A			Hyper
Chr19	23025217	23026295	0.48664	0.019895	0.441382	Intron-(uc008gzj.1/226025,-intron-22-of-25)	ENSMUSG00000052387	Trpm3	transient-receptor-potential-cation-channel,-subfamily-M,-member-3	yes	yes	Hyper
Chr2	155344335	155345342	0.594685	0.0199302	0.441382	Promoter-(<=1kb)	ENSMUSG00000027605	Acss2	acyl-CoA-synthetase-short-chain-family-member-2			Hyper
Chr8	98246765	98247989	0.552038	0.019933	0.441382	Exon-(uc009myz.2/234594,-exon-46-of-49)	ENSMUSG00000031671	Setd6	SET-domain-containing-6			Hyper
Chr7	51704388	51705397	-0.439548	0.0199733	0.441382	Intron-(uc009gpj.1/272381,-intron-2-of-2)	ENSMUSG00000047085	Lrrc4b	leucine-rich-repeat-containing-4B			Hypo
Chr2	136578193	136579236	0.679766	0.0199767	0.441382	Intron-(uc008mop.1/20614,-intron-1-of-7)	ENSMUSG00000027273	Snap25	synaptosomal-associated-protein-25		yes	Hyper
Chr3	121513271	121514615	0.344985	0.0199867	0.441382	Intron-(uc008reg.1/19299,-intron-1-of-22)	ENSMUSG00000028127	Abcd3	ATP-binding-cassette,-sub-family-D-(ALD),-member-3		yes	Hyper
Chr17	30517649	30518791	-0.413189	0.0199923	0.441382	Intron-(uc008btt.2/224671,-intron-6-of-10)	NA	Gm6402	ribosomal-protein-S17-pseudogene			Hypo
Chr16	91522757	91523818	-0.465194	0.0199965	0.441382	Distal-Intergenic	NA	NA	NA			Hypo
Chr2	12337478	12338536	0.502013	0.0200215	0.441382	Promoter-(2-3kb)	ENSMUSG00000026767	Mindy3	MINDY-lysine-48-deubiquitinase-3			Hyper
Chr18	52823106	52824374	0.519278	0.0200248	0.441382	3'-UTR	ENSMUSG00000024532	1700034E13Rik	RIKEN-cDNA-1700034E13-gene			Hyper
Chr10	42649603	42650697	-0.445307	0.0200267	0.441382	Exon-(uc007eza.2/268297,-exon-3-of-7)	ENSMUSG00000044770	Scml4	Scm-polycomb-group-protein-like-4			Hypo
Chr13	12586736	12587912	-0.5002	0.0200352	0.441382	Intron-(uc007plp.1/171211,-intron-4-of-5)	ENSMUSG00000095105	Edaradd	EDAR-(ectodysplasin-A-receptor)-associated-death-domain			Hypo
Chr8	93682556	93683840	-0.34472	0.0200573	0.441382	Distal-Intergenic	NA	NA	NA			Hypo
Chr11	118308617	118309824	0.355614	0.0200583	0.441382	3'-UTR	ENSMUSG00000017446	C1qtnf1	C1q-and-tumor-necrosis-factor-related-protein-1			Hyper
Chr3	156512093	156513791	0.402021	0.020072	0.441382	Intron-(uc008rvb.1/320840,-intron-1-of-6)	ENSMUSG00000040037	Negr1	neuronal-growth-regulator-1			Hyper
Chr11	106643184	106645545	0.319845	0.0200758	0.441382	Promoter-(<=1kb)	ENSMUSG00000093273	Mir3064	microRNA-3064			Hyper
Chr1	168088533	168089747	-0.408838	0.0200991	0.441382	Intron-(uc007dkj.1/59290,-intron-4-of-6)	ENSMUSG00000000544	Gpa33	glycoprotein-A33-(transmembrane)			Hypo
Chr12	85272184	85273777	-0.405552	0.0201044	0.441382	Distal-Intergenic	NA	NA	NA			Hypo
Chr10	68789735	68791181	0.386281	0.0201127	0.441382	Distal-Intergenic	NA	NA	NA			Hyper
Chr4	11174794	11176061	0.345934	0.0201179	0.441382	Exon-(uc008rzg.2/72656,-exon-3-of-28)	ENSMUSG00000040738	Ints8	integrator-complex-subunit-8			Hyper
Chr7	107309564	107310844	-0.462907	0.0201936	0.441382	Promoter-(1-2kb)	ENSMUSG00000030725	Lipt2	lipoyl(octanoyl)-transferase-2-(putative)			Hypo
Chr7	30726262	30727262	0.42967	0.0202252	0.441382	Promoter-(1-2kb)	ENSMUSG00000059975	Zfp74	zinc-finger-protein-74			Hyper
Chr7	128217491	128218746	-0.38794	0.020238	0.441382	Promoter-(<=1kb)	ENSMUSG00000035004	Igsf6	immunoglobulin-superfamily,-member-6			Hypo
Chr17	86980074	86981218	0.33296	0.0202578	0.441382	Intron-(uc008dug.2/18754,-intron-11-of-14)	ENSMUSG00000024140	Epas1	endothelial-PAS-domain-protein-1		yes	Hyper
Chr4	87813880	87815057	0.387997	0.0202649	0.441382	Intron-(uc008tmt.1/230393,-intron-5-of-8)	ENSMUSG00000070077	Mir491	microRNA-491			Hyper
Chr6	114178718	114179777	-0.482237	0.0202825	0.441382	Intron-(uc009dhs.1/243616,-intron-7-of-13)	ENSMUSG00000030310	Slc6a1	solute-carrier-family-6-(neurotransmitter-transporter,-GABA),-member-1	yes	yes	Hypo
Chr2	91152094	91153486	0.369387	0.0203213	0.441382	Intron-(uc008kvs.1/228356,-intron-3-of-8)	ENSMUSG00000027255	Arfgap2	ADP-ribosylation-factor-GTPase-activating-protein-2			Hyper
Chr1	59241921	59243836	0.439619	0.0203277	0.441382	Promoter-(<=1kb)	ENSMUSG00000026024	Als2	alsin-Rho-guanine-nucleotide-exchange-factor		yes	Hyper
Chr2	119728122	119729155	0.456285	0.0203406	0.441382	5'-UTR	ENSMUSG00000033943	Mga	MAX-gene-associated			Hyper
Chr9	50702121	50703221	0.498072	0.0203573	0.441382	3'-UTR	ENSMUSG00000032058	Ppp2r1b	protein-phosphatase-2,-regulatory-subunit-A,-beta		yes	Hyper
Chr1	91558172	91559712	0.367377	0.0203812	0.441382	Intron-(uc007byw.1/347722,-intron-6-of-17)	NA	4933400F21Rik	RIKEN-cDNA-4933400F21-gene			Hyper
Chr18	35731400	35732946	0.36474	0.020388	0.441382	5'-UTR	ENSMUSG00000037236	Matr3	matrin-3		yes	Hyper
Chr13	91268994	91270726	0.352317	0.0203887	0.441382	Intron-(uc007rjr.1/66795,-intron-3-of-7)	ENSMUSG00000021619	Atg10	autophagy-related-10		yes	Hyper
Chr11	59519393	59520772	0.372509	0.0204558	0.441382	Intron-(uc007jem.2/26936,-intron-3-of-14)	ENSMUSG00000005417	Mprip	myosin-phosphatase-Rho-interacting-protein		yes	Hyper
Chr6	134426206	134427304	0.329503	0.0204921	0.441382	Intron-(uc009ekl.2/16974,-intron-12-of-22)	ENSMUSG00000030201	Lrp6	low-density-lipoprotein-receptor-related-protein-6			Hyper
Chr10	31323608	31324980	0.388543	0.0204939	0.441382	Intron-(uc007etu.2/268291,-intron-1-of-5)	ENSMUSG00000063760	Rnf217	ring-finger-protein-217			Hyper
Chr2	160920976	160922168	0.430778	0.0205031	0.441382	Intron-(uc008nrn.1/71389,-intron-1-of-36)	ENSMUSG00000057133	Chd6	chromodomain-helicase-DNA-binding-protein-6			Hyper
Chr5	15347013	15348176	0.429439	0.0205348	0.441382	Distal-Intergenic	NA	NA	NA			Hyper
Chr8	122639452	122640782	0.307182	0.0205374	0.441382	Promoter-(1-2kb)	ENSMUSG00000031824	6430548M08Rik	RIKEN-cDNA-6430548M08-gene			Hyper
Chr2	35422361	35423479	-0.513253	0.0205655	0.441382	Intron-(uc008jkx.2/69601,-intron-1-of-16)	ENSMUSG00000026883	Dab2ip	disabled-2-interacting-protein		yes	Hypo
Chr18	65623317	65625523	0.374505	0.0205944	0.441382	Exon-(uc008fez.1/240354,-exon-11-of-16)	ENSMUSG00000032688	Malt1	MALT1-paracaspase			Hyper
Chr6	101421828	101422904	-0.504222	0.0206097	0.441382	Distal-Intergenic	NA	NA	NA			Hypo
Chr13	99362081	99363344	-0.38702	0.0206622	0.441382	Distal-Intergenic	NA	NA	NA			Hypo
Chr7	106742710	106743714	-0.424548	0.0206636	0.441382	Exon-(uc009ilu.1/109689,-exon-11-of-16)	NA	NA	NA			Hypo
Chr2	75327392	75328460	0.563226	0.0206722	0.441382	Distal-Intergenic	NA	NA	NA			Hyper
Chr6	100490175	100491430	-0.374189	0.0206879	0.441382	Distal-Intergenic	NA	NA	NA			Hypo
Chr10	107603270	107604641	0.408649	0.0206903	0.441382	Intron-(uc007gzc.1/17931,-intron-1-of-25)	ENSMUSG00000019907	Ppp1r12a	protein-phosphatase-1,-regulatory-subunit-12A		yes	Hyper
Chr11	120411409	120412910	-0.394257	0.0206999	0.441382	Promoter-(<=1kb)	ENSMUSG00000025129	Ppp1r27	protein-phosphatase-1,-regulatory-subunit-27			Hypo
Chr9	103282308	103283407	0.486166	0.0207051	0.441382	Distal-Intergenic	NA	NA	NA			Hyper
Chr1	21069981	21071379	0.373631	0.0207254	0.441382	Promoter-(<=1kb)	ENSMUSG00000041779	Tram2	translocating-chain-associating-membrane-protein-2			Hyper
Chr15	31332698	31333744	-0.380529	0.020743	0.441382	Distal-Intergenic	NA	NA	NA			Hypo
Chr1	20941967	20943278	0.44441	0.0207551	0.441382	Promoter-(<=1kb)	ENSMUSG00000041809	Efhc1	EF-hand-domain-(C-terminal)-containing-1			Hyper
Chr4	124474931	124476104	-0.434419	0.0207574	0.441382	Exon-(uc008uqy.1/16330,-exon-21-of-24)	ENSMUSG00000028890	Mtf1	metal-response-element-binding-transcription-factor-1		yes	Hypo
Chr5	35124235	35125768	-0.441199	0.0207638	0.441382	5'-UTR	ENSMUSG00000029104	Htt	huntingtin		yes	Hypo
Chr7	90746290	90747390	-0.479344	0.0207933	0.441382	Exon-(uc009idn.1/233424,-exon-6-of-19)	ENSMUSG00000038540	Tmc3	transmembrane-channel-like-gene-family-3			Hypo
Chr11	115013496	115015032	-0.393256	0.0208077	0.441382	Promoter-(<=1kb)	ENSMUSG00000020732	Rab37	RAB37,-member-RAS-oncogene-family			Hypo
Chr19	23317762	23319041	0.484388	0.0208101	0.441382	Exon-(uc008haa.1/226026,-exon-9-of-24)	ENSMUSG00000024943	Smc5	structural-maintenance-of-chromosomes-5			Hyper
Chr18	38688088	38689741	0.394748	0.0208196	0.441382	Distal-Intergenic	NA	NA	NA			Hyper
Chr15	78265747	78267031	-0.354532	0.0208319	0.441382	Exon-(uc007wpg.1/72844,-exon-5-of-7)	ENSMUSG00000033287	Kctd17	potassium-channel-tetramerisation-domain-containing-17			Hypo
Chr7	151731832	151733504	0.455075	0.0208395	0.441382	Intron-(uc012fxz.1/233977,-intron-2-of-31)	ENSMUSG00000037519	Ppfia1	protein-tyrosine-phosphatase,-receptor-type,-f-polypeptide-(PTPRF),-interacting-protein-(liprin),-alpha-1		yes	Hyper
Chr11	70002847	70003857	-0.457768	0.0208462	0.441382	Distal-Intergenic	NA	NA	NA			Hypo
Chr17	31883224	31884943	0.392374	0.0208549	0.441382	Distal-Intergenic	NA	NA	NA			Hyper
Chr5	112112397	112113989	-0.390274	0.0208729	0.441382	Distal-Intergenic	NA	NA	NA			Hypo
Chr4	81911154	81912480	0.403314	0.020881	0.441382	Distal-Intergenic	NA	NA	NA			Hyper
Chr6	48470884	48471957	0.493516	0.0208847	0.441382	Intron-(uc009bun.2/58894,-intron-3-of-6)	ENSMUSG00000039347	Atp6v0e2	ATPase,-H+-transporting,-lysosomal-V0-subunit-E2			Hyper
Chr16	77017587	77018658	0.357409	0.0208894	0.441382	Intron-(uc007zsb.1/30940,-intron-1-of-23)	ENSMUSG00000022867	Usp25	ubiquitin-specific-peptidase-25		yes	Hyper
Chr15	96147432	96148936	0.337571	0.020895	0.441382	Intron-(uc007xkd.2/77044,-intron-3-of-20)	ENSMUSG00000033237	Arid2	AT-rich-interactive-domain-2-(ARID,-RFX-like)			Hyper
Chr10	79453197	79454445	-0.481516	0.0209028	0.441382	Promoter-(1-2kb)	ENSMUSG00000004665	Cnn2	calponin-2			Hypo
Chr4	129458364	129459401	-0.520678	0.0209046	0.441382	Distal-Intergenic	NA	NA	NA			Hypo
Chr1	170009064	170010227	-0.612171	0.0209055	0.441382	Distal-Intergenic	NA	NA	NA			Hypo
Chr1	120432149	120433208	0.414742	0.0209128	0.441382	Intron-(uc011wqm.1/76707,-intron-24-of-27)	ENSMUSG00000107722	2900060B14Rik	RIKEN-cDNA-2900060B14-gene			Hyper
Chr19	10549875	10550993	-0.431489	0.0209328	0.441382	Intron-(uc008gpr.1/67752,-intron-11-of-13)	ENSMUSG00000035179	Ppp1r32	protein-phosphatase-1,-regulatory-subunit-32			Hypo
Chr15	86151303	86152540	0.307167	0.0209417	0.441382	Intron-(uc007xea.1/223754,-intron-8-of-12)	ENSMUSG00000051864	Tbc1d22a	TBC1-domain-family,-member-22a			Hyper
Chr17	28850288	28851306	0.430214	0.0209422	0.441382	5'-UTR	ENSMUSG00000053436	Mapk14	mitogen-activated-protein-kinase-14		yes	Hyper
Chr15	60749915	60751170	-0.469353	0.0209479	0.441382	Promoter-(1-2kb)	ENSMUSG00000022347	A1bg	alpha-1-B-glycoprotein			Hypo
Chr15	100430867	100432159	-0.343867	0.0209559	0.441382	Promoter-(<=1kb)	ENSMUSG00000009739	Pou6f1	POU-domain,-class-6,-transcription-factor-1			Hypo
Chr9	94892650	94893843	-0.428073	0.0210394	0.441384	Intron-(uc009ray.2/331004,-intron-9-of-15)	ENSMUSG00000031129	Slc9a9	solute-carrier-family-9-(sodium/hydrogen-exchanger),-member-9		yes	Hypo
Chr9	83089175	83090308	0.429099	0.021062	0.441384	Distal-Intergenic	NA	NA	NA			Hyper
Chr14	32156114	32157258	-0.424681	0.0210833	0.441384	Intron-(uc007sxm.1/12339,-intron-2-of-20)	ENSMUSG00000021893	Capn7	calpain-7		yes	Hypo
Chr1	128315521	128316530	-0.49884	0.021098	0.441384	Intron-(uc007ckk.1/210356,-intron-2-of-14)	ENSMUSG00000049690	Nckap5	NCK-associated-protein-5	yes	yes	Hypo
Chr1	169995722	169996947	-0.426201	0.0211054	0.441384	Distal-Intergenic	NA	NA	NA			Hypo
Chr9	32369349	32370805	-0.419743	0.0211061	0.441384	Distal-Intergenic	NA	NA	NA			Hypo
Chr5	136455124	136456820	0.381813	0.0211367	0.441384	Promoter-(<=1kb)	ENSMUSG00000004948	Zp3	zona-pellucida-glycoprotein-3			Hyper
Chr1	52344761	52345935	-0.470619	0.0211895	0.441384	Distal-Intergenic	NA	NA	NA			Hypo
Chr18	67770870	67771933	0.526631	0.0211912	0.441384	Promoter-(<=1kb)	ENSMUSG00000024533	Spire1	spire-type-actin-nucleation-factor-1			Hyper
Chr8	115257030	115258150	0.420124	0.0212203	0.441384	Exon-(uc009nnj.1/170571,-exon-4-of-21)	ENSMUSG00000031772	Cntnap4	contactin-associated-protein-like-4			Hyper
Chr18	70032967	70034044	-0.664172	0.0212505	0.441384	Distal-Intergenic	NA	NA	NA			Hypo
Chr7	71839685	71840870	-0.376771	0.0212796	0.441384	5'-UTR	ENSMUSG00000070520	Nsmce3	NSE3-homolog,-SMC5-SMC6-complex-component			Hypo
Chr1	192304029	192305647	-0.429788	0.021285	0.441384	Distal-Intergenic	NA	NA	NA			Hypo
Chr12	113909351	113911069	-0.272252	0.0212952	0.441384	Promoter-(1-2kb)	ENSMUSG00000001729	Akt1	thymoma-viral-proto-oncogene-1		yes	Hypo
Chr10	80166097	80167166	0.523964	0.0212969	0.441384	Promoter-(<=1kb)	ENSMUSG00000055862	Izumo4	IZUMO-family-member-4			Hyper
Chr1	59984416	59985453	0.499547	0.0213019	0.441384	Intron-(uc011wlt.1/72750,-intron-1-of-7)	ENSMUSG00000041040	Fam117b	family-with-sequence-similarity-117,-member-B			Hyper
Chr13	12025851	12026919	0.511216	0.0213065	0.441384	Intron-(uc007pld.1/20191,-intron-2-of-104)	ENSMUSG00000021313	Ryr2	ryanodine-receptor-2,-cardiac		yes	Hyper
Chr7	144955797	144957285	0.39588	0.0213128	0.441384	Distal-Intergenic	NA	NA	NA			Hyper
Chr4	129393121	129395290	-0.343325	0.0213286	0.441384	3'-UTR	ENSMUSG00000053730	Tmem39b	transmembrane-protein-39b			Hypo
Chr6	83447066	83448305	0.32811	0.0213469	0.441384	Intron-(uc009cnn.2/27369,-intron-1-of-6)	ENSMUSG00000014554	Dguok	deoxyguanosine-kinase			Hyper
Chr5	135262822	135264860	-0.282178	0.0213521	0.441384	Distal-Intergenic	NA	NA	NA			Hypo
Chr6	6406108	6407154	-0.444573	0.0213654	0.441384	Distal-Intergenic	NA	NA	NA			Hypo
Chr2	173922024	173923217	-0.36603	0.0213759	0.441384	3'-UTR	ENSMUSG00000039263	Npepl1	aminopeptidase-like-1			Hypo
Chr9	72121661	72122791	0.556837	0.021378	0.441384	Promoter-(<=1kb)	ENSMUSG00000038535	Zfp280d	zinc-finger-protein-280D			Hyper
Chr10	105262861	105264076	-0.470529	0.0213941	0.441384	Exon-(uc007gyo.2/216292,-exon-4-of-12)	ENSMUSG00000036009	Mettl25	methyltransferase-like-25			Hypo
Chr1	176584881	176586183	0.535882	0.0213976	0.441384	Intron-(uc007dtd.2/54418,-intron-7-of-17)	ENSMUSG00000028354	Fmn2	formin-2		yes	Hyper
Chr11	96927752	96929121	-0.41406	0.0214043	0.441384	Promoter-(<=1kb)	ENSMUSG00000038534	Osbpl7	oxysterol-binding-protein-like-7			Hypo
Chr4	55617569	55618631	-0.403993	0.0214108	0.441384	Distal-Intergenic	NA	NA	NA			Hypo
Chr16	93312052	93313732	-0.366311	0.0214363	0.441384	Distal-Intergenic	NA	NA	NA			Hypo
Chr11	18051094	18053144	0.341956	0.0214414	0.441384	Distal-Intergenic	NA	NA	NA			Hyper
Chr3	32581715	32582847	-0.415556	0.0214519	0.441384	Distal-Intergenic	NA	NA	NA			Hypo
Chr11	77213648	77214765	0.445067	0.0214579	0.441384	Intron-(uc007kgl.1/237860,-intron-4-of-14)	ENSMUSG00000037926	Ssh2	slingshot-protein-phosphatase-2			Hyper
Chr8	26118789	26119815	-0.471534	0.0214709	0.441384	Intron-(uc009lfk.2/11502,-intron-1-of-22)	ENSMUSG00000031555	Adam9	a-disintegrin-and-metallopeptidase-domain-9-(meltrin-gamma)		yes	Hypo
Chr8	127859650	127860665	-0.342354	0.0215042	0.441384	Distal-Intergenic	NA	NA	NA			Hypo
Chr15	78260409	78261615	-0.337066	0.0215105	0.441384	Promoter-(1-2kb)	ENSMUSG00000033287	Kctd17	potassium-channel-tetramerisation-domain-containing-17			Hypo
Chr6	83195163	83196193	-0.483511	0.0215169	0.441384	Intron-(uc012enx.1/232156,-intron-2-of-24)	ENSMUSG00000068323	Slc4a5	solute-carrier-family-4,-sodium-bicarbonate-cotransporter,-member-5		yes	Hypo
Chr5	119599424	119600590	-0.55283	0.0215659	0.441858	Distal-Intergenic	NA	NA	NA			Hypo
Chr8	70236467	70237677	0.500576	0.0215712	0.441858	3'-UTR	ENSMUSG00000030465	Psd3	pleckstrin-and-Sec7-domain-containing-3	yes	yes	Hyper
Chr6	117795087	117796107	0.412221	0.0216544	0.443191	Promoter-(1-2kb)	ENSMUSG00000059689	Zfp637	zinc-finger-protein-637			Hyper
Chr11	96847810	96848963	-0.354301	0.0216728	0.443191	Distal-Intergenic	NA	NA	NA			Hypo
Chr14	21665007	21666081	-0.427232	0.0216832	0.443191	Distal-Intergenic	NA	NA	NA			Hypo
Chr5	31100564	31101676	-0.380651	0.0217275	0.443776	3'-UTR	ENSMUSG00000029166	Mapre3	microtubule-associated-protein,-RP/EB-family,-member-3			Hypo
Chr10	59321483	59323120	-0.317212	0.0217643	0.444093	Intron-(uc007fdx.1/216001,-intron-10-of-11)	ENSMUSG00000020109	Dnajb12	DnaJ-heat-shock-protein-family-(Hsp40)-member-B12		yes	Hypo
Chr17	43809744	43810773	0.527902	0.0217744	0.444093	Intron-(uc008cpn.1/56050,-intron-1-of-11)	ENSMUSG00000023963	Cyp39a1	cytochrome-P450,-family-39,-subfamily-a,-polypeptide-1			Hyper
Chr10	42718710	42719727	-0.408411	0.0218017	0.444128	Downstream-(2-3kb)	ENSMUSG00000044770	Scml4	Scm-polycomb-group-protein-like-4			Hypo
Chr11	36478814	36479822	0.424688	0.0218074	0.444128	Intron-(uc007ilk.1/23964,-intron-2-of-28)	ENSMUSG00000049336	Tenm2	teneurin-transmembrane-protein-2			Hyper
Chr19	10130503	10131505	-0.403405	0.0218617	0.444914	Exon-(uc008goz.1/60527,-exon-9-of-12)	ENSMUSG00000024664	Fads3	fatty-acid-desaturase-3			Hypo
Chr17	33061668	33063191	0.363508	0.021894	0.444961	3'-UTR	ENSMUSG00000024292	Cyp4f14	cytochrome-P450,-family-4,-subfamily-f,-polypeptide-14			Hyper
Chr12	3838770	3839802	-0.402653	0.0219028	0.444961	Intron-(uc007mxa.2/13435,-intron-2-of-3)	ENSMUSG00000020661	Dnmt3a	DNA-methyltransferase-3A		yes	Hypo
Chr4	117557366	117559037	-0.326511	0.0219111	0.444961	Promoter-(<=1kb)	ENSMUSG00000033379	Atp6v0b	ATPase,-H+-transporting,-lysosomal-V0-subunit-B			Hypo
Chr18	23470289	23471292	0.505967	0.0219465	0.445211	Promoter-(1-2kb)	ENSMUSG00000024302	Dtna	dystrobrevin-alpha		yes	Hyper
Chr5	140523009	140524011	-0.440399	0.0219549	0.445211	Intron-(uc009ahj.1/17120,-intron-17-of-17)	ENSMUSG00000048988	Elfn1	leucine-rich-repeat-and-fibronectin-type-III,-extracellular-1			Hypo
Chr5	36874223	36875508	-0.321376	0.0220018	0.445353	Promoter-(<=1kb)	ENSMUSG00000029192	Tbc1d14	TBC1-domain-family,-member-14			Hypo
Chr16	66688498	66689513	0.605655	0.0220499	0.445353	Intron-(uc007zqn.2/239857,-intron-8-of-9)	ENSMUSG00000091243	Vgll3	vestigial-like-family-member-3			Hyper
Chr1	33729753	33730794	0.600484	0.022077	0.445353	Distal-Intergenic	NA	NA	NA			Hyper
Chr3	100482633	100484556	0.383311	0.0221006	0.445353	Intron-(uc008qqw.2/17156,-intron-1-of-12)	ENSMUSG00000008763	Man1a2	mannosidase,-alpha,-class-1A,-member-2		yes	Hyper
Chr4	131446623	131447707	-0.465612	0.0221233	0.445353	Exon-(uc008vaf.2/57317,-exon-2-of-6)	ENSMUSG00000028911	Srsf4	serine/arginine-rich-splicing-factor-4			Hypo
Chr11	32117535	32118536	-0.42636	0.0221295	0.445353	Intron-(uc007ijb.2/13650,-intron-1-of-17)	ENSMUSG00000020282	Rhbdf1	rhomboid-5-homolog-1			Hypo
Chr2	178315283	178316321	0.424706	0.0221404	0.445353	Distal-Intergenic	NA	NA	NA			Hyper
Chr9	118984391	118985740	0.32583	0.0221436	0.445353	Exon-(uc009saf.1/18799,-exon-4-of-15)	ENSMUSG00000038775	Vill	villin-like			Hyper
Chr11	104356129	104357226	0.532881	0.0221622	0.445353	Distal-Intergenic	NA	NA	NA			Hyper
Chr15	50527761	50529435	0.300532	0.0221713	0.445353	Intron-(uc007vqw.2/83925,-intron-7-of-8)	ENSMUSG00000038679	Trps1	transcriptional-repressor-GATA-binding-1		yes	Hyper
Chr11	114198431	114199697	0.392049	0.0221721	0.445353	Distal-Intergenic	NA	NA	NA			Hyper
Chr15	90844167	90845551	0.32891	0.0221737	0.445353	Intron-(uc007xhs.2/16564,-intron-1-of-36)	ENSMUSG00000022629	Kif21a	kinesin-family-member-21A		yes	Hyper
Chr18	47399879	47400932	-0.500563	0.0221842	0.445353	Distal-Intergenic	NA	NA	NA			Hypo
Chr13	29338782	29339944	-0.44606	0.0222103	0.445353	Distal-Intergenic	NA	NA	NA			Hypo
Chr14	76957611	76958704	0.388645	0.0222127	0.445353	Promoter-(<=1kb)	ENSMUSG00000052584	Serp2	stress-associated-endoplasmic-reticulum-protein-family-member-2		yes	Hyper
Chr7	133938594	133939913	-0.425669	0.022223	0.445353	Promoter-(2-3kb)	ENSMUSG00000030697	Ppp4c	protein-phosphatase-4,-catalytic-subunit			Hypo
Chr7	141355937	141357017	0.485448	0.0222291	0.445353	Intron-(uc009kdp.1/11489,-intron-2-of-22)	ENSMUSG00000054555	Adam12	a-disintegrin-and-metallopeptidase-domain-12-(meltrin-alpha)		yes	Hyper
Chr6	22395744	22397664	0.301695	0.0222598	0.445652	Distal-Intergenic	NA	NA	NA			Hyper
Chr6	136508705	136510211	0.301797	0.0223407	0.446956	3'-UTR	ENSMUSG00000030213	Atf7ip	activating-transcription-factor-7-interacting-protein		yes	Hyper
Chr18	80451156	80452194	0.404569	0.0224395	0.448396	Promoter-(<=1kb)	ENSMUSG00000034006	Pqlc1	PQ-loop-repeat-containing-1			Hyper
Chr1	127768460	127769658	0.35777	0.0224443	0.448396	3'-UTR	ENSMUSG00000026344	Lypd1	Ly6/Plaur-domain-containing-1			Hyper
Chr1	77530308	77531407	0.515544	0.0225243	0.44952	Distal-Intergenic	NA	NA	NA			Hyper
Chr2	112439917	112441011	-0.408763	0.0225323	0.44952	Intron-(uc008lpe.2/74268,-intron-2-of-5)	ENSMUSG00000003604	Aven	apoptosis,-caspase-activation-inhibitor		yes	Hypo
Chr10	93369739	93371267	-0.436971	0.0225757	0.450069	Distal-Intergenic	NA	NA	NA			Hypo
Chr10	80493252	80494557	-0.333659	0.0226235	0.450705	Promoter-(2-3kb)	ENSMUSG00000046822	Slc39a3	solute-carrier-family-39-(zinc-transporter),-member-3		yes	Hypo
Chr10	82672598	82673838	-0.392125	0.0226534	0.450819	Distal-Intergenic	NA	NA	NA			Hypo
Chr14	120385426	120386518	0.460065	0.0226611	0.450819	Distal-Intergenic	NA	NA	NA			Hyper
Chr1	157691910	157692954	-0.409387	0.0227391	0.451944	3'-UTR	ENSMUSG00000033671	Cep350	centrosomal-protein-350			Hypo
Chr2	165221109	165222166	-0.354296	0.0227496	0.451944	3'-UTR	ENSMUSG00000027670	Ocstamp	osteoclast-stimulatory-transmembrane-protein			Hypo
Chr5	137930470	137931664	-0.40141	0.0228032	0.452405	Intron-(uc009acn.1/13856,-intron-1-of-2)	ENSMUSG00000029711	Epo	erythropoietin		yes	Hypo
Chr11	35654799	35655987	0.380132	0.0228047	0.452405	Exon-(uc007ili.1/211652,-exon-21-of-23)	ENSMUSG00000018848	Rars	arginyl-tRNA-synthetase		yes	Hyper
Chr19	11052068	11053759	-0.482794	0.0229556	0.454738	Promoter-(2-3kb)	ENSMUSG00000024731	Ms4a10	membrane-spanning-4-domains,-subfamily-A,-member-10			Hypo
Chr13	46283236	46284370	0.428203	0.0229657	0.454738	Distal-Intergenic	NA	NA	NA			Hyper
Chr6	136854428	136855515	-0.416658	0.0229869	0.454738	Downstream-(<1kb)	ENSMUSG00000030219	Erp27	endoplasmic-reticulum-protein-27		yes	Hypo
Chr15	97905133	97906223	0.392003	0.0230219	0.454738	Intron-(uc007xlr.2/223870,-intron-6-of-18)	ENSMUSG00000033065	Pfkm	phosphofructokinase,-muscle		yes	Hyper
Chr17	67573105	67574109	-0.485775	0.02306	0.454738	Intron-(uc008dka.2/19274,-intron-1-of-30)	ENSMUSG00000033278	Ptprm	protein-tyrosine-phosphatase,-receptor-type,-M	yes	yes	Hypo
Chr1	67048234	67049258	-0.385645	0.0230743	0.454738	3'-UTR	ENSMUSG00000026000	Lancl1	LanC-(bacterial-lantibiotic-synthetase-component-C)-like-1			Hypo
Chr17	85609476	85610721	0.420113	0.023095	0.454738	Intron-(uc008dtt.1/73582,-intron-3-of-10)	ENSMUSG00000071037	Camkmt	calmodulin-lysine-N-methyltransferase			Hyper
Chr14	120142986	120144050	0.675461	0.023105	0.454738	Intron-(uc007uzn.2/50787,-intron-1-of-1)	ENSMUSG00000044819	Oxgr1	oxoglutarate-(alpha-ketoglutarate)-receptor-1			Hyper
Chr15	81140946	81142491	0.425824	0.0231125	0.454738	Distal-Intergenic	NA	NA	NA			Hyper
Chr12	53005498	53006730	0.494074	0.0231155	0.454738	Exon-(uc007nna.1/320487,-exon-12-of-25)	ENSMUSG00000035181	Heatr5a	HEAT-repeat-containing-5A			Hyper
Chr6	52751163	52753199	-0.268285	0.0231306	0.454738	Intron-(uc009bza.2/231986,-intron-3-of-4)	ENSMUSG00000004535	Tax1bp1	Tax1-(human-T-cell-leukemia-virus-type-I)-binding-protein-1			Hypo
Chr4	114343074	114344116	0.460981	0.0231578	0.454738	Distal-Intergenic	NA	NA	NA			Hyper
Chr16	9812688	9813937	-0.492211	0.0231705	0.454738	Intron-(uc007ydc.1/14811,-intron-1-of-11)	ENSMUSG00000059003	Grin2a	glutamate-receptor,-ionotropic,-NMDA2A-(epsilon-1)		yes	Hypo
Chr18	38156025	38157166	0.436736	0.0231732	0.454738	Promoter-(<=1kb)	ENSMUSG00000024451	Arap3	ArfGAP-with-RhoGAP-domain,-ankyrin-repeat-and-PH-domain-3			Hyper
Chr10	84011671	84012962	0.379001	0.0231752	0.454738	Distal-Intergenic	NA	NA	NA			Hyper
Chr11	22246147	22247211	0.436265	0.0232232	0.454738	Distal-Intergenic	NA	NA	NA			Hyper
Chr9	58903985	58904997	0.44371	0.0232321	0.454738	Distal-Intergenic	NA	NA	NA			Hyper
Chr2	121426391	121428133	0.403654	0.0232591	0.454738	Intron-(uc008lzk.1/228564,-intron-1-of-14)	ENSMUSG00000027242	Wdr76	WD-repeat-domain-76			Hyper
Chr5	102463851	102465049	0.320673	0.0232695	0.454738	Intron-(uc008yis.2/72145,-intron-2-of-66)	ENSMUSG00000043940	Wdfy3	WD-repeat-and-FYVE-domain-containing-3	yes		Hyper
Chr5	125636613	125637672	-0.327768	0.0232792	0.454738	Intron-(uc008zqy.1/20602,-intron-1-of-48)	ENSMUSG00000029478	Ncor2	nuclear-receptor-co-repressor-2		yes	Hypo
Chr16	96014921	96017056	-0.324972	0.0232799	0.454738	Distal-Intergenic	NA	NA	NA			Hypo
Chr8	111198387	111199537	-0.35469	0.0232854	0.454738	Distal-Intergenic	NA	NA	NA			Hypo
Chr13	119165808	119167705	-0.414583	0.0232915	0.454738	Downstream-(1-2kb)	ENSMUSG00000021731	Mrps30	mitochondrial-ribosomal-protein-S30			Hypo
Chr14	34016469	34017811	-0.377989	0.0233452	0.455473	Distal-Intergenic	NA	NA	NA			Hypo
Chr15	97247131	97248149	-0.468349	0.023388	0.455701	Distal-Intergenic	NA	NA	NA			Hypo
Chr7	127988360	127989384	0.343579	0.0234115	0.455701	Promoter-(1-2kb)	ENSMUSG00000035064	Eef2k	eukaryotic-elongation-factor-2-kinase		yes	Hyper
Chr18	38878298	38879441	-0.403896	0.0234153	0.455701	Distal-Intergenic	NA	NA	NA			Hypo
Chr19	20870313	20871388	0.508988	0.0234212	0.455701	Intron-(uc008gyo.1/13409,-intron-3-of-6)	ENSMUSG00000024749	Tmc1	transmembrane-channel-like-gene-family-1			Hyper
Chr6	49875412	49876650	0.46007	0.0234817	0.455953	Distal-Intergenic	NA	NA	NA			Hyper
Chr6	134682329	134683551	-0.425007	0.0234819	0.455953	Intron-(uc009eko.1/70686,-intron-4-of-6)	ENSMUSG00000030203	Dusp16	dual-specificity-phosphatase-16			Hypo
Chr2	137529218	137531674	0.301451	0.0234825	0.455953	Distal-Intergenic	NA	NA	NA			Hyper
Chr9	61386581	61387951	-0.493603	0.0235346	0.456246	Distal-Intergenic	NA	NA	NA			Hypo
Chr9	49636718	49637874	0.405059	0.0235564	0.456246	Distal-Intergenic	NA	NA	NA			Hyper
Chr8	96282089	96283121	-0.436394	0.0235631	0.456246	Distal-Intergenic	NA	NA	NA			Hypo
Chr15	38862407	38863408	-0.392589	0.0235674	0.456246	Exon-(uc007vnz.2/14368,-exon-4-of-7)	ENSMUSG00000022297	Fzd6	frizzled-class-receptor-6		yes	Hypo
Chr19	47472106	47474001	-0.306584	0.0235781	0.456246	Exon-(uc008huz.2/14218,-exon-3-of-15)	ENSMUSG00000053617	Sh3pxd2a	SH3-and-PX-domains-2A			Hypo
Chr10	93934161	93935388	-0.37283	0.0236408	0.456572	Distal-Intergenic	NA	NA	NA			Hypo
Chr9	58522349	58523368	0.491682	0.0236561	0.456572	Intron-(uc009pxh.2/73673,-intron-2-of-5)	ENSMUSG00000032336	Nptn	neuroplastin		yes	Hyper
Chr17	87767359	87768565	-0.309876	0.0236653	0.456572	Intron-(uc008duu.1/225049,-intron-18-of-18)	ENSMUSG00000036557	Stpg4	sperm-tail-PG-rich-repeat-containing-4			Hypo
Chr17	7423030	7424310	-0.296052	0.0236661	0.456572	Intron-(uc008aih.1/20112,-intron-1-of-20)	ENSMUSG00000023809	Rps6ka2	ribosomal-protein-S6-kinase,-polypeptide-2		yes	Hypo
Chr5	111436001	111437006	0.41533	0.0236846	0.456572	Promoter-(2-3kb)	ENSMUSG00000076163	Mir701	microRNA-701			Hyper
Chr16	93109581	93111550	0.328331	0.0236916	0.456572	Distal-Intergenic	NA	NA	NA			Hyper
Chr3	107005770	107006843	-0.501066	0.0237428	0.457003	Distal-Intergenic	NA	NA	NA			Hypo
Chr7	37562082	37563467	0.416177	0.0237525	0.457003	Distal-Intergenic	NA	NA	NA			Hyper
Chr7	4727122	4728465	-0.470233	0.0237669	0.457003	Promoter-(1-2kb)	ENSMUSG00000004371	Il11	interleukin-11		yes	Hypo
Chr1	75503414	75504891	0.317318	0.0237888	0.457003	Promoter-(<=1kb)	ENSMUSG00000032968	Inha	inhibin-alpha		yes	Hyper
Chr13	60149948	60152050	-0.384087	0.0238092	0.457003	Distal-Intergenic	NA	NA	NA			Hypo
Chr1	179501625	179502647	0.630116	0.0238245	0.457003	Distal-Intergenic	NA	NA	NA			Hyper
Chr6	92373238	92374279	0.438971	0.0238269	0.457003	Intron-(uc009cyx.2/243548,-intron-3-of-7)	ENSMUSG00000030020	Prickle2	prickle-planar-cell-polarity-protein-2		yes	Hyper
Chr4	148058865	148060847	-0.342173	0.0238634	0.457393	Distal-Intergenic	NA	NA	NA			Hypo
Chr9	42924573	42925645	0.464841	0.0239075	0.457636	Promoter-(<=1kb)	ENSMUSG00000048503	Tmem136	transmembrane-protein-136			Hyper
Chr14	70077261	70078307	-0.395241	0.0239111	0.457636	Exon-(uc007umn.2/94352,-exon-9-of-14)	ENSMUSG00000034194	R3hcc1	R3H-domain-and-coiled-coil-containing-1			Hypo
Chr3	85273240	85274916	0.313694	0.0239346	0.457636	Intron-(uc008pqg.2/99889,-intron-3-of-9)	ENSMUSG00000028085	Gatb	glutamyl-tRNA(Gln)-amidotransferase,-subunit-B			Hyper
Chr10	110443908	110445387	0.403558	0.0239407	0.457636	Promoter-(1-2kb)	ENSMUSG00000035798	Zdhhc17	zinc-finger,-DHHC-domain-containing-17			Hyper
Chr2	159800731	159802180	0.511346	0.0240165	0.457862	Distal-Intergenic	NA	NA	NA			Hyper
Chr8	60079445	60081343	0.318356	0.0240463	0.457862	Intron-(uc009lsy.2/108150,-intron-1-of-11)	ENSMUSG00000031608	Galnt7	polypeptide-N-acetylgalactosaminyltransferase-7		yes	Hyper
Chr16	18397094	18398788	-0.31673	0.0240515	0.457862	3'-UTR	ENSMUSG00000000325	Arvcf	armadillo-repeat-gene-deleted-in-velocardiofacial-syndrome		yes	Hypo
Chr7	80862333	80863557	0.44012	0.0240861	0.457862	Distal-Intergenic	NA	NA	NA			Hyper
Chr14	63993325	63994349	-0.439143	0.0240884	0.457862	Intron-(uc007uhq.1/12143,-intron-11-of-12)	ENSMUSG00000014453	Blk	B-lymphoid-kinase			Hypo
Chr1	168080980	168082290	-0.392792	0.0240964	0.457862	Intron-(uc007dkj.1/59290,-intron-2-of-6)	ENSMUSG00000000544	Gpa33	glycoprotein-A33-(transmembrane)			Hypo
Chr15	97427725	97429097	-0.395819	0.0240976	0.457862	Distal-Intergenic	NA	NA	NA			Hypo
Chr5	38789542	38791481	-0.356228	0.0241064	0.457862	Exon-(uc008xgo.1/117591,-exon-7-of-12)	ENSMUSG00000039358	Drd5	dopamine-receptor-D5		yes	Hypo
Chr17	29473438	29474577	-0.404014	0.0241255	0.457862	Promoter-(2-3kb)	ENSMUSG00000024012	Mtch1	mitochondrial-carrier-1			Hypo
Chr3	108116395	108117408	-0.527455	0.0241297	0.457862	Intron-(uc008qyr.1/20661,-intron-3-of-19)	ENSMUSG00000068747	Sort1	sortilin-1		yes	Hypo
Chr16	4503919	4504962	-0.486393	0.0241303	0.457862	Intron-(uc007xzt.1/106393,-intron-1-of-6)	ENSMUSG00000022519	Srl	sarcalumenin			Hypo
Chr19	45854329	45855409	0.355244	0.0241551	0.458025	Promoter-(2-3kb)	ENSMUSG00000025220	Mgea5	meningioma-expressed-antigen-5-(hyaluronidase)			Hyper
Chr1	140432593	140433985	-0.377054	0.0242031	0.458628	Intron-(uc007cvn.1/59125,-intron-3-of-9)	ENSMUSG00000026393	Nek7	NIMA-(never-in-mitosis-gene-a)-related-expressed-kinase-7			Hypo
Chr1	127598063	127599799	0.438716	0.0242308	0.458822	Intron-(uc007ckh.2/71111,-intron-1-of-1)	ENSMUSG00000026343	Gpr39	G-protein-coupled-receptor-39			Hyper
Chr15	97743933	97745210	0.466204	0.0242457	0.458822	Distal-Intergenic	NA	NA	NA			Hyper
Chr8	11098042	11099270	0.39414	0.0242881	0.45895	Distal-Intergenic	NA	NA	NA			Hyper
Chr10	115358279	115359574	0.411654	0.0243008	0.45895	Distal-Intergenic	NA	NA	NA			Hyper
Chr2	33953162	33954393	-0.38029	0.0243128	0.45895	Intron-(uc008jig.1/uc008jig.1,-intron-1-of-3)	ENSMUSG00000038740	Mvb12b	multivesicular-body-subunit-12B			Hypo
Chr12	52762090	52763127	0.482276	0.0243342	0.45895	Exon-(uc007nmt.2/94186,-exon-2-of-18)	ENSMUSG00000020954	Strn3	striatin,-calmodulin-binding-protein-3			Hyper
Chr10	90202597	90203709	0.440195	0.0243687	0.45895	Intron-(uc011xlm.1/77531,-intron-17-of-24)	ENSMUSG00000058589	Anks1b	ankyrin-repeat-and-sterile-alpha-motif-domain-containing-1B	yes	yes	Hyper
Chr17	63078621	63079878	0.465038	0.0243695	0.45895	Intron-(uc008dfg.2/13640,-intron-1-of-4)	ENSMUSG00000048915	Efna5	ephrin-A5		yes	Hyper
Chr4	129580747	129582024	-0.465002	0.0243719	0.45895	Exon-(uc008uyi.1/uc008uyi.1,-exon-1-of-2)	ENSMUSG00000028788	Ptp4a2	protein-tyrosine-phosphatase-4a2		yes	Hypo
Chr11	67508580	67509695	-0.393017	0.0243821	0.45895	Promoter-(<=1kb)	ENSMUSG00000020907	Rcvrn	recoverin		yes	Hypo
Chr13	78356043	78357294	0.457572	0.024453	0.459312	Intron-(uc007rhf.1/uc007rhf.1,-intron-1-of-2)	ENSMUSG00000069171	Nr2f1	nuclear-receptor-subfamily-2,-group-F,-member-1			Hyper
Chr13	49517638	49518795	-0.378604	0.024473	0.459312	Promoter-(<=1kb)	ENSMUSG00000021385	Ippk	inositol-1,3,4,5,6-pentakisphosphate-2-kinase			Hypo
Chr4	58476477	58477490	-0.430595	0.0244914	0.459312	Intron-(uc008szb.2/14745,-intron-2-of-2)	ENSMUSG00000093293	Mir3095	microRNA-3095			Hypo
Chr8	106963831	106965681	0.295868	0.024505	0.459312	Promoter-(1-2kb)	ENSMUSG00000035770	Dync1li2	dynein,-cytoplasmic-1-light-intermediate-chain-2			Hyper
Chr3	88744117	88745315	-0.49215	0.0245066	0.459312	Intron-(uc008pxg.2/65111,-intron-2-of-12)	ENSMUSG00000068921	Dap3	death-associated-protein-3			Hypo
Chr10	58137407	58138604	0.389652	0.0245295	0.459312	Promoter-(<=1kb)	ENSMUSG00000003227	Edar	ectodysplasin-A-receptor			Hyper
Chr6	34092482	34093676	-0.52596	0.0245327	0.459312	Distal-Intergenic	NA	NA	NA			Hypo
Chr11	71566600	71567975	-0.40713	0.0245472	0.459312	Promoter-(1-2kb)	ENSMUSG00000020811	Wscd1	WSC-domain-containing-1		yes	Hypo
Chr16	31588503	31589612	0.526558	0.0245518	0.459312	Distal-Intergenic	NA	NA	NA			Hyper
Chr18	83194653	83196468	0.310954	0.0245635	0.459312	Exon-(uc008fuh.1/uc008fuh.1,-exon-3-of-3)	NA	4930592I03Rik	RIKEN-cDNA-4930592I03-gene			Hyper
Chr5	140862339	140864609	-0.329513	0.0246023	0.459324	Promoter-(<=1kb)	ENSMUSG00000029560	Snx8	sorting-nexin-8		yes	Hypo
Chr7	28082300	28084493	0.306145	0.0246083	0.459324	Distal-Intergenic	NA	NA	NA			Hyper
Chr8	11561290	11562513	0.298291	0.0246323	0.459324	Promoter-(2-3kb)	ENSMUSG00000045969	Ing1	inhibitor-of-growth-family,-member-1			Hyper
Chr4	149892374	149893392	0.417797	0.024645	0.459324	Intron-(uc008vxr.1/68703,-intron-10-of-22)	ENSMUSG00000039852	Rere	arginine-glutamic-acid-dipeptide-(RE)-repeats		yes	Hyper
Chr7	16762298	16763417	-0.450765	0.0246452	0.459324	Promoter-(1-2kb)	ENSMUSG00000041420	Meis3	Meis-homeobox-3			Hypo
Chr15	87550631	87552000	-0.437862	0.0246791	0.459477	Exon-(uc007xee.1/106014,-exon-3-of-4)	ENSMUSG00000054863	Fam19a5	family-with-sequence-similarity-19,-member-A5			Hypo
Chr10	76541434	76542565	-0.529723	0.0246986	0.459477	Exon-(uc007fvg.1/12822,-exon-8-of-41)	ENSMUSG00000001435	Col18a1	collagen,-type-XVIII,-alpha-1			Hypo
Chr16	45639910	45640969	-0.509899	0.0247071	0.459477	Exon-(uc012agh.1/212998,-exon-3-of-6)	ENSMUSG00000033187	BC016579	cDNA-sequence,-BC016579			Hypo
Chr18	54115432	54117079	-0.344175	0.0247266	0.459477	Distal-Intergenic	NA	NA	NA			Hypo
[truncated: 1,088 more rows]

## Sheet: Striatum PSWT vs ControlWT
Dataset 1: DhMRs and DhMR-associated genes
Striatum
PS WT vs Control WT
[truncated: 1,702 more rows]

## Sheet: Striatum PSHETvsControlHET
Dataset 1: DhMRs and DhMR-associated genes
[truncated: 3,371 more rows]

[truncated: 3 more sheets: Striatum Female HomozygousvsWT, Hippocampus Ctrl WT vs Ctrl HET, Striatum  Ctrl WT vs Ctrl HET]
