# Supplementary material for: Gene by environment interaction mouse model reveals a functional role for 5-hydroxymethylcytosine in neurodevelopmental disorders
Source: HighWire-hosted journal article supplement (doi:10.1101/gr.276137.121), 2021-12-23
Supplement: Supplemental_Dataset_S2.xlsx [file Supplemental_Dataset_S2.xlsx]

## Sheet: HippocampusPSWTvsCtrlWTHyper 
Dataset 2: Hyper DhMR-associated gene ontologies
Hippocampus
PS WT vs Control WT
GO ID	Description	P-value	# of genes	Gene Symbol
GO:0060043	regulation of cardiac muscle cell proliferation	0.000161868	8	Cdk1/Fgfr1/Foxp1/Ncam1/Pten/Tgfbr2/Tgfbr3/Zfpm2
GO:0071417	cellular response to organonitrogen compound	0.000171273	31	Akap6/Atp1a3/Crk/Dnmt1/Ezr/Foxo1/Gabpa/H2afz/Igf1r/Igfbp5/Insr/Irs1/Itpr1/Jak2/Kank1/Lmbrd1/Lrrk2/Mgarp/Mir107/Mirlet7i/Pid1/Pkm/Prkca/Pten/Ptk2/Rock1/Sesn2/Slc8a1/Srsf3/Xbp1/Zeb1
GO:0014855	striated muscle cell proliferation	0.000226249	10	Cdk1/Fgfr1/Foxp1/Jak2/Megf10/Ncam1/Pten/Tgfbr2/Tgfbr3/Zfpm2
GO:1901861	regulation of muscle tissue development	0.000277545	15	Akap6/Cdk1/Cyp26b1/Fgfr1/Foxp1/Igfbp5/Lrp6/Megf10/Ncam1/Pten/Rbfox1/Sox6/Tgfbr2/Tgfbr3/Zfpm2
GO:0035136	forelimb morphogenesis	0.000291017	7	Alx3/Cacna1c/Fmn1/Lnpk/Lrp6/Nipbl/Tbx3
GO:0046620	regulation of organ growth	0.000305337	12	Akap6/Cacna1c/Cdk1/Fgfr1/Foxp1/Men1/Ncam1/Pten/Ptk2/Tgfbr2/Tgfbr3/Zfpm2
GO:0055024	regulation of cardiac muscle tissue development	0.000406091	11	Akap6/Cdk1/Fgfr1/Foxp1/Lrp6/Ncam1/Pten/Sox6/Tgfbr2/Tgfbr3/Zfpm2
GO:0045732	positive regulation of protein catabolic process	0.000484039	15	Arih1/Csnk1a1/Ezr/Foxo1/Hspa1a/Lrrk2/Nedd4l/Prickle1/Pten/Ptk2/Rnf217/Sh3d19/Smurf2/Snx9/Xbp1
GO:0035115	embryonic forelimb morphogenesis	0.00050785	6	Alx3/Cacna1c/Lnpk/Lrp6/Nipbl/Tbx3
GO:0055021	regulation of cardiac muscle tissue growth	0.000681472	9	Akap6/Cdk1/Fgfr1/Foxp1/Ncam1/Pten/Tgfbr2/Tgfbr3/Zfpm2
GO:0016202	regulation of striated muscle tissue development	0.000744184	14	Akap6/Cdk1/Cyp26b1/Fgfr1/Foxp1/Lrp6/Megf10/Ncam1/Pten/Rbfox1/Sox6/Tgfbr2/Tgfbr3/Zfpm2
GO:1901699	cellular response to nitrogen compound	0.000878721	31	Akap6/Atp1a3/Crk/Dnmt1/Ezr/Foxo1/Gabpa/H2afz/Igf1r/Igfbp5/Insr/Irs1/Itpr1/Jak2/Kank1/Lmbrd1/Lrrk2/Mgarp/Mir107/Mirlet7i/Pid1/Pkm/Prkca/Pten/Ptk2/Rock1/Sesn2/Slc8a1/Srsf3/Xbp1/Zeb1
GO:0048813	dendrite morphogenesis	0.000879147	15	Camk2b/Ctnnd2/Cux2/Dclk1/Elavl4/Fmn1/Kidins220/Lrrk2/Mef2a/Nedd4l/Ppp1r9a/Pten/Ptprd/Tnik/Trak1
GO:0071375	cellular response to peptide hormone stimulus	0.000946929	18	Crk/Foxo1/H2afz/Igf1r/Insr/Irs1/Jak2/Kank1/Lmbrd1/Mgarp/Pid1/Pkm/Prkca/Pten/Ptk2/Rock1/Srsf3/Xbp1
GO:0048634	regulation of muscle organ development	0.000967213	14	Akap6/Cdk1/Cyp26b1/Fgfr1/Foxp1/Lrp6/Megf10/Ncam1/Pten/Rbfox1/Sox6/Tgfbr2/Tgfbr3/Zfpm2
GO:0060038	cardiac muscle cell proliferation	0.000984513	8	Cdk1/Fgfr1/Foxp1/Ncam1/Pten/Tgfbr2/Tgfbr3/Zfpm2
GO:0060420	regulation of heart growth	0.00117307	9	Akap6/Cdk1/Fgfr1/Foxp1/Ncam1/Pten/Tgfbr2/Tgfbr3/Zfpm2
GO:1901653	cellular response to peptide	0.00129194	19	Atp1a3/Crk/Foxo1/H2afz/Igf1r/Insr/Irs1/Jak2/Kank1/Lmbrd1/Mgarp/Pid1/Pkm/Prkca/Pten/Ptk2/Rock1/Srsf3/Xbp1
GO:0016570	histone modification	0.00129667	25	Asxl1/Bend3/Bmi1/Dnmt1/Elk4/Ep400/Eya2/Jade2/Jak2/Kdm5c/Kmt2a/Kmt5b/Leo1/Lrrk2/Men1/Msl1/Nipbl/Nsd1/Ppp5c/Prkca/Prmt5/Rif1/Supt3/Trip12/Xbp1
GO:0030201	heparan sulfate proteoglycan metabolic process	0.00145159	5	Hs2st1/Hs6st3/Sulf1/Vangl2/Xylt1
GO:1901379	regulation of potassium ion transmembrane transport	0.00150896	9	Akap6/Ano6/Atp1b1/Atp1b3/Dpp6/Kcnab2/Nedd4l/Oxsr1/Pten
GO:0043266	regulation of potassium ion transport	0.00157157	10	Akap6/Ano6/Atp1b1/Atp1b3/Dpp6/Kcnab2/Nedd4l/Oxsr1/Plcb4/Pten
GO:0071559	response to transforming growth factor beta	0.00163994	17	Crk/Dnmt1/Fermt2/Glg1/Igf1r/Lrrc32/Men1/Ptk2/Ptprk/Rock1/Smurf2/Sox5/Sox6/Tgfbr2/Tgfbr3/Xbp1/Zeb1
GO:0016569	covalent chromatin modification	0.00166106	25	Asxl1/Bend3/Bmi1/Dnmt1/Elk4/Ep400/Eya2/Jade2/Jak2/Kdm5c/Kmt2a/Kmt5b/Leo1/Lrrk2/Men1/Msl1/Nipbl/Nsd1/Ppp5c/Prkca/Prmt5/Rif1/Supt3/Trip12/Xbp1
GO:0060979	vasculogenesis involved in coronary vascular morphogenesis	0.00170807	4	Epo/Fgfr1/Tgfbr3/Zfpm2
GO:0106027	neuron projection organization	0.00175091	10	Abhd17b/Atp1a3/Camk2b/Ctnnd2/Cux2/Igf1r/Insr/Lrrk2/Ppp1r9a/Pten
GO:0060045	positive regulation of cardiac muscle cell proliferation	0.00186222	5	Cdk1/Fgfr1/Ncam1/Tgfbr3/Zfpm2
GO:0043434	response to peptide hormone	0.00188174	20	Crk/Foxo1/H2afz/Igf1r/Insr/Irs1/Jak2/Kank1/Lmbrd1/Mgarp/Pid1/Pkm/Prkca/Pten/Ptk2/Rock1/Sesn2/Srsf3/Tgfbr3/Xbp1
GO:0010464	regulation of mesenchymal cell proliferation	0.00191639	7	Fgfr1/Foxp1/Irs1/Lrp6/Nfib/Tgfbr2/Zeb1
GO:0048738	cardiac muscle tissue development	0.00193712	18	Adamts9/Akap6/Cdk1/Epo/Fgfr1/Fhod3/Foxp1/Lrp6/Mef2a/Ncam1/Nrap/Pten/Slc8a1/Sox6/Tbx3/Tgfbr2/Tgfbr3/Zfpm2
GO:0034329	cell junction assembly	0.00231977	16	Afdn/Cdh2/Cdh26/Ctnnd2/Fermt2/Fmn1/Limch1/Nedd4l/Phldb2/Pkp4/Prkca/Prkch/Pten/Ptk2/Ptprk/Rock1
GO:0048103	somatic stem cell division	0.00235179	5	Bmi1/Fgfr1/Lrp6/Sox5/Vangl2
GO:0140115	export across plasma membrane	0.00235179	5	Ano6/Atp1a3/Atp1b1/Atp1b3/Slc8a1
GO:1905331	negative regulation of morphogenesis of an epithelium	0.00237713	4	Lrp6/Phldb2/Pten/Sulf1
GO:1903364	positive regulation of cellular protein catabolic process	0.00239039	10	Arih1/Csnk1a1/Ezr/Hspa1a/Lrrk2/Prickle1/Pten/Ptk2/Rnf217/Xbp1
GO:0022612	gland morphogenesis	0.00294631	12	Cul3/Fgfr1/Gdf7/Igf1r/Igfbp5/Lrp6/Nfib/Ntn1/Sulf1/Tbx3/Tgfbr2/Xbp1
GO:1903052	positive regulation of proteolysis involved in cellular protein catabolic process	0.00300016	9	Arih1/Csnk1a1/Hspa1a/Lrrk2/Prickle1/Pten/Ptk2/Rnf217/Xbp1
GO:0071560	cellular response to transforming growth factor beta stimulus	0.00300346	16	Crk/Dnmt1/Fermt2/Glg1/Igf1r/Lrrc32/Men1/Ptk2/Ptprk/Smurf2/Sox5/Sox6/Tgfbr2/Tgfbr3/Xbp1/Zeb1
GO:0055023	positive regulation of cardiac muscle tissue growth	0.00319408	6	Akap6/Cdk1/Fgfr1/Ncam1/Tgfbr3/Zfpm2
GO:0006883	cellular sodium ion homeostasis	0.00320666	4	Atp1a3/Atp1b1/Atp1b3/Slc8a1
GO:0034332	adherens junction organization	0.00325386	11	Afdn/Cdh2/Cdh26/Fermt2/Fmn1/Limch1/Phldb2/Pten/Ptk2/Ptprk/Rock1
GO:0044728	DNA methylation or demethylation	0.00329497	8	Apex1/Bend3/Bmi1/Dnmt1/Kmt2a/Otud4/Prmt5/Tdrd1
GO:0097061	dendritic spine organization	0.00333432	9	Abhd17b/Camk2b/Ctnnd2/Cux2/Igf1r/Insr/Lrrk2/Ppp1r9a/Pten
GO:2000146	negative regulation of cell motility	0.00346743	17	Adamts9/Afdn/Apex1/Crk/Cxcl12/Fbln1/Igfbp5/Kank1/Limch1/Phldb2/Pten/Ptk2/Ptprk/Ptprm/Ripor2/Sulf1/Tgfbr3
GO:1901652	response to peptide	0.00369258	21	Atp1a3/Crk/Foxo1/H2afz/Igf1r/Insr/Irs1/Jak2/Kank1/Lmbrd1/Mgarp/Pid1/Pkm/Prkca/Pten/Ptk2/Rock1/Sesn2/Srsf3/Tgfbr3/Xbp1
GO:2000060	positive regulation of ubiquitin-dependent protein catabolic process	0.00370257	8	Arih1/Csnk1a1/Hspa1a/Lrrk2/Prickle1/Pten/Ptk2/Rnf217
GO:0060537	muscle tissue development	0.00375858	26	Adamts9/Akap6/Cdk1/Cyp26b1/Epo/Eya2/Fgfr1/Fhod3/Foxp1/Hivep3/Igfbp5/Lrp6/Mef2a/Megf10/Ncam1/Nrap/Pten/Rbfox1/Ripor2/Slc8a1/Sox6/Tbx3/Tgfbr2/Tgfbr3/Zfp689/Zfpm2
GO:0002062	chondrocyte differentiation	0.00385688	11	Coch/Fgfr1/Glg1/Ift80/Lnpk/Nfib/Prkca/Sox5/Sox6/Sulf1/Tgfbr2
GO:0055025	positive regulation of cardiac muscle tissue development	0.00390754	7	Akap6/Cdk1/Fgfr1/Foxp1/Ncam1/Tgfbr3/Zfpm2
GO:0042176	regulation of protein catabolic process	0.00398264	20	Arih1/Ccar2/Csnk1a1/Dedd/Ezr/Foxo1/Hspa1a/Laptm4b/Lrrk2/Nedd4l/Prickle1/Pten/Ptk2/Rnf217/Sh3d19/Smurf2/Snx9/Tmf1/Usp25/Xbp1
GO:0014706	striated muscle tissue development	0.00412648	25	Adamts9/Akap6/Cdk1/Cyp26b1/Epo/Eya2/Fgfr1/Fhod3/Foxp1/Hivep3/Lrp6/Mef2a/Megf10/Ncam1/Nrap/Pten/Rbfox1/Ripor2/Slc8a1/Sox6/Tbx3/Tgfbr2/Tgfbr3/Zfp689/Zfpm2
GO:0014743	regulation of muscle hypertrophy	0.0041481	8	Akap6/Foxo1/Foxp1/Igfbp5/Mef2a/Prkca/Ptk2/Rock1
GO:0061756	leukocyte adhesion to vascular endothelial cell	0.00421359	4	Cxcl12/Ets1/Podxl2/Rock1
GO:0033002	muscle cell proliferation	0.00433499	16	Cdk1/Dnmt1/Fgfr1/Foxp1/Igf1r/Igfbp5/Il12a/Jak2/Megf10/Ncam1/Prkca/Pten/Ptk2/Tgfbr2/Tgfbr3/Zfpm2
GO:0060421	positive regulation of heart growth	0.00438191	6	Akap6/Cdk1/Fgfr1/Ncam1/Tgfbr3/Zfpm2
GO:0010463	mesenchymal cell proliferation	0.00444599	7	Fgfr1/Foxp1/Irs1/Lrp6/Nfib/Tgfbr2/Zeb1
GO:0071804	cellular potassium ion transport	0.00496419	14	Akap6/Ano6/Atp1a3/Atp1b1/Atp1b3/Dpp6/Kcnab2/Kcnj12/Kcnq4/Nedd4l/Oxsr1/Pten/Slc12a4/Slc9a9
GO:0071805	potassium ion transmembrane transport	0.00496419	14	Akap6/Ano6/Atp1a3/Atp1b1/Atp1b3/Dpp6/Kcnab2/Kcnj12/Kcnq4/Nedd4l/Oxsr1/Pten/Slc12a4/Slc9a9
GO:0006325	chromatin organization	0.00511465	32	Arid1b/Asxl1/Bend3/Bmi1/Dnmt1/Dpf3/Elk4/Ep400/Eya2/H2afz/Hmg20a/Hmgb4/Jade2/Jak2/Kdm5c/Kmt2a/Kmt5b/Leo1/Lrrk2/Men1/Msl1/Nipbl/Nsd1/Ppp5c/Prkca/Prmt5/Rif1/Supt3/Trip12/Tspyl4/Xbp1/Zmynd11
GO:0007045	cell-substrate adherens junction assembly	0.00516203	8	Fermt2/Fmn1/Limch1/Phldb2/Pten/Ptk2/Ptprk/Rock1
GO:0048041	focal adhesion assembly	0.00516203	8	Fermt2/Fmn1/Limch1/Phldb2/Pten/Ptk2/Ptprk/Rock1
GO:0015012	heparan sulfate proteoglycan biosynthetic process	0.005414	4	Hs2st1/Hs6st3/Vangl2/Xylt1
GO:2000114	regulation of establishment of cell polarity	0.005414	4	Kank1/Ripor2/Rock1/Shtn1
GO:0006304	DNA modification	0.00573506	8	Apex1/Bend3/Bmi1/Dnmt1/Kmt2a/Otud4/Prmt5/Tdrd1
GO:0017145	stem cell division	0.00586721	6	Bmi1/Cul3/Fgfr1/Lrp6/Sox5/Vangl2
GO:0061061	muscle structure development	0.00598866	34	Akap6/Cd164/Cdh2/Cdk1/Cxcl12/Cyp26b1/Dnmt1/Epo/Fgfr1/Fhod3/Foxp1/Hivep3/Igfbp5/Kmt5b/Krt19/Lrp6/Mef2a/Megf10/Ncam1/Nrap/Prickle1/Pten/Rbfox1/Ripor2/Slc8a1/Sox6/Tbx3/Tgfbr2/Tgfbr3/Vangl2/Xbp1/Zeb1/Zfp689/Zfpm2
GO:1903362	regulation of cellular protein catabolic process	0.00600106	14	Arih1/Ccar2/Csnk1a1/Ezr/Hspa1a/Laptm4b/Lrrk2/Prickle1/Pten/Ptk2/Rnf217/Tmf1/Usp25/Xbp1
GO:0032410	negative regulation of transporter activity	0.00717455	7	Epo/Insr/Nedd4l/Oxsr1/Prkca/Pten/Sri
GO:0120039	plasma membrane bounded cell projection morphogenesis	0.00738213	35	B3gnt2/Camk2b/Cdh2/Ctnnd2/Cux2/Cxcl12/Dclk1/Elavl4/Fmn1/Foxp1/Gdf7/Igf1r/Itsn2/Jade2/Kank1/Kidins220/Lrrk2/Mef2a/Ncam1/Nedd4l/Nfib/Ntn1/Plxnc1/Ppp1r9a/Prkca/Pten/Ptk2/Ptprd/Ptprm/Rock1/Shtn1/Tnik/Trak1/Unc5a/Vangl2
GO:0046627	negative regulation of insulin receptor signaling pathway	0.00741233	5	Irs1/Kank1/Lmbrd1/Pid1/Prkca
GO:0055026	negative regulation of cardiac muscle tissue development	0.00741233	5	Foxp1/Lrp6/Pten/Sox6/Tgfbr2
GO:1901381	positive regulation of potassium ion transmembrane transport	0.00741233	5	Akap6/Ano6/Atp1b1/Atp1b3/Dpp6
GO:0048639	positive regulation of developmental growth	0.00764636	14	Akap6/Cdk1/Cxcl12/Ezr/Fgfr1/Insr/Itsn2/Ncam1/Nedd4l/Nipbl/Ntn1/Shtn1/Tgfbr3/Zfpm2
GO:0055017	cardiac muscle tissue growth	0.00783128	9	Akap6/Cdk1/Fgfr1/Foxp1/Ncam1/Pten/Tgfbr2/Tgfbr3/Zfpm2
GO:0048858	cell projection morphogenesis	0.00784719	35	B3gnt2/Camk2b/Cdh2/Ctnnd2/Cux2/Cxcl12/Dclk1/Elavl4/Fmn1/Foxp1/Gdf7/Igf1r/Itsn2/Jade2/Kank1/Kidins220/Lrrk2/Mef2a/Ncam1/Nedd4l/Nfib/Ntn1/Plxnc1/Ppp1r9a/Prkca/Pten/Ptk2/Ptprd/Ptprm/Rock1/Shtn1/Tnik/Trak1/Unc5a/Vangl2
GO:0035050	embryonic heart tube development	0.00801689	7	Lrp6/Nphp3/Slc8a1/Tbx3/Tead2/Tgfbr2/Vangl2
GO:0048667	cell morphogenesis involved in neuron differentiation	0.00814917	32	B3gnt2/Camk2b/Cdh2/Ctnnd2/Cux2/Cxcl12/Dclk1/Elavl4/Fmn1/Foxp1/Gdf7/Igf1r/Kidins220/Lrrk2/Mef2a/Ncam1/Nedd4l/Nfib/Ntn1/Plxnc1/Ppp1r9a/Prkca/Pten/Ptk2/Ptprd/Ptprm/Ripor2/Shtn1/Tnik/Trak1/Unc5a/Vangl2
GO:0048812	neuron projection morphogenesis	0.0084653	34	B3gnt2/Camk2b/Cdh2/Ctnnd2/Cux2/Cxcl12/Dclk1/Elavl4/Fmn1/Foxp1/Gdf7/Igf1r/Itsn2/Jade2/Kidins220/Lrrk2/Mef2a/Ncam1/Nedd4l/Nfib/Ntn1/Plxnc1/Ppp1r9a/Prkca/Pten/Ptk2/Ptprd/Ptprm/Rock1/Shtn1/Tnik/Trak1/Unc5a/Vangl2
GO:0031062	positive regulation of histone methylation	0.0086857	5	Dnmt1/Kmt2a/Men1/Rif1/Xbp1
GO:0071320	cellular response to cAMP	0.0086857	5	Akap6/Ezr/Igfbp5/Itpr1/Slc8a1
GO:1900077	negative regulation of cellular response to insulin stimulus	0.0086857	5	Irs1/Kank1/Lmbrd1/Pid1/Prkca
GO:0046622	positive regulation of organ growth	0.00873904	6	Akap6/Cdk1/Fgfr1/Ncam1/Tgfbr3/Zfpm2
GO:0046323	glucose import	0.00892993	7	Insr/Irs1/Lmbrd1/Mef2a/Pid1/Prkca/Sesn2
GO:0032869	cellular response to insulin stimulus	0.00902753	13	Foxo1/H2afz/Igf1r/Insr/Irs1/Kank1/Lmbrd1/Pid1/Pkm/Prkca/Pten/Srsf3/Xbp1
GO:0034333	adherens junction assembly	0.00935566	8	Fermt2/Fmn1/Limch1/Phldb2/Pten/Ptk2/Ptprk/Rock1
GO:0010523	negative regulation of calcium ion transport into cytosol	0.00943718	3	Epo/Ntsr1/Sri
GO:0030007	cellular potassium ion homeostasis	0.00943718	3	Atp1a3/Atp1b1/Atp1b3
GO:0006813	potassium ion transport	0.0095457	15	Akap6/Ano6/Atp1a3/Atp1b1/Atp1b3/Dpp6/Kcnab2/Kcnj12/Kcnq4/Nedd4l/Oxsr1/Plcb4/Pten/Slc12a4/Slc9a9
GO:0007044	cell-substrate junction assembly	0.0102477	8	Fermt2/Fmn1/Limch1/Phldb2/Pten/Ptk2/Ptprk/Rock1
GO:0045844	positive regulation of striated muscle tissue development	0.0102477	8	Akap6/Cdk1/Cyp26b1/Fgfr1/Foxp1/Ncam1/Tgfbr3/Zfpm2
GO:0048636	positive regulation of muscle organ development	0.0102477	8	Akap6/Cdk1/Cyp26b1/Fgfr1/Foxp1/Ncam1/Tgfbr3/Zfpm2
GO:0071108	protein K48-linked deubiquitination	0.0103224	4	Mindy1/Mindy2/Otud4/Usp25
GO:1903050	regulation of proteolysis involved in cellular protein catabolic process	0.0106398	12	Arih1/Ccar2/Csnk1a1/Hspa1a/Lrrk2/Prickle1/Pten/Ptk2/Rnf217/Tmf1/Usp25/Xbp1
GO:1901863	positive regulation of muscle tissue development	0.0112012	8	Akap6/Cdk1/Cyp26b1/Fgfr1/Foxp1/Ncam1/Tgfbr3/Zfpm2
GO:1901888	regulation of cell junction assembly	0.0112012	8	Fmn1/Limch1/Nedd4l/Phldb2/Prkch/Pten/Ptk2/Rock1
GO:0019722	calcium-mediated signaling	0.0114335	13	Akap6/Asph/Atp1b1/Camta1/Ccrl2/Homer2/Itpr1/Lrrk2/Ncald/Ncam1/Ppp1r9a/Slc8a1/Sri
GO:0046621	negative regulation of organ growth	0.0116703	5	Foxp1/Men1/Pten/Ptk2/Tgfbr2
GO:0030336	negative regulation of cell migration	0.0117656	15	Adamts9/Afdn/Apex1/Cxcl12/Igfbp5/Kank1/Limch1/Phldb2/Pten/Ptk2/Ptprk/Ptprm/Ripor2/Sulf1/Tgfbr3
GO:0007043	cell-cell junction assembly	0.011797	9	Afdn/Cdh2/Cdh26/Ctnnd2/Nedd4l/Pkp4/Prkca/Prkch/Rock1
GO:0060419	heart growth	0.011797	9	Akap6/Cdk1/Fgfr1/Foxp1/Ncam1/Pten/Tgfbr2/Tgfbr3/Zfpm2
GO:0098659	inorganic cation import across plasma membrane	0.012126	7	Atp1a3/Atp1b1/Atp1b3/Kcnj12/Slc12a4/Slc8a1/Slc9a9
GO:0099587	inorganic ion import across plasma membrane	0.012126	7	Atp1a3/Atp1b1/Atp1b3/Kcnj12/Slc12a4/Slc8a1/Slc9a9
GO:0031331	positive regulation of cellular catabolic process	0.0121296	18	Arih1/Csnk1a1/Ezr/Foxo1/Hmgb4/Hspa1a/Insr/Irs1/Lrrk2/Prickle1/Pten/Ptk2/Rnf217/Rock1/Sesn2/Sh3d19/Snx9/Xbp1
GO:0040013	negative regulation of locomotion	0.0121296	18	Adamts9/Afdn/Apex1/Crk/Cxcl12/Fbln1/Igfbp5/Kank1/Limch1/Phldb2/Pten/Ptk2/Ptprk/Ptprm/Ripor2/Sulf1/Tgfbr3/Trim11
GO:0001501	skeletal system development	0.0121765	26	Alx3/Ano6/Asxl1/Bmi1/Clec3b/Coch/Cyp26b1/Etl4/Fgfr1/Fmn1/Foxn3/Glg1/Ift80/Lnpk/Lrp6/Men1/Nfib/Nipbl/Prkca/Sox5/Sox6/Sulf1/Tbx3/Tgfbr2/Xylt1/Zeb1
GO:0048638	regulation of developmental growth	0.0121854	21	Akap6/Cacna1c/Cdk1/Cxcl12/Ezr/Fgfr1/Foxp1/Insr/Itsn2/Men1/Ncam1/Nedd4l/Nipbl/Ntn1/Pten/Ptk2/Shtn1/Stc2/Tgfbr2/Tgfbr3/Zfpm2
GO:0098609	cell-cell adhesion	0.0123206	33	Adgrl3/Afdn/Bmi1/Cd164/Cd47/Cdh2/Cdh26/Ctnna3/Ctnnd2/Cxcl12/Elmo2/Epo/Ets1/Il12a/Jak2/Kif26b/Lmo7/Lrp6/Lrrc32/Megf10/Ncam1/Ntn1/Pkp4/Podxl2/Prkca/Ptk2/Ptprd/Ptprm/Ripor2/Rock1/Scarf2/Tgfbr2/Xbp1
GO:0032878	regulation of establishment or maintenance of cell polarity	0.0124375	4	Kank1/Ripor2/Rock1/Shtn1
GO:0003143	embryonic heart tube morphogenesis	0.0124991	6	Lrp6/Nphp3/Tbx3/Tead2/Tgfbr2/Vangl2
GO:1901016	regulation of potassium ion transmembrane transporter activity	0.0124991	6	Akap6/Atp1b1/Atp1b3/Nedd4l/Oxsr1/Pten
GO:0035112	genitalia morphogenesis	0.0125329	3	Lrp6/Nipbl/Sycp2
GO:0097242	amyloid-beta clearance	0.0125329	3	Igf1r/Insr/Rock1
GO:0034763	negative regulation of transmembrane transport	0.0127433	9	Epo/Lmbrd1/Nedd4l/Ntsr1/Oxsr1/Pid1/Prkca/Pten/Sri
GO:0050848	regulation of calcium-mediated signaling	0.0133026	8	Akap6/Asph/Camta1/Homer2/Itpr1/Lrrk2/Ncam1/Sri
GO:0032868	response to insulin	0.0133448	14	Foxo1/H2afz/Igf1r/Insr/Irs1/Kank1/Lmbrd1/Pid1/Pkm/Prkca/Pten/Sesn2/Srsf3/Xbp1
GO:0010611	regulation of cardiac muscle hypertrophy	0.0133544	7	Akap6/Foxo1/Foxp1/Mef2a/Prkca/Ptk2/Rock1
GO:0002053	positive regulation of mesenchymal cell proliferation	0.0133954	5	Fgfr1/Foxp1/Irs1/Lrp6/Tgfbr2
GO:1990573	potassium ion import across plasma membrane	0.0133954	5	Atp1a3/Atp1b1/Atp1b3/Kcnj12/Slc12a4
GO:0090257	regulation of muscle system process	0.0136813	15	Akap6/Atp1b1/Cacna1c/Ctnna3/Dock5/Foxo1/Foxp1/Igfbp5/Mef2a/Prkca/Ptk2/Rock1/Slc8a1/Sri/Tnni2
GO:0007517	muscle organ development	0.0138728	22	Akap6/Cd164/Cdk1/Cyp26b1/Epo/Fgfr1/Foxp1/Hivep3/Kmt5b/Lrp6/Megf10/Ncam1/Pten/Rbfox1/Ripor2/Sox6/Tgfbr2/Tgfbr3/Vangl2/Xbp1/Zfp689/Zfpm2
GO:0045927	positive regulation of growth	0.0138951	17	Akap6/Cdk1/Crk/Cxcl12/Ezr/Fgfr1/Insr/Itsn2/Ncam1/Nedd4l/Nipbl/Ntn1/Osbp/Ptk2/Shtn1/Tgfbr3/Zfpm2
GO:0032413	negative regulation of ion transmembrane transporter activity	0.0139714	6	Epo/Nedd4l/Oxsr1/Prkca/Pten/Sri
GO:0046324	regulation of glucose import	0.0139714	6	Insr/Irs1/Lmbrd1/Mef2a/Pid1/Prkca
GO:0060412	ventricular septum morphogenesis	0.0139714	6	Lrp6/Tbx3/Tgfbr2/Tgfbr3/Vangl2/Zfpm2
GO:1901862	negative regulation of muscle tissue development	0.0139714	6	Foxp1/Igfbp5/Lrp6/Pten/Sox6/Tgfbr2
GO:0007266	Rho protein signal transduction	0.0143094	13	Arhgef11/Arhgef37/Cdh2/Cul3/Eps8/Itsn2/Kank1/Mcf2l/Ntn1/Ripor2/Rock1/Shtn1/Vangl2
GO:0031032	actomyosin structure organization	0.0143094	13	Arap1/Cdc42bpa/Cul3/Fhod3/Foxp1/Krt19/Limch1/Mef2a/Nrap/Phactr1/Phldb2/Ppp1r9a/Rock1
GO:0034330	cell junction organization	0.0145174	16	Afdn/Cdh2/Cdh26/Ctnnd2/Fermt2/Fmn1/Limch1/Nedd4l/Phldb2/Pkp4/Prkca/Prkch/Pten/Ptk2/Ptprk/Rock1
GO:1901800	positive regulation of proteasomal protein catabolic process	0.0146696	7	Arih1/Csnk1a1/Hspa1a/Lrrk2/Prickle1/Rnf217/Xbp1
GO:0006929	substrate-dependent cell migration	0.0148106	4	Fbln1/Fgfr1/Ntn1/Shtn1
GO:0022604	regulation of cell morphogenesis	0.015242	27	Arap1/Camk2b/Cdh2/Coch/Crk/Cux2/Cxcl12/Dock5/Eps8/Ezr/Fbln1/Fermt2/Gas2/Itsn2/Kank1/Lrrk2/Nedd4l/Ntn1/Plxnc1/Ppp1r9a/Pten/Ptk2/Ptprd/Sh3d19/Shtn1/Tnik/Trak1
GO:0021955	central nervous system neuron axonogenesis	0.0152845	5	Dclk1/Nfib/Prkca/Pten/Ptk2
GO:0010959	regulation of metal ion transport	0.0153694	21	Akap6/Ano6/Asph/Atp1b1/Atp1b3/Cacna1b/Cxcl12/Dpp6/Epo/Homer2/Itpr1/Kcnab2/Nedd4l/Ntsr1/Oxsr1/Plcb4/Pten/Rgs9/Slc8a1/Sri/Stc2
GO:0006305	DNA alkylation	0.0155604	6	Bend3/Bmi1/Dnmt1/Kmt2a/Prmt5/Tdrd1
GO:0006306	DNA methylation	0.0155604	6	Bend3/Bmi1/Dnmt1/Kmt2a/Prmt5/Tdrd1
GO:0051591	response to cAMP	0.0155604	6	Akap6/Ezr/Igfbp5/Itpr1/Ndufs4/Slc8a1
GO:0014074	response to purine-containing compound	0.0156785	8	Akap6/Asph/Ezr/Igfbp5/Irs1/Itpr1/Ndufs4/Slc8a1
GO:0009896	positive regulation of catabolic process	0.015761	20	Arih1/Csnk1a1/Ezr/Foxo1/Hmgb4/Hspa1a/Insr/Irs1/Lrrk2/Nedd4l/Prickle1/Pten/Ptk2/Rnf217/Rock1/Sesn2/Sh3d19/Smurf2/Snx9/Xbp1
GO:0048706	embryonic skeletal system development	0.0159213	9	Alx3/Bmi1/Etl4/Men1/Nipbl/Sulf1/Tgfbr2/Xylt1/Zeb1
GO:0060048	cardiac muscle contraction	0.0159213	9	Akap6/Atp1a3/Atp1b1/Cacna1c/Ctnna3/Nedd4l/Slc8a1/Sri/Tnni2
GO:0031329	regulation of cellular catabolic process	0.0159937	30	Apex1/Arih1/Atp6v0a1/Ccar2/Csnk1a1/Elavl4/Ercc4/Ezr/Foxo1/Hmgb4/Hspa1a/Insr/Irs1/Laptm4b/Lonp2/Lrrk2/Ppp1cb/Prickle1/Prkag2/Pten/Ptk2/Rnf217/Rock1/Sesn2/Sh3d19/Snx9/Tbc1d14/Tmf1/Usp25/Xbp1
GO:0033160	positive regulation of protein import into nucleus, translocation	0.0161412	3	Cdk1/Jak2/Lrrk2
GO:0036445	neuronal stem cell division	0.0161412	3	Fgfr1/Lrp6/Sox5
GO:0055057	neuroblast division	0.0161412	3	Fgfr1/Lrp6/Sox5
GO:0060019	radial glial cell differentiation	0.0161412	3	Afdn/Cdh2/Lrp6
GO:0051271	negative regulation of cellular component movement	0.0165709	17	Adamts9/Afdn/Apex1/Crk/Cxcl12/Fbln1/Igfbp5/Kank1/Limch1/Phldb2/Pten/Ptk2/Ptprk/Ptprm/Ripor2/Sulf1/Tgfbr3
GO:0008286	insulin receptor signaling pathway	0.0170996	9	Foxo1/Igf1r/Insr/Irs1/Kank1/Lmbrd1/Pid1/Prkca/Srsf3
GO:0010613	positive regulation of cardiac muscle hypertrophy	0.0173437	5	Akap6/Mef2a/Prkca/Ptk2/Rock1
GO:0014742	positive regulation of muscle hypertrophy	0.0173437	5	Akap6/Mef2a/Prkca/Ptk2/Rock1
GO:0035272	exocrine system development	0.0173437	5	Fgfr1/Igf1r/Insr/Nfib/Xbp1
GO:0043268	positive regulation of potassium ion transport	0.0173437	5	Akap6/Ano6/Atp1b1/Atp1b3/Dpp6
GO:0060047	heart contraction	0.0177098	13	Akap6/Atp1a3/Atp1b1/Cacna1b/Cacna1c/Ctnna3/Jak2/Mef2a/Nedd4l/Prkca/Slc8a1/Sri/Tnni2
GO:0045931	positive regulation of mitotic cell cycle	0.0178509	10	Apex1/Cdk1/Cul3/Dync1li1/Fgfr1/Igf1r/Insr/Nipbl/Prkca/Smc5
GO:0061136	regulation of proteasomal protein catabolic process	0.0178509	10	Arih1/Ccar2/Csnk1a1/Hspa1a/Lrrk2/Prickle1/Rnf217/Tmf1/Usp25/Xbp1
GO:0098739	import across plasma membrane	0.0183472	8	Atp1a3/Atp1b1/Atp1b3/Kcnj12/Ntsr1/Slc12a4/Slc8a1/Slc9a9
GO:0061448	connective tissue development	0.0188276	17	Coch/Fgfr1/Fgl1/Gdf7/Glg1/Ift80/Lnpk/Lrp6/Nfib/Prkca/Slc25a25/Sox5/Sox6/Sulf1/Tgfbr2/Xbp1/Zeb1
GO:0007088	regulation of mitotic nuclear division	0.0190198	10	Cdc27/Cul3/Cul9/Dync1li1/Hspa1a/Igf1r/Insr/Nipbl/Ripor2/Smc5
GO:0051893	regulation of focal adhesion assembly	0.019105	6	Fmn1/Limch1/Phldb2/Pten/Ptk2/Rock1
GO:0055117	regulation of cardiac muscle contraction	0.019105	6	Akap6/Atp1b1/Cacna1c/Ctnna3/Slc8a1/Sri
GO:0090109	regulation of cell-substrate junction assembly	0.019105	6	Fmn1/Limch1/Phldb2/Pten/Ptk2/Rock1
GO:0030004	cellular monovalent inorganic cation homeostasis	0.0191659	7	Atp1a3/Atp1b1/Atp1b3/Atp6v0a1/Lrrk2/Slc8a1/Slc9a9
GO:0010107	potassium ion import	0.0195785	5	Atp1a3/Atp1b1/Atp1b3/Kcnj12/Slc12a4
GO:0016358	dendrite development	0.0196301	17	Arid1b/Asap1/Camk2b/Ctnnd2/Cux2/Dclk1/Elavl4/Fmn1/Kidins220/Lrrk2/Mef2a/Nedd4l/Ppp1r9a/Pten/Ptprd/Tnik/Trak1
GO:0016571	histone methylation	0.0196455	9	Bend3/Dnmt1/Kmt2a/Kmt5b/Men1/Nsd1/Prmt5/Rif1/Xbp1
GO:0010720	positive regulation of cell development	0.0202444	31	Akap6/Camk2b/Crk/Cux2/Cxcl12/Dock5/Elavl4/Epo/Fgfr1/Fig4/Gdf7/Igf1r/Itsn2/Jade2/Kidins220/Lrp6/Nedd4l/Nipbl/Nkx2-2os/Ntn1/Plxnc1/Ppp1r9a/Prkch/Prmt5/Pten/Ptk2/Ptprd/Shtn1/Tcf4/Trak1/Zeb1
GO:0036336	dendritic cell migration	0.0202704	3	Ano6/Eps8/Il12a
GO:0050901	leukocyte tethering or rolling	0.0202704	3	Cxcl12/Podxl2/Rock1
GO:0060026	convergent extension	0.0202704	3	Lrp6/Nphp3/Vangl2
GO:0062033	positive regulation of mitotic sister chromatid segregation	0.0202704	3	Cul3/Nipbl/Smc5
GO:0055075	potassium ion homeostasis	0.0203668	4	Atp1a3/Atp1b1/Atp1b3/Slc12a4
GO:0046683	response to organophosphorus	0.0208579	7	Akap6/Asph/Ezr/Igfbp5/Itpr1/Ndufs4/Slc8a1
GO:0010256	endomembrane system organization	0.0208746	18	Ano6/Asap1/Cdk1/Cog4/Csnk1a1/Laptm4b/Lnpk/Lrrk2/Parp11/Pi4k2a/Prmt5/Pten/Rab27a/Rab2a/Sec61a1/Shtn1/Snx9/Tmf1
GO:0032436	positive regulation of proteasomal ubiquitin-dependent protein catabolic process	0.0210684	6	Arih1/Csnk1a1/Hspa1a/Lrrk2/Prickle1/Rnf217
GO:0010769	regulation of cell morphogenesis involved in differentiation	0.021146	19	Camk2b/Cdh2/Crk/Cux2/Cxcl12/Dock5/Fbln1/Kank1/Lrrk2/Nedd4l/Ntn1/Plxnc1/Ppp1r9a/Pten/Ptk2/Ptprd/Shtn1/Tnik/Trak1
GO:0035051	cardiocyte differentiation	0.0212036	12	Akap6/Fhod3/Foxp1/Lrp6/Mef2a/Nrap/Prickle1/Slc8a1/Sox6/Tbx3/Tgfbr3/Vangl2
GO:0043502	regulation of muscle adaptation	0.0213265	8	Akap6/Foxo1/Foxp1/Igfbp5/Mef2a/Prkca/Ptk2/Rock1
GO:0035265	organ growth	0.0216889	13	Akap6/Cacna1c/Cdk1/Coch/Fgfr1/Foxp1/Men1/Ncam1/Pten/Ptk2/Tgfbr2/Tgfbr3/Zfpm2
GO:0061001	regulation of dendritic spine morphogenesis	0.0219941	5	Camk2b/Cux2/Lrrk2/Ppp1r9a/Pten
GO:0050769	positive regulation of neurogenesis	0.0222534	28	Camk2b/Cux2/Cxcl12/Elavl4/Epo/Fgfr1/Fig4/Gdf7/Igf1r/Itsn2/Jade2/Kidins220/Lrp6/Nedd4l/Nipbl/Nkx2-2os/Ntn1/Plxnc1/Ppp1r9a/Prkch/Prmt5/Pten/Ptk2/Ptprd/Shtn1/Tcf4/Trak1/Zeb1
GO:0034766	negative regulation of ion transmembrane transport	0.0226511	7	Epo/Nedd4l/Ntsr1/Oxsr1/Prkca/Pten/Sri
GO:0035967	cellular response to topologically incorrect protein	0.0226511	7	Atf6/Cul3/Dnajb12/Hspa1a/Parp16/Stc2/Xbp1
GO:0016051	carbohydrate biosynthetic process	0.0227746	11	B3gnt2/Fbp2/Foxo1/Gpd2/Hs2st1/Insr/Irs1/Ntsr1/Ppp1cb/Sesn2/St3gal2
GO:0016055	Wnt signaling pathway	0.0227831	22	Ccar2/Cdh2/Csnk1a1/Ctnnd2/Cul3/Fermt2/Foxo1/Grk5/Ift80/Kank1/Leo1/Lrp6/Lrrfip2/Lrrk2/Nphp3/Prickle1/Pten/Ror1/Sulf1/Tnik/Vangl2/Znrf3
GO:0010927	cellular component assembly involved in morphogenesis	0.0229379	8	Fhod3/Fig4/Foxp1/Krt19/Mef2a/Nrap/Phldb2/Tmf1
GO:0031060	regulation of histone methylation	0.0231639	6	Dnmt1/Kmt2a/Men1/Nsd1/Rif1/Xbp1
GO:0051785	positive regulation of nuclear division	0.0231639	6	Camk2b/Cul3/Igf1r/Insr/Nipbl/Smc5
GO:1903580	positive regulation of ATP metabolic process	0.0235646	4	Bend3/Cdk1/Insr/Pid1
GO:0034764	positive regulation of transmembrane transport	0.0239123	13	Akap6/Ano6/Asph/Atp1b1/Atp1b3/Dpp6/Insr/Irs1/Mef2a/Nedd4l/Ntsr1/Rgs9/Sri
GO:2000058	regulation of ubiquitin-dependent protein catabolic process	0.0239624	9	Arih1/Ccar2/Csnk1a1/Hspa1a/Lrrk2/Prickle1/Pten/Ptk2/Rnf217
GO:0198738	cell-cell signaling by wnt	0.0243533	22	Ccar2/Cdh2/Csnk1a1/Ctnnd2/Cul3/Fermt2/Foxo1/Grk5/Ift80/Kank1/Leo1/Lrp6/Lrrfip2/Lrrk2/Nphp3/Prickle1/Pten/Ror1/Sulf1/Tnik/Vangl2/Znrf3
GO:0045862	positive regulation of proteolysis	0.0245405	16	Arih1/Asph/Clec3b/Cradd/Csnk1a1/Hspa1a/Jak2/Lrrk2/Men1/Prickle1/Pten/Ptk2/Rnf217/Sh3d19/Snx9/Xbp1
GO:0070252	actin-mediated cell contraction	0.024548	7	Akap6/Cacna1c/Ctnna3/Nedd4l/Rock1/Shtn1/Sri
GO:0001947	heart looping	0.0245952	5	Lrp6/Nphp3/Tbx3/Tgfbr2/Vangl2
GO:0015698	inorganic anion transport	0.0246331	8	Ank/Ano10/Ano2/Ano6/Fgfr1/Gabrr2/Slc12a4/Stc2
GO:0055006	cardiac cell development	0.0246331	8	Akap6/Fhod3/Foxp1/Mef2a/Nrap/Slc8a1/Tbx3/Tgfbr3
GO:0006817	phosphate ion transport	0.0249241	3	Ank/Fgfr1/Stc2
GO:0051497	negative regulation of stress fiber assembly	0.0249241	3	Arap1/Phldb2/Ppp1r9a
GO:0071545	inositol phosphate catabolic process	0.0249241	3	Impa1/Ntsr1/Pten
GO:2000810	regulation of bicellular tight junction assembly	0.0249241	3	Nedd4l/Prkch/Rock1
GO:0003015	heart process	0.0250853	13	Akap6/Atp1a3/Atp1b1/Cacna1b/Cacna1c/Ctnna3/Jak2/Mef2a/Nedd4l/Prkca/Slc8a1/Sri/Tnni2
GO:0060997	dendritic spine morphogenesis	0.025395	6	Camk2b/Ctnnd2/Cux2/Lrrk2/Ppp1r9a/Pten
GO:0051783	regulation of nuclear division	0.0254071	11	Camk2b/Cdc27/Cul3/Cul9/Dync1li1/Hspa1a/Igf1r/Insr/Nipbl/Ripor2/Smc5
GO:0050680	negative regulation of epithelial cell proliferation	0.0255408	9	Ift80/Lrp6/Men1/Nfib/Pten/Ptprk/Ptprm/Sulf1/Tgfbr3
GO:1904064	positive regulation of cation transmembrane transport	0.0257196	10	Akap6/Ano6/Asph/Atp1b1/Atp1b3/Dpp6/Nedd4l/Ntsr1/Rgs9/Sri
GO:0008645	hexose transmembrane transport	0.0264141	8	Insr/Irs1/Lmbrd1/Mef2a/Pid1/Prkca/Sesn2/Slc2a2
GO:1904659	glucose transmembrane transport	0.0264141	8	Insr/Irs1/Lmbrd1/Mef2a/Pid1/Prkca/Sesn2/Slc2a2
GO:0001570	vasculogenesis	0.0265511	7	Epo/Fgfr1/Ptk2/Tead2/Tgfbr2/Tgfbr3/Zfpm2
GO:0086065	cell communication involved in cardiac conduction	0.0270501	4	Cacna1c/Ctnna3/Slc8a1/Sri
GO:0045840	positive regulation of mitotic nuclear division	0.0273861	5	Cul3/Igf1r/Insr/Nipbl/Smc5
GO:0034637	cellular carbohydrate biosynthetic process	0.0277647	6	B3gnt2/Fbp2/Hs2st1/Insr/Irs1/Ppp1cb
GO:0015749	monosaccharide transmembrane transport	0.0282828	8	Insr/Irs1/Lmbrd1/Mef2a/Pid1/Prkca/Sesn2/Slc2a2
GO:0090068	positive regulation of cell cycle process	0.0288591	13	Apex1/Camk2b/Cdk1/Cradd/Cul3/Dync1li1/Fgfr1/Igf1r/Insr/Nipbl/Pkp4/Ripor2/Smc5
GO:0044262	cellular carbohydrate metabolic process	0.029467	15	B3gnt2/Fbp2/Fgl1/Foxo1/Hs2st1/Igfbp5/Impa1/Insr/Irs1/Ntsr1/Ppp1cb/Ppp3r2/Prkag2/Pten/Sesn2
GO:0031100	animal organ regeneration	0.0301017	3	Cdk1/Cxcl12/Pkm
GO:0046174	polyol catabolic process	0.0301017	3	Impa1/Ntsr1/Pten
GO:0046325	negative regulation of glucose import	0.0301017	3	Lmbrd1/Pid1/Prkca
GO:1904385	cellular response to angiotensin	0.0301017	3	Igf1r/Irs1/Rock1
GO:1990776	response to angiotensin	0.0301017	3	Igf1r/Irs1/Rock1
GO:0014896	muscle hypertrophy	0.030241	8	Akap6/Foxo1/Foxp1/Igfbp5/Mef2a/Prkca/Ptk2/Rock1
GO:0014897	striated muscle hypertrophy	0.030241	8	Akap6/Foxo1/Foxp1/Igfbp5/Mef2a/Prkca/Ptk2/Rock1
GO:0034219	carbohydrate transmembrane transport	0.030241	8	Insr/Irs1/Lmbrd1/Mef2a/Pid1/Prkca/Sesn2/Slc2a2
GO:0048814	regulation of dendrite morphogenesis	0.030241	8	Camk2b/Cux2/Lrrk2/Nedd4l/Ppp1r9a/Pten/Ptprd/Tnik
GO:1903391	regulation of adherens junction organization	0.0302761	6	Fmn1/Limch1/Phldb2/Pten/Ptk2/Rock1
GO:0033047	regulation of mitotic sister chromatid segregation	0.0303704	5	Cdc27/Cul3/Dync1li1/Nipbl/Smc5
GO:0097305	response to alcohol	0.0304712	10	Cdk1/Eps8/Igf1r/Lrp6/Mir125b-1/Mir152/Prkca/Pten/Tgfbr2/Tgfbr3
GO:0001101	response to acid chemical	0.0306965	15	Asxl1/Cyp26b1/Dnmt1/Foxp1/Igf1r/Lrp6/Mir107/Mirlet7i/Pid1/Ppp5c/Sesn2/Tead2/Tgfbr3/Xbp1/Zeb1
GO:0060977	coronary vasculature morphogenesis	0.0308274	4	Epo/Fgfr1/Tgfbr3/Zfpm2
GO:0061647	histone H3-K9 modification	0.0308274	4	Bend3/Dnmt1/Kmt2a/Rif1
GO:0003151	outflow tract morphogenesis	0.0308854	7	Lrp6/Nipbl/Tbx3/Tgfbr2/Tgfbr3/Vangl2/Zfpm2
GO:1905114	cell surface receptor signaling pathway involved in cell-cell signaling	0.0315962	25	Ccar2/Cdh2/Csnk1a1/Ctnnd2/Cul3/Cux2/Fermt2/Foxo1/Grk5/Ift80/Kank1/Leo1/Lrp6/Lrrfip2/Lrrk2/Nphp3/Ntsr1/Ppp1r9a/Prickle1/Pten/Ror1/Sulf1/Tnik/Vangl2/Znrf3
GO:0008277	regulation of G protein-coupled receptor signaling pathway	0.0322903	8	Camk2b/Frmpd1/Grk5/Homer2/Lrrk2/Prmt5/Rgs9/Rock1
GO:0032411	positive regulation of transporter activity	0.0322903	8	Akap6/Asph/Atp1b1/Atp1b3/Kmt2a/Nedd4l/Ntsr1/Rgs9
GO:0051962	positive regulation of nervous system development	0.0325908	30	Adgrl3/Camk2b/Cux2/Cxcl12/Elavl4/Epo/Fgfr1/Fig4/Gdf7/Igf1r/Itsn2/Jade2/Kidins220/Lrp6/Nedd4l/Nipbl/Nkx2-2os/Ntn1/Plxnc1/Ppp1r9a/Prkca/Prkch/Prmt5/Pten/Ptk2/Ptprd/Shtn1/Tcf4/Trak1/Zeb1
GO:0061572	actin filament bundle organization	0.0329433	11	Arap1/Cul3/Eps8/Ezr/Limch1/Marcks/Phactr1/Phldb2/Ppp1r9a/Rock1/Shtn1
GO:0051216	cartilage development	0.0330313	13	Coch/Fgfr1/Glg1/Ift80/Lnpk/Lrp6/Nfib/Prkca/Sox5/Sox6/Sulf1/Tgfbr2/Zeb1
GO:0060443	mammary gland morphogenesis	0.0335515	5	Igfbp5/Lrp6/Ntn1/Tbx3/Tgfbr2
GO:0061371	determination of heart left/right asymmetry	0.0335515	5	Lrp6/Nphp3/Tbx3/Tgfbr2/Vangl2
GO:2001021	negative regulation of response to DNA damage stimulus	0.0335515	5	Ccar2/Cxcl12/Ercc4/Rif1/Trip12
GO:0019827	stem cell population maintenance	0.0339643	10	Cdh2/Fgfr1/Foxo1/Ldb2/Leo1/Nipbl/Rif1/Tbx3/Vangl2/Zhx2
GO:0032409	regulation of transporter activity	0.0339916	14	Akap6/Asph/Atp1b1/Atp1b3/Epo/Insr/Kmt2a/Nedd4l/Ntsr1/Oxsr1/Prkca/Pten/Rgs9/Sri
GO:0030048	actin filament-based movement	0.0344324	8	Akap6/Cacna1c/Ctnna3/Nedd4l/Rock1/Shtn1/Sri/Wipf1
GO:0045123	cellular extravasation	0.0348996	4	Cxcl12/Podxl2/Ripor2/Rock1
GO:0043279	response to alkaloid	0.0357338	6	Adgrl3/Homer2/Irs1/Ncam1/Ppp5c/Slc8a1
GO:0045471	response to ethanol	0.0357338	6	Cdk1/Eps8/Igf1r/Mir152/Prkca/Pten
GO:1904063	negative regulation of cation transmembrane transport	0.0357338	6	Epo/Nedd4l/Ntsr1/Oxsr1/Pten/Sri
GO:0018126	protein hydroxylation	0.0357989	3	Asph/Egln3/P3h4
GO:0035024	negative regulation of Rho protein signal transduction	0.0357989	3	Cul3/Kank1/Ripor2
GO:0045292	mRNA cis splicing, via spliceosome	0.0357989	3	Dcps/Srsf3/Wbp4
GO:0048311	mitochondrion distribution	0.0357989	3	Lrrk2/Mef2a/Trak1
GO:0051085	chaperone cofactor-dependent protein refolding	0.0357989	3	Dnajb12/Dnajb14/Hspa1a
GO:0055090	acylglycerol homeostasis	0.0357989	3	Pla2g12b/Sesn2/Xbp1
GO:0070328	triglyceride homeostasis	0.0357989	3	Pla2g12b/Sesn2/Xbp1
GO:0097062	dendritic spine maintenance	0.0357989	3	Abhd17b/Igf1r/Insr
GO:1905208	negative regulation of cardiocyte differentiation	0.0357989	3	Foxp1/Prickle1/Sox6
GO:0043954	cellular component maintenance	0.0369321	5	Abhd17b/Afdn/Igf1r/Insr/Lnpk
GO:1900024	regulation of substrate adhesion-dependent cell spreading	0.0369321	5	Crk/Dock5/Fbln1/Kank1/Ptk2
GO:2000736	regulation of stem cell differentiation	0.0369321	5	N4bp2l2/Prickle1/Sox5/Sox6/Tead2
GO:0007265	Ras protein signal transduction	0.0379107	20	Arhgef11/Arhgef37/Cdh2/Crk/Cul3/Dennd1a/Dnmt1/Epo/Eps8/Itsn2/Kank1/Mcf2l/Ntn1/Psd/Rab27a/Rab2a/Ripor2/Rock1/Shtn1/Vangl2
GO:0007179	transforming growth factor beta receptor signaling pathway	0.0381598	11	Fermt2/Glg1/Lrrc32/Men1/Ptk2/Ptprk/Smurf2/Tgfbr2/Tgfbr3/Xbp1/Zeb1
GO:0007605	sensory perception of sound	0.0381598	11	Coch/Fgfr1/Homer2/Kcnq4/Mir107/Mir125b-1/Mir146/Mir152/Nipbl/Ripor2/Ror1
GO:0044264	cellular polysaccharide metabolic process	0.0382379	7	B3gnt2/Hs2st1/Insr/Irs1/Ppp1cb/Ppp3r2/Prkag2
GO:0006942	regulation of striated muscle contraction	0.0386847	6	Akap6/Atp1b1/Cacna1c/Ctnna3/Slc8a1/Sri
GO:0043267	negative regulation of potassium ion transport	0.0392685	4	Nedd4l/Oxsr1/Plcb4/Pten
GO:0045981	positive regulation of nucleotide metabolic process	0.0392685	4	Bend3/Cdk1/Insr/Pid1
GO:0060325	face morphogenesis	0.0392685	4	Asph/Lrp6/Nipbl/Specc1l
GO:0090075	relaxation of muscle	0.0392685	4	Akap6/Atp1b1/Slc8a1/Sri
GO:1900544	positive regulation of purine nucleotide metabolic process	0.0392685	4	Bend3/Cdk1/Insr/Pid1
GO:1903523	negative regulation of blood circulation	0.0392685	4	Dock5/Jak2/Prkca/Sri
GO:1903047	mitotic cell cycle process	0.039479	25	Apex1/Camk2b/Cdc27/Cdk1/Cradd/Ctdsp1/Cul3/Cul9/D7Ertd443e/Dync1li1/E2f6/Eps8/Fbxl18/Fbxl7/Fgfr1/Hspa1a/Igf1r/Insr/Nipbl/Pten/Ripor2/Smc5/Snx18/Snx9/Tubg2
GO:0035107	appendage morphogenesis	0.0397144	10	Alx3/Asph/Cacna1c/Cyp26b1/Fgfr1/Fmn1/Lnpk/Lrp6/Nipbl/Tbx3
GO:0035108	limb morphogenesis	0.0397144	10	Alx3/Asph/Cacna1c/Cyp26b1/Fgfr1/Fmn1/Lnpk/Lrp6/Nipbl/Tbx3
GO:0034762	regulation of transmembrane transport	0.0405589	25	Akap6/Ano6/Asph/Atp1b1/Atp1b3/Cacna1b/Cacna1c/Dpp6/Epo/Insr/Irs1/Kcnab2/Kcnj12/Kcnq4/Lmbrd1/Mef2a/Nedd4l/Ntsr1/Oxsr1/Pid1/Prkca/Pten/Rgs9/Slc8a1/Sri
GO:0008643	carbohydrate transport	0.0408904	9	Ezr/Insr/Irs1/Lmbrd1/Mef2a/Pid1/Prkca/Sesn2/Slc2a2
GO:0031058	positive regulation of histone modification	0.040923	7	Dnmt1/Kmt2a/Lrrk2/Men1/Nipbl/Rif1/Xbp1
GO:0035966	response to topologically incorrect protein	0.0414307	8	Atf6/Cul3/Dnajb12/Edem3/Hspa1a/Parp16/Stc2/Xbp1
GO:0010810	regulation of cell-substrate adhesion	0.0416109	12	Crk/Dock5/Fbln1/Fmn1/Jak2/Kank1/Limch1/Men1/Phldb2/Pten/Ptk2/Rock1
GO:0051147	regulation of muscle cell differentiation	0.0417714	10	Akap6/Cxcl12/Cyp26b1/Dnmt1/Foxp1/Megf10/Ripor2/Sox6/Xbp1/Zeb1
GO:0098727	maintenance of cell number	0.0417714	10	Cdh2/Fgfr1/Foxo1/Ldb2/Leo1/Nipbl/Rif1/Tbx3/Vangl2/Zhx2
GO:0033158	regulation of protein import into nucleus, translocation	0.042008	3	Cdk1/Jak2/Lrrk2
GO:0050849	negative regulation of calcium-mediated signaling	0.042008	3	Homer2/Itpr1/Sri
GO:1901017	negative regulation of potassium ion transmembrane transporter activity	0.042008	3	Nedd4l/Oxsr1/Pten
GO:1901018	positive regulation of potassium ion transmembrane transporter activity	0.042008	3	Akap6/Atp1b1/Atp1b3
GO:1901889	negative regulation of cell junction assembly	0.042008	3	Phldb2/Pten/Rock1
GO:0010498	proteasomal protein catabolic process	0.0422898	19	Arih1/Ccar2/Csnk1a1/Cul3/Dnajb12/Edem3/Fbxl18/Fbxl7/Hspa1a/Lrrk2/Nedd4l/Prickle1/Psmb7/Rnf217/Smurf2/Tmf1/Ube2u/Usp25/Xbp1
GO:0031056	regulation of histone modification	0.043169	9	Dnmt1/Kmt2a/Lrrk2/Men1/Nipbl/Nsd1/Rif1/Trip12/Xbp1
GO:0010975	regulation of neuron projection development	0.0433625	28	Asap1/Camk2b/Cdh2/Cux2/Cxcl12/Dync1i2/Elavl4/Epo/Fgfr1/Fig4/Igf1r/Itsn2/Kank1/Kidins220/Lrp6/Lrrk2/Nedd4l/Nr2f1/Ntn1/Plxnc1/Ppp1r9a/Pten/Ptk2/Ptprd/Shtn1/Tnik/Trak1/Xylt1
GO:0034767	positive regulation of ion transmembrane transport	0.0439	10	Akap6/Ano6/Asph/Atp1b1/Atp1b3/Dpp6/Nedd4l/Ntsr1/Rgs9/Sri
GO:1990823	response to leukemia inhibitory factor	0.0439275	11	B3gnt2/Egln3/Eps8/Mir125b-1/Mir146/Mir152/Mirlet7i/Parp16/Rif1/Srsf3/Xbp1
GO:1990830	cellular response to leukemia inhibitory factor	0.0439275	11	B3gnt2/Egln3/Eps8/Mir125b-1/Mir146/Mir152/Mirlet7i/Parp16/Rif1/Srsf3/Xbp1
GO:0006289	nucleotide-excision repair	0.0439351	4	Ercc4/Fan1/Polk/Uvssa
GO:0032784	regulation of DNA-templated transcription, elongation	0.0439351	4	Ccar2/Ell2/Leo1/Zmynd11
GO:0086004	regulation of cardiac muscle cell contraction	0.0439351	4	Akap6/Cacna1c/Ctnna3/Sri
GO:0043500	muscle adaptation	0.0439586	8	Akap6/Foxo1/Foxp1/Igfbp5/Mef2a/Prkca/Ptk2/Rock1
GO:0010812	negative regulation of cell-substrate adhesion	0.0443003	5	Fbln1/Kank1/Men1/Phldb2/Pten
GO:0033692	cellular polysaccharide biosynthetic process	0.0443003	5	B3gnt2/Hs2st1/Insr/Irs1/Ppp1cb
GO:0045843	negative regulation of striated muscle tissue development	0.0443003	5	Foxp1/Lrp6/Pten/Sox6/Tgfbr2
GO:0003012	muscle system process	0.045036	19	Akap6/Atp1a3/Atp1b1/Cacna1c/Ctnna3/Dock5/Foxo1/Foxp1/Igfbp5/Mef2a/Nedd4l/Prkca/Ptk2/Rap1gds1/Rock1/Slc8a1/Sri/Sulf1/Tnni2
GO:0140014	mitotic nuclear division	0.0453686	12	Cdc27/Cul3/Cul9/Dync1li1/Eps8/Hspa1a/Igf1r/Insr/Nipbl/Ripor2/Smc5/Tubg2
GO:0000375	RNA splicing, via transesterification reactions	0.0459764	11	Dcps/Ddx20/Ppil1/Prmt5/Ptbp2/Rbfox1/Sf3b6/Snrpa1/Srsf3/Tra2b/Wbp4
GO:0000377	RNA splicing, via transesterification reactions with bulged adenosine as nucleophile	0.0459764	11	Dcps/Ddx20/Ppil1/Prmt5/Ptbp2/Rbfox1/Sf3b6/Snrpa1/Srsf3/Tra2b/Wbp4
GO:0000398	mRNA splicing, via spliceosome	0.0459764	11	Dcps/Ddx20/Ppil1/Prmt5/Ptbp2/Rbfox1/Sf3b6/Snrpa1/Srsf3/Tra2b/Wbp4
GO:0032103	positive regulation of response to external stimulus	0.0462525	13	Ano6/Cd47/Cdk19/Cxcl12/Ets1/Fgfr1/Igf1r/Il12a/Jak2/Lrrk2/Oxsr1/Prkca/Ripor2
GO:0018210	peptidyl-threonine modification	0.0465861	8	Cdk1/Csnk1a1/Galnt1/Lrrk2/Oxsr1/Prkag2/Prkca/Tgfbr2
GO:0030038	contractile actin filament bundle assembly	0.0466541	7	Arap1/Cul3/Limch1/Phactr1/Phldb2/Ppp1r9a/Rock1
GO:0035725	sodium ion transmembrane transport	0.0466541	7	Ano6/Atp1a3/Atp1b1/Atp1b3/Nedd4l/Slc8a1/Slc9a9
GO:0043149	stress fiber assembly	0.0466541	7	Arap1/Cul3/Limch1/Phactr1/Phldb2/Ppp1r9a/Rock1
GO:0055013	cardiac muscle cell development	0.0466541	7	Akap6/Fhod3/Foxp1/Mef2a/Nrap/Slc8a1/Tbx3
GO:0030010	establishment of cell polarity	0.0479786	9	Cyp26b1/Frmd4a/Igf1r/Kank1/Kif26b/Ripor2/Rock1/Shtn1/Vangl2
GO:0003229	ventricular cardiac muscle tissue development	0.0482909	5	Adamts9/Epo/Tbx3/Tgfbr3/Zfpm2
GO:0010171	body morphogenesis	0.0482909	5	Asph/Lrp6/Nipbl/Phldb2/Specc1l
GO:0043967	histone H4 acetylation	0.0482909	5	Bend3/Ep400/Jade2/Kmt2a/Msl1
GO:0048635	negative regulation of muscle organ development	0.0482909	5	Foxp1/Lrp6/Pten/Sox6/Tgfbr2
GO:0061337	cardiac conduction	0.0482909	5	Cacna1c/Ctnna3/Mef2a/Slc8a1/Sri
GO:0005979	regulation of glycogen biosynthetic process	0.0487187	3	Insr/Irs1/Ppp1cb
GO:0010962	regulation of glucan biosynthetic process	0.0487187	3	Insr/Irs1/Ppp1cb
GO:0051446	positive regulation of meiotic cell cycle	0.0487187	3	Camk2b/Igf1r/Insr
GO:1903649	regulation of cytoplasmic transport	0.0487187	3	Eipr1/Ezr/Lrrk2
GO:0007157	heterophilic cell-cell adhesion via plasma membrane cell adhesion molecules	0.0488989	4	Cd164/Cdh2/Ptprd/Scarf2
GO:0035137	hindlimb morphogenesis	0.0488989	4	Alx3/Fmn1/Lrp6/Tbx3
GO:0048854	brain morphogenesis	0.0488989	4	Afdn/Cdh2/Gdf7/Pten
GO:0014812	muscle cell migration	0.0497025	7	Apex1/Crk/Dock5/Igfbp5/Megf10/Ptk2/Rock1
GO:0021987	cerebral cortex development	0.0497025	7	Afdn/Cdh2/Fgfr1/Lrp6/Nr2f1/Tra2b/Trappc9
GO:0032434	regulation of proteasomal ubiquitin-dependent protein catabolic process	0.0497025	7	Arih1/Ccar2/Csnk1a1/Hspa1a/Lrrk2/Prickle1/Rnf217
GO:0000280	nuclear division	0.0499483	16	Camk2b/Cdc27/Cul3/Cul9/Cyp26b1/Dync1li1/Eps8/Ercc4/Hspa1a/Igf1r/Insr/Nipbl/Ripor2/Smc5/Sycp2/Tubg2

## Sheet: HippocampusPSWTvsCtrlWTHypo
Dataset 2: Hypo DhMR-associated gene ontologies
Hippocampus
PS WT vs Control WT
GO ID	Description	P-value	# of genes	Gene Symbol
GO:0045651	positive regulation of macrophage differentiation	0.000754519	4	Fadd/Lif/Ror2/Tgfb1
GO:0043254	regulation of protein complex assembly	0.00152359	23	Arhgap18/Arpc5/Asap1/Atf7ip/Baiap2l1/Cck/Dact1/Fhod3/Fmn1/Hnf1a/Insm1/Ldlrad4/Map1b/Nav3/Ncam1/Nck2/Plekhg2/Prkcz/Psen2/Rims1/Tgfb1/Tmod1/Vps11
GO:0015813	L-glutamate transmembrane transport	0.00153042	4	Ntsr1/Slc1a3/Slc1a6/Slc25a13
GO:1901385	regulation of voltage-gated calcium channel activity	0.00214228	5	Ahnak/Cacna1a/Nos1ap/Stac2/Stac3
GO:0045649	regulation of macrophage differentiation	0.00273572	4	Fadd/Lif/Ror2/Tgfb1
GO:0051899	membrane depolarization	0.00310138	8	Adora2a/Bok/Cacna1a/Cacna1i/Cck/Ntsr1/Prkcz/Scn8a
GO:0061061	muscle structure development	0.00317718	32	Adarb1/Arid5b/Cops2/Dll4/Ephb1/Fhod3/Hacd1/Hes1/Lif/Mbnl1/Megf10/Msc/Myl2/Mylpf/Ncam1/Neb/Npnt/Pik3r1/Qk/Scn8a/Ski/Slc8a1/Smyd3/Sox15/Stac3/Tcf7l2/Tgfb1/Tmod1/Wisp1/Wnt7b/Zfhx3/Zfpm1
GO:0030010	establishment of cell polarity	0.00319863	11	Ephb1/Fez1/Frmd4a/Hes1/Map1b/Pax6/Prickle2/Prkcz/Ptk7/Scrib/Ust
GO:0046626	regulation of insulin receptor signaling pathway	0.00333776	7	Baiap2l1/Irs1/Pid1/Pik3r1/Prkcz/Ptprf/Zbtb7b
GO:0006855	drug transmembrane transport	0.00494016	6	Abcc1/Abcc4/Ntsr1/Slc1a3/Slc1a6/Slc25a13
GO:1900076	regulation of cellular response to insulin stimulus	0.00526535	7	Baiap2l1/Irs1/Pid1/Pik3r1/Prkcz/Ptprf/Zbtb7b
GO:0042063	gliogenesis	0.00569924	17	Adora2a/Daam2/Etv5/Hes1/Lamb1/Lif/Ndrg1/Pax6/Qk/Ror2/Scrib/Ski/Sox5/Srgap2/Tcf7l2/Tenm4/Tgfb1
GO:0015908	fatty acid transport	0.00585636	7	Abcc1/Abcc4/Cpt1c/Hnf1a/Ntsr1/Repin1/Slc25a17
GO:0060603	mammary gland duct morphogenesis	0.00616755	5	Btrc/Etv5/Scrib/Tfap2c/Tgfb1
GO:0061351	neural precursor cell proliferation	0.00625555	12	Dct/Dll4/Eml1/Ephb1/Fzd9/Insm1/Melk/Pax6/Sox5/Tacc1/Tgfb1/Wnt7b
GO:0048709	oligodendrocyte differentiation	0.00672983	8	Daam2/Hes1/Pax6/Qk/Sox5/Tcf7l2/Tenm4/Tgfb1
GO:0007274	neuromuscular synaptic transmission	0.00681467	4	Adarb1/Cacna1a/Etv5/Stac3
GO:1902475	L-alpha-amino acid transmembrane transport	0.00681467	4	Ntsr1/Slc1a3/Slc1a6/Slc25a13
GO:0007163	establishment or maintenance of cell polarity	0.00684363	14	Arpc5/Ckap5/Ephb1/Fez1/Frmd4a/Hes1/Map1b/Pax6/Prickle2/Prkcz/Ptk7/Scrib/Ust/Wnt7b
GO:0007517	muscle organ development	0.00744526	21	Adarb1/Arid5b/Cops2/Dll4/Ephb1/Lif/Mbnl1/Megf10/Msc/Myl2/Mylpf/Ncam1/Scn8a/Ski/Sox15/Stac3/Tcf7l2/Tgfb1/Wisp1/Zfhx3/Zfpm1
GO:0006919	activation of cysteine-type endopeptidase activity involved in apoptotic process	0.0080369	6	Bok/Cck/Col4a3/Dlc1/Mtch1/Nod1
GO:0003338	metanephros morphogenesis	0.00824498	4	Fmn1/Hes1/Lif/Wnt7b
GO:0008286	insulin receptor signaling pathway	0.00828754	9	Baiap2l1/Foxo6/Irs1/Pid1/Pik3r1/Prkcz/Ptprf/Sh2b2/Zbtb7b
GO:0031000	response to caffeine	0.00903866	3	Adora2a/Irs1/Slc8a1
GO:0036270	response to diuretic	0.00903866	3	Adora2a/Irs1/Slc8a1
GO:0048505	regulation of timing of cell differentiation	0.00903866	3	Hes1/Pax6/Sox5
GO:0051668	localization within membrane	0.00947382	12	Arl6/Cacna1a/Cdh13/Dnm3/Etv5/Fzd9/Pacsin1/Prkcz/Rap1a/Reep2/Scrib/Tgfb1
GO:1905898	positive regulation of response to endoplasmic reticulum stress	0.00985863	4	Bok/Nck2/Pik3r1/Ppp1r15a
GO:0015800	acidic amino acid transport	0.0100209	6	Adora2a/Cck/Ntsr1/Slc1a3/Slc1a6/Slc25a13
GO:0035567	non-canonical Wnt signaling pathway	0.0100209	6	Daam2/Dact1/Fzd9/Ptk7/Ror2/Wnt7b
GO:0001933	negative regulation of protein phosphorylation	0.0113885	20	Adarb1/Adora2a/Dact1/Gadd45b/Grk2/Insm1/Ldlrad4/Lif/Mecom/Mllt1/Nck2/Pax6/Pid1/Ppp1r15a/Prdm15/Prkcz/Psen2/Ptprt/Smyd3/Tgfb1
GO:0060444	branching involved in mammary gland duct morphogenesis	0.011664	4	Btrc/Etv5/Tfap2c/Tgfb1
GO:0015740	C4-dicarboxylate transport	0.0116865	3	Ntsr1/Slc1a3/Slc25a13
GO:0040034	regulation of development, heterochronic	0.0116865	3	Hes1/Pax6/Sox5
GO:1900101	regulation of endoplasmic reticulum unfolded protein response	0.0116865	3	Bok/Nck2/Pik3r1
GO:0015849	organic acid transport	0.0119244	14	Abcc1/Abcc4/Adora2a/Cacna1a/Cck/Cpt1c/Hnf1a/Ntsr1/Repin1/Slc17a5/Slc1a3/Slc1a6/Slc25a13/Slc25a17
GO:0046942	carboxylic acid transport	0.0119244	14	Abcc1/Abcc4/Adora2a/Cacna1a/Cck/Cpt1c/Hnf1a/Ntsr1/Repin1/Slc17a5/Slc1a3/Slc1a6/Slc25a13/Slc25a17
GO:0070167	regulation of biomineral tissue development	0.0125121	7	Ank/Bmp2k/Fzd9/Nbr1/Phospho1/Slc8a1/Tgfb1
GO:0031646	positive regulation of neurological system process	0.0136151	6	Cck/Grk2/Ntsr1/Prkcz/Rims1/Tenm4
GO:0021782	glial cell development	0.013619	7	Adora2a/Ndrg1/Ror2/Ski/Tcf7l2/Tenm4/Tgfb1
GO:0048713	regulation of oligodendrocyte differentiation	0.0137727	5	Daam2/Hes1/Qk/Tcf7l2/Tenm4
GO:0010001	glial cell differentiation	0.0138828	13	Adora2a/Daam2/Hes1/Lif/Ndrg1/Pax6/Qk/Ror2/Ski/Sox5/Tcf7l2/Tenm4/Tgfb1
GO:0014049	positive regulation of glutamate secretion	0.0147334	3	Adora2a/Cck/Ntsr1
GO:0072234	metanephric nephron tubule development	0.0147334	3	Hes1/Lif/Wnt7b
GO:0089718	amino acid import across plasma membrane	0.0147334	3	Ntsr1/Slc1a3/Slc1a6
GO:0014706	striated muscle tissue development	0.0147795	21	Cops2/Dll4/Ephb1/Fadd/Fhod3/Mbnl1/Megf10/Msc/Myl2/Mylpf/Ncam1/Neb/Ski/Slc8a1/Sox15/Stac3/Tcf7l2/Tenm4/Tgfb1/Wisp1/Zfpm1
GO:0042326	negative regulation of phosphorylation	0.0147795	21	Adarb1/Adora2a/Dact1/Gadd45b/Grk2/Insm1/Ldlrad4/Lif/Mecom/Midn/Mllt1/Nck2/Pax6/Pid1/Ppp1r15a/Prdm15/Prkcz/Psen2/Ptprt/Smyd3/Tgfb1
GO:0007405	neuroblast proliferation	0.0149904	6	Dct/Eml1/Fzd9/Pax6/Sox5/Tgfb1
GO:0035306	positive regulation of dephosphorylation	0.0154662	5	Camta1/Dlc1/Npnt/Ppp1r15a/Tgfb1
GO:0045687	positive regulation of glial cell differentiation	0.0154662	5	Hes1/Lif/Qk/Tenm4/Tgfb1
GO:0030500	regulation of bone mineralization	0.0164592	6	Ank/Bmp2k/Fzd9/Nbr1/Phospho1/Slc8a1
GO:0045685	regulation of glial cell differentiation	0.0173589	7	Daam2/Hes1/Lif/Qk/Tcf7l2/Tenm4/Tgfb1
GO:0048644	muscle organ morphogenesis	0.0173589	7	Adarb1/Arid5b/Dll4/Lif/Myl2/Tgfb1/Zfpm1
GO:0034620	cellular response to unfolded protein	0.0180244	6	Bok/Nck2/Pacrg/Parp16/Pik3r1/Ppp1r15a
GO:0046323	glucose import	0.0180244	6	Grk2/Hnf1a/Irs1/Pid1/Rap1a/Sh2b2
GO:0008356	asymmetric cell division	0.0181861	3	Etv5/Pax6/Sox5
GO:0046628	positive regulation of insulin receptor signaling pathway	0.0181861	3	Irs1/Prkcz/Zbtb7b
GO:0060080	inhibitory postsynaptic potential	0.0181861	3	Adora2a/Ntsr1/Rims1
GO:0061162	establishment of monopolar cell polarity	0.0181861	3	Map1b/Ptk7/Scrib
GO:0072243	metanephric nephron epithelium development	0.0181861	3	Hes1/Lif/Wnt7b
GO:1901617	organic hydroxy compound biosynthetic process	0.0187438	11	Dbh/Dct/Dkk3/Hnf1a/Insm1/Lbr/Ntsr1/Por/Pts/Sec14l2/Sphk2
GO:0035107	appendage morphogenesis	0.0194702	10	Acd/Fmn1/Hnf1a/Map3k20/Mbnl1/Mecom/Psen2/Ror2/Sik3/Ski
GO:0035108	limb morphogenesis	0.0194702	10	Acd/Fmn1/Hnf1a/Map3k20/Mbnl1/Mecom/Psen2/Ror2/Sik3/Ski
GO:0045165	cell fate commitment	0.019553	14	Dll4/Hes1/Myl2/Pax6/Prickle2/Psen2/Ror2/Sox5/Tcf7l2/Tenm4/Tfap2c/Tgfb1/Wnt7b/Zbtb7b
GO:0006835	dicarboxylic acid transport	0.0196886	6	Adora2a/Cck/Ntsr1/Slc1a3/Slc1a6/Slc25a13
GO:0006631	fatty acid metabolic process	0.0204145	15	Abhd1/Acot7/Cpt1a/Cpt1c/Cyp2s1/Ggt5/Hacd1/Hnf1a/Irs1/Pam/Por/Qk/Slc25a17/Thnsl2/Tnxb
GO:0060443	mammary gland morphogenesis	0.0213631	5	Btrc/Etv5/Scrib/Tfap2c/Tgfb1
GO:0043090	amino acid import	0.0220488	3	Ntsr1/Slc1a3/Slc1a6
GO:0046325	negative regulation of glucose import	0.0220488	3	Grk2/Pid1/Sh2b2
GO:0061339	establishment or maintenance of monopolar cell polarity	0.0220488	3	Map1b/Ptk7/Scrib
GO:0070584	mitochondrion morphogenesis	0.0220488	3	Col4a3bp/Fez1/Pid1
GO:0097320	plasma membrane tubulation	0.0220488	3	Asap1/Pacsin1/Pacsin2
GO:0060537	muscle tissue development	0.0231726	21	Cops2/Dll4/Ephb1/Fadd/Fhod3/Mbnl1/Megf10/Msc/Myl2/Mylpf/Ncam1/Neb/Ski/Slc8a1/Sox15/Stac3/Tcf7l2/Tenm4/Tgfb1/Wisp1/Zfpm1
GO:0030968	endoplasmic reticulum unfolded protein response	0.023613	5	Bok/Nck2/Parp16/Pik3r1/Ppp1r15a
GO:0031214	biomineral tissue development	0.0236866	9	Ank/Bmp2k/Fzd9/Hacd1/Nbr1/Phospho1/Slc8a1/Tcf7l2/Tgfb1
GO:0035307	positive regulation of protein dephosphorylation	0.0238036	4	Camta1/Dlc1/Ppp1r15a/Tgfb1
GO:0043551	regulation of phosphatidylinositol 3-kinase activity	0.0238036	4	Irs1/Pik3r1/Tgfb1/Vav3
GO:0046627	negative regulation of insulin receptor signaling pathway	0.0238036	4	Irs1/Pid1/Prkcz/Ptprf
GO:0014013	regulation of gliogenesis	0.0250685	9	Daam2/Etv5/Hes1/Lif/Qk/Ski/Tcf7l2/Tenm4/Tgfb1
GO:0014074	response to purine-containing compound	0.0251093	7	Adora2a/Irs1/Itpr2/Pik3r1/Rap1a/Slc8a1/Trpc3
GO:0030282	bone mineralization	0.0251093	7	Ank/Bmp2k/Fzd9/Nbr1/Phospho1/Slc8a1/Tcf7l2
GO:0060828	regulation of canonical Wnt signaling pathway	0.0258729	12	Btrc/Cdk14/Daam2/Dact1/Dkk3/Fzd9/Jade1/Prdm15/Ptk7/Ror2/Tcf7l2/Tle4
GO:0034643	establishment of mitochondrion localization, microtubule-mediated	0.0263223	3	Fez1/Map1b/Trak1
GO:0047497	mitochondrion transport along microtubule	0.0263223	3	Fez1/Map1b/Trak1
GO:0072170	metanephric tubule development	0.0263223	3	Hes1/Lif/Wnt7b
GO:1902932	positive regulation of alcohol biosynthetic process	0.0263223	3	Ntsr1/Por/Sec14l2
GO:0006984	ER-nucleus signaling pathway	0.0268908	4	Arhgef10l/Bok/Nck2/Zbtb7b
GO:0030225	macrophage differentiation	0.0268908	4	Fadd/Lif/Ror2/Tgfb1
GO:0060325	face morphogenesis	0.0268908	4	Arid5b/Ski/Tcf7l2/Tgfb1
GO:1900077	negative regulation of cellular response to insulin stimulus	0.0268908	4	Irs1/Pid1/Prkcz/Ptprf
GO:0072384	organelle transport along microtubule	0.0273852	6	Arhgap21/Fez1/Madd/Map1b/Prkcz/Trak1
GO:0001676	long-chain fatty acid metabolic process	0.0285579	5	Acot7/Cpt1a/Cyp2s1/Pam/Qk
GO:0006865	amino acid transport	0.0287953	8	Adora2a/Cacna1a/Cck/Ntsr1/Slc17a5/Slc1a3/Slc1a6/Slc25a13
GO:0045834	positive regulation of lipid metabolic process	0.0287953	8	Cpt1a/Irs1/Por/Sec14l2/Tcf7l2/Tgfb1/Vav3/Zbtb20
GO:0014015	positive regulation of gliogenesis	0.0295805	6	Etv5/Hes1/Lif/Qk/Tenm4/Tgfb1
GO:0021846	cell proliferation in forebrain	0.0302066	4	Dct/Pax6/Tacc1/Wnt7b
GO:0031018	endocrine pancreas development	0.0302066	4	Hes1/Hnf1a/Insm1/Pax6
GO:0060071	Wnt signaling pathway, planar cell polarity pathway	0.0302066	4	Dact1/Ptk7/Ror2/Wnt7b
GO:1902930	regulation of alcohol biosynthetic process	0.0302066	4	Dkk3/Ntsr1/Por/Sec14l2
GO:0055001	muscle cell development	0.0304267	11	Fhod3/Hes1/Megf10/Myl2/Neb/Ski/Slc8a1/Smyd3/Stac3/Tmod1/Wisp1
GO:0015718	monocarboxylic acid transport	0.030545	8	Abcc1/Abcc4/Cacna1a/Cpt1c/Hnf1a/Ntsr1/Repin1/Slc25a17
GO:0018393	internal peptidyl-lysine acetylation	0.030545	8	Auts2/Brd4/Hnf1a/Jade1/Lif/Por/Setd5/Tgfb1
GO:0072207	metanephric epithelium development	0.0310056	3	Hes1/Lif/Wnt7b
GO:1900078	positive regulation of cellular response to insulin stimulus	0.0310056	3	Irs1/Prkcz/Zbtb7b
GO:0046328	regulation of JNK cascade	0.0310446	10	Dact1/Ephb1/Gadd45b/Map3k20/Mecom/Nod1/Rap2a/Ror2/Tnxb/Wnt7b
GO:0046324	regulation of glucose import	0.031258	5	Grk2/Irs1/Pid1/Rap1a/Sh2b2
GO:0062013	positive regulation of small molecule metabolic process	0.0323664	8	Cpt1a/Irs1/Ntsr1/Pid1/Por/Sec14l2/Tcf7l2/Zbtb20
GO:0090175	regulation of establishment of planar polarity	0.033753	4	Dact1/Ptk7/Ror2/Wnt7b
GO:2000179	positive regulation of neural precursor cell proliferation	0.0341129	5	Dct/Dll4/Fzd9/Insm1/Pax6
GO:0016236	macroautophagy	0.034163	10	Atg16l2/Fez1/Fez2/Gabarapl2/Nbr1/Nod1/Rab3gap2/Retreg1/Sesn1/Vamp8
GO:0006475	internal protein amino acid acetylation	0.0342605	8	Auts2/Brd4/Hnf1a/Jade1/Lif/Por/Setd5/Tgfb1
GO:0010563	negative regulation of phosphorus metabolic process	0.0360886	23	Adarb1/Adora2a/Dact1/Gadd45b/Grk2/Insm1/Ldlrad4/Lif/Mecom/Midn/Mllt1/Mprip/Nck2/Pax6/Pid1/Ppp1r15a/Prdm15/Prkcz/Psen2/Ptprt/Sh2d4a/Smyd3/Tgfb1
GO:0045936	negative regulation of phosphate metabolic process	0.0360886	23	Adarb1/Adora2a/Dact1/Gadd45b/Grk2/Insm1/Ldlrad4/Lif/Mecom/Midn/Mllt1/Mprip/Nck2/Pax6/Pid1/Ppp1r15a/Prdm15/Prkcz/Psen2/Ptprt/Sh2d4a/Smyd3/Tgfb1
GO:0001958	endochondral ossification	0.036095	3	Col13a1/Phospho1/Sik3
GO:0036075	replacement ossification	0.036095	3	Col13a1/Phospho1/Sik3
GO:0043552	positive regulation of phosphatidylinositol 3-kinase activity	0.036095	3	Irs1/Tgfb1/Vav3
GO:0072273	metanephric nephron morphogenesis	0.036095	3	Fmn1/Hes1/Lif
GO:2000785	regulation of autophagosome assembly	0.036095	3	Fez1/Fez2/Rab3gap2
GO:0009410	response to xenobiotic stimulus	0.0363755	9	Adora2a/Cyp2s1/Dbh/Fadd/Irs1/Ncam1/Slc8a1/Smyd3/Tgfb1
GO:0043113	receptor clustering	0.0371244	5	Cacna1a/Etv5/Fzd9/Scrib/Tgfb1
GO:0046165	alcohol biosynthetic process	0.0371856	7	Dbh/Dkk3/Ntsr1/Por/Pts/Sec14l2/Sphk2
GO:0015807	L-amino acid transport	0.0375315	4	Ntsr1/Slc1a3/Slc1a6/Slc25a13
GO:0021545	cranial nerve development	0.0375315	4	Adarb1/Ephb1/Hes1/Slc1a3
GO:0050850	positive regulation of calcium-mediated signaling	0.0375315	4	Camta1/Cdh13/Lmcd1/Ncam1
GO:0048736	appendage development	0.039241	10	Acd/Fmn1/Hnf1a/Map3k20/Mbnl1/Mecom/Psen2/Ror2/Sik3/Ski
GO:0060173	limb development	0.039241	10	Acd/Fmn1/Hnf1a/Map3k20/Mbnl1/Mecom/Psen2/Ror2/Sik3/Ski
GO:0035967	cellular response to topologically incorrect protein	0.0395025	6	Bok/Nck2/Pacrg/Parp16/Pik3r1/Ppp1r15a
GO:0045445	myoblast differentiation	0.0395025	6	Mbnl1/Pik3r1/Sox15/Tcf7l2/Tgfb1/Zfhx3
GO:0008645	hexose transmembrane transport	0.0395134	7	Grk2/Hnf1a/Irs1/Pid1/Rap1a/Sh2b2/Slc2a9
GO:1904659	glucose transmembrane transport	0.0395134	7	Grk2/Hnf1a/Irs1/Pid1/Rap1a/Sh2b2/Slc2a9
GO:1905330	regulation of morphogenesis of an epithelium	0.0395134	7	Dact1/Etv5/Lif/Ptk7/Ror2/Tgfb1/Wnt7b
GO:0043388	positive regulation of DNA binding	0.040294	5	Acd/Brd4/Hes1/Ski/Tgfb1
GO:0060323	head morphogenesis	0.041543	4	Arid5b/Ski/Tcf7l2/Tgfb1
GO:0001919	regulation of receptor recycling	0.041585	3	Psen2/Scrib/Tbc1d16
GO:0010829	negative regulation of glucose transmembrane transport	0.041585	3	Grk2/Pid1/Sh2b2
GO:0014048	regulation of glutamate secretion	0.041585	3	Adora2a/Cck/Ntsr1
GO:0051654	establishment of mitochondrion localization	0.041585	3	Fez1/Map1b/Trak1
GO:0055003	cardiac myofibril assembly	0.041585	3	Fhod3/Myl2/Neb
GO:0015749	monosaccharide transmembrane transport	0.0419346	7	Grk2/Hnf1a/Irs1/Pid1/Rap1a/Sh2b2/Slc2a9
GO:1904375	regulation of protein localization to cell periphery	0.0425853	8	Pid1/Pik3r1/Prkcz/Rap1a/Stac2/Stac3/Tgfb1/Vamp8
GO:0007519	skeletal muscle tissue development	0.0429016	10	Cops2/Ephb1/Mbnl1/Megf10/Msc/Mylpf/Ski/Stac3/Tcf7l2/Tgfb1
GO:0030036	actin cytoskeleton organization	0.0436661	27	Actn1/Arhgap18/Arhgef10l/Arhgef17/Arpc5/Auts2/Baiap2l1/Coro2b/Daam2/Dlc1/Fhod3/Fmn1/Limch1/Myl2/Nck2/Neb/Pacsin1/Pacsin2/Pam/Pik3r1/Plekhg2/Ptk7/Rap2a/Sh2b2/Specc1/Tgfb1/Tmod1
GO:0034219	carbohydrate transmembrane transport	0.04445	7	Grk2/Hnf1a/Irs1/Pid1/Rap1a/Sh2b2/Slc2a9
GO:1905114	cell surface receptor signaling pathway involved in cell-cell signaling	0.0454405	22	Adora2a/Arl6/Btrc/Cdk14/Daam2/Dact1/Dkk3/Fzd9/Grk2/Hnf1a/Jade1/Mpp2/Ntsr1/Prdm15/Prkcz/Ptk7/Rims1/Ror2/Tcf7l2/Tle4/Wisp1/Wnt7b
GO:0050918	positive chemotaxis	0.0457876	4	Ccr4/Cdh13/Scrib/Wnt7b
GO:0007254	JNK cascade	0.0467885	10	Dact1/Ephb1/Gadd45b/Map3k20/Mecom/Nod1/Rap2a/Ror2/Tnxb/Wnt7b
GO:0018394	peptidyl-lysine acetylation	0.0472096	8	Auts2/Brd4/Hnf1a/Jade1/Lif/Por/Setd5/Tgfb1
GO:0044088	regulation of vacuole organization	0.0474686	3	Fez1/Fez2/Rab3gap2
GO:0060993	kidney morphogenesis	0.0481818	6	Fmn1/Hes1/Lif/Npnt/Tgfb1/Wnt7b
GO:0030326	embryonic limb morphogenesis	0.0496399	8	Acd/Hnf1a/Map3k20/Mbnl1/Mecom/Psen2/Ror2/Ski
GO:0035113	embryonic appendage morphogenesis	0.0496399	8	Acd/Hnf1a/Map3k20/Mbnl1/Mecom/Psen2/Ror2/Ski

## Sheet: HippocampusPSHETvsCtrlHETHyper
Dataset 2: Hyper DhMR-associated gene ontologies
Hippocampus
PS HET vs Control HET
GO ID	Description	P-value	# of genes	Gene Symbol
GO:0048812	neuron projection morphogenesis	1.56464e-11	84	Ablim1/Adgrb3/Alcam/Als2/Ank3/Apbb2/Apc/Arhgap44/Atoh1/Atxn2/Auts2/Braf/Cdh2/Cdk5r1/Clasp2/Cntn2/Ctnna2/Cux2/Dab1/Dact1/Disc1/Dnm3/Dscam/Dst/Dtnbp1/Eef2k/Efna5/Enah/Epha5/Ephb1/Flrt3/Foxp1/Fxn/Gap43/Gas7/Gdnf/Gli2/Gsk3b/Hecw2/Hnrnpk/Ispd/Kalrn/Kif13b/Kirrel3/Klf7/Lrrk2/Map2/Mink1/Ncam1/Nedd4/Nlgn1/Nptn/Nrcam/Pax6/Prkn/Pten/Ptpn11/Ptprd/Ptprm/Rap2a/Rapgef2/Raph1/Reln/Rere/Robo1/Rock1/Rtn4r/Rufy3/S…
GO:0120039	plasma membrane bounded cell projection morphogenesis	6.59553e-11	84	Ablim1/Adgrb3/Alcam/Als2/Ank3/Apbb2/Apc/Arhgap44/Atoh1/Atxn2/Auts2/Braf/Cdh2/Cdk5r1/Clasp2/Cntn2/Ctnna2/Cux2/Dab1/Dact1/Disc1/Dnm3/Dscam/Dst/Dtnbp1/Eef2k/Efna5/Enah/Epha5/Ephb1/Flrt3/Foxp1/Fxn/Gap43/Gas7/Gdnf/Gli2/Gsk3b/Hecw2/Hnrnpk/Ispd/Kalrn/Kif13b/Kirrel3/Klf7/Lrrk2/Map2/Mink1/Ncam1/Nedd4/Nlgn1/Nptn/Nrcam/Pax6/Prkn/Pten/Ptpn11/Ptprd/Ptprm/Rap2a/Rapgef2/Raph1/Reln/Rere/Robo1/Rock1/Rtn4r/Rufy3/S…
GO:0048858	cell projection morphogenesis	8.17595e-11	84	Ablim1/Adgrb3/Alcam/Als2/Ank3/Apbb2/Apc/Arhgap44/Atoh1/Atxn2/Auts2/Braf/Cdh2/Cdk5r1/Clasp2/Cntn2/Ctnna2/Cux2/Dab1/Dact1/Disc1/Dnm3/Dscam/Dst/Dtnbp1/Eef2k/Efna5/Enah/Epha5/Ephb1/Flrt3/Foxp1/Fxn/Gap43/Gas7/Gdnf/Gli2/Gsk3b/Hecw2/Hnrnpk/Ispd/Kalrn/Kif13b/Kirrel3/Klf7/Lrrk2/Map2/Mink1/Ncam1/Nedd4/Nlgn1/Nptn/Nrcam/Pax6/Prkn/Pten/Ptpn11/Ptprd/Ptprm/Rap2a/Rapgef2/Raph1/Reln/Rere/Robo1/Rock1/Rtn4r/Rufy3/S…
GO:0048667	cell morphogenesis involved in neuron differentiation	1.77194e-10	77	Ablim1/Adgrb3/Alcam/Als2/Ank3/Apbb2/Apc/Arhgap44/Atoh1/Auts2/Braf/Cdh2/Cdk5r1/Clasp2/Cntn2/Ctnna2/Cux2/Dab1/Dact1/Disc1/Dnm3/Dscam/Dst/Dtnbp1/Eef2k/Efna5/Enah/Epha5/Ephb1/Flrt3/Foxp1/Fxn/Gap43/Gdnf/Gli2/Gsk3b/Hecw2/Ispd/Kalrn/Kif13b/Klf7/Lhfpl5/Lrrk2/Map2/Mink1/Ncam1/Nedd4/Nlgn1/Nptn/Nrcam/Pax6/Pten/Ptpn11/Ptprd/Ptprm/Rap2a/Rapgef2/Raph1/Reln/Rere/Robo1/Rtn4r/Rufy3/Sema4f/Sema5a/Sept7/Shank2/Slc1…
GO:0050808	synapse organization	4.04441e-09	58	Adgrb3/Adgrl3/Als2/Ank3/Arhgap44/Cdh2/Cdh8/Cdk5r1/Clstn2/Cntn2/Cntnap4/Col4a1/Ctnna2/Cux2/Dact1/Disc1/Dnm3/Dtnbp1/Eef2k/Efna5/Epha3/Epha5/Ephb1/Etv5/Filip1/Flrt3/Fzd1/Gap43/Gdnf/Gsk3b/Hnrnpk/Homer1/Kalrn/Kirrel3/Lhfpl4/Lmx1b/Lrrc4/Lrrk2/Mapk14/Nedd4/Nfia/Nlgn1/Nptn/Nptxr/Nrcam/Nrxn1/Pclo/Pten/Ptprd/Reln/Sdk1/Sept7/Sez6l/Shank2/Tmem108/Tpbg/Utrn/Wnt7a
GO:0048813	dendrite morphogenesis	3.86008e-08	31	Adgrb3/Arhgap44/Cdk5r1/Ctnna2/Cux2/Dact1/Dnm3/Dscam/Dtnbp1/Eef2k/Epha5/Ephb1/Gsk3b/Hecw2/Kalrn/Klf7/Lrrk2/Mink1/Nedd4/Nlgn1/Pten/Ptprd/Rap2a/Rapgef2/Reln/Rere/Robo1/Sept7/Shank2/Tbc1d24/Wnt7a
GO:0010975	regulation of neuron projection development	5.28368e-08	69	Adgrb3/Ahi1/Arhgap44/Asap1/Atf1/Braf/Cdh2/Cdk5r1/Clasp2/Cntn2/Cpeb1/Creb3l2/Cux2/Dab1/Dguok/Disc1/Dnm3/Dpysl3/Dscam/Dtnbp1/Eef2k/Efna5/Epha3/Fbxo38/Fbxo7/Fxn/Fzd1/Gsk3b/Hecw2/Hnrnpk/Hspa5/Inpp5f/Kalrn/Kif13b/Lrp6/Lrrk2/Map2/Nck1/Nedd4/Negr1/Nlgn1/Nr2f1/Nrcam/Ntm/Paqr3/Pax6/Plk2/Prkd1/Prkn/Pten/Ptprd/Rap2a/Rapgef2/Reln/Retreg3/Robo1/Rtn4r/Rufy3/Sdk1/Sema4f/Sema5a/Shank2/Snap25/Ssh2/Stmn2/Syt1/Tbc1…
GO:0007409	axonogenesis	7.35724e-08	57	Ablim1/Alcam/Als2/Ank3/Apbb2/Apc/Atoh1/Auts2/Braf/Cdh2/Cdk5r1/Clasp2/Cntn2/Ctnna2/Dab1/Disc1/Dscam/Dst/Efna5/Enah/Epha5/Ephb1/Flrt3/Foxp1/Fxn/Gap43/Gdnf/Gli2/Gsk3b/Ispd/Kalrn/Kif13b/Klf7/Map2/Ncam1/Nptn/Nrcam/Pax6/Pten/Ptpn11/Ptprm/Raph1/Reln/Robo1/Rtn4r/Rufy3/Sema4f/Sema5a/Sept7/Ssh2/Tenm2/Tgfb2/Unc5a/Ust/Vangl2/Vcl/Wnt7a
GO:0050807	regulation of synapse organization	9.32218e-08	39	Adgrb3/Adgrl3/Arhgap44/Cdh2/Cdh8/Cdk5r1/Clstn2/Cntnap4/Ctnna2/Cux2/Disc1/Dnm3/Dtnbp1/Eef2k/Efna5/Ephb1/Etv5/Flrt3/Fzd1/Gap43/Gsk3b/Hnrnpk/Homer1/Kalrn/Lhfpl4/Lrrc4/Lrrk2/Mapk14/Nedd4/Nlgn1/Nptxr/Nrcam/Nrxn1/Pten/Ptprd/Reln/Shank2/Tpbg/Wnt7a
GO:0050803	regulation of synapse structure or activity	1.66612e-07	39	Adgrb3/Adgrl3/Arhgap44/Cdh2/Cdh8/Cdk5r1/Clstn2/Cntnap4/Ctnna2/Cux2/Disc1/Dnm3/Dtnbp1/Eef2k/Efna5/Ephb1/Etv5/Flrt3/Fzd1/Gap43/Gsk3b/Hnrnpk/Homer1/Kalrn/Lhfpl4/Lrrc4/Lrrk2/Mapk14/Nedd4/Nlgn1/Nptxr/Nrcam/Nrxn1/Pten/Ptprd/Reln/Shank2/Tpbg/Wnt7a
GO:0061564	axon development	1.92847e-07	59	Ablim1/Alcam/Als2/Ank3/Apbb2/Apc/Atoh1/Auts2/Braf/Cdh2/Cdk5r1/Clasp2/Cntn2/Ctnna2/Dab1/Disc1/Dscam/Dst/Efna5/Enah/Epha3/Epha5/Ephb1/Flrt3/Foxp1/Fxn/Gap43/Gdnf/Gli2/Gsk3b/Inpp5f/Ispd/Kalrn/Kif13b/Klf7/Map2/Ncam1/Nptn/Nrcam/Pax6/Pten/Ptpn11/Ptprm/Raph1/Reln/Robo1/Rtn4r/Rufy3/Sema4f/Sema5a/Sept7/Ssh2/Tenm2/Tgfb2/Unc5a/Ust/Vangl2/Vcl/Wnt7a
GO:0060996	dendritic spine development	5.15244e-07	23	Arhgap44/Asap1/Cdk5r1/Cux2/Disc1/Dnm3/Dtnbp1/Eef2k/Epha5/Ephb1/Hnrnpk/Kalrn/Lrrk2/Nlgn1/Plk2/Pten/Reln/Sdk1/Sept7/Shank2/Spire1/Srgap2/Wnt7a
GO:0016358	dendrite development	5.88962e-07	40	Adgrb3/Arhgap44/Asap1/Cdk5r1/Ctnna2/Cux2/Dab1/Dact1/Disc1/Dnm3/Dscam/Dtnbp1/Eef2k/Epha5/Ephb1/Gsk3b/Hecw2/Hnrnpk/Kalrn/Klf7/Lrrk2/Map2/Mink1/Nedd4/Nlgn1/Plk2/Pten/Ptprd/Rap2a/Rapgef2/Reln/Rere/Robo1/Sdk1/Sept7/Shank2/Spire1/Srgap2/Tbc1d24/Wnt7a
GO:0060997	dendritic spine morphogenesis	1.13012e-06	16	Arhgap44/Cdk5r1/Cux2/Dnm3/Dtnbp1/Eef2k/Epha5/Ephb1/Kalrn/Lrrk2/Nlgn1/Pten/Reln/Sept7/Shank2/Wnt7a
GO:0098742	cell-cell adhesion via plasma-membrane adhesion molecules	1.90561e-06	28	Adgrl3/Alcam/Cdh13/Cdh2/Cdh20/Cdh26/Cdh8/Clstn2/Dab1/Dscam/Efna5/Epha3/Flrt3/Kirrel3/Lrrc4/Mapk14/Mbp/Nlgn1/Nptn/Nrcam/Nrxn1/Ptprd/Ptprm/Ptprt/Robo1/Sdk1/Tenm2/Tgfb2
GO:0099173	postsynapse organization	4.58271e-06	29	Arhgap44/Cdh2/Cdk5r1/Cux2/Dnm3/Dtnbp1/Eef2k/Epha5/Ephb1/Etv5/Gap43/Gdnf/Hnrnpk/Homer1/Kalrn/Lhfpl4/Lrrc4/Lrrk2/Nlgn1/Nptxr/Nrcam/Nrxn1/Pten/Ptprd/Reln/Sept7/Shank2/Tmem108/Wnt7a
GO:0007411	axon guidance	4.76623e-06	32	Ablim1/Alcam/Ank3/Apbb2/Atoh1/Cdk5r1/Cntn2/Dscam/Efna5/Enah/Epha5/Ephb1/Flrt3/Foxp1/Gap43/Gdnf/Gli2/Ispd/Klf7/Ncam1/Nptn/Nrcam/Pax6/Ptprm/Reln/Robo1/Sema4f/Sema5a/Tenm2/Tgfb2/Unc5a/Vangl2
GO:0048814	regulation of dendrite morphogenesis	4.82717e-06	20	Adgrb3/Arhgap44/Cdk5r1/Cux2/Dnm3/Dtnbp1/Eef2k/Gsk3b/Hecw2/Kalrn/Lrrk2/Nedd4/Nlgn1/Pten/Ptprd/Rap2a/Rapgef2/Reln/Robo1/Tbc1d24
GO:0097485	neuron projection guidance	5.44519e-06	32	Ablim1/Alcam/Ank3/Apbb2/Atoh1/Cdk5r1/Cntn2/Dscam/Efna5/Enah/Epha5/Ephb1/Flrt3/Foxp1/Gap43/Gdnf/Gli2/Ispd/Klf7/Ncam1/Nptn/Nrcam/Pax6/Ptprm/Reln/Robo1/Sema4f/Sema5a/Tenm2/Tgfb2/Unc5a/Vangl2
GO:0098815	modulation of excitatory postsynaptic potential	6.41592e-06	13	Cux2/Grin2a/Gsk3b/Lrrk2/Nlgn1/Nrxn1/Prkn/Pten/Reln/Shank2/Tbc1d24/Tmem108/Wnt7a
GO:0007416	synapse assembly	7.36049e-06	26	Adgrb3/Adgrl3/Cdh2/Clstn2/Cux2/Dnm3/Eef2k/Efna5/Ephb1/Flrt3/Fzd1/Gap43/Kirrel3/Lhfpl4/Nlgn1/Nptn/Nptxr/Nrxn1/Pclo/Pten/Ptprd/Reln/Sdk1/Shank2/Tpbg/Wnt7a
GO:0097120	receptor localization to synapse	1.35814e-05	15	Adam22/Anks1b/Arhgap44/Dlg2/Grip2/Gsk3b/Kalrn/Mapk10/Nlgn1/Nptn/Nptxr/Nrxn1/Reln/Snap25/Synj2bp
GO:0106027	neuron projection organization	1.72378e-05	18	Arhgap44/Cdk5r1/Cux2/Dnm3/Dtnbp1/Eef2k/Epha5/Ephb1/Gsk3b/Homer1/Kalrn/Lrrk2/Nlgn1/Pten/Reln/Sept7/Shank2/Wnt7a
GO:0060998	regulation of dendritic spine development	1.92851e-05	17	Arhgap44/Asap1/Cdk5r1/Cux2/Disc1/Dnm3/Dtnbp1/Eef2k/Hnrnpk/Kalrn/Lrrk2/Nlgn1/Plk2/Pten/Reln/Sdk1/Shank2
GO:0097061	dendritic spine organization	1.92851e-05	17	Arhgap44/Cdk5r1/Cux2/Dnm3/Dtnbp1/Eef2k/Epha5/Ephb1/Homer1/Kalrn/Lrrk2/Nlgn1/Pten/Reln/Sept7/Shank2/Wnt7a
GO:2000463	positive regulation of excitatory postsynaptic potential	2.35264e-05	10	Cux2/Grin2a/Gsk3b/Nlgn1/Nrxn1/Pten/Reln/Shank2/Tbc1d24/Wnt7a
GO:0060412	ventricular septum morphogenesis	2.9277e-05	13	Cited2/Fzd1/Hey2/Lrp6/Nfatc1/Prox1/Rbm15/Robo1/Sox4/Tgfb2/Tgfbr3/Vangl2/Zfpm2
GO:0051668	localization within membrane	3.61513e-05	26	Adam22/Anks1b/Ap2b1/Arhgap44/Cdh13/Cdh2/Clip1/Dlg2/Dnm3/Etv5/Grik2/Grip2/Gsk3b/Insig1/Kalrn/Lhfpl4/Mapk10/Nedd4/Nlgn1/Nptn/Nptxr/Nrxn1/Rab1a/Reln/Snap25/Synj2bp
GO:0010977	negative regulation of neuron projection development	4.28586e-05	24	Asap1/Cdk5r1/Dab1/Dguok/Dnm3/Dpysl3/Dtnbp1/Epha3/Gsk3b/Inpp5f/Lrrk2/Map2/Nlgn1/Nr2f1/Ntm/Paqr3/Plk2/Pten/Rapgef2/Rtn4r/Rufy3/Sema4f/Sema5a/Stmn2
GO:0099175	regulation of postsynapse organization	4.5571e-05	20	Arhgap44/Cdh2/Cdk5r1/Cux2/Dnm3/Dtnbp1/Eef2k/Gap43/Hnrnpk/Homer1/Kalrn/Lrrk2/Nlgn1/Nptxr/Nrcam/Nrxn1/Pten/Ptprd/Reln/Wnt7a
GO:0051966	regulation of synaptic transmission, glutamatergic	4.83867e-05	14	Cdh2/Disc1/Dtnbp1/Grik2/Homer1/Kalrn/Lrrk2/Nlgn1/Nrxn1/Prkaca/Prkn/Reln/Shank2/Syt1
GO:0060038	cardiac muscle cell proliferation	4.99644e-05	13	Apc/Arid2/Cited2/Foxp1/Hey2/Jarid2/Mapk14/Meis1/Ncam1/Pten/Tgfb2/Tgfbr3/Zfpm2
GO:0035418	protein localization to synapse	5.01766e-05	16	Adam22/Arhgap44/Dlg2/Grin2a/Grip2/Gsk3b/Homer1/Kalrn/Klc1/Mapk10/Nlgn1/Nptxr/Nrxn1/Pclo/Reln/Snap25
GO:0140029	exocytic process	5.01766e-05	16	Bloc1s6/Erc1/Erc2/Exoc4/Exoc6/Exoc6b/Ncam1/Nlgn1/Nrxn1/Pclo/Rab3c/Snap25/Syt1/Syt7/Sytl2/Vps45
GO:0050773	regulation of dendrite development	5.36682e-05	26	Adgrb3/Arhgap44/Asap1/Cdk5r1/Cux2/Disc1/Dnm3/Dtnbp1/Eef2k/Gsk3b/Hecw2/Hnrnpk/Kalrn/Lrrk2/Nedd4/Nlgn1/Plk2/Pten/Ptprd/Rap2a/Rapgef2/Reln/Robo1/Sdk1/Shank2/Tbc1d24
GO:0099084	postsynaptic specialization organization	6.0018e-05	11	Cdh2/Gap43/Lrrc4/Nlgn1/Nptxr/Nrxn1/Pten/Ptprd/Reln/Shank2/Tmem108
GO:0010769	regulation of cell morphogenesis involved in differentiation	6.44902e-05	39	Adgrb3/Arhgap44/Braf/Cdh2/Cdk5r1/Clasp2/Cntn2/Cux2/Dab1/Disc1/Dnm3/Dscam/Dtnbp1/Eef2k/Efna5/Fxn/Gsk3b/Hecw2/Kalrn/Kif13b/Lrrk2/Map2/Nedd4/Nlgn1/Pten/Ptprd/Rap2a/Rapgef2/Rcc2/Reln/Robo1/Rtn4r/Rufy3/Sema4f/Sema5a/Ssh2/Tbc1d24/Ust/Wnt7a
GO:0060043	regulation of cardiac muscle cell proliferation	8.10074e-05	11	Apc/Cited2/Foxp1/Hey2/Jarid2/Mapk14/Meis1/Ncam1/Pten/Tgfbr3/Zfpm2
GO:0061001	regulation of dendritic spine morphogenesis	8.10074e-05	11	Arhgap44/Cdk5r1/Cux2/Dnm3/Dtnbp1/Eef2k/Kalrn/Lrrk2/Nlgn1/Pten/Reln
GO:0031345	negative regulation of cell projection organization	0.000100285	26	Asap1/Cdk5r1/Dab1/Dguok/Dnm3/Dpysl3/Dtnbp1/Epha3/Gsk3b/Inpp5f/Lrrk2/Map2/Map4/Nlgn1/Nr2f1/Nrxn1/Ntm/Paqr3/Plk2/Pten/Rapgef2/Rtn4r/Rufy3/Sema4f/Sema5a/Stmn2
GO:0061000	negative regulation of dendritic spine development	0.000105151	6	Asap1/Dnm3/Dtnbp1/Nlgn1/Plk2/Pten
GO:0021587	cerebellum morphogenesis	0.000142219	11	Atxn2/Dab1/Gli2/Hspa5/Lmx1b/Lrp6/Nrxn1/Prox1/Ptpn11/Rora/Wnt7a
GO:0014855	striated muscle cell proliferation	0.000146738	14	Apc/Arid2/Cited2/Ephb1/Foxp1/Hey2/Jarid2/Mapk14/Meis1/Ncam1/Pten/Tgfb2/Tgfbr3/Zfpm2
GO:0045666	positive regulation of neuron differentiation	0.000154955	47	Ahi1/Atf1/Atoh1/Braf/Cpeb1/Creb3l2/Cux2/Dab1/Disc1/Dlx1/Dpysl3/Dscam/Eef2k/Efna5/Epha3/Etv5/Fbxo38/Fxn/Fzd1/Gli2/Gsk3b/Hnrnpk/Hspa5/Kalrn/Lrp6/Nck1/Ncoa1/Negr1/Nlgn1/Pax6/Prkd1/Prkn/Prox1/Pten/Ptprd/Rapgef2/Reln/Retreg3/Robo1/Rufy3/Sema5a/Shank2/Stmn2/Syt1/Tbc1d24/Tcf4/Zeb1
GO:0035249	synaptic transmission, glutamatergic	0.000158553	16	Als2/Cdh2/Cdh8/Disc1/Dtnbp1/Grik2/Homer1/Kalrn/Lrrk2/Nlgn1/Nrxn1/Prkaca/Prkn/Reln/Shank2/Syt1
GO:0021543	pallium development	0.000167822	21	Atoh1/Cdh2/Cdk5r1/Dab1/Disc1/Dlx1/Efhc1/Epha5/Gsk3b/Hnrnpk/Kirrel3/Lrp6/Nr2f1/Pax6/Plcb1/Prox1/Pten/Reln/Robo1/Srgap2/Tmem108
GO:0003281	ventricular septum development	0.000189147	16	Ap2b1/Cited2/Fzd1/Hey2/Lrp6/Matr3/Nfatc1/Prox1/Rbm15/Robo1/Sox4/Stra6/Tgfb2/Tgfbr3/Vangl2/Zfpm2
GO:0050774	negative regulation of dendrite morphogenesis	0.0001955	6	Dnm3/Dtnbp1/Gsk3b/Nlgn1/Pten/Rapgef2
GO:0021575	hindbrain morphogenesis	0.000238902	11	Atxn2/Dab1/Gli2/Hspa5/Lmx1b/Lrp6/Nrxn1/Prox1/Ptpn11/Rora/Wnt7a
GO:0060078	regulation of postsynaptic membrane potential	0.000266007	16	Cux2/Gria1/Grik2/Grin2a/Gsk3b/Kcnd2/Lrrk2/Nlgn1/Nrxn1/Prkn/Pten/Reln/Shank2/Tbc1d24/Tmem108/Wnt7a
GO:0072657	protein localization to membrane	0.000274922	50	Adam22/Ank3/Arhgap44/Arl5b/Bag4/Braf/Cdh2/Cdk5r1/Clasp2/Clip1/Cpe/Dlg2/Epha3/Etv5/Exoc4/Fam126a/Grik2/Grin2a/Grip2/Gsk3b/Kalrn/Lhfpl4/Lrp6/Lrrc4/Lypd1/Mapk10/Mgea5/Mtch2/Nlgn1/Nptxr/Nrxn1/Pid1/Ppfia1/Prkn/Rab3c/Rap2a/Rapgef2/Reln/Rock1/Sec63/Snap25/Srp19/Srp72/Synj2bp/Sytl2/Tram2/Tspan5/Ttc7b/Zdhhc11/Zdhhc14
GO:0051965	positive regulation of synapse assembly	0.00030828	13	Adgrb3/Adgrl3/Clstn2/Cux2/Eef2k/Efna5/Ephb1/Flrt3/Nlgn1/Nrxn1/Ptprd/Tpbg/Wnt7a
GO:0051648	vesicle localization	0.000323556	30	Adora2b/Ahi1/Apba2/Arfgap2/Bloc1s6/Braf/Cdh2/Clasp2/Dnm3/Dtnbp1/Dync1i1/Eipr1/Erc1/Erc2/Gbf1/Gsk3b/Lrrk2/Madd/Map2/Nlgn1/Nrxn1/Pclo/Prkcb/Pten/Rab1a/Sec16b/Snap25/Syt1/Syt7/Wnt7a
GO:0051962	positive regulation of nervous system development	0.000339661	59	Adgrb3/Adgrl3/Ahi1/Atf1/Atoh1/Braf/Clstn2/Cpeb1/Creb3l2/Cux2/Dab1/Disc1/Dlx1/Dpysl3/Dscam/Eef2k/Efna5/Epha3/Ephb1/Etv5/Fbxo38/Flrt3/Fxn/Fzd1/Gli2/Gsk3b/Hnrnpk/Hspa5/Kalrn/Lrp6/Mir219a-2/Nck1/Ncoa1/Negr1/Nlgn1/Nrxn1/Pax6/Prkd1/Prkn/Prox1/Pten/Ptprd/Rapgef2/Reln/Retreg3/Robo1/Rufy3/Sema5a/Shank2/Spen/Stmn2/Syt1/Tbc1d24/Tcf4/Tpbg/Wnt7a/Xrcc4/Zeb1/Zfp609
GO:1904861	excitatory synapse assembly	0.000353866	8	Nlgn1/Nptn/Nrxn1/Pten/Ptprd/Reln/Shank2/Wnt7a
GO:0060079	excitatory postsynaptic potential	0.000384715	14	Cux2/Grik2/Grin2a/Gsk3b/Lrrk2/Nlgn1/Nrxn1/Prkn/Pten/Reln/Shank2/Tbc1d24/Tmem108/Wnt7a
GO:0070972	protein localization to endoplasmic reticulum	0.000385991	11	Gbf1/Hspa5/Insig1/Ryr2/Sec16b/Sec63/Spcs2/Srp19/Srp72/Tapt1/Tram2
GO:0099068	postsynapse assembly	0.000401966	9	Cdh2/Gap43/Nlgn1/Nptxr/Nrxn1/Pten/Ptprd/Reln/Shank2
GO:0031346	positive regulation of cell projection organization	0.00043018	45	Ahi1/Apc/Atf1/Auts2/Braf/Cpeb1/Creb3l2/Cux2/Disc1/Dnm3/Dpysl3/Dscam/Eef2k/Efna5/Epha3/Eps8/Fbxo38/Fxn/Fzd1/Gsk3b/Hdac4/Hnrnpk/Hspa5/Kalrn/Lrp6/Nck1/Nckap1/Negr1/Nlgn1/Prkd1/Prkn/Ptprd/Rapgef2/Reln/Retreg3/Robo1/Rufy3/Sema5a/Sept7/Shank2/Stmn2/Syt1/Tapt1/Tbc1d24/Ttbk2
GO:0006470	protein dephosphorylation	0.000433531	28	Ankle2/Camta1/Dusp23/Dusp6/Lrrc30/Mgat5/Mprip/Nck1/Ppp1r12a/Ppp2ca/Ppp2r2a/Ppp2r2b/Ppp2r5e/Ppp6r3/Pten/Ptpn11/Ptpn4/Ptprd/Ptprj/Ptprk/Ptprm/Ptprn2/Ptprr/Ptprt/Rock1/Ssh2/Swap70/Vcan
GO:2000171	negative regulation of dendrite development	0.000492423	8	Asap1/Dnm3/Dtnbp1/Gsk3b/Nlgn1/Plk2/Pten/Rapgef2
GO:0097106	postsynaptic density organization	0.000532313	9	Cdh2/Lrrc4/Nlgn1/Nrxn1/Pten/Ptprd/Reln/Shank2/Tmem108
GO:0051963	regulation of synapse assembly	0.000543742	17	Adgrb3/Adgrl3/Clstn2/Cux2/Eef2k/Efna5/Ephb1/Flrt3/Fzd1/Gap43/Lhfpl4/Nlgn1/Nptxr/Nrxn1/Ptprd/Tpbg/Wnt7a
GO:0045665	negative regulation of neuron differentiation	0.000596911	29	Asap1/Cdk5r1/Cntn2/Dab1/Dguok/Dlx1/Dnm3/Dpysl3/Dtnbp1/Epha3/Gsk3b/Inpp5f/Lrrk2/Map2/Meis1/Mib1/Nlgn1/Nr2f1/Ntm/Paqr3/Pax6/Plk2/Pten/Rapgef2/Rtn4r/Rufy3/Sema4f/Sema5a/Stmn2
GO:0010771	negative regulation of cell morphogenesis involved in differentiation	0.000621163	15	Cdk5r1/Dab1/Dnm3/Dtnbp1/Efna5/Gsk3b/Map2/Nlgn1/Pten/Rapgef2/Rcc2/Rtn4r/Rufy3/Sema4f/Sema5a
GO:0032984	protein-containing complex disassembly	0.000646673	23	Add1/Apc/Arid2/Capza2/Cebpg/Clasp2/Dnajc6/Eps8/Gspt1/Klc1/Map2/Mgea5/Nckap5/Pym1/Sema5a/Snx14/Sptan1/Stmn2/Stmn4/Swap70/Ttbk2/Ubqln1/Vill
GO:0060420	regulation of heart growth	0.00065704	13	Apc/Cited2/Dusp6/Foxp1/Hey2/Jarid2/Mapk14/Meis1/Ncam1/Prox1/Pten/Tgfbr3/Zfpm2
GO:0098698	postsynaptic specialization assembly	0.000671857	8	Gap43/Nlgn1/Nptxr/Nrxn1/Pten/Ptprd/Reln/Shank2
GO:0006904	vesicle docking involved in exocytosis	0.000695366	9	Bloc1s6/Exoc4/Exoc6/Exoc6b/Ncam1/Nrxn1/Rab3c/Sytl2/Vps45
GO:0021549	cerebellum development	0.000725484	15	Atxn2/Cdk5r1/Dab1/Gli2/Hspa5/Lmx1b/Lrp6/Nrxn1/Prox1/Ptpn11/Rere/Rora/Sez6l/Ttbk2/Wnt7a
GO:0021987	cerebral cortex development	0.000725484	15	Atoh1/Cdh2/Cdk5r1/Dab1/Disc1/Efhc1/Gsk3b/Hnrnpk/Lrp6/Nr2f1/Pax6/Plcb1/Reln/Robo1/Srgap2
GO:0021695	cerebellar cortex development	0.000743805	11	Atxn2/Gli2/Hspa5/Nrxn1/Prox1/Ptpn11/Rere/Rora/Sez6l/Ttbk2/Wnt7a
GO:0007156	homophilic cell adhesion via plasma membrane adhesion molecules	0.000762546	14	Cdh13/Cdh2/Cdh20/Cdh26/Cdh8/Clstn2/Dscam/Kirrel3/Nptn/Nrcam/Ptprm/Ptprt/Robo1/Sdk1
GO:0022604	regulation of cell morphogenesis	0.000878197	49	Adgrb3/Arap3/Arhgap15/Arhgap44/Braf/Brwd1/Cdh2/Cdk5r1/Clasp2/Cntn2/Cux2/Dab1/Disc1/Dnm3/Dscam/Dtnbp1/Eef2k/Efna5/Eps8/F2/Fgd4/Fxn/Gas7/Gsk3b/Hecw2/Hnrnpk/Kalrn/Kif13b/Lrrk2/Map2/Nedd4/Nlgn1/Prkn/Pten/Ptprd/Rap2a/Rapgef2/Rcc2/Reln/Robo1/Rtn4r/Rufy3/Sema4f/Sema5a/Ssh2/Syt1/Tbc1d24/Ust/Wnt7a
GO:0034763	negative regulation of transmembrane transport	0.000903211	16	Ahi1/Ank3/Gnb5/Hecw2/Kcnab1/Lmbrd1/Nedd4/Oxsr1/Pid1/Pik3c2a/Ppp2ca/Prkcb/Pten/Stk39/Tgfb2/Ubqln1
GO:0051640	organelle localization	0.000918102	51	Adora2b/Ahi1/Apba2/Arfgap2/Arl8b/Bloc1s6/Braf/Cdh2/Clasp2/Copg2/Dab1/Dnm3/Dtnbp1/Dync1i1/Dync1li2/Eipr1/Erc1/Erc2/Exoc4/Exoc6/Exoc6b/Fmn2/Gbf1/Gsk3b/Lrrk2/Madd/Map2/Map4/Mei1/Ncam1/Nlgn1/Nrxn1/Pax6/Pclo/Prkcb/Prkn/Pten/Rab1a/Rab3c/Sec16b/Snap25/Spag5/Spire1/Stx6/Synj2bp/Syt1/Syt7/Sytl2/Terf1/Vps45/Wnt7a
GO:0016311	dephosphorylation	0.00092622	37	Ankle2/Bag4/Camta1/Csrnp3/Dlg2/Dusp23/Dusp6/Gpatch2/Inpp5f/Lrrc30/Mgat5/Mprip/Nck1/Plppr2/Ppp1r12a/Ppp2ca/Ppp2r2a/Ppp2r2b/Ppp2r5e/Ppp6r3/Pten/Ptpn11/Ptpn4/Ptprd/Ptprj/Ptprk/Ptprm/Ptprn2/Ptprr/Ptprt/Rock1/Rpl5/Ssh2/Swap70/Sytl2/Tgfb2/Vcan
GO:0031503	protein-containing complex localization	0.000936031	26	Adam22/Alkbh5/Anks1b/Ap2b1/Arhgap44/Dlg2/Dnm3/Eny2/Grip2/Gsk3b/Ick/Kalrn/Mapk10/Nedd4/Nlgn1/Nptn/Nptxr/Nrxn1/Rcc2/Reln/Setd2/Sfpq/Snap25/Stxbp6/Synj2bp/Ttc21b
GO:0043087	regulation of GTPase activity	0.000950563	31	Als2/Arap3/Arhgap15/Arhgap42/Arhgap44/Asap1/Asap2/Dennd1b/Dock9/Efna5/Epha3/Epha5/Gnb5/Gsk3b/Kalrn/Lrch1/Lrrk2/Pkp4/Ptprn2/Rabgap1/Ralgapa1/Rapgef2/Rcc2/Rtn4r/Srgap2/Tbc1d1/Tbc1d13/Tbc1d22a/Tbc1d4/Tbc1d9b/Usp6nl
GO:0051961	negative regulation of nervous system development	0.00100845	36	Asap1/Cdk5r1/Cntn2/Cpe/Dab1/Dguok/Dlx1/Dnm3/Dpysl3/Dtnbp1/Epha3/F2/Gsk3b/Hnrnpk/Inpp5f/Lrp6/Lrrk2/Map2/Meis1/Mib1/Nlgn1/Nr2f1/Ntm/Paqr3/Pax6/Plk2/Prkaca/Pten/Rapgef2/Rtn4r/Rufy3/Sema4f/Sema5a/Srgap2/Stmn2/Wnt7a
GO:0008038	neuron recognition	0.00103959	10	Cdk5r1/Cntn2/Dscam/Epha3/Gap43/Ncam1/Nptn/Nrcam/Robo1/Sema5a
GO:0048278	vesicle docking	0.0011096	11	Bloc1s6/Exoc4/Exoc6/Exoc6b/Ncam1/Nrxn1/Rab3c/Stx6/Syt1/Sytl2/Vps45
GO:0010719	negative regulation of epithelial to mesenchymal transition	0.00111423	7	Ldlrad4/Ppp2ca/Pten/Strap/Tgfb2/Tgfbr3/Usf3
GO:0022406	membrane docking	0.00112379	12	Bloc1s6/Exoc4/Exoc6/Exoc6b/Ncam1/Nrxn1/Rab3c/Rock1/Stx6/Syt1/Sytl2/Vps45
GO:1904063	negative regulation of cation transmembrane transport	0.00112379	12	Ank3/Gnb5/Hecw2/Kcnab1/Nedd4/Oxsr1/Pik3c2a/Ppp2ca/Pten/Stk39/Tgfb2/Ubqln1
GO:0097479	synaptic vesicle localization	0.0011325	22	Adora2b/Apba2/Bloc1s6/Braf/Cdh2/Dnm3/Dtnbp1/Erc1/Erc2/Gsk3b/Lrrk2/Madd/Map2/Nlgn1/Nrxn1/Pclo/Prkcb/Pten/Snap25/Syt1/Syt7/Wnt7a
GO:0051650	establishment of vesicle localization	0.00115562	27	Adora2b/Ahi1/Apba2/Arfgap2/Bloc1s6/Braf/Clasp2/Dnm3/Dtnbp1/Dync1i1/Eipr1/Erc1/Erc2/Gbf1/Gsk3b/Lrrk2/Madd/Map2/Nlgn1/Pclo/Prkcb/Rab1a/Sec16b/Snap25/Syt1/Syt7/Wnt7a
GO:0034332	adherens junction organization	0.00121933	17	Add1/Cdh13/Cdh2/Cdh20/Cdh26/Cdh8/Clasp2/Efna5/Epha3/Limch1/Peak1/Pten/Ptprj/Ptprk/Rcc2/Rock1/Vcl
GO:0099565	chemical synaptic transmission, postsynaptic	0.00121934	14	Cux2/Grik2/Grin2a/Gsk3b/Lrrk2/Nlgn1/Nrxn1/Prkn/Pten/Reln/Shank2/Tbc1d24/Tmem108/Wnt7a
GO:1903539	protein localization to postsynaptic membrane	0.00128444	10	Adam22/Arhgap44/Dlg2/Grin2a/Grip2/Gsk3b/Kalrn/Mapk10/Nptxr/Snap25
GO:0030336	negative regulation of cell migration	0.00147041	26	Arap3/Arid2/Braf/Cited2/Clasp2/Dpysl3/Gsk3b/Hnf4a/Ldlrad4/Limch1/Lrch1/Mmrn2/Osbpl8/Plcb1/Pten/Ptprj/Ptprk/Ptprm/Ptprr/Ptprt/Rap2a/Robo1/Srgap2/Strap/Synj2bp/Tgfbr3
GO:0099003	vesicle-mediated transport in synapse	0.00149774	27	Adora2b/Amph/Ap2b1/Apba2/Bloc1s6/Braf/Dnajc6/Dnm3/Dtnbp1/Erc1/Erc2/Grip2/Gsk3b/Lrrk2/Madd/Map2/Mapk10/Nedd4/Nlgn1/Pclo/Prkcb/Rock1/Snap25/Stx6/Syt1/Syt7/Wnt7a
GO:0006903	vesicle targeting	0.00151811	7	Ahi1/Arfgap2/Clasp2/Gbf1/Nlgn1/Pclo/Sec16b
GO:0048514	blood vessel morphogenesis	0.00156634	54	Adam12/Add1/Adgrb3/Adora2b/Akt3/Arid2/Cdh13/Cdh2/Cited2/Col18a1/Col4a1/Col4a3/E2f7/Epas1/Ephb1/Etv2/Hey2/Ism1/Mapk14/Meis1/Minar1/Mmrn2/Myo18b/Nedd4/Nrxn1/Pik3c2a/Pik3r3/Plk2/Prkcb/Prkd1/Prox1/Pten/Ptprj/Ptprm/Rapgef2/Rbm15/Robo1/Rock1/Rora/Sema5a/Setd2/Smoc2/Sox4/Srpk2/Stra6/Synj2bp/Tcf4/Tgfb2/Tgfbr3/Tspan12/Vangl2/Vezf1/Wnt7a/Zfpm2
GO:0050769	positive regulation of neurogenesis	0.00160399	51	Ahi1/Atf1/Atoh1/Braf/Cpeb1/Creb3l2/Cux2/Dab1/Disc1/Dlx1/Dpysl3/Dscam/Eef2k/Efna5/Epha3/Etv5/Fbxo38/Fxn/Fzd1/Gli2/Gsk3b/Hnrnpk/Hspa5/Kalrn/Lrp6/Mir219a-2/Nck1/Ncoa1/Negr1/Nlgn1/Pax6/Prkd1/Prkn/Prox1/Pten/Ptprd/Rapgef2/Reln/Retreg3/Robo1/Rufy3/Sema5a/Shank2/Spen/Stmn2/Syt1/Tbc1d24/Tcf4/Xrcc4/Zeb1/Zfp609
GO:0010976	positive regulation of neuron projection development	0.00164879	36	Ahi1/Atf1/Braf/Cpeb1/Creb3l2/Cux2/Disc1/Dpysl3/Dscam/Eef2k/Efna5/Epha3/Fbxo38/Fxn/Fzd1/Gsk3b/Hnrnpk/Hspa5/Kalrn/Lrp6/Nck1/Negr1/Nlgn1/Prkd1/Prkn/Ptprd/Rapgef2/Reln/Retreg3/Robo1/Rufy3/Sema5a/Shank2/Stmn2/Syt1/Tbc1d24
GO:0099504	synaptic vesicle cycle	0.00199781	24	Adora2b/Amph/Apba2/Braf/Cdh2/Cdk5r1/Dnajc6/Dnm3/Dtnbp1/Erc1/Erc2/Gsk3b/Lrrk2/Nlgn1/Nrxn1/Pclo/Prkcb/Pten/Rock1/Snap25/Stx6/Syt1/Syt7/Wnt7a
GO:0016601	Rac protein signal transduction	0.00202746	7	Als2/Arap3/Arhgap44/Auts2/Cdh13/Eps8/Nckap1
GO:0099560	synaptic membrane adhesion	0.00202746	7	Efna5/Epha3/Flrt3/Lrrc4/Mapk14/Nlgn1/Nrxn1
GO:0044089	positive regulation of cellular component biogenesis	0.00216451	45	Adgrb3/Adgrl3/Apc/Asap1/Auts2/Bag4/Bcl2l11/Braf/Clasp2/Clip1/Clstn2/Cnot6/Cux2/Dnm3/Dpysl3/Eef2k/Efna5/Ephb1/Eps8/Flrt3/Fmn2/Gsk3b/Hdac4/Jmy/Limch1/Nck1/Nckap1/Nlgn1/Nrxn1/Pan3/Pde4dip/Prox1/Ptprd/Ptprj/Rock1/Sept7/Spag5/Spire1/Swap70/Tacr1/Tapt1/Terf1/Tpbg/Ttbk2/Wnt7a
GO:0061024	membrane organization	0.00220368	51	Abca1/Ank3/Ankle2/Arfgap2/Arhgap44/Asap1/Atl2/Atp11b/Bcl2l11/Bloc1s6/Bnip3l/Cdh2/Clip1/Cntn2/Dlg2/Dnm3/Etv5/Gbf1/Gdnf/Grip2/Gsk3b/Insig1/Izumo1r/Lhfpl4/Lrrc4/Mapk10/Mbp/Mtch2/Nlgn1/Nrcam/Nrxn1/Plekha3/Pqlc1/Prkn/Pten/Ptprd/Rab1a/Reln/Sec16b/Slc25a46/Snap25/Spaca3/Spire1/Stx6/Stxbp6/Syt1/Syt7/Tbc1d4/Tgfb2/Tmem170/Tram2
GO:0022411	cellular component disassembly	0.00221581	31	Add1/Apc/Arid2/Bnip3l/Capza2/Cebpg/Clasp2/Ctss/Dedd2/Dnajc6/Eps8/Fbxo7/Gabarapl1/Gbf1/Gspt1/Klc1/Map2/Mgea5/Nckap5/Prkn/Pym1/Sema5a/Snx14/Sptan1/Stmn2/Stmn4/Swap70/Tgfb2/Ttbk2/Ubqln1/Vill
GO:0046620	regulation of organ growth	0.00222902	15	Apc/Bcl2l11/Cited2/Dusp6/Foxp1/Fxn/Hey2/Jarid2/Mapk14/Meis1/Ncam1/Prox1/Pten/Tgfbr3/Zfpm2
GO:0060419	heart growth	0.00222902	15	Apc/Arid2/Cited2/Dusp6/Foxp1/Hey2/Jarid2/Mapk14/Meis1/Ncam1/Prox1/Pten/Tgfb2/Tgfbr3/Zfpm2
GO:0098693	regulation of synaptic vesicle cycle	0.00223204	17	Adora2b/Apba2/Braf/Cdh2/Cdk5r1/Dnm3/Dtnbp1/Gsk3b/Lrrk2/Nlgn1/Nrxn1/Prkcb/Pten/Rock1/Syt1/Syt7/Wnt7a
GO:0001568	blood vessel development	0.00224123	60	Adam12/Add1/Adgrb3/Adora2b/Akt3/Ankrd17/Ap2b1/Arid2/Cdh13/Cdh2/Cited2/Col18a1/Col1a1/Col4a1/Col4a3/E2f7/Epas1/Ephb1/Etv2/Foxo1/Hey2/Ism1/Mapk14/Meis1/Mib1/Minar1/Mmrn2/Myo18b/Nedd4/Nrxn1/Pax6/Pik3c2a/Pik3r3/Plk2/Prkcb/Prkd1/Prox1/Pten/Ptprj/Ptprm/Rapgef2/Rbm15/Robo1/Rock1/Rora/Sema5a/Setd2/Smoc2/Sox4/Srpk2/Stra6/Synj2bp/Tcf4/Tgfb2/Tgfbr3/Tspan12/Vangl2/Vezf1/Wnt7a/Zfpm2
GO:0140056	organelle localization by membrane tethering	0.00228672	11	Bloc1s6/Exoc4/Exoc6/Exoc6b/Ncam1/Nrxn1/Rab3c/Stx6/Syt1/Sytl2/Vps45
GO:0048638	regulation of developmental growth	0.00230008	36	Apc/Atxn2/Bcl2l11/Cdk5r1/Cited2/Clasp2/Disc1/Dscam/Dusp6/Efna5/Foxp1/Fto/Fxn/Ghr/Gsk3b/Hey2/Hnrnpk/Jarid2/Map2/Mapk14/Meis1/Ncam1/Plcb1/Prkn/Prox1/Pten/Ptpn11/Rtn4r/Rufy3/Sema4f/Sema5a/Stat5a/Syt1/Tgfbr3/Zfpm2/Zp3
GO:0032413	negative regulation of ion transmembrane transporter activity	0.00231262	10	Ank3/Gnb5/Hecw2/Kcnab1/Nedd4/Oxsr1/Ppp2ca/Pten/Stk39/Ubqln1
GO:0099072	regulation of postsynaptic membrane neurotransmitter receptor levels	0.00247938	14	Adam22/Ap2b1/Arhgap44/Dlg2/Dnm3/Eps8/Frrs1l/Grip2/Gsk3b/Kalrn/Mapk10/Nedd4/Nptxr/Snap25
GO:0048013	ephrin receptor signaling pathway	0.00250277	8	Cdk5r1/Efna5/Epha3/Epha5/Ephb1/Nck1/Ptpn11/Ss18
GO:0016339	calcium-dependent cell-cell adhesion via plasma membrane cell adhesion molecules	0.00265954	7	Cdh13/Cdh2/Cdh20/Cdh26/Cdh8/Nlgn1/Nrxn1
GO:0006935	chemotaxis	0.00270396	45	Ablim1/Alcam/Ank3/Apbb2/Atoh1/Cdh13/Cdk5r1/Cntn2/Dock4/Dscam/Edn2/Efna5/Enah/Epha5/Ephb1/Flrt3/Foxp1/Gap43/Gbf1/Gdnf/Gli2/Gpr183/Ispd/Klf7/Lyst/Mapk14/Ncam1/Nptn/Nrcam/Oxsr1/Pax6/Prkd1/Ptprj/Ptprm/Reln/Robo1/Sema4f/Sema5a/Smoc2/Stk39/Swap70/Tenm2/Tgfb2/Unc5a/Vangl2
GO:0007610	behavior	0.00283444	59	Adam22/Adgrb3/Adgrl3/Ahi1/Als2/Amph/Apba2/Auts2/Braf/Cntn2/Cntnap4/Cux2/Dab1/Dscam/Eps8/Etv5/Foxp1/Fxn/Gpr39/Gria1/Grik2/Grin2a/Homer1/Inpp5f/Kalrn/Kcnab1/Kcnd2/Kirrel3/Lmx1b/Lrrk2/Lrrn4/Lsamp/Lypd1/Mapk10/Meis1/Napepld/Ncam1/Ncoa1/Negr1/Nlgn1/Npas3/Nrxn1/Pax6/Pja2/Plcb1/Plk2/Prkn/Pten/Reln/Sdk1/Sez6l/Shank2/Slc1a3/Snap25/Spire1/Stra6/Tacr1/Trpc2/Unc79
GO:2000146	negative regulation of cell motility	0.00286772	26	Arap3/Arid2/Braf/Cited2/Clasp2/Dpysl3/Gsk3b/Hnf4a/Ldlrad4/Limch1/Lrch1/Mmrn2/Osbpl8/Plcb1/Pten/Ptprj/Ptprk/Ptprm/Ptprr/Ptprt/Rap2a/Robo1/Srgap2/Strap/Synj2bp/Tgfbr3
GO:0021535	cell migration in hindbrain	0.00289152	5	Ctnna2/Dab1/Lrp6/Rere/Ttbk2
GO:0097091	synaptic vesicle clustering	0.00289152	5	Cdh2/Nlgn1/Nrxn1/Pclo/Pten
GO:0010721	negative regulation of cell development	0.0029707	36	Asap1/Cdk5r1/Cntn2/Dab1/Dguok/Dlx1/Dnm3/Dpysl3/Dtnbp1/Efna5/Epha3/F2/Foxp1/Grb14/Gsk3b/Inpp5f/Lrrk2/Map2/Meis1/Mib1/Nlgn1/Nr2f1/Ntm/Paqr3/Pax6/Plk2/Pten/Rapgef2/Rcc2/Rtn4r/Rufy3/Sema4f/Sema5a/Srgap2/Stmn2/Wnt7a
GO:0042330	taxis	0.00301485	45	Ablim1/Alcam/Ank3/Apbb2/Atoh1/Cdh13/Cdk5r1/Cntn2/Dock4/Dscam/Edn2/Efna5/Enah/Epha5/Ephb1/Flrt3/Foxp1/Gap43/Gbf1/Gdnf/Gli2/Gpr183/Ispd/Klf7/Lyst/Mapk14/Ncam1/Nptn/Nrcam/Oxsr1/Pax6/Prkd1/Ptprj/Ptprm/Reln/Robo1/Sema4f/Sema5a/Smoc2/Stk39/Swap70/Tenm2/Tgfb2/Unc5a/Vangl2
GO:0001837	epithelial to mesenchymal transition	0.00312391	17	Axin2/Clasp2/Col1a1/Epha3/Gsk3b/Hey2/Ldlrad4/Lrp6/Nfatc1/Ppp2ca/Pten/Strap/Tgfb2/Tgfbr3/Usf3/Vangl2/Wnt16
GO:0001941	postsynaptic membrane organization	0.00313143	8	Cdh2/Etv5/Gdnf/Lhfpl4/Lrrc4/Nlgn1/Nrxn1/Reln
GO:0021795	cerebral cortex cell migration	0.00313143	8	Cdk5r1/Dab1/Disc1/Efhc1/Lrp6/Reln/Robo1/Srgap2
GO:0060322	head development	0.00313174	57	Adgrl3/Ahi1/Akt3/Atoh1/Atxn2/Braf/Cdh2/Cdk5r1/Cntn2/Col1a1/Col4a1/Ctnna2/Dab1/Disc1/Dlx1/Efhc1/Efna5/Epha5/Flrt3/Gli2/Gsk3b/Hnrnpk/Hspa5/Immp2l/Kirrel3/Lmx1b/Lrp6/Lrrk2/Macrod2/Mkl1/Ncam1/Ndufs4/Nr2f1/Nrxn1/Pax6/Pgap1/Plcb1/Prox1/Pten/Ptpn11/Rapgef2/Reln/Rere/Robo1/Rora/Rtn4r/Sema5a/Setd2/Sez6l/Shank2/Srgap2/Stra6/Tgfb2/Tmem108/Ttbk2/Ttc21b/Wnt7a
GO:0022037	metencephalon development	0.00323438	15	Atxn2/Cdk5r1/Dab1/Gli2/Hspa5/Lmx1b/Lrp6/Nrxn1/Prox1/Ptpn11/Rere/Rora/Sez6l/Ttbk2/Wnt7a
GO:0043547	positive regulation of GTPase activity	0.00330474	23	Als2/Arap3/Arhgap42/Asap1/Asap2/Dennd1b/Dock9/Gnb5/Gsk3b/Kalrn/Pkp4/Rabgap1/Ralgapa1/Rapgef2/Rcc2/Rtn4r/Srgap2/Tbc1d1/Tbc1d13/Tbc1d22a/Tbc1d4/Tbc1d9b/Usp6nl
GO:0022029	telencephalon cell migration	0.00330615	10	Cdk5r1/Cntn2/Dab1/Disc1/Efhc1/Lrp6/Lrrk2/Reln/Robo1/Srgap2
GO:0003231	cardiac ventricle development	0.00335154	18	Ap2b1/Cited2/Cpe/Fzd1/Hey2/Lrp6/Matr3/Nfatc1/Prox1/Rbm15/Robo1/Ryr2/Sox4/Stra6/Tgfb2/Tgfbr3/Vangl2/Zfpm2
GO:0014829	vascular smooth muscle contraction	0.00345663	6	Arhgap42/Cacna1g/Dock4/Edn2/Grip2/Slc8a1
GO:0051493	regulation of cytoskeleton organization	0.0035031	44	Add1/Apc/Arhgap44/Bag4/Braf/Capza2/Cd2ap/Cdk5r1/Clasp2/Clip1/Dst/Efna5/Epha3/Epha5/Eps8/Fchsd2/Fmn2/Gsk3b/Jmy/Limch1/Map2/Nck1/Nckap1/Pde4dip/Plk2/Ppfia1/Prkaa2/Prkn/Prox1/Rock1/Sema5a/Spag5/Spire1/Sptan1/Ssh2/Stmn2/Stmn4/Swap70/Tacr1/Terf1/Tgfb2/Ttbk2/Vangl2/Vill
GO:0051261	protein depolymerization	0.00364252	15	Add1/Apc/Capza2/Clasp2/Dnajc6/Eps8/Map2/Nckap5/Sema5a/Sptan1/Stmn2/Stmn4/Swap70/Ttbk2/Vill
GO:0055021	regulation of cardiac muscle tissue growth	0.00371048	11	Apc/Cited2/Foxp1/Hey2/Jarid2/Mapk14/Meis1/Ncam1/Pten/Tgfbr3/Zfpm2
GO:0050768	negative regulation of neurogenesis	0.00377882	32	Asap1/Cdk5r1/Cntn2/Dab1/Dguok/Dlx1/Dnm3/Dpysl3/Dtnbp1/Epha3/F2/Gsk3b/Inpp5f/Lrrk2/Map2/Meis1/Mib1/Nlgn1/Nr2f1/Ntm/Paqr3/Pax6/Plk2/Pten/Rapgef2/Rtn4r/Rufy3/Sema4f/Sema5a/Srgap2/Stmn2/Wnt7a
GO:0007626	locomotory behavior	0.00391213	26	Adam22/Adgrl3/Als2/Apba2/Cntn2/Dab1/Dscam/Eps8/Etv5/Fxn/Grin2a/Inpp5f/Kalrn/Kcnd2/Lmx1b/Lrrk2/Lsamp/Mapk10/Meis1/Negr1/Npas3/Prkn/Pten/Reln/Sez6l/Snap25
GO:0034766	negative regulation of ion transmembrane transport	0.0039641	12	Ank3/Gnb5/Hecw2/Kcnab1/Nedd4/Oxsr1/Pik3c2a/Ppp2ca/Pten/Stk39/Tgfb2/Ubqln1
GO:0008037	cell recognition	0.00412997	14	Cdk5r1/Cntn2/Dscam/Epha3/Ephb1/Gap43/Izumo1r/Ncam1/Nptn/Nrcam/Robo1/Sema5a/Spaca3/Zp3
GO:0060044	negative regulation of cardiac muscle cell proliferation	0.00419276	5	Apc/Cited2/Jarid2/Meis1/Pten
GO:2001224	positive regulation of neuron migration	0.00419276	5	Pax6/Rapgef2/Reln/Tbc1d24/Zfp609
GO:0030010	establishment of cell polarity	0.00429281	17	Cyth3/Ephb1/Exoc4/Gbf1/Gsk3b/Map2/Map4/Pard3b/Pax6/Prickle2/Rock1/Rufy3/Sdccag8/Spag5/Ust/Vangl2/Wnt7a
GO:0044091	membrane biogenesis	0.00436539	7	Ank3/Cdh2/Exoc4/Nlgn1/Nrxn1/Pten/Ptprd
GO:0010720	positive regulation of cell development	0.00437108	54	Add1/Ahi1/Atf1/Atoh1/Braf/Cpeb1/Creb3l2/Cux2/Dab1/Disc1/Dlx1/Dpysl3/Dscam/Eef2k/Efna5/Epha3/Etv5/Fbxo38/Fxn/Fzd1/Gli2/Gpr68/Gsk3b/Hnrnpk/Hspa5/Kalrn/Lrp6/Mir219a-2/Nck1/Ncoa1/Negr1/Nlgn1/Pax6/Pde3a/Prkd1/Prkn/Prox1/Pten/Ptprd/Rapgef2/Reln/Retreg3/Robo1/Rufy3/Sema5a/Shank2/Spen/Stmn2/Syt1/Tbc1d24/Tcf4/Xrcc4/Zeb1/Zfp609
GO:0001764	neuron migration	0.00442059	20	Adgrl3/Apbb2/Atoh1/Auts2/Cdk5r1/Cntn2/Dab1/Disc1/Gsk3b/Kirrel3/Lmx1b/Mkl1/Nr2f1/Pax6/Rapgef2/Reln/Sdccag8/Srgap2/Tbc1d24/Zfp609
GO:0021697	cerebellar cortex formation	0.00459531	6	Atxn2/Nrxn1/Prox1/Ptpn11/Rora/Wnt7a
GO:0055022	negative regulation of cardiac muscle tissue growth	0.00459531	6	Apc/Cited2/Foxp1/Jarid2/Meis1/Pten
GO:0061117	negative regulation of heart growth	0.00459531	6	Apc/Cited2/Foxp1/Jarid2/Meis1/Pten
GO:0007169	transmembrane receptor protein tyrosine kinase signaling pathway	0.00462215	47	Ahi1/Apc/Cdh13/Cdk5r1/Clasp2/Col1a1/Col4a1/Col4a3/Efna5/Epha3/Epha5/Ephb1/Flrt3/Foxo1/Garem1/Gdnf/Ghr/Grb14/Gsk3b/Hip1/Lmbrd1/Mapk14/Mmrn2/Nck1/Nedd4/Nrxn1/Osbpl8/Phf14/Pid1/Pik3r3/Plcb1/Prkcb/Prkd1/Pten/Ptpn11/Ptprj/Ptprr/Ptprt/Rapgef2/Robo1/Sik2/Smoc2/Ss18/Stat5a/Tcf4/Tmem108/Vwa2
GO:0060411	cardiac septum morphogenesis	0.00465579	13	Cited2/Fzd1/Hey2/Lrp6/Nfatc1/Prox1/Rbm15/Robo1/Sox4/Tgfb2/Tgfbr3/Vangl2/Zfpm2
GO:0007017	microtubule-based process	0.00478646	54	Apc/Bloc1s6/Cdk5r1/Cfap298/Clasp2/Clip1/Cntn2/Copg2/Disc1/Dlg2/Dst/Dtnbp1/Dync1i1/Dync1li2/Efhc1/Efna5/Epha3/Fmn2/Gsk3b/Ick/Iqcg/Katnal1/Kif13b/Kif21a/Klc1/Lrguk/Lrrc6/Lyst/Madd/Map2/Map4/Nckap5/Pard3b/Pax6/Pde4dip/Plk2/Ppp1r12a/Prkaa2/Rab1a/Rcc1/Sdccag8/Setd2/Sfpq/Sgo1/Spag5/Spire1/Srgap2/Ss18/Stmn2/Stmn4/Terf1/Tmem108/Ttbk2/Ttc21b
GO:0043624	cellular protein complex disassembly	0.00495877	16	Add1/Apc/Capza2/Clasp2/Dnajc6/Eps8/Gspt1/Map2/Nckap5/Sema5a/Sptan1/Stmn2/Stmn4/Swap70/Ttbk2/Vill
GO:1901880	negative regulation of protein depolymerization	0.00500092	11	Add1/Apc/Capza2/Clasp2/Eps8/Map2/Sptan1/Stmn2/Swap70/Ttbk2/Vill
GO:1901879	regulation of protein depolymerization	0.00520871	12	Add1/Apc/Capza2/Clasp2/Eps8/Map2/Sema5a/Sptan1/Stmn2/Swap70/Ttbk2/Vill
GO:0055024	regulation of cardiac muscle tissue development	0.00527666	13	Apc/Cited2/Foxp1/Gsk3b/Hey2/Jarid2/Lrp6/Mapk14/Meis1/Ncam1/Pten/Tgfbr3/Zfpm2
GO:0007420	brain development	0.00529314	52	Adgrl3/Ahi1/Akt3/Atoh1/Atxn2/Cdh2/Cdk5r1/Cntn2/Col4a1/Ctnna2/Dab1/Disc1/Dlx1/Efhc1/Efna5/Epha5/Gli2/Gsk3b/Hnrnpk/Hspa5/Immp2l/Kirrel3/Lmx1b/Lrp6/Lrrk2/Macrod2/Mkl1/Ncam1/Ndufs4/Nr2f1/Nrxn1/Pax6/Pgap1/Plcb1/Prox1/Pten/Ptpn11/Rapgef2/Reln/Rere/Robo1/Rora/Rtn4r/Sema5a/Setd2/Sez6l/Shank2/Srgap2/Tmem108/Ttbk2/Ttc21b/Wnt7a
GO:0021885	forebrain cell migration	0.00540162	10	Cdk5r1/Cntn2/Dab1/Disc1/Efhc1/Lrp6/Lrrk2/Reln/Robo1/Srgap2
GO:0031646	positive regulation of neurological system process	0.00540162	10	Cux2/Grin2a/Gsk3b/Nlgn1/Nrxn1/Pten/Reln/Shank2/Tbc1d24/Wnt7a
GO:0055026	negative regulation of cardiac muscle tissue development	0.00547769	7	Apc/Cited2/Foxp1/Jarid2/Lrp6/Meis1/Pten
GO:0043242	negative regulation of protein complex disassembly	0.00576716	11	Add1/Apc/Capza2/Clasp2/Eps8/Map2/Sptan1/Stmn2/Swap70/Ttbk2/Vill
GO:0050770	regulation of axonogenesis	0.00584849	22	Braf/Cdh2/Cdk5r1/Clasp2/Cntn2/Dab1/Disc1/Dscam/Efna5/Fxn/Gsk3b/Kif13b/Map2/Pten/Robo1/Rtn4r/Rufy3/Sema4f/Sema5a/Ssh2/Ust/Wnt7a
GO:0003184	pulmonary valve morphogenesis	0.00586344	5	Hey2/Nfatc1/Robo1/Stra6/Tgfb2
GO:0021801	cerebral cortex radial glia guided migration	0.00586344	5	Cdk5r1/Dab1/Disc1/Reln/Srgap2
GO:0022030	telencephalon glial cell migration	0.00586344	5	Cdk5r1/Dab1/Disc1/Reln/Srgap2
GO:0032410	negative regulation of transporter activity	0.00629294	10	Ank3/Gnb5/Hecw2/Kcnab1/Nedd4/Oxsr1/Ppp2ca/Pten/Stk39/Ubqln1
GO:0010921	regulation of phosphatase activity	0.00636312	15	Bag4/Csrnp3/Dlg2/Gpatch2/Mgat5/Mprip/Ppp1r12a/Ppp2ca/Ppp2r2b/Ppp6r3/Rock1/Rpl5/Sytl2/Tgfb2/Vcan
GO:0051345	positive regulation of hydrolase activity	0.00644779	42	Als2/Arap3/Arhgap42/Asap1/Asap2/Bcl2l11/Col4a3/Dennd1b/Dock9/Gnb5/Gsk3b/Hip1/Kalrn/Lrrk2/Map3k5/Mapk14/Mbp/Msh3/Mtch2/Nek5/Pkp4/Pot1a/Ppp1r12a/Ppp2ca/Prkd1/Rabgap1/Ralgapa1/Rapgef2/Rcc2/Robo1/Rpl5/Rtn4r/Ryr2/Srgap2/St18/Tbc1d1/Tbc1d13/Tbc1d22a/Tbc1d4/Tbc1d9b/Tor1aip2/Usp6nl
GO:0030902	hindbrain development	0.00659871	18	Ahi1/Atxn2/Cdk5r1/Ctnna2/Dab1/Gli2/Hspa5/Lmx1b/Lrp6/Nrxn1/Pax6/Prox1/Ptpn11/Rere/Rora/Sez6l/Ttbk2/Wnt7a
GO:0035303	regulation of dephosphorylation	0.00659871	18	Ankle2/Bag4/Camta1/Csrnp3/Dlg2/Gpatch2/Mgat5/Mprip/Ppp1r12a/Ppp2ca/Ppp2r2b/Ppp6r3/Rock1/Rpl5/Swap70/Sytl2/Tgfb2/Vcan
GO:0048755	branching morphogenesis of a nerve	0.00667082	4	Cpe/Hnrnpk/Lrrk2/Rere
GO:1902805	positive regulation of synaptic vesicle transport	0.00667082	4	Map2/Nlgn1/Syt1/Syt7
GO:0080135	regulation of cellular response to stress	0.00670525	50	Akt3/Axin2/Braf/Cebpg/Dact1/Dtnbp1/Edar/Ephb1/Fbxo7/Fgd4/Fmn2/Foxo1/Foxp1/Fut8/Fzd1/Grik2/Helb/Hipk3/Hnrnpk/Inpp5f/Insig1/Lmnb1/Lrrk2/Map3k5/Mink1/Mtch2/Nck1/Pja2/Plcb1/Plk2/Prkn/Pten/Rap2a/Rmi2/Rtn4r/Setd2/Sfpq/Sh3rf3/Spire1/Tbc1d24/Tgfb2/Ubqln1/Usp25/Usp47/Vangl2/Wdr76/Wnt16/Wnt7a/Xrcc4/Zmynd11
GO:0048489	synaptic vesicle transport	0.00674148	19	Adora2b/Apba2/Bloc1s6/Braf/Dnm3/Dtnbp1/Erc1/Erc2/Gsk3b/Lrrk2/Madd/Map2/Nlgn1/Pclo/Prkcb/Snap25/Syt1/Syt7/Wnt7a
GO:0097480	establishment of synaptic vesicle localization	0.00674148	19	Adora2b/Apba2/Bloc1s6/Braf/Dnm3/Dtnbp1/Erc1/Erc2/Gsk3b/Lrrk2/Madd/Map2/Nlgn1/Pclo/Prkcb/Snap25/Syt1/Syt7/Wnt7a
GO:0021696	cerebellar cortex morphogenesis	0.00678934	7	Atxn2/Gli2/Nrxn1/Prox1/Ptpn11/Rora/Wnt7a
GO:0060074	synapse maturation	0.00678934	7	Disc1/Hnrnpk/Nfia/Nrxn1/Pten/Reln/Sez6l
GO:0051271	negative regulation of cellular component movement	0.0070972	28	Arap3/Arid2/Braf/Cited2/Clasp2/Dpysl3/Gsk3b/Hnf4a/Ldlrad4/Limch1/Lrch1/Mmrn2/Osbpl8/Plcb1/Pten/Ptprj/Ptprk/Ptprm/Ptprr/Ptprt/Rap2a/Robo1/Sema4f/Sema5a/Srgap2/Strap/Synj2bp/Tgfbr3
GO:0030032	lamellipodium assembly	0.00729449	10	Ablim1/Auts2/Cdh13/Fgd4/Hdac4/Nck1/Nckap1/Srgap2/Ssh2/Vcl
GO:0032956	regulation of actin cytoskeleton organization	0.00732219	31	Add1/Arhgap44/Bag4/Braf/Capza2/Cd2ap/Cdk5r1/Clasp2/Efna5/Epha3/Epha5/Eps8/Fchsd2/Fmn2/Jmy/Limch1/Nck1/Nckap1/Ppfia1/Prkn/Prox1/Rock1/Sema5a/Spire1/Sptan1/Ssh2/Swap70/Tacr1/Tgfb2/Vangl2/Vill
GO:0051129	negative regulation of cellular component organization	0.00740774	54	Add1/Apc/Asap1/Atad2b/Atxn2/Bag4/Capza2/Cdk5r1/Clasp2/Dab1/Dact1/Dguok/Dnm3/Dpysl3/Dtnbp1/Efna5/Epha3/Eps8/Fxn/Gsk3b/Hey2/Hnrnpc/Inpp5f/Insig1/Jarid2/Ldlrad4/Lrrk2/Map2/Map4/Nlgn1/Nr2f1/Nrxn1/Ntm/Paqr3/Plk2/Pot1a/Ppfia1/Prkn/Pten/Rapgef2/Rcc2/Rock1/Rtn4r/Rufy3/Sema4f/Sema5a/Sptan1/Stmn2/Swap70/Tbc1d4/Terf1/Ttbk2/Vill/Xrcc4
GO:0035304	regulation of protein dephosphorylation	0.00757482	11	Ankle2/Camta1/Mgat5/Mprip/Ppp1r12a/Ppp2ca/Ppp2r2b/Ppp6r3/Rock1/Swap70/Vcan
GO:0071709	membrane assembly	0.00766385	6	Ank3/Cdh2/Nlgn1/Nrxn1/Pten/Ptprd
GO:0003177	pulmonary valve development	0.00795274	5	Hey2/Nfatc1/Robo1/Stra6/Tgfb2
GO:0030252	growth hormone secretion	0.00795274	5	Kalrn/Madd/Mgea5/Ptpn11/Rab1a
GO:0031290	retinal ganglion cell axon guidance	0.00795274	5	Efna5/Ephb1/Nrcam/Ptprm/Sema4f
GO:0060850	regulation of transcription involved in cell fate commitment	0.00795274	5	Dlx1/Etv2/Pax6/Prox1/Rora
GO:1903391	regulation of adherens junction organization	0.00841487	10	Add1/Clasp2/Efna5/Epha3/Limch1/Peak1/Pten/Ptprj/Rcc2/Rock1
GO:0009410	response to xenobiotic stimulus	0.00844774	17	Acsl1/Adgrl3/Gdnf/Ghr/Grin2a/Hnf4a/Homer1/Kalrn/Ncam1/Ppp2r2a/Prkaa2/Rora/Ryr2/Sdk1/Slc8a1/Smyd3/Stat5a
GO:0043244	regulation of protein complex disassembly	0.00845221	13	Add1/Apc/Capza2/Clasp2/Eps8/Map2/Mgea5/Sema5a/Sptan1/Stmn2/Swap70/Ttbk2/Vill
GO:0055017	cardiac muscle tissue growth	0.00845221	13	Apc/Arid2/Cited2/Foxp1/Hey2/Jarid2/Mapk14/Meis1/Ncam1/Pten/Tgfb2/Tgfbr3/Zfpm2
GO:0050804	modulation of chemical synaptic transmission	0.00848761	48	Adora2b/Akap12/Apba2/Braf/Cdh2/Clstn2/Cntn2/Cntnap4/Cpeb1/Cux2/Disc1/Dtnbp1/Ephb1/Gdnf/Gria1/Grik2/Grin2a/Gsk3b/Hnrnpk/Homer1/Kalrn/Lrrc4/Lrrk2/Ncam1/Nedd4/Nlgn1/Nptn/Nptxr/Nrxn1/Plcb1/Plcb4/Plk2/Prkaca/Prkcb/Prkn/Pten/Ptprd/Rapgef2/Reln/Shank2/Slc1a3/Snap25/Syt1/Syt7/Tacr1/Tbc1d24/Tmem108/Wnt7a
GO:0007215	glutamate receptor signaling pathway	0.00862021	12	Cdk5r1/Frrs1l/Grin2a/Homer1/Kalrn/Mink1/Nlgn1/Nrxn1/Plcb1/Reln/Shank2/Trpm1
GO:0006511	ubiquitin-dependent protein catabolic process	0.00865016	40	Ankib1/Arih1/Ate1/Cd2ap/Clock/Cul1/Disc1/Fbxl17/Fbxl18/Fbxl7/Fbxo7/Gsk3b/Hecw2/Herc2/Hspa5/Klhl20/Lnx1/Lrrk2/Ltn1/Nedd4/Nrros/Otud7a/Pcbp2/Plk2/Prkn/Psmd14/Pten/Rnf121/Rnf133/Rnf217/Rpl5/Smurf2/Trim2/Ube2k/Ubqln1/Ubr2/Usp25/Usp47/Usp49/Vps36
GO:0099177	regulation of trans-synaptic signaling	0.00887226	48	Adora2b/Akap12/Apba2/Braf/Cdh2/Clstn2/Cntn2/Cntnap4/Cpeb1/Cux2/Disc1/Dtnbp1/Ephb1/Gdnf/Gria1/Grik2/Grin2a/Gsk3b/Hnrnpk/Homer1/Kalrn/Lrrc4/Lrrk2/Ncam1/Nedd4/Nlgn1/Nptn/Nptxr/Nrxn1/Plcb1/Plcb4/Plk2/Prkaca/Prkcb/Prkn/Pten/Ptprd/Rapgef2/Reln/Shank2/Slc1a3/Snap25/Syt1/Syt7/Tacr1/Tbc1d24/Tmem108/Wnt7a
GO:0001952	regulation of cell-matrix adhesion	0.00908281	14	Cdh13/Clasp2/Disc1/Efna5/Epha3/Gsk3b/Limch1/Mink1/Peak1/Pten/Ptprj/Rcc2/Rock1/Utrn
GO:0030900	forebrain development	0.00971437	34	Atoh1/Cdh2/Cdk5r1/Cntn2/Dab1/Disc1/Dlx1/Efhc1/Epha5/Gli2/Gsk3b/Hnrnpk/Kirrel3/Lrp6/Lrrk2/Mkl1/Ncam1/Nr2f1/Pax6/Pgap1/Plcb1/Prox1/Pten/Rapgef2/Reln/Robo1/Rtn4r/Sema5a/Setd2/Srgap2/Tmem108/Ttbk2/Ttc21b/Wnt7a
GO:0006983	ER overload response	0.00979977	4	Atg10/Bcl2l11/Gsk3b/Hspa5
GO:0021681	cerebellar granular layer development	0.00979977	4	Nrxn1/Prox1/Ttbk2/Wnt7a
GO:0098969	neurotransmitter receptor transport to postsynaptic membrane	0.00979977	4	Arhgap44/Grip2/Mapk10/Snap25
GO:0008347	glial cell migration	0.00982765	8	Cdk5r1/Dab1/Disc1/Gpr183/Reln/Srgap2/Tgfb2/Vcan
GO:0019941	modification-dependent protein catabolic process	0.0100236	40	Ankib1/Arih1/Ate1/Cd2ap/Clock/Cul1/Disc1/Fbxl17/Fbxl18/Fbxl7/Fbxo7/Gsk3b/Hecw2/Herc2/Hspa5/Klhl20/Lnx1/Lrrk2/Ltn1/Nedd4/Nrros/Otud7a/Pcbp2/Plk2/Prkn/Psmd14/Pten/Rnf121/Rnf133/Rnf217/Rpl5/Smurf2/Trim2/Ube2k/Ubqln1/Ubr2/Usp25/Usp47/Usp49/Vps36
GO:0008286	insulin receptor signaling pathway	0.0100669	14	Apc/Foxo1/Grb14/Gsk3b/Lmbrd1/Nck1/Osbpl8/Pid1/Pik3r3/Plcb1/Prkcb/Ptpn11/Sik2/Vwa2
GO:0046621	negative regulation of organ growth	0.010091	7	Apc/Cited2/Foxp1/Fxn/Jarid2/Meis1/Pten
GO:0045838	positive regulation of membrane potential	0.0105075	5	Ank3/Gria1/Gsk3b/Prkn/Tmem135
GO:1901017	negative regulation of potassium ion transmembrane transporter activity	0.0105075	5	Ank3/Kcnab1/Oxsr1/Pten/Stk39
GO:0043113	receptor clustering	0.0106775	9	Cdh2/Dlg2/Etv5/Grik2/Lhfpl4/Nlgn1/Nrxn1/Reln/Synj2bp
GO:0003279	cardiac septum development	0.0108256	16	Ap2b1/Cited2/Fzd1/Hey2/Lrp6/Matr3/Nfatc1/Prox1/Rbm15/Robo1/Sox4/Stra6/Tgfb2/Tgfbr3/Vangl2/Zfpm2
GO:1902903	regulation of supramolecular fiber organization	0.0108309	30	Add1/Apc/Bag4/Braf/Capza2/Clasp2/Clip1/Eps8/Fchsd2/Fmn2/Jmy/Limch1/Map2/Nck1/Nckap1/Pde4dip/Ppfia1/Prkn/Prox1/Rock1/Sema5a/Spire1/Sptan1/Ssh2/Stmn2/Swap70/Tacr1/Terf1/Ttbk2/Vill
GO:0071417	cellular response to organonitrogen compound	0.011036	40	Akt3/Apc/Cacna2d1/Col1a1/Col4a1/Cpeb1/Foxo1/Gabpa/Ghr/Grb14/Grin2a/Gsk3b/Hnrnpk/Itpr1/Lmbrd1/Lrrk2/Mir346/Mir365-1/Nck1/Osbpl8/Pde3a/Pid1/Pik3r3/Plcb1/Prkcb/Prkn/Pten/Ptpn11/Rapgef2/Rock1/Rragc/Ryr2/Sesn1/Sik2/Slc8a1/Stat5a/Tbc1d4/Ubr2/Vwa2/Zeb1
GO:0007528	neuromuscular junction development	0.011564	8	Als2/Col4a1/Etv5/Kalrn/Lrrk2/Nedd4/Shank2/Utrn
GO:0043666	regulation of phosphoprotein phosphatase activity	0.011564	8	Mgat5/Mprip/Ppp1r12a/Ppp2ca/Ppp2r2b/Ppp6r3/Rock1/Vcan
GO:0035265	organ growth	0.0117184	21	Apc/Arid2/Bcl2l11/Cited2/Dusp6/Foxp1/Fxn/Hey2/Jarid2/Lmx1b/Mapk14/Meis1/Ncam1/Prox1/Pten/Ptpn11/Tgfb2/Tgfbr3/Vit/Vwa2/Zfpm2
GO:0021537	telencephalon development	0.0117469	24	Atoh1/Cdh2/Cdk5r1/Cntn2/Dab1/Disc1/Dlx1/Efhc1/Epha5/Gsk3b/Hnrnpk/Kirrel3/Lrp6/Lrrk2/Nr2f1/Pax6/Plcb1/Prox1/Pten/Reln/Robo1/Rtn4r/Srgap2/Tmem108
GO:0072599	establishment of protein localization to endoplasmic reticulum	0.0119844	6	Ryr2/Sec63/Spcs2/Srp19/Srp72/Tram2
GO:0030218	erythrocyte differentiation	0.0122847	14	Add1/Arid4a/Cebpg/Cited2/Epas1/Etv2/Exoc6/Kmt2e/Mapk14/Plcb1/Rcor1/Sfxn1/Stat5a/Tgfbr3
GO:0051893	regulation of focal adhesion assembly	0.0123222	9	Clasp2/Efna5/Epha3/Limch1/Peak1/Pten/Ptprj/Rcc2/Rock1
GO:0090109	regulation of cell-substrate junction assembly	0.0123222	9	Clasp2/Efna5/Epha3/Limch1/Peak1/Pten/Ptprj/Rcc2/Rock1
GO:0040013	negative regulation of locomotion	0.0124	28	Arap3/Arid2/Braf/Cited2/Clasp2/Dpysl3/Gsk3b/Hnf4a/Ldlrad4/Limch1/Lrch1/Mmrn2/Osbpl8/Plcb1/Pten/Ptprj/Ptprk/Ptprm/Ptprr/Ptprt/Rap2a/Robo1/Sema4f/Sema5a/Srgap2/Strap/Synj2bp/Tgfbr3
GO:0009798	axis specification	0.0124859	11	Ahi1/Apc/Axin2/Cited2/Hey2/Kdm6a/Lrp6/Nckap1/Pax6/Pgap1/Wnt7a
GO:1901699	cellular response to nitrogen compound	0.0125201	43	Akt3/Apc/Cacna2d1/Cdk5r1/Col1a1/Col4a1/Cpeb1/Foxo1/Gabpa/Ghr/Grb14/Grin2a/Gsk3b/Hnrnpk/Itpr1/Lmbrd1/Lrrk2/Lypd1/Map3k5/Mir346/Mir365-1/Nck1/Osbpl8/Pde3a/Pid1/Pik3r3/Plcb1/Prkcb/Prkn/Pten/Ptpn11/Rapgef2/Rock1/Rragc/Ryr2/Sesn1/Sik2/Slc8a1/Stat5a/Tbc1d4/Ubr2/Vwa2/Zeb1
GO:0071322	cellular response to carbohydrate stimulus	0.0126836	15	Efna5/Eny2/Epha5/Gpr39/Gpr68/Nrxn1/Plcb1/Ppp2ca/Prkaa2/Prkaca/Prkcb/Prkn/Ptprn2/Sox4/Zbtb20
GO:0043632	modification-dependent macromolecule catabolic process	0.0127115	40	Ankib1/Arih1/Ate1/Cd2ap/Clock/Cul1/Disc1/Fbxl17/Fbxl18/Fbxl7/Fbxo7/Gsk3b/Hecw2/Herc2/Hspa5/Klhl20/Lnx1/Lrrk2/Ltn1/Nedd4/Nrros/Otud7a/Pcbp2/Plk2/Prkn/Psmd14/Pten/Rnf121/Rnf133/Rnf217/Rpl5/Smurf2/Trim2/Ube2k/Ubqln1/Ubr2/Usp25/Usp47/Usp49/Vps36
GO:0007254	JNK cascade	0.012955	19	Dact1/Dtnbp1/Edar/Ephb1/Fgd4/Grik2/Hipk3/Lmnb1/Map3k5/Mapk10/Mink1/Pja2/Plcb1/Rap2a/Sh3rf3/Vangl2/Wnt16/Wnt7a/Zmynd11
GO:0031644	regulation of neurological system process	0.0130341	17	Ctss/Cux2/Grin2a/Gsk3b/Homer1/Lrrk2/Ncam1/Nlgn1/Nptxr/Nrxn1/Prkn/Pten/Reln/Shank2/Tbc1d24/Tmem108/Wnt7a
GO:0046328	regulation of JNK cascade	0.0130377	18	Dact1/Dtnbp1/Edar/Ephb1/Fgd4/Grik2/Hipk3/Lmnb1/Map3k5/Mink1/Pja2/Plcb1/Rap2a/Sh3rf3/Vangl2/Wnt16/Wnt7a/Zmynd11
GO:0010498	proteasomal protein catabolic process	0.0132471	33	Ankib1/Arih1/Ate1/Cd2ap/Clock/Cul1/Fam192a/Fbxl17/Fbxl18/Fbxl7/Gsk3b/Hecw2/Herc2/Hspa5/Klhl20/Lrrk2/Ltn1/Nedd4/Nrros/Pcbp2/Plk2/Prkaca/Prkn/Psmd14/Rnf121/Rnf217/Smurf2/Trim2/Ube2k/Ubqln1/Ubr2/Uggt1/Usp25
GO:0010876	lipid localization	0.0133824	29	Abca1/Abcd3/Abcg4/Acsl1/Atp11b/C1qtnf1/Crot/Fto/Hbp1/Hdlbp/Hilpda/Hnrnpk/Lrp6/Osbp2/Osbpl6/Osbpl8/Plekha3/Pnpla8/Pqlc1/Prelid3a/Ptpn11/Repin1/Slc25a17/Slco3a1/Stat5a/Stra6/Syt7/Tmem135/Tnfaip8l3
GO:0010766	negative regulation of sodium ion transport	0.013745	4	Hecw2/Nedd4/Stk39/Wnk2
GO:0034698	response to gonadotropin	0.013745	4	Efna5/Epha3/Epha5/Tgfbr3
GO:0098877	neurotransmitter receptor transport to plasma membrane	0.013745	4	Arhgap44/Grip2/Mapk10/Snap25
GO:1903540	establishment of protein localization to postsynaptic membrane	0.013745	4	Arhgap44/Grip2/Mapk10/Snap25
GO:0016079	synaptic vesicle exocytosis	0.0138884	15	Adora2b/Apba2/Braf/Dtnbp1/Erc1/Erc2/Gsk3b/Lrrk2/Nlgn1/Pclo/Prkcb/Snap25/Syt1/Syt7/Wnt7a
GO:0032869	cellular response to insulin stimulus	0.0139766	19	Akt3/Apc/Cpeb1/Foxo1/Grb14/Gsk3b/Hnrnpk/Lmbrd1/Nck1/Osbpl8/Pid1/Pik3r3/Plcb1/Prkcb/Pten/Ptpn11/Sik2/Tbc1d4/Vwa2
GO:0007163	establishment or maintenance of cell polarity	0.0141599	22	Apc/Clasp2/Cyth3/Dlg2/Ephb1/Exoc4/Gbf1/Gsk3b/Map2/Map4/Nckap1/Pard3b/Pax6/Prickle2/Rock1/Rufy3/Sdccag8/Spag5/Synj2bp/Ust/Vangl2/Wnt7a
GO:2000060	positive regulation of ubiquitin-dependent protein catabolic process	0.0142599	10	Ankib1/Arih1/Disc1/Gsk3b/Lrrk2/Plk2/Prkn/Pten/Rnf217/Ubqln1
GO:0098609	cell-cell adhesion	0.0142954	53	Adgrl3/Alcam/Ank3/C1qtnf1/Cd2ap/Cd83/Cdh13/Cdh2/Cdh20/Cdh26/Cdh8/Cdk5r1/Cited2/Clstn2/Dab1/Dlg2/Dscam/Efna5/Epha3/Flrt3/Igfbp2/Kirrel3/Lrp6/Lrrc4/Malt1/Mapk14/Mbp/Mink1/Ncam1/Nck1/Negr1/Nfkbid/Nlgn1/Nptn/Nrcam/Nrxn1/Pag1/Pkp4/Ptprd/Ptprm/Ptprt/Robo1/Rock1/Sdk1/Stat5a/Stxbp6/Swap70/Synj2bp/Tenm2/Tgfb2/Vcl/Zfp609/Zp3
GO:0033365	protein localization to organelle	0.0143864	55	Abra/Adam22/Ahi1/Apc/Arl5b/Bag4/Bnip3l/Cd2ap/Col1a1/Disc1/Dlg2/F2/Fbxo7/Gbf1/Gsk3b/Hnf4a/Hspa5/Immp2l/Ing1/Insig1/Kalrn/Kpna6/Lrrk2/Mapk14/March5/Mtch2/Nedd4/Nptxr/Nutf2/Osbpl8/Paqr3/Pax6/Pot1a/Ppp2ca/Ppp2r2b/Prkd1/Prkn/Pygo1/Rcc2/Ryr2/Sec16b/Sec63/Setd2/Spag5/Spcs2/Srp19/Srp72/Tapt1/Terf1/Tgfb2/Tor1aip2/Tram2/Ttbk2/Ttc21b/Vps36
GO:0007616	long-term memory	0.014685	6	Gria1/Lrrn4/Pja2/Reln/Snap25/Tacr1
GO:0048596	embryonic camera-type eye morphogenesis	0.014685	6	Cited2/Lrp6/Pax6/Prox1/Stra6/Zeb1
GO:0001667	ameboidal-type cell migration	0.0147714	35	Akt3/Bag4/Braf/Capn7/Cdh13/Clasp2/Gdnf/Lrp6/Mmrn2/Nckap1/Pax6/Pik3c2a/Pik3r3/Plk2/Prkd1/Prox1/Pten/Ptpn11/Ptprm/Ptprr/Rcc2/Robo1/Sema4f/Sema5a/Slc8a1/Smoc2/Smurf2/Srgap2/Stat5a/Strap/Synj2bp/Tacr1/Tgfb2/Tgfbr3/Wnt7a
GO:0120031	plasma membrane bounded cell projection assembly	0.014775	36	Ablim1/Ahi1/Apc/Asap1/Auts2/Bag4/Cdh13/Cfap298/Disc1/Dnm3/Dpysl3/Eps8/Fgd4/Gap43/Hdac4/Hnf4a/Ick/Iqcg/Lrguk/Lrrc6/Map4/Nck1/Nckap1/Nlgn1/Nrxn1/Rap2a/Rapgef2/Rcc2/Rock1/Sept7/Srgap2/Ssh2/Tapt1/Ttbk2/Vangl2/Vcl
GO:0071326	cellular response to monosaccharide stimulus	0.0148643	14	Efna5/Eny2/Epha5/Gpr39/Gpr68/Nrxn1/Plcb1/Ppp2ca/Prkaa2/Prkaca/Prkn/Ptprn2/Sox4/Zbtb20
GO:0034333	adherens junction assembly	0.0157038	11	Clasp2/Efna5/Epha3/Limch1/Peak1/Pten/Ptprj/Ptprk/Rcc2/Rock1/Vcl
GO:0051603	proteolysis involved in cellular protein catabolic process	0.0159171	45	Ankib1/Arih1/Ate1/Cd2ap/Clock/Ctsk/Ctss/Cul1/Disc1/Fam192a/Fbxl17/Fbxl18/Fbxl7/Fbxo7/Gsk3b/Hecw2/Herc2/Hspa5/Klhl20/Lnx1/Lrrk2/Ltn1/Nedd4/Nrros/Otud7a/Pcbp2/Plk2/Prkaca/Prkn/Psmd14/Pten/Rnf121/Rnf133/Rnf217/Rpl5/Smurf2/Trim2/Ube2k/Ubqln1/Ubr2/Uggt1/Usp25/Usp47/Usp49/Vps36
GO:0060485	mesenchyme development	0.0159723	26	Axin2/Cited2/Clasp2/Col1a1/Epha3/Exoc4/Gdnf/Gsk3b/Hey2/Ldlrad4/Lrp6/Nckap1/Nedd4/Nfatc1/Pax6/Ppp2ca/Pten/Robo1/Sema4f/Sema5a/Strap/Tgfb2/Tgfbr3/Usf3/Vangl2/Wnt16
GO:0006887	exocytosis	0.0159855	30	Adora2b/Apba2/Bloc1s6/Braf/Cacna1g/Clasp2/Dtnbp1/Erc1/Erc2/Exoc4/Exoc6/Exoc6b/Gsk3b/Lrrk2/Ncam1/Nlgn1/Nrxn1/Pclo/Pik3c2a/Prkcb/Prkn/Rab3c/Snap25/Stxbp6/Syt1/Syt7/Sytl2/Vps45/Wnt7a/Zp3
GO:0018958	phenol-containing compound metabolic process	0.0161062	10	Dio1/Dio2/Epas1/Grin2a/Npr1/Prkn/Rapgef2/Reln/Tgfb2/Tph1
GO:0031110	regulation of microtubule polymerization or depolymerization	0.0161062	10	Apc/Clasp2/Clip1/Dst/Map2/Pde4dip/Stmn2/Stmn4/Terf1/Ttbk2
GO:0046626	regulation of insulin receptor signaling pathway	0.0161667	9	Grb14/Lmbrd1/Nck1/Osbpl8/Pid1/Prkcb/Ptpn11/Sik2/Vwa2
GO:1990138	neuron projection extension	0.0162097	19	Auts2/Cdk5r1/Clasp2/Disc1/Dscam/Flrt3/Fxn/Gsk3b/Hnrnpk/Map2/Prkn/Raph1/Rtn4r/Rufy3/Sema4f/Sema5a/Syt1/Tmem108/Vcl
GO:0032970	regulation of actin filament-based process	0.0162575	33	Add1/Arhgap44/Bag4/Braf/Capza2/Cd2ap/Cdk5r1/Clasp2/Efna5/Epha3/Epha5/Eps8/Fchsd2/Fmn2/Frmd6/Jmy/Limch1/Nck1/Nckap1/Ppfia1/Prkn/Prox1/Rock1/Ryr2/Sema5a/Spire1/Sptan1/Ssh2/Swap70/Tacr1/Tgfb2/Vangl2/Vill
GO:0051291	protein heterooligomerization	0.0165627	15	Bag4/Braf/C1qtnf1/Cdh2/Col1a1/Kcnd2/Nlgn1/Nrxn1/Ppp2ca/Prkaa2/Rcc1/Sept7/Syt1/Tmcc1/Trps1
GO:0017156	calcium ion regulated exocytosis	0.0166062	17	Adora2b/Apba2/Braf/Cacna1g/Dtnbp1/Erc1/Erc2/Gsk3b/Lrrk2/Nlgn1/Pclo/Prkcb/Snap25/Syt1/Syt7/Wnt7a/Zp3
GO:1902803	regulation of synaptic vesicle transport	0.0167333	12	Adora2b/Apba2/Braf/Dtnbp1/Gsk3b/Lrrk2/Map2/Nlgn1/Prkcb/Syt1/Syt7/Wnt7a
GO:0048639	positive regulation of developmental growth	0.0170562	20	Disc1/Dscam/Efna5/Fxn/Ghr/Gsk3b/Hey2/Hnrnpk/Mapk14/Ncam1/Plcb1/Prkn/Prox1/Rufy3/Sema5a/Stat5a/Syt1/Tgfbr3/Zfpm2/Zp3
GO:1905114	cell surface receptor signaling pathway involved in cell-cell signaling	0.0171331	42	Apc/Axin2/Cdh2/Col1a1/Cpe/Cux2/Dact1/Disc1/Etv2/Fam53b/Foxo1/Fzd1/Gli2/Grik2/Grin2a/Gsk3b/Hbp1/Kdm6a/Leo1/Lgr4/Lrp6/Lrrk2/Mapk14/Nlgn1/Nrxn1/Prkaa2/Prkn/Pten/Pygo1/Reln/Ryr2/Scel/Sema5a/Shank2/Sox4/Tbc1d24/Tmem108/Usp47/Vangl2/Wnk2/Wnt16/Wnt7a
GO:1903421	regulation of synaptic vesicle recycling	0.0171835	5	Dnm3/Lrrk2/Nlgn1/Rock1/Syt7
GO:1904893	negative regulation of STAT cascade	0.0171835	5	Dab1/Hnf4a/Inpp5f/Ptprd/Ptprt
GO:0007044	cell-substrate junction assembly	0.0175286	11	Clasp2/Dst/Efna5/Epha3/Limch1/Peak1/Pten/Ptprj/Ptprk/Rcc2/Rock1
GO:0010717	regulation of epithelial to mesenchymal transition	0.0175286	11	Axin2/Clasp2/Col1a1/Epha3/Ldlrad4/Ppp2ca/Pten/Strap/Tgfb2/Tgfbr3/Usf3
GO:0060359	response to ammonium ion	0.0175286	11	Adgrl3/Cdk5r1/Gabpa/Homer1/Kalrn/Lrrk2/Lypd1/Ncam1/Plcb1/Ppp2r2a/Sdk1
GO:0010563	negative regulation of phosphorus metabolic process	0.0176892	43	Ankle2/Apc/Bag4/Csrnp3/Dact1/Dlg2/Dtnbp1/Dusp6/Fbxo7/Foxo1/Gpatch2/Gsk3b/Hdac4/Hipk3/Hnf4a/Inpp5f/Ldlrad4/Lrp6/Lrrk2/Mgat5/Mprip/Mtch2/Nck1/Paqr3/Pax6/Pid1/Ppp2ca/Prkn/Pten/Ptprj/Ptprr/Ptprt/Ranbp9/Rock1/Smyd3/Stk39/Strap/Swap70/Synj2bp/Sytl2/Tgfb2/Wnk2/Zmynd11
GO:0045936	negative regulation of phosphate metabolic process	0.0176892	43	Ankle2/Apc/Bag4/Csrnp3/Dact1/Dlg2/Dtnbp1/Dusp6/Fbxo7/Foxo1/Gpatch2/Gsk3b/Hdac4/Hipk3/Hnf4a/Inpp5f/Ldlrad4/Lrp6/Lrrk2/Mgat5/Mprip/Mtch2/Nck1/Paqr3/Pax6/Pid1/Ppp2ca/Prkn/Pten/Ptprj/Ptprr/Ptprt/Ranbp9/Rock1/Smyd3/Stk39/Strap/Swap70/Synj2bp/Sytl2/Tgfb2/Wnk2/Zmynd11
GO:0001964	startle response	0.0177808	6	Ctnna2/Grin2a/Npas3/Nrxn1/Prkn/Pten
GO:0120032	regulation of plasma membrane bounded cell projection assembly	0.0179518	17	Apc/Auts2/Dnm3/Dpysl3/Eps8/Gap43/Hdac4/Hnf4a/Map4/Nckap1/Nlgn1/Nrxn1/Rcc2/Sept7/Ssh2/Tapt1/Ttbk2
GO:0007264	small GTPase mediated signal transduction	0.0183687	39	Abca1/Abra/Als2/Arap3/Arhgap31/Arhgap42/Arhgap44/Arhgef12/Auts2/Cd2ap/Cdh13/Cdh2/Cyth3/Dab1/Dock4/Dock9/Eps8/Fgd4/Kalrn/Madd/Nckap1/Plk2/Prkd1/Psd3/Rab19/Rab1a/Rab3c/Ralgapa1/Ralgps1/Rap2a/Rapgef2/Reln/Robo1/Rock1/Rtn4r/Synj2bp/Tgfb2/Trio/Vangl2
GO:0021766	hippocampus development	0.0183883	9	Cdk5r1/Dlx1/Epha5/Gsk3b/Kirrel3/Prox1/Pten/Reln/Tmem108
GO:0033002	muscle cell proliferation	0.0184252	22	Apc/Arid2/Cdh13/Cited2/Ephb1/Foxp1/Gsk3b/Hdac4/Hey2/Jarid2/Kalrn/Map3k5/Mapk14/Meis1/Ncam1/Npr1/Npr3/Pten/Tacr1/Tgfb2/Tgfbr3/Zfpm2
GO:0048762	mesenchymal cell differentiation	0.0184252	22	Axin2/Cited2/Clasp2/Col1a1/Epha3/Gdnf/Gsk3b/Hey2/Ldlrad4/Lrp6/Nfatc1/Pax6/Ppp2ca/Pten/Sema4f/Sema5a/Strap/Tgfb2/Tgfbr3/Usf3/Vangl2/Wnt16
GO:0006614	SRP-dependent cotranslational protein targeting to membrane	0.0185688	4	Sec63/Srp19/Srp72/Tram2
GO:0043254	regulation of protein complex assembly	0.0188367	34	Add1/Apc/Asap1/Atf7ip/Atxn2/Bag4/Bcl2l11/Capza2/Clasp2/Clip1/Cnot6/Dact1/Eps8/Fchsd2/Fmn2/Gsk3b/Hey2/Insig1/Jmy/Ldlrad4/Map2/Ncam1/Nck1/Nckap1/Pan3/Pde4dip/Prkaa2/Ptpn11/Spire1/Sptan1/Stmn2/Stxbp6/Terf1/Vill
GO:0060491	regulation of cell projection assembly	0.0193799	17	Apc/Auts2/Dnm3/Dpysl3/Eps8/Gap43/Hdac4/Hnf4a/Map4/Nckap1/Nlgn1/Nrxn1/Rcc2/Sept7/Ssh2/Tapt1/Ttbk2
GO:0048675	axon extension	0.0194898	14	Auts2/Cdk5r1/Clasp2/Disc1/Dscam/Fxn/Gsk3b/Map2/Raph1/Rtn4r/Rufy3/Sema4f/Sema5a/Vcl
GO:1901888	regulation of cell junction assembly	0.0195067	11	Clasp2/Efna5/Epha3/Limch1/Peak1/Prkaca/Pten/Ptprj/Rapgef2/Rcc2/Rock1
GO:0007019	microtubule depolymerization	0.0199562	7	Apc/Clasp2/Map2/Nckap5/Stmn2/Stmn4/Ttbk2
GO:0007045	cell-substrate adherens junction assembly	0.0203217	10	Clasp2/Efna5/Epha3/Limch1/Peak1/Pten/Ptprj/Ptprk/Rcc2/Rock1
GO:0048041	focal adhesion assembly	0.0203217	10	Clasp2/Efna5/Epha3/Limch1/Peak1/Pten/Ptprj/Ptprk/Rcc2/Rock1
GO:0044257	cellular protein catabolic process	0.0205023	47	Ankib1/Arih1/Ate1/Bnip3l/Cd2ap/Clock/Ctsk/Ctss/Cul1/Dact1/Disc1/Fam192a/Fbxl17/Fbxl18/Fbxl7/Fbxo7/Gsk3b/Hecw2/Herc2/Hspa5/Klhl20/Lnx1/Lrrk2/Ltn1/Nedd4/Nrros/Otud7a/Pcbp2/Plk2/Prkaca/Prkn/Psmd14/Pten/Rnf121/Rnf133/Rnf217/Rpl5/Smurf2/Trim2/Ube2k/Ubqln1/Ubr2/Uggt1/Usp25/Usp47/Usp49/Vps36
GO:1904062	regulation of cation transmembrane transport	0.0205303	28	Ank3/Cacna2d1/Ctss/F2/Gnb5/Gpr39/Hecw2/Homer1/Kcnab1/Mink1/Nedd4/Nlgn1/Nrxn1/Oxsr1/Pik3c2a/Plcb1/Ppp2ca/Prkd1/Pten/Reln/Ryr2/Shank2/Slc8a1/Stk39/Tgfb2/Tmc1/Ubqln1/Wnk2
GO:1990778	protein localization to cell periphery	0.0206631	29	Adam22/Ank3/Arhgap44/Bag4/Cdh2/Clasp2/Clip1/Dlg2/Epha3/Fam126a/Grin2a/Grip2/Gsk3b/Kalrn/Lrp6/Lypd1/Mapk10/Nptxr/Nrxn1/Pid1/Ppfia1/Rab3c/Rap2a/Rapgef2/Rock1/Snap25/Sytl2/Tspan5/Ttc7b
GO:0045843	negative regulation of striated muscle tissue development	0.0208074	8	Apc/Cited2/Ephb1/Foxp1/Jarid2/Lrp6/Meis1/Pten
GO:0048488	synaptic vesicle endocytosis	0.0208074	8	Amph/Dnajc6/Dnm3/Lrrk2/Nlgn1/Rock1/Syt1/Syt7
GO:0140238	presynaptic endocytosis	0.0208074	8	Amph/Dnajc6/Dnm3/Lrrk2/Nlgn1/Rock1/Syt1/Syt7
GO:0060070	canonical Wnt signaling pathway	0.0209668	25	Apc/Axin2/Cdh2/Col1a1/Dact1/Disc1/Fam53b/Foxo1/Fzd1/Gsk3b/Kdm6a/Lgr4/Lrp6/Lrrk2/Mapk14/Prkn/Pten/Pygo1/Ryr2/Scel/Sema5a/Sox4/Usp47/Wnk2/Wnt7a
GO:0000245	spliceosomal complex assembly	0.021296	6	Celf2/Luc7l3/Ptbp2/Sf3b1/Srpk1/Srpk2
GO:0048048	embryonic eye morphogenesis	0.021296	6	Cited2/Lrp6/Pax6/Prox1/Stra6/Zeb1
GO:0007413	axonal fasciculation	0.0213796	5	Cdk5r1/Cntn2/Epha3/Ncam1/Sema5a
GO:0010737	protein kinase A signaling	0.0213796	5	Akap12/Lrrk2/Nrxn1/Pja2/Prkaca
GO:0021533	cell differentiation in hindbrain	0.0213796	5	Atxn2/Nrxn1/Prox1/Rora/Wnt7a
GO:0045956	positive regulation of calcium ion-dependent exocytosis	0.0213796	5	Cacna1g/Nlgn1/Syt1/Syt7/Zp3
GO:0060045	positive regulation of cardiac muscle cell proliferation	0.0213796	5	Hey2/Mapk14/Ncam1/Tgfbr3/Zfpm2
GO:0097107	postsynaptic density assembly	0.0213796	5	Nrxn1/Pten/Ptprd/Reln/Shank2
GO:0099010	modification of postsynaptic structure	0.0213796	5	Arhgap44/Ctnna2/Filip1/Gsk3b/Kalrn
GO:0106030	neuron projection fasciculation	0.0213796	5	Cdk5r1/Cntn2/Epha3/Ncam1/Sema5a
GO:1901380	negative regulation of potassium ion transmembrane transport	0.0213796	5	Ank3/Kcnab1/Oxsr1/Pten/Stk39
GO:0048193	Golgi vesicle transport	0.0216337	21	Ank3/Arfgap2/Copg2/Creb3l2/Cux2/Cyth3/Exoc4/Exoc6/Exoc6b/Gbf1/Igf2r/Insig1/Klhl20/Pgap1/Prkd1/Rab19/Rab1a/Sec16b/Spire1/Stx6/Stxbp6
GO:0000226	microtubule cytoskeleton organization	0.0220609	38	Apc/Cdk5r1/Clasp2/Clip1/Cntn2/Disc1/Dst/Dync1li2/Efhc1/Efna5/Epha3/Fmn2/Gsk3b/Iqcg/Katnal1/Lrguk/Lrrc6/Map2/Map4/Nckap5/Pard3b/Pax6/Pde4dip/Plk2/Ppp1r12a/Prkaa2/Rcc1/Sdccag8/Setd2/Sgo1/Spag5/Spire1/Srgap2/Ss18/Stmn2/Stmn4/Terf1/Ttbk2
GO:0030031	cell projection assembly	0.0224363	36	Ablim1/Ahi1/Apc/Asap1/Auts2/Bag4/Cdh13/Cfap298/Disc1/Dnm3/Dpysl3/Eps8/Fgd4/Gap43/Hdac4/Hnf4a/Ick/Iqcg/Lrguk/Lrrc6/Map4/Nck1/Nckap1/Nlgn1/Nrxn1/Rap2a/Rapgef2/Rcc2/Rock1/Sept7/Srgap2/Ssh2/Tapt1/Ttbk2/Vangl2/Vcl
GO:1903828	negative regulation of cellular protein localization	0.0224874	12	Astn2/Bag4/Gsk3b/Hnf4a/Insig1/Lrrk2/Lypd1/Pid1/Ppfia1/Ppp2ca/Terf1/Ttbk2
GO:0043161	proteasome-mediated ubiquitin-dependent protein catabolic process	0.0228088	28	Ankib1/Arih1/Cd2ap/Clock/Cul1/Fbxl17/Fbxl18/Fbxl7/Gsk3b/Hecw2/Herc2/Hspa5/Klhl20/Lrrk2/Ltn1/Nedd4/Nrros/Pcbp2/Plk2/Prkn/Psmd14/Rnf121/Rnf217/Smurf2/Trim2/Ube2k/Ubqln1/Ubr2
GO:0060560	developmental growth involved in morphogenesis	0.0231455	24	Auts2/Cdk5r1/Clasp2/Disc1/Dscam/Efna5/Flrt3/Fxn/Gsk3b/Hnrnpk/Lrp6/Map2/Prkn/Raph1/Robo1/Rtn4r/Rufy3/Sema4f/Sema5a/Sept7/Syt1/Tmem108/Vangl2/Vcl
GO:0007269	neurotransmitter secretion	0.0236375	18	Adora2b/Apba2/Braf/Dtnbp1/Erc1/Erc2/Gsk3b/Lrrk2/Nlgn1/Nrxn1/Pclo/Prkcb/Prkn/Ptprn2/Snap25/Syt1/Syt7/Wnt7a
GO:0099643	signal release from synapse	0.0236375	18	Adora2b/Apba2/Braf/Dtnbp1/Erc1/Erc2/Gsk3b/Lrrk2/Nlgn1/Nrxn1/Pclo/Prkcb/Prkn/Ptprn2/Snap25/Syt1/Syt7/Wnt7a
GO:0010171	body morphogenesis	0.0237603	8	Braf/Clasp2/Col1a1/Lrp6/Nckap1/Ptpn11/Stra6/Tgfb2
GO:0030858	positive regulation of epithelial cell differentiation	0.0237603	8	Add1/Ahi1/Apc/Atoh1/Etv2/Gdnf/Pax6/Vezf1
GO:0048635	negative regulation of muscle organ development	0.0237603	8	Apc/Cited2/Ephb1/Foxp1/Jarid2/Lrp6/Meis1/Pten
GO:1901862	negative regulation of muscle tissue development	0.0237603	8	Apc/Cited2/Ephb1/Foxp1/Jarid2/Lrp6/Meis1/Pten
GO:0120034	positive regulation of plasma membrane bounded cell projection assembly	0.0239506	11	Apc/Auts2/Dnm3/Dpysl3/Eps8/Hdac4/Nckap1/Nlgn1/Sept7/Tapt1/Ttbk2
GO:0003214	cardiac left ventricle morphogenesis	0.0243192	4	Cpe/Hey2/Ryr2/Tgfb2
GO:0006613	cotranslational protein targeting to membrane	0.0243192	4	Sec63/Srp19/Srp72/Tram2
GO:0010996	response to auditory stimulus	0.0243192	4	Nrxn1/Slc1a3/Stra6/Tacr1
GO:0021542	dentate gyrus development	0.0243192	4	Prox1/Pten/Reln/Tmem108
GO:0060123	regulation of growth hormone secretion	0.0243192	4	Kalrn/Madd/Mgea5/Ptpn11
GO:0070262	peptidyl-serine dephosphorylation	0.0243192	4	Nck1/Ppp2r2a/Ppp2r2b/Swap70
GO:0071625	vocalization behavior	0.0243192	4	Auts2/Foxp1/Nrxn1/Shank2
GO:0072578	neurotransmitter-gated ion channel clustering	0.0243192	4	Lhfpl4/Nlgn1/Nrxn1/Reln
GO:1905276	regulation of epithelial tube formation	0.0243192	4	Fzd1/Gdnf/Lrp6/Vangl2
GO:0001101	response to acid chemical	0.0245034	24	Abca1/Add1/Col1a1/Col4a1/Cpeb1/Epha3/Foxp1/Grin2a/Igf2r/Lrp6/Mir346/Mir365-1/Ncoa1/Pid1/Plcb1/Prkaa2/Prkn/Rragc/Sesn1/Slc1a3/Tacr1/Tgfbr3/Ubr2/Zeb1
GO:0032271	regulation of protein polymerization	0.0246049	19	Add1/Apc/Bag4/Capza2/Clasp2/Clip1/Eps8/Fchsd2/Fmn2/Jmy/Map2/Nck1/Nckap1/Pde4dip/Spire1/Sptan1/Stmn2/Terf1/Vill
GO:0016202	regulation of striated muscle tissue development	0.0246457	16	Apc/Cited2/Ephb1/Foxp1/Gsk3b/Hdac4/Hey2/Jarid2/Lrp6/Mapk14/Meis1/Ncam1/Pten/Rbfox1/Tgfbr3/Zfpm2
GO:1903827	regulation of cellular protein localization	0.0247833	39	Ank3/Apc/Arhgap44/Astn2/Bag4/Bnip3l/Cd2ap/Cdh2/Cdk5r1/Epha3/F2/Gbf1/Gsk3b/Hnf4a/Hnrnpk/Insig1/Kalrn/Lrrk2/Lypd1/Map2/Mapk14/Nrxn1/Nutf2/Pid1/Ppfia1/Ppp2ca/Prkaa2/Prkaca/Prkd1/Prkn/Ptpn11/Rufy3/Sec16b/Setd2/Stx6/Synj2bp/Terf1/Tgfb2/Ttbk2
GO:0018210	peptidyl-threonine modification	0.0250593	13	Akt3/Cdk5r1/Galnt16/Gsk3b/Hipk3/Lrrk2/Oxsr1/Prkaca/Prkcb/Prkd1/Stk39/Ttbk2/Ube2k
GO:0048640	negative regulation of developmental growth	0.0250593	13	Apc/Atxn2/Cdk5r1/Cited2/Foxp1/Fxn/Jarid2/Map2/Meis1/Pten/Rtn4r/Sema4f/Sema5a
GO:0071333	cellular response to glucose stimulus	0.0250593	13	Efna5/Eny2/Epha5/Gpr39/Gpr68/Nrxn1/Ppp2ca/Prkaa2/Prkaca/Prkn/Ptprn2/Sox4/Zbtb20
GO:0006605	protein targeting	0.0250998	22	Akap12/Ank3/Bag4/Bnip3l/Cdk5r1/Exoc4/Fbxo7/Immp2l/Lrrk2/Mgea5/Nedd4/Nlgn1/Pan3/Ppp2r2b/Sec63/Spcs2/Srp19/Srp72/Synj2bp/Tram2/Zdhhc11/Zdhhc14
GO:0071375	cellular response to peptide hormone stimulus	0.0250998	22	Akt3/Apc/Cpeb1/Foxo1/Ghr/Grb14/Gsk3b/Hnrnpk/Lmbrd1/Nck1/Osbpl8/Pid1/Pik3r3/Plcb1/Prkcb/Pten/Ptpn11/Rock1/Sik2/Stat5a/Tbc1d4/Vwa2
GO:0034101	erythrocyte homeostasis	0.0251283	14	Add1/Arid4a/Cebpg/Cited2/Epas1/Etv2/Exoc6/Kmt2e/Mapk14/Plcb1/Rcor1/Sfxn1/Stat5a/Tgfbr3
GO:0006984	ER-nucleus signaling pathway	0.0252524	6	Atg10/Bcl2l11/Gsk3b/Hspa5/Insig1/Nck1
GO:0032007	negative regulation of TOR signaling	0.0252524	6	Gsk3b/Minar1/Prkaa2/Sesn1/Sik2/Ubr2
GO:0043267	negative regulation of potassium ion transport	0.0252524	6	Ank3/Kcnab1/Oxsr1/Plcb4/Pten/Stk39
GO:0045071	negative regulation of viral genome replication	0.0252524	6	Ifitm7/Prkn/Prox1/Srpk1/Srpk2/Zfp809
GO:0001525	angiogenesis	0.0255019	40	Adam12/Add1/Adgrb3/Adora2b/Akt3/Cdh13/Col18a1/Col4a1/Col4a3/E2f7/Epas1/Ephb1/Ism1/Mapk14/Meis1/Minar1/Mmrn2/Nrxn1/Pik3c2a/Pik3r3/Plk2/Prkcb/Prkd1/Pten/Ptprm/Rbm15/Robo1/Rock1/Rora/Sema5a/Setd2/Smoc2/Srpk2/Synj2bp/Tcf4/Tgfb2/Tspan12/Vangl2/Vezf1/Wnt7a
GO:0031400	negative regulation of protein modification process	0.0258163	42	Apc/Dact1/Dtnbp1/Dusp6/Fbxo7/Foxo1/Gsk3b/Hipk3/Hnf4a/Inpp5f/Jarid2/Ldlrad4/Lrp6/Lrrk2/Mgat5/Mgea5/Minar1/Mprip/Nck1/Paqr3/Pax6/Pid1/Ppp2ca/Prkaa2/Prkn/Pten/Ptprj/Ptprr/Ptprt/Ranbp9/Rock1/Rpl5/Smyd3/Sox4/Stk39/Strap/Swap70/Synj2bp/Tbc1d24/U2af2/Wnk2/Zmynd11
GO:0070507	regulation of microtubule cytoskeleton organization	0.0259783	17	Apc/Cdk5r1/Clasp2/Clip1/Dst/Efna5/Epha3/Gsk3b/Map2/Pde4dip/Plk2/Prkaa2/Spag5/Stmn2/Stmn4/Terf1/Ttbk2
GO:0021799	cerebral cortex radially oriented cell migration	0.0261895	5	Cdk5r1/Dab1/Disc1/Reln/Srgap2
GO:0042417	dopamine metabolic process	0.0261895	5	Epas1/Grin2a/Npr1/Prkn/Tgfb2
GO:0045047	protein targeting to ER	0.0261895	5	Sec63/Spcs2/Srp19/Srp72/Tram2
GO:0098876	vesicle-mediated transport to the plasma membrane	0.026375	9	Ank3/Arhgap44/Exoc4/Exoc6/Exoc6b/Grip2/Mapk10/Snap25/Stxbp6
GO:1900076	regulation of cellular response to insulin stimulus	0.026375	9	Grb14/Lmbrd1/Nck1/Osbpl8/Pid1/Prkcb/Ptpn11/Sik2/Vwa2
GO:0031113	regulation of microtubule polymerization	0.0268096	7	Apc/Clasp2/Clip1/Map2/Pde4dip/Stmn2/Terf1
GO:0043200	response to amino acid	0.0270604	12	Col1a1/Col4a1/Cpeb1/Grin2a/Mir346/Mir365-1/Prkn/Rragc/Sesn1/Slc1a3/Ubr2/Zeb1
GO:0006898	receptor-mediated endocytosis	0.027069	20	Ahi1/Ap2b1/Atxn2/Cd2ap/Cntn2/Dnajc6/Dnm3/Dtnbp1/Gria1/Grk3/Hip1/Hnrnpk/Inpp5f/Lmbrd1/Lrp6/Nedd4/Reps1/Snap25/Synj2bp/Tmem108
GO:0000375	RNA splicing, via transesterification reactions	0.0271003	18	Celf2/Dbr1/Hnrnpc/Hnrnpk/Luc7l3/Ptbp2/Rbfox1/Rbm15/Rsrc1/Sf3b1/Sfpq/Srpk1/Srpk2/Strap/Txnl4a/U2af2/Usp49/Wtap
GO:0000377	RNA splicing, via transesterification reactions with bulged adenosine as nucleophile	0.0271003	18	Celf2/Dbr1/Hnrnpc/Hnrnpk/Luc7l3/Ptbp2/Rbfox1/Rbm15/Rsrc1/Sf3b1/Sfpq/Srpk1/Srpk2/Strap/Txnl4a/U2af2/Usp49/Wtap
GO:0000398	mRNA splicing, via spliceosome	0.0271003	18	Celf2/Dbr1/Hnrnpc/Hnrnpk/Luc7l3/Ptbp2/Rbfox1/Rbm15/Rsrc1/Sf3b1/Sfpq/Srpk1/Srpk2/Strap/Txnl4a/U2af2/Usp49/Wtap
GO:0060627	regulation of vesicle-mediated transport	0.0276406	40	Add1/Adora2b/Ahi1/Apba2/Arhgap44/Atxn2/Braf/Cacna1g/Cd2ap/Cdh13/Clasp2/Dnajc6/Dtnbp1/Eef2k/Epha3/Gsk3b/Hip1/Hnrnpk/Inpp5f/Insig1/Lrrk2/Map2/Mib1/Ncam1/Nedd4/Nlgn1/Pclo/Prkcb/Prkn/Pten/Ptprj/Rab3c/Rock1/Stxbp6/Synj2bp/Syt1/Syt7/Tbc1d4/Wnt7a/Zp3
GO:0097435	supramolecular fiber organization	0.0281402	48	Adamts2/Add1/Apc/Bag4/Braf/Cald1/Capza2/Cd2ap/Clasp2/Clip1/Col1a1/Col4a3/Dpysl3/Dst/Enah/Eps8/Fchsd2/Fmn2/Foxp1/Gas7/Hip1/Jmy/Katnal1/Limch1/Lmx1b/Map2/Nck1/Nckap1/Nckap5/Pde4dip/Ppfia1/Prkn/Prox1/Rock1/Rufy3/Sema5a/Spire1/Sptan1/Ssh2/Stmn2/Stmn4/Swap70/Tacr1/Terf1/Tgfb2/Thsd4/Ttbk2/Vill
GO:0051403	stress-activated MAPK cascade	0.0282361	22	Dact1/Dtnbp1/Edar/Ephb1/Fgd4/Foxo1/Grik2/Hipk3/Lmnb1/Map3k5/Mapk10/Mapk14/Mink1/Pja2/Plcb1/Rap2a/Sh3rf3/Tgfb2/Vangl2/Wnt16/Wnt7a/Zmynd11
GO:1901861	regulation of muscle tissue development	0.0285441	16	Apc/Cited2/Ephb1/Foxp1/Gsk3b/Hdac4/Hey2/Jarid2/Lrp6/Mapk14/Meis1/Ncam1/Pten/Rbfox1/Tgfbr3/Zfpm2
GO:0032872	regulation of stress-activated MAPK cascade	0.0288023	20	Dact1/Dtnbp1/Edar/Ephb1/Fgd4/Foxo1/Grik2/Hipk3/Lmnb1/Map3k5/Mink1/Pja2/Plcb1/Rap2a/Sh3rf3/Tgfb2/Vangl2/Wnt16/Wnt7a/Zmynd11
GO:0070302	regulation of stress-activated protein kinase signaling cascade	0.0288023	20	Dact1/Dtnbp1/Edar/Ephb1/Fgd4/Foxo1/Grik2/Hipk3/Lmnb1/Map3k5/Mink1/Pja2/Plcb1/Rap2a/Sh3rf3/Tgfb2/Vangl2/Wnt16/Wnt7a/Zmynd11
GO:0031098	stress-activated protein kinase signaling cascade	0.0289472	24	Dact1/Dtnbp1/Edar/Ephb1/Fgd4/Foxo1/Grik2/Hipk3/Lmnb1/Map3k5/Mapk10/Mapk14/Mink1/Oxsr1/Pja2/Plcb1/Rap2a/Sh3rf3/Stk39/Tgfb2/Vangl2/Wnt16/Wnt7a/Zmynd11
GO:0071230	cellular response to amino acid stimulus	0.0290896	11	Col1a1/Col4a1/Cpeb1/Grin2a/Mir346/Mir365-1/Prkn/Rragc/Sesn1/Ubr2/Zeb1
GO:2000300	regulation of synaptic vesicle exocytosis	0.0290896	11	Adora2b/Apba2/Braf/Dtnbp1/Gsk3b/Lrrk2/Nlgn1/Prkcb/Syt1/Syt7/Wnt7a
GO:0030856	regulation of epithelial cell differentiation	0.0291061	15	Add1/Ahi1/Apc/Atoh1/Clock/Etv2/Foxp1/Gdnf/Hey2/Pax6/Rock1/Stat5a/Tgfb2/Vezf1/Zeb1
GO:0043279	response to alkaloid	0.0295102	9	Adgrl3/Homer1/Kalrn/Ncam1/Ppp2r2a/Prkaa2/Ryr2/Sdk1/Slc8a1
GO:0071331	cellular response to hexose stimulus	0.0296914	13	Efna5/Eny2/Epha5/Gpr39/Gpr68/Nrxn1/Ppp2ca/Prkaa2/Prkaca/Prkn/Ptprn2/Sox4/Zbtb20
GO:0051258	protein polymerization	0.0299117	22	Add1/Apc/Bag4/Capza2/Clasp2/Clip1/Eps8/Fchsd2/Fmn2/Gas7/Jmy/Map2/Nck1/Nckap1/Pde4dip/Prkn/Spire1/Sptan1/Stmn2/Terf1/Ube2k/Vill
GO:0016197	endosomal transport	0.0306568	16	Abca1/Als2/Arhgap44/Dennd1b/Erc1/Gbf1/Grip2/Heatr5a/Inpp5f/Lrrk2/Lyst/Pqlc1/Rab11fip4/Snap25/Stx6/Vps36
GO:0048634	regulation of muscle organ development	0.0306568	16	Apc/Cited2/Ephb1/Foxp1/Gsk3b/Hdac4/Hey2/Jarid2/Lrp6/Mapk14/Meis1/Ncam1/Pten/Rbfox1/Tgfbr3/Zfpm2
GO:0021517	ventral spinal cord development	0.030772	7	Dab1/Dbx1/Foxp1/Gli2/Pax6/Reln/Sox4
GO:0003215	cardiac right ventricle morphogenesis	0.0310304	4	Hey2/Sox4/Tgfb2/Zfpm2
GO:0048490	anterograde synaptic vesicle transport	0.0310304	4	Bloc1s6/Dtnbp1/Madd/Map2
GO:0099514	synaptic vesicle cytoskeletal transport	0.0310304	4	Bloc1s6/Dtnbp1/Madd/Map2
GO:0099517	synaptic vesicle transport along microtubule	0.0310304	4	Bloc1s6/Dtnbp1/Madd/Map2
GO:1900242	regulation of synaptic vesicle endocytosis	0.0310304	4	Lrrk2/Nlgn1/Rock1/Syt7
GO:0003206	cardiac chamber morphogenesis	0.0313526	15	Cited2/Cpe/Fzd1/Hey2/Lrp6/Nfatc1/Prox1/Rbm15/Robo1/Ryr2/Sox4/Tgfb2/Tgfbr3/Vangl2/Zfpm2
GO:0007026	negative regulation of microtubule depolymerization	0.0316382	5	Apc/Clasp2/Map2/Stmn2/Ttbk2
GO:0099563	modification of synaptic structure	0.0316382	5	Arhgap44/Ctnna2/Filip1/Gsk3b/Kalrn
GO:0007613	memory	0.0318951	14	Cux2/Gria1/Grin2a/Kalrn/Lmx1b/Lrrn4/Pja2/Plcb1/Plk2/Pten/Reln/Shank2/Snap25/Tacr1
GO:0090066	regulation of anatomical structure size	0.0319413	43	Add1/Adora2b/Akt3/Arhgap42/Bag4/Cacna1g/Capza2/Cdk5r1/Clasp2/Cntn2/Disc1/Dock4/Dscam/Edn2/Efna5/Eps8/Fchsd2/Fmn2/Fxn/Grip2/Gsk3b/Jmy/Lrrk2/Map2/Nck1/Nckap1/Npr1/Pten/Ptprm/Rtn4r/Rufy3/Sema4f/Sema5a/Slc12a8/Slc8a1/Spire1/Sptan1/Ssh2/Swap70/Tacr1/Tgfbr3/Vill/Wnt7a
GO:0017158	regulation of calcium ion-dependent exocytosis	0.0322276	13	Adora2b/Apba2/Braf/Cacna1g/Dtnbp1/Gsk3b/Lrrk2/Nlgn1/Prkcb/Syt1/Syt7/Wnt7a/Zp3
GO:0016050	vesicle organization	0.0325181	20	Abca1/Als2/Arfgap2/Bloc1s6/Cd2ap/Dnm3/Dtnbp1/Gbf1/Insig1/Lyst/Prkn/Rab1a/Sec16b/Snap25/Stx6/Stxbp6/Syt1/Syt7/Tbc1d4/Tbpl1
GO:0034329	cell junction assembly	0.0325181	20	Cdh13/Cdh2/Cdh20/Cdh26/Cdh8/Clasp2/Dst/Efna5/Epha3/Limch1/Peak1/Pkp4/Prkaca/Pten/Ptprj/Ptprk/Rapgef2/Rcc2/Rock1/Vcl
GO:0032006	regulation of TOR signaling	0.032897	9	Akt3/Gsk3b/Minar1/Prkaa2/Reln/Rragc/Sesn1/Sik2/Ubr2
GO:0051881	regulation of mitochondrial membrane potential	0.032897	9	Bnip3l/Gsk3b/Lrrk2/Mgea5/Mtch2/Ndufs1/Pid1/Prkn/Tmem135
GO:0032412	regulation of ion transmembrane transporter activity	0.03307	21	Ank3/Cacna2d1/Ctss/Gnb5/Hecw2/Homer1/Kcnab1/Mink1/Nedd4/Nlgn1/Nrxn1/Oxsr1/Plcb1/Ppp2ca/Pten/Reln/Ryr2/Shank2/Stk39/Ubqln1/Wnk2
GO:0044057	regulation of system process	0.033129	45	Adora2b/Arhgap42/C1qtnf1/Cacna1g/Cacna2d1/Cald1/Corin/Ctss/Cux2/Dock4/Edn2/Epas1/Foxo1/Foxp1/Fto/Gpr39/Grin2a/Gsk3b/Hdac4/Hey2/Homer1/Inha/Jarid2/Lrrk2/Madd/Mgea5/Ncam1/Nfatc1/Nlgn1/Nptxr/Nrxn1/Prkn/Pten/Ptpn11/Reln/Rock1/Ryr2/Shank2/Slc8a1/Stk39/Tacr1/Tbc1d24/Tgfb2/Tmem108/Wnt7a
GO:0110053	regulation of actin filament organization	0.033487	22	Add1/Bag4/Braf/Capza2/Clasp2/Eps8/Fchsd2/Fmn2/Jmy/Limch1/Nck1/Nckap1/Ppfia1/Prkn/Rock1/Sema5a/Spire1/Sptan1/Ssh2/Swap70/Tacr1/Vill
GO:0050806	positive regulation of synaptic transmission	0.0337855	23	Braf/Clstn2/Cux2/Dtnbp1/Gria1/Grik2/Grin2a/Gsk3b/Hnrnpk/Kalrn/Nlgn1/Nrxn1/Plk2/Pten/Reln/Shank2/Slc1a3/Snap25/Syt1/Syt7/Tacr1/Tbc1d24/Wnt7a
GO:0006869	lipid transport	0.0340834	25	Abca1/Abcd3/Abcg4/Acsl1/Atp11b/C1qtnf1/Crot/Hbp1/Hdlbp/Hnrnpk/Lrp6/Osbp2/Osbpl6/Osbpl8/Plekha3/Pnpla8/Pqlc1/Prelid3a/Ptpn11/Repin1/Slc25a17/Slco3a1/Stra6/Syt7/Tnfaip8l3
GO:0040008	regulation of growth	0.0341133	52	Ahi1/Apbb2/Apc/Atxn2/Bcl2l11/Cdk5r1/Cited2/Clasp2/Crlf3/Disc1/Dscam/Dusp6/Efna5/F2/Foxp1/Fto/Fxn/Gap43/Ghr/Gng4/Gsk3b/Hey2/Hnf4a/Hnrnpk/Igfbp2/Jarid2/Map2/Mapk14/Meis1/Minar1/Morf4l1/Ncam1/Plcb1/Prkcb/Prkn/Prox1/Pten/Ptpn11/Ptprj/Rtn4r/Rufy3/Sema4f/Sema5a/Sertad2/Sesn1/Stat5a/Syt1/Tgfb2/Tgfbr3/Usp47/Zfpm2/Zp3
GO:0023061	signal release	0.034148	39	Adora2b/Apba2/Braf/C1qtnf1/Clock/Dio2/Dtnbp1/Edn2/Efna5/Eny2/Epha5/Erc1/Erc2/Gpr39/Gpr68/Gsk3b/Hnf4a/Inha/Kalrn/Lrrk2/Madd/Mcu/Mgea5/Nlgn1/Nrxn1/Pax6/Pclo/Pfkm/Prkcb/Prkn/Ptpn11/Ptprn2/Rab1a/Snap25/Sox4/Syt1/Syt7/Tacr1/Wnt7a
GO:0036465	synaptic vesicle recycling	0.0343552	8	Amph/Dnajc6/Dnm3/Lrrk2/Nlgn1/Rock1/Syt1/Syt7
GO:0000266	mitochondrial fission	0.034564	6	March5/Mtch2/Ppp2r2b/Prkn/Slc25a46/Tmem135
GO:0007157	heterophilic cell-cell adhesion via plasma membrane cell adhesion molecules	0.034564	6	Alcam/Cdh2/Nlgn1/Nrxn1/Ptprd/Tenm2
GO:0099054	presynapse assembly	0.034564	6	Fzd1/Nlgn1/Nrxn1/Pten/Ptprd/Wnt7a
GO:2001023	regulation of response to drug	0.0349739	11	Dtnbp1/Fbxo7/Foxp1/Gdnf/Lrrk2/Ncoa1/Prkcb/Ptpn11/Stk39/Syt1/Syt7
GO:0006900	vesicle budding from membrane	0.0351093	7	Arfgap2/Dnm3/Gbf1/Insig1/Prkn/Rab1a/Sec16b
GO:0042551	neuron maturation	0.0351093	7	Adgrb3/Cntn2/Dlg2/Gsk3b/Lrrk2/Nrcam/Nrxn1
GO:2001222	regulation of neuron migration	0.0351093	7	Gsk3b/Pax6/Rapgef2/Reln/Srgap2/Tbc1d24/Zfp609
GO:0010508	positive regulation of autophagy	0.0351353	12	Bcl2l11/Bnip3l/Fbxo7/Foxo1/Gsk3b/Lrrk2/Plk2/Prkaa2/Prkd1/Prkn/Rock1/Sesn1
GO:0018107	peptidyl-threonine phosphorylation	0.0351353	12	Akt3/Cdk5r1/Gsk3b/Hipk3/Lrrk2/Oxsr1/Prkaca/Prkcb/Prkd1/Stk39/Ttbk2/Ube2k
GO:0032386	regulation of intracellular transport	0.035648	33	Adora2b/Ank3/Apba2/Arhgap44/Bag4/Bnip3l/Braf/Cdk5r1/Dtnbp1/Eipr1/Gsk3b/Hnf4a/Inpp5f/Insig1/Lmx1b/Lrrk2/Map2/Mapk14/Nlgn1/Nutf2/Ppp1r12a/Ppp2ca/Prkaca/Prkcb/Prkd1/Ptpn11/Rufy3/Sec16b/Setd2/Spag5/Syt1/Syt7/Wnt7a
GO:0042391	regulation of membrane potential	0.035648	33	Ank3/Bnip3l/Cacna1g/Cacna2d1/Cux2/Foxp1/Gpr39/Gria1/Grik2/Grin2a/Gsk3b/Kcnd2/Kcnu1/Lrrk2/Mgea5/Mtch2/Ndufs1/Nlgn1/Nrcam/Nrxn1/Pid1/Prkn/Pten/Reln/Ryr2/Scn2a/Shank2/Slc8a1/Tacr1/Tbc1d24/Tmem108/Tmem135/Wnt7a
GO:0010810	regulation of cell-substrate adhesion	0.0359569	19	Braf/Cdh13/Clasp2/Col1a1/Disc1/Efna5/Epha3/Gsk3b/Limch1/Mink1/Mmrn2/Peak1/Pten/Ptprj/Rcc2/Rock1/Smoc2/Utrn/Vit
GO:0033157	regulation of intracellular protein transport	0.0374136	18	Ank3/Arhgap44/Bag4/Bnip3l/Cdk5r1/Gsk3b/Hnf4a/Insig1/Lrrk2/Mapk14/Nutf2/Ppp2ca/Prkaca/Prkd1/Ptpn11/Rufy3/Sec16b/Setd2
GO:0009953	dorsal/ventral pattern formation	0.0377342	10	Apc/Axin2/Dbx1/Gli2/Lmx1b/Lrp6/Pax6/Prkaca/Ttc21b/Wnt7a
GO:0003209	cardiac atrium morphogenesis	0.0377452	5	Hey2/Lrp6/Prox1/Sox4/Tgfb2
GO:0030810	positive regulation of nucleotide biosynthetic process	0.0377452	5	Adora2b/Pid1/Prkaa2/Prkn/Zbtb20
GO:0031114	regulation of microtubule depolymerization	0.0377452	5	Apc/Clasp2/Map2/Stmn2/Ttbk2
GO:0048194	Golgi vesicle budding	0.0377452	5	Arfgap2/Gbf1/Insig1/Rab1a/Sec16b
GO:1900373	positive regulation of purine nucleotide biosynthetic process	0.0377452	5	Adora2b/Pid1/Prkaa2/Prkn/Zbtb20
GO:1905314	semi-lunar valve development	0.0377452	5	Hey2/Nfatc1/Robo1/Stra6/Tgfb2
GO:0016525	negative regulation of angiogenesis	0.0382101	11	Adgrb3/Col4a3/Ism1/Minar1/Mmrn2/Plk2/Ptprm/Rock1/Synj2bp/Tcf4/Tgfb2
GO:0031109	microtubule polymerization or depolymerization	0.0382101	11	Apc/Clasp2/Clip1/Dst/Map2/Nckap5/Pde4dip/Stmn2/Stmn4/Terf1/Ttbk2
GO:0003170	heart valve development	0.0385002	8	Hey2/Matr3/Nfatc1/Robo1/Sox4/Stra6/Tgfb2/Zfpm2
GO:0032436	positive regulation of proteasomal ubiquitin-dependent protein catabolic process	0.0385002	8	Ankib1/Arih1/Gsk3b/Lrrk2/Plk2/Prkn/Rnf217/Ubqln1
GO:0043525	positive regulation of neuron apoptotic process	0.0385002	8	Bcl2l11/Cdk5r1/Grik2/Gsk3b/Hdac4/Ppp2r2b/Srpk2/Tgfb2
GO:0010738	regulation of protein kinase A signaling	0.038723	4	Akap12/Lrrk2/Nrxn1/Pja2
GO:0090128	regulation of synapse maturation	0.038723	4	Disc1/Hnrnpk/Nrxn1/Reln
GO:0099150	regulation of postsynaptic specialization assembly	0.038723	4	Gap43/Nptxr/Nrxn1/Ptprd
GO:0150052	regulation of postsynapse assembly	0.038723	4	Gap43/Nptxr/Nrxn1/Ptprd
GO:0006260	DNA replication	0.0388521	15	Ankrd17/Atf1/Dtd1/E2f7/Esco1/Gli2/Helb/Msh3/Nfia/Orc3/Orc4/Poll/Repin1/Rmi2/Terf1
GO:0022898	regulation of transmembrane transporter activity	0.039161	21	Ank3/Cacna2d1/Ctss/Gnb5/Hecw2/Homer1/Kcnab1/Mink1/Nedd4/Nlgn1/Nrxn1/Oxsr1/Plcb1/Ppp2ca/Pten/Reln/Ryr2/Shank2/Stk39/Ubqln1/Wnk2
GO:0034330	cell junction organization	0.0395926	23	Add1/Cdh13/Cdh2/Cdh20/Cdh26/Cdh8/Clasp2/Dst/Efna5/Epha3/Hnf4a/Limch1/Peak1/Pkp4/Prkaca/Pten/Ptprj/Ptprk/Rapgef2/Rcc2/Rock1/Tgfb2/Vcl
GO:0043271	negative regulation of ion transport	0.0398986	14	Ank3/Gnb5/Hecw2/Kcnab1/Nedd4/Oxsr1/Pik3c2a/Plcb4/Ppp2ca/Pten/Stk39/Tgfb2/Ubqln1/Wnk2
GO:0090630	activation of GTPase activity	0.0404568	9	Arhgap42/Rabgap1/Rcc2/Tbc1d1/Tbc1d13/Tbc1d22a/Tbc1d4/Tbc1d9b/Usp6nl
GO:0007265	Ras protein signal transduction	0.0409347	32	Abca1/Abra/Als2/Arap3/Arhgap42/Arhgap44/Arhgef12/Auts2/Cdh13/Cdh2/Cyth3/Eps8/Fgd4/Kalrn/Madd/Nckap1/Plk2/Prkd1/Psd3/Rab19/Rab1a/Rab3c/Ralgps1/Rap2a/Rapgef2/Robo1/Rock1/Rtn4r/Synj2bp/Tgfb2/Trio/Vangl2
GO:0010256	endomembrane system organization	0.0411739	27	Abca1/Als2/Ank3/Ankle2/Asap1/Atl2/Clasp2/Dtnbp1/Gbf1/Gorasp2/Lrrk2/Lyst/Pde4dip/Prkd1/Prkn/Pten/Rab1a/Sec16b/Stx6/Syt7/Tbpl1/Tgfb2/Tmcc1/Tmem170/Tor1aip2/Tram2/Usp6nl
GO:0003151	outflow tract morphogenesis	0.0414079	10	Cited2/Fzd1/Hey2/Lrp6/Nedd4/Robo1/Tgfb2/Tgfbr3/Vangl2/Zfpm2
GO:1903052	positive regulation of proteolysis involved in cellular protein catabolic process	0.0414079	10	Ankib1/Arih1/Disc1/Gsk3b/Lrrk2/Plk2/Prkn/Pten/Rnf217/Ubqln1
GO:0003007	heart morphogenesis	0.0416832	23	Ahi1/Arid2/Axin2/Cited2/Cpe/Fzd1/Hey2/Kdm6a/Lrp6/Mib1/Nedd4/Nfatc1/Prox1/Rbm15/Robo1/Ryr2/Slc8a1/Sox4/Tgfb2/Tgfbr3/Vangl2/Wnt16/Zfpm2
GO:1901653	cellular response to peptide	0.0416832	23	Akt3/Apc/Cacna2d1/Cpeb1/Foxo1/Ghr/Grb14/Gsk3b/Hnrnpk/Lmbrd1/Nck1/Osbpl8/Pid1/Pik3r3/Plcb1/Prkcb/Pten/Ptpn11/Rock1/Sik2/Stat5a/Tbc1d4/Vwa2
GO:0007160	cell-matrix adhesion	0.042254	18	Bcl2l11/Cdh13/Clasp2/Cntn2/Disc1/Efna5/Epha3/Gsk3b/Limch1/Mink1/Peak1/Pten/Ptprj/Ptprk/Rcc2/Rock1/Utrn/Vwa2
GO:0050771	negative regulation of axonogenesis	0.0429669	8	Cdk5r1/Dab1/Map2/Pten/Rtn4r/Rufy3/Sema4f/Sema5a
GO:0045732	positive regulation of protein catabolic process	0.0429778	16	Ankib1/Apc/Arih1/Dact1/Disc1/Foxo1/Gsk3b/Hecw2/Lrrk2/Nedd4/Plk2/Prkn/Pten/Rnf217/Smurf2/Ubqln1
GO:1903050	regulation of proteolysis involved in cellular protein catabolic process	0.0429778	16	Ankib1/Arih1/Disc1/Fam192a/Gsk3b/Lrrk2/Plk2/Prkaca/Prkn/Psmd14/Pten/Rnf217/Rpl5/Ube2k/Ubqln1/Usp25
GO:0010631	epithelial cell migration	0.0437901	24	Akt3/Capn7/Cdh13/Clasp2/Mmrn2/Pik3c2a/Pik3r3/Plk2/Prkd1/Prox1/Pten/Ptpn11/Ptprm/Ptprr/Robo1/Sema5a/Smoc2/Stat5a/Strap/Synj2bp/Tacr1/Tgfb2/Tgfbr3/Wnt7a
GO:0045862	positive regulation of proteolysis	0.0437901	24	Ankib1/Arih1/Bcl2l11/Cntn2/Col4a3/Disc1/Gsk3b/Hip1/Lrrk2/Map3k5/Mapk14/Mbp/Mgea5/Mtch2/Nek5/Plk2/Ppp2ca/Prkn/Pten/Rnf217/Robo1/Spon1/St18/Ubqln1
GO:0030072	peptide hormone secretion	0.0438148	22	Clock/Dio2/Efna5/Eny2/Epha5/Gpr39/Gpr68/Hnf4a/Kalrn/Madd/Mcu/Mgea5/Nrxn1/Pax6/Pclo/Pfkm/Prkn/Ptpn11/Ptprn2/Rab1a/Sox4/Syt7
GO:0051056	regulation of small GTPase mediated signal transduction	0.043854	23	Abca1/Abra/Als2/Arap3/Arhgap42/Arhgap44/Arhgef12/Auts2/Cd2ap/Cdh2/Cyth3/Eps8/Fgd4/Kalrn/Madd/Psd3/Ralgapa1/Ralgps1/Reln/Robo1/Rtn4r/Tgfb2/Trio
GO:1902904	negative regulation of supramolecular fiber organization	0.043941	13	Add1/Apc/Capza2/Clasp2/Eps8/Map2/Ppfia1/Prkn/Sptan1/Stmn2/Swap70/Ttbk2/Vill
GO:1902115	regulation of organelle assembly	0.0440364	17	Asap1/Atxn2/Cnot6/Gap43/Lrrk2/Map4/Nptxr/Nrxn1/Pan3/Plk2/Prkaa2/Prox1/Ptprd/Sept7/Spag5/Tapt1/Ttbk2
GO:0009950	dorsal/ventral axis specification	0.0443352	3	Axin2/Lrp6/Pax6
GO:0010818	T cell chemotaxis	0.0443352	3	Gpr183/Oxsr1/Stk39
GO:0014824	artery smooth muscle contraction	0.0443352	3	Cacna1g/Edn2/Grip2
GO:0022403	cell cycle phase	0.0443352	3	Mei1/Nfatc1/Terf1
GO:0032486	Rap protein signal transduction	0.0443352	3	Plk2/Rap2a/Rapgef2
GO:0036314	response to sterol	0.0443352	3	Insig1/Lrp6/Rora
GO:0038065	collagen-activated signaling pathway	0.0443352	3	Col1a1/Col4a1/Col4a3
GO:0090129	positive regulation of synapse maturation	0.0443352	3	Hnrnpk/Nrxn1/Reln
GO:0098598	learned vocalization behavior or vocal learning	0.0443352	3	Nrxn1/Pax6/Stra6
GO:0099171	presynaptic modulation of chemical synaptic transmission	0.0443352	3	Prkcb/Syt1/Syt7
GO:2000311	regulation of AMPA receptor activity	0.0445244	5	Mink1/Nlgn1/Nrxn1/Reln/Shank2
GO:0010923	negative regulation of phosphatase activity	0.0446442	9	Bag4/Csrnp3/Dlg2/Gpatch2/Mgat5/Mprip/Rock1/Sytl2/Tgfb2
GO:0071466	cellular response to xenobiotic stimulus	0.0446442	9	Acsl1/Gdnf/Ghr/Hnf4a/Rora/Ryr2/Slc8a1/Smyd3/Stat5a
GO:0051495	positive regulation of cytoskeleton organization	0.0448368	18	Apc/Bag4/Braf/Clip1/Fmn2/Jmy/Limch1/Nck1/Nckap1/Pde4dip/Prox1/Sema5a/Spag5/Spire1/Stmn2/Swap70/Tacr1/Terf1
GO:0030834	regulation of actin filament depolymerization	0.0449523	7	Add1/Capza2/Eps8/Sema5a/Sptan1/Swap70/Vill
GO:1903364	positive regulation of cellular protein catabolic process	0.045297	11	Ankib1/Arih1/Dact1/Disc1/Gsk3b/Lrrk2/Plk2/Prkn/Pten/Rnf217/Ubqln1
GO:0035305	negative regulation of dephosphorylation	0.0453189	10	Bag4/Csrnp3/Dlg2/Gpatch2/Mgat5/Mprip/Rock1/Swap70/Sytl2/Tgfb2
GO:0090263	positive regulation of canonical Wnt signaling pathway	0.0453189	10	Col1a1/Dact1/Fam53b/Lgr4/Lrrk2/Scel/Sema5a/Sox4/Usp47/Wnk2
GO:0031076	embryonic camera-type eye development	0.0458398	6	Cited2/Lrp6/Pax6/Prox1/Stra6/Zeb1
GO:0047496	vesicle transport along microtubule	0.0458398	6	Bloc1s6/Dtnbp1/Dync1i1/Madd/Map2/Rab1a
GO:0060323	head morphogenesis	0.0458398	6	Braf/Col1a1/Lrp6/Ptpn11/Stra6/Tgfb2
GO:2000649	regulation of sodium ion transmembrane transporter activity	0.0458398	6	Ank3/Hecw2/Nedd4/Plcb1/Stk39/Wnk2
GO:0051656	establishment of organelle localization	0.0459353	35	Adora2b/Ahi1/Apba2/Arfgap2/Bloc1s6/Braf/Clasp2/Copg2/Dnm3/Dtnbp1/Dync1i1/Eipr1/Erc1/Erc2/Fmn2/Gbf1/Gsk3b/Lrrk2/Madd/Map2/Map4/Mei1/Nlgn1/Pax6/Pclo/Prkcb/Rab1a/Sec16b/Snap25/Spag5/Spire1/Syt1/Syt7/Terf1/Wnt7a
GO:0090132	epithelium migration	0.0459786	24	Akt3/Capn7/Cdh13/Clasp2/Mmrn2/Pik3c2a/Pik3r3/Plk2/Prkd1/Prox1/Pten/Ptpn11/Ptprm/Ptprr/Robo1/Sema5a/Smoc2/Stat5a/Strap/Synj2bp/Tacr1/Tgfb2/Tgfbr3/Wnt7a
GO:0007018	microtubule-based movement	0.0460395	21	Bloc1s6/Cfap298/Copg2/Dlg2/Dst/Dtnbp1/Dync1i1/Dync1li2/Fmn2/Ick/Kif13b/Kif21a/Klc1/Lrrc6/Madd/Map2/Map4/Rab1a/Sfpq/Tmem108/Ttc21b
GO:0034599	cellular response to oxidative stress	0.0461321	22	Chd6/Epas1/Etv5/Fbxo7/Foxo1/Foxp1/Fut8/Fxn/Fzd1/Lrrk2/Map3k5/Msrb3/Oser1/Prkaa2/Prkd1/Prkn/Ptprk/Sfpq/Slc8a1/Tbc1d24/Ubqln1/Wnt16
GO:0051051	negative regulation of transport	0.0468949	36	Ahi1/Ank3/Atxn2/Bag4/Braf/Edn2/Eny2/Epha3/Gnb5/Gpr39/Hbp1/Hecw2/Hnf4a/Inha/Insig1/Kalrn/Kcnab1/Lgr4/Lmbrd1/Lrrk2/Madd/Nedd4/Oxsr1/Pid1/Pik3c2a/Plcb4/Ppp2ca/Prkcb/Prkn/Pten/Ptpn11/Stk39/Tbc1d4/Tgfb2/Ubqln1/Wnk2
GO:0010842	retina layer formation	0.0474047	4	Ahi1/Ptprm/Sdk1/Tspan12
GO:0061003	positive regulation of dendritic spine morphogenesis	0.0474047	4	Cux2/Eef2k/Kalrn/Reln
GO:0070536	protein K63-linked deubiquitination	0.0474047	4	Gm5136/Otud7a/Psmd14/Usp25
GO:0090344	negative regulation of cell aging	0.0474047	4	Akt3/March5/Plk2/Pten
GO:1901889	negative regulation of cell junction assembly	0.0474047	4	Clasp2/Pten/Rcc2/Rock1
GO:1902683	regulation of receptor localization to synapse	0.0474047	4	Arhgap44/Gsk3b/Kalrn/Nptn
GO:0003205	cardiac chamber development	0.0475309	18	Ap2b1/Cited2/Cpe/Fzd1/Hey2/Lrp6/Matr3/Nfatc1/Prox1/Rbm15/Robo1/Ryr2/Sox4/Stra6/Tgfb2/Tgfbr3/Vangl2/Zfpm2
GO:0071229	cellular response to acid chemical	0.0475309	18	Abca1/Add1/Col1a1/Col4a1/Cpeb1/Epha3/Foxp1/Grin2a/Mir346/Mir365-1/Pid1/Plcb1/Prkaa2/Prkn/Rragc/Sesn1/Ubr2/Zeb1
GO:0090276	regulation of peptide hormone secretion	0.0475309	18	Clock/Efna5/Eny2/Epha5/Gpr39/Gpr68/Hnf4a/Kalrn/Madd/Mcu/Mgea5/Nrxn1/Pax6/Pfkm/Prkn/Ptpn11/Sox4/Syt7
GO:0010632	regulation of epithelial cell migration	0.048357	20	Akt3/Capn7/Clasp2/Mmrn2/Pik3c2a/Plk2/Prkd1/Prox1/Pten/Ptprm/Ptprr/Sema5a/Smoc2/Stat5a/Strap/Synj2bp/Tacr1/Tgfb2/Tgfbr3/Wnt7a
GO:0046578	regulation of Ras protein signal transduction	0.048357	20	Abca1/Abra/Als2/Arap3/Arhgap42/Arhgap44/Arhgef12/Auts2/Cdh2/Cyth3/Eps8/Fgd4/Kalrn/Madd/Psd3/Ralgps1/Robo1/Rtn4r/Tgfb2/Trio
GO:0046883	regulation of hormone secretion	0.0484415	23	C1qtnf1/Clock/Edn2/Efna5/Eny2/Epha5/Gpr39/Gpr68/Hnf4a/Inha/Kalrn/Madd/Mcu/Mgea5/Nrxn1/Pax6/Pfkm/Prkn/Ptpn11/Snap25/Sox4/Syt7/Tacr1
GO:0051017	actin filament bundle assembly	0.0487798	16	Add1/Bag4/Braf/Cald1/Clasp2/Dpysl3/Eps8/Fmn2/Gas7/Limch1/Ppfia1/Prkn/Rock1/Spire1/Swap70/Tacr1
GO:0010827	regulation of glucose transmembrane transport	0.0491117	9	Ahi1/Braf/Lmbrd1/Mapk14/Mgea5/Osbpl8/Pid1/Prkcb/Ptpn11
GO:2000181	negative regulation of blood vessel morphogenesis	0.0491571	11	Adgrb3/Col4a3/Ism1/Minar1/Mmrn2/Plk2/Ptprm/Rock1/Synj2bp/Tcf4/Tgfb2
GO:0097581	lamellipodium organization	0.0494722	10	Ablim1/Auts2/Cdh13/Fgd4/Hdac4/Nck1/Nckap1/Srgap2/Ssh2/Vcl
GO:1902882	regulation of response to oxidative stress	0.0494722	10	Fbxo7/Foxp1/Fut8/Fzd1/Lrrk2/Prkn/Sesn1/Sfpq/Tbc1d24/Ubqln1
GO:1902905	positive regulation of supramolecular fiber organization	0.0496899	17	Apc/Bag4/Braf/Clip1/Fmn2/Jmy/Limch1/Nck1/Nckap1/Pde4dip/Prox1/Sema5a/Spire1/Stmn2/Swap70/Tacr1/Terf1

## Sheet: HippocampusPSHETvsCtrlHETHypo
Dataset 2: Hypo DhMR-associated gene ontologies
Hippocampus
PS HET vs Control HET
GO ID	Description	P-value	# of genes	Gene Symbol
GO:0032528	microvillus organization	0.000523884	7	Ezr/Podxl/Ptpn11/Rap1gap/Rapgef2/Ush1c/Vil1
GO:0034331	cell junction maintenance	0.0005258	5	Kifc3/Mtss1/Pard6a/Rassf8/Whrn
GO:0032530	regulation of microvillus organization	0.00130236	5	Ezr/Podxl/Rap1gap/Ush1c/Vil1
GO:0035235	ionotropic glutamate receptor signaling pathway	0.00130236	5	Atp1a3/Camk2a/Cdk5r1/Grin2a/Grin2b
GO:0038127	ERBB signaling pathway	0.00143609	13	Akt1/Caml/Dab2ip/Egf/Hap1/Hip1/Hip1r/Mvb12b/Ptk2/Ptpn11/Ptprr/Rhbdf1/Vil1
GO:0007173	epidermal growth factor receptor signaling pathway	0.00179879	12	Akt1/Caml/Dab2ip/Egf/Hap1/Hip1/Hip1r/Mvb12b/Ptk2/Ptpn11/Rhbdf1/Vil1
GO:0009100	glycoprotein metabolic process	0.00205664	25	Adamts12/Alg1/B4galt7/Chst11/Chst8/Ctnnb1/Dad1/Egflam/Eogt/Fbxo6/Galnt10/Galnt18/Gfpt1/Gxylt2/Ispd/Man1a/Man2a1/Mgat1/Pawr/Ramp1/St3gal5/St6gal1/Sulf1/Tet2/Xylt1
GO:0048839	inner ear development	0.00212397	20	Abr/Cebpd/Celsr1/Cux1/Fgfr3/Frem2/Fzd6/Hpn/Kcnma1/Kcnq4/Myo15/Notch1/Nr4a3/Ntn1/Otop1/Ptpn11/Scrib/Ush1c/Ush2a/Whrn
GO:0060039	pericardium development	0.00246004	6	Bmp7/Epo/Heg1/Mecom/Notch1/Rxra
GO:0010507	negative regulation of autophagy	0.00286807	9	Akt1/Becn1/Chmp4b/Clec16a/Mcl1/Ptk2/Qsox1/Tbc1d14/Usp30
GO:0060742	epithelial cell differentiation involved in prostate gland development	0.00349843	4	Ctnnb1/Notch1/Psapl1/Rxra
GO:0070509	calcium ion import	0.00423159	10	Cacna1c/Cacna1g/Cacnb2/Casr/Ctnnb1/Egf/Hrh1/Pawr/Slc8a2/Trpv4
GO:0043525	positive regulation of neuron apoptotic process	0.00457304	9	Casp6/Cdk5r1/Ctnnb1/Fgfr3/Jun/Kcnma1/Mcl1/Pawr/Pin1
GO:0051453	regulation of intracellular pH	0.00476314	8	Atp6v0a2/Atp6v0a4/Slamf8/Slc4a11/Slc4a5/Slc9a1/Slc9a8/Slc9a9
GO:0007156	homophilic cell adhesion via plasma membrane adhesion molecules	0.00489795	11	Celsr1/Celsr3/Dscam/Dscaml1/Igsf9b/Nectin2/Nrcam/Palld/Ptprm/Ptprt/Sdk1
GO:0032536	regulation of cell projection size	0.00519707	4	Ezr/Ush1c/Vil1/Wnt7b
GO:0006816	calcium ion transport	0.00530352	31	Cachd1/Cacna1c/Cacna1g/Cacnb2/Cacng2/Camk2a/Casr/Cbarp/Cracr2a/Ctnnb1/Egf/Epo/Grin2a/Grin2b/Hap1/Homer3/Hrh1/Htt/Mylk/Nfatc1/Pawr/Pkd2l1/Ramp1/Rcvrn/Slc24a2/Slc8a2/Slc9a1/Srl/Stac/Tlr9/Trpv4
GO:0061383	trabecula morphogenesis	0.00559882	8	Adgrg6/Bmp7/Col1a1/Fgfr3/Heg1/Nfatc1/Notch1/Ppargc1b
GO:0007612	learning	0.00638902	17	Atp1a3/Cacna1c/Cntnap2/Drd5/Epm2a/Ghrl/Grin2a/Grin2b/Grm4/Hrh1/Htt/Jun/Shank2/Slc24a2/Slc6a1/Slc8a2/Sorcs3
GO:0008037	cell recognition	0.006665	12	Adgrb1/Aldoa/Casp6/Cdk5r1/Celsr3/Cntnap2/Crtam/Dock8/Dscam/Dscaml1/Nrcam/Spesp1
GO:0070838	divalent metal ion transport	0.0068993	33	Cachd1/Cacna1c/Cacna1g/Cacnb2/Cacng2/Camk2a/Casr/Cbarp/Cracr2a/Ctnnb1/Egf/Epo/Grin2a/Grin2b/Hap1/Homer3/Hrh1/Htt/Mylk/Nfatc1/Pawr/Pkd2l1/Ramp1/Rcvrn/Slc24a2/Slc39a13/Slc39a3/Slc8a2/Slc9a1/Srl/Stac/Tlr9/Trpv4
GO:0030004	cellular monovalent inorganic cation homeostasis	0.00707401	10	Atp1a3/Atp6v0a2/Atp6v0a4/Kcnma1/Slamf8/Slc4a11/Slc4a5/Slc9a1/Slc9a8/Slc9a9
GO:0003206	cardiac chamber morphogenesis	0.00711211	15	Adgrg6/Bmp7/Ctnnb1/Dhrs3/Epo/Fgfrl1/Heg1/Lrp2/Nfatc1/Notch1/Rxra/Sav1/Sox4/Tbx3/Zfpm1
GO:0072511	divalent inorganic cation transport	0.00724219	33	Cachd1/Cacna1c/Cacna1g/Cacnb2/Cacng2/Camk2a/Casr/Cbarp/Cracr2a/Ctnnb1/Egf/Epo/Grin2a/Grin2b/Hap1/Homer3/Hrh1/Htt/Mylk/Nfatc1/Pawr/Pkd2l1/Ramp1/Rcvrn/Slc24a2/Slc39a13/Slc39a3/Slc8a2/Slc9a1/Srl/Stac/Tlr9/Trpv4
GO:0007252	I-kappaB phosphorylation	0.00737065	4	Akt1/Dab2ip/Tlr9/Traf2
GO:0042472	inner ear morphogenesis	0.00739268	12	Abr/Celsr1/Fzd6/Hpn/Kcnq4/Myo15/Nr4a3/Ntn1/Otop1/Scrib/Ush1c/Whrn
GO:0016242	negative regulation of macroautophagy	0.00829392	5	Becn1/Chmp4b/Clec16a/Qsox1/Usp30
GO:0043406	positive regulation of MAP kinase activity	0.00839766	18	Adam8/Adam9/Cxcl17/Dab2ip/Egf/Ghrl/Grm4/Lpar2/Map2k6/Map3k1/Map3k4/Mst1r/Pik3r6/Ptpn11/Tlr9/Traf2/Traf7/Wnt7b
GO:0001503	ossification	0.00851122	28	Akt1/Atp6v0a4/Bmp7/Casr/Cbs/Cebpd/Col13a1/Col1a1/Ctnnb1/Dhrs3/Fgfr3/Fzd9/Hspg2/Icmt/Id4/Il6st/Kremen1/Mtss1/Nfatc1/Notch1/Ppargc1b/Ptk2/Rflna/Sort1/Wnt7b/Wwox/Xylt1/Zbtb16
GO:0030641	regulation of cellular pH	0.00878209	8	Atp6v0a2/Atp6v0a4/Slamf8/Slc4a11/Slc4a5/Slc9a1/Slc9a8/Slc9a9
GO:0022010	central nervous system myelination	0.0100677	4	Fgfr3/Id4/Omg/Tenm4
GO:0032291	axon ensheathment in central nervous system	0.0100677	4	Fgfr3/Id4/Omg/Tenm4
GO:0071902	positive regulation of protein serine/threonine kinase activity	0.0107664	21	Adam8/Adam9/Ccnd3/Cxcl17/Dab2ip/Egf/Ghrl/Grm4/Lpar2/Map2k6/Map3k1/Map3k4/Mapre3/Mst1r/Pik3r6/Ptpn11/Rapgef2/Tlr9/Traf2/Traf7/Wnt7b
GO:0030850	prostate gland development	0.0109384	7	Bmp7/Ctnnb1/Id4/Notch1/Psapl1/Rxra/Sulf1
GO:1901021	positive regulation of calcium ion transmembrane transporter activity	0.0112575	6	Cacnb2/Cracr2a/Hap1/Htt/Slc9a1/Stac
GO:0098609	cell-cell adhesion	0.0120532	46	Adam8/Add2/Akt1/Arvcf/Bmp7/Card11/Carmil2/Cdk5r1/Celsr1/Celsr3/Cldn5/Col13a1/Ctnnb1/Dock8/Dscam/Dscaml1/Epo/Fgfrl1/Igsf9b/Il6st/Kif26b/Kifc3/Lims1/Lrrc4b/Malt1/Nectin2/Nr4a3/Nrcam/Ntn1/Palld/Pawr/Pik3r6/Pip5k1c/Podxl/Ptk2/Ptprm/Ptprt/Rap1gap/Scrib/Sdk1/Tenm4/Trpv4/Ttyh1/Wnt7b/Zbtb16/Zmiz1
GO:0003007	heart morphogenesis	0.0121044	22	Adgrg6/Bmp7/Ctnnb1/Dhrs3/Epo/Erg/Fgfrl1/Heg1/Jun/Lrp2/Myom3/Ncor2/Nfatc1/Notch1/Rxra/Sav1/Snai1/Sox4/Tbx3/Wnt16/Zfpm1/Zmiz1
GO:0048562	embryonic organ morphogenesis	0.0125246	24	Abr/Bmp7/Celsr1/Chst11/Ctnnb1/Dscaml1/Fzd6/Hpn/Hspg2/Kcnq4/Mthfd1l/Myo15/Notch1/Nr4a3/Ntn1/Otop1/Phactr4/Scrib/Six3/Slc39a3/T2/Tbx3/Ush1c/Whrn
GO:0046676	negative regulation of insulin secretion	0.0127018	7	Ghrl/Hadh/Midn/Oit1/Pim3/Ptpn11/Srebf1
GO:0010506	regulation of autophagy	0.0127234	18	Akt1/Becn1/Chmp4b/Clec16a/Depp1/Epm2a/Ercc4/Htt/Irgm1/Mcl1/Mtcl1/Ptk2/Qsox1/Srebf1/Tbc1d14/Tlr9/Trim8/Usp30
GO:0007340	acrosome reaction	0.0129294	5	Abhd2/Plb1/Spesp1/Spink13/Syt6
GO:0043243	positive regulation of protein complex disassembly	0.0129294	5	Carmil2/Clec16a/Irgm1/Trpv4/Vil1
GO:0071869	response to catecholamine	0.0129294	5	Adcy6/Dnm2/Drd5/Nr4a3/Slc9a1
GO:0071870	cellular response to catecholamine stimulus	0.0129294	5	Adcy6/Dnm2/Drd5/Nr4a3/Slc9a1
GO:0035136	forelimb morphogenesis	0.0133789	6	Cacna1c/Crabp2/Ctnnb1/Mecom/Tbx3/Zbtb16
GO:0043583	ear development	0.0137311	20	Abr/Cebpd/Celsr1/Cux1/Fgfr3/Frem2/Fzd6/Hpn/Kcnma1/Kcnq4/Myo15/Notch1/Nr4a3/Ntn1/Otop1/Ptpn11/Scrib/Ush1c/Ush2a/Whrn
GO:0006029	proteoglycan metabolic process	0.0149147	8	Adamts12/B4galt7/Chst11/Chst8/Ctnnb1/Egflam/Sulf1/Xylt1
GO:0014003	oligodendrocyte development	0.015795	5	Eif2b5/Fgfr3/Id4/Omg/Tenm4
GO:0071867	response to monoamine	0.015795	5	Adcy6/Dnm2/Drd5/Nr4a3/Slc9a1
GO:0071868	cellular response to monoamine stimulus	0.015795	5	Adcy6/Dnm2/Drd5/Nr4a3/Slc9a1
GO:1902742	apoptotic process involved in development	0.015795	5	Bmp7/Notch1/Scrib/Six3/Wnt7b
GO:0008038	neuron recognition	0.0168259	7	Casp6/Cdk5r1/Celsr3/Cntnap2/Dscam/Dscaml1/Nrcam
GO:0009101	glycoprotein biosynthetic process	0.017505	19	Alg1/B4galt7/Chst11/Chst8/Ctnnb1/Dad1/Eogt/Galnt10/Galnt18/Gfpt1/Gxylt2/Ispd/Mgat1/Pawr/Ramp1/St3gal5/St6gal1/Tet2/Xylt1
GO:0007169	transmembrane receptor protein tyrosine kinase signaling pathway	0.0175845	38	Adamts12/Akt1/Angpt4/Blk/Caml/Cav2/Ccnd3/Cdk5r1/Col1a1/Ctnnb1/Dab2ip/Efna4/Egf/Fgfr3/Fgfr4/Fgfrl1/Gfra1/Gigyf1/Grb14/Hap1/Hip1/Hip1r/Mst1r/Mvb12b/Notch1/Nr4a3/Ptk2/Ptpn11/Ptprr/Ptprt/Rapgef2/Rhbdf1/Smarcc1/Sort1/Srebf1/Stxbp4/Sulf1/Vil1
GO:0043065	positive regulation of apoptotic process	0.0180415	40	Adam8/Akt1/Apbb2/Bcl2l14/Bmp7/Camk2a/Casp6/Cdk5r1/Col18a1/Ctnnb1/Dab2ip/Eif2b5/Fgfr3/Fnip1/Grin2a/Hip1/Hip1r/Htt/Jun/Kcnma1/Map2k6/Mcl1/Mtch1/Notch1/Nr4a3/Pawr/Pin1/Rapgef2/Rps6ka2/Rxra/Sav1/Scrib/Senp1/Slc9a1/Sort1/Sox4/Traf2/Traf7/Wwox/Zbtb16
GO:0000187	activation of MAPK activity	0.0186819	10	Cxcl17/Dab2ip/Egf/Ghrl/Grm4/Lpar2/Map2k6/Map3k1/Ptpn11/Wnt7b
GO:0051092	positive regulation of NF-kappaB transcription factor activity	0.0187976	11	Adam8/Amh/Camk2a/Card11/Card14/Malt1/Rps6ka5/Tlr9/Traf2/Trappc9/Trim8
GO:0055008	cardiac muscle tissue morphogenesis	0.0189376	8	Ctnnb1/Epo/Heg1/Lrp2/Myom3/Notch1/Rxra/Zfpm1
GO:0035115	embryonic forelimb morphogenesis	0.0190546	5	Cacna1c/Crabp2/Ctnnb1/Mecom/Tbx3
GO:0035315	hair cell differentiation	0.0192074	7	Cux1/Kcnma1/Notch1/Scrib/Ush1c/Ush2a/Whrn
GO:0043954	cellular component maintenance	0.0192074	7	Grin2b/Kifc3/Mtss1/Pard6a/Rassf8/Shank2/Whrn
GO:0060415	muscle tissue morphogenesis	0.0200779	9	Ctnnb1/Epo/Heg1/Lrp2/Mylk/Myom3/Notch1/Rxra/Zfpm1
GO:0043068	positive regulation of programmed cell death	0.0208156	40	Adam8/Akt1/Apbb2/Bcl2l14/Bmp7/Camk2a/Casp6/Cdk5r1/Col18a1/Ctnnb1/Dab2ip/Eif2b5/Fgfr3/Fnip1/Grin2a/Hip1/Hip1r/Htt/Jun/Kcnma1/Map2k6/Mcl1/Mtch1/Notch1/Nr4a3/Pawr/Pin1/Rapgef2/Rps6ka2/Rxra/Sav1/Scrib/Senp1/Slc9a1/Sort1/Sox4/Traf2/Traf7/Wwox/Zbtb16
GO:0042058	regulation of epidermal growth factor receptor signaling pathway	0.021815	7	Dab2ip/Egf/Hap1/Hip1/Hip1r/Mvb12b/Rhbdf1
GO:1903510	mucopolysaccharide metabolic process	0.021815	7	Ccnd3/Chst1/Chst11/Chst5/Egf/Egflam/Xylt1
GO:2000242	negative regulation of reproductive process	0.021815	7	Amh/Bmp7/Grb14/Rps6ka2/Snai1/Spink13/Sulf1
GO:0060411	cardiac septum morphogenesis	0.0225167	10	Bmp7/Dhrs3/Fgfrl1/Lrp2/Nfatc1/Notch1/Sav1/Sox4/Tbx3/Zfpm1
GO:0008544	epidermis development	0.0225409	21	Akt1/Apcdd1/Celsr1/Ctnnb1/Cux1/Edaradd/Fzd6/H2afy/Kazn/Kcnma1/Notch1/Palld/Ppl/Sav1/Scrib/Snai1/Tnfrsf19/Ush1c/Ush2a/Whrn/Wnt16
GO:0035116	embryonic hindlimb morphogenesis	0.0227267	5	Ctnnb1/Mecom/Notch1/Tbx3/Zbtb16
GO:0048384	retinoic acid receptor signaling pathway	0.0227267	5	Crabp2/Dhrs3/Esrrg/Rxra/Tgif1
GO:1902116	negative regulation of organelle assembly	0.0227267	5	Becn1/Cdk5rap2/Chmp4b/Dnm2/Tbc1d30
GO:0050680	negative regulation of epithelial cell proliferation	0.02364	12	Cav2/Dab2ip/Fgfr3/Ghrl/Hpn/Lims1/Mtss1/Ptprm/Rap1gap/Sav1/Sulf1/Wfdc1
GO:0043405	regulation of MAP kinase activity	0.0237483	21	Adam8/Adam9/Bmp7/Cbs/Cxcl17/Dab2ip/Dusp16/Egf/Ghrl/Grm4/Lpar2/Map2k6/Map3k1/Map3k4/Mst1r/Pik3r6/Ptpn11/Tlr9/Traf2/Traf7/Wnt7b
GO:0030073	insulin secretion	0.0238204	17	Blk/Cacna1c/Casr/Ghrl/Hadh/Htt/Ica1/Mafa/Midn/Nadk/Oit1/Pim3/Ptpn11/Sox4/Srebf1/Sstr5/Stxbp4
GO:0003281	ventricular septum development	0.0246344	10	Dnm2/Fgfrl1/Heg1/Lrp2/Nfatc1/Notch1/Sav1/Sox4/Tbx3/Zfpm1
GO:0006024	glycosaminoglycan biosynthetic process	0.0246468	6	B4galt7/Ccnd3/Chst11/Chst5/Egf/Xylt1
GO:0071242	cellular response to ammonium ion	0.0246468	6	Casp6/Cdk5r1/Chrm4/Dnm2/Hrh1/Ly6h
GO:0007423	sensory organ development	0.0250196	39	Abr/Bmp7/Cacna1c/Casp6/Cebpd/Celsr1/Ctnnb1/Cux1/Dscam/Fgfr3/Frem2/Fzd6/Grin2b/Hpn/Jun/Kcnma1/Kcnq4/Man2a1/Map3k1/Mertk/Myo15/Notch1/Nphp4/Nr4a3/Ntn1/Otop1/Phactr4/Ptpn11/Ptprm/Rxra/Scrib/Sdk1/Six3/Six5/Slc4a5/Tgif1/Ush1c/Ush2a/Whrn
GO:0051216	cartilage development	0.0264942	18	Adamts12/Bmp7/Cbs/Chst11/Col11a2/Col1a1/Creb3l2/Ctnnb1/Fgfr3/Hspg2/Matn2/Poc1a/Rflna/Snai1/Sulf1/Trpv4/Wnt7b/Zbtb16
GO:0060512	prostate gland morphogenesis	0.0268275	5	Bmp7/Id4/Notch1/Rxra/Sulf1
GO:0060740	prostate gland epithelium morphogenesis	0.0268275	5	Bmp7/Id4/Notch1/Rxra/Sulf1
GO:0015991	ATP hydrolysis coupled proton transport	0.0268389	4	Atp1a3/Atp6v0a2/Atp6v0a4/Atp6v0b
GO:0045742	positive regulation of epidermal growth factor receptor signaling pathway	0.0268389	4	Egf/Hap1/Hip1/Hip1r
GO:0086019	cell-cell signaling involved in cardiac conduction	0.0268389	4	Cacna1c/Cacna1g/Cacnb2/Kcnn2
GO:0003229	ventricular cardiac muscle tissue development	0.0277451	7	Ctnnb1/Epo/Heg1/Lrp2/Notch1/Rxra/Tbx3
GO:0060412	ventricular septum morphogenesis	0.0277451	7	Fgfrl1/Nfatc1/Notch1/Sav1/Sox4/Tbx3/Zfpm1
GO:0003183	mitral valve morphogenesis	0.0279494	3	Notch1/Sox4/Zfpm1
GO:0042640	anagen	0.0279494	3	Akt1/Ctnnb1/Notch1
GO:0060601	lateral sprouting from an epithelium	0.0279494	3	Bmp7/Celsr1/Sulf1
GO:0070970	interleukin-2 secretion	0.0279494	3	Card11/Carmil2/Ezr
GO:0086016	AV node cell action potential	0.0279494	3	Cacna1c/Cacna1g/Cacnb2
GO:0086027	AV node cell to bundle of His cell signaling	0.0279494	3	Cacna1c/Cacna1g/Cacnb2
GO:0086067	AV node cell to bundle of His cell communication	0.0279494	3	Cacna1c/Cacna1g/Cacnb2
GO:0030111	regulation of Wnt signaling pathway	0.0282643	22	Ankrd6/Apcdd1/Col1a1/Dab2ip/Egf/Fgfr3/Fzd6/Fzd9/Jade1/Kremen1/Lgr6/Notch1/Nphp4/Pin1/Rnf43/Six3/Sox4/Sulf1/Tmem198/Trabd2b/Wnt5b/Wwox
GO:0001501	skeletal system development	0.0291115	34	Adamts12/Bmp7/Cbs/Chst11/Col11a2/Col13a1/Col1a1/Creb3l2/Ctnnb1/Dhrs3/Dscaml1/Fgfr3/Fgfrl1/Ghrl/Gna11/Hspg2/Matn2/Mthfd1l/Poc1a/Ppargc1b/Ptpn11/Rai1/Rflna/Slc39a3/Snai1/Sox4/Sulf1/Tbx3/Trpv4/Wnt7b/Wwox/Xylt1/Zbtb16/Zfpm1
GO:0006885	regulation of pH	0.0292008	8	Atp6v0a2/Atp6v0a4/Slamf8/Slc4a11/Slc4a5/Slc9a1/Slc9a8/Slc9a9
GO:1901019	regulation of calcium ion transmembrane transporter activity	0.0292008	8	Cacnb2/Cbarp/Cracr2a/Hap1/Htt/Slc9a1/Stac/Tlr9
GO:1901216	positive regulation of neuron death	0.0292929	10	Casp6/Cdk5r1/Ctnnb1/Fgfr3/Grin2b/Jun/Kcnma1/Mcl1/Pawr/Pin1
GO:2000177	regulation of neural precursor cell proliferation	0.0292929	10	Ctnnb1/Dct/Disp3/Egf/Fzd9/Lims1/Lrp2/Notch1/Ptbp2/Six3
GO:0001570	vasculogenesis	0.0295914	9	Ctnnb1/Epo/Heg1/Myo18b/Notch1/Ptk2/Rapgef2/Wnt7b/Zmiz1
GO:0009612	response to mechanical stimulus	0.0305862	14	Akt1/Cnn2/Cntnap2/Col1a1/Ctnnb1/Grin2b/Hpn/Htt/Jun/Pawr/Piezo2/Pkd2l1/Ptpn11/Slc9a1
GO:1901184	regulation of ERBB signaling pathway	0.031084	7	Dab2ip/Egf/Hap1/Hip1/Hip1r/Mvb12b/Rhbdf1
GO:2000179	positive regulation of neural precursor cell proliferation	0.031084	7	Ctnnb1/Dct/Disp3/Egf/Fzd9/Lrp2/Notch1
GO:0060977	coronary vasculature morphogenesis	0.0313707	5	Ctnnb1/Epo/Lrp2/Notch1/Rxra
GO:0110111	negative regulation of animal organ morphogenesis	0.0313707	5	Bmp7/Ctnnb1/Lims1/Notch1/Sulf1
GO:0001508	action potential	0.0318683	12	Cacna1c/Cacna1g/Cacnb2/Dpp6/Gna11/Grin2a/Grin2b/Kcnma1/Kcnn2/Nrcam/Pawr/Slc9a1
GO:0042552	myelination	0.0318683	12	Abcd2/Adgrg6/Akt1/Cldn5/Ctnnb1/Eif2b5/Fgfr3/Id4/Omg/Rxra/Tenm4/Zfp24
GO:0006493	protein O-linked glycosylation	0.0321268	6	Eogt/Galnt10/Galnt18/Gxylt2/Ispd/Tet2
GO:0030865	cortical cytoskeleton organization	0.0321268	6	Actn1/Ezr/Rtkn/Trpv4/Vil1/Wipf1
GO:0050766	positive regulation of phagocytosis	0.0321268	6	Abr/Dnm2/Mertk/Myo18a/Ptk2/Rap1gap
GO:0055010	ventricular cardiac muscle tissue morphogenesis	0.0321268	6	Ctnnb1/Epo/Heg1/Lrp2/Notch1/Rxra
GO:0006486	protein glycosylation	0.0326123	14	Alg1/B4galt7/Dad1/Eogt/Galnt10/Galnt18/Gfpt1/Gxylt2/Ispd/Mgat1/Ramp1/St3gal5/St6gal1/Tet2
GO:0043413	macromolecule glycosylation	0.0326123	14	Alg1/B4galt7/Dad1/Eogt/Galnt10/Galnt18/Gfpt1/Gxylt2/Ispd/Mgat1/Ramp1/St3gal5/St6gal1/Tet2
GO:0050796	regulation of insulin secretion	0.0326123	14	Blk/Casr/Ghrl/Hadh/Ica1/Midn/Nadk/Oit1/Pim3/Ptpn11/Sox4/Srebf1/Sstr5/Stxbp4
GO:0001958	endochondral ossification	0.0326568	4	Cbs/Col13a1/Col1a1/Hspg2
GO:0015988	energy coupled proton transmembrane transport, against electrochemical gradient	0.0326568	4	Atp1a3/Atp6v0a2/Atp6v0a4/Atp6v0b
GO:0036075	replacement ossification	0.0326568	4	Cbs/Col13a1/Col1a1/Hspg2
GO:0042558	pteridine-containing compound metabolic process	0.0326568	4	Mthfd1l/Pcbd2/Pts/Sardh
GO:0090662	ATP hydrolysis coupled transmembrane transport	0.0326568	4	Atp1a3/Atp6v0a2/Atp6v0a4/Atp6v0b
GO:0099131	ATP hydrolysis coupled ion transmembrane transport	0.0326568	4	Atp1a3/Atp6v0a2/Atp6v0a4/Atp6v0b
GO:0099132	ATP hydrolysis coupled cation transmembrane transport	0.0326568	4	Atp1a3/Atp6v0a2/Atp6v0a4/Atp6v0b
GO:0120033	negative regulation of plasma membrane bounded cell projection assembly	0.0326568	4	Dnm2/Rab3ip/Rap1gap/Tbc1d30
GO:0001942	hair follicle development	0.0345436	10	Akt1/Apcdd1/Celsr1/Ctnnb1/Edaradd/Fzd6/Notch1/Sav1/Snai1/Tnfrsf19
GO:0098742	cell-cell adhesion via plasma-membrane adhesion molecules	0.0345541	15	Arvcf/Celsr1/Celsr3/Dscam/Dscaml1/Fgfrl1/Igsf9b/Lrrc4b/Nectin2/Nrcam/Palld/Ptprm/Ptprt/Sdk1/Tenm4
GO:0001885	endothelial cell development	0.0346822	7	Cldn5/Col18a1/Ctnnb1/Ezr/Heg1/Rapgef2/Wnt7b
GO:0033045	regulation of sister chromatid segregation	0.0346822	7	Becn1/Cdk5rap2/Ctnnb1/H2afy/Nek6/Rmi2/Zfp207
GO:0090278	negative regulation of peptide hormone secretion	0.0346822	7	Ghrl/Hadh/Midn/Oit1/Pim3/Ptpn11/Srebf1
GO:0010717	regulation of epithelial to mesenchymal transition	0.0353695	9	Bmp7/Col1a1/Ctnnb1/Dab2ip/Hpn/Ldlrad4/Notch1/Pawr/Snai1
GO:0048644	muscle organ morphogenesis	0.0353695	9	Ctnnb1/Epo/Heg1/Lrp2/Mylk/Myom3/Notch1/Rxra/Zfpm1
GO:0048705	skeletal system morphogenesis	0.0356685	19	Bmp7/Cbs/Chst11/Col11a2/Col13a1/Col1a1/Ctnnb1/Dhrs3/Dscaml1/Fgfr3/Hspg2/Matn2/Mthfd1l/Poc1a/Ppargc1b/Rflna/Slc39a3/Trpv4/Wwox
GO:0061448	connective tissue development	0.0357289	22	Adamts12/Bmp7/Cbs/Chst11/Col11a2/Col1a1/Creb3l2/Ctnnb1/Fgfr3/Ghrl/Hspg2/Id4/Matn2/Notch1/Poc1a/Rflna/Slc39a13/Snai1/Sulf1/Trpv4/Wnt7b/Zbtb16
GO:0060428	lung epithelium development	0.0363644	6	Fgfr3/Fgfr4/Ncor2/Rcn3/Sav1/Wnt7b
GO:0071260	cellular response to mechanical stimulus	0.0363644	6	Akt1/Cnn2/Col1a1/Ctnnb1/Piezo2/Ptpn11
GO:0003156	regulation of animal organ formation	0.0363674	5	Bmp7/Ctnnb1/Fgfr4/Notch1/Sulf1
GO:0006890	retrograde vesicle-mediated transport, Golgi to ER	0.0363674	5	Arfgap3/Atp9a/Bicd2/Htt/Nbas
GO:0061384	heart trabecula morphogenesis	0.0363674	5	Adgrg6/Bmp7/Heg1/Nfatc1/Notch1
GO:0002328	pro-B cell differentiation	0.0364815	3	Fnip1/Notch1/Sox4
GO:0003174	mitral valve development	0.0364815	3	Notch1/Sox4/Zfpm1
GO:0003188	heart valve formation	0.0364815	3	Erg/Notch1/Zfpm1
GO:0014831	gastro-intestinal system smooth muscle contraction	0.0364815	3	Ghrl/Kcnma1/Sulf1
GO:0030220	platelet formation	0.0364815	3	Actn1/Ptpn11/Zfpm1
GO:0036344	platelet morphogenesis	0.0364815	3	Actn1/Ptpn11/Zfpm1
GO:0060572	morphogenesis of an epithelial bud	0.0364815	3	Bmp7/Ctnnb1/Sulf1
GO:0070593	dendrite self-avoidance	0.0364815	3	Dscam/Dscaml1/Nrcam
GO:0086014	atrial cardiac muscle cell action potential	0.0364815	3	Cacna1c/Cacnb2/Kcnn2
GO:0086026	atrial cardiac muscle cell to AV node cell signaling	0.0364815	3	Cacna1c/Cacnb2/Kcnn2
GO:0086066	atrial cardiac muscle cell to AV node cell communication	0.0364815	3	Cacna1c/Cacnb2/Kcnn2
GO:1901881	positive regulation of protein depolymerization	0.0364815	3	Carmil2/Trpv4/Vil1
GO:1902855	regulation of non-motile cilium assembly	0.0364815	3	Dnm2/Hap1/Htt
GO:0007272	ensheathment of neurons	0.0366746	12	Abcd2/Adgrg6/Akt1/Cldn5/Ctnnb1/Eif2b5/Fgfr3/Id4/Omg/Rxra/Tenm4/Zfp24
GO:0008366	axon ensheathment	0.0366746	12	Abcd2/Adgrg6/Akt1/Cldn5/Ctnnb1/Eif2b5/Fgfr3/Id4/Omg/Rxra/Tenm4/Zfp24
GO:0042471	ear morphogenesis	0.0366746	12	Abr/Celsr1/Fzd6/Hpn/Kcnq4/Myo15/Nr4a3/Ntn1/Otop1/Scrib/Ush1c/Whrn
GO:0003231	cardiac ventricle development	0.0369871	13	Ctnnb1/Dnm2/Epo/Fgfrl1/Heg1/Lrp2/Nfatc1/Notch1/Rxra/Sav1/Sox4/Tbx3/Zfpm1
GO:0090596	sensory organ morphogenesis	0.0373832	22	Abr/Bmp7/Casp6/Celsr1/Ctnnb1/Dscam/Fgfr3/Fzd6/Hpn/Kcnq4/Man2a1/Myo15/Nr4a3/Ntn1/Otop1/Phactr4/Ptprm/Scrib/Sdk1/Six3/Ush1c/Whrn
GO:0031023	microtubule organizing center organization	0.0374009	10	Bcas3/Calml4/Cdk5rap2/Cep131/Chmp4b/Ctnnb1/Deup1/Pard6a/Poc1a/Sdccag8
GO:0032092	positive regulation of protein binding	0.0374009	10	Add2/Amfr/Hip1r/Hspa4/Mapre3/Nvl/Pin1/Plcl1/Rapgef2/Traf2
GO:0010942	positive regulation of cell death	0.0376475	42	Adam8/Akt1/Apbb2/Bcl2l14/Bmp7/Camk2a/Casp6/Cdk5r1/Col18a1/Ctnnb1/Dab2ip/Dnmt3a/Eif2b5/Fgfr3/Fnip1/Grin2a/Grin2b/Hip1/Hip1r/Htt/Jun/Kcnma1/Map2k6/Mcl1/Mtch1/Notch1/Nr4a3/Pawr/Pin1/Rapgef2/Rps6ka2/Rxra/Sav1/Scrib/Senp1/Slc9a1/Sort1/Sox4/Traf2/Traf7/Wwox/Zbtb16
GO:1901615	organic hydroxy compound metabolic process	0.0378974	27	Abca2/Akr7a5/Cyp2d22/Dct/Dhrs3/Disp3/Ebpl/Fdft1/Fgfr4/Gk5/Grin2a/Grk3/Hpn/Htt/Ippk/Kcnma1/Lbr/Nr5a2/Pcbd2/Plb1/Pts/Rapgef2/Slc5a5/Snai1/Sncaip/Srebf1/Tm7sf2
GO:0003205	cardiac chamber development	0.0382372	16	Adgrg6/Bmp7/Ctnnb1/Dhrs3/Dnm2/Epo/Fgfrl1/Heg1/Lrp2/Nfatc1/Notch1/Rxra/Sav1/Sox4/Tbx3/Zfpm1
GO:0042303	molting cycle	0.0386312	11	Akt1/Apcdd1/Celsr1/Ctnnb1/Edaradd/Fzd6/Nfatc1/Notch1/Sav1/Snai1/Tnfrsf19
GO:0042633	hair cycle	0.0386312	11	Akt1/Apcdd1/Celsr1/Ctnnb1/Edaradd/Fzd6/Nfatc1/Notch1/Sav1/Snai1/Tnfrsf19
GO:0051347	positive regulation of transferase activity	0.0390028	33	Adam8/Adam9/Ccnd3/Cdk5r1/Chtf18/Ctnnb1/Cxcl17/Dab2ip/Egf/Epo/Fgfr3/Ghrl/Grm4/Lpar2/Malt1/Map2k6/Map3k1/Map3k4/Mapre3/Mst1r/Nek6/Nek7/Nvl/Pik3r4/Pik3r6/Pin1/Ptk2/Ptpn11/Rapgef2/Tlr9/Traf2/Traf7/Wnt7b
GO:0060113	inner ear receptor cell differentiation	0.0390463	8	Cux1/Fgfr3/Kcnma1/Notch1/Scrib/Ush1c/Ush2a/Whrn
GO:0051016	barbed-end actin filament capping	0.0391536	4	Add2/Capg/Carmil2/Vil1
GO:1901186	positive regulation of ERBB signaling pathway	0.0391536	4	Egf/Hap1/Hip1/Hip1r
GO:0022404	molting cycle process	0.0404175	10	Akt1/Apcdd1/Celsr1/Ctnnb1/Edaradd/Fzd6/Notch1/Sav1/Snai1/Tnfrsf19
GO:0022405	hair cycle process	0.0404175	10	Akt1/Apcdd1/Celsr1/Ctnnb1/Edaradd/Fzd6/Notch1/Sav1/Snai1/Tnfrsf19
GO:0098773	skin epidermis development	0.0404175	10	Akt1/Apcdd1/Celsr1/Ctnnb1/Edaradd/Fzd6/Notch1/Sav1/Snai1/Tnfrsf19
GO:1905330	regulation of morphogenesis of an epithelium	0.0404175	10	Adamts12/Ankrd6/Bmp7/Celsr1/Celsr3/Ctnnb1/Fzd6/Rxra/Sulf1/Wnt7b
GO:0008347	glial cell migration	0.0409443	6	Apcdd1/Cdk5r1/Ctnnb1/Dab2ip/Matn2/Scrib
GO:0003018	vascular process in circulatory system	0.0411394	15	Abr/Adcy6/Akt1/Cacna1c/Cacna1g/Casr/Cbs/Drd5/Hrh1/Kcnma1/Manf/Ptk2/Ptprm/Rap1gds1/Trpv4
GO:0071695	anatomical structure maturation	0.0416953	14	Akt1/Cdk5r1/Cntnap2/Ctnnb1/Dmc1/Epo/Fgfr3/Grb14/Notch1/Nrcam/Rflna/Rps6ka2/Six3/Xylt1
GO:0006040	amino sugar metabolic process	0.0418261	5	Chst1/Chst5/Gfpt1/Mgat1/St6gal1
GO:0071470	cellular response to osmotic stress	0.0418261	5	Epo/Mylk/Prkg2/Relb/Trpv4
GO:0007215	glutamate receptor signaling pathway	0.0418783	9	Atp1a3/Cacng2/Camk2a/Cdk5r1/Grin2a/Grin2b/Grm4/Homer3/Shank2
GO:0016241	regulation of macroautophagy	0.0418783	9	Becn1/Chmp4b/Clec16a/Epm2a/Htt/Irgm1/Qsox1/Tbc1d14/Usp30
GO:0001837	epithelial to mesenchymal transition	0.0419722	12	Bmp7/Col1a1/Ctnnb1/Dab2ip/Erg/Hpn/Ldlrad4/Nfatc1/Notch1/Pawr/Snai1/Wnt16
GO:0009913	epidermal cell differentiation	0.0420011	13	Cux1/H2afy/Kazn/Kcnma1/Notch1/Palld/Ppl/Sav1/Scrib/Ush1c/Ush2a/Whrn/Wnt16
GO:0030178	negative regulation of Wnt signaling pathway	0.0420011	13	Ankrd6/Apcdd1/Dab2ip/Fzd6/Jade1/Kremen1/Notch1/Nphp4/Rnf43/Six3/Trabd2b/Wnt5b/Wwox
GO:0010817	regulation of hormone levels	0.0422644	32	Blk/Cacna1c/Casr/Chst8/Crabp2/Cyp2d22/Dhrs3/Fgfr4/Ghrl/Hadh/Hpn/Hsd17b4/Htt/Ica1/Il11/Kcnma1/Lrp2/Mafa/Midn/Nadk/Oit1/Pim3/Plb1/Ptpn11/Safb/Slc5a5/Sox4/Srebf1/Sstr5/Stxbp4/Tbx3/Trpv4
GO:0071900	regulation of protein serine/threonine kinase activity	0.0425698	27	Adam8/Adam9/Bmp7/Cbs/Ccnd3/Ccnj/Cxcl17/Dab2ip/Dusp16/Egf/Ghrl/Grm4/H2afy/Htt/Lpar2/Map2k6/Map3k1/Map3k4/Mapre3/Mst1r/Pik3r6/Ptpn11/Rapgef2/Tlr9/Traf2/Traf7/Wnt7b
GO:0030203	glycosaminoglycan metabolic process	0.042767	8	B4galt7/Ccnd3/Chst1/Chst11/Chst5/Egf/Egflam/Xylt1
GO:0016055	Wnt signaling pathway	0.0435694	29	Ankrd6/Apcdd1/Celsr1/Celsr3/Col1a1/Ctnnb1/Dab2ip/Egf/Fgfr3/Fzd6/Fzd9/Jade1/Kremen1/Lgr6/Mertk/Mst1r/Notch1/Nphp4/Pin1/Rnf43/Six3/Sox4/Sulf1/Tmem198/Trabd2b/Wnt16/Wnt5b/Wnt7b/Wwox
GO:0090288	negative regulation of cellular response to growth factor stimulus	0.0448115	12	Adamts12/Cav2/Chst11/Dab2ip/Dnm2/Fam89b/Fgfrl1/Ldlrad4/Lrp2/Notch1/Pin1/Sulf1
GO:0071214	cellular response to abiotic stimulus	0.0454746	19	1700007K13Rik/Agap3/Akt1/Cnn2/Col1a1/Ctnnb1/Epo/Ercc4/Gna11/Ints7/Mylk/Nsmce3/Piezo2/Pkd2l1/Prkg2/Ptpn11/Relb/Slc9a1/Trpv4
GO:0104004	cellular response to environmental stimulus	0.0454746	19	1700007K13Rik/Agap3/Akt1/Cnn2/Col1a1/Ctnnb1/Epo/Ercc4/Gna11/Ints7/Mylk/Nsmce3/Piezo2/Pkd2l1/Prkg2/Ptpn11/Relb/Slc9a1/Trpv4
GO:1905114	cell surface receptor signaling pathway involved in cell-cell signaling	0.0455315	34	Ankrd6/Apcdd1/Celsr1/Celsr3/Col1a1/Ctnnb1/Dab2ip/Egf/Fgfr3/Fzd6/Fzd9/Ghrl/Grin2a/Grin2b/Igsf9b/Jade1/Kremen1/Lgr6/Mertk/Mst1r/Notch1/Nphp4/Pin1/Rnf43/Shank2/Six3/Sox4/Sulf1/Tmem198/Trabd2b/Wnt16/Wnt5b/Wnt7b/Wwox
GO:0042491	inner ear auditory receptor cell differentiation	0.0458725	6	Cux1/Kcnma1/Notch1/Scrib/Ush1c/Whrn
GO:0060351	cartilage development involved in endochondral bone morphogenesis	0.0458725	6	Cbs/Col1a1/Hspg2/Matn2/Poc1a/Trpv4
GO:0048385	regulation of retinoic acid receptor signaling pathway	0.0461851	3	Crabp2/Dhrs3/Tgif1
GO:2000209	regulation of anoikis	0.0461851	3	Mcl1/Notch1/Ptk2
GO:2000369	regulation of clathrin-dependent endocytosis	0.0461851	3	Dnm2/Hip1r/Tnk2
GO:2000811	negative regulation of anoikis	0.0461851	3	Mcl1/Notch1/Ptk2
GO:0045992	negative regulation of embryonic development	0.0463329	4	Bmp7/Ctnnb1/Snai1/Sulf1
GO:0060561	apoptotic process involved in morphogenesis	0.0463329	4	Bmp7/Notch1/Scrib/Wnt7b
GO:0198738	cell-cell signaling by wnt	0.0468195	29	Ankrd6/Apcdd1/Celsr1/Celsr3/Col1a1/Ctnnb1/Dab2ip/Egf/Fgfr3/Fzd6/Fzd9/Jade1/Kremen1/Lgr6/Mertk/Mst1r/Notch1/Nphp4/Pin1/Rnf43/Six3/Sox4/Sulf1/Tmem198/Trabd2b/Wnt16/Wnt5b/Wnt7b/Wwox
GO:0008542	visual learning	0.0470936	7	Atp1a3/Cacna1c/Drd5/Ghrl/Grin2a/Hrh1/Htt
GO:0032623	interleukin-2 production	0.0470936	7	Card11/Carmil2/Ezr/Homer3/Malt1/Pawr/Traf2
GO:1902600	proton transmembrane transport	0.0470936	7	Atp1a3/Atp6v0a2/Atp6v0a4/Atp6v0b/Otop1/Slc4a11/Slc9a1
GO:2000573	positive regulation of DNA biosynthetic process	0.0470936	7	Chtf18/Ctnnb1/Egf/Fgfr4/Map3k4/Nek7/Nvl
GO:0060071	Wnt signaling pathway, planar cell polarity pathway	0.0477526	5	Ankrd6/Celsr1/Celsr3/Fzd6/Wnt7b
GO:0007088	regulation of mitotic nuclear division	0.047781	12	Becn1/Bmp7/Bora/Ccnd3/Ccnj/Cdk5rap2/Chmp4b/Egf/Fgfr3/H2afy/Nek6/Zfp207
GO:0030198	extracellular matrix organization	0.0484903	17	Antxr1/Apbb2/Carmil2/Col11a2/Col13a1/Col18a1/Col1a1/Crispld2/Egflam/Fbln2/Fgfr4/Hpn/Hspg2/Loxl4/Notch1/Ptk2/Sulf1
GO:0070085	glycosylation	0.0495908	14	Alg1/B4galt7/Dad1/Eogt/Galnt10/Galnt18/Gfpt1/Gxylt2/Ispd/Mgat1/Ramp1/St3gal5/St6gal1/Tet2
GO:0042490	mechanoreceptor differentiation	0.0508929	8	Cux1/Fgfr3/Kcnma1/Notch1/Scrib/Ush1c/Ush2a/Whrn
GO:0030837	negative regulation of actin filament polymerization	0.0511536	6	Add2/Capg/Carmil2/Fhod3/Hip1r/Vil1
GO:0098662	inorganic cation transmembrane transport	0.0522756	37	Atp1a3/Atp6v0a2/Atp6v0a4/Atp6v0b/Cacna1c/Cacna1g/Cacnb2/Cacng2/Cbarp/Cracr2a/Dnm2/Dpp6/Fxyd2/Grin2a/Grin2b/Hap1/Hpn/Hrh1/Htt/Kcnma1/Kcnn2/Kcnq4/Otop1/Pawr/Pkd2l1/Slc24a2/Slc25a37/Slc39a13/Slc39a3/Slc4a11/Slc8a2/Slc9a1/Slc9a8/Slc9a9/Stac/Tlr9/Trpv4
GO:0043087	regulation of GTPase activity	0.0527007	21	Abr/Arhgap9/Asap1/Bcas3/Cav2/Dab2ip/Dock8/Lims1/Mtss1l/Pin1/Plxna4/Plxnc1/Rap1gap/Rap1gds1/Rapgef2/Rasa4/Rasgrp2/Scrib/Tbc1d14/Tbc1d2/Tbc1d30
GO:0003279	cardiac septum development	0.054119	12	Bmp7/Dhrs3/Dnm2/Fgfrl1/Heg1/Lrp2/Nfatc1/Notch1/Sav1/Sox4/Tbx3/Zfpm1
GO:0035137	hindlimb morphogenesis	0.0541501	5	Ctnnb1/Mecom/Notch1/Tbx3/Zbtb16
GO:0048013	ephrin receptor signaling pathway	0.0541501	5	Cdk5r1/Efna4/Notch1/Ptk2/Ptpn11
GO:0090175	regulation of establishment of planar polarity	0.0541501	5	Ankrd6/Celsr1/Celsr3/Fzd6/Wnt7b
GO:0051924	regulation of calcium ion transport	0.0541605	18	Cacna1g/Cacnb2/Camk2a/Casr/Cbarp/Cracr2a/Ctnnb1/Egf/Epo/Hap1/Homer3/Htt/Mylk/Pawr/Rcvrn/Slc9a1/Stac/Tlr9
GO:0007131	reciprocal meiotic recombination	0.0541925	4	Chtf18/Dmc1/Eme2/Ercc4
GO:0010719	negative regulation of epithelial to mesenchymal transition	0.0541925	4	Dab2ip/Hpn/Ldlrad4/Pawr
GO:0035825	homologous recombination	0.0541925	4	Chtf18/Dmc1/Eme2/Ercc4
GO:0009725	response to hormone	0.0554349	40	Abhd2/Adam9/Adcy6/Akt1/Bmp7/Camk2a/Cav2/Ccnd3/Cdk5r1/Chrm4/Ctnnb1/Eif2b5/Ghrl/Grb14/Hpn/Jun/Kcnma1/Ly6h/Me1/Msi1/Ncoa2/Ncor2/Notch1/Nr4a3/Nr5a2/Otop1/Ppargc1b/Ptk2/Ptpn11/Ramp1/Rxra/Safb/Slc9a1/Smarcc1/Sort1/Srebf1/Sstr5/Stxbp4/Trpv4/Zfp366
GO:0050880	regulation of blood vessel size	0.0565798	13	Adcy6/Akt1/Cacna1c/Cacna1g/Casr/Cbs/Drd5/Hrh1/Kcnma1/Manf/Ptk2/Ptprm/Rap1gds1
GO:0007632	visual behavior	0.056763	7	Atp1a3/Cacna1c/Drd5/Ghrl/Grin2a/Hrh1/Htt
GO:0042733	embryonic digit morphogenesis	0.056763	7	Chst11/Ctnnb1/Frem2/Fzd6/Notch1/Tbx3/Zbtb16
GO:0050764	regulation of phagocytosis	0.056763	7	Abr/Cnn2/Dnm2/Mertk/Myo18a/Ptk2/Rap1gap
GO:0006023	aminoglycan biosynthetic process	0.0567912	6	B4galt7/Ccnd3/Chst11/Chst5/Egf/Xylt1
GO:0006635	fatty acid beta-oxidation	0.0567912	6	Abcd2/Acsbg2/Akt1/Etfa/Hadh/Hsd17b4
GO:1903539	protein localization to postsynaptic membrane	0.0567912	6	Cacng2/Camk2a/Grin2a/Grip1/Nptxr/Scrib
GO:0009070	serine family amino acid biosynthetic process	0.0570203	3	Cbs/Ggt5/Sephs1
GO:0061430	bone trabecula morphogenesis	0.0570203	3	Col1a1/Fgfr3/Ppargc1b
GO:1902884	positive regulation of response to oxidative stress	0.0570203	3	H2afy/Mcl1/Pawr
GO:1905331	negative regulation of morphogenesis of an epithelium	0.0570203	3	Bmp7/Ctnnb1/Sulf1
GO:2000241	regulation of reproductive process	0.0574912	12	Amh/Bmp7/Ctnnb1/Grb14/Notch1/Phlda2/Plb1/Rps6ka2/Rxra/Snai1/Spink13/Sulf1
GO:0098660	inorganic ion transmembrane transport	0.0576759	38	Atp1a3/Atp6v0a2/Atp6v0a4/Atp6v0b/Cacna1c/Cacna1g/Cacnb2/Cacng2/Casr/Cbarp/Cracr2a/Dnm2/Dpp6/Fxyd2/Grin2a/Grin2b/Hap1/Hpn/Hrh1/Htt/Kcnma1/Kcnn2/Kcnq4/Otop1/Pawr/Pkd2l1/Slc24a2/Slc25a37/Slc39a13/Slc39a3/Slc4a11/Slc8a2/Slc9a1/Slc9a8/Slc9a9/Stac/Tlr9/Trpv4
GO:0002062	chondrocyte differentiation	0.0580178	11	Adamts12/Chst11/Col11a2/Creb3l2/Ctnnb1/Hspg2/Matn2/Poc1a/Rflna/Sulf1/Zbtb16
GO:0061351	neural precursor cell proliferation	0.0584679	14	Ctnnb1/Dct/Disp3/Egf/Fzd6/Fzd9/Id4/Lims1/Lrp2/Ncor2/Notch1/Ptbp2/Six3/Wnt7b
GO:0035150	regulation of tube size	0.0598606	13	Adcy6/Akt1/Cacna1c/Cacna1g/Casr/Cbs/Drd5/Hrh1/Kcnma1/Manf/Ptk2/Ptprm/Rap1gds1
GO:0042445	hormone metabolic process	0.0598606	13	Chst8/Crabp2/Cyp2d22/Dhrs3/Fgfr4/Hpn/Hsd17b4/Htt/Kcnma1/Plb1/Ptpn11/Safb/Slc5a5
GO:0007009	plasma membrane organization	0.0599537	8	Abcd2/Akt1/Asap1/Cav2/Dnm2/Mtss1/Mtss1l/Xkr8
GO:0051983	regulation of chromosome segregation	0.0599537	8	Becn1/Cdk5rap2/Chtf18/Ctnnb1/H2afy/Nek6/Rmi2/Zfp207
GO:0032147	activation of protein kinase activity	0.0609127	16	Adam9/Cxcl17/Dab2ip/Egf/Ghrl/Grm4/Lpar2/Malt1/Map2k6/Map3k1/Map3k4/Nek6/Ptpn11/Traf2/Traf7/Wnt7b
GO:0043547	positive regulation of GTPase activity	0.0609127	16	Abr/Asap1/Bcas3/Cav2/Dock8/Lims1/Mtss1l/Pin1/Rap1gap/Rap1gds1/Rapgef2/Rasgrp2/Scrib/Tbc1d14/Tbc1d2/Tbc1d30
GO:0035637	multicellular organismal signaling	0.0610013	12	Cacna1c/Cacna1g/Cacnb2/Cacng2/Dpp6/Drd5/Ghrl/Kcnma1/Kcnn2/Nrcam/Pawr/Slc9a1
GO:0006487	protein N-linked glycosylation	0.0610196	5	B4galt7/Dad1/Gfpt1/Mgat1/St6gal1
GO:0007212	dopamine receptor signaling pathway	0.0610196	5	Adcy6/Cav2/Drd5/Gna11/Htt
GO:0046605	regulation of centrosome cycle	0.0610196	5	Cdk5rap2/Cep131/Chmp4b/Ctnnb1/Poc1a
GO:0051568	histone H3-K4 methylation	0.0610196	5	Ctcfl/Ctnnb1/H2afy/Nelfa/Tet2
GO:0051784	negative regulation of nuclear division	0.0610196	5	Bmp7/Cdk5rap2/Fgfr3/Rps6ka2/Zfp207
GO:0006612	protein targeting to membrane	0.0615383	9	Cacng2/Cdk5r1/Chmp4b/Mtcl1/Rab3ip/Srp14/Zdhhc12/Zdhhc22/Zdhhc3
GO:0030316	osteoclast differentiation	0.0615383	9	Adam8/Ctnnb1/Efna4/Fgfr3/Nfatc1/Ocstamp/Ppargc1b/Sh3pxd2a/Tmem178
GO:0048736	appendage development	0.0616521	14	Bmp7/Cacna1c/Chst11/Crabp2/Ctnnb1/Frem2/Fzd6/Kremen1/Mecom/Notch1/Slc39a3/Sox4/Tbx3/Zbtb16
GO:0060173	limb development	0.0616521	14	Bmp7/Cacna1c/Chst11/Crabp2/Ctnnb1/Frem2/Fzd6/Kremen1/Mecom/Notch1/Slc39a3/Sox4/Tbx3/Zbtb16
GO:0048729	tissue morphogenesis	0.0623042	41	Adam8/Adamts12/Ankrd6/Artn/Bmp7/Carmil2/Casr/Celsr1/Celsr3/Ctnnb1/Egf/Epo/Fgfr3/Frem2/Fzd6/Heg1/Htt/Id4/Kif26b/Lrp2/Map3k1/Matn2/Mthfd1l/Mtss1/Mylk/Myom3/Nfatc1/Notch1/Nr4a3/Ntn1/Phactr4/Rxra/Scrib/Six3/Snai1/Sox4/Sulf1/Tbx3/Tgif1/Wnt7b/Zfpm1
GO:0035335	peptidyl-tyrosine dephosphorylation	0.0627253	4	Epm2a/Ptpn11/Ptpn13/Ptprt
GO:0036475	neuron death in response to oxidative stress	0.0627253	4	Ctnnb1/Mcl1/Nr4a3/Tldc1
GO:0051569	regulation of histone H3-K4 methylation	0.0627253	4	Ctcfl/Ctnnb1/H2afy/Nelfa
GO:1903203	regulation of oxidative stress-induced neuron death	0.0627253	4	Ctnnb1/Mcl1/Nr4a3/Tldc1
GO:0003179	heart valve morphogenesis	0.0627871	6	Erg/Fgfrl1/Nfatc1/Notch1/Sox4/Zfpm1
GO:0046847	filopodium assembly	0.0627871	6	Arhgef4/Bcas3/Ezr/Fgd3/Rab3ip/Ttyh1
GO:0006898	receptor-mediated endocytosis	0.0639008	16	Cacng2/Cav2/Dnm2/Egf/Ezr/Grk3/Hap1/Hip1/Hip1r/Hspg2/Lrp2/Nsf/Pip5k1c/Ramp1/Scrib/Tnk2
GO:0050954	sensory perception of mechanical stimulus	0.0639008	16	Atp6v0a4/Col11a2/Col1a1/Gjb2/Grin2b/Hpn/Kcnma1/Kcnq4/Lrp2/Mir711/Myo15/Pawr/Piezo2/Ush1c/Ush2a/Whrn
GO:0021782	glial cell development	0.0648409	8	Adgrg6/Akt1/Eif2b5/Fgfr3/Id4/Omg/Sox4/Tenm4
GO:2000146	negative regulation of cell motility	0.0648509	18	Abhd2/Abr/Adgrb1/Akt1/Angpt4/Cnn2/Dab2ip/Drd5/Ldlrad4/Notch1/Pin1/Ptk2/Ptprm/Ptprr/Ptprt/Slamf8/Srgap1/Sulf1
GO:0034330	cell junction organization	0.0649701	19	Actn1/Arvcf/Bcas3/Cldn5/Ctnnb1/Gjb2/Heg1/Kifc3/Lims1/Mtss1/Nphp4/Pard6a/Ptk2/Rapgef2/Rassf8/Snai1/Tns1/Trpv4/Whrn
GO:0055067	monovalent inorganic cation homeostasis	0.0656951	11	Anpep/Atp1a3/Atp6v0a2/Atp6v0a4/Kcnma1/Slamf8/Slc4a11/Slc4a5/Slc9a1/Slc9a8/Slc9a9
GO:0099072	regulation of postsynaptic membrane neurotransmitter receptor levels	0.0660728	9	Cacng2/Camk2a/Dnm2/Drd5/Grip1/Hap1/Nptxr/Pip5k1c/Scrib
GO:0043112	receptor metabolic process	0.0661624	15	Becn1/Cacng2/Caml/Dnm2/Egf/Ezr/Grk3/Hap1/Nsf/Pheta1/Pik3r4/Pip5k1c/Ramp1/Rnf43/Scrib
GO:0048706	embryonic skeletal system development	0.0662447	10	Bmp7/Chst11/Col1a1/Ctnnb1/Dscaml1/Hspg2/Mthfd1l/Slc39a3/Sulf1/Xylt1
GO:0007411	axon guidance	0.0674922	17	Apbb2/Artn/Bmp7/Cdk5r1/Celsr3/Dscam/Dscaml1/Efna4/Ispd/Matn2/Nr4a3/Nrcam/Ntn1/Plxna4/Plxnc1/Ptprm/Wnt7b
GO:0060350	endochondral bone morphogenesis	0.0675771	7	Cbs/Col13a1/Col1a1/Hspg2/Matn2/Poc1a/Trpv4
GO:0002228	natural killer cell mediated immunity	0.0683592	5	Crtam/Nectin2/Pik3r6/Stx11/Tap2
GO:0010596	negative regulation of endothelial cell migration	0.0683592	5	Adgrb1/Angpt4/Dab2ip/Notch1/Ptprm
GO:0042267	natural killer cell mediated cytotoxicity	0.0683592	5	Crtam/Nectin2/Pik3r6/Stx11/Tap2
GO:0042273	ribosomal large subunit biogenesis	0.0683592	5	Nvl/Ppan/Rpl10l/Rpl7a/Traf7
GO:0050854	regulation of antigen receptor-mediated signaling pathway	0.0683592	5	Cmtm3/Ezr/Malt1/Nectin2/Pawr
GO:0061028	establishment of endothelial barrier	0.0683592	5	Cldn5/Ctnnb1/Ezr/Rapgef2/Wnt7b
GO:0099590	neurotransmitter receptor internalization	0.0683592	5	Cacng2/Dnm2/Hap1/Pip5k1c/Scrib
GO:0010560	positive regulation of glycoprotein biosynthetic process	0.0689358	3	Ctnnb1/Pawr/Ramp1
GO:0010758	regulation of macrophage chemotaxis	0.0689358	3	Cxcl17/Slamf8/Trpv4
GO:0030033	microvillus assembly	0.0689358	3	Podxl/Rap1gap/Rapgef2
GO:0030204	chondroitin sulfate metabolic process	0.0689358	3	Chst11/Egflam/Xylt1
GO:0044851	hair cycle phase	0.0689358	3	Akt1/Ctnnb1/Notch1
GO:0045603	positive regulation of endothelial cell differentiation	0.0689358	3	Cldn5/Ctnnb1/Notch1
GO:0048715	negative regulation of oligodendrocyte differentiation	0.0689358	3	Ctnnb1/Id4/Notch1
GO:0060972	left/right pattern formation	0.0689358	3	Nme7/Notch1/Snai1
GO:0086012	membrane depolarization during cardiac muscle cell action potential	0.0689358	3	Cacna1c/Cacna1g/Cacnb2
GO:0098655	cation transmembrane transport	0.0689753	40	Atp1a3/Atp6v0a2/Atp6v0a4/Atp6v0b/Cacna1c/Cacna1g/Cacnb2/Cacng2/Cbarp/Cracr2a/Dnm2/Dpp6/Epo/Fxyd2/Grin2a/Grin2b/Hap1/Hpn/Hrh1/Htt/Kcnma1/Kcnn2/Kcnq4/Otop1/Pawr/Pkd2l1/Rhd/Shank2/Slc24a2/Slc25a37/Slc39a13/Slc39a3/Slc4a11/Slc8a2/Slc9a1/Slc9a8/Slc9a9/Stac/Tlr9/Trpv4
GO:0033674	positive regulation of kinase activity	0.0690422	28	Adam8/Adam9/Ccnd3/Cdk5r1/Cxcl17/Dab2ip/Egf/Epo/Fgfr3/Ghrl/Grm4/Lpar2/Malt1/Map2k6/Map3k1/Map3k4/Mapre3/Mst1r/Nek6/Pik3r4/Pik3r6/Ptk2/Ptpn11/Rapgef2/Tlr9/Traf2/Traf7/Wnt7b
GO:0032663	regulation of interleukin-2 production	0.069142	6	Card11/Carmil2/Ezr/Homer3/Malt1/Traf2
GO:0051129	negative regulation of cellular component organization	0.069269	41	Aatk/Adcy6/Add2/Akt1/Antxr1/Asap1/Atad2b/Bcas3/Becn1/Bmp7/Capg/Carmil2/Cdk5r1/Cdk5rap2/Chmp4b/Clec16a/Cnn2/Dnm2/Ercc4/Fgfr3/Fhod3/Fzd9/Grin2b/H2afy/Hip1r/Kdm4b/Ldlrad4/Notch1/Ntm/Ntn1/Ptk2/Rab3ip/Rap1gap/Rapgef2/Rps6ka2/Tbc1d30/Trpv4/Usp30/Vil1/Xylt1/Zfp207
GO:0031345	negative regulation of cell projection organization	0.0694607	15	Aatk/Adcy6/Asap1/Cdk5r1/Dnm2/Grin2b/Ntm/Ntn1/Ptk2/Rab3ip/Rap1gap/Rapgef2/Tbc1d30/Trpv4/Xylt1
GO:0097485	neuron projection guidance	0.0705669	17	Apbb2/Artn/Bmp7/Cdk5r1/Celsr3/Dscam/Dscaml1/Efna4/Ispd/Matn2/Nr4a3/Nrcam/Ntn1/Plxna4/Plxnc1/Ptprm/Wnt7b
GO:0035148	tube formation	0.0718972	14	Bcas3/Bmp7/Celsr1/Ctnnb1/Dab2ip/Fzd6/Lrp2/Mthfd1l/Notch1/Phactr4/Scrib/Sdccag8/Sox4/Tgif1
GO:1902115	regulation of organelle assembly	0.0718972	14	Asap1/Becn1/Cdk5rap2/Chmp4b/Dnm2/Ezr/Hap1/Htt/Kctd17/Lrrc4b/Nptxr/Palld/Tbc1d14/Tbc1d30
GO:0003209	cardiac atrium morphogenesis	0.0719191	4	Heg1/Notch1/Sox4/Zfpm1
GO:0006721	terpenoid metabolic process	0.0719191	4	Crabp2/Dhrs3/Fdft1/Plb1
GO:0060317	cardiac epithelial to mesenchymal transition	0.0719191	4	Erg/Notch1/Snai1/Wnt16
GO:0035296	regulation of tube diameter	0.0723723	12	Adcy6/Akt1/Cacna1c/Cacna1g/Casr/Drd5/Hrh1/Kcnma1/Manf/Ptk2/Ptprm/Rap1gds1
GO:0097746	regulation of blood vessel diameter	0.0723723	12	Adcy6/Akt1/Cacna1c/Cacna1g/Casr/Drd5/Hrh1/Kcnma1/Manf/Ptk2/Ptprm/Rap1gds1
GO:0007187	G protein-coupled receptor signaling pathway, coupled to cyclic nucleotide second messenger	0.0728665	15	Adcy6/Adgrb1/Adgrg6/Adgrl2/Casr/Chrm4/Drd5/Gna11/Grm4/Hrh1/Oxgr1/Psapl1/Ramp1/Rapgef2/Sstr5
GO:0048524	positive regulation of viral process	0.073417	7	Cav2/Chmp4b/Hpn/Jun/Mvb12b/Notch1/Nr5a2
GO:1901699	cellular response to nitrogen compound	0.0735472	33	Adcy6/Akt1/Atp1a3/Camk2a/Casp6/Cav2/Ccnd3/Cdk5r1/Chrm4/Col1a1/Ctnnb1/Dnm2/Dnmt3a/Drd5/Ezr/Grb14/Grin2a/Hrh1/Ly6h/Mir122/Mirlet7i/Nr4a3/Nsmce3/Otop1/Ptk2/Ptpn11/Rapgef2/Slc9a1/Smarcc1/Srebf1/Stxbp4/Tlr9/Traf2
GO:0030855	epithelial cell differentiation	0.0747341	35	Bmp7/Cldn5/Col18a1/Ctnnb1/Cux1/Deup1/Ezr/Fgfr3/H2afy/Heg1/Hsd17b4/Jun/Kazn/Kcnma1/Map3k1/Mtss1/Ncor2/Notch1/Nr5a2/Palld/Ppl/Psapl1/Rapgef2/Rxra/Sav1/Scrib/Six3/Slc4a5/Sox4/Tbx3/Ush1c/Ush2a/Whrn/Wnt16/Wnt7b
GO:0040013	negative regulation of locomotion	0.0755325	21	Abhd2/Abr/Adgrb1/Akt1/Angpt4/Cnn2/Dab2ip/Drd5/Ghrl/Ldlrad4/Notch1/Pin1/Ptk2/Ptprm/Ptprr/Ptprt/Slamf8/Srgap1/St6gal1/Sulf1/Trim8
GO:0007254	JNK cascade	0.0755464	14	Akt1/Casr/Cbs/Dab2ip/Map3k1/Map3k4/Mecom/Ptk2/Tlr9/Tnfrsf19/Traf2/Trpv4/Wnt16/Wnt7b
GO:0048568	embryonic organ development	0.0756568	30	Abr/Akt1/Bmp7/Bptf/Celsr1/Chst11/Ctnnb1/Dscaml1/Fzd6/Hpn/Hspg2/Kcnq4/Mthfd1l/Myo15/Notch1/Nr4a3/Ntn1/Otop1/Phactr4/Phlda2/Scrib/Six3/Slc39a3/Snai1/T2/Tbx3/Ush1c/Whrn/Wnt7b/Zfpm1
GO:0043627	response to estrogen	0.075855	6	Bcas3/Ctnnb1/Ghrl/Kcnma1/Ocstamp/Zfp366
GO:0003382	epithelial cell morphogenesis	0.076165	5	Col18a1/Heg1/Map3k1/Palld/Scrib
GO:0010613	positive regulation of cardiac muscle hypertrophy	0.076165	5	Becn1/Nr4a3/Pin1/Ptk2/Slc9a1
GO:0014742	positive regulation of muscle hypertrophy	0.076165	5	Becn1/Nr4a3/Pin1/Ptk2/Slc9a1
GO:0042440	pigment metabolic process	0.076165	5	Dct/Grk3/Iba57/Mthfd1l/Rapgef2
GO:0006909	phagocytosis	0.0764466	12	Abr/Adgrb1/Becn1/Cnn2/Dnm2/Dock1/Mertk/Myo18a/Pip5k1c/Ptk2/Rap1gap/Xkr8
GO:0051345	positive regulation of hydrolase activity	0.0765	31	Abr/Akt1/Antxr1/Asap1/Bcas3/Casr/Cav2/Dnal4/Dnm2/Dock8/Fgfr3/Grin2b/Hip1/Hip1r/Lims1/Mtch1/Mtcl1/Mtss1l/Pawr/Pin1/Ppargc1b/Rap1gap/Rap1gds1/Rapgef2/Rasgrp2/Rcn3/Scrib/Senp1/Tbc1d14/Tbc1d2/Tbc1d30
GO:0006790	sulfur compound metabolic process	0.0768402	16	Acpp/Cbs/Chst1/Chst11/Chst5/Chst8/Egflam/Gamt/Ggt5/Hsd17b4/Iba57/Icmt/Mical1/Pcyox1/Sulf1/Xylt1
GO:0030072	peptide hormone secretion	0.076901	18	Blk/Cacna1c/Casr/Ghrl/Hadh/Htt/Ica1/Mafa/Midn/Nadk/Oit1/Pim3/Ptpn11/Sox4/Srebf1/Sstr5/Stxbp4/Trpv4
GO:0030336	negative regulation of cell migration	0.0769951	17	Abhd2/Abr/Adgrb1/Akt1/Angpt4/Cnn2/Dab2ip/Drd5/Ldlrad4/Notch1/Ptk2/Ptprm/Ptprr/Ptprt/Slamf8/Srgap1/Sulf1
GO:0040017	positive regulation of locomotion	0.077305	36	Adam8/Adam9/Akt1/Aldoa/Angpt4/Artn/Bcas3/Bmp7/Capn7/Carmil2/Casr/Cav2/Chmp4b/Col18a1/Col1a1/Cxcl17/Dab2ip/Dock1/Dock8/Dscam/Egf/Fam89b/Il6st/Jun/Lgr6/Mylk/Notch1/Nr4a3/Ntn1/Pawr/Ptk2/Rapgef2/Snai1/Trpv4/Vil1/Wnt5b
GO:0051783	regulation of nuclear division	0.0781668	13	Becn1/Bmp7/Bora/Ccnd3/Ccnj/Cdk5rap2/Chmp4b/Egf/Fgfr3/H2afy/Nek6/Rps6ka2/Zfp207
GO:0030326	embryonic limb morphogenesis	0.0783952	11	Bmp7/Cacna1c/Chst11/Crabp2/Ctnnb1/Frem2/Fzd6/Mecom/Notch1/Tbx3/Zbtb16
GO:0035113	embryonic appendage morphogenesis	0.0783952	11	Bmp7/Cacna1c/Chst11/Crabp2/Ctnnb1/Frem2/Fzd6/Mecom/Notch1/Tbx3/Zbtb16
GO:0045860	positive regulation of protein kinase activity	0.0786357	26	Adam8/Adam9/Ccnd3/Cdk5r1/Cxcl17/Dab2ip/Egf/Epo/Ghrl/Grm4/Lpar2/Malt1/Map2k6/Map3k1/Map3k4/Mapre3/Mst1r/Nek6/Pik3r6/Ptk2/Ptpn11/Rapgef2/Tlr9/Traf2/Traf7/Wnt7b
GO:0043549	regulation of kinase activity	0.078735	41	Adam8/Adam9/Akt1/Bmp7/Camk2n1/Cbs/Ccnd3/Ccnj/Cdk5r1/Cxcl17/Dab2ip/Drd5/Dusp16/Egf/Epo/Fgfr3/Ghrl/Grm4/H2afy/Htt/Lpar2/Malt1/Map2k6/Map3k1/Map3k4/Mapre3/Midn/Mst1r/Nek6/Pik3r4/Pik3r6/Ppp2r5a/Ptk2/Ptpn11/Ptprt/Rapgef2/Slamf8/Tlr9/Traf2/Traf7/Wnt7b
GO:0003208	cardiac ventricle morphogenesis	0.0795455	7	Ctnnb1/Epo/Heg1/Lrp2/Notch1/Rxra/Sox4
GO:0048738	cardiac muscle tissue development	0.0801314	18	Bmp7/Ctnnb1/Epo/Fhod3/Heg1/Hspg2/Lrp2/Myo18b/Myom3/Nebl/Notch1/Pin1/Rxra/Sav1/Slc9a1/Tbx3/Tenm4/Zfpm1
GO:0048259	regulation of receptor-mediated endocytosis	0.0809107	9	Dnm2/Egf/Hap1/Hip1/Hip1r/Nsf/Pip5k1c/Scrib/Tnk2
GO:0003151	outflow tract morphogenesis	0.0809456	8	Bmp7/Ctnnb1/Dhrs3/Jun/Lrp2/Notch1/Tbx3/Zfpm1
GO:0046888	negative regulation of hormone secretion	0.0809456	8	Ghrl/Hadh/Il11/Midn/Oit1/Pim3/Ptpn11/Srebf1
GO:0060359	response to ammonium ion	0.0809456	8	Casp6/Cdk5r1/Chrm4/Dnm2/Drd5/Hrh1/Ly6h/Sdk1
GO:0009268	response to pH	0.0817576	4	Gna11/Kcnma1/Pkd2l1/Slc9a1
GO:0010824	regulation of centrosome duplication	0.0817576	4	Cdk5rap2/Cep131/Chmp4b/Poc1a
GO:0044848	biological phase	0.0817576	4	Akt1/Ctnnb1/Nfatc1/Notch1
GO:0000027	ribosomal large subunit assembly	0.081871	3	Ppan/Rpl10l/Traf7
GO:0000423	mitophagy	0.081871	3	Becn1/Clec16a/Usp30
GO:0002691	regulation of cellular extravasation	0.081871	3	Abr/Adam8/Pawr
GO:0021801	cerebral cortex radial glia guided migration	0.081871	3	Cdk5r1/Ctnnb1/Dab2ip
GO:0022030	telencephalon glial cell migration	0.081871	3	Cdk5r1/Ctnnb1/Dab2ip
GO:0030540	female genitalia development	0.081871	3	Lrp2/Mertk/Tbx3
GO:0042219	cellular modified amino acid catabolic process	0.081871	3	Ggt5/Pcyox1/Sardh
GO:0044550	secondary metabolite biosynthetic process	0.081871	3	Cbs/Dct/Rapgef2
GO:0070977	bone maturation	0.081871	3	Fgfr3/Rflna/Xylt1
GO:0071467	cellular response to pH	0.081871	3	Gna11/Pkd2l1/Slc9a1
GO:0095500	acetylcholine receptor signaling pathway	0.081871	3	Cdk5r1/Chrm4/Ly6h
GO:1903020	positive regulation of glycoprotein metabolic process	0.081871	3	Ctnnb1/Pawr/Ramp1
GO:1903831	signal transduction involved in cellular response to ammonium ion	0.081871	3	Cdk5r1/Chrm4/Ly6h
GO:1905144	response to acetylcholine	0.081871	3	Cdk5r1/Chrm4/Ly6h
GO:1905145	cellular response to acetylcholine	0.081871	3	Cdk5r1/Chrm4/Ly6h
GO:1905521	regulation of macrophage migration	0.081871	3	Cxcl17/Slamf8/Trpv4
GO:0043410	positive regulation of MAPK cascade	0.0835481	31	Adam8/Adam9/Cav2/Ctnnb1/Cxcl17/Dab2ip/Egf/Epo/Fgfr3/Fgfr4/Ghrl/Grm4/Il11/Jun/Lpar2/Map2k6/Map3k1/Map3k4/Mertk/Mst1r/Notch1/Pik3r6/Ptpn11/Rapgef2/Tlr9/Tnfrsf19/Traf2/Traf7/Trpv4/Wnt16/Wnt7b
GO:0006720	isoprenoid metabolic process	0.0844307	5	Crabp2/Dhrs3/Fdft1/Ispd/Plb1
GO:0043550	regulation of lipid kinase activity	0.0844307	5	Dab2ip/Fgfr3/Pik3r4/Pik3r6/Ppp2r5a
GO:0009062	fatty acid catabolic process	0.0859618	7	Abcd2/Abhd2/Acsbg2/Akt1/Etfa/Hadh/Hsd17b4
GO:0045778	positive regulation of ossification	0.0862701	9	Bmp7/Cebpd/Ctnnb1/Fgfr3/Fzd9/Id4/Il6st/Wnt7b/Zbtb16
GO:0007188	adenylate cyclase-modulating G protein-coupled receptor signaling pathway	0.0872071	14	Adcy6/Adgrb1/Adgrg6/Adgrl2/Casr/Chrm4/Drd5/Gna11/Grm4/Oxgr1/Psapl1/Ramp1/Rapgef2/Sstr5
GO:0007264	small GTPase mediated signal transduction	0.0877962	30	Aatk/Abr/Arhgap26/Arhgef3/Arhgef4/Celsr1/Dab2ip/Dnm2/Dock1/Dock8/Epo/Farp1/Fgd3/Icmt/Jun/Lpar2/Notch1/Ntn1/Obscn/Phactr4/Psd/Rab37/Rab44/Rap1gap/Rapgef2/Rasa4/Rasgrp2/Rgl2/Rtkn/Srgap1
GO:0035567	non-canonical Wnt signaling pathway	0.0903459	6	Ankrd6/Celsr1/Celsr3/Fzd6/Fzd9/Wnt7b
GO:0002715	regulation of natural killer cell mediated immunity	0.0922205	4	Crtam/Nectin2/Pik3r6/Tap2
GO:0032743	positive regulation of interleukin-2 production	0.0922205	4	Card11/Carmil2/Malt1/Traf2
GO:0042255	ribosome assembly	0.0922205	4	Ppan/Rpl10l/Rps15/Traf7
GO:0042269	regulation of natural killer cell mediated cytotoxicity	0.0922205	4	Crtam/Nectin2/Pik3r6/Tap2
GO:0086065	cell communication involved in cardiac conduction	0.0922205	4	Cacna1c/Cacna1g/Cacnb2/Kcnn2
GO:0090279	regulation of calcium ion import	0.0922205	4	Casr/Ctnnb1/Egf/Pawr
GO:0098884	postsynaptic neurotransmitter receptor internalization	0.0922205	4	Dnm2/Hap1/Pip5k1c/Scrib
GO:0140239	postsynaptic endocytosis	0.0922205	4	Dnm2/Hap1/Pip5k1c/Scrib
GO:1903146	regulation of autophagy of mitochondrion	0.0922205	4	Clec16a/Htt/Srebf1/Usp30
GO:2000108	positive regulation of leukocyte apoptotic process	0.0922205	4	Adam8/Fnip1/Nr4a3/Rapgef2
GO:0018958	phenol-containing compound metabolic process	0.092664	7	Cyp2d22/Dct/Grin2a/Hpn/Rapgef2/Slc5a5/Sncaip
GO:0019395	fatty acid oxidation	0.092664	7	Abcd2/Acsbg2/Akt1/Etfa/Hadh/Hsd17b4/Nr4a3
GO:0006022	aminoglycan metabolic process	0.0928865	8	B4galt7/Ccnd3/Chst1/Chst11/Chst5/Egf/Egflam/Xylt1
GO:0007098	centrosome cycle	0.0928865	8	Cdk5rap2/Cep131/Chmp4b/Ctnnb1/Deup1/Pard6a/Poc1a/Sdccag8
GO:0019226	transmission of nerve impulse	0.0928865	8	Cacna1g/Cacng2/Dpp6/Drd5/Ghrl/Kcnma1/Nrcam/Pawr
GO:0042310	vasoconstriction	0.0928865	8	Akt1/Cacna1c/Cacna1g/Casr/Drd5/Hrh1/Manf/Rap1gds1
GO:0051298	centrosome duplication	0.093148	5	Cdk5rap2/Cep131/Chmp4b/Deup1/Poc1a
GO:1903428	positive regulation of reactive oxygen species biosynthetic process	0.093148	5	Adgrb1/Akt1/Dnm2/Hrh1/Tlr5
GO:0023061	signal release	0.0936162	31	Blk/Cacna1c/Camk2a/Casr/Celsr1/Fgfr4/Ghrl/Grm4/Hadh/Htt/Ica1/Il11/Lrp2/Mafa/Midn/Nadk/Oit1/Pim3/Ppfia2/Ptpn11/Scrib/Sncaip/Sox4/Srebf1/Sstr5/Stx11/Stxbp4/Syt13/Syt6/Tbx3/Trpv4
GO:0007005	mitochondrion organization	0.0939956	25	Adgrg6/Afg3l1/Akt1/Atad3a/Bcs1l/Becn1/Camk2a/Cav2/Clec16a/Dap3/Fnip1/Hap1/Hip1r/Hspa4/Htt/Jun/Man2a1/Map3k1/Mcl1/Msto1/Nectin2/Slc4a5/Slc9a1/Srebf1/Usp30
GO:0007163	establishment or maintenance of cell polarity	0.0952875	16	Bcas3/Carmil2/Cdk5rap2/Dock8/Ezr/Fam89b/Frmd4a/Htt/Kif26b/Lims1/Mtcl1/Myo18a/Pard6a/Scrib/Sdccag8/Wnt7b
GO:0030177	positive regulation of Wnt signaling pathway	0.0952876	10	Ankrd6/Col1a1/Egf/Fgfr3/Fzd9/Lgr6/Pin1/Sox4/Sulf1/Tmem198
GO:0002115	store-operated calcium entry	0.0957588	3	Cracr2a/Homer3/Srl
GO:0018230	peptidyl-L-cysteine S-palmitoylation	0.0957588	3	Zdhhc12/Zdhhc22/Zdhhc3
GO:0018231	peptidyl-S-diacylglycerol-L-cysteine biosynthetic process from peptidyl-cysteine	0.0957588	3	Zdhhc12/Zdhhc22/Zdhhc3
GO:0030252	growth hormone secretion	0.0957588	3	Cacna1c/Ghrl/Ptpn11
GO:0032331	negative regulation of chondrocyte differentiation	0.0957588	3	Adamts12/Ctnnb1/Rflna
GO:0048311	mitochondrion distribution	0.0957588	3	Hap1/Msto1/Slc4a5
GO:0048485	sympathetic nervous system development	0.0957588	3	Ctnnb1/Plxna4/Sox4
GO:0051125	regulation of actin nucleation	0.0957588	3	Hip1r/Vil1/Wipf1
GO:1901071	glucosamine-containing compound metabolic process	0.0957588	3	Chst1/Chst5/Gfpt1
GO:1904353	regulation of telomere capping	0.0957588	3	Ercc4/Map3k4/Nek7
GO:0090066	regulation of anatomical structure size	0.0974567	34	Aatk/Adcy6/Add2/Akt1/Cacna1c/Cacna1g/Capg/Carmil2/Casr/Cbs/Cdk5r1/Crabp2/Dnm2/Drd5/Dscam/Ezr/Fhod3/Hip1r/Hrh1/Kcnma1/Limk1/Manf/Map3k1/Ntn1/Omg/Plxna4/Prkg2/Ptk2/Ptprm/Rap1gds1/Ush1c/Vil1/Wipf1/Wnt7b
GO:0030010	establishment of cell polarity	0.0975709	11	Bcas3/Cdk5rap2/Dock8/Fam89b/Frmd4a/Htt/Kif26b/Myo18a/Pard6a/Scrib/Sdccag8
GO:0043062	extracellular structure organization	0.0976154	18	Antxr1/Apbb2/Bmp7/Carmil2/Col11a2/Col13a1/Col18a1/Col1a1/Crispld2/Egflam/Fbln2/Fgfr4/Hpn/Hspg2/Loxl4/Notch1/Ptk2/Sulf1
GO:0010633	negative regulation of epithelial cell migration	0.0981159	6	Adgrb1/Angpt4/Dab2ip/Notch1/Ptprm/Ptprr
GO:0048168	regulation of neuronal synaptic plasticity	0.0981159	6	Camk2a/Drd5/Grin2a/Grin2b/Kcnn2/Slc8a2
GO:0035107	appendage morphogenesis	0.0989787	12	Bmp7/Cacna1c/Chst11/Crabp2/Ctnnb1/Frem2/Fzd6/Mecom/Notch1/Sox4/Tbx3/Zbtb16
GO:0035108	limb morphogenesis	0.0989787	12	Bmp7/Cacna1c/Chst11/Crabp2/Ctnnb1/Frem2/Fzd6/Mecom/Notch1/Sox4/Tbx3/Zbtb16
GO:0046879	hormone secretion	0.0991255	22	Blk/Cacna1c/Casr/Fgfr4/Ghrl/Hadh/Htt/Ica1/Il11/Lrp2/Mafa/Midn/Nadk/Oit1/Pim3/Ptpn11/Sox4/Srebf1/Sstr5/Stxbp4/Tbx3/Trpv4
GO:0002063	chondrocyte development	0.102307	5	Chst11/Matn2/Poc1a/Rflna/Sulf1
GO:0035306	positive regulation of dephosphorylation	0.102307	5	Camta1/Pawr/Pin1/Ppargc1b/Ppp2r5a
GO:1902017	regulation of cilium assembly	0.102307	5	Dnm2/Hap1/Htt/Kctd17/Tbc1d30
GO:0022612	gland morphogenesis	0.102766	11	Bmp7/Hpn/Id4/Lims1/Notch1/Ntn1/Rxra/Scrib/Sulf1/Tbx3/Tet2
GO:0007507	heart development	0.102965	37	Adgrg6/Bmp7/Cacna1c/Ctnnb1/Dhrs3/Dnm2/Epo/Erg/Fgfrl1/Fhod3/Frem2/Gna11/Heg1/Hspg2/Jun/Lrp2/Mecom/Mospd3/Myo18b/Myom3/Ncor2/Nebl/Nfatc1/Notch1/Pin1/Ptpn11/Rps6ka2/Rxra/Sav1/Slc9a1/Snai1/Sox4/Tbx3/Tenm4/Wnt16/Zfpm1/Zmiz1
GO:0001881	receptor recycling	0.103284	4	Caml/Nsf/Pheta1/Scrib
GO:0002711	positive regulation of T cell mediated immunity	0.103284	4	Malt1/Nectin2/Tap2/Traf2
GO:0003230	cardiac atrium development	0.103284	4	Heg1/Notch1/Sox4/Zfpm1
GO:0032594	protein transport within lipid bilayer	0.103284	4	Cacng2/Grip1/Reep2/Scrib
GO:0043277	apoptotic cell clearance	0.103284	4	Adgrb1/Becn1/Mertk/Xkr8
GO:0045839	negative regulation of mitotic nuclear division	0.103284	4	Bmp7/Cdk5rap2/Fgfr3/Zfp207
GO:0050856	regulation of T cell receptor signaling pathway	0.103284	4	Ezr/Malt1/Nectin2/Pawr
GO:0051973	positive regulation of telomerase activity	0.103284	4	Ctnnb1/Map3k4/Nek7/Nvl
GO:0060135	maternal process involved in female pregnancy	0.103284	4	Akt1/Cbs/Ghrl/Rxra
GO:0060292	long-term synaptic depression	0.103284	4	Drd5/Shank2/Slc24a2/Sorcs3
GO:0072583	clathrin-dependent endocytosis	0.103284	4	Dnm2/Hip1/Hip1r/Tnk2
GO:1902692	regulation of neuroblast proliferation	0.103284	4	Ctnnb1/Dct/Notch1/Six3
GO:0035303	regulation of dephosphorylation	0.103918	12	Camta1/Elfn1/Epm2a/Farp1/Hpn/Htt/Pawr/Pin1/Ppargc1b/Ppp1r27/Ppp2r5a/Ppp6r3
GO:2000027	regulation of animal organ morphogenesis	0.104433	14	Ankrd6/Bmp7/Casp6/Celsr1/Celsr3/Ctnnb1/Fgfr4/Fzd6/Hpn/Lims1/Notch1/Rxra/Sulf1/Wnt7b
GO:0043408	regulation of MAPK cascade	0.105048	41	Adam8/Adam9/Akt1/Bmp7/Camk2n1/Cav2/Cbs/Ctnnb1/Cxcl17/Dab2ip/Dusp16/Egf/Epo/Ezr/Fgfr3/Fgfr4/Ghrl/Grin2b/Grm4/Il11/Jun/Lpar2/Map2k6/Map3k1/Map3k4/Mecom/Mertk/Mst1r/Notch1/Pik3r6/Pin1/Ptpn11/Ptprr/Rapgef2/Tlr9/Tnfrsf19/Traf2/Traf7/Trpv4/Wnt16/Wnt7b
GO:0003170	heart valve development	0.106228	6	Erg/Fgfrl1/Nfatc1/Notch1/Sox4/Zfpm1
GO:0045670	regulation of osteoclast differentiation	0.106228	6	Adam8/Ctnnb1/Fgfr3/Ocstamp/Ppargc1b/Tmem178
GO:0034440	lipid oxidation	0.106915	7	Abcd2/Acsbg2/Akt1/Etfa/Hadh/Hsd17b4/Nr4a3
GO:0043393	regulation of protein binding	0.107587	16	Add2/Akt1/Amfr/Dab2ip/Fam192a/Hip1r/Hspa4/Ica1/Mapre3/Nvl/Phlda2/Pin1/Plcl1/Rapgef2/Traf2/Zfpm1
GO:0051346	negative regulation of hydrolase activity	0.107624	19	Akt1/Bcas3/Dab2ip/Elfn1/Epm2a/Farp1/Fnip1/Hpn/Htt/Ints1/Lxn/Mical1/Ppp1r27/Rasa4/Rffl/Sort1/Spink13/Tlr9/Wfdc1
GO:0090150	establishment of protein localization to membrane	0.10904	14	Cacng2/Cdk5r1/Chmp4b/Grip1/Hspa4/Mtcl1/Nsf/Rab3ip/Reep2/Scrib/Srp14/Zdhhc12/Zdhhc22/Zdhhc3
GO:0001764	neuron migration	0.109259	13	Apbb2/Camk2a/Cdk5r1/Celsr1/Celsr3/Ctnnb1/Dab2ip/Dclk1/Matn2/Ntn1/Ptk2/Rapgef2/Sdccag8
GO:0000289	nuclear-transcribed mRNA poly(A) tail shortening	0.110527	3	Pnldc1/Samd4/Tnrc6b
GO:0001556	oocyte maturation	0.110527	3	Dmc1/Grb14/Rps6ka2
GO:0002052	positive regulation of neuroblast proliferation	0.110527	3	Ctnnb1/Dct/Notch1
GO:0002320	lymphoid progenitor cell differentiation	0.110527	3	Fnip1/Notch1/Sox4
GO:0032369	negative regulation of lipid transport	0.110527	3	Akt1/Egf/Ptpn11
GO:0043628	ncRNA 3'-end processing	0.110527	3	Ints1/Ints7/Rps21
GO:0048857	neural nucleus development	0.110527	3	Cdk5r1/Fgfr3/Scrib
GO:0060438	trachea development	0.110527	3	Ctnnb1/Edaradd/Wnt7b
GO:1901976	regulation of cell cycle checkpoint	0.110527	3	Cdk5rap2/Thoc1/Wdr76
GO:0043588	skin development	0.111892	16	Akt1/Apcdd1/Celsr1/Col1a1/Ctnnb1/Edaradd/Fzd6/H2afy/Kazn/Notch1/Palld/Ppl/Sav1/Snai1/Tnfrsf19/Wnt16
GO:0010718	positive regulation of epithelial to mesenchymal transition	0.111895	5	Bmp7/Col1a1/Ctnnb1/Notch1/Snai1
GO:0008306	associative learning	0.112582	8	Atp1a3/Cacna1c/Drd5/Ghrl/Grin2a/Grin2b/Hrh1/Htt
GO:0022409	positive regulation of cell-cell adhesion	0.112963	15	Adam8/Bmp7/Card11/Carmil2/Dock8/Epo/Il6st/Kif26b/Malt1/Nr4a3/Pawr/Pik3r6/Rap1gap/Zbtb16/Zmiz1
GO:0051091	positive regulation of DNA-binding transcription factor activity	0.112963	15	Adam8/Akt1/Amh/Camk2a/Card11/Card14/Ctnnb1/Malt1/Ppargc1b/Rps6ka5/Sav1/Tlr9/Traf2/Trappc9/Trim8
GO:0009914	hormone transport	0.11299	22	Blk/Cacna1c/Casr/Fgfr4/Ghrl/Hadh/Htt/Ica1/Il11/Lrp2/Mafa/Midn/Nadk/Oit1/Pim3/Ptpn11/Sox4/Srebf1/Sstr5/Stxbp4/Tbx3/Trpv4
GO:0070588	calcium ion transmembrane transport	0.113216	18	Cacna1c/Cacna1g/Cacnb2/Cacng2/Cbarp/Cracr2a/Grin2a/Grin2b/Hap1/Htt/Pawr/Pkd2l1/Slc24a2/Slc8a2/Slc9a1/Stac/Tlr9/Trpv4
GO:0007605	sensory perception of sound	0.114224	13	Atp6v0a4/Col11a2/Col1a1/Gjb2/Hpn/Kcnma1/Kcnq4/Lrp2/Mir711/Myo15/Ush1c/Ush2a/Whrn
GO:0030216	keratinocyte differentiation	0.114457	7	H2afy/Kazn/Notch1/Palld/Ppl/Sav1/Wnt16
GO:0043123	positive regulation of I-kappaB kinase/NF-kappaB signaling	0.114457	7	Akt1/Card11/Ctnnb1/Tlr9/Tnfrsf19/Traf2/Trim8
GO:0043506	regulation of JUN kinase activity	0.114457	7	Cbs/Dab2ip/Map3k1/Map3k4/Tlr9/Traf2/Wnt7b
GO:0060563	neuroepithelial cell differentiation	0.114457	7	Cux1/Kcnma1/Notch1/Scrib/Sox4/Ush1c/Whrn
GO:0032272	negative regulation of protein polymerization	0.114676	6	Add2/Capg/Carmil2/Fhod3/Hip1r/Vil1
GO:0001937	negative regulation of endothelial cell proliferation	0.114922	4	Cav2/Ghrl/Ptprm/Sulf1
GO:0035307	positive regulation of protein dephosphorylation	0.114922	4	Camta1/Pawr/Pin1/Ppp2r5a
GO:0043551	regulation of phosphatidylinositol 3-kinase activity	0.114922	4	Dab2ip/Fgfr3/Pik3r4/Pik3r6
GO:0045123	cellular extravasation	0.114922	4	Abr/Adam8/Add2/Pawr
GO:0045429	positive regulation of nitric oxide biosynthetic process	0.114922	4	Akt1/Dnm2/Hrh1/Tlr5
GO:0045686	negative regulation of glial cell differentiation	0.114922	4	Ctnnb1/Fgfr3/Id4/Notch1
GO:0048599	oocyte development	0.114922	4	Ctnnb1/Dmc1/Grb14/Rps6ka2
GO:1904407	positive regulation of nitric oxide metabolic process	0.114922	4	Akt1/Dnm2/Hrh1/Tlr5
GO:0061564	axon development	0.116099	31	Aatk/Apbb2/Artn/Bmp7/Casp6/Cdk5r1/Celsr3/Crabp2/Dclk1/Dnm2/Dscam/Dscaml1/Efna4/Fgfr3/Ispd/Jun/Limk1/Matn2/Notch1/Nr4a3/Nrcam/Ntn1/Omg/Pip5k1c/Plxna4/Plxnc1/Ptk2/Ptpn11/Ptprm/Wnt7b/Xylt1
GO:0010639	negative regulation of organelle organization	0.116636	22	Add2/Akt1/Atad2b/Becn1/Bmp7/Capg/Carmil2/Cdk5rap2/Chmp4b/Clec16a/Dnm2/Ercc4/Fgfr3/Fhod3/H2afy/Hip1r/Kdm4b/Rps6ka2/Tbc1d30/Usp30/Vil1/Zfp207
GO:0060828	regulation of canonical Wnt signaling pathway	0.117581	15	Ankrd6/Col1a1/Dab2ip/Egf/Fgfr3/Fzd6/Fzd9/Jade1/Kremen1/Notch1/Nphp4/Pin1/Sox4/Tmem198/Wnt5b
GO:0090276	regulation of peptide hormone secretion	0.118613	14	Blk/Casr/Ghrl/Hadh/Ica1/Midn/Nadk/Oit1/Pim3/Ptpn11/Sox4/Srebf1/Sstr5/Stxbp4
GO:0045216	cell-cell junction organization	0.119307	11	Arvcf/Cldn5/Gjb2/Heg1/Kifc3/Lims1/Nphp4/Pard6a/Snai1/Trpv4/Whrn
GO:1901617	organic hydroxy compound biosynthetic process	0.11932	13	Cyp2d22/Dct/Fdft1/Fgfr4/Htt/Ippk/Lbr/Pcbd2/Pts/Rapgef2/Snai1/Srebf1/Tm7sf2
GO:0007611	learning or memory	0.119482	19	Atp1a3/Cacna1c/Cntnap2/Drd5/Epm2a/Fzd9/Ghrl/Grin2a/Grin2b/Grm4/Hrh1/Htt/Jun/Ntan1/Shank2/Slc24a2/Slc6a1/Slc8a2/Sorcs3
GO:0007265	Ras protein signal transduction	0.119771	25	Aatk/Abr/Arhgef3/Arhgef4/Celsr1/Dab2ip/Dnm2/Epo/Farp1/Fgd3/Icmt/Jun/Lpar2/Notch1/Ntn1/Obscn/Phactr4/Psd/Rab37/Rab44/Rapgef2/Rasa4/Rgl2/Rtkn/Srgap1
GO:0002064	epithelial cell development	0.120811	16	Cldn5/Col18a1/Ctnnb1/Ezr/Fgfr3/Heg1/Hsd17b4/Map3k1/Notch1/Palld/Rapgef2/Scrib/Six3/Slc4a5/Whrn/Wnt7b
GO:0031098	stress-activated protein kinase signaling cascade	0.121555	18	Akt1/Casr/Cbs/Dab2ip/Ezr/Fgfr3/Map2k6/Map3k1/Map3k4/Mecom/Nek6/Ptk2/Tlr9/Tnfrsf19/Traf2/Trpv4/Wnt16/Wnt7b
GO:0033047	regulation of mitotic sister chromatid segregation	0.121898	5	Becn1/Cdk5rap2/H2afy/Nek6/Zfp207
GO:0044380	protein localization to cytoskeleton	0.121898	5	Cep131/Htt/Mapre3/Pard6a/Rtkn
GO:0048806	genitalia development	0.121898	5	Ctnnb1/Lrp2/Mertk/Ptpn11/Tbx3
GO:0097720	calcineurin-mediated signaling	0.121898	5	Camta1/Homer3/Nfatc1/Nr5a2/Slc9a1
GO:1905515	non-motile cilium assembly	0.121898	5	Cep131/Dnm2/Hap1/Htt/Poc1a
GO:0048704	embryonic skeletal system morphogenesis	0.122269	7	Bmp7/Chst11/Ctnnb1/Dscaml1/Hspg2/Mthfd1l/Slc39a3
GO:0031589	cell-substrate adhesion	0.122845	21	Actn1/Adam8/Adam9/Adamts12/Antxr1/Bcas3/Col13a1/Col1a1/Ctnnb1/Dnm2/Dock1/Egflam/Fbln2/Itga11/Lims1/Mertk/Notch1/Plekha2/Ptk2/St6gal1/Ttyh1
GO:0001578	microtubule bundle formation	0.123451	6	Cdk5rap2/Cep131/Dnah8/Mtcl1/Nckap5/Tekt2
GO:0007405	neuroblast proliferation	0.123451	6	Ctnnb1/Dct/Fzd9/Id4/Notch1/Six3
GO:0030512	negative regulation of transforming growth factor beta receptor signaling pathway	0.123451	6	Cav2/Chst11/Dnm2/Fam89b/Ldlrad4/Pin1
GO:0034754	cellular hormone metabolic process	0.123451	6	Crabp2/Cyp2d22/Dhrs3/Hsd17b4/Kcnma1/Plb1
GO:0043507	positive regulation of JUN kinase activity	0.123451	6	Dab2ip/Map3k1/Map3k4/Tlr9/Traf2/Wnt7b
GO:0048645	animal organ formation	0.123451	6	Bmp7/Ctnnb1/Fgfr4/Lrp2/Notch1/Sulf1
GO:1904377	positive regulation of protein localization to cell periphery	0.123451	6	Akt1/Cacng2/Dpp6/Ezr/Stac/Vil1
GO:0007420	brain development	0.124417	37	Aatk/Abr/Adgrl2/Bmp7/Bptf/Cbs/Cdk5r1/Cdk5rap2/Cntnap2/Ctnnb1/Dab2ip/Dclk1/Dct/Dscaml1/Egf/Fgfr3/Fzd6/Hap1/Hspg2/Htt/Id4/Lrp2/Mecom/Ncor2/Nme7/Notch1/Nr4a3/Plxna4/Ptpn11/Rapgef2/Scrib/Shank2/Six3/Tbx3/Trappc9/Whrn/Wnt7b
GO:0031623	receptor internalization	0.124434	10	Cacng2/Dnm2/Egf/Ezr/Grk3/Hap1/Nsf/Pip5k1c/Ramp1/Scrib
GO:0072089	stem cell proliferation	0.124434	10	Ctnnb1/Dct/Fzd9/Id4/Mecom/Nfatc1/Notch1/Rnf43/Six3/Tbx3
GO:0009306	protein secretion	0.125344	31	Adam9/Blk/Cacna1c/Card11/Carmil2/Casr/Crtam/Egf/Ezr/Ghrl/Hadh/Htt/Ica1/Mafa/Midn/Myo18a/Nadk/Notch1/Oit1/Pim3/Ptpn11/Rcn3/Rhbdf1/Sox4/Srebf1/Sstr5/Stxbp4/Tlr5/Tlr9/Traf2/Trpv4
GO:0001893	maternal placenta development	0.126101	3	Akt1/Ghrl/Rxra
GO:0003272	endocardial cushion formation	0.126101	3	Bmp7/Notch1/Snai1
GO:0009112	nucleobase metabolic process	0.126101	3	Acpp/Mthfd1l/Tet2
GO:0032212	positive regulation of telomere maintenance via telomerase	0.126101	3	Ctnnb1/Map3k4/Nek7
GO:0045815	positive regulation of gene expression, epigenetic	0.126101	3	Atad2b/Ctnnb1/H2afy
GO:0046320	regulation of fatty acid oxidation	0.126101	3	Abcd2/Akt1/Nr4a3
GO:0050654	chondroitin sulfate proteoglycan metabolic process	0.126101	3	Chst11/Egflam/Xylt1
GO:0060143	positive regulation of syncytium formation by plasma membrane fusion	0.126101	3	Adam9/Adgrb1/Ocstamp
GO:0099149	regulation of postsynaptic neurotransmitter receptor internalization	0.126101	3	Hap1/Pip5k1c/Scrib
GO:0099632	protein transport within plasma membrane	0.126101	3	Cacng2/Grip1/Scrib
GO:0099637	neurotransmitter receptor transport	0.126101	3	Cacng2/Grip1/Scrib
GO:1903204	negative regulation of oxidative stress-induced neuron death	0.126101	3	Ctnnb1/Nr4a3/Tldc1
GO:1903306	negative regulation of regulated secretory pathway	0.126101	3	Abr/Cbarp/Notch1
GO:1905809	negative regulation of synapse organization	0.126101	3	Fzd9/Grin2b/Ptk2
GO:2000785	regulation of autophagosome assembly	0.126101	3	Becn1/Chmp4b/Tbc1d14
GO:0097756	negative regulation of blood vessel diameter	0.126874	8	Akt1/Cacna1c/Cacna1g/Casr/Drd5/Hrh1/Manf/Rap1gds1
GO:0030866	cortical actin cytoskeleton organization	0.127104	4	Ezr/Rtkn/Vil1/Wipf1
GO:0046148	pigment biosynthetic process	0.127104	4	Dct/Iba57/Mthfd1l/Rapgef2
GO:0030278	regulation of ossification	0.127146	15	Bmp7/Cebpd/Ctnnb1/Dhrs3/Fgfr3/Fzd9/Id4/Il6st/Kremen1/Nfatc1/Notch1/Ptk2/Rflna/Wnt7b/Zbtb16
GO:0051048	negative regulation of secretion	0.127146	15	Abr/Anpep/Cbarp/Egf/Ezr/Ghrl/Hadh/Il11/Midn/Notch1/Oit1/Pim3/Ptpn11/Rhbdf1/Srebf1
GO:0060348	bone development	0.127146	15	Cbs/Col13a1/Col1a1/Dhrs3/Fgfr3/Ghrl/Hspg2/Matn2/Poc1a/Ptpn11/Rflna/Sulf1/Trpv4/Xylt1/Zfpm1
GO:0048598	embryonic morphogenesis	0.127283	37	Abr/Bmp7/Cacna1c/Celsr1/Chst11/Crabp2/Ctnnb1/Dscaml1/Frem2/Fzd6/Hpn/Hspg2/Htt/Kcnq4/Lrp2/Mecom/Mthfd1l/Myo15/Notch1/Nr4a3/Ntn1/Otop1/Phactr4/Scrib/Six3/Slc39a3/Snai1/Sox4/Sulf1/T2/Tbx3/Tenm4/Tgif1/Ush1c/Whrn/Wnt7b/Zbtb16
GO:0003158	endothelium development	0.129508	9	Adamts12/Cldn5/Col18a1/Ctnnb1/Ezr/Heg1/Notch1/Rapgef2/Wnt7b
GO:0035966	response to topologically incorrect protein	0.129508	9	Amfr/Creb3l2/Dab2ip/Dnajb12/Fbxo6/Herpud2/Jkamp/Manf/Pacrg
GO:0060349	bone morphogenesis	0.129508	9	Cbs/Col13a1/Col1a1/Dhrs3/Fgfr3/Hspg2/Matn2/Poc1a/Trpv4
GO:0050803	regulation of synapse structure or activity	0.130251	18	Adgrb1/Adgrl2/Cdk5r1/Chmp4b/Cttnbp2/Dab2ip/Dnm2/Farp1/Fzd9/Ghrl/Grin2b/Lrrc4b/Nptxr/Nrcam/Ntn1/Ptk2/Shank2/Ube2v2
GO:0051592	response to calcium ion	0.13079	10	Adam9/Casr/Htt/Jun/Kcnma1/Mylk/Rasa4/Rasgrp2/Syt13/Syt6
GO:0051271	negative regulation of cellular component movement	0.132098	19	Abhd2/Abr/Actn1/Adgrb1/Akt1/Angpt4/Cnn2/Dab2ip/Drd5/Ldlrad4/Notch1/Pin1/Ptk2/Ptprm/Ptprr/Ptprt/Slamf8/Srgap1/Sulf1
GO:0050982	detection of mechanical stimulus	0.132301	5	Grin2b/Hpn/Pawr/Piezo2/Pkd2l1
GO:0072132	mesenchyme morphogenesis	0.132301	5	Bmp7/Ctnnb1/Htt/Notch1/Snai1
GO:0045833	negative regulation of lipid metabolic process	0.132545	6	Akt1/Ccnc/Dab2ip/Hrh1/Ppp2r5a/Snai1
GO:0045859	regulation of protein kinase activity	0.133584	36	Adam8/Adam9/Akt1/Bmp7/Camk2n1/Cbs/Ccnd3/Ccnj/Cdk5r1/Cxcl17/Dab2ip/Drd5/Dusp16/Egf/Epo/Ghrl/Grm4/H2afy/Htt/Lpar2/Malt1/Map2k6/Map3k1/Map3k4/Mapre3/Mst1r/Nek6/Pik3r6/Ptk2/Ptpn11/Ptprt/Rapgef2/Tlr9/Traf2/Traf7/Wnt7b
GO:0042063	gliogenesis	0.13647	19	Adgrg6/Akt1/Apcdd1/Cdk5r1/Ctnnb1/Dab2ip/Eif2b5/Fgfr3/Id4/Il6st/Lrp2/Matn2/Notch1/Omg/Ptk2/Ptpn11/Scrib/Sox4/Tenm4
GO:0051963	regulation of synapse assembly	0.136479	9	Adgrb1/Adgrl2/Farp1/Ghrl/Lrrc4b/Nptxr/Ntn1/Ptk2/Ube2v2
GO:0050708	regulation of protein secretion	0.137905	25	Adam9/Blk/Carmil2/Casr/Crtam/Egf/Ezr/Ghrl/Hadh/Ica1/Midn/Myo18a/Nadk/Oit1/Pim3/Ptpn11/Rhbdf1/Sox4/Srebf1/Sstr5/Stxbp4/Tlr5/Tlr9/Traf2/Trpv4
GO:0014009	glial cell proliferation	0.139801	4	Ctnnb1/Notch1/Ptk2/Sox4
GO:0021846	cell proliferation in forebrain	0.139801	4	Dct/Ncor2/Six3/Wnt7b
GO:0048710	regulation of astrocyte differentiation	0.139801	4	Fgfr3/Id4/Il6st/Notch1
GO:0071364	cellular response to epidermal growth factor stimulus	0.139801	4	Akt1/Dab2ip/Ptpn11/Vil1
GO:0051668	localization within membrane	0.140983	13	Cacng2/Camk2a/Dnm2/Fzd9/Grin2b/Grip1/Hap1/Nme7/Nptxr/Pip5k1c/Reep2/Scrib/Zdhhc3
GO:0072657	protein localization to membrane	0.141742	31	Adcy6/Akt1/Cacnb2/Cacng2/Camk2a/Cdk5r1/Chmp4b/Dpp6/Ezr/Fzd9/Grin2a/Grin2b/Grip1/Hspa4/Mtcl1/Nme7/Nptxr/Nsf/Ppp2r5a/Prkg2/Rab3ip/Ramp1/Rapgef2/Reep2/Scrib/Srp14/Stac/Vil1/Zdhhc12/Zdhhc22/Zdhhc3
GO:0005977	glycogen metabolic process	0.141948	6	Akt1/Epm2a/Gfpt1/Il6st/Phlda2/Pygl
GO:0006073	cellular glucan metabolic process	0.141948	6	Akt1/Epm2a/Gfpt1/Il6st/Phlda2/Pygl
GO:0006970	response to osmotic stress	0.141948	6	Epo/Kcnma1/Mylk/Prkg2/Relb/Trpv4
GO:0044042	glucan metabolic process	0.141948	6	Akt1/Epm2a/Gfpt1/Il6st/Phlda2/Pygl
GO:1903845	negative regulation of cellular response to transforming growth factor beta stimulus	0.141948	6	Cav2/Chst11/Dnm2/Fam89b/Ldlrad4/Pin1
GO:0006986	response to unfolded protein	0.142059	8	Amfr/Creb3l2/Dab2ip/Fbxo6/Herpud2/Jkamp/Manf/Pacrg
GO:0043502	regulation of muscle adaptation	0.142059	8	Becn1/Nfatc1/Notch1/Nr4a3/Pin1/Ptk2/Slc9a1/Srl
GO:1905477	positive regulation of protein localization to membrane	0.142059	8	Akt1/Cacng2/Cdk5r1/Dpp6/Ezr/Mtcl1/Stac/Vil1
GO:0045665	negative regulation of neuron differentiation	0.142112	17	Aatk/Adcy6/Asap1/Bmp7/Cdk5r1/Cdk5rap2/Disp3/Id4/Notch1/Ntm/Ntn1/Ptk2/Rap1gap/Rapgef2/Six3/Trpv4/Xylt1
GO:0030201	heparan sulfate proteoglycan metabolic process	0.142404	3	Ctnnb1/Sulf1/Xylt1
GO:0043276	anoikis	0.142404	3	Mcl1/Notch1/Ptk2
GO:0045724	positive regulation of cilium assembly	0.142404	3	Hap1/Htt/Kctd17
GO:0048799	animal organ maturation	0.142404	3	Fgfr3/Rflna/Xylt1
GO:0048820	hair follicle maturation	0.142404	3	Akt1/Ctnnb1/Notch1
GO:0055003	cardiac myofibril assembly	0.142404	3	Fhod3/Myom3/Nebl
GO:0060343	trabecula formation	0.142404	3	Adgrg6/Col1a1/Ppargc1b
GO:0060536	cartilage morphogenesis	0.142404	3	Matn2/Snai1/Wnt7b
GO:0060571	morphogenesis of an epithelial fold	0.142404	3	Bmp7/Ctnnb1/Sulf1
GO:0071539	protein localization to centrosome	0.142404	3	Cep131/Htt/Pard6a
GO:1902745	positive regulation of lamellipodium organization	0.142404	3	Carmil2/Dnm2/Vil1
GO:0001736	establishment of planar polarity	0.143089	5	Ankrd6/Celsr1/Celsr3/Fzd6/Wnt7b
GO:1900024	regulation of substrate adhesion-dependent cell spreading	0.143089	5	Dnm2/Dock1/Lims1/Ptk2/St6gal1
GO:0006914	autophagy	0.143314	21	Akt1/Becn1/Chmp4b/Clec16a/Depp1/Epm2a/Ercc4/Hap1/Htt/Irgm1/Mcl1/Mtcl1/Pik3r4/Ptk2/Qsox1/Srebf1/Stx12/Tbc1d14/Tlr9/Trim8/Usp30
GO:0061919	process utilizing autophagic mechanism	0.143314	21	Akt1/Becn1/Chmp4b/Clec16a/Depp1/Epm2a/Ercc4/Hap1/Htt/Irgm1/Mcl1/Mtcl1/Pik3r4/Ptk2/Qsox1/Srebf1/Stx12/Tbc1d14/Tlr9/Trim8/Usp30
GO:0051606	detection of stimulus	0.143544	11	Casr/Crtam/Grin2b/Hpn/Lxn/Otop1/Pawr/Piezo2/Pkd2l1/Rcvrn/Sox4
GO:0051928	positive regulation of calcium ion transport	0.143641	9	Cacnb2/Camk2a/Casr/Cracr2a/Hap1/Htt/Mylk/Slc9a1/Stac
GO:0051403	stress-activated MAPK cascade	0.144879	16	Akt1/Casr/Cbs/Dab2ip/Ezr/Fgfr3/Map3k1/Map3k4/Mecom/Ptk2/Tlr9/Tnfrsf19/Traf2/Trpv4/Wnt16/Wnt7b
GO:0050808	synapse organization	0.145844	27	Add2/Adgrb1/Adgrl2/Cacnb2/Cacng2/Cdk5r1/Chmp4b/Ctnnb1/Cttnbp2/Dab2ip/Elfn1/Farp1/Fzd9/Ghrl/Grin2b/Igsf9b/Lrrc4b/Nptxr/Nrcam/Ntn1/Palld/Pin1/Ptk2/Sdk1/Shank2/Ube2v2/Wnt7b
GO:0030162	regulation of proteolysis	0.14822	32	Adam8/Adam9/Akt1/Antxr1/Camk2n1/Clec16a/Dab2ip/Egf/Fam192a/Fgfr4/Fnip1/Grin2b/Hip1/Hip1r/Hpn/Htt/Ints1/Lxn/Mical1/Mtch1/Osbpl7/Pawr/Ptk2/Rcn3/Rffl/Rhbdf1/Rps6ka2/Senp1/Smarcc1/Spink13/Ube2v2/Wfdc1
GO:0007416	synapse assembly	0.148541	12	Add2/Adgrb1/Adgrl2/Farp1/Ghrl/Lrrc4b/Nptxr/Ntn1/Ptk2/Sdk1/Shank2/Ube2v2
GO:0046328	regulation of JNK cascade	0.148541	12	Akt1/Cbs/Dab2ip/Map3k1/Map3k4/Mecom/Tlr9/Tnfrsf19/Traf2/Trpv4/Wnt16/Wnt7b
GO:1903039	positive regulation of leukocyte cell-cell adhesion	0.148541	12	Adam8/Card11/Carmil2/Dock8/Epo/Il6st/Malt1/Nr4a3/Pawr/Pik3r6/Zbtb16/Zmiz1
GO:0000226	microtubule cytoskeleton organization	0.149497	28	Bcas3/Bicd2/Bora/Calml4/Cdk5r1/Cdk5rap2/Cep131/Cep350/Chmp4b/Ctnnb1/Deup1/Dnah8/Ezr/Htt/Katnal1/Mapre3/Msto1/Mtcl1/Nckap5/Pard6a/Poc1a/Ptk2/Sdccag8/Tekt2/Trpv4/Ttll11/Tubb2a/Zfp207
GO:0009582	detection of abiotic stimulus	0.149976	8	Grin2b/Hpn/Lxn/Otop1/Pawr/Piezo2/Pkd2l1/Rcvrn
GO:0001886	endothelial cell morphogenesis	0.150593	2	Col18a1/Heg1
GO:0001976	neurological system process involved in regulation of systemic arterial blood pressure	0.150593	2	Manf/Rps6ka2
GO:0002523	leukocyte migration involved in inflammatory response	0.150593	2	Adam8/Slamf8
GO:0003159	morphogenesis of an endothelium	0.150593	2	Adamts12/Ctnnb1
GO:0006144	purine nucleobase metabolic process	0.150593	2	Acpp/Mthfd1l
GO:0006534	cysteine metabolic process	0.150593	2	Cbs/Ggt5
GO:0007250	activation of NF-kappaB-inducing kinase activity	0.150593	2	Malt1/Traf2
GO:0007440	foregut morphogenesis	0.150593	2	Ctnnb1/Notch1
GO:0010759	positive regulation of macrophage chemotaxis	0.150593	2	Cxcl17/Trpv4
GO:0018158	protein oxidation	0.150593	2	Loxl4/Trabd2b
GO:0021548	pons development	0.150593	2	Cdk5r1/Scrib
GO:0030007	cellular potassium ion homeostasis	0.150593	2	Atp1a3/Kcnma1
GO:0030575	nuclear body organization	0.150593	2	Agap3/Fam118b
GO:0031998	regulation of fatty acid beta-oxidation	0.150593	2	Abcd2/Akt1
GO:0035729	cellular response to hepatocyte growth factor stimulus	0.150593	2	Adamts12/Vil1
GO:0038065	collagen-activated signaling pathway	0.150593	2	Col1a1/Itga11
GO:0042438	melanin biosynthetic process	0.150593	2	Dct/Rapgef2
GO:0043046	DNA methylation involved in gamete generation	0.150593	2	Ctcfl/Dnmt3a
GO:0044557	relaxation of smooth muscle	0.150593	2	Kcnma1/Pawr
GO:0045760	positive regulation of action potential	0.150593	2	Pawr/Slc9a1
GO:0046321	positive regulation of fatty acid oxidation	0.150593	2	Abcd2/Nr4a3
GO:0051307	meiotic chromosome separation	0.150593	2	Eme2/Ercc4
GO:0060033	anatomical structure regression	0.150593	2	Amh/Wnt7b
GO:0060046	regulation of acrosome reaction	0.150593	2	Plb1/Spink13
GO:0060068	vagina development	0.150593	2	Lrp2/Mertk
GO:0060330	regulation of response to interferon-gamma	0.150593	2	Irgm1/Otop1
GO:0060334	regulation of interferon-gamma-mediated signaling pathway	0.150593	2	Irgm1/Otop1
GO:0060442	branching involved in prostate gland morphogenesis	0.150593	2	Bmp7/Rxra
GO:0060710	chorio-allantoic fusion	0.150593	2	Bmp7/Wnt7b
GO:0060788	ectodermal placode formation	0.150593	2	Ctnnb1/Tbx3
GO:0061154	endothelial tube morphogenesis	0.150593	2	Adamts12/Ctnnb1
GO:0071697	ectodermal placode morphogenesis	0.150593	2	Ctnnb1/Tbx3
GO:0071803	positive regulation of podosome assembly	0.150593	2	Asap1/Palld
GO:0072109	glomerular mesangium development	0.150593	2	Bmp7/Notch1
GO:0090083	regulation of inclusion body assembly	0.150593	2	Hap1/Sncaip
GO:0098598	learned vocalization behavior or vocal learning	0.150593	2	Cntnap2/Htt
GO:0098953	receptor diffusion trapping	0.150593	2	Cacng2/Camk2a
GO:0098970	postsynaptic neurotransmitter receptor diffusion trapping	0.150593	2	Cacng2/Camk2a
GO:0099628	neurotransmitter receptor diffusion trapping	0.150593	2	Cacng2/Camk2a
GO:1900409	positive regulation of cellular response to oxidative stress	0.150593	2	Mcl1/Pawr
GO:1901160	primary amino compound metabolic process	0.150593	2	Cyp2d22/Grin2a
GO:1902285	semaphorin-plexin signaling pathway involved in neuron projection guidance	0.150593	2	Plxna4/Plxnc1
GO:1903209	positive regulation of oxidative stress-induced cell death	0.150593	2	Mcl1/Pawr
GO:2000253	positive regulation of feeding behavior	0.150593	2	Ghrl/Nr4a3
GO:0008643	carbohydrate transport	0.150875	10	Akt1/Ezr/Nr4a3/Ptpn11/Slc2a9/Slc45a4/Slc5a11/Sort1/Stxbp4/Vil1
GO:1901343	negative regulation of vasculature development	0.15099	9	Adgrb1/Angpt4/Bmp7/Ctnnb1/Dab2ip/Nfatc1/Notch1/Ptprm/Sulf1
GO:2000117	negative regulation of cysteine-type endopeptidase activity	0.151648	6	Akt1/Fnip1/Htt/Ints1/Mical1/Rffl
GO:0070925	organelle assembly	0.151687	37	Asap1/Becn1/Cdk5rap2/Celsr3/Cep131/Chmp4b/Deup1/Dnah8/Dnm2/Ezr/Fhod3/Hap1/Htt/Irgm1/Kctd17/Lrrc4b/Mapre3/Msto1/Myom3/Nebl/Nectin2/Nptxr/Palld/Poc1a/Ppan/Rab3ip/Rpl10l/Rps15/Shank2/Stx12/Tbc1d14/Tbc1d30/Tekt2/Traf7/Vil1/Wdr34/Zfp207
GO:0009895	negative regulation of catabolic process	0.151953	17	Adgrb1/Akt1/Becn1/Chmp4b/Clec16a/Dab2ip/Fam192a/Grin2a/Mcl1/Nbas/Pin1/Ptk2/Qsox1/Senp1/Smarcc1/Tbc1d14/Usp30
GO:0009994	oocyte differentiation	0.152978	4	Ctnnb1/Dmc1/Grb14/Rps6ka2
GO:0032881	regulation of polysaccharide metabolic process	0.152978	4	Akt1/Egf/Gfpt1/Phlda2
GO:0038083	peptidyl-tyrosine autophosphorylation	0.152978	4	Aatk/Blk/Ptk2/Tnk2
GO:0050974	detection of mechanical stimulus involved in sensory perception	0.152978	4	Grin2b/Hpn/Pawr/Piezo2
GO:0051693	actin filament capping	0.152978	4	Add2/Capg/Carmil2/Vil1
GO:1903053	regulation of extracellular matrix organization	0.152978	4	Antxr1/Carmil2/Fgfr4/Notch1
GO:0007164	establishment of tissue polarity	0.154242	5	Ankrd6/Celsr1/Celsr3/Fzd6/Wnt7b
GO:0045599	negative regulation of fat cell differentiation	0.154242	5	Id4/Ncor2/Sort1/Trpv4/Zfpm1
GO:0035265	organ growth	0.15581	14	Akt1/Cacna1c/Ctnnb1/Heg1/Matn2/Notch1/Pin1/Poc1a/Psapl1/Ptk2/Ptpn11/Rxra/Sav1/Tenm4
GO:2000106	regulation of leukocyte apoptotic process	0.156108	7	Adam8/Dock8/Fnip1/Mertk/Nr4a3/Rapgef2/St6gal1
GO:0007249	I-kappaB kinase/NF-kappaB signaling	0.156564	11	Akt1/Card11/Ctnnb1/Dab2ip/Edaradd/Malt1/Relb/Tlr9/Tnfrsf19/Traf2/Trim8
GO:0045598	regulation of fat cell differentiation	0.157898	10	Akt1/Id4/Mecom/Ncor2/Sav1/Sort1/Trpv4/Wnt5b/Zbtb16/Zfpm1
GO:0048593	camera-type eye morphogenesis	0.157898	10	Bmp7/Ctnnb1/Dscam/Fgfr3/Man2a1/Phactr4/Ptprm/Scrib/Sdk1/Six3
GO:0009581	detection of external stimulus	0.158101	8	Grin2b/Hpn/Lxn/Otop1/Pawr/Piezo2/Pkd2l1/Rcvrn
GO:0032414	positive regulation of ion transmembrane transporter activity	0.158101	8	Cacnb2/Cacng2/Cracr2a/Dnm2/Hap1/Htt/Slc9a1/Stac
GO:0071887	leukocyte apoptotic process	0.158101	8	Adam8/Akt1/Dock8/Fnip1/Mertk/Nr4a3/Rapgef2/St6gal1
GO:0046578	regulation of Ras protein signal transduction	0.15842	15	Abr/Arhgef3/Arhgef4/Dab2ip/Dnm2/Epo/Farp1/Fgd3/Icmt/Lpar2/Notch1/Obscn/Psd/Rasa4/Rgl2
GO:0060541	respiratory system development	0.15842	15	Celsr1/Ctnnb1/Cux1/Edaradd/Fgfr3/Fgfr4/Fgfrl1/Heg1/Man2a1/Msc/Ncor2/Notch1/Rcn3/Sav1/Wnt7b
GO:0045862	positive regulation of proteolysis	0.158444	18	Adam8/Adam9/Akt1/Antxr1/Dab2ip/Egf/Fgfr4/Grin2b/Hip1/Hip1r/Hpn/Mtch1/Osbpl7/Pawr/Ptk2/Rcn3/Senp1/Ube2v2
GO:0006814	sodium ion transport	0.15854	13	Akt1/Atp1a3/Dnm2/Fxyd2/Pkd2l1/Slc13a3/Slc4a11/Slc5a11/Slc5a5/Slc8a2/Slc9a1/Slc9a8/Slc9a9
GO:0001523	retinoid metabolic process	0.159358	3	Crabp2/Dhrs3/Plb1
GO:0003338	metanephros morphogenesis	0.159358	3	Ctnnb1/Kif26b/Wnt7b
GO:0007140	male meiotic nuclear division	0.159358	3	Catsperz/Chtf18/Dmc1
GO:0007413	axonal fasciculation	0.159358	3	Casp6/Cdk5r1/Celsr3
GO:0009072	aromatic amino acid family metabolic process	0.159358	3	Cyp2d22/Dct/Hal
GO:0032801	receptor catabolic process	0.159358	3	Becn1/Pik3r4/Rnf43
GO:0044088	regulation of vacuole organization	0.159358	3	Becn1/Chmp4b/Tbc1d14
GO:0048246	macrophage chemotaxis	0.159358	3	Cxcl17/Slamf8/Trpv4
GO:0060142	regulation of syncytium formation by plasma membrane fusion	0.159358	3	Adam9/Adgrb1/Ocstamp
GO:0072576	liver morphogenesis	0.159358	3	Hpn/Lims1/Tet2
GO:0106030	neuron projection fasciculation	0.159358	3	Casp6/Cdk5r1/Celsr3
GO:1905508	protein localization to microtubule organizing center	0.159358	3	Cep131/Htt/Pard6a
GO:0030036	actin cytoskeleton organization	0.160531	38	Abr/Actn1/Add2/Adgrb1/Antxr1/Arhgap26/Bcas3/Capg/Carmil2/Cdk5r1/Celsr1/Cnn2/Cttnbp2/Ezr/Farp1/Fhod3/Ghrl/Hip1/Hip1r/Limk1/Map3k1/Mical1/Mtss1/Myo18a/Myom3/Nebl/Palld/Pawr/Phactr4/Ppargc1b/Rap1gds1/Rflna/Rtkn/Trpv4/Ush1c/Vil1/Washc3/Wipf1
GO:0007409	axonogenesis	0.160891	28	Aatk/Apbb2/Artn/Bmp7/Cdk5r1/Celsr3/Crabp2/Dclk1/Dnm2/Dscam/Dscaml1/Efna4/Fgfr3/Ispd/Limk1/Matn2/Notch1/Nr4a3/Nrcam/Ntn1/Omg/Pip5k1c/Plxna4/Plxnc1/Ptk2/Ptpn11/Ptprm/Wnt7b
GO:1902117	positive regulation of organelle assembly	0.161635	6	Asap1/Becn1/Hap1/Htt/Kctd17/Palld
GO:0060322	head development	0.162768	39	Aatk/Abr/Adgrl2/Bmp7/Bptf/Cbs/Cdk5r1/Cdk5rap2/Cntnap2/Col1a1/Crispld2/Ctnnb1/Dab2ip/Dclk1/Dct/Dscaml1/Egf/Fgfr3/Fzd6/Hap1/Hspg2/Htt/Id4/Lrp2/Mecom/Ncor2/Nme7/Notch1/Nr4a3/Plxna4/Ptpn11/Rapgef2/Scrib/Shank2/Six3/Tbx3/Trappc9/Whrn/Wnt7b
GO:0000768	syncytium formation by plasma membrane fusion	0.165742	5	Adam8/Adam9/Adgrb1/Ocstamp/Sh3pxd2a
GO:0007193	adenylate cyclase-inhibiting G protein-coupled receptor signaling pathway	0.165742	5	Casr/Chrm4/Grm4/Psapl1/Sstr5
GO:0140253	cell-cell fusion	0.165742	5	Adam8/Adam9/Adgrb1/Ocstamp/Sh3pxd2a
GO:0010921	regulation of phosphatase activity	0.16623	9	Elfn1/Epm2a/Farp1/Hpn/Htt/Pawr/Ppargc1b/Ppp1r27/Ppp6r3
GO:0046330	positive regulation of JNK cascade	0.16623	9	Dab2ip/Map3k1/Map3k4/Tlr9/Tnfrsf19/Traf2/Trpv4/Wnt16/Wnt7b
GO:0061387	regulation of extent of cell growth	0.16623	9	Aatk/Cdk5r1/Crabp2/Dnm2/Dscam/Limk1/Ntn1/Omg/Plxna4
GO:0045446	endothelial cell differentiation	0.166429	8	Cldn5/Col18a1/Ctnnb1/Ezr/Heg1/Notch1/Rapgef2/Wnt7b
GO:0090101	negative regulation of transmembrane receptor protein serine/threonine kinase signaling pathway	0.166429	8	Cav2/Chst11/Dnm2/Fam89b/Ldlrad4/Lrp2/Notch1/Pin1
GO:0016126	sterol biosynthetic process	0.166601	4	Fdft1/Lbr/Srebf1/Tm7sf2
GO:0019748	secondary metabolic process	0.166601	4	Akr7a5/Cbs/Dct/Rapgef2
GO:0034308	primary alcohol metabolic process	0.166601	4	Akr7a5/Dhrs3/Kcnma1/Plb1
GO:0038179	neurotrophin signaling pathway	0.166601	4	Hap1/Ptpn11/Rapgef2/Sort1
GO:0050850	positive regulation of calcium-mediated signaling	0.166601	4	Camta1/Hap1/Htt/Slc9a1
GO:0086002	cardiac muscle cell action potential involved in contraction	0.166601	4	Cacna1c/Cacna1g/Cacnb2/Kcnn2
GO:1901799	negative regulation of proteasomal protein catabolic process	0.166601	4	Clec16a/Fam192a/Senp1/Smarcc1
GO:0071417	cellular response to organonitrogen compound	0.168752	28	Adcy6/Akt1/Atp1a3/Camk2a/Casp6/Cav2/Ccnd3/Col1a1/Ctnnb1/Dnm2/Dnmt3a/Drd5/Ezr/Grb14/Grin2a/Hrh1/Mir122/Mirlet7i/Nr4a3/Otop1/Ptk2/Ptpn11/Rapgef2/Slc9a1/Smarcc1/Srebf1/Stxbp4/Tlr9
GO:0001701	in utero embryonic development	0.169287	27	Akt1/Bmp7/Bptf/Ccdc24/Cmtm3/Ctnnb1/Dad1/Grin2b/Heg1/Icmt/Ints1/Man2a1/Mecom/Mgat1/Mtss1/Myo18b/Ncor2/Notch1/Phlda2/Pnldc1/Rad51b/Rxra/Slc39a3/Snai1/Tbx3/Wnt7b/Zmiz1
GO:0016331	morphogenesis of embryonic epithelium	0.170845	13	Bmp7/Celsr1/Ctnnb1/Fzd6/Htt/Lrp2/Mthfd1l/Phactr4/Scrib/Sox4/Sulf1/Tgif1/Wnt7b
GO:0032870	cellular response to hormone stimulus	0.171315	30	Abhd2/Adcy6/Akt1/Bmp7/Camk2a/Cav2/Ccnd3/Cdk5r1/Chrm4/Ctnnb1/Grb14/Jun/Ly6h/Ncoa2/Ncor2/Notch1/Nr4a3/Nr5a2/Otop1/Ppargc1b/Ptk2/Ptpn11/Ramp1/Safb/Slc9a1/Smarcc1/Srebf1/Sstr5/Stxbp4/Zfp366
GO:0000077	DNA damage checkpoint	0.171896	6	Eme2/Ints7/Ptpn11/Sox4/Thoc1/Wdr76
GO:0048708	astrocyte differentiation	0.171896	6	Eif2b5/Fgfr3/Id4/Il6st/Notch1/Ptpn11
GO:1904427	positive regulation of calcium ion transmembrane transport	0.171896	6	Cacnb2/Cracr2a/Hap1/Htt/Slc9a1/Stac
GO:0050807	regulation of synapse organization	0.172716	17	Adgrb1/Adgrl2/Cdk5r1/Chmp4b/Cttnbp2/Dab2ip/Farp1/Fzd9/Ghrl/Grin2b/Lrrc4b/Nptxr/Nrcam/Ntn1/Ptk2/Shank2/Ube2v2
GO:0051056	regulation of small GTPase mediated signal transduction	0.172716	17	Abr/Arhgap26/Arhgef3/Arhgef4/Dab2ip/Dnm2/Epo/Farp1/Fgd3/Icmt/Lpar2/Notch1/Obscn/Psd/Rap1gap/Rasa4/Rgl2
GO:0030031	cell projection assembly	0.173933	26	Arhgef4/Asap1/Bcas3/Capg/Carmil2/Celsr3/Cep131/Dnah8/Dnm2/Ezr/Fgd3/Hap1/Htt/Kctd17/Mtss1l/Mylk/Ntn1/Poc1a/Podxl/Rab3ip/Rap1gap/Rapgef2/Tbc1d30/Tekt2/Ttyh1/Wdr34
GO:0045995	regulation of embryonic development	0.174113	9	Bmp7/Celsr1/Ctnnb1/Notch1/Phlda2/Snai1/Sulf1/Tenm4/Tgif1
GO:0050709	negative regulation of protein secretion	0.174113	9	Ezr/Ghrl/Hadh/Midn/Oit1/Pim3/Ptpn11/Rhbdf1/Srebf1
GO:0031331	positive regulation of cellular catabolic process	0.174373	19	Abcd2/Adam8/Adam9/Akt1/Becn1/Clec16a/Dab2ip/Egf/Epm2a/Ezr/Htt/Irgm1/Osbpl7/Ptk2/Tlr9/Tnrc6b/Trim8/Ube2v2/Zbtb20
GO:0072329	monocarboxylic acid catabolic process	0.174479	7	Abcd2/Abhd2/Acsbg2/Akt1/Etfa/Hadh/Hsd17b4
GO:0090263	positive regulation of canonical Wnt signaling pathway	0.174479	7	Col1a1/Egf/Fgfr3/Fzd9/Pin1/Sox4/Tmem198
GO:0001840	neural plate development	0.175951	2	Ctnnb1/Htt
GO:0002693	positive regulation of cellular extravasation	0.175951	2	Adam8/Pawr
GO:0003222	ventricular trabecula myocardium morphogenesis	0.175951	2	Heg1/Notch1
GO:0006491	N-glycan processing	0.175951	2	Man1a/Man2a1
GO:0006516	glycoprotein catabolic process	0.175951	2	Adamts12/Fbxo6
GO:0006582	melanin metabolic process	0.175951	2	Dct/Rapgef2
GO:0014820	tonic smooth muscle contraction	0.175951	2	Cacna1g/Mylk
GO:0015701	bicarbonate transport	0.175951	2	Slc4a11/Slc4a5
GO:0016180	snRNA processing	0.175951	2	Ints1/Ints7
GO:0030213	hyaluronan biosynthetic process	0.175951	2	Ccnd3/Egf
GO:0031223	auditory behavior	0.175951	2	Cntnap2/Htt
GO:0034312	diol biosynthetic process	0.175951	2	Pcbd2/Pts
GO:0042403	thyroid hormone metabolic process	0.175951	2	Hpn/Slc5a5
GO:0042790	nucleolar large rRNA transcription by RNA polymerase I	0.175951	2	H2afy/Ippk
GO:0045955	negative regulation of calcium ion-dependent exocytosis	0.175951	2	Cbarp/Notch1
GO:0060712	spongiotrophoblast layer development	0.175951	2	Akt1/Phlda2
GO:0060973	cell migration involved in heart development	0.175951	2	Bmp7/Notch1
GO:0071380	cellular response to prostaglandin E stimulus	0.175951	2	Adcy6/Akt1
GO:0071577	zinc ion transmembrane transport	0.175951	2	Slc39a13/Slc39a3
GO:0071696	ectodermal placode development	0.175951	2	Ctnnb1/Tbx3
GO:0072160	nephron tubule epithelial cell differentiation	0.175951	2	Ctnnb1/Mtss1
GO:0072529	pyrimidine-containing compound catabolic process	0.175951	2	Dctpp1/Tet2
GO:0072677	eosinophil migration	0.175951	2	Adam8/Hrh1
GO:0098969	neurotransmitter receptor transport to postsynaptic membrane	0.175951	2	Grip1/Scrib
GO:0099638	endosome to plasma membrane protein transport	0.175951	2	Grip1/Scrib
GO:1901524	regulation of mitophagy	0.175951	2	Clec16a/Usp30
GO:1904355	positive regulation of telomere capping	0.175951	2	Map3k4/Nek7
GO:1905523	positive regulation of macrophage migration	0.175951	2	Cxcl17/Trpv4
GO:2000479	regulation of cAMP-dependent protein kinase activity	0.175951	2	Htt/Rapgef2
GO:2000651	positive regulation of sodium ion transmembrane transporter activity	0.175951	2	Dnm2/Slc9a1
GO:2000846	regulation of corticosteroid hormone secretion	0.175951	2	Ghrl/Ptpn11
GO:2001044	regulation of integrin-mediated signaling pathway	0.175951	2	Lims1/Phactr4
GO:0006929	substrate-dependent cell migration	0.176885	3	Adam8/Itga11/Ntn1
GO:0009069	serine family amino acid metabolic process	0.176885	3	Cbs/Ggt5/Sephs1
GO:0016101	diterpenoid metabolic process	0.176885	3	Crabp2/Dhrs3/Plb1
GO:0016572	histone phosphorylation	0.176885	3	H2afy/Pim3/Rps6ka5
GO:0021799	cerebral cortex radially oriented cell migration	0.176885	3	Cdk5r1/Ctnnb1/Dab2ip
GO:0031069	hair follicle morphogenesis	0.176885	3	Ctnnb1/Notch1/Snai1
GO:0032728	positive regulation of interferon-beta production	0.176885	3	Ptpn11/Tlr9/Zbtb20
GO:0032781	positive regulation of ATPase activity	0.176885	3	Casr/Dnal4/Dnm2
GO:0042417	dopamine metabolic process	0.176885	3	Cyp2d22/Grin2a/Sncaip
GO:0043114	regulation of vascular permeability	0.176885	3	Abr/Hrh1/Trpv4
GO:0045920	negative regulation of exocytosis	0.176885	3	Abr/Cbarp/Notch1
GO:0051181	cofactor transport	0.176885	3	Flvcr2/Lrp2/Slc25a47
GO:0051452	intracellular pH reduction	0.176885	3	Atp6v0a2/Atp6v0a4/Slamf8
GO:0051985	negative regulation of chromosome segregation	0.176885	3	Cdk5rap2/Chtf18/Zfp207
GO:0061311	cell surface receptor signaling pathway involved in heart development	0.176885	3	Ctnnb1/Notch1/Snai1
GO:1902186	regulation of viral release from host cell	0.176885	3	Cav2/Chmp4b/Trim8
GO:1904358	positive regulation of telomere maintenance via telomere lengthening	0.176885	3	Ctnnb1/Map3k4/Nek7
GO:1903531	negative regulation of secretion by cell	0.177172	13	Abr/Cbarp/Ezr/Ghrl/Hadh/Il11/Midn/Notch1/Oit1/Pim3/Ptpn11/Rhbdf1/Srebf1
GO:0002011	morphogenesis of an epithelial sheet	0.177569	5	Bmp7/Carmil2/Map3k1/Notch1/Phactr4
GO:0006949	syncytium formation	0.177569	5	Adam8/Adam9/Adgrb1/Ocstamp/Sh3pxd2a
GO:0048678	response to axon injury	0.177569	5	Fgfr3/Jun/Matn2/Omg/Xylt1
GO:0051304	chromosome separation	0.177569	5	Cdk5rap2/Eme2/Ercc4/Nek6/Zfp207
GO:0061337	cardiac conduction	0.177569	5	Cacna1c/Cacna1g/Cacnb2/Kcnn2/Slc9a1
GO:0022412	cellular process involved in reproduction in multicellular organism	0.179465	19	Abhd2/Akt1/Amh/Catsperz/Cep131/Chtf18/Ctcfl/Ctnnb1/Dmc1/Dnmt3a/Grb14/Nectin2/Pacrg/Rps6ka2/Six5/Spesp1/Tssk2/Zbtb16/Zmiz1
GO:0045807	positive regulation of endocytosis	0.179909	10	Abr/Dnm2/Egf/Hip1/Hip1r/Lrp2/Mertk/Myo18a/Ptk2/Rap1gap
GO:0031641	regulation of myelination	0.180636	4	Akt1/Ctnnb1/Rxra/Tenm4
GO:0070849	response to epidermal growth factor	0.180636	4	Akt1/Dab2ip/Ptpn11/Vil1
GO:0072698	protein localization to microtubule cytoskeleton	0.180636	4	Cep131/Htt/Mapre3/Pard6a
GO:0007017	microtubule-based process	0.182219	37	Bcas3/Bicd2/Bora/Calml4/Cdk5r1/Cdk5rap2/Cep131/Cep350/Chmp4b/Ctnnb1/Deup1/Dnah10/Dnah17/Dnah8/Dnah9/Dnal4/Ezr/Hap1/Htt/Katnal1/Kif6/Kifc3/Mapre3/Msto1/Mtcl1/Nckap5/Nme7/Pard6a/Poc1a/Ptk2/Sdccag8/Tekt2/Trpv4/Ttll11/Tubb2a/Wdr34/Zfp207
GO:0010611	regulation of cardiac muscle hypertrophy	0.182419	6	Becn1/Notch1/Nr4a3/Pin1/Ptk2/Slc9a1
GO:2001259	positive regulation of cation channel activity	0.182419	6	Cacnb2/Cacng2/Cracr2a/Hap1/Htt/Stac
GO:0042177	negative regulation of protein catabolic process	0.183669	8	Adgrb1/Clec16a/Dab2ip/Fam192a/Grin2a/Pin1/Senp1/Smarcc1
GO:1902882	regulation of response to oxidative stress	0.183998	7	Ctnnb1/Erp27/H2afy/Mcl1/Nr4a3/Pawr/Tldc1
GO:0019216	regulation of lipid metabolic process	0.184261	18	Abcd2/Akt1/Ccnc/Dab2ip/Disp3/Fgfr3/Fgfr4/H2afy/Hrh1/Kcnma1/Nr4a3/Pik3r4/Pik3r6/Ppp2r5a/Psapl1/Snai1/Srebf1/Zbtb20
GO:0016197	endosomal transport	0.184308	11	Clec16a/Grip1/Htt/Lrp2/Pheta1/Scrib/Snx8/Sort1/Stx12/Tbc1d14/Tmem50b
GO:1901137	carbohydrate derivative biosynthetic process	0.188258	29	Adcy6/Aldoa/Alg1/B4galt7/Ccnd3/Chst11/Chst5/Chst8/Ctnnb1/Dad1/Dhtkd1/Egf/Eogt/Galnt10/Galnt18/Gfpt1/Gk5/Gxylt2/Ispd/Mgat1/Nme7/Pawr/Pygl/Ramp1/St3gal5/St6gal1/Tet2/Xylt1/Zbtb20
GO:0045785	positive regulation of cell adhesion	0.188879	23	Adam8/Adam9/Bmp7/Card11/Carmil2/Dnm2/Dock1/Dock8/Egflam/Epo/Fbln2/Il6st/Kif26b/Lims1/Malt1/Nr4a3/Pawr/Pik3r6/Plekha2/Ptk2/Rap1gap/Zbtb16/Zmiz1
GO:0000422	autophagy of mitochondrion	0.189703	5	Becn1/Clec16a/Htt/Srebf1/Usp30
GO:0030042	actin filament depolymerization	0.189703	5	Add2/Capg/Carmil2/Mical1/Vil1
GO:0033209	tumor necrosis factor-mediated signaling pathway	0.189703	5	Card14/Lims1/Rffl/Spata2/Traf2
GO:0061726	mitochondrion disassembly	0.189703	5	Becn1/Clec16a/Htt/Srebf1/Usp30
GO:1903078	positive regulation of protein localization to plasma membrane	0.189703	5	Akt1/Dpp6/Ezr/Stac/Vil1
GO:0000280	nuclear division	0.189876	19	Becn1/Bmp7/Bora/Catsperz/Ccnd3/Ccnj/Cdk5rap2/Chmp4b/Chtf18/Dmc1/Egf/Eme2/Ercc4/Fgfr3/H2afy/Msto1/Nek6/Rps6ka2/Zfp207
GO:0002009	morphogenesis of an epithelium	0.19002	31	Adamts12/Ankrd6/Bmp7/Carmil2/Casr/Celsr1/Celsr3/Ctnnb1/Egf/Fgfr3/Frem2/Fzd6/Htt/Id4/Kif26b/Lrp2/Map3k1/Mthfd1l/Mtss1/Nfatc1/Notch1/Ntn1/Phactr4/Rxra/Scrib/Snai1/Sox4/Sulf1/Tbx3/Tgif1/Wnt7b
GO:0017156	calcium ion regulated exocytosis	0.19158	11	Cacna1c/Cacna1g/Camk2a/Cbarp/Grm4/Notch1/Ppfia2/Scrib/Stx11/Syt13/Syt6
GO:0034329	cell junction assembly	0.192027	14	Actn1/Arvcf/Bcas3/Cldn5/Ctnnb1/Gjb2/Heg1/Lims1/Nphp4/Ptk2/Rapgef2/Snai1/Tns1/Trpv4
GO:0120031	plasma membrane bounded cell projection assembly	0.192131	25	Arhgef4/Asap1/Bcas3/Carmil2/Celsr3/Cep131/Dnah8/Dnm2/Ezr/Fgd3/Hap1/Htt/Kctd17/Mtss1l/Mylk/Ntn1/Poc1a/Podxl/Rab3ip/Rap1gap/Rapgef2/Tbc1d30/Tekt2/Ttyh1/Wdr34
GO:0006939	smooth muscle contraction	0.192567	8	Cacna1c/Cacna1g/Ghrl/Kcnma1/Mylk/Pawr/Rap1gds1/Sulf1
GO:0032411	positive regulation of transporter activity	0.192567	8	Cacnb2/Cacng2/Cracr2a/Dnm2/Hap1/Htt/Slc9a1/Stac
GO:0014743	regulation of muscle hypertrophy	0.19319	6	Becn1/Notch1/Nr4a3/Pin1/Ptk2/Slc9a1
GO:0014855	striated muscle cell proliferation	0.19319	6	Ctnnb1/Notch1/Rxra/Sav1/Six5/Tenm4
GO:0045582	positive regulation of T cell differentiation	0.19319	6	Adam8/Carmil2/Malt1/Pik3r6/Zbtb16/Zmiz1
GO:0045669	positive regulation of osteoblast differentiation	0.19319	6	Bmp7/Cebpd/Ctnnb1/Id4/Il6st/Wnt7b
GO:0071277	cellular response to calcium ion	0.19319	6	Jun/Mylk/Rasa4/Rasgrp2/Syt13/Syt6
GO:0090630	activation of GTPase activity	0.19319	6	Bcas3/Mtss1l/Scrib/Tbc1d14/Tbc1d2/Tbc1d30
GO:1903201	regulation of oxidative stress-induced cell death	0.19319	6	Ctnnb1/Erp27/Mcl1/Nr4a3/Pawr/Tldc1
GO:0048709	oligodendrocyte differentiation	0.193727	7	Ctnnb1/Eif2b5/Fgfr3/Id4/Notch1/Omg/Tenm4
GO:0030100	regulation of endocytosis	0.194291	16	Abr/Cnn2/Dnm2/Egf/Hap1/Hip1/Hip1r/Lrp2/Mertk/Myo18a/Nsf/Pip5k1c/Ptk2/Rap1gap/Scrib/Tnk2
GO:0002686	negative regulation of leukocyte migration	0.194911	3	Abr/Akt1/Slamf8
GO:0003181	atrioventricular valve morphogenesis	0.194911	3	Notch1/Sox4/Zfpm1
GO:0016233	telomere capping	0.194911	3	Ercc4/Map3k4/Nek7
GO:0019076	viral release from host cell	0.194911	3	Cav2/Chmp4b/Trim8
GO:0032435	negative regulation of proteasomal ubiquitin-dependent protein catabolic process	0.194911	3	Clec16a/Senp1/Smarcc1
GO:0034260	negative regulation of GTPase activity	0.194911	3	Bcas3/Dab2ip/Rasa4
GO:0035890	exit from host	0.194911	3	Cav2/Chmp4b/Trim8
GO:0035891	exit from host cell	0.194911	3	Cav2/Chmp4b/Trim8
GO:0038202	TORC1 signaling	0.194911	3	Card11/Clec16a/Fnip1
GO:0045851	pH reduction	0.194911	3	Atp6v0a2/Atp6v0a4/Slamf8
GO:0046825	regulation of protein export from nucleus	0.194911	3	Ptpn11/Wipf1/Xpo4
GO:0052126	movement in host environment	0.194911	3	Cav2/Chmp4b/Trim8
GO:0052192	movement in environment of other organism involved in symbiotic interaction	0.194911	3	Cav2/Chmp4b/Trim8
GO:0060004	reflex	0.194911	3	Hpn/Kcnma1/Nr4a3
GO:0070741	response to interleukin-6	0.194911	3	Il6st/Ptprt/Traf7
GO:0071354	cellular response to interleukin-6	0.194911	3	Il6st/Ptprt/Traf7
GO:0071675	regulation of mononuclear cell migration	0.194911	3	Cxcl17/Slamf8/Trpv4
GO:1902622	regulation of neutrophil migration	0.194911	3	Adam8/Pawr/Slamf8
GO:0030166	proteoglycan biosynthetic process	0.195045	4	Chst11/Chst8/Ctnnb1/Xylt1
GO:0048066	developmental pigmentation	0.195045	4	Dct/Gna11/Grk3/Lrmda
GO:0050918	positive chemotaxis	0.195045	4	Artn/Casr/Scrib/Wnt7b
GO:0051646	mitochondrion localization	0.195045	4	Hap1/Msto1/Nectin2/Slc4a5
GO:0072527	pyrimidine-containing compound metabolic process	0.195045	4	Acpp/Dctpp1/Nme7/Tet2
GO:0002761	regulation of myeloid leukocyte differentiation	0.201641	8	Adam8/Ctnnb1/Fgfr3/Jun/Ocstamp/Ppargc1b/Tmem178/Zfpm1
GO:0001649	osteoblast differentiation	0.201658	12	Akt1/Bmp7/Cebpd/Col1a1/Ctnnb1/Id4/Il6st/Nfatc1/Notch1/Ptk2/Wnt7b/Wwox
GO:0001774	microglial cell activation	0.201904	2	Jun/Tlr9
GO:0001921	positive regulation of receptor recycling	0.201904	2	Nsf/Scrib
GO:0002269	leukocyte activation involved in inflammatory response	0.201904	2	Jun/Tlr9
GO:0002834	regulation of response to tumor cell	0.201904	2	Crtam/Nectin2
GO:0002837	regulation of immune response to tumor cell	0.201904	2	Crtam/Nectin2
GO:0003161	cardiac conduction system development	0.201904	2	Notch1/Tbx3
GO:0006044	N-acetylglucosamine metabolic process	0.201904	2	Chst1/Chst5
GO:0007035	vacuolar acidification	0.201904	2	Atp6v0a2/Atp6v0a4
GO:0007216	G protein-coupled glutamate receptor signaling pathway	0.201904	2	Grm4/Homer3
GO:0009147	pyrimidine nucleoside triphosphate metabolic process	0.201904	2	Dctpp1/Nme7
GO:0010715	regulation of extracellular matrix disassembly	0.201904	2	Carmil2/Fgfr4
GO:0015740	C4-dicarboxylate transport	0.201904	2	Slc13a3/Slc25a22
GO:0020027	hemoglobin metabolic process	0.201904	2	Epo/Tet2
GO:0032069	regulation of nuclease activity	0.201904	2	Akt1/Oas2
GO:0032570	response to progesterone	0.201904	2	Abhd2/Ncoa2
GO:0033033	negative regulation of myeloid cell apoptotic process	0.201904	2	Epo/St6gal1
GO:0035728	response to hepatocyte growth factor	0.201904	2	Adamts12/Vil1
GO:0035791	platelet-derived growth factor receptor-beta signaling pathway	0.201904	2	Hip1/Hip1r
GO:0035855	megakaryocyte development	0.201904	2	Ptpn11/Zfpm1
GO:0035930	corticosteroid hormone secretion	0.201904	2	Ghrl/Ptpn11
GO:0043217	myelin maintenance	0.201904	2	Abcd2/Akt1
GO:0043650	dicarboxylic acid biosynthetic process	0.201904	2	Htt/Mthfd1l
GO:0046653	tetrahydrofolate metabolic process	0.201904	2	Mthfd1l/Sardh
GO:0046827	positive regulation of protein export from nucleus	0.201904	2	Wipf1/Xpo4
GO:0050650	chondroitin sulfate proteoglycan biosynthetic process	0.201904	2	Chst11/Xylt1
GO:0051447	negative regulation of meiotic cell cycle	0.201904	2	Grb14/Rps6ka2
GO:0060841	venous blood vessel development	0.201904	2	Heg1/Notch1
GO:0060979	vasculogenesis involved in coronary vascular morphogenesis	0.201904	2	Epo/Notch1
GO:0070286	axonemal dynein complex assembly	0.201904	2	Dnah8/Tekt2
GO:0071379	cellular response to prostaglandin stimulus	0.201904	2	Adcy6/Akt1
GO:0072283	metanephric renal vesicle morphogenesis	0.201904	2	Ctnnb1/Kif26b
GO:0090025	regulation of monocyte chemotaxis	0.201904	2	Cxcl17/Slamf8
GO:0098877	neurotransmitter receptor transport to plasma membrane	0.201904	2	Grip1/Scrib
GO:1901387	positive regulation of voltage-gated calcium channel activity	0.201904	2	Cacnb2/Stac
GO:1902188	positive regulation of viral release from host cell	0.201904	2	Cav2/Chmp4b
GO:1903540	establishment of protein localization to postsynaptic membrane	0.201904	2	Grip1/Scrib
GO:2000345	regulation of hepatocyte proliferation	0.201904	2	Hpn/Lims1
GO:2000831	regulation of steroid hormone secretion	0.201904	2	Ghrl/Ptpn11
GO:0015800	acidic amino acid transport	0.202122	5	Grin2b/Htt/Slc13a3/Slc25a22/Slc6a1
GO:0032922	circadian regulation of gene expression	0.202122	5	Gfpt1/Ncoa2/Prkg2/Rai1/Relb
GO:0060038	cardiac muscle cell proliferation	0.202122	5	Ctnnb1/Notch1/Rxra/Sav1/Tenm4
GO:1903827	regulation of cellular protein localization	0.202248	28	Akt1/Bcas3/Cacng2/Camk2a/Cav2/Cdk5r1/Cep131/Ctnnb1/Dclk1/Dpp6/Egf/Ezr/Fzd9/H2afy/Htt/Icmt/Mtcl1/Nvl/Pard6a/Pin1/Ppp2r5a/Ptpn11/Srebf1/Stac/Trim8/Vil1/Wipf1/Xpo4
GO:0045786	negative regulation of cell cycle	0.203319	23	Apbb2/Bmp7/Camk2n1/Cdk5r1/Cdk5rap2/Ctnnb1/Dab2ip/Eme2/Fgfr3/Fzd9/Grb14/H2afy/Ints7/Jade1/Notch1/Ptpn11/Rps6ka2/Scrib/Sox4/Thoc1/Trp53i13/Wdr76/Zfp207
GO:0022600	digestive system process	0.203657	7	Ezr/Ghrl/Hip1r/Kcnma1/Pawr/Tlr9/Vil1
GO:0016311	dephosphorylation	0.20418	22	Acpp/Camta1/Dusp16/Elfn1/Epm2a/Farp1/Hpn/Htt/Pawr/Pin1/Ppargc1b/Ppp1r27/Ppp2r2c/Ppp2r5a/Ppp4c/Ppp6r3/Ptp4a2/Ptpn11/Ptpn13/Ptprm/Ptprr/Ptprt
GO:0031570	DNA integrity checkpoint	0.204194	6	Eme2/Ints7/Ptpn11/Sox4/Thoc1/Wdr76
GO:0050805	negative regulation of synaptic transmission	0.204194	6	Drd5/Kcnq4/Shank2/Slc24a2/Slc6a1/Sorcs3
GO:0072091	regulation of stem cell proliferation	0.204194	6	Ctnnb1/Dct/Nfatc1/Notch1/Six3/Tbx3
GO:0031330	negative regulation of cellular catabolic process	0.204917	14	Akt1/Becn1/Chmp4b/Clec16a/Dab2ip/Fam192a/Mcl1/Nbas/Ptk2/Qsox1/Senp1/Smarcc1/Tbc1d14/Usp30
GO:0050768	negative regulation of neurogenesis	0.205563	20	Aatk/Adcy6/Asap1/Bmp7/Cdk5r1/Cdk5rap2/Ctnnb1/Disp3/Fgfr3/Id4/Notch1/Ntm/Ntn1/Ptk2/Rap1gap/Rapgef2/Six3/Trpv4/Wnt7b/Xylt1
GO:1990778	protein localization to cell periphery	0.205563	20	Adcy6/Akt1/Cacnb2/Cacng2/Camk2a/Dpp6/Ezr/Grin2a/Grip1/Nptxr/Nsf/Ppp2r5a/Prkg2/Ramp1/Rapgef2/Rtkn/Scrib/Stac/Vil1/Zdhhc22
GO:0071375	cellular response to peptide hormone stimulus	0.205779	15	Adcy6/Akt1/Camk2a/Cav2/Ccnd3/Ctnnb1/Grb14/Nr4a3/Otop1/Ptk2/Ptpn11/Slc9a1/Smarcc1/Srebf1/Stxbp4
GO:0098657	import into cell	0.206297	38	Abr/Adgrb1/Atp1a3/Atp9a/Becn1/Cacng2/Cav2/Cnn2/Dnm2/Dock1/Egf/Ezr/Grk3/Hap1/Hip1/Hip1r/Hspg2/Lrp2/Mertk/Myo18a/Neurl1b/Nostrin/Nsf/Pawr/Pip5k1c/Ptk2/Ramp1/Rap1gap/Scrib/Slc6a1/Slc8a2/Slc9a1/Slc9a9/Sort1/Stab2/Tnk2/Wipf1/Xkr8
GO:0021700	developmental maturation	0.206341	18	Abhd2/Akt1/Catsperz/Cdk5r1/Cntnap2/Ctnnb1/Dab2ip/Dmc1/Epo/Fgfr3/Grb14/Kcnma1/Notch1/Nrcam/Rflna/Rps6ka2/Six3/Xylt1
GO:0060070	canonical Wnt signaling pathway	0.206429	17	Ankrd6/Col1a1/Ctnnb1/Dab2ip/Egf/Fgfr3/Fzd6/Fzd9/Jade1/Kremen1/Notch1/Nphp4/Pin1/Sox4/Tmem198/Wnt5b/Wnt7b
GO:0010466	negative regulation of peptidase activity	0.207273	9	Akt1/Fnip1/Htt/Ints1/Lxn/Mical1/Rffl/Spink13/Wfdc1
GO:0120039	plasma membrane bounded cell projection morphogenesis	0.208188	39	Aatk/Apbb2/Artn/Bmp7/Camk2a/Cdk5r1/Celsr3/Cntnap2/Crabp2/Ctnnb1/Cux1/Dab2ip/Dclk1/Dnm2/Dscam/Dscaml1/Efna4/Farp1/Fgfr3/Grip1/Ispd/Limk1/Lrp2/Matn2/Notch1/Nr4a3/Nrcam/Ntn1/Omg/Pip5k1c/Plxna4/Plxnc1/Ptk2/Ptpn11/Ptprm/Rapgef2/Shank2/Vil1/Wnt7b
GO:0006897	endocytosis	0.208978	32	Abr/Adgrb1/Atp9a/Becn1/Cacng2/Cav2/Cnn2/Dnm2/Dock1/Egf/Ezr/Grk3/Hap1/Hip1/Hip1r/Hspg2/Lrp2/Mertk/Myo18a/Neurl1b/Nostrin/Nsf/Pip5k1c/Ptk2/Ramp1/Rap1gap/Scrib/Sort1/Stab2/Tnk2/Wipf1/Xkr8
GO:0051272	positive regulation of cellular component movement	0.208978	32	Adam8/Adam9/Akt1/Aldoa/Angpt4/Bcas3/Bmp7/Capn7/Carmil2/Col18a1/Col1a1/Cxcl17/Dab2ip/Dock1/Dock8/Dscam/Egf/Fam89b/Il6st/Jun/Lgr6/Mylk/Notch1/Nr4a3/Ntn1/Pawr/Ptk2/Rapgef2/Snai1/Trpv4/Vil1/Wnt5b
GO:0001895	retina homeostasis	0.209794	4	Nphp4/Ush1c/Ush2a/Whrn
GO:0006766	vitamin metabolic process	0.209794	4	Acpp/Fgfr4/Lrp2/Snai1
GO:0019228	neuronal action potential	0.209794	4	Cacna1g/Dpp6/Kcnma1/Pawr
GO:0030835	negative regulation of actin filament depolymerization	0.209794	4	Add2/Capg/Carmil2/Vil1
GO:0032648	regulation of interferon-beta production	0.209794	4	Ptpn11/Relb/Tlr9/Zbtb20
GO:1903902	positive regulation of viral life cycle	0.209794	4	Cav2/Chmp4b/Notch1/Nr5a2
GO:2000648	positive regulation of stem cell proliferation	0.209794	4	Ctnnb1/Dct/Notch1/Tbx3
GO:0048812	neuron projection morphogenesis	0.210073	38	Aatk/Apbb2/Artn/Bmp7/Camk2a/Cdk5r1/Celsr3/Cntnap2/Crabp2/Ctnnb1/Cux1/Dab2ip/Dclk1/Dnm2/Dscam/Dscaml1/Efna4/Farp1/Fgfr3/Grip1/Ispd/Limk1/Lrp2/Matn2/Notch1/Nr4a3/Nrcam/Ntn1/Omg/Pip5k1c/Plxna4/Plxnc1/Ptk2/Ptpn11/Ptprm/Rapgef2/Shank2/Wnt7b
GO:0045861	negative regulation of proteolysis	0.211506	14	Akt1/Camk2n1/Clec16a/Fam192a/Fnip1/Htt/Ints1/Lxn/Mical1/Rffl/Senp1/Smarcc1/Spink13/Wfdc1
GO:0043434	response to peptide hormone	0.212049	18	Adcy6/Akt1/Camk2a/Cav2/Ccnd3/Ctnnb1/Eif2b5/Grb14/Nr4a3/Otop1/Ptk2/Ptpn11/Slc9a1/Smarcc1/Sort1/Srebf1/Stxbp4/Trpv4
GO:0007015	actin filament organization	0.213238	23	Actn1/Add2/Capg/Carmil2/Ezr/Fhod3/Ghrl/Hip1/Hip1r/Limk1/Map3k1/Mical1/Mtss1/Myom3/Nebl/Pawr/Ppargc1b/Rflna/Trpv4/Ush1c/Vil1/Washc3/Wipf1
GO:0002089	lens morphogenesis in camera-type eye	0.21336	3	Ctnnb1/Fgfr3/Six3
GO:0010803	regulation of tumor necrosis factor-mediated signaling pathway	0.21336	3	Rffl/Spata2/Traf2
GO:0045824	negative regulation of innate immune response	0.21336	3	Otop1/Slamf8/Tap2
GO:0060479	lung cell differentiation	0.21336	3	Ctnnb1/Ncor2/Sav1
GO:0060914	heart formation	0.21336	3	Ctnnb1/Lrp2/Notch1
GO:0061037	negative regulation of cartilage development	0.21336	3	Adamts12/Ctnnb1/Rflna
GO:0070873	regulation of glycogen metabolic process	0.21336	3	Akt1/Gfpt1/Phlda2
GO:1901385	regulation of voltage-gated calcium channel activity	0.21336	3	Cacnb2/Cbarp/Stac
GO:1905517	macrophage migration	0.21336	3	Cxcl17/Slamf8/Trpv4
GO:0034446	substrate adhesion-dependent cell spreading	0.213776	7	Antxr1/Dnm2/Dock1/Lims1/Mertk/Ptk2/St6gal1
GO:1902850	microtubule cytoskeleton organization involved in mitosis	0.213776	7	Bora/Cdk5rap2/Chmp4b/Htt/Msto1/Poc1a/Zfp207
GO:0016239	positive regulation of macroautophagy	0.214806	5	Becn1/Clec16a/Epm2a/Htt/Irgm1
GO:0045600	positive regulation of fat cell differentiation	0.214806	5	Akt1/Mecom/Sav1/Wnt5b/Zbtb16
GO:0048278	vesicle docking	0.214806	5	Camk2a/Cav2/Nsf/Stx11/Stx12
GO:0035304	regulation of protein dephosphorylation	0.215419	6	Camta1/Htt/Pawr/Pin1/Ppp2r5a/Ppp6r3
GO:0050906	detection of stimulus involved in sensory perception	0.215419	6	Grin2b/Hpn/Lxn/Pawr/Piezo2/Pkd2l1
GO:0048858	cell projection morphogenesis	0.215706	39	Aatk/Apbb2/Artn/Bmp7/Camk2a/Cdk5r1/Celsr3/Cntnap2/Crabp2/Ctnnb1/Cux1/Dab2ip/Dclk1/Dnm2/Dscam/Dscaml1/Efna4/Farp1/Fgfr3/Grip1/Ispd/Limk1/Lrp2/Matn2/Notch1/Nr4a3/Nrcam/Ntn1/Omg/Pip5k1c/Plxna4/Plxnc1/Ptk2/Ptpn11/Ptprm/Rapgef2/Shank2/Vil1/Wnt7b
GO:0000819	sister chromatid segregation	0.215942	9	Becn1/Cdk5rap2/Chmp4b/Ctnnb1/H2afy/Msto1/Nek6/Rmi2/Zfp207
GO:0050821	protein stabilization	0.215942	9	Apbb2/Hip1/Hip1r/Pin1/Sav1/Sox4/Stx12/Stxbp4/Zfp207
GO:0035051	cardiocyte differentiation	0.21612	12	Bmp7/Ctnnb1/Fhod3/Myo18b/Myom3/Nebl/Notch1/Pin1/Rxra/Slc9a1/Tbx3/Tenm4
GO:0098813	nuclear chromosome segregation	0.21612	12	Becn1/Cdk5rap2/Chmp4b/Ctnnb1/Dmc1/Eme2/Ercc4/H2afy/Msto1/Nek6/Rmi2/Zfp207
GO:0050890	cognition	0.217168	19	Atp1a3/Cacna1c/Cntnap2/Drd5/Epm2a/Fzd9/Ghrl/Grin2a/Grin2b/Grm4/Hrh1/Htt/Jun/Ntan1/Shank2/Slc24a2/Slc6a1/Slc8a2/Sorcs3
GO:0007059	chromosome segregation	0.218188	14	Becn1/Cdk5rap2/Chmp4b/Chtf18/Ctnnb1/Dmc1/Eme2/Ercc4/H2afy/Hjurp/Msto1/Nek6/Rmi2/Zfp207
GO:0043523	regulation of neuron apoptotic process	0.218188	14	Adam8/Casp6/Cdk5r1/Ctnnb1/Fgfr3/Fzd9/Htt/Jun/Kcnma1/Mcl1/Nr4a3/Pawr/Pin1/Ube2v2
GO:0032535	regulation of cellular component size	0.218283	23	Aatk/Add2/Akt1/Capg/Carmil2/Cdk5r1/Crabp2/Dnm2/Dscam/Ezr/Fhod3/Hip1r/Kcnma1/Limk1/Map3k1/Ntn1/Omg/Plxna4/Prkg2/Ush1c/Vil1/Wipf1/Wnt7b
GO:0010564	regulation of cell cycle process	0.218425	29	Becn1/Bmp7/Bora/Ccnd3/Ccnj/Cdk5r1/Cdk5rap2/Cep131/Chmp4b/Ctnnb1/Dab2ip/Egf/Fgfr3/Fzd9/Grb14/H2afy/Jade1/Nek6/Pik3r4/Pin1/Poc1a/Rad51b/Rmi2/Rps6ka2/Six3/Sox4/Sstr5/Stxbp4/Zfp207
GO:0006470	protein dephosphorylation	0.218541	15	Camta1/Dusp16/Epm2a/Htt/Pawr/Pin1/Ppp2r2c/Ppp2r5a/Ppp6r3/Ptp4a2/Ptpn11/Ptpn13/Ptprm/Ptprr/Ptprt
GO:1901652	response to peptide	0.221849	20	Adcy6/Akt1/Atp1a3/Camk2a/Cav2/Ccnd3/Ctnnb1/Eif2b5/Grb14/Notch1/Nr4a3/Otop1/Ptk2/Ptpn11/Slc9a1/Smarcc1/Sort1/Srebf1/Stxbp4/Trpv4
GO:0048469	cell maturation	0.221907	11	Abhd2/Catsperz/Cntnap2/Ctnnb1/Dmc1/Epo/Grb14/Kcnma1/Nrcam/Rps6ka2/Six3
GO:1903050	regulation of proteolysis involved in cellular protein catabolic process	0.221907	11	Akt1/Clec16a/Dab2ip/Egf/Fam192a/Osbpl7/Ptk2/Rhbdf1/Senp1/Smarcc1/Ube2v2
GO:0051098	regulation of binding	0.223383	23	Add2/Akt1/Amfr/Ctnnb1/Dab2ip/Egf/Ercc4/Fam192a/Hip1r/Hjurp/Hspa4/Ica1/Id4/Jun/Mapre3/Nvl/Phlda2/Pin1/Plcl1/Rap1gap/Rapgef2/Traf2/Zfpm1
GO:2000147	positive regulation of cell motility	0.223549	31	Adam8/Adam9/Akt1/Aldoa/Angpt4/Bcas3/Bmp7/Capn7/Carmil2/Col18a1/Col1a1/Cxcl17/Dab2ip/Dock1/Dock8/Egf/Fam89b/Il6st/Jun/Lgr6/Mylk/Notch1/Nr4a3/Ntn1/Pawr/Ptk2/Rapgef2/Snai1/Trpv4/Vil1/Wnt5b
GO:0008637	apoptotic mitochondrial changes	0.224075	7	Akt1/Camk2a/Dap3/Hip1r/Jun/Map3k1/Mcl1
GO:0035725	sodium ion transmembrane transport	0.224075	7	Atp1a3/Dnm2/Fxyd2/Pkd2l1/Slc8a2/Slc9a1/Slc9a9
GO:0002792	negative regulation of peptide secretion	0.224751	9	Ezr/Ghrl/Hadh/Midn/Oit1/Pim3/Ptpn11/Rhbdf1/Srebf1
GO:0048638	regulation of developmental growth	0.224798	22	Aatk/Akt1/Cacna1c/Cdk5r1/Crabp2/Dnm2/Dscam/Ezr/Fgfr3/Gamt/Limk1/Notch1/Ntn1/Omg/Phlda2/Pin1/Plxna4/Ptk2/Ptpn11/Rai1/Sav1/Vil1
GO:0014014	negative regulation of gliogenesis	0.224845	4	Ctnnb1/Fgfr3/Id4/Notch1
GO:0032608	interferon-beta production	0.224845	4	Ptpn11/Relb/Tlr9/Zbtb20
GO:0033173	calcineurin-NFAT signaling cascade	0.224845	4	Camta1/Homer3/Nfatc1/Slc9a1
GO:0048713	regulation of oligodendrocyte differentiation	0.224845	4	Ctnnb1/Id4/Notch1/Tenm4
GO:0051926	negative regulation of calcium ion transport	0.224845	4	Cbarp/Epo/Pawr/Tlr9
GO:0061912	selective autophagy	0.224845	4	Becn1/Clec16a/Htt/Usp30
GO:0046777	protein autophosphorylation	0.224959	14	Aatk/Blk/Camk2a/Fgfr3/Fgfr4/Jun/Nek6/Obscn/Pim3/Ppp2r5a/Prkg2/Ptk2/Tnk2/Tssk2
GO:0002791	regulation of peptide secretion	0.225279	25	Adam9/Blk/Carmil2/Casr/Crtam/Egf/Ezr/Ghrl/Hadh/Ica1/Midn/Myo18a/Nadk/Oit1/Pim3/Ptpn11/Rhbdf1/Sox4/Srebf1/Sstr5/Stxbp4/Tlr5/Tlr9/Traf2/Trpv4
GO:0009611	response to wounding	0.225279	25	Abhd2/Carmil2/Celsr1/Cnn2/Col1a1/Drd5/Fgfr3/Fzd6/Fzd9/Grin2a/Jun/Lgr6/Map3k1/Matn2/Mertk/Mylk/Ninj2/Omg/Pip5k1c/Ppl/Scrib/Tmprss4/Vil1/Wfdc1/Xylt1
GO:0001959	regulation of cytokine-mediated signaling pathway	0.226849	6	Il6st/Irgm1/Otop1/Rffl/Spata2/Traf2
GO:0051289	protein homotetramerization	0.226849	6	Acpp/Dctpp1/Gfpt1/Kcnma1/Pcbd2/Rxra
GO:0060976	coronary vasculature development	0.226849	6	Ctnnb1/Dnm2/Epo/Lrp2/Notch1/Rxra
GO:0002790	peptide secretion	0.227929	31	Adam9/Blk/Cacna1c/Card11/Carmil2/Casr/Crtam/Egf/Ezr/Ghrl/Hadh/Htt/Ica1/Mafa/Midn/Myo18a/Nadk/Notch1/Oit1/Pim3/Ptpn11/Rcn3/Rhbdf1/Sox4/Srebf1/Sstr5/Stxbp4/Tlr5/Tlr9/Traf2/Trpv4
GO:0048667	cell morphogenesis involved in neuron differentiation	0.228012	35	Aatk/Apbb2/Artn/Bmp7/Camk2a/Cdk5r1/Celsr3/Crabp2/Cux1/Dclk1/Dnm2/Dscam/Dscaml1/Efna4/Farp1/Fgfr3/Ispd/Limk1/Matn2/Notch1/Nr4a3/Nrcam/Ntn1/Omg/Pip5k1c/Plxna4/Plxnc1/Ptk2/Ptpn11/Ptprm/Rapgef2/Scrib/Shank2/Whrn/Wnt7b
GO:0001832	blastocyst growth	0.228246	2	Ints1/Rad51b
GO:0001975	response to amphetamine	0.228246	2	Drd5/Grin2a
GO:0002724	regulation of T cell cytokine production	0.228246	2	Malt1/Traf2
GO:0003180	aortic valve morphogenesis	0.228246	2	Nfatc1/Notch1
GO:0003198	epithelial to mesenchymal transition involved in endocardial cushion formation	0.228246	2	Notch1/Snai1
GO:0007063	regulation of sister chromatid cohesion	0.228246	2	Ctnnb1/H2afy
GO:0010575	positive regulation of vascular endothelial growth factor production	0.228246	2	Cxcl17/Sulf1
GO:0010592	positive regulation of lamellipodium assembly	0.228246	2	Carmil2/Dnm2
GO:0032509	endosome transport via multivesicular body sorting pathway	0.228246	2	Sort1/Tmem50b
GO:0032897	negative regulation of viral transcription	0.228246	2	Jun/Trim8
GO:0034311	diol metabolic process	0.228246	2	Pcbd2/Pts
GO:0034695	response to prostaglandin E	0.228246	2	Adcy6/Akt1
GO:0036336	dendritic cell migration	0.228246	2	Dock8/Slamf8
GO:0042119	neutrophil activation	0.228246	2	Abr/Stx11
GO:0043923	positive regulation by host of viral transcription	0.228246	2	Hpn/Jun
GO:0044273	sulfur compound catabolic process	0.228246	2	Ggt5/Pcyox1
GO:0045737	positive regulation of cyclin-dependent protein serine/threonine kinase activity	0.228246	2	Ccnd3/Mapre3
GO:0048711	positive regulation of astrocyte differentiation	0.228246	2	Il6st/Notch1
GO:0050857	positive regulation of antigen receptor-mediated signaling pathway	0.228246	2	Cmtm3/Nectin2
GO:0050860	negative regulation of T cell receptor signaling pathway	0.228246	2	Ezr/Pawr
GO:0050901	leukocyte tethering or rolling	0.228246	2	Add2/Pawr
GO:0051770	positive regulation of nitric-oxide synthase biosynthetic process	0.228246	2	Map2k6/Tlr9
GO:0060413	atrial septum morphogenesis	0.228246	2	Sox4/Zfpm1
GO:0061029	eyelid development in camera-type eye	0.228246	2	Jun/Map3k1
GO:0062033	positive regulation of mitotic sister chromatid segregation	0.228246	2	Becn1/H2afy
GO:0071801	regulation of podosome assembly	0.228246	2	Asap1/Palld
GO:0080111	DNA demethylation	0.228246	2	Stpg4/Tet2
GO:0090335	regulation of brown fat cell differentiation	0.228246	2	Mecom/Trpv4
GO:0098974	postsynaptic actin cytoskeleton organization	0.228246	2	Adgrb1/Farp1
GO:0099188	postsynaptic cytoskeleton organization	0.228246	2	Adgrb1/Farp1
GO:0140058	neuron projection arborization	0.228246	2	Grip1/Lrp2
GO:1900120	regulation of receptor binding	0.228246	2	Phlda2/Plcl1
GO:0031329	regulation of cellular catabolic process	0.230184	34	Abcd2/Adam8/Adam9/Akt1/Becn1/Chmp4b/Clec16a/Dab2ip/Depp1/Egf/Epm2a/Ercc4/Ezr/Fam192a/Htt/Irgm1/Mcl1/Mtcl1/Nbas/Osbpl7/Ptk2/Qsox1/Rhbdf1/Samd4/Senp1/Smarcc1/Srebf1/Tbc1d14/Tlr9/Tnrc6b/Trim8/Ube2v2/Usp30/Zbtb20
GO:0001894	tissue homeostasis	0.231638	13	Adam8/Chmp4b/Col11a2/Ctnnb1/Notch1/Nphp4/Ppargc1b/Ptpn11/Rcn3/Tlr9/Ush1c/Ush2a/Whrn
GO:0000096	sulfur amino acid metabolic process	0.23216	3	Cbs/Ggt5/Pcyox1
GO:0003171	atrioventricular valve development	0.23216	3	Notch1/Sox4/Zfpm1
GO:0003203	endocardial cushion morphogenesis	0.23216	3	Bmp7/Notch1/Snai1
GO:0006509	membrane protein ectodomain proteolysis	0.23216	3	Adam8/Adam9/Sppl2b
GO:0007257	activation of JUN kinase activity	0.23216	3	Dab2ip/Map3k1/Wnt7b
GO:0010092	specification of animal organ identity	0.23216	3	Ctnnb1/Fgfr4/Lrp2
GO:0045923	positive regulation of fatty acid metabolic process	0.23216	3	Abcd2/Nr4a3/Srebf1
GO:0046686	response to cadmium ion	0.23216	3	Akt1/Jun/Mtf1
GO:0048011	neurotrophin TRK receptor signaling pathway	0.23216	3	Hap1/Ptpn11/Sort1
GO:0048730	epidermis morphogenesis	0.23216	3	Ctnnb1/Notch1/Snai1
GO:0097300	programmed necrotic cell death	0.23216	3	Pygl/Spata2/Traf2
GO:2000008	regulation of protein localization to cell surface	0.23216	3	Akt1/Ctnnb1/Egf
GO:0045667	regulation of osteoblast differentiation	0.233693	9	Bmp7/Cebpd/Ctnnb1/Id4/Il6st/Nfatc1/Notch1/Ptk2/Wnt7b
GO:0030335	positive regulation of cell migration	0.234493	30	Adam8/Adam9/Akt1/Aldoa/Angpt4/Bcas3/Bmp7/Capn7/Carmil2/Col18a1/Col1a1/Cxcl17/Dab2ip/Dock1/Dock8/Egf/Fam89b/Il6st/Jun/Lgr6/Mylk/Notch1/Nr4a3/Pawr/Ptk2/Rapgef2/Snai1/Trpv4/Vil1/Wnt5b
GO:1901605	alpha-amino acid metabolic process	0.237758	11	Cbs/Cyp2d22/Dct/Gamt/Gfpt1/Ggt5/Hal/Htt/Icmt/Sardh/Sephs1
GO:0006112	energy reserve metabolic process	0.238469	6	Akt1/Epm2a/Gfpt1/Il6st/Phlda2/Pygl
GO:0048844	artery morphogenesis	0.238469	6	Ctnnb1/Lrp2/Mylk/Notch1/Sox4/Zmiz1
GO:0071346	cellular response to interferon-gamma	0.238469	6	Capg/Irgm1/Myo18a/Otop1/Stx11/Stxbp4
GO:1900407	regulation of cellular response to oxidative stress	0.238469	6	Ctnnb1/Erp27/Mcl1/Nr4a3/Pawr/Tldc1
GO:0002573	myeloid leukocyte differentiation	0.238593	12	Adam8/Ctnnb1/Efna4/Fgfr3/Jun/Nfatc1/Ocstamp/Ppargc1b/Relb/Sh3pxd2a/Tmem178/Zfpm1
GO:0010632	regulation of epithelial cell migration	0.238761	14	Adam9/Adgrb1/Akt1/Angpt4/Bcas3/Capn7/Dab2ip/Dock1/Jun/Notch1/Ptk2/Ptprm/Ptprr/Vil1
GO:0140014	mitotic nuclear division	0.238886	13	Becn1/Bmp7/Bora/Ccnd3/Ccnj/Cdk5rap2/Chmp4b/Egf/Fgfr3/H2afy/Msto1/Nek6/Zfp207
GO:0008286	insulin receptor signaling pathway	0.239543	8	Akt1/Cav2/Ccnd3/Grb14/Ptpn11/Smarcc1/Srebf1/Stxbp4
GO:0090090	negative regulation of canonical Wnt signaling pathway	0.239543	8	Ankrd6/Dab2ip/Fzd6/Jade1/Kremen1/Notch1/Nphp4/Wnt5b
GO:0003197	endocardial cushion development	0.240163	4	Bmp7/Erg/Notch1/Snai1
GO:0038066	p38MAPK cascade	0.240163	4	Dab2ip/Ezr/Fgfr3/Map3k4
GO:0043462	regulation of ATPase activity	0.240163	4	Casr/Dnal4/Dnm2/Tlr9
GO:0048483	autonomic nervous system development	0.240163	4	Ctnnb1/Phactr4/Plxna4/Sox4
GO:0003012	muscle system process	0.240857	22	Aldoa/Atp1a3/Becn1/Cacna1c/Cacna1g/Cacnb2/Ghrl/Kcnma1/Kcnn2/Map2k6/Mylk/Myom3/Nfatc1/Notch1/Nr4a3/Pawr/Pin1/Ptk2/Rap1gds1/Slc9a1/Stac/Sulf1
GO:0031060	regulation of histone methylation	0.240878	5	Ctcfl/Ctnnb1/H2afy/Kdm4b/Nelfa
GO:0031646	positive regulation of neurological system process	0.240878	5	Grin2a/Igsf9b/Pawr/Shank2/Tenm4
GO:0035904	aorta development	0.240878	5	Dnm2/Lrp2/Mylk/Notch1/Sox4
GO:0007613	memory	0.242761	9	Atp1a3/Grin2a/Grin2b/Hrh1/Ntan1/Shank2/Slc24a2/Slc8a2/Sorcs3
GO:0051262	protein tetramerization	0.242761	9	Acpp/Dctpp1/Gfpt1/Grin2a/Grin2b/Kcnma1/Me1/Pcbd2/Rxra
GO:1901653	cellular response to peptide	0.244086	16	Adcy6/Akt1/Atp1a3/Camk2a/Cav2/Ccnd3/Ctnnb1/Grb14/Nr4a3/Otop1/Ptk2/Ptpn11/Slc9a1/Smarcc1/Srebf1/Stxbp4
GO:0044782	cilium organization	0.245052	15	Asap1/Celsr3/Cep131/Dnah8/Dnm2/Hap1/Htt/Kctd17/Nectin2/Nme7/Poc1a/Rab3ip/Tbc1d30/Tekt2/Wdr34
GO:0051402	neuron apoptotic process	0.245052	15	Aatk/Adam8/Casp6/Cdk5r1/Ctnnb1/Fgfr3/Fzd9/Htt/Jun/Kcnma1/Mcl1/Nr4a3/Pawr/Pin1/Ube2v2
GO:0016525	negative regulation of angiogenesis	0.245169	7	Adgrb1/Angpt4/Ctnnb1/Dab2ip/Notch1/Ptprm/Sulf1
GO:0003013	circulatory system process	0.245334	25	Abr/Adcy6/Akt1/Atp1a3/Cacna1c/Cacna1g/Cacnb2/Casr/Cbs/Drd5/Ghrl/Heg1/Hrh1/Kcnma1/Kcnn2/Manf/Map2k6/Ptk2/Ptprm/Rap1gds1/Rps6ka2/Slc4a5/Slc9a1/Srebf1/Trpv4
GO:0010948	negative regulation of cell cycle process	0.245839	11	Bmp7/Cdk5rap2/Dab2ip/Fgfr3/Fzd9/Grb14/H2afy/Jade1/Rps6ka2/Sox4/Zfp207
GO:0008154	actin polymerization or depolymerization	0.246278	12	Add2/Capg/Carmil2/Fhod3/Ghrl/Hip1r/Map3k1/Mical1/Mtss1/Vil1/Washc3/Wipf1
GO:0010721	negative regulation of cell development	0.246317	22	Aatk/Adcy6/Asap1/Bmp7/Cdk5r1/Cdk5rap2/Ctnnb1/Disp3/Fgfr3/Grb14/Id4/Notch1/Ntm/Ntn1/Ptk2/Rap1gap/Rapgef2/Rflna/Six3/Trpv4/Wnt7b/Xylt1
GO:0044089	positive regulation of cellular component biogenesis	0.248392	28	Adgrb1/Adgrl2/Asap1/Bcas3/Becn1/Bmp7/Carmil2/Cdk5rap2/Ctnnb1/Dnm2/Fnip1/Ghrl/Hap1/Hip1r/Htt/Jun/Kctd17/Limk1/Lims1/Lrrc4b/Map3k1/Mtss1/Nphp4/Palld/Trabd2b/Ube2v2/Vil1/Wipf1
GO:0052547	regulation of peptidase activity	0.249263	17	Akt1/Antxr1/Fnip1/Grin2b/Hip1/Hip1r/Htt/Ints1/Lxn/Mical1/Mtch1/Pawr/Rcn3/Rffl/Senp1/Spink13/Wfdc1
GO:0050886	endocrine process	0.250264	6	Drd5/Fgfr4/Ghrl/Ptpn11/Rps6ka2/Tbx3
GO:1903426	regulation of reactive oxygen species biosynthetic process	0.250264	6	Abcd2/Adgrb1/Akt1/Dnm2/Hrh1/Tlr5
GO:0001913	T cell mediated cytotoxicity	0.251242	3	Nectin2/Stx11/Tap2
GO:0018023	peptidyl-lysine trimethylation	0.251242	3	Kdm4b/Setd4/Tet2
GO:0018345	protein palmitoylation	0.251242	3	Zdhhc12/Zdhhc22/Zdhhc3
GO:0030071	regulation of mitotic metaphase/anaphase transition	0.251242	3	Cdk5rap2/Nek6/Zfp207
GO:0032885	regulation of polysaccharide biosynthetic process	0.251242	3	Akt1/Egf/Gfpt1
GO:0042398	cellular modified amino acid biosynthetic process	0.251242	3	Gamt/Ggt5/Mthfd1l
GO:0048147	negative regulation of fibroblast proliferation	0.251242	3	B4galt7/Dab2ip/Pawr
GO:0048596	embryonic camera-type eye morphogenesis	0.251242	3	Bmp7/Phactr4/Six3
GO:0071158	positive regulation of cell cycle arrest	0.251242	3	Cdk5r1/Dab2ip/Sox4
GO:0086010	membrane depolarization during action potential	0.251242	3	Cacna1c/Cacna1g/Cacnb2
GO:0098698	postsynaptic specialization assembly	0.251242	3	Lrrc4b/Nptxr/Shank2
GO:0099633	protein localization to postsynaptic specialization membrane	0.251242	3	Cacng2/Camk2a/Nptxr
GO:0099645	neurotransmitter receptor localization to postsynaptic specialization membrane	0.251242	3	Cacng2/Camk2a/Nptxr
GO:0006520	cellular amino acid metabolic process	0.252889	14	Cbs/Cyp2d22/Dct/Gamt/Gatb/Gfpt1/Ggt5/Hal/Htt/Icmt/Pcyox1/Rars/Sardh/Sephs1
GO:0030041	actin filament polymerization	0.253389	10	Add2/Capg/Carmil2/Fhod3/Hip1r/Map3k1/Mtss1/Vil1/Washc3/Wipf1
GO:0016236	macroautophagy	0.254019	11	Becn1/Chmp4b/Clec16a/Epm2a/Htt/Irgm1/Pik3r4/Qsox1/Stx12/Tbc1d14/Usp30
GO:0000041	transition metal ion transport	0.254222	5	Dnm2/Hrh1/Slc25a37/Slc39a13/Slc39a3
GO:0002418	immune response to tumor cell	0.254798	2	Crtam/Nectin2
GO:0003176	aortic valve development	0.254798	2	Nfatc1/Notch1
GO:0006312	mitotic recombination	0.254798	2	Dmc1/Ercc4
GO:0006883	cellular sodium ion homeostasis	0.254798	2	Atp1a3/Slc9a1
GO:0007094	mitotic spindle assembly checkpoint	0.254798	2	Cdk5rap2/Zfp207
GO:0007638	mechanosensory behavior	0.254798	2	Cntnap2/Htt
GO:0010996	response to auditory stimulus	0.254798	2	Cntnap2/Htt
GO:0014075	response to amine	0.254798	2	Drd5/Grin2a
GO:0031061	negative regulation of histone methylation	0.254798	2	H2afy/Kdm4b
GO:0034694	response to prostaglandin	0.254798	2	Adcy6/Akt1
GO:0036342	post-anal tail morphogenesis	0.254798	2	Chst11/Fgfr3
GO:0042430	indole-containing compound metabolic process	0.254798	2	Cyp2d22/Grin2a
GO:0043931	ossification involved in bone maturation	0.254798	2	Rflna/Xylt1
GO:0045723	positive regulation of fatty acid biosynthetic process	0.254798	2	Abcd2/Srebf1
GO:0046596	regulation of viral entry into host cell	0.254798	2	Nectin2/Trim8
GO:0048240	sperm capacitation	0.254798	2	Abhd2/Catsperz
GO:0048712	negative regulation of astrocyte differentiation	0.254798	2	Fgfr3/Id4
GO:0050961	detection of temperature stimulus involved in sensory perception	0.254798	2	Lxn/Pawr
GO:0050965	detection of temperature stimulus involved in sensory perception of pain	0.254798	2	Lxn/Pawr
GO:0050966	detection of mechanical stimulus involved in sensory perception of pain	0.254798	2	Grin2b/Pawr
GO:0051043	regulation of membrane protein ectodomain proteolysis	0.254798	2	Adam8/Adam9
GO:0060123	regulation of growth hormone secretion	0.254798	2	Ghrl/Ptpn11
GO:0060456	positive regulation of digestive system process	0.254798	2	Ghrl/Pawr
GO:0070129	regulation of mitochondrial translation	0.254798	2	Mrps27/Mtg2
GO:0070886	positive regulation of calcineurin-NFAT signaling cascade	0.254798	2	Camta1/Slc9a1
GO:0071173	spindle assembly checkpoint	0.254798	2	Cdk5rap2/Zfp207
GO:0071174	mitotic spindle checkpoint	0.254798	2	Cdk5rap2/Zfp207
GO:0071625	vocalization behavior	0.254798	2	Cntnap2/Shank2
GO:0085029	extracellular matrix assembly	0.254798	2	Antxr1/Notch1
GO:0098962	regulation of postsynaptic neurotransmitter receptor activity	0.254798	2	Homer3/Nptxr
GO:0106058	positive regulation of calcineurin-mediated signaling	0.254798	2	Camta1/Slc9a1
GO:1901020	negative regulation of calcium ion transmembrane transporter activity	0.254798	2	Cbarp/Tlr9
GO:2000810	regulation of bicellular tight junction assembly	0.254798	2	Nphp4/Snai1
GO:2001224	positive regulation of neuron migration	0.254798	2	Dab2ip/Rapgef2
GO:0030155	regulation of cell adhesion	0.255015	36	Adam8/Adam9/Akt1/Bcas3/Bmp7/Card11/Carmil2/Col1a1/Dnm2/Dock1/Dock8/Dscam/Dscaml1/Egflam/Epo/Fbln2/Il6st/Jam2/Kif26b/Lims1/Malt1/Notch1/Nr4a3/Pawr/Pik3r6/Plekha2/Plxna4/Plxnc1/Podxl/Ptk2/Ptpn11/Rap1gap/St6gal1/Trpv4/Zbtb16/Zmiz1
GO:0006334	nucleosome assembly	0.25571	4	H2afy/Hjurp/Ipo4/Shprh
GO:0051972	regulation of telomerase activity	0.25571	4	Ctnnb1/Map3k4/Nek7/Nvl
GO:0070206	protein trimerization	0.25571	4	Col1a1/Gna11/Pkd2l1/Traf2
GO:0010565	regulation of cellular ketone metabolic process	0.255941	7	Abcd2/Akt1/Fgfr4/Kcnma1/Ncor2/Nr4a3/Srebf1
GO:0010959	regulation of metal ion transport	0.257391	22	Akt1/Cacna1g/Cacnb2/Camk2a/Casr/Cbarp/Cracr2a/Ctnnb1/Dnm2/Dpp6/Egf/Epo/Fxyd2/Hap1/Homer3/Htt/Mylk/Pawr/Rcvrn/Slc9a1/Stac/Tlr9
GO:0007281	germ cell development	0.260068	14	Abhd2/Akt1/Amh/Catsperz/Cep131/Ctnnb1/Dmc1/Grb14/Nectin2/Pacrg/Rps6ka2/Six5/Tssk2/Zbtb16
GO:0008202	steroid metabolic process	0.260068	14	Abca2/Cyp2d22/Disp3/Ebpl/Fdft1/Fgfr4/Hrh1/Hsd17b4/Kcnma1/Lbr/Nr5a2/Snai1/Srebf1/Tm7sf2
GO:0061136	regulation of proteasomal protein catabolic process	0.261252	9	Akt1/Clec16a/Dab2ip/Fam192a/Osbpl7/Rhbdf1/Senp1/Smarcc1/Ube2v2
GO:0051054	positive regulation of DNA metabolic process	0.261916	12	Akt1/Chtf18/Ciz1/Ctnnb1/Egf/Fgfr4/Jun/Map3k4/Nek7/Nvl/Stpg4/Ube2v2
GO:0009749	response to glucose	0.262137	10	Casp6/Eif2b5/Ghrl/Mafa/Nadk/Pim3/Sox4/Srebf1/Stxbp4/Zbtb20
GO:0034612	response to tumor necrosis factor	0.262137	10	Adam9/Adamts12/Akt1/Card14/Dab2ip/Lims1/Ocstamp/Rffl/Spata2/Traf2
GO:0048592	eye morphogenesis	0.262293	11	Bmp7/Casp6/Ctnnb1/Dscam/Fgfr3/Man2a1/Phactr4/Ptprm/Scrib/Sdk1/Six3
GO:0046883	regulation of hormone secretion	0.263975	16	Blk/Casr/Fgfr4/Ghrl/Hadh/Ica1/Il11/Midn/Nadk/Oit1/Pim3/Ptpn11/Sox4/Srebf1/Sstr5/Stxbp4
GO:0098771	inorganic ion homeostasis	0.265067	37	Anpep/Atp1a3/Atp6v0a2/Atp6v0a4/Cacna1c/Cacna1g/Casr/Cxcl17/Epo/Fgfr4/Ftl2-ps/Fzd9/Ghrl/Grin2a/Grin2b/Hap1/Htt/Il6st/Kcnma1/Kctd17/Mir122/Mtss1/Pawr/Ptk2/Rap1gds1/Rhd/Slamf8/Slc24a2/Slc39a13/Slc4a11/Slc4a5/Slc8a2/Slc9a1/Slc9a8/Slc9a9/Tmem178/Trpv4
GO:1902105	regulation of leukocyte differentiation	0.265723	15	Adam8/Card11/Carmil2/Ctnnb1/Fgfr3/Jun/Malt1/Ocstamp/Pik3r6/Ppargc1b/Tlr9/Tmem178/Zbtb16/Zfpm1/Zmiz1
GO:0043244	regulation of protein complex disassembly	0.26685	7	Add2/Capg/Carmil2/Clec16a/Irgm1/Trpv4/Vil1
GO:0055017	cardiac muscle tissue growth	0.26685	7	Ctnnb1/Heg1/Notch1/Pin1/Rxra/Sav1/Tenm4
GO:1903364	positive regulation of cellular protein catabolic process	0.26685	7	Akt1/Dab2ip/Egf/Ezr/Osbpl7/Ptk2/Ube2v2
GO:0042593	glucose homeostasis	0.26732	14	Akt1/Cacna1c/Fgfr4/Ghrl/Nadk/Ncor2/Pim3/Ptpn11/Pygl/Sox4/Sstr5/Stxbp4/Trpv4/Zbtb20
GO:0043154	negative regulation of cysteine-type endopeptidase activity involved in apoptotic process	0.267742	5	Akt1/Fnip1/Ints1/Mical1/Rffl
GO:0140056	organelle localization by membrane tethering	0.267742	5	Camk2a/Cav2/Nsf/Stx11/Stx12
GO:1903321	negative regulation of protein modification by small protein conjugation or removal	0.267742	5	Adgrb1/Akt1/Ctnnb1/Limk1/Sox4
GO:0030099	myeloid cell differentiation	0.267926	20	Actn1/Adam8/Ctnnb1/Efna4/Epo/Fgfr3/Jun/Mir122/Nfatc1/Ocstamp/Ppargc1b/Ptpn11/Relb/Rhd/Senp1/Sh3pxd2a/Tet2/Tmem178/Zbtb16/Zfpm1
GO:0006935	chemotaxis	0.268033	28	Adam8/Apbb2/Artn/Bmp7/Casr/Cdk5r1/Celsr3/Cmtm3/Cxcl17/Dscam/Dscaml1/Efna4/Hrh1/Ispd/Matn2/Notch1/Nr4a3/Nrcam/Ntn1/Pip5k1c/Plxna4/Plxnc1/Ptprm/Scrib/Slamf8/St6gal1/Trpv4/Wnt7b
GO:0032872	regulation of stress-activated MAPK cascade	0.26872	13	Akt1/Cbs/Dab2ip/Ezr/Map3k1/Map3k4/Mecom/Tlr9/Tnfrsf19/Traf2/Trpv4/Wnt16/Wnt7b
GO:0070302	regulation of stress-activated protein kinase signaling cascade	0.26872	13	Akt1/Cbs/Dab2ip/Ezr/Map3k1/Map3k4/Mecom/Tlr9/Tnfrsf19/Traf2/Trpv4/Wnt16/Wnt7b
GO:0045834	positive regulation of lipid metabolic process	0.269425	8	Abcd2/Akt1/Disp3/Fgfr3/Nr4a3/Pik3r4/Srebf1/Zbtb20
GO:0033628	regulation of cell adhesion mediated by integrin	0.270541	3	Adam9/Ptk2/Ptpn11
GO:0086091	regulation of heart rate by cardiac conduction	0.270541	3	Cacna1c/Cacna1g/Cacnb2
GO:0097366	response to bronchodilator	0.270541	3	Drd5/Grin2a/Traf2
GO:1902099	regulation of metaphase/anaphase transition of cell cycle	0.270541	3	Cdk5rap2/Nek6/Zfp207
GO:0009743	response to carbohydrate	0.270655	11	Casp6/Eif2b5/Ghrl/Mafa/Nadk/Pim3/Rps6ka2/Sox4/Srebf1/Stxbp4/Zbtb20
GO:0031214	biomineral tissue development	0.27066	9	Bmp7/Col1a1/Fgfr3/Fzd9/Icmt/Mtss1/Notch1/Otop1/Rflna
GO:1902107	positive regulation of leukocyte differentiation	0.27066	9	Adam8/Carmil2/Jun/Malt1/Ocstamp/Pik3r6/Ppargc1b/Zbtb16/Zmiz1
GO:0006936	muscle contraction	0.270734	16	Aldoa/Atp1a3/Cacna1c/Cacna1g/Cacnb2/Ghrl/Kcnma1/Kcnn2/Map2k6/Mylk/Myom3/Pawr/Rap1gds1/Slc9a1/Stac/Sulf1
GO:0072659	protein localization to plasma membrane	0.270734	16	Adcy6/Akt1/Cacnb2/Camk2a/Dpp6/Ezr/Grip1/Nsf/Ppp2r5a/Prkg2/Ramp1/Rapgef2/Scrib/Stac/Vil1/Zdhhc22
GO:0061024	membrane organization	0.270822	32	Abcd2/Adam8/Adgrb1/Afg3l1/Akt1/Arfgap3/Asap1/Atp9a/Becn1/Cacng2/Camk2a/Cav2/Chmp4b/Cntnap2/Dnm2/Fzd9/Grip1/Hip1r/Hspa4/Htt/Mtss1/Mtss1l/Myo18a/Nectin2/Nrcam/Reep2/Scrib/Slc9a1/Spesp1/Stx11/Stx12/Xkr8
GO:0031644	regulation of neurological system process	0.27098	10	Acpp/Ghrl/Grin2a/Homer3/Igsf9b/Nptxr/Pawr/Shank2/Slc9a1/Tenm4
GO:0002709	regulation of T cell mediated immunity	0.271453	4	Malt1/Nectin2/Tap2/Traf2
GO:0007528	neuromuscular junction development	0.271453	4	Cacnb2/Cacng2/Fzd9/Shank2
GO:0048260	positive regulation of receptor-mediated endocytosis	0.271453	4	Dnm2/Egf/Hip1/Hip1r
GO:0060986	endocrine hormone secretion	0.271453	4	Fgfr4/Ghrl/Ptpn11/Tbx3
GO:0008015	blood circulation	0.274285	24	Abr/Adcy6/Akt1/Atp1a3/Cacna1c/Cacna1g/Cacnb2/Casr/Cbs/Drd5/Ghrl/Hrh1/Kcnma1/Kcnn2/Manf/Map2k6/Ptk2/Ptprm/Rap1gds1/Rps6ka2/Slc4a5/Slc9a1/Srebf1/Trpv4
GO:0033500	carbohydrate homeostasis	0.274642	14	Akt1/Cacna1c/Fgfr4/Ghrl/Nadk/Ncor2/Pim3/Ptpn11/Pygl/Sox4/Sstr5/Stxbp4/Trpv4/Zbtb20
GO:0007186	G protein-coupled receptor signaling pathway	0.275438	35	Acpp/Adcy6/Adgrb1/Adgrg6/Adgrl2/Camk2a/Casr/Cav2/Cdk5r1/Celsr1/Celsr3/Chrm4/Drd5/Ezr/Fzd6/Fzd9/Ghrl/Gna11/Grk3/Grm4/Homer3/Hrh1/Htt/Lgr6/Lpar2/Oxgr1/Pdyn/Pik3r6/Plcl1/Psapl1/Ramp1/Rapgef2/Rgs11/Sort1/Sstr5
GO:0015698	inorganic anion transport	0.277882	7	Casr/Fgfr4/Pcyox1/Prkg2/Slc4a11/Slc5a5/Ttyh1
GO:0018022	peptidyl-lysine methylation	0.277882	7	Ctcfl/Ctnnb1/H2afy/Kdm4b/Nelfa/Setd4/Tet2
GO:0055006	cardiac cell development	0.277882	7	Fhod3/Myo18b/Myom3/Nebl/Notch1/Pin1/Tbx3
GO:2000181	negative regulation of blood vessel morphogenesis	0.277882	7	Adgrb1/Angpt4/Ctnnb1/Dab2ip/Notch1/Ptprm/Sulf1
GO:0007266	Rho protein signal transduction	0.277884	12	Abr/Arhgef3/Arhgef4/Celsr1/Farp1/Fgd3/Lpar2/Ntn1/Obscn/Phactr4/Rtkn/Srgap1
GO:1903362	regulation of cellular protein catabolic process	0.277884	12	Akt1/Clec16a/Dab2ip/Egf/Ezr/Fam192a/Osbpl7/Ptk2/Rhbdf1/Senp1/Smarcc1/Ube2v2
GO:0042330	taxis	0.27808	28	Adam8/Apbb2/Artn/Bmp7/Casr/Cdk5r1/Celsr3/Cmtm3/Cxcl17/Dscam/Dscaml1/Efna4/Hrh1/Ispd/Matn2/Notch1/Nr4a3/Nrcam/Ntn1/Pip5k1c/Plxna4/Plxnc1/Ptprm/Scrib/Slamf8/St6gal1/Trpv4/Wnt7b
GO:0000075	cell cycle checkpoint	0.279617	8	Cdk5rap2/Eme2/Ints7/Ptpn11/Sox4/Thoc1/Wdr76/Zfp207
GO:0007286	spermatid development	0.279617	8	Abhd2/Catsperz/Cep131/Dmc1/Nectin2/Pacrg/Six5/Tssk2
GO:0009746	response to hexose	0.279915	10	Casp6/Eif2b5/Ghrl/Mafa/Nadk/Pim3/Sox4/Srebf1/Stxbp4/Zbtb20
GO:0070997	neuron death	0.279981	20	Aatk/Adam8/Casp6/Cdk5r1/Chmp4b/Ctnnb1/Epo/Fgfr3/Fzd9/Grin2b/Htt/Jun/Kcnma1/Mcl1/Nr4a3/Pawr/Pin1/Slc9a1/Tldc1/Ube2v2
GO:0001841	neural tube formation	0.280167	9	Bmp7/Celsr1/Fzd6/Lrp2/Mthfd1l/Phactr4/Scrib/Sox4/Tgif1
GO:0002429	immune response-activating cell surface receptor signaling pathway	0.280167	9	Blk/Carmil2/Cmtm3/Eif2b5/Ezr/Malt1/Nectin2/Nr4a3/Pawr
GO:0071356	cellular response to tumor necrosis factor	0.280167	9	Adamts12/Akt1/Card14/Dab2ip/Lims1/Ocstamp/Rffl/Spata2/Traf2
GO:0006873	cellular ion homeostasis	0.280221	32	Atp1a3/Atp6v0a2/Atp6v0a4/Cacna1c/Cacna1g/Casr/Cxcl17/Epo/Ftl2-ps/Fzd9/Ghrl/Grin2a/Grin2b/Hap1/Htt/Il6st/Kcnma1/Kctd17/Pawr/Ptk2/Rap1gds1/Slamf8/Slc24a2/Slc39a13/Slc4a11/Slc4a5/Slc8a2/Slc9a1/Slc9a8/Slc9a9/Tmem178/Trpv4
GO:0000097	sulfur amino acid biosynthetic process	0.281402	2	Cbs/Ggt5
GO:0000132	establishment of mitotic spindle orientation	0.281402	2	Cdk5rap2/Htt
GO:0001696	gastric acid secretion	0.281402	2	Ghrl/Hip1r
GO:0001916	positive regulation of T cell mediated cytotoxicity	0.281402	2	Nectin2/Tap2
GO:0003184	pulmonary valve morphogenesis	0.281402	2	Nfatc1/Notch1
GO:0003215	cardiac right ventricle morphogenesis	0.281402	2	Notch1/Sox4
GO:0006760	folic acid-containing compound metabolic process	0.281402	2	Mthfd1l/Sardh
GO:0006775	fat-soluble vitamin metabolic process	0.281402	2	Fgfr4/Snai1
GO:0010447	response to acidic pH	0.281402	2	Pkd2l1/Slc9a1
GO:0030539	male genitalia development	0.281402	2	Ctnnb1/Tbx3
GO:0031577	spindle checkpoint	0.281402	2	Cdk5rap2/Zfp207
GO:0033005	positive regulation of mast cell activation	0.281402	2	Nectin2/Nr4a3
GO:0033233	regulation of protein sumoylation	0.281402	2	Ctnnb1/Traf7
GO:0033273	response to vitamin	0.281402	2	Cbs/Hlcs
GO:0035510	DNA dealkylation	0.281402	2	Stpg4/Tet2
GO:0035929	steroid hormone secretion	0.281402	2	Ghrl/Ptpn11
GO:0035994	response to muscle stretch	0.281402	2	Jun/Slc9a1
GO:0036230	granulocyte activation	0.281402	2	Abr/Stx11
GO:0042094	interleukin-2 biosynthetic process	0.281402	2	Card11/Pawr
GO:0043090	amino acid import	0.281402	2	Htt/Slc6a1
GO:0043496	regulation of protein homodimerization activity	0.281402	2	Ica1/Traf2
GO:0045475	locomotor rhythm	0.281402	2	Kcnma1/Ncoa2
GO:0045606	positive regulation of epidermal cell differentiation	0.281402	2	H2afy/Notch1
GO:0050858	negative regulation of antigen receptor-mediated signaling pathway	0.281402	2	Ezr/Pawr
GO:0051969	regulation of transmission of nerve impulse	0.281402	2	Ghrl/Pawr
GO:0060088	auditory receptor cell stereocilium organization	0.281402	2	Scrib/Whrn
GO:0060333	interferon-gamma-mediated signaling pathway	0.281402	2	Irgm1/Otop1
GO:0061339	establishment or maintenance of monopolar cell polarity	0.281402	2	Carmil2/Scrib
GO:0061756	leukocyte adhesion to vascular endothelial cell	0.281402	2	Add2/Pawr
GO:0070208	protein heterotrimerization	0.281402	2	Col1a1/Gna11
GO:0070841	inclusion body assembly	0.281402	2	Hap1/Sncaip
GO:0071800	podosome assembly	0.281402	2	Asap1/Palld
GO:0072077	renal vesicle morphogenesis	0.281402	2	Ctnnb1/Kif26b
GO:0072148	epithelial cell fate commitment	0.281402	2	Fgfr3/Notch1
GO:0097320	plasma membrane tubulation	0.281402	2	Asap1/Dnm2
GO:0097352	autophagosome maturation	0.281402	2	Clec16a/Irgm1
GO:1902307	positive regulation of sodium ion transmembrane transport	0.281402	2	Dnm2/Slc9a1
GO:1902547	regulation of cellular response to vascular endothelial growth factor stimulus	0.281402	2	Adamts12/Dab2ip
GO:1904031	positive regulation of cyclin-dependent protein kinase activity	0.281402	2	Ccnd3/Mapre3
GO:1990126	retrograde transport, endosome to plasma membrane	0.281402	2	Grip1/Scrib
GO:2000136	regulation of cell proliferation involved in heart morphogenesis	0.281402	2	Ctnnb1/Notch1
GO:0002090	regulation of receptor internalization	0.281415	5	Egf/Hap1/Nsf/Pip5k1c/Scrib
GO:0048332	mesoderm morphogenesis	0.281415	5	Bmp7/Htt/Nr4a3/Snai1/Tbx3
GO:0048477	oogenesis	0.281415	5	Amh/Ctnnb1/Dmc1/Grb14/Rps6ka2
GO:1903363	negative regulation of cellular protein catabolic process	0.281415	5	Clec16a/Dab2ip/Fam192a/Senp1/Smarcc1
GO:0035418	protein localization to synapse	0.286547	6	Cacng2/Camk2a/Grin2a/Grip1/Nptxr/Scrib
GO:0045621	positive regulation of lymphocyte differentiation	0.286547	6	Adam8/Carmil2/Malt1/Pik3r6/Zbtb16/Zmiz1
GO:0032330	regulation of chondrocyte differentiation	0.287356	4	Adamts12/Ctnnb1/Rflna/Zbtb16
GO:0043392	negative regulation of DNA binding	0.287356	4	Ercc4/Hspa4/Id4/Jun
GO:0046128	purine ribonucleoside metabolic process	0.287356	4	Acpp/Gamt/Icmt/Nme7
GO:0046902	regulation of mitochondrial membrane permeability	0.287356	4	Camk2a/Hip1r/Htt/Slc9a1
GO:0086001	cardiac muscle cell action potential	0.287356	4	Cacna1c/Cacna1g/Cacnb2/Kcnn2
GO:0097194	execution phase of apoptosis	0.287356	4	Akt1/Casp6/Rffl/Xkr8
GO:2001021	negative regulation of response to DNA damage stimulus	0.287356	4	Ercc4/Rmi2/Snai1/Thoc1
GO:0007179	transforming growth factor beta receptor signaling pathway	0.287627	11	Adam9/Cav2/Chst11/Cldn5/Dnm2/Fam89b/Jun/Ldlrad4/Map3k1/Pin1/Ptk2
GO:0034284	response to monosaccharide	0.288935	10	Casp6/Eif2b5/Ghrl/Mafa/Nadk/Pim3/Sox4/Srebf1/Stxbp4/Zbtb20
GO:0005976	polysaccharide metabolic process	0.289027	7	Akt1/Egf/Epm2a/Gfpt1/Il6st/Phlda2/Pygl
GO:0045055	regulated exocytosis	0.289482	14	Abr/Cacna1c/Cacna1g/Camk2a/Cbarp/Grm4/Mical1/Notch1/Nr4a3/Ppfia2/Scrib/Stx11/Syt13/Syt6
GO:0002065	columnar/cuboidal epithelial cell differentiation	0.289766	9	Cux1/Kcnma1/Notch1/Rxra/Sav1/Scrib/Sox4/Ush1c/Whrn
GO:0050792	regulation of viral process	0.289766	9	Cav2/Chmp4b/Hpn/Jun/Mvb12b/Nectin2/Notch1/Nr5a2/Trim8
GO:0002244	hematopoietic progenitor cell differentiation	0.28991	8	Cebpd/Dhtkd1/Dock1/Fnip1/Notch1/Sox4/Srsf4/Tet2
GO:0050851	antigen receptor-mediated signaling pathway	0.28991	8	Blk/Carmil2/Cmtm3/Eif2b5/Ezr/Malt1/Nectin2/Pawr
GO:0000186	activation of MAPKK activity	0.289994	3	Adam9/Egf/Map3k4
GO:0001702	gastrulation with mouth forming second	0.289994	3	Celsr1/Ctnnb1/Tenm4
GO:0001960	negative regulation of cytokine-mediated signaling pathway	0.289994	3	Il6st/Otop1/Rffl
GO:0006911	phagocytosis, engulfment	0.289994	3	Adgrb1/Becn1/Xkr8
GO:0009988	cell-cell recognition	0.289994	3	Aldoa/Dock8/Spesp1
GO:0010559	regulation of glycoprotein biosynthetic process	0.289994	3	Ctnnb1/Pawr/Ramp1
GO:0031128	developmental induction	0.289994	3	Ctnnb1/Fgfr4/Six3
GO:0034105	positive regulation of tissue remodeling	0.289994	3	Adam8/Erg/Ppargc1b
GO:0035850	epithelial cell differentiation involved in kidney development	0.289994	3	Ctnnb1/Mtss1/Notch1
GO:0048048	embryonic eye morphogenesis	0.289994	3	Bmp7/Phactr4/Six3
GO:0048169	regulation of long-term neuronal synaptic plasticity	0.289994	3	Drd5/Grin2a/Grin2b
GO:1900026	positive regulation of substrate adhesion-dependent cell spreading	0.289994	3	Dnm2/Dock1/Lims1
GO:1905953	negative regulation of lipid localization	0.289994	3	Akt1/Egf/Ptpn11
GO:0048511	rhythmic process	0.291366	16	Amh/Cdk5r1/Fbxl21/Gfpt1/Ghrl/Grin2a/Grin2b/Hrh1/Id4/Kcnma1/Ncoa2/Prkg2/Rai1/Relb/Six3/Srebf1
GO:0051099	positive regulation of binding	0.294149	12	Add2/Amfr/Ctnnb1/Egf/Hip1r/Hspa4/Mapre3/Nvl/Pin1/Plcl1/Rapgef2/Traf2
GO:2000116	regulation of cysteine-type endopeptidase activity	0.294149	12	Akt1/Fnip1/Grin2b/Hip1/Hip1r/Htt/Ints1/Mical1/Mtch1/Pawr/Rffl/Senp1
GO:0006835	dicarboxylic acid transport	0.29522	5	Grin2b/Htt/Lrp2/Slc13a3/Slc25a22
GO:0070373	negative regulation of ERK1 and ERK2 cascade	0.29522	5	Camk2n1/Dab2ip/Ezr/Pin1/Ptprr
GO:0097120	receptor localization to synapse	0.29522	5	Cacng2/Camk2a/Grip1/Nptxr/Scrib
GO:1905475	regulation of protein localization to membrane	0.296226	11	Akt1/Cacng2/Camk2a/Cdk5r1/Dpp6/Ezr/Fzd9/Mtcl1/Ppp2r5a/Stac/Vil1
GO:0006605	protein targeting	0.296994	14	Cacng2/Cdk5r1/Chmp4b/Hap1/Hspa4/Mtcl1/Pik3r4/Rab3ip/Srebf1/Srp14/Stxbp4/Zdhhc12/Zdhhc22/Zdhhc3
GO:0001838	embryonic epithelial tube formation	0.298033	10	Bmp7/Celsr1/Ctnnb1/Fzd6/Lrp2/Mthfd1l/Phactr4/Scrib/Sox4/Tgif1
GO:0050870	positive regulation of T cell activation	0.298033	10	Adam8/Card11/Carmil2/Dock8/Epo/Il6st/Malt1/Pik3r6/Zbtb16/Zmiz1
GO:0042176	regulation of protein catabolic process	0.298725	18	Adam8/Adam9/Adgrb1/Akt1/Clec16a/Dab2ip/Egf/Ezr/Fam192a/Grin2a/Nsf/Osbpl7/Pin1/Ptk2/Rhbdf1/Senp1/Smarcc1/Ube2v2
GO:1901214	regulation of neuron death	0.298725	18	Adam8/Casp6/Cdk5r1/Chmp4b/Ctnnb1/Epo/Fgfr3/Fzd9/Grin2b/Htt/Jun/Kcnma1/Mcl1/Nr4a3/Pawr/Pin1/Tldc1/Ube2v2
GO:0021761	limbic system development	0.298889	6	Cdk5r1/Cntnap2/Hap1/Id4/Nr4a3/Tbx3
GO:0038061	NIK/NF-kappaB signaling	0.298889	6	Akt1/Lims1/Malt1/Relb/Tlr9/Traf2
GO:0045685	regulation of glial cell differentiation	0.298889	6	Ctnnb1/Fgfr3/Id4/Il6st/Notch1/Tenm4
GO:0110110	positive regulation of animal organ morphogenesis	0.298889	6	Bmp7/Casp6/Ctnnb1/Fgfr4/Hpn/Notch1
GO:1903052	positive regulation of proteolysis involved in cellular protein catabolic process	0.298889	6	Akt1/Dab2ip/Egf/Osbpl7/Ptk2/Ube2v2
GO:0000070	mitotic sister chromatid segregation	0.300274	7	Becn1/Cdk5rap2/Chmp4b/H2afy/Msto1/Nek6/Zfp207
GO:0007586	digestion	0.300274	7	Ezr/Ghrl/Hip1r/Kcnma1/Pawr/Tlr9/Vil1
GO:2000278	regulation of DNA biosynthetic process	0.300274	7	Chtf18/Ctnnb1/Egf/Fgfr4/Map3k4/Nek7/Nvl
GO:0034332	adherens junction organization	0.300295	8	Actn1/Bcas3/Ctnnb1/Kifc3/Lims1/Mtss1/Ptk2/Rassf8
GO:0099175	regulation of postsynapse organization	0.300295	8	Cdk5r1/Chmp4b/Fzd9/Ghrl/Grin2b/Lrrc4b/Nptxr/Nrcam
GO:0034504	protein localization to nucleus	0.30146	15	Agap3/Akt1/Bmp7/Cav2/Ciz1/Col1a1/Dclk1/Htt/Ing1/Ipo4/Nvl/Pin1/Six3/Trim8/Zbtb16
GO:0043010	camera-type eye development	0.301839	19	Bmp7/Cacna1c/Ctnnb1/Dscam/Fgfr3/Jun/Man2a1/Map3k1/Mertk/Nphp4/Phactr4/Ptprm/Rxra/Scrib/Sdk1/Six3/Six5/Slc4a5/Tgif1
GO:0030003	cellular cation homeostasis	0.302987	31	Atp1a3/Atp6v0a2/Atp6v0a4/Cacna1c/Cacna1g/Casr/Cxcl17/Epo/Ftl2-ps/Fzd9/Ghrl/Grin2a/Grin2b/Hap1/Htt/Il6st/Kcnma1/Kctd17/Pawr/Rap1gds1/Slamf8/Slc24a2/Slc39a13/Slc4a11/Slc4a5/Slc8a2/Slc9a1/Slc9a8/Slc9a9/Tmem178/Trpv4
GO:0007588	excretion	0.303386	4	Anpep/Atp6v0a4/Cacna1c/Kcnma1
GO:0030834	regulation of actin filament depolymerization	0.303386	4	Add2/Capg/Carmil2/Vil1
GO:0031102	neuron projection regeneration	0.303386	4	Jun/Matn2/Omg/Xylt1
GO:0033627	cell adhesion mediated by integrin	0.303386	4	Adam9/Itga11/Ptk2/Ptpn11
GO:0048016	inositol phosphate-mediated signaling	0.303386	4	Camta1/Homer3/Nfatc1/Slc9a1
GO:1901607	alpha-amino acid biosynthetic process	0.303386	4	Cbs/Gamt/Ggt5/Sephs1
GO:1904356	regulation of telomere maintenance via telomere lengthening	0.303386	4	Ctnnb1/Ercc4/Map3k4/Nek7
GO:0072175	epithelial tube formation	0.307205	10	Bmp7/Celsr1/Ctnnb1/Fzd6/Lrp2/Mthfd1l/Phactr4/Scrib/Sox4/Tgif1
GO:0120032	regulation of plasma membrane bounded cell projection assembly	0.307205	10	Bcas3/Carmil2/Dnm2/Hap1/Htt/Kctd17/Podxl/Rab3ip/Rap1gap/Tbc1d30
GO:0048193	Golgi vesicle transport	0.307643	13	Arfgap3/Atp9a/Bicd2/Creb3l2/Cux1/Dnm2/Htt/Myo18a/Nbas/Nsf/Snx8/Sort1/Tbc1d14
GO:0001759	organ induction	0.307923	2	Ctnnb1/Fgfr4
GO:0002029	desensitization of G protein-coupled receptor signaling pathway	0.307923	2	Dnm2/Grk3
GO:0002093	auditory receptor cell morphogenesis	0.307923	2	Scrib/Whrn
GO:0002335	mature B cell differentiation	0.307923	2	Malt1/Nfatc1
GO:0002717	positive regulation of natural killer cell mediated immunity	0.307923	2	Crtam/Nectin2
GO:0003177	pulmonary valve development	0.307923	2	Nfatc1/Notch1
GO:0003283	atrial septum development	0.307923	2	Sox4/Zfpm1
GO:0006349	regulation of gene expression by genetic imprinting	0.307923	2	Ctcfl/Dnmt3a
GO:0006730	one-carbon metabolic process	0.307923	2	Mthfd1l/Sardh
GO:0007263	nitric oxide mediated signal transduction	0.307923	2	Cbs/Mafa
GO:0008053	mitochondrial fusion	0.307923	2	Afg3l1/Usp30
GO:0010640	regulation of platelet-derived growth factor receptor signaling pathway	0.307923	2	Hip1/Hip1r
GO:0010894	negative regulation of steroid biosynthetic process	0.307923	2	Hrh1/Snai1
GO:0015012	heparan sulfate proteoglycan biosynthetic process	0.307923	2	Ctnnb1/Xylt1
GO:0022401	negative adaptation of signaling pathway	0.307923	2	Dnm2/Grk3
GO:0022617	extracellular matrix disassembly	0.307923	2	Carmil2/Fgfr4
GO:0023058	adaptation of signaling pathway	0.307923	2	Dnm2/Grk3
GO:0031290	retinal ganglion cell axon guidance	0.307923	2	Nrcam/Ptprm
GO:0031297	replication fork processing	0.307923	2	Eme2/Thoc1
GO:0040001	establishment of mitotic spindle localization	0.307923	2	Cdk5rap2/Htt
GO:0045841	negative regulation of mitotic metaphase/anaphase transition	0.307923	2	Cdk5rap2/Zfp207
GO:0045939	negative regulation of steroid metabolic process	0.307923	2	Hrh1/Snai1
GO:0045954	positive regulation of natural killer cell mediated cytotoxicity	0.307923	2	Crtam/Nectin2
GO:0048670	regulation of collateral sprouting	0.307923	2	Crabp2/Omg
GO:0050434	positive regulation of viral transcription	0.307923	2	Hpn/Jun
GO:0060216	definitive hemopoiesis	0.307923	2	Senp1/Zfpm1
GO:0060947	cardiac vascular smooth muscle cell differentiation	0.307923	2	Ctnnb1/Notch1
GO:0061323	cell proliferation involved in heart morphogenesis	0.307923	2	Ctnnb1/Notch1
GO:0061900	glial cell activation	0.307923	2	Jun/Tlr9
GO:0070168	negative regulation of biomineral tissue development	0.307923	2	Notch1/Rflna
GO:0070230	positive regulation of lymphocyte apoptotic process	0.307923	2	Adam8/Fnip1
GO:0072087	renal vesicle development	0.307923	2	Ctnnb1/Kif26b
GO:0080154	regulation of fertilization	0.307923	2	Plb1/Spink13
GO:0099150	regulation of postsynaptic specialization assembly	0.307923	2	Lrrc4b/Nptxr
GO:0150052	regulation of postsynapse assembly	0.307923	2	Lrrc4b/Nptxr
GO:2000114	regulation of establishment of cell polarity	0.307923	2	Bcas3/Dock8
GO:0001738	morphogenesis of a polarized epithelium	0.309135	5	Ankrd6/Celsr1/Celsr3/Fzd6/Wnt7b
GO:0022406	membrane docking	0.309135	5	Camk2a/Cav2/Nsf/Stx11/Stx12
GO:0050885	neuromuscular process controlling balance	0.309135	5	Abr/Camta1/Kcnma1/Nr4a3/Ush1c
GO:0051965	positive regulation of synapse assembly	0.309135	5	Adgrb1/Adgrl2/Ghrl/Lrrc4b/Ube2v2
GO:0002768	immune response-regulating cell surface receptor signaling pathway	0.309212	9	Blk/Carmil2/Cmtm3/Eif2b5/Ezr/Malt1/Nectin2/Nr4a3/Pawr
GO:0002720	positive regulation of cytokine production involved in immune response	0.30954	3	Malt1/Nr4a3/Traf2
GO:0030501	positive regulation of bone mineralization	0.30954	3	Bmp7/Fgfr3/Fzd9
GO:0032228	regulation of synaptic transmission, GABAergic	0.30954	3	Hap1/Plcl1/Slc6a1
GO:0032481	positive regulation of type I interferon production	0.30954	3	Ptpn11/Tlr9/Zbtb20
GO:0035909	aorta morphogenesis	0.30954	3	Mylk/Notch1/Sox4
GO:0045010	actin nucleation	0.30954	3	Hip1r/Vil1/Wipf1
GO:0045601	regulation of endothelial cell differentiation	0.30954	3	Cldn5/Ctnnb1/Notch1
GO:0046782	regulation of viral transcription	0.30954	3	Hpn/Jun/Trim8
GO:0060325	face morphogenesis	0.30954	3	Col1a1/Crispld2/Ptpn11
GO:0070884	regulation of calcineurin-NFAT signaling cascade	0.30954	3	Camta1/Homer3/Slc9a1
GO:0097009	energy homeostasis	0.30954	3	Ghrl/Nr4a3/Trpv4
GO:0106056	regulation of calcineurin-mediated signaling	0.30954	3	Camta1/Homer3/Slc9a1
GO:1903018	regulation of glycoprotein metabolic process	0.30954	3	Ctnnb1/Pawr/Ramp1
GO:2000826	regulation of heart morphogenesis	0.30954	3	Bmp7/Ctnnb1/Notch1
GO:0030324	lung development	0.310677	12	Celsr1/Ctnnb1/Cux1/Fgfr3/Fgfr4/Heg1/Man2a1/Ncor2/Notch1/Rcn3/Sav1/Wnt7b
GO:0034976	response to endoplasmic reticulum stress	0.310677	12	Amfr/Creb3l2/Dab2ip/Dnajb12/Eif2b5/Erp27/Fbxo6/Jkamp/Jun/Manf/Rcn3/Tmem117
GO:0014020	primary neural tube formation	0.310763	8	Bmp7/Celsr1/Fzd6/Lrp2/Mthfd1l/Phactr4/Scrib/Tgif1
GO:0048675	axon extension	0.310763	8	Aatk/Cdk5r1/Dclk1/Dnm2/Dscam/Limk1/Ntn1/Plxna4
GO:0051961	negative regulation of nervous system development	0.310914	20	Aatk/Adcy6/Asap1/Bmp7/Cdk5r1/Cdk5rap2/Ctnnb1/Disp3/Fgfr3/Id4/Notch1/Ntm/Ntn1/Ptk2/Rap1gap/Rapgef2/Six3/Trpv4/Wnt7b/Xylt1
GO:0007338	single fertilization	0.31133	6	Abhd2/Aldoa/Plb1/Spesp1/Spink13/Syt6
GO:0060759	regulation of response to cytokine stimulus	0.31133	6	Il6st/Irgm1/Otop1/Rffl/Spata2/Traf2
GO:1901888	regulation of cell junction assembly	0.31133	6	Bcas3/Lims1/Nphp4/Ptk2/Rapgef2/Snai1
GO:0007034	vacuolar transport	0.311611	7	Becn1/Cacng2/Chmp4b/Clec16a/Pik3r4/Sort1/Tmem50b
GO:0009855	determination of bilateral symmetry	0.311611	7	1700007K13Rik/Ctnnb1/Map3k4/Nme7/Notch1/Tbx3/Tgif1
GO:0030516	regulation of axon extension	0.311611	7	Aatk/Cdk5r1/Dnm2/Dscam/Limk1/Ntn1/Plxna4
GO:0048145	regulation of fibroblast proliferation	0.311611	7	B4galt7/Dab2ip/Egf/Jun/Pawr/Tgif1/Zmiz1
GO:0051223	regulation of protein transport	0.314049	32	Adam9/Bcas3/Blk/Carmil2/Casr/Cdk5r1/Cep131/Crtam/Egf/Ezr/Ghrl/Hadh/Ica1/Lrp2/Midn/Mtcl1/Myo18a/Nadk/Oit1/Pim3/Ptpn11/Rhbdf1/Sox4/Srebf1/Sstr5/Stxbp4/Tlr5/Tlr9/Traf2/Trpv4/Wipf1/Xpo4
GO:0060491	regulation of cell projection assembly	0.316444	10	Bcas3/Carmil2/Dnm2/Hap1/Htt/Kctd17/Podxl/Rab3ip/Rap1gap/Tbc1d30
GO:1904064	positive regulation of cation transmembrane transport	0.319044	9	Cacnb2/Cacng2/Cracr2a/Dnm2/Dpp6/Hap1/Htt/Slc9a1/Stac
GO:0045428	regulation of nitric oxide biosynthetic process	0.319509	4	Akt1/Dnm2/Hrh1/Tlr5
GO:0071156	regulation of cell cycle arrest	0.319509	4	Cdk5r1/Dab2ip/Fzd9/Sox4
GO:0010631	epithelial cell migration	0.319605	16	Adam8/Adam9/Adgrb1/Akt1/Angpt4/Bcas3/Capn7/Dab2ip/Dock1/Jun/Notch1/Ptk2/Ptpn11/Ptprm/Ptprr/Vil1
GO:0045444	fat cell differentiation	0.319857	14	Akt1/Cebpd/Id4/Mecom/Ncor2/Nr4a3/Osbpl11/Sav1/Sort1/Srebf1/Trpv4/Wnt5b/Zbtb16/Zfpm1
GO:0007043	cell-cell junction assembly	0.323026	7	Arvcf/Cldn5/Gjb2/Heg1/Nphp4/Snai1/Trpv4
GO:0007569	cell aging	0.323026	7	Htt/Icmt/Mirlet7i/Pawr/Tbx3/Wnt16/Zmiz1
GO:0009799	specification of symmetry	0.323026	7	1700007K13Rik/Ctnnb1/Map3k4/Nme7/Notch1/Tbx3/Tgif1
GO:0060419	heart growth	0.323026	7	Ctnnb1/Heg1/Notch1/Pin1/Rxra/Sav1/Tenm4
GO:0060840	artery development	0.323026	7	Ctnnb1/Dnm2/Lrp2/Mylk/Notch1/Sox4/Zmiz1
GO:1903076	regulation of protein localization to plasma membrane	0.323026	7	Akt1/Camk2a/Dpp6/Ezr/Ppp2r5a/Stac/Vil1
GO:1904892	regulation of STAT cascade	0.323026	7	Cdk5r1/Egf/Epo/Fgfr3/Il6st/Notch1/Ptprt
GO:0000045	autophagosome assembly	0.323139	5	Becn1/Chmp4b/Irgm1/Stx12/Tbc1d14
GO:0032024	positive regulation of insulin secretion	0.323139	5	Blk/Casr/Ghrl/Nadk/Sox4
GO:0098659	inorganic cation import across plasma membrane	0.323139	5	Atp1a3/Pawr/Slc8a2/Slc9a1/Slc9a9
GO:0099587	inorganic ion import across plasma membrane	0.323139	5	Atp1a3/Pawr/Slc8a2/Slc9a1/Slc9a9
GO:0015672	monovalent inorganic cation transport	0.323317	23	Akt1/Atp1a3/Atp6v0a2/Atp6v0a4/Atp6v0b/Dnm2/Dpp6/Fxyd2/Hpn/Kcnma1/Kcnn2/Kcnq4/Nsf/Otop1/Pkd2l1/Slc13a3/Slc4a11/Slc5a11/Slc5a5/Slc8a2/Slc9a1/Slc9a8/Slc9a9
GO:0009416	response to light stimulus	0.323548	15	1700007K13Rik/Agap3/Akt1/Atp1a3/Cacna1c/Drd5/Ercc4/Fbxl21/Ghrl/Grin2a/Hrh1/Htt/Map3k4/Nsmce3/Rcvrn
GO:0009896	positive regulation of catabolic process	0.323567	20	Abcd2/Adam8/Adam9/Akt1/Becn1/Clec16a/Dab2ip/Egf/Epm2a/Ezr/Htt/Irgm1/Nsf/Osbpl7/Ptk2/Tlr9/Tnrc6b/Trim8/Ube2v2/Zbtb20
GO:0006090	pyruvate metabolic process	0.323855	6	Aldoa/Dhtkd1/Htt/Me1/Nr4a3/Zbtb20
GO:0007006	mitochondrial membrane organization	0.323855	6	Afg3l1/Camk2a/Hip1r/Hspa4/Htt/Slc9a1
GO:0034968	histone lysine methylation	0.323855	6	Ctcfl/Ctnnb1/H2afy/Kdm4b/Nelfa/Tet2
GO:0045727	positive regulation of translation	0.323855	6	Eif2b5/Larp4/Mrps27/Rxra/Samd4/Sox4
GO:0010977	negative regulation of neuron projection development	0.325743	10	Aatk/Adcy6/Asap1/Cdk5r1/Ntm/Ntn1/Ptk2/Rapgef2/Trpv4/Xylt1
GO:0060485	mesenchyme development	0.326778	16	Bmp7/Col1a1/Ctnnb1/Dab2ip/Erg/Hpn/Htt/Ldlrad4/Nfatc1/Notch1/Pawr/Phactr4/Rxra/Snai1/Wnt16/Wnt7b
GO:0090132	epithelium migration	0.326778	16	Adam8/Adam9/Adgrb1/Akt1/Angpt4/Bcas3/Capn7/Dab2ip/Dock1/Jun/Notch1/Ptk2/Ptpn11/Ptprm/Ptprr/Vil1
GO:0030323	respiratory tube development	0.327433	12	Celsr1/Ctnnb1/Cux1/Fgfr3/Fgfr4/Heg1/Man2a1/Ncor2/Notch1/Rcn3/Sav1/Wnt7b
GO:0050804	modulation of chemical synaptic transmission	0.328064	31	Abr/Adgrb1/Cacng2/Camk2a/Celsr1/Drd5/Ghrl/Grik4/Grin2a/Grin2b/Grm4/Hap1/Homer3/Hrh1/Htt/Ica1/Igsf9b/Kcnn2/Kcnq4/Mirlet7i/Nptxr/Plcl1/Ppfia2/Ptk2/Rapgef2/Shank2/Slc24a2/Slc6a1/Slc8a2/Sncaip/Sorcs3
GO:0007091	metaphase/anaphase transition of mitotic cell cycle	0.329126	3	Cdk5rap2/Nek6/Zfp207
GO:0032206	positive regulation of telomere maintenance	0.329126	3	Ctnnb1/Map3k4/Nek7
GO:0033619	membrane protein proteolysis	0.329126	3	Adam8/Adam9/Sppl2b
GO:0040036	regulation of fibroblast growth factor receptor signaling pathway	0.329126	3	Ctnnb1/Fgfrl1/Sulf1
GO:0042274	ribosomal small subunit biogenesis	0.329126	3	Rps15/Rps21/Srfbp1
GO:0045494	photoreceptor cell maintenance	0.329126	3	Nphp4/Ush1c/Ush2a
GO:0060122	inner ear receptor cell stereocilium organization	0.329126	3	Scrib/Ush1c/Whrn
GO:0060603	mammary gland duct morphogenesis	0.329126	3	Ntn1/Scrib/Tbx3
GO:0099068	postsynapse assembly	0.329126	3	Lrrc4b/Nptxr/Shank2
GO:2000401	regulation of lymphocyte migration	0.329126	3	Adam8/Akt1/Dock8
GO:0032984	protein-containing complex disassembly	0.331265	11	Add2/Capg/Carmil2/Clec16a/Irgm1/Mical1/Nckap5/Nsf/Smarcc1/Trpv4/Vil1
GO:0001654	eye development	0.331881	21	Bmp7/Cacna1c/Casp6/Ctnnb1/Dscam/Fgfr3/Frem2/Jun/Man2a1/Map3k1/Mertk/Nphp4/Phactr4/Ptprm/Rxra/Scrib/Sdk1/Six3/Six5/Slc4a5/Tgif1
GO:0030900	forebrain development	0.331881	21	Cdk5r1/Cntnap2/Ctnnb1/Dab2ip/Dclk1/Dct/Fgfr3/Hap1/Htt/Id4/Lrp2/Mecom/Ncor2/Notch1/Nr4a3/Plxna4/Rapgef2/Six3/Tbx3/Trappc9/Wnt7b
GO:0150063	visual system development	0.331881	21	Bmp7/Cacna1c/Casp6/Ctnnb1/Dscam/Fgfr3/Frem2/Jun/Man2a1/Map3k1/Mertk/Nphp4/Phactr4/Ptprm/Rxra/Scrib/Sdk1/Six3/Six5/Slc4a5/Tgif1
GO:0099177	regulation of trans-synaptic signaling	0.333154	31	Abr/Adgrb1/Cacng2/Camk2a/Celsr1/Drd5/Ghrl/Grik4/Grin2a/Grin2b/Grm4/Hap1/Homer3/Hrh1/Htt/Ica1/Igsf9b/Kcnn2/Kcnq4/Mirlet7i/Nptxr/Plcl1/Ppfia2/Ptk2/Rapgef2/Shank2/Slc24a2/Slc6a1/Slc8a2/Sncaip/Sorcs3
GO:0001780	neutrophil homeostasis	0.334242	2	Mecom/Mertk
GO:0002347	response to tumor cell	0.334242	2	Crtam/Nectin2
GO:0003433	chondrocyte development involved in endochondral bone morphogenesis	0.334242	2	Matn2/Poc1a
GO:0006829	zinc ion transport	0.334242	2	Slc39a13/Slc39a3
GO:0008299	isoprenoid biosynthetic process	0.334242	2	Fdft1/Ispd
GO:0010574	regulation of vascular endothelial growth factor production	0.334242	2	Cxcl17/Sulf1
GO:0010842	retina layer formation	0.334242	2	Ptprm/Sdk1
GO:0016048	detection of temperature stimulus	0.334242	2	Lxn/Pawr
GO:0034123	positive regulation of toll-like receptor signaling pathway	0.334242	2	Tlr5/Tlr9
GO:0036010	protein localization to endosome	0.334242	2	Ezr/Scrib
GO:0040037	negative regulation of fibroblast growth factor receptor signaling pathway	0.334242	2	Fgfrl1/Sulf1
GO:0043921	modulation by host of viral transcription	0.334242	2	Hpn/Jun
GO:0045662	negative regulation of myoblast differentiation	0.334242	2	Notch1/Tbx3
GO:0048268	clathrin coat assembly	0.334242	2	Hip1/Hip1r
GO:0051767	nitric-oxide synthase biosynthetic process	0.334242	2	Map2k6/Tlr9
GO:0051769	regulation of nitric-oxide synthase biosynthetic process	0.334242	2	Map2k6/Tlr9
GO:0052312	modulation of transcription in other organism involved in symbiotic interaction	0.334242	2	Hpn/Jun
GO:0052472	modulation by host of symbiont transcription	0.334242	2	Hpn/Jun
GO:0071276	cellular response to cadmium ion	0.334242	2	Akt1/Jun
GO:0071985	multivesicular body sorting pathway	0.334242	2	Sort1/Tmem50b
GO:0072012	glomerulus vasculature development	0.334242	2	Bmp7/Notch1
GO:0150076	neuroinflammatory response	0.334242	2	Jun/Tlr9
GO:1901797	negative regulation of signal transduction by p53 class mediator	0.334242	2	Rffl/Snai1
GO:1902100	negative regulation of metaphase/anaphase transition of cell cycle	0.334242	2	Cdk5rap2/Zfp207
GO:1902624	positive regulation of neutrophil migration	0.334242	2	Adam8/Pawr
GO:1903010	regulation of bone development	0.334242	2	Ghrl/Rflna
GO:1903319	positive regulation of protein maturation	0.334242	2	Hpn/Sox4
GO:2000816	negative regulation of mitotic sister chromatid separation	0.334242	2	Cdk5rap2/Zfp207
GO:0010508	positive regulation of autophagy	0.334508	7	Becn1/Clec16a/Epm2a/Htt/Irgm1/Tlr9/Trim8
GO:0030048	actin filament-based movement	0.334508	7	Apbb2/Cacna1c/Cacna1g/Cacnb2/Kcnn2/Vil1/Wipf1
GO:0048144	fibroblast proliferation	0.334508	7	B4galt7/Dab2ip/Egf/Jun/Pawr/Tgif1/Zmiz1
GO:0045732	positive regulation of protein catabolic process	0.335098	10	Adam8/Adam9/Akt1/Dab2ip/Egf/Ezr/Nsf/Osbpl7/Ptk2/Ube2v2
GO:0001910	regulation of leukocyte mediated cytotoxicity	0.335695	4	Crtam/Nectin2/Pik3r6/Tap2
GO:0002718	regulation of cytokine production involved in immune response	0.335695	4	Malt1/Nr4a3/Tlr9/Traf2
GO:0009119	ribonucleoside metabolic process	0.335695	4	Acpp/Gamt/Icmt/Nme7
GO:0044264	cellular polysaccharide metabolic process	0.336447	6	Akt1/Epm2a/Gfpt1/Il6st/Phlda2/Pygl
GO:0097530	granulocyte migration	0.336447	6	Adam8/Cxcl17/Hrh1/Pawr/Slamf8/Trpv4
GO:0120034	positive regulation of plasma membrane bounded cell projection assembly	0.336447	6	Bcas3/Carmil2/Dnm2/Hap1/Htt/Kctd17
GO:0001909	leukocyte mediated cytotoxicity	0.337211	5	Crtam/Nectin2/Pik3r6/Stx11/Tap2
GO:0002456	T cell mediated immunity	0.337211	5	Malt1/Nectin2/Stx11/Tap2/Traf2
GO:0048880	sensory system development	0.338139	21	Bmp7/Cacna1c/Casp6/Ctnnb1/Dscam/Fgfr3/Frem2/Jun/Man2a1/Map3k1/Mertk/Nphp4/Phactr4/Ptprm/Rxra/Scrib/Sdk1/Six3/Six5/Slc4a5/Tgif1
GO:0007159	leukocyte cell-cell adhesion	0.338494	15	Adam8/Add2/Akt1/Bmp7/Card11/Carmil2/Dock8/Epo/Il6st/Malt1/Nr4a3/Pawr/Pik3r6/Zbtb16/Zmiz1
GO:0032874	positive regulation of stress-activated MAPK cascade	0.33889	9	Dab2ip/Map3k1/Map3k4/Tlr9/Tnfrsf19/Traf2/Trpv4/Wnt16/Wnt7b
GO:0070304	positive regulation of stress-activated protein kinase signaling cascade	0.33889	9	Dab2ip/Map3k1/Map3k4/Tlr9/Tnfrsf19/Traf2/Trpv4/Wnt16/Wnt7b
GO:0090130	tissue migration	0.341239	16	Adam8/Adam9/Adgrb1/Akt1/Angpt4/Bcas3/Capn7/Dab2ip/Dock1/Jun/Notch1/Ptk2/Ptpn11/Ptprm/Ptprr/Vil1
GO:0043086	negative regulation of catalytic activity	0.341909	29	Akt1/Bcas3/Bmp7/Camk2n1/Dab2ip/Drd5/Dusp16/Elfn1/Epm2a/Farp1/Fnip1/H2afy/Hpn/Htt/Ints1/Limk1/Lxn/Mical1/Midn/Notch1/Ppp1r27/Ppp2r5a/Ptprt/Rasa4/Rffl/Sort1/Spink13/Tlr9/Wfdc1
GO:0043122	regulation of I-kappaB kinase/NF-kappaB signaling	0.342577	8	Akt1/Card11/Ctnnb1/Dab2ip/Tlr9/Tnfrsf19/Traf2/Trim8
GO:0048515	spermatid differentiation	0.342577	8	Abhd2/Catsperz/Cep131/Dmc1/Nectin2/Pacrg/Six5/Tssk2
GO:1904375	regulation of protein localization to cell periphery	0.342577	8	Akt1/Cacng2/Camk2a/Dpp6/Ezr/Ppp2r5a/Stac/Vil1
GO:0044057	regulation of system process	0.343399	31	Acpp/Akt1/Anpep/Becn1/Cacna1c/Cacna1g/Cacnb2/Casr/Fgfr4/Ghrl/Grin2a/Hip1r/Homer3/Hrh1/Igsf9b/Kcnma1/Kcnn2/Mtg2/Nfatc1/Notch1/Nptxr/Nr4a3/Pawr/Pin1/Ptk2/Ptpn11/Shank2/Slc9a1/Srebf1/Srl/Tenm4
GO:0008361	regulation of cell size	0.344382	12	Aatk/Akt1/Cdk5r1/Crabp2/Dnm2/Dscam/Kcnma1/Limk1/Ntn1/Omg/Plxna4/Prkg2
GO:0055080	cation homeostasis	0.345615	35	Anpep/Atp1a3/Atp6v0a2/Atp6v0a4/Cacna1c/Cacna1g/Casr/Cxcl17/Epo/Ftl2-ps/Fzd9/Ghrl/Grin2a/Grin2b/Hap1/Htt/Il6st/Kcnma1/Kctd17/Mir122/Mtss1/Pawr/Rap1gds1/Rhd/Slamf8/Slc24a2/Slc39a13/Slc4a11/Slc4a5/Slc8a2/Slc9a1/Slc9a8/Slc9a9/Tmem178/Trpv4
GO:0045787	positive regulation of cell cycle	0.345756	18	Becn1/Ccnd3/Ccnj/Cdk5r1/Dab2ip/Egf/Fzd9/H2afy/Mapre3/Nr4a3/Poc1a/Ptpn11/Rad51b/Sox4/Sstr5/Stxbp4/Tbx3/Thoc1
GO:0031503	protein-containing complex localization	0.347945	13	Cacng2/Camk2a/Cep131/Dnm2/Ezr/Grip1/Hap1/Nme7/Nptxr/Pip5k1c/Rps15/Scrib/Thoc1
GO:0060271	cilium assembly	0.347945	13	Asap1/Celsr3/Cep131/Dnah8/Dnm2/Hap1/Htt/Kctd17/Poc1a/Rab3ip/Tbc1d30/Tekt2/Wdr34
GO:0001912	positive regulation of leukocyte mediated cytotoxicity	0.348698	3	Crtam/Nectin2/Tap2
GO:0002704	negative regulation of leukocyte mediated immunity	0.348698	3	Abr/Tap2/Thoc1
GO:0006584	catecholamine metabolic process	0.348698	3	Cyp2d22/Grin2a/Sncaip
GO:0009712	catechol-containing compound metabolic process	0.348698	3	Cyp2d22/Grin2a/Sncaip
GO:0010765	positive regulation of sodium ion transport	0.348698	3	Akt1/Dnm2/Slc9a1
GO:0010965	regulation of mitotic sister chromatid separation	0.348698	3	Cdk5rap2/Nek6/Zfp207
GO:0030857	negative regulation of epithelial cell differentiation	0.348698	3	Ctnnb1/Notch1/Tbx3
GO:0044784	metaphase/anaphase transition of cell cycle	0.348698	3	Cdk5rap2/Nek6/Zfp207
GO:0046189	phenol-containing compound biosynthetic process	0.348698	3	Cyp2d22/Dct/Rapgef2
GO:0060761	negative regulation of response to cytokine stimulus	0.348698	3	Il6st/Otop1/Rffl
GO:0090307	mitotic spindle assembly	0.348698	3	Chmp4b/Msto1/Zfp207
GO:1900744	regulation of p38MAPK cascade	0.348698	3	Dab2ip/Ezr/Map3k4
GO:1905268	negative regulation of chromatin organization	0.348698	3	Atad2b/H2afy/Kdm4b
GO:0010951	negative regulation of endopeptidase activity	0.349094	6	Akt1/Fnip1/Htt/Ints1/Mical1/Rffl
GO:0034341	response to interferon-gamma	0.349094	6	Capg/Irgm1/Myo18a/Otop1/Stx11/Stxbp4
GO:0050852	T cell receptor signaling pathway	0.349094	6	Carmil2/Eif2b5/Ezr/Malt1/Nectin2/Pawr
GO:0022411	cellular component disassembly	0.350703	17	Add2/Becn1/Capg/Carmil2/Clec16a/Fgfr4/Hpn/Htt/Irgm1/Mical1/Nckap5/Nsf/Smarcc1/Srebf1/Trpv4/Usp30/Vil1
GO:0002708	positive regulation of lymphocyte mediated immunity	0.35133	5	Crtam/Malt1/Nectin2/Tap2/Traf2
GO:0008543	fibroblast growth factor receptor signaling pathway	0.35133	5	Ctnnb1/Fgfr3/Fgfr4/Fgfrl1/Sulf1
GO:0030838	positive regulation of actin filament polymerization	0.35133	5	Carmil2/Hip1r/Map3k1/Vil1/Wipf1
GO:0036503	ERAD pathway	0.35133	5	Amfr/Dnajb12/Fbxo6/Jkamp/Rcn3
GO:0043242	negative regulation of protein complex disassembly	0.35133	5	Add2/Capg/Carmil2/Clec16a/Vil1
GO:0044272	sulfur compound biosynthetic process	0.35133	5	Cbs/Chst11/Chst5/Ggt5/Xylt1
GO:0055072	iron ion homeostasis	0.35133	5	Atp6v0a2/Ftl2-ps/Htt/Mir122/Rhd
GO:0006919	activation of cysteine-type endopeptidase activity involved in apoptotic process	0.351913	4	Hip1/Hip1r/Mtch1/Senp1
GO:0008652	cellular amino acid biosynthetic process	0.351913	4	Cbs/Gamt/Ggt5/Sephs1
GO:0030858	positive regulation of epithelial cell differentiation	0.351913	4	Cldn5/Ctnnb1/H2afy/Notch1
GO:0031397	negative regulation of protein ubiquitination	0.351913	4	Adgrb1/Akt1/Limk1/Sox4
GO:0032755	positive regulation of interleukin-6 production	0.351913	4	Ptpn11/Tlr9/Trpv4/Zbtb20
GO:0032835	glomerulus development	0.351913	4	Bmp7/Mtss1/Notch1/Sulf1
GO:0042278	purine nucleoside metabolic process	0.351913	4	Acpp/Gamt/Icmt/Nme7
GO:0048512	circadian behavior	0.351913	4	Ghrl/Kcnma1/Ncoa2/Six3
GO:0060688	regulation of morphogenesis of a branching structure	0.351913	4	Bmp7/Ctnnb1/Rxra/Sulf1
GO:1901224	positive regulation of NIK/NF-kappaB signaling	0.351913	4	Lims1/Malt1/Tlr9/Traf2
GO:1902883	negative regulation of response to oxidative stress	0.351913	4	Ctnnb1/H2afy/Nr4a3/Tldc1
GO:1903051	negative regulation of proteolysis involved in cellular protein catabolic process	0.351913	4	Clec16a/Fam192a/Senp1/Smarcc1
GO:0015893	drug transport	0.353948	10	Ghrl/Htt/Lrp2/Ptpn11/Slc13a3/Slc25a22/Slc35f3/Slc4a11/Syt13/Syt6
GO:0042254	ribosome biogenesis	0.353948	10	Ipo4/Nvl/Ppan/Rpl10l/Rpl7a/Rps15/Rps21/Rrp1/Srfbp1/Traf7
GO:0070507	regulation of microtubule cytoskeleton organization	0.353948	10	Bicd2/Bora/Cdk5r1/Cdk5rap2/Cep131/Chmp4b/Ctnnb1/Mapre3/Poc1a/Trpv4
GO:0006813	potassium ion transport	0.356128	13	Atp1a3/Dnm2/Dpp6/Fxyd2/Hpn/Kcnma1/Kcnn2/Kcnq4/Nsf/Pkd2l1/Slc9a1/Slc9a8/Slc9a9
GO:0002706	regulation of lymphocyte mediated immunity	0.357629	7	Crtam/Malt1/Nectin2/Pik3r6/Tap2/Thoc1/Traf2
GO:0006839	mitochondrial transport	0.358931	9	Camk2a/Hip1r/Hspa4/Htt/Kif1bp/Slc25a22/Slc25a37/Slc9a1/Srebf1
GO:0001914	regulation of T cell mediated cytotoxicity	0.360259	2	Nectin2/Tap2
GO:0003418	growth plate cartilage chondrocyte differentiation	0.360259	2	Matn2/Poc1a
GO:0005979	regulation of glycogen biosynthetic process	0.360259	2	Akt1/Gfpt1
GO:0006356	regulation of transcription by RNA polymerase I	0.360259	2	H2afy/Ippk
GO:0006972	hyperosmotic response	0.360259	2	Epo/Trpv4
GO:0007099	centriole replication	0.360259	2	Cdk5rap2/Deup1
GO:0008206	bile acid metabolic process	0.360259	2	Fgfr4/Nr5a2
GO:0010573	vascular endothelial growth factor production	0.360259	2	Cxcl17/Sulf1
GO:0010800	positive regulation of peptidyl-threonine phosphorylation	0.360259	2	Bmp7/Egf
GO:0010962	regulation of glucan biosynthetic process	0.360259	2	Akt1/Gfpt1
GO:0016073	snRNA metabolic process	0.360259	2	Ints1/Ints7
GO:0030490	maturation of SSU-rRNA	0.360259	2	Rps21/Srfbp1
GO:0032703	negative regulation of interleukin-2 production	0.360259	2	Ezr/Homer3
GO:0033048	negative regulation of mitotic sister chromatid segregation	0.360259	2	Cdk5rap2/Zfp207
GO:0035036	sperm-egg recognition	0.360259	2	Aldoa/Spesp1
GO:0043552	positive regulation of phosphatidylinositol 3-kinase activity	0.360259	2	Fgfr3/Pik3r4
GO:0050951	sensory perception of temperature stimulus	0.360259	2	Lxn/Pawr
GO:0051642	centrosome localization	0.360259	2	Bicd2/Ezr
GO:0060384	innervation	0.360259	2	Fgfr3/Sulf1
GO:0061437	renal system vasculature development	0.360259	2	Bmp7/Notch1
GO:0061440	kidney vasculature development	0.360259	2	Bmp7/Notch1
GO:0072273	metanephric nephron morphogenesis	0.360259	2	Ctnnb1/Kif26b
GO:0072574	hepatocyte proliferation	0.360259	2	Hpn/Lims1
GO:0072575	epithelial cell proliferation involved in liver morphogenesis	0.360259	2	Hpn/Lims1
GO:0098534	centriole assembly	0.360259	2	Cdk5rap2/Deup1
GO:1901522	positive regulation of transcription from RNA polymerase II promoter involved in cellular response to chemical stimulus	0.360259	2	Notch1/Rxra
GO:1901532	regulation of hematopoietic progenitor cell differentiation	0.360259	2	Fnip1/Notch1
GO:1905819	negative regulation of chromosome separation	0.360259	2	Cdk5rap2/Zfp207
GO:0007162	negative regulation of cell adhesion	0.361181	15	Adam8/Akt1/Bcas3/Col1a1/Dscam/Dscaml1/Jam2/Notch1/Pawr/Plxna4/Plxnc1/Podxl/Ptk2/Ptpn11/Trpv4
GO:0034764	positive regulation of transmembrane transport	0.361488	12	Akt1/Cacnb2/Cacng2/Cracr2a/Dnm2/Dpp6/Hap1/Htt/Nr4a3/Ptpn11/Slc9a1/Stac
GO:0030282	bone mineralization	0.36178	6	Bmp7/Fgfr3/Fzd9/Icmt/Mtss1/Rflna
GO:0032368	regulation of lipid transport	0.36178	6	Abca2/Akt1/Egf/Ghrl/Map2k6/Ptpn11
GO:0036473	cell death in response to oxidative stress	0.36178	6	Ctnnb1/Erp27/Mcl1/Nr4a3/Pawr/Tldc1
GO:0046849	bone remodeling	0.36178	6	Adam8/Ctnnb1/Efna4/Fgfr3/Ppargc1b/Wnt16
GO:1903409	reactive oxygen species biosynthetic process	0.36178	6	Abcd2/Adgrb1/Akt1/Dnm2/Hrh1/Tlr5
GO:0032412	regulation of ion transmembrane transporter activity	0.364344	13	Cacnb2/Cacng2/Cbarp/Cracr2a/Dnm2/Epo/Fxyd2/Hap1/Htt/Shank2/Slc9a1/Stac/Tlr9
GO:0048762	mesenchymal cell differentiation	0.364344	13	Bmp7/Col1a1/Ctnnb1/Dab2ip/Erg/Hpn/Ldlrad4/Nfatc1/Notch1/Pawr/Phactr4/Snai1/Wnt16
GO:0007052	mitotic spindle organization	0.365478	5	Bora/Chmp4b/Msto1/Poc1a/Zfp207
GO:0010923	negative regulation of phosphatase activity	0.365478	5	Elfn1/Epm2a/Farp1/Hpn/Ppp1r27
GO:0014015	positive regulation of gliogenesis	0.365478	5	Il6st/Lrp2/Notch1/Ptk2/Tenm4
GO:1903008	organelle disassembly	0.365478	5	Becn1/Clec16a/Htt/Srebf1/Usp30
GO:1905037	autophagosome organization	0.365478	5	Becn1/Chmp4b/Irgm1/Stx12/Tbc1d14
GO:0045088	regulation of innate immune response	0.367083	11	Adam8/Crtam/Dab2ip/Irgm1/Nectin2/Otop1/Pik3r6/Slamf8/Tap2/Tlr5/Tlr9
GO:0071804	cellular potassium ion transport	0.367083	11	Atp1a3/Dnm2/Dpp6/Hpn/Kcnma1/Kcnn2/Kcnq4/Pkd2l1/Slc9a1/Slc9a8/Slc9a9
GO:0071805	potassium ion transmembrane transport	0.367083	11	Atp1a3/Dnm2/Dpp6/Hpn/Kcnma1/Kcnn2/Kcnq4/Pkd2l1/Slc9a1/Slc9a8/Slc9a9
GO:0007218	neuropeptide signaling pathway	0.368134	4	Pdyn/Rapgef2/Sort1/Sstr5
GO:0007622	rhythmic behavior	0.368134	4	Ghrl/Kcnma1/Ncoa2/Six3
GO:0009880	embryonic pattern specification	0.368134	4	Bmp7/Ctnnb1/Tbx3/Zbtb16
GO:0035924	cellular response to vascular endothelial growth factor stimulus	0.368134	4	Adamts12/Akt1/Dab2ip/Notch1
GO:0060042	retina morphogenesis in camera-type eye	0.368134	4	Dscam/Man2a1/Ptprm/Sdk1
GO:0072676	lymphocyte migration	0.368134	4	Adam8/Akt1/Artn/Dock8
GO:0099601	regulation of neurotransmitter receptor activity	0.368134	4	Cacng2/Homer3/Nptxr/Shank2
GO:1903725	regulation of phospholipid metabolic process	0.368134	4	Dab2ip/Fgfr3/Pik3r4/Pik3r6
GO:1904029	regulation of cyclin-dependent protein kinase activity	0.368134	4	Camk2n1/Ccnd3/Ccnj/Mapre3
GO:0000060	protein import into nucleus, translocation	0.368208	3	Agap3/Akt1/Six3
GO:0000288	nuclear-transcribed mRNA catabolic process, deadenylation-dependent decay	0.368208	3	Pnldc1/Samd4/Tnrc6b
GO:0010828	positive regulation of glucose transmembrane transport	0.368208	3	Akt1/Nr4a3/Ptpn11
GO:0019083	viral transcription	0.368208	3	Hpn/Jun/Trim8
GO:0021795	cerebral cortex cell migration	0.368208	3	Cdk5r1/Ctnnb1/Dab2ip
GO:0032873	negative regulation of stress-activated MAPK cascade	0.368208	3	Akt1/Ezr/Mecom
GO:0032892	positive regulation of organic acid transport	0.368208	3	Grin2b/Map2k6/Slc6a1
GO:0035082	axoneme assembly	0.368208	3	Cep131/Dnah8/Tekt2
GO:0046173	polyol biosynthetic process	0.368208	3	Ippk/Pcbd2/Pts
GO:0046718	viral entry into host cell	0.368208	3	Cav2/Nectin2/Trim8
GO:0051306	mitotic sister chromatid separation	0.368208	3	Cdk5rap2/Nek6/Zfp207
GO:0051932	synaptic transmission, GABAergic	0.368208	3	Hap1/Plcl1/Slc6a1
GO:0070303	negative regulation of stress-activated protein kinase signaling cascade	0.368208	3	Akt1/Ezr/Mecom
GO:0071674	mononuclear cell migration	0.368208	3	Cxcl17/Slamf8/Trpv4
GO:0120163	negative regulation of cold-induced thermogenesis	0.368208	3	Map2k6/Notch1/Plcl1
GO:1902743	regulation of lamellipodium organization	0.368208	3	Carmil2/Dnm2/Vil1
GO:0002274	myeloid leukocyte activation	0.369006	9	Abr/Adam9/Jun/Myo18a/Nectin2/Nr4a3/Relb/Stx11/Tlr9
GO:0042180	cellular ketone metabolic process	0.369006	9	Abcd2/Akr7a5/Akt1/Aldoa/Fgfr4/Kcnma1/Ncor2/Nr4a3/Srebf1
GO:0014065	phosphatidylinositol 3-kinase signaling	0.369246	7	Akt1/Dab2ip/Pik3r6/Ptk2/Ptpn13/Rgl2/Wnt16
GO:0051261	protein depolymerization	0.369246	7	Add2/Capg/Carmil2/Mical1/Nckap5/Trpv4/Vil1
GO:0060048	cardiac muscle contraction	0.369246	7	Atp1a3/Cacna1c/Cacna1g/Cacnb2/Kcnn2/Map2k6/Slc9a1
GO:0001568	blood vessel development	0.370189	37	Adam8/Adgrb1/Akt1/Angpt4/Anpep/Antxr1/Bcas3/Becn1/Bmp7/Col18a1/Col1a1/Ctnnb1/Cxcl17/Dab2ip/Dnm2/Egf/Epo/Fgfr4/Ghrl/Heg1/Hspg2/Jun/Lrp2/Mylk/Myo18b/Notch1/Pik3r6/Ptk2/Ptprm/Ramp1/Rapgef2/Rxra/Sox4/Sulf1/Tbx3/Wnt7b/Zmiz1
GO:0055082	cellular chemical homeostasis	0.370189	37	Atp1a3/Atp6v0a2/Atp6v0a4/Cacna1c/Cacna1g/Casr/Cxcl17/Epo/Ftl2-ps/Fzd9/Ghrl/Grin2a/Grin2b/Hap1/Htt/Il6st/Kcnma1/Kctd17/Nadk/Pawr/Pim3/Ptk2/Rap1gds1/Slamf8/Slc24a2/Slc39a13/Slc4a11/Slc4a5/Slc8a2/Slc9a1/Slc9a8/Slc9a9/Sox4/Stxbp4/Tmem178/Trpv4/Zbtb20
GO:0003014	renal system process	0.374492	6	Adcy6/Anpep/Cacna1c/Kcnma1/Slc4a5/Sulf1
GO:0050772	positive regulation of axonogenesis	0.374492	6	Crabp2/Dscam/Limk1/Ntn1/Plxna4/Plxnc1
GO:0055013	cardiac muscle cell development	0.374492	6	Fhod3/Myo18b/Myom3/Nebl/Pin1/Tbx3
GO:0071363	cellular response to growth factor stimulus	0.374599	31	Adam9/Adamts12/Akt1/Bmp7/Cav2/Chst11/Cldn5/Ctnnb1/Dab2ip/Dnm2/Fam89b/Fgfr3/Fgfr4/Fgfrl1/Hap1/Jun/Ldlrad4/Lrp2/Map3k1/Mir122/Mtss1l/Notch1/Pin1/Ptk2/Ptpn11/Rap1gap/Rapgef2/Sort1/Sulf1/Vil1/Wwox
GO:0006066	alcohol metabolic process	0.374683	14	Abca2/Akr7a5/Dhrs3/Disp3/Fdft1/Fgfr4/Gk5/Grk3/Ippk/Kcnma1/Pcbd2/Plb1/Pts/Srebf1
GO:0007229	integrin-mediated signaling pathway	0.379635	5	Itga11/Lims1/Phactr4/Ptk2/Ptpn11
GO:0016125	sterol metabolic process	0.380886	7	Abca2/Disp3/Ebpl/Fdft1/Lbr/Srebf1/Tm7sf2
GO:0043500	muscle adaptation	0.380886	7	Becn1/Nfatc1/Notch1/Nr4a3/Pin1/Ptk2/Slc9a1
GO:0010770	positive regulation of cell morphogenesis involved in differentiation	0.382484	10	Crabp2/Cux1/Dnm2/Dock1/Dscam/Limk1/Lims1/Ntn1/Plxna4/Plxnc1
GO:0007492	endoderm development	0.384331	4	Angpt4/Bptf/Ctnnb1/Notch1
GO:0032479	regulation of type I interferon production	0.384331	4	Ptpn11/Relb/Tlr9/Zbtb20
GO:0043113	receptor clustering	0.384331	4	Fzd9/Grin2b/Nme7/Scrib
GO:0086003	cardiac muscle cell contraction	0.384331	4	Cacna1c/Cacna1g/Cacnb2/Kcnn2
GO:0090398	cellular senescence	0.384331	4	Icmt/Pawr/Tbx3/Wnt16
GO:0048514	blood vessel morphogenesis	0.385112	32	Adam8/Adgrb1/Akt1/Angpt4/Anpep/Bcas3/Becn1/Col18a1/Ctnnb1/Cxcl17/Dab2ip/Egf/Epo/Fgfr4/Ghrl/Heg1/Hspg2/Jun/Lrp2/Mylk/Myo18b/Notch1/Pik3r6/Ptk2/Ptprm/Ramp1/Rapgef2/Rxra/Sox4/Sulf1/Wnt7b/Zmiz1
GO:0007160	cell-matrix adhesion	0.385182	11	Actn1/Adam8/Adam9/Adamts12/Bcas3/Col13a1/Ctnnb1/Itga11/Lims1/Plekha2/Ptk2
GO:0043270	positive regulation of ion transport	0.385359	16	Akt1/Cacnb2/Cacng2/Camk2a/Casr/Cracr2a/Dnm2/Dpp6/Grin2b/Hap1/Htt/Map2k6/Mylk/Slc6a1/Slc9a1/Stac
GO:0006575	cellular modified amino acid metabolic process	0.385621	8	Gamt/Ggt5/Hpn/Icmt/Mthfd1l/Pcyox1/Sardh/Slc5a5
GO:0000038	very long-chain fatty acid metabolic process	0.385889	2	Abcd2/Hsd17b4
GO:0001835	blastocyst hatching	0.385889	2	Ccdc24/Cmtm3
GO:0001919	regulation of receptor recycling	0.385889	2	Nsf/Scrib
GO:0006220	pyrimidine nucleotide metabolic process	0.385889	2	Dctpp1/Nme7
GO:0008608	attachment of spindle microtubules to kinetochore	0.385889	2	Becn1/Zfp207
GO:0014829	vascular smooth muscle contraction	0.385889	2	Cacna1g/Rap1gds1
GO:0021871	forebrain regionalization	0.385889	2	Six3/Wnt7b
GO:0033046	negative regulation of sister chromatid segregation	0.385889	2	Cdk5rap2/Zfp207
GO:0034405	response to fluid shear stress	0.385889	2	Akt1/Mtss1
GO:0035188	hatching	0.385889	2	Ccdc24/Cmtm3
GO:0042036	negative regulation of cytokine biosynthetic process	0.385889	2	Ghrl/Zfpm1
GO:0043171	peptide catabolic process	0.385889	2	Anpep/Ggt5
GO:0045577	regulation of B cell differentiation	0.385889	2	Card11/Tlr9
GO:0045672	positive regulation of osteoclast differentiation	0.385889	2	Ocstamp/Ppargc1b
GO:0045780	positive regulation of bone resorption	0.385889	2	Adam8/Ppargc1b
GO:0046852	positive regulation of bone remodeling	0.385889	2	Adam8/Ppargc1b
GO:0051180	vitamin transport	0.385889	2	Lrp2/Slc35f3
GO:0051294	establishment of spindle orientation	0.385889	2	Cdk5rap2/Htt
GO:0051654	establishment of mitochondrion localization	0.385889	2	Hap1/Nectin2
GO:0061842	microtubule organizing center localization	0.385889	2	Bicd2/Ezr
GO:0071684	organism emergence from protective structure	0.385889	2	Ccdc24/Cmtm3
GO:2000144	positive regulation of DNA-templated transcription, initiation	0.385889	2	Ctnnb1/Jun
GO:2000191	regulation of fatty acid transport	0.385889	2	Akt1/Map2k6
GO:2000406	positive regulation of T cell migration	0.385889	2	Adam8/Dock8
GO:0030183	B cell differentiation	0.387214	6	Card11/Fnip1/Fzd9/Malt1/Nfatc1/Tlr9
GO:0044070	regulation of anion transport	0.387214	6	Akt1/Fgfr4/Grin2b/Map2k6/Prkg2/Slc6a1
GO:0051701	interaction with host	0.387214	6	Cav2/Chmp4b/Nectin2/Rxra/Thoc1/Trim8
GO:0098739	import across plasma membrane	0.387214	6	Atp1a3/Lrp2/Pawr/Slc8a2/Slc9a1/Slc9a9
GO:2001023	regulation of response to drug	0.387214	6	Ghrl/Nr4a3/Pawr/Ptpn11/Syt13/Syt6
GO:0050678	regulation of epithelial cell proliferation	0.38727	18	Akt1/Cav2/Ctnnb1/Dab2ip/Fgfr3/Ghrl/Hpn/Jun/Lims1/Mtss1/Notch1/Nr4a3/Ptprm/Rap1gap/Sav1/Stxbp4/Sulf1/Wfdc1
GO:0031334	positive regulation of protein complex assembly	0.387364	12	Asap1/Carmil2/Cdk5rap2/Ctnnb1/Fnip1/Hip1r/Jun/Map3k1/Palld/Trabd2b/Vil1/Wipf1
GO:0099504	synaptic vesicle cycle	0.387364	12	Camk2a/Cdk5r1/Ctnnb1/Dnm2/Grm4/Pip5k1c/Ppfia2/Scrib/Stx11/Stx12/Syt13/Syt6
GO:0018198	peptidyl-cysteine modification	0.387612	3	Zdhhc12/Zdhhc22/Zdhhc3
GO:0021955	central nervous system neuron axonogenesis	0.387612	3	Dclk1/Plxna4/Ptk2
GO:0030520	intracellular estrogen receptor signaling pathway	0.387612	3	Ppargc1b/Safb/Zfp366
GO:0031076	embryonic camera-type eye development	0.387612	3	Bmp7/Phactr4/Six3
GO:0035088	establishment or maintenance of apical/basal cell polarity	0.387612	3	Ezr/Mtcl1/Scrib
GO:0035886	vascular smooth muscle cell differentiation	0.387612	3	Ctnnb1/Nfatc1/Notch1
GO:0045907	positive regulation of vasoconstriction	0.387612	3	Akt1/Casr/Hrh1
GO:0060323	head morphogenesis	0.387612	3	Col1a1/Crispld2/Ptpn11
GO:0061245	establishment or maintenance of bipolar cell polarity	0.387612	3	Ezr/Mtcl1/Scrib
GO:0061951	establishment of protein localization to plasma membrane	0.387612	3	Grip1/Nsf/Scrib
GO:0070231	T cell apoptotic process	0.387612	3	Adam8/Akt1/Dock8
GO:2000059	negative regulation of ubiquitin-dependent protein catabolic process	0.387612	3	Clec16a/Senp1/Smarcc1
GO:2000649	regulation of sodium ion transmembrane transporter activity	0.387612	3	Dnm2/Fxyd2/Slc9a1
GO:0022898	regulation of transmembrane transporter activity	0.389144	13	Cacnb2/Cacng2/Cbarp/Cracr2a/Dnm2/Epo/Fxyd2/Hap1/Htt/Shank2/Slc9a1/Stac/Tlr9
GO:0001843	neural tube closure	0.392539	7	Celsr1/Fzd6/Lrp2/Mthfd1l/Phactr4/Scrib/Tgif1
GO:0048640	negative regulation of developmental growth	0.392539	7	Aatk/Cdk5r1/Fgfr3/Ntn1/Ptk2/Rai1/Sav1
GO:0060606	tube closure	0.392539	7	Celsr1/Fzd6/Lrp2/Mthfd1l/Phactr4/Scrib/Tgif1
GO:0070665	positive regulation of leukocyte proliferation	0.392539	7	Card11/Carmil2/Epo/Il6st/Ocstamp/St6gal1/Tlr9
GO:1905952	regulation of lipid localization	0.392539	7	Abca2/Akt1/Egf/Ghrl/Map2k6/Osbpl11/Ptpn11
GO:0014066	regulation of phosphatidylinositol 3-kinase signaling	0.393781	5	Dab2ip/Ptk2/Ptpn13/Rgl2/Wnt16
GO:0034103	regulation of tissue remodeling	0.393781	5	Abr/Adam8/Erg/Fgfr3/Ppargc1b
GO:0051495	positive regulation of cytoskeleton organization	0.394261	11	Bcas3/Carmil2/Cdk5rap2/Hip1r/Limk1/Map3k1/Mtss1/Poc1a/Trpv4/Vil1/Wipf1
GO:0032868	response to insulin	0.396031	12	Akt1/Cav2/Ccnd3/Grb14/Otop1/Ptpn11/Slc9a1/Smarcc1/Sort1/Srebf1/Stxbp4/Trpv4
GO:0001890	placenta development	0.399367	9	Akt1/Bmp7/Bptf/Ghrl/Map3k4/Phlda2/Rxra/Snai1/Wnt7b
GO:0060041	retina development in camera-type eye	0.399367	9	Dscam/Man2a1/Mertk/Nphp4/Ptprm/Sdk1/Six3/Slc4a5/Tgif1
GO:0065004	protein-DNA complex assembly	0.399935	6	Brf2/Dmc1/H2afy/Hjurp/Ipo4/Shprh
GO:0006809	nitric oxide biosynthetic process	0.400476	4	Akt1/Dnm2/Hrh1/Tlr5
GO:0007127	meiosis I	0.400476	4	Chtf18/Dmc1/Eme2/Ercc4
GO:0007422	peripheral nervous system development	0.400476	4	Adgrg6/Akt1/Artn/Plxna4
GO:0070201	regulation of establishment of protein localization	0.400748	32	Adam9/Bcas3/Blk/Carmil2/Casr/Cdk5r1/Cep131/Crtam/Egf/Ezr/Ghrl/Hadh/Ica1/Lrp2/Midn/Mtcl1/Myo18a/Nadk/Oit1/Pim3/Ptpn11/Rhbdf1/Sox4/Srebf1/Sstr5/Stxbp4/Tlr5/Tlr9/Traf2/Trpv4/Wipf1/Xpo4
GO:0048285	organelle fission	0.401605	19	Becn1/Bmp7/Bora/Catsperz/Ccnd3/Ccnj/Cdk5rap2/Chmp4b/Chtf18/Dmc1/Egf/Eme2/Ercc4/Fgfr3/H2afy/Msto1/Nek6/Rps6ka2/Zfp207
GO:0016054	organic acid catabolic process	0.401613	10	Abcd2/Abhd2/Acsbg2/Akt1/Etfa/Hadh/Hal/Hsd17b4/Pcyox1/Sardh
GO:0045637	regulation of myeloid cell differentiation	0.401613	10	Adam8/Ctnnb1/Fgfr3/Jun/Ocstamp/Ppargc1b/Senp1/Tmem178/Zbtb16/Zfpm1
GO:0046395	carboxylic acid catabolic process	0.401613	10	Abcd2/Abhd2/Acsbg2/Akt1/Etfa/Hadh/Hal/Hsd17b4/Pcyox1/Sardh
GO:0007623	circadian rhythm	0.403353	11	Fbxl21/Gfpt1/Ghrl/Id4/Kcnma1/Ncoa2/Prkg2/Rai1/Relb/Six3/Srebf1
GO:0099173	postsynapse organization	0.403353	11	Adgrb1/Cdk5r1/Chmp4b/Farp1/Fzd9/Ghrl/Grin2b/Lrrc4b/Nptxr/Nrcam/Shank2
GO:0007051	spindle organization	0.404193	7	Bora/Chmp4b/Ezr/Mapre3/Msto1/Poc1a/Zfp207
GO:0016571	histone methylation	0.404193	7	Ctcfl/Ctnnb1/H2afy/Kdm4b/Nelfa/Prmt9/Tet2
GO:0043401	steroid hormone mediated signaling pathway	0.404193	7	Abhd2/Bmp7/Ncoa2/Ncor2/Ppargc1b/Safb/Zfp366
GO:0033365	protein localization to organelle	0.404442	36	Agap3/Akt1/Becn1/Bicd2/Bmp7/Cacng2/Camk2a/Cav2/Cep131/Chmp4b/Ciz1/Col1a1/Dclk1/Ezr/H2afy/Hspa4/Htt/Ing1/Ipo4/Lrp2/Mapre3/Neurl1b/Nptxr/Nvl/Pard6a/Pik3r4/Pin1/Rab3ip/Rtkn/Scrib/Six3/Srebf1/Srp14/Trim8/Zbtb16/Zdhhc3
GO:0080135	regulation of cellular response to stress	0.406332	31	Akt1/Cbs/Ctnnb1/Dab2ip/Epo/Ercc4/Erp27/Ezr/Icmt/Manf/Map3k1/Map3k4/Mcl1/Mecom/Nr4a3/Omg/Pawr/Ppp4c/Rmi2/Snai1/Thoc1/Tldc1/Tlr9/Tnfrsf19/Traf2/Trpv4/Ube2v2/Wdr76/Wnt16/Wnt7b/Xylt1
GO:0071496	cellular response to external stimulus	0.406589	14	Akt1/Becn1/Clec16a/Cnn2/Col1a1/Ctnnb1/Dctpp1/Fnip1/Jun/Piezo2/Pik3r4/Ppan/Ptpn11/Srebf1
GO:0030199	collagen fibril organization	0.406869	3	Col11a2/Col1a1/Loxl4
GO:0030517	negative regulation of axon extension	0.406869	3	Aatk/Cdk5r1/Ntn1
GO:0032210	regulation of telomere maintenance via telomerase	0.406869	3	Ctnnb1/Map3k4/Nek7
GO:0044058	regulation of digestive system process	0.406869	3	Ghrl/Hip1r/Pawr
GO:0070169	positive regulation of biomineral tissue development	0.406869	3	Bmp7/Fgfr3/Fzd9
GO:0070265	necrotic cell death	0.406869	3	Pygl/Spata2/Traf2
GO:1905818	regulation of chromosome separation	0.406869	3	Cdk5rap2/Nek6/Zfp207
GO:0010038	response to metal ion	0.40722	15	Adam9/Akt1/Cacna1g/Casp6/Casr/Grin2a/Htt/Jun/Kcnma1/Mtf1/Mylk/Rasa4/Rasgrp2/Syt13/Syt6
GO:0048015	phosphatidylinositol-mediated signaling	0.407255	8	Akt1/Dab2ip/Ezr/Pik3r6/Ptk2/Ptpn13/Rgl2/Wnt16
GO:0051899	membrane depolarization	0.407901	5	Cacna1c/Cacna1g/Cacnb2/Cacng2/Jun
GO:0006887	exocytosis	0.40828	18	Abr/Cacna1c/Cacna1g/Camk2a/Cbarp/Grm4/Hap1/Mical1/Notch1/Nr4a3/Nsf/Pip5k1c/Ppfia2/Scrib/Stx11/Syt13/Syt6/Washc3
GO:1903706	regulation of hemopoiesis	0.40828	18	Adam8/Card11/Carmil2/Ctnnb1/Fgfr3/Fnip1/Jun/Malt1/Notch1/Ocstamp/Pik3r6/Ppargc1b/Senp1/Tlr9/Tmem178/Zbtb16/Zfpm1/Zmiz1
GO:0048871	multicellular organismal homeostasis	0.408345	23	Adam8/Adcy6/Chmp4b/Col11a2/Ctnnb1/Esrrg/Ghrl/Hadh/Map2k6/Mir122/Notch1/Nphp4/Nr4a3/Plcl1/Ppargc1b/Ptpn11/Rcn3/Rhd/Tlr9/Trpv4/Ush1c/Ush2a/Whrn
GO:0006479	protein methylation	0.40951	9	Ctcfl/Ctnnb1/H2afy/Icmt/Kdm4b/Nelfa/Prmt9/Setd4/Tet2
GO:0008213	protein alkylation	0.40951	9	Ctcfl/Ctnnb1/H2afy/Icmt/Kdm4b/Nelfa/Prmt9/Setd4/Tet2
GO:0030902	hindbrain development	0.40951	9	Bmp7/Cbs/Cdk5r1/Ctnnb1/Egf/Hap1/Ptpn11/Scrib/Whrn
GO:2001257	regulation of cation channel activity	0.40951	9	Cacnb2/Cacng2/Cbarp/Cracr2a/Epo/Hap1/Htt/Shank2/Stac
GO:0002446	neutrophil mediated immunity	0.41106	2	Abr/Stx11
GO:0006826	iron ion transport	0.41106	2	Dnm2/Slc25a37
GO:0008207	C21-steroid hormone metabolic process	0.41106	2	Cyp2d22/Kcnma1
GO:0009303	rRNA transcription	0.41106	2	H2afy/Ippk
GO:0010569	regulation of double-strand break repair via homologous recombination	0.41106	2	Ppp4c/Rmi2
GO:0010737	protein kinase A signaling	0.41106	2	Ezr/Grin2b
GO:0021697	cerebellar cortex formation	0.41106	2	Ptpn11/Whrn
GO:0030212	hyaluronan metabolic process	0.41106	2	Ccnd3/Egf
GO:0030318	melanocyte differentiation	0.41106	2	Gna11/Lrmda
GO:0032094	response to food	0.41106	2	Akt1/Ghrl
GO:0032469	endoplasmic reticulum calcium ion homeostasis	0.41106	2	Kctd17/Rap1gds1
GO:0032878	regulation of establishment or maintenance of cell polarity	0.41106	2	Bcas3/Dock8
GO:0034122	negative regulation of toll-like receptor signaling pathway	0.41106	2	Dab2ip/Tlr9
GO:0034453	microtubule anchoring	0.41106	2	Bicd2/Cep350
GO:0043044	ATP-dependent chromatin remodeling	0.41106	2	Hjurp/Smarcc1
GO:0045005	DNA-dependent DNA replication maintenance of fidelity	0.41106	2	Eme2/Thoc1
GO:0045745	positive regulation of G protein-coupled receptor signaling pathway	0.41106	2	Acpp/Cav2
GO:0050927	positive regulation of positive chemotaxis	0.41106	2	Artn/Casr
GO:0051984	positive regulation of chromosome segregation	0.41106	2	Becn1/H2afy
GO:0060236	regulation of mitotic spindle organization	0.41106	2	Bora/Chmp4b
GO:0060969	negative regulation of gene silencing	0.41106	2	Atad2b/Ncor2
GO:0070266	necroptotic process	0.41106	2	Pygl/Spata2
GO:0071391	cellular response to estrogen stimulus	0.41106	2	Bcas3/Ocstamp
GO:0090314	positive regulation of protein targeting to membrane	0.41106	2	Cdk5r1/Mtcl1
GO:0097107	postsynaptic density assembly	0.41106	2	Lrrc4b/Shank2
GO:1900273	positive regulation of long-term synaptic potentiation	0.41106	2	Grin2a/Grin2b
GO:2000403	positive regulation of lymphocyte migration	0.41106	2	Adam8/Dock8
GO:0032886	regulation of microtubule-based process	0.412454	11	Bicd2/Bora/Cdk5r1/Cdk5rap2/Cep131/Chmp4b/Ctnnb1/Hap1/Mapre3/Poc1a/Trpv4
GO:0007018	microtubule-based movement	0.414095	13	Bicd2/Cep131/Dnah10/Dnah17/Dnah8/Dnah9/Hap1/Htt/Kif6/Kifc3/Nme7/Tekt2/Wdr34
GO:0001707	mesoderm formation	0.416545	4	Bmp7/Htt/Nr4a3/Snai1
GO:0032465	regulation of cytokinesis	0.416545	4	Becn1/Pik3r4/Pin1/Sstr5
GO:0032606	type I interferon production	0.416545	4	Ptpn11/Relb/Tlr9/Zbtb20
GO:0048008	platelet-derived growth factor receptor signaling pathway	0.416545	4	Hip1/Hip1r/Nr4a3/Ptpn11
GO:1903557	positive regulation of tumor necrosis factor superfamily cytokine production	0.416545	4	Adam8/Ptpn11/Tlr9/Zbtb20
GO:0010952	positive regulation of peptidase activity	0.418071	8	Antxr1/Grin2b/Hip1/Hip1r/Mtch1/Pawr/Rcn3/Senp1
GO:0014013	regulation of gliogenesis	0.418071	8	Ctnnb1/Fgfr3/Id4/Il6st/Lrp2/Notch1/Ptk2/Tenm4
GO:0030833	regulation of actin filament polymerization	0.418071	8	Add2/Capg/Carmil2/Fhod3/Hip1r/Map3k1/Vil1/Wipf1
GO:0055007	cardiac muscle cell differentiation	0.418071	8	Fhod3/Myo18b/Myom3/Nebl/Pin1/Rxra/Slc9a1/Tbx3
GO:1903169	regulation of calcium ion transmembrane transport	0.418071	8	Cacnb2/Cbarp/Cracr2a/Hap1/Htt/Slc9a1/Stac/Tlr9
GO:0002703	regulation of leukocyte mediated immunity	0.419651	9	Abr/Crtam/Malt1/Nectin2/Pik3r6/Tap2/Thoc1/Tlr9/Traf2
GO:0034767	positive regulation of ion transmembrane transport	0.419651	9	Cacnb2/Cacng2/Cracr2a/Dnm2/Dpp6/Hap1/Htt/Slc9a1/Stac
GO:0090087	regulation of peptide transport	0.421728	32	Adam9/Bcas3/Blk/Carmil2/Casr/Cdk5r1/Cep131/Crtam/Egf/Ezr/Ghrl/Hadh/Ica1/Lrp2/Midn/Mtcl1/Myo18a/Nadk/Oit1/Pim3/Ptpn11/Rhbdf1/Sox4/Srebf1/Sstr5/Stxbp4/Tlr5/Tlr9/Traf2/Trpv4/Wipf1/Xpo4
GO:0000724	double-strand break repair via homologous recombination	0.421976	5	Dmc1/Ercc4/Ppp4c/Rad51b/Rmi2
GO:0000725	recombinational repair	0.421976	5	Dmc1/Ercc4/Ppp4c/Rad51b/Rmi2
GO:0006641	triglyceride metabolic process	0.421976	5	Ccnc/Gk5/Il6st/Ptpn11/Srebf1
GO:0034728	nucleosome organization	0.421976	5	H2afy/Hjurp/Ipo4/Shprh/Smarcc1
GO:0040014	regulation of multicellular organism growth	0.421976	5	Ezr/Gamt/Ptpn11/Rai1/Vil1
GO:0070167	regulation of biomineral tissue development	0.421976	5	Bmp7/Fgfr3/Fzd9/Notch1/Rflna
GO:0010001	glial cell differentiation	0.422089	12	Adgrg6/Akt1/Ctnnb1/Eif2b5/Fgfr3/Id4/Il6st/Notch1/Omg/Ptpn11/Sox4/Tenm4
GO:0022407	regulation of cell-cell adhesion	0.422099	19	Adam8/Akt1/Bmp7/Card11/Carmil2/Dock8/Epo/Il6st/Kif26b/Malt1/Nr4a3/Pawr/Pik3r6/Podxl/Ptk2/Rap1gap/Trpv4/Zbtb16/Zmiz1
GO:0046425	regulation of JAK-STAT cascade	0.425317	6	Cdk5r1/Egf/Epo/Fgfr3/Il6st/Notch1
GO:0043269	regulation of ion transport	0.425618	34	Akt1/Cacna1c/Cacna1g/Cacnb2/Cacng2/Camk2a/Casr/Cbarp/Cracr2a/Ctnnb1/Dnm2/Dpp6/Egf/Epo/Fgfr4/Fxyd2/Grin2b/Hap1/Homer3/Htt/Kcnma1/Kcnq4/Map2k6/Mylk/Pawr/Prkg2/Rcvrn/Shank2/Slc6a1/Slc9a1/Stac/Syt13/Syt6/Tlr9
GO:0030260	entry into host cell	0.425941	3	Cav2/Nectin2/Trim8
GO:0030901	midbrain development	0.425941	3	Ctnnb1/Fgfr3/Fzd6
GO:0031103	axon regeneration	0.425941	3	Jun/Omg/Xylt1
GO:0031122	cytoplasmic microtubule organization	0.425941	3	Ezr/Katnal1/Trpv4
GO:0031529	ruffle organization	0.425941	3	Carmil2/Mtss1l/Palld
GO:0042531	positive regulation of tyrosine phosphorylation of STAT protein	0.425941	3	Epo/Fgfr3/Il6st
GO:0044409	entry into host	0.425941	3	Cav2/Nectin2/Trim8
GO:0051806	entry into cell of other organism involved in symbiotic interaction	0.425941	3	Cav2/Nectin2/Trim8
GO:0051828	entry into other organism involved in symbiotic interaction	0.425941	3	Cav2/Nectin2/Trim8
GO:0055078	sodium ion homeostasis	0.425941	3	Anpep/Atp1a3/Slc9a1
GO:0099084	postsynaptic specialization organization	0.425941	3	Lrrc4b/Nptxr/Shank2
GO:2000107	negative regulation of leukocyte apoptotic process	0.425941	3	Dock8/Mertk/St6gal1
GO:0001889	liver development	0.427469	7	Hpn/Icmt/Jun/Lims1/Man2a1/Notch1/Tet2
GO:1900180	regulation of protein localization to nucleus	0.427469	7	Akt1/Cav2/Dclk1/Htt/Nvl/Pin1/Trim8
GO:0048608	reproductive structure development	0.42748	22	Akt1/Amh/Bmp7/Bptf/Ctnnb1/Dmc1/Eif2b5/Ghrl/Hsd17b4/Id4/Lrp2/Map3k4/Mertk/Notch1/Phlda2/Psapl1/Ptpn11/Rxra/Snai1/Sulf1/Tbx3/Wnt7b
GO:0060402	calcium ion transport into cytosol	0.428876	8	Cacna1g/Epo/Grin2a/Grin2b/Hap1/Htt/Pawr/Slc8a2
GO:0051100	negative regulation of binding	0.429786	9	Akt1/Ercc4/Fam192a/Hspa4/Id4/Jun/Pin1/Rap1gap/Zfpm1
GO:0033044	regulation of chromosome organization	0.430117	16	Atad2b/Becn1/Cdk5rap2/Ctcfl/Ctnnb1/Ercc4/H2afy/Kdm4b/Map3k4/Nek6/Nek7/Nelfa/Rmi2/Rps6ka5/Srebf1/Zfp207
GO:0007269	neurotransmitter secretion	0.430349	10	Camk2a/Celsr1/Grm4/Ica1/Ppfia2/Scrib/Sncaip/Stx11/Syt13/Syt6
GO:0048771	tissue remodeling	0.430349	10	Abr/Adam8/Cbs/Ctnnb1/Efna4/Erg/Fgfr3/Mertk/Ppargc1b/Wnt16
GO:0099643	signal release from synapse	0.430349	10	Camk2a/Celsr1/Grm4/Ica1/Ppfia2/Scrib/Sncaip/Stx11/Syt13/Syt6
GO:0071560	cellular response to transforming growth factor beta stimulus	0.430782	12	Adam9/Cav2/Chst11/Cldn5/Dnm2/Fam89b/Jun/Ldlrad4/Map3k1/Pin1/Ptk2/Wwox
GO:0019217	regulation of fatty acid metabolic process	0.432515	4	Abcd2/Akt1/Nr4a3/Srebf1
GO:0032890	regulation of organic acid transport	0.432515	4	Akt1/Grin2b/Map2k6/Slc6a1
GO:0050771	negative regulation of axonogenesis	0.432515	4	Aatk/Cdk5r1/Ntn1/Ptk2
GO:1904888	cranial skeletal system development	0.432515	4	Chst11/Ctnnb1/Mthfd1l/Slc39a3
GO:0001963	synaptic transmission, dopaminergic	0.43571	2	Drd5/Kcnq4
GO:0002369	T cell cytokine production	0.43571	2	Malt1/Traf2
GO:0008340	determination of adult lifespan	0.43571	2	Htt/Icmt
GO:0009225	nucleotide-sugar metabolic process	0.43571	2	Gfpt1/Mgat1
GO:0014821	phasic smooth muscle contraction	0.43571	2	Ghrl/Kcnma1
GO:0042634	regulation of hair cycle	0.43571	2	Ctnnb1/Nfatc1
GO:0045047	protein targeting to ER	0.43571	2	Chmp4b/Srp14
GO:0045616	regulation of keratinocyte differentiation	0.43571	2	H2afy/Notch1
GO:0045671	negative regulation of osteoclast differentiation	0.43571	2	Ctnnb1/Tmem178
GO:0045740	positive regulation of DNA replication	0.43571	2	Ciz1/Jun
GO:0048103	somatic stem cell division	0.43571	2	Dct/Notch1
GO:0050909	sensory perception of taste	0.43571	2	Pkd2l1/Reep2
GO:0050926	regulation of positive chemotaxis	0.43571	2	Artn/Casr
GO:0051957	positive regulation of amino acid transport	0.43571	2	Grin2b/Slc6a1
GO:0060117	auditory receptor cell development	0.43571	2	Scrib/Whrn
GO:0070207	protein homotrimerization	0.43571	2	Pkd2l1/Traf2
GO:0090207	regulation of triglyceride metabolic process	0.43571	2	Ccnc/Srebf1
GO:0090218	positive regulation of lipid kinase activity	0.43571	2	Fgfr3/Pik3r4
GO:1903170	negative regulation of calcium ion transmembrane transport	0.43571	2	Cbarp/Tlr9
GO:1904037	positive regulation of epithelial cell apoptotic process	0.43571	2	Col18a1/Sort1
GO:1905606	regulation of presynapse assembly	0.43571	2	Farp1/Lrrc4b
GO:2000036	regulation of stem cell population maintenance	0.43571	2	Bmp7/Sav1
GO:0019218	regulation of steroid metabolic process	0.435989	5	Fgfr4/Hrh1/Kcnma1/Snai1/Srebf1
GO:0070252	actin-mediated cell contraction	0.435989	5	Cacna1c/Cacna1g/Cacnb2/Kcnn2/Vil1
GO:1903825	organic acid transmembrane transport	0.435989	5	Akt1/Lrp2/Slc13a3/Slc16a3/Slc25a22
GO:1905039	carboxylic acid transmembrane transport	0.435989	5	Akt1/Lrp2/Slc13a3/Slc16a3/Slc25a22
GO:2000379	positive regulation of reactive oxygen species metabolic process	0.435989	5	Adgrb1/Akt1/Dnm2/Hrh1/Tlr5
GO:0042060	wound healing	0.43702	17	Carmil2/Celsr1/Cnn2/Col1a1/Drd5/Fzd6/Fzd9/Lgr6/Map3k1/Mertk/Mylk/Ninj2/Pip5k1c/Ppl/Scrib/Vil1/Wfdc1
GO:1903829	positive regulation of cellular protein localization	0.438142	15	Akt1/Bcas3/Cacng2/Cav2/Cdk5r1/Cep131/Dpp6/Ezr/Mtcl1/Pard6a/Stac/Trim8/Vil1/Wipf1/Xpo4
GO:0070848	response to growth factor	0.438386	31	Adam9/Adamts12/Akt1/Bmp7/Cav2/Chst11/Cldn5/Ctnnb1/Dab2ip/Dnm2/Fam89b/Fgfr3/Fgfr4/Fgfrl1/Hap1/Jun/Ldlrad4/Lrp2/Map3k1/Mir122/Mtss1l/Notch1/Pin1/Ptk2/Ptpn11/Rap1gap/Rapgef2/Sort1/Sulf1/Vil1/Wwox
GO:0060560	developmental growth involved in morphogenesis	0.438644	14	Aatk/Cdk5r1/Crabp2/Ctnnb1/Dclk1/Dnm2/Dscam/Kif26b/Limk1/Notch1/Ntn1/Omg/Plxna4/Wnt7b
GO:0007189	adenylate cyclase-activating G protein-coupled receptor signaling pathway	0.43907	7	Adcy6/Adgrb1/Adgrg6/Adgrl2/Drd5/Ramp1/Rapgef2
GO:0031333	negative regulation of protein complex assembly	0.43907	7	Add2/Capg/Carmil2/Fhod3/Hip1r/Ldlrad4/Vil1
GO:0045580	regulation of T cell differentiation	0.43907	7	Adam8/Card11/Carmil2/Malt1/Pik3r6/Zbtb16/Zmiz1
GO:0061008	hepaticobiliary system development	0.43907	7	Hpn/Icmt/Jun/Lims1/Man2a1/Notch1/Tet2
GO:2000058	regulation of ubiquitin-dependent protein catabolic process	0.43907	7	Akt1/Clec16a/Egf/Ptk2/Senp1/Smarcc1/Ube2v2
GO:0006941	striated muscle contraction	0.439661	8	Aldoa/Atp1a3/Cacna1c/Cacna1g/Cacnb2/Kcnn2/Map2k6/Slc9a1
GO:0043902	positive regulation of multi-organism process	0.439661	8	Cav2/Chmp4b/Hpn/Jun/Mvb12b/Notch1/Nr5a2/Plb1
GO:0048017	inositol lipid-mediated signaling	0.439661	8	Akt1/Dab2ip/Ezr/Pik3r6/Ptk2/Ptpn13/Rgl2/Wnt16
GO:0048545	response to steroid hormone	0.439755	11	Abhd2/Adam9/Bmp7/Kcnma1/Ncoa2/Ncor2/Ppargc1b/Rxra/Safb/Sstr5/Zfp366
GO:0009755	hormone-mediated signaling pathway	0.439908	9	Abhd2/Bmp7/Ncoa2/Ncor2/Nr5a2/Ppargc1b/Ptpn11/Safb/Zfp366
GO:0042098	T cell proliferation	0.439908	9	Card11/Carmil2/Ccnd3/Ctnnb1/Dock8/Epo/Il6st/Malt1/Pawr
GO:0043409	negative regulation of MAPK cascade	0.439908	9	Akt1/Bmp7/Camk2n1/Dab2ip/Dusp16/Ezr/Mecom/Pin1/Ptprr
GO:0050731	positive regulation of peptidyl-tyrosine phosphorylation	0.439908	9	Angpt4/Cav2/Egf/Epo/Fgfr3/Gfra1/Il11/Il6st/Tnk2
GO:0061458	reproductive system development	0.440193	22	Akt1/Amh/Bmp7/Bptf/Ctnnb1/Dmc1/Eif2b5/Ghrl/Hsd17b4/Id4/Lrp2/Map3k4/Mertk/Notch1/Phlda2/Psapl1/Ptpn11/Rxra/Snai1/Sulf1/Tbx3/Wnt7b
GO:0042391	regulation of membrane potential	0.441008	21	Akt1/Atp1a3/Cacna1c/Cacna1g/Cacnb2/Cacng2/Dpp6/Ghrl/Gna11/Grin2a/Grin2b/Htt/Igsf9b/Jun/Kcnma1/Kcnn2/Nrcam/Pawr/Piezo2/Shank2/Slc9a1
GO:0001974	blood vessel remodeling	0.444793	3	Abr/Cbs/Erg
GO:0002762	negative regulation of myeloid leukocyte differentiation	0.444793	3	Ctnnb1/Tmem178/Zfpm1
GO:0003341	cilium movement	0.444793	3	Dnah10/Nme7/Tekt2
GO:0008333	endosome to lysosome transport	0.444793	3	Cacng2/Clec16a/Sort1
GO:0031343	positive regulation of cell killing	0.444793	3	Crtam/Nectin2/Tap2
GO:0034394	protein localization to cell surface	0.444793	3	Akt1/Ctnnb1/Egf
GO:0044060	regulation of endocrine process	0.444793	3	Fgfr4/Ghrl/Ptpn11
GO:0048701	embryonic cranial skeleton morphogenesis	0.444793	3	Chst11/Mthfd1l/Slc39a3
GO:0061005	cell differentiation involved in kidney development	0.444793	3	Ctnnb1/Mtss1/Notch1
GO:0099024	plasma membrane invagination	0.444793	3	Adgrb1/Becn1/Xkr8
GO:0032409	regulation of transporter activity	0.447418	13	Cacnb2/Cacng2/Cbarp/Cracr2a/Dnm2/Epo/Fxyd2/Hap1/Htt/Shank2/Slc9a1/Stac/Tlr9
GO:1903037	regulation of leukocyte cell-cell adhesion	0.447418	13	Adam8/Akt1/Card11/Carmil2/Dock8/Epo/Il6st/Malt1/Nr4a3/Pawr/Pik3r6/Zbtb16/Zmiz1
GO:0031341	regulation of cell killing	0.448363	4	Crtam/Nectin2/Pik3r6/Tap2
GO:0046209	nitric oxide metabolic process	0.448363	4	Akt1/Dnm2/Hrh1/Tlr5
GO:0046427	positive regulation of JAK-STAT cascade	0.448363	4	Epo/Fgfr3/Il6st/Notch1
GO:0050810	regulation of steroid biosynthetic process	0.448363	4	Fgfr4/Hrh1/Snai1/Srebf1
GO:0051225	spindle assembly	0.448363	4	Chmp4b/Mapre3/Msto1/Zfp207
GO:0061982	meiosis I cell cycle process	0.448363	4	Chtf18/Dmc1/Eme2/Ercc4
GO:0090559	regulation of membrane permeability	0.448363	4	Camk2a/Hip1r/Htt/Slc9a1
GO:0140053	mitochondrial gene expression	0.448363	4	Gatb/Mrps27/Mtg2/Ppargc1b
GO:0010810	regulation of cell-substrate adhesion	0.44884	11	Bcas3/Col1a1/Dnm2/Dock1/Egflam/Fbln2/Lims1/Notch1/Plekha2/Ptk2/St6gal1
GO:0032869	cellular response to insulin stimulus	0.449469	10	Akt1/Cav2/Ccnd3/Grb14/Otop1/Ptpn11/Slc9a1/Smarcc1/Srebf1/Stxbp4
GO:0060562	epithelial tube morphogenesis	0.44949	19	Adamts12/Bmp7/Casr/Celsr1/Ctnnb1/Egf/Fzd6/Kif26b/Lrp2/Mthfd1l/Mtss1/Nfatc1/Notch1/Ntn1/Phactr4/Scrib/Sox4/Tbx3/Tgif1
GO:0072525	pyridine-containing compound biosynthetic process	0.449927	5	Aldoa/Dhtkd1/Htt/Nadk/Zbtb20
GO:1901879	regulation of protein depolymerization	0.449927	5	Add2/Capg/Carmil2/Trpv4/Vil1
GO:0002685	regulation of leukocyte migration	0.45042	8	Abr/Adam8/Akt1/Cxcl17/Dock8/Pawr/Slamf8/Trpv4
GO:0050905	neuromuscular process	0.45042	8	Abr/Camta1/Grin2a/Grin2b/Icmt/Kcnma1/Nr4a3/Ush1c
GO:0006638	neutral lipid metabolic process	0.45054	6	Abhd2/Ccnc/Gk5/Il6st/Ptpn11/Srebf1
GO:0006639	acylglycerol metabolic process	0.45054	6	Abhd2/Ccnc/Gk5/Il6st/Ptpn11/Srebf1
GO:0007292	female gamete generation	0.45054	6	Amh/Ctnnb1/Dmc1/Grb14/Rps6ka2/Zmiz1
GO:0008645	hexose transmembrane transport	0.45054	6	Akt1/Nr4a3/Ptpn11/Slc2a9/Sort1/Stxbp4
GO:0050953	sensory perception of light stimulus	0.45054	6	Cacnb2/Col1a1/Rcvrn/Ush1c/Ush2a/Whrn
GO:1903900	regulation of viral life cycle	0.45054	6	Cav2/Chmp4b/Nectin2/Notch1/Nr5a2/Trim8
GO:1904659	glucose transmembrane transport	0.45054	6	Akt1/Nr4a3/Ptpn11/Slc2a9/Sort1/Stxbp4
GO:2001251	negative regulation of chromosome organization	0.45054	6	Atad2b/Cdk5rap2/Ercc4/H2afy/Kdm4b/Zfp207
GO:0001936	regulation of endothelial cell proliferation	0.450635	7	Akt1/Cav2/Fgfr3/Ghrl/Jun/Ptprm/Sulf1
GO:0009566	fertilization	0.450635	7	Abhd2/Aldoa/Nectin2/Plb1/Spesp1/Spink13/Syt6
GO:0097696	STAT cascade	0.450635	7	Egf/Epo/Fgfr3/Ifnl2/Il6st/Notch1/Ptprt
GO:0007178	transmembrane receptor protein serine/threonine kinase signaling pathway	0.451517	17	Adam9/Bmp7/Cav2/Chst11/Cldn5/Dnm2/Fam89b/Jun/Ldlrad4/Lrp2/Map3k1/Mir122/Notch1/Pin1/Ptk2/Sulf1/Tgif1
GO:0001945	lymph vessel development	0.459789	2	Heg1/Nfatc1
GO:0002548	monocyte chemotaxis	0.459789	2	Cxcl17/Slamf8
GO:0006739	NADP metabolic process	0.459789	2	Me1/Nadk
GO:0006903	vesicle targeting	0.459789	2	Arfgap3/Scrib
GO:0007617	mating behavior	0.459789	2	Drd5/Ncoa2
GO:0009954	proximal/distal pattern formation	0.459789	2	Ctnnb1/Six3
GO:0010591	regulation of lamellipodium assembly	0.459789	2	Carmil2/Dnm2
GO:0010922	positive regulation of phosphatase activity	0.459789	2	Pawr/Ppargc1b
GO:0014044	Schwann cell development	0.459789	2	Adgrg6/Akt1
GO:0021952	central nervous system projection neuron axonogenesis	0.459789	2	Dclk1/Plxna4
GO:0022011	myelination in peripheral nervous system	0.459789	2	Adgrg6/Akt1
GO:0031057	negative regulation of histone modification	0.459789	2	H2afy/Kdm4b
GO:0031638	zymogen activation	0.459789	2	Hpn/Pawr
GO:0032292	peripheral nervous system axon ensheathment	0.459789	2	Adgrg6/Akt1
GO:0040019	positive regulation of embryonic development	0.459789	2	Ctnnb1/Tenm4
GO:0043537	negative regulation of blood vessel endothelial cell migration	0.459789	2	Angpt4/Notch1
GO:0045070	positive regulation of viral genome replication	0.459789	2	Notch1/Nr5a2
GO:0048679	regulation of axon regeneration	0.459789	2	Omg/Xylt1
GO:0048821	erythrocyte development	0.459789	2	Epo/Rhd
GO:0050869	negative regulation of B cell activation	0.459789	2	Pawr/Thoc1
GO:0055083	monovalent inorganic anion homeostasis	0.459789	2	Fgfr4/Ptk2
GO:0060441	epithelial tube branching involved in lung morphogenesis	0.459789	2	Celsr1/Ctnnb1
GO:0060487	lung epithelial cell differentiation	0.459789	2	Ncor2/Sav1
GO:0071398	cellular response to fatty acid	0.459789	2	Adcy6/Akt1
GO:0010634	positive regulation of epithelial cell migration	0.461145	8	Adam9/Akt1/Angpt4/Bcas3/Capn7/Dock1/Jun/Vil1
GO:0031099	regeneration	0.462154	7	Fzd9/Jun/Lgr6/Matn2/Ninj2/Omg/Xylt1
GO:1903046	meiotic cell cycle process	0.462154	7	Catsperz/Chtf18/Dmc1/Eme2/Ercc4/Grb14/Rps6ka2
GO:0048167	regulation of synaptic plasticity	0.462656	14	Adgrb1/Camk2a/Drd5/Grin2a/Grin2b/Hrh1/Htt/Kcnn2/Mirlet7i/Rapgef2/Shank2/Slc24a2/Slc8a2/Sorcs3
GO:0003300	cardiac muscle hypertrophy	0.463062	6	Becn1/Notch1/Nr4a3/Pin1/Ptk2/Slc9a1
GO:0015749	monosaccharide transmembrane transport	0.463062	6	Akt1/Nr4a3/Ptpn11/Slc2a9/Sort1/Stxbp4
GO:0046717	acid secretion	0.463062	6	Casr/Ghrl/Grin2b/Hip1r/Map2k6/Slc6a1
GO:0055076	transition metal ion homeostasis	0.463062	6	Atp6v0a2/Ftl2-ps/Htt/Mir122/Rhd/Slc39a13
GO:0007585	respiratory gaseous exchange	0.463396	3	Chst11/Man2a1/Mtg2
GO:0010761	fibroblast migration	0.463396	3	Akt1/Rffl/Tns1
GO:0017145	stem cell division	0.463396	3	Dct/Notch1/Zbtb16
GO:0019080	viral gene expression	0.463396	3	Hpn/Jun/Trim8
GO:0045687	positive regulation of glial cell differentiation	0.463396	3	Il6st/Notch1/Tenm4
GO:0070988	demethylation	0.463396	3	Kdm4b/Stpg4/Tet2
GO:0072665	protein localization to vacuole	0.463396	3	Becn1/Cacng2/Pik3r4
GO:0090311	regulation of protein deacetylation	0.463396	3	Fry/Ncor2/Srebf1
GO:0019751	polyol metabolic process	0.463772	5	Gk5/Grk3/Ippk/Pcbd2/Pts
GO:0034333	adherens junction assembly	0.463772	5	Actn1/Bcas3/Ctnnb1/Lims1/Ptk2
GO:0060993	kidney morphogenesis	0.463772	5	Bmp7/Ctnnb1/Kif26b/Sox4/Wnt7b
GO:0099003	vesicle-mediated transport in synapse	0.464039	13	Camk2a/Ctnnb1/Dnm2/Grip1/Grm4/Hap1/Pip5k1c/Ppfia2/Scrib/Stx11/Stx12/Syt13/Syt6
GO:0019229	regulation of vasoconstriction	0.464069	4	Akt1/Cacna1c/Casr/Hrh1
GO:0030500	regulation of bone mineralization	0.464069	4	Bmp7/Fgfr3/Fzd9/Rflna
GO:0031123	RNA 3'-end processing	0.464069	4	Cpsf4l/Ints1/Ints7/Rps21
GO:0031497	chromatin assembly	0.464069	4	H2afy/Hjurp/Ipo4/Shprh
GO:0061178	regulation of insulin secretion involved in cellular response to glucose stimulus	0.464069	4	Ghrl/Nadk/Pim3/Stxbp4
GO:0061515	myeloid cell development	0.464069	4	Epo/Ptpn11/Rhd/Zfpm1
GO:2001057	reactive nitrogen species metabolic process	0.464069	4	Akt1/Dnm2/Hrh1/Tlr5
GO:0050770	regulation of axonogenesis	0.466959	11	Aatk/Cdk5r1/Crabp2/Dnm2/Dscam/Limk1/Ntn1/Omg/Plxna4/Plxnc1/Ptk2
GO:0071407	cellular response to organic cyclic compound	0.467035	21	Abhd2/Adcy6/Akt1/Bmp7/Casp6/Ctnnb1/Dnm2/Drd5/Ezr/Hrh1/Ncoa2/Ncor2/Nr4a3/Osbpl7/Ppargc1b/Rapgef2/Safb/Slc9a1/Sstr5/Tlr9/Zfp366
GO:1990845	adaptive thermogenesis	0.471828	8	Esrrg/Ghrl/Hadh/Map2k6/Notch1/Plcl1/Ppargc1b/Trpv4
GO:0048732	gland development	0.471968	22	Bmp7/Carmil2/Ctnnb1/Edaradd/Egf/Hpn/Icmt/Id4/Jun/Lims1/Man2a1/Notch1/Ntn1/Oas2/Psapl1/Rap1gap/Rxra/Scrib/Six3/Sulf1/Tbx3/Tet2
GO:0006694	steroid biosynthetic process	0.473618	7	Fdft1/Fgfr4/Hrh1/Lbr/Snai1/Srebf1/Tm7sf2
GO:0071559	response to transforming growth factor beta	0.474103	12	Adam9/Cav2/Chst11/Cldn5/Dnm2/Fam89b/Jun/Ldlrad4/Map3k1/Pin1/Ptk2/Wwox
GO:0014896	muscle hypertrophy	0.47551	6	Becn1/Notch1/Nr4a3/Pin1/Ptk2/Slc9a1
GO:0014897	striated muscle hypertrophy	0.47551	6	Becn1/Notch1/Nr4a3/Pin1/Ptk2/Slc9a1
GO:0034219	carbohydrate transmembrane transport	0.47551	6	Akt1/Nr4a3/Ptpn11/Slc2a9/Sort1/Stxbp4
GO:0051168	nuclear export	0.47551	6	Malt1/Ptpn11/Rps15/Thoc1/Wipf1/Xpo4
GO:1901215	negative regulation of neuron death	0.475984	11	Adam8/Chmp4b/Ctnnb1/Epo/Fzd9/Htt/Jun/Nr4a3/Pin1/Tldc1/Ube2v2
GO:0001906	cell killing	0.477513	5	Crtam/Nectin2/Pik3r6/Stx11/Tap2
GO:0007044	cell-substrate junction assembly	0.477513	5	Actn1/Bcas3/Lims1/Ptk2/Tns1
GO:0042136	neurotransmitter biosynthetic process	0.477513	5	Akt1/Cyp2d22/Dnm2/Hrh1/Tlr5
GO:0051651	maintenance of location in cell	0.477513	5	Adcy6/Akt1/Ciz1/Ftl2-ps/Pip5k1c
GO:1901657	glycosyl compound metabolic process	0.477513	5	Acpp/Akr7a5/Gamt/Icmt/Nme7
GO:0071241	cellular response to inorganic substance	0.477986	10	Akt1/Grin2a/Jun/Mylk/Nsmce3/Rasa4/Rasgrp2/Syt13/Syt6/Traf2
GO:0010833	telomere maintenance via telomere lengthening	0.479614	4	Ctnnb1/Ercc4/Map3k4/Nek7
GO:0034644	cellular response to UV	0.479614	4	1700007K13Rik/Agap3/Ercc4/Nsmce3
GO:0046889	positive regulation of lipid biosynthetic process	0.479614	4	Abcd2/Akt1/Srebf1/Zbtb20
GO:0097755	positive regulation of blood vessel diameter	0.479614	4	Casr/Kcnma1/Ptk2/Ptprm
GO:0007029	endoplasmic reticulum organization	0.481721	3	Cav2/Htt/Reep2
GO:0021587	cerebellum morphogenesis	0.481721	3	Cbs/Ptpn11/Whrn
GO:0032482	Rab protein signal transduction	0.481721	3	Aatk/Rab37/Rab44
GO:0032543	mitochondrial translation	0.481721	3	Gatb/Mrps27/Mtg2
GO:0034121	regulation of toll-like receptor signaling pathway	0.481721	3	Dab2ip/Tlr5/Tlr9
GO:0045840	positive regulation of mitotic nuclear division	0.481721	3	Becn1/Egf/H2afy
GO:0051930	regulation of sensory perception of pain	0.481721	3	Acpp/Grin2a/Slc9a1
GO:1903533	regulation of protein targeting	0.481721	3	Cdk5r1/Mtcl1/Srebf1
GO:0046394	carboxylic acid biosynthetic process	0.482361	16	Abcd2/Abhd2/Aldoa/Cbs/Ccnd3/Dhtkd1/Egf/Fads3/Fgfr4/Gamt/Ggt5/Htt/Mthfd1l/Sephs1/Srebf1/Zbtb20
GO:0001990	regulation of systemic arterial blood pressure by hormone	0.483259	2	Drd5/Rps6ka2
GO:0032757	positive regulation of interleukin-8 production	0.483259	2	Tlr5/Tlr9
GO:0033032	regulation of myeloid cell apoptotic process	0.483259	2	Epo/St6gal1
GO:0033119	negative regulation of RNA splicing	0.483259	2	Ptbp2/Srsf4
GO:0042073	intraciliary transport	0.483259	2	Cep131/Nme7
GO:0048009	insulin-like growth factor receptor signaling pathway	0.483259	2	Akt1/Gigyf1
GO:0048194	Golgi vesicle budding	0.483259	2	Arfgap3/Myo18a
GO:0048668	collateral sprouting	0.483259	2	Crabp2/Omg
GO:0050892	intestinal absorption	0.483259	2	Ezr/Vil1
GO:0055075	potassium ion homeostasis	0.483259	2	Atp1a3/Kcnma1
GO:0060706	cell differentiation involved in embryonic placenta development	0.483259	2	Akt1/Snai1
GO:0060713	labyrinthine layer morphogenesis	0.483259	2	Bmp7/Wnt7b
GO:0090224	regulation of spindle organization	0.483259	2	Bora/Chmp4b
GO:0090313	regulation of protein targeting to membrane	0.483259	2	Cdk5r1/Mtcl1
GO:0099174	regulation of presynapse organization	0.483259	2	Farp1/Lrrc4b
GO:0099560	synaptic membrane adhesion	0.483259	2	Igsf9b/Lrrc4b
GO:1903792	negative regulation of anion transport	0.483259	2	Akt1/Prkg2
GO:1904861	excitatory synapse assembly	0.483259	2	Lrrc4b/Shank2
GO:1905314	semi-lunar valve development	0.483259	2	Nfatc1/Notch1
GO:0019953	sexual reproduction	0.483452	33	Abhd2/Acsbg2/Akt1/Aldoa/Amh/Catsperz/Cep131/Chtf18/Ctcfl/Ctnnb1/Dmc1/Dnmt3a/Drd5/Gamt/Grb14/Herpud2/Htt/Katnal1/Mertk/Ncoa2/Nectin2/Notch1/Pacrg/Plb1/Poc1a/Rps6ka2/Six5/Spesp1/Spink13/Syt6/Tssk2/Zbtb16/Zmiz1
GO:0062012	regulation of small molecule metabolic process	0.484394	15	Abcd2/Akt1/Egf/Fgfr4/Gfpt1/Kcnma1/Me1/Midn/Ncoa2/Ncor2/Nr4a3/Phlda2/Snai1/Srebf1/Zbtb20
GO:0051101	regulation of DNA binding	0.48502	7	Ctnnb1/Egf/Ercc4/Hjurp/Hspa4/Id4/Jun
GO:0001525	angiogenesis	0.485428	25	Adam8/Adgrb1/Akt1/Angpt4/Anpep/Bcas3/Becn1/Col18a1/Ctnnb1/Cxcl17/Dab2ip/Egf/Epo/Fgfr4/Ghrl/Hspg2/Jun/Notch1/Pik3r6/Ptk2/Ptprm/Ramp1/Rxra/Sulf1/Wnt7b
GO:0051222	positive regulation of protein transport	0.485593	18	Adam9/Bcas3/Blk/Carmil2/Casr/Cdk5r1/Cep131/Crtam/Ezr/Ghrl/Lrp2/Mtcl1/Myo18a/Nadk/Sox4/Trpv4/Wipf1/Xpo4
GO:0001892	embryonic placenta development	0.487874	6	Akt1/Bmp7/Bptf/Phlda2/Snai1/Wnt7b
GO:0017015	regulation of transforming growth factor beta receptor signaling pathway	0.487874	6	Cav2/Chst11/Dnm2/Fam89b/Ldlrad4/Pin1
GO:0034250	positive regulation of cellular amide metabolic process	0.487874	6	Eif2b5/Larp4/Mrps27/Rxra/Samd4/Sox4
GO:0046620	regulation of organ growth	0.487874	6	Akt1/Cacna1c/Notch1/Pin1/Ptk2/Sav1
GO:0007276	gamete generation	0.489538	26	Abhd2/Acsbg2/Akt1/Amh/Catsperz/Cep131/Chtf18/Ctcfl/Ctnnb1/Dmc1/Dnmt3a/Gamt/Grb14/Herpud2/Htt/Katnal1/Mertk/Nectin2/Notch1/Pacrg/Poc1a/Rps6ka2/Six5/Tssk2/Zbtb16/Zmiz1
GO:0016053	organic acid biosynthetic process	0.489779	16	Abcd2/Abhd2/Aldoa/Cbs/Ccnd3/Dhtkd1/Egf/Fads3/Fgfr4/Gamt/Ggt5/Htt/Mthfd1l/Sephs1/Srebf1/Zbtb20
GO:0050663	cytokine secretion	0.490096	9	Card11/Carmil2/Crtam/Ezr/Ghrl/Notch1/Tlr5/Tlr9/Trpv4
GO:0051224	negative regulation of protein transport	0.490096	9	Ezr/Ghrl/Hadh/Midn/Oit1/Pim3/Ptpn11/Rhbdf1/Srebf1
GO:0001938	positive regulation of endothelial cell proliferation	0.491134	5	Akt1/Cav2/Fgfr3/Ghrl/Jun
GO:0006333	chromatin assembly or disassembly	0.491134	5	H2afy/Hjurp/Ipo4/Shprh/Smarcc1
GO:0035305	negative regulation of dephosphorylation	0.491134	5	Elfn1/Epm2a/Farp1/Hpn/Ppp1r27
GO:1901136	carbohydrate derivative catabolic process	0.491134	5	Adamts12/Dctpp1/Fbxo6/Mgat1/Neu1
GO:0002757	immune response-activating signal transduction	0.491293	12	Blk/Carmil2/Cmtm3/Dab2ip/Eif2b5/Ezr/Malt1/Nectin2/Nr4a3/Pawr/Tlr5/Tlr9
GO:0071248	cellular response to metal ion	0.493043	8	Akt1/Grin2a/Jun/Mylk/Rasa4/Rasgrp2/Syt13/Syt6
GO:0031647	regulation of protein stability	0.493943	11	Apbb2/Hip1/Hip1r/Htt/Pin1/Sav1/Sox4/Srebf1/Stx12/Stxbp4/Zfp207
GO:0006821	chloride transport	0.494981	4	Casr/Pcyox1/Prkg2/Ttyh1
GO:0021675	nerve development	0.494981	4	Ctnnb1/Fgfr3/Plxna4/Sulf1
GO:0048747	muscle fiber development	0.494981	4	Cav2/Flnc/Myo18b/Myom3
GO:0070227	lymphocyte apoptotic process	0.494981	4	Adam8/Akt1/Dock8/Fnip1
GO:0098876	vesicle-mediated transport to the plasma membrane	0.494981	4	Dnm2/Grip1/Nsf/Scrib
GO:0031346	positive regulation of cell projection organization	0.495225	23	Bcas3/Bmp7/Carmil2/Crabp2/Creb3l2/Cux1/Dab2ip/Dnm2/Dscam/Epo/Grip1/Hap1/Htt/Kctd17/Limk1/Neu1/Ntn1/Plxna4/Plxnc1/Rapgef2/Shank2/Ube2v2/Vil1
GO:0010720	positive regulation of cell development	0.495523	32	Bmp7/Casp6/Cldn5/Crabp2/Creb3l2/Ctnnb1/Cux1/Dab2ip/Dct/Dnm2/Dock1/Dscam/Epo/Grip1/Hap1/Il6st/Limk1/Lims1/Lrp2/Man2a1/Neu1/Notch1/Ntn1/Pin1/Plxna4/Plxnc1/Ptk2/Rapgef2/Shank2/Tenm4/Tgif1/Ube2v2
GO:0043624	cellular protein complex disassembly	0.49635	7	Add2/Capg/Carmil2/Mical1/Nckap5/Trpv4/Vil1
GO:0019221	cytokine-mediated signaling pathway	0.497057	13	Akt1/Card14/Cxcl17/Epo/Il6st/Irgm1/Lims1/Oas2/Otop1/Rffl/Rps6ka5/Spata2/Traf2
GO:0034599	cellular response to oxidative stress	0.497057	13	Agap3/Akt1/Brf2/Ctnnb1/Erp27/Jun/Mcl1/Nr4a3/Pawr/Ppargc1b/Tldc1/Traf2/Wnt16
GO:0009314	response to radiation	0.499546	18	1700007K13Rik/Agap3/Akt1/Atp1a3/Cacna1c/Drd5/Ercc4/Fbxl21/Ghrl/Grin2a/Hrh1/Htt/Ints7/Jun/Lrp2/Map3k4/Nsmce3/Rcvrn
GO:0018205	peptidyl-lysine modification	0.499687	15	Ctcfl/Ctnnb1/H2afy/Jade1/Kat14/Kdm4b/Lipt2/Loxl4/Nelfa/Rps6ka5/Senp1/Setd4/Sox4/Tet2/Traf7
GO:0006900	vesicle budding from membrane	0.499744	3	Arfgap3/Dnm2/Myo18a
GO:0010823	negative regulation of mitochondrion organization	0.499744	3	Akt1/Clec16a/Usp30
GO:0032729	positive regulation of interferon-gamma production	0.499744	3	Carmil2/Tlr9/Zfpm1
GO:0035176	social behavior	0.499744	3	Cntnap2/Htt/Shank2
GO:0042108	positive regulation of cytokine biosynthetic process	0.499744	3	Card11/Tlr9/Zfpm1
GO:0043666	regulation of phosphoprotein phosphatase activity	0.499744	3	Htt/Pawr/Ppp6r3
GO:0050922	negative regulation of chemotaxis	0.499744	3	Notch1/Slamf8/St6gal1
GO:0051703	intraspecies interaction between organisms	0.499744	3	Cntnap2/Htt/Shank2
GO:0051931	regulation of sensory perception	0.499744	3	Acpp/Grin2a/Slc9a1
GO:2001222	regulation of neuron migration	0.499744	3	Camk2a/Dab2ip/Rapgef2
GO:0048489	synaptic vesicle transport	0.500009	9	Camk2a/Ctnnb1/Dnm2/Grm4/Ppfia2/Scrib/Stx11/Syt13/Syt6
GO:0097480	establishment of synaptic vesicle localization	0.500009	9	Camk2a/Ctnnb1/Dnm2/Grm4/Ppfia2/Scrib/Stx11/Syt13/Syt6
GO:0140013	meiotic nuclear division	0.500143	6	Catsperz/Chtf18/Dmc1/Eme2/Ercc4/Rps6ka2
GO:0044242	cellular lipid catabolic process	0.503562	8	Abcd2/Abhd2/Acsbg2/Akt1/Etfa/Hadh/Hsd17b4/Neu1
GO:0045619	regulation of lymphocyte differentiation	0.503562	8	Adam8/Card11/Carmil2/Malt1/Pik3r6/Tlr9/Zbtb16/Zmiz1
GO:0032504	multicellular organism reproduction	0.504158	33	Abhd2/Acsbg2/Akt1/Amh/Catsperz/Cbs/Cep131/Chtf18/Ctcfl/Ctnnb1/Dmc1/Dnmt3a/Drd5/Gamt/Ghrl/Grb14/Herpud2/Htt/Katnal1/Mertk/Ncoa2/Nectin2/Notch1/Pacrg/Poc1a/Ptpn11/Rps6ka2/Rxra/Six5/Spesp1/Tssk2/Zbtb16/Zmiz1
GO:0044770	cell cycle phase transition	0.504554	16	Camk2a/Ccnd3/Cdk5rap2/Chmp4b/H2afy/Id4/Jade1/Kat14/Nek6/Nfatc1/Rad51b/Six3/Sox4/Stxbp4/Ush1c/Zfp207
GO:0043467	regulation of generation of precursor metabolites and energy	0.504624	5	Akt1/Gfpt1/Phlda2/Trpv4/Zbtb20
GO:0072080	nephron tubule development	0.504624	5	Ctnnb1/Kif26b/Mtss1/Notch1/Wnt7b
GO:0097581	lamellipodium organization	0.504624	5	Arhgef4/Carmil2/Dnm2/Mtss1l/Vil1
GO:0002707	negative regulation of lymphocyte mediated immunity	0.506086	2	Tap2/Thoc1
GO:0003413	chondrocyte differentiation involved in endochondral bone morphogenesis	0.506086	2	Matn2/Poc1a
GO:0007080	mitotic metaphase plate congression	0.506086	2	Becn1/Chmp4b
GO:0016925	protein sumoylation	0.506086	2	Ctnnb1/Traf7
GO:0032506	cytokinetic process	0.506086	2	Chmp4b/Rtkn
GO:0033028	myeloid cell apoptotic process	0.506086	2	Epo/St6gal1
GO:0033344	cholesterol efflux	0.506086	2	Egf/Stx12
GO:0035774	positive regulation of insulin secretion involved in cellular response to glucose stimulus	0.506086	2	Ghrl/Nadk
GO:0042311	vasodilation	0.506086	2	Casr/Kcnma1
GO:0045684	positive regulation of epidermis development	0.506086	2	H2afy/Notch1
GO:0045910	negative regulation of DNA recombination	0.506086	2	Rmi2/Thoc1
GO:0046326	positive regulation of glucose import	0.506086	2	Akt1/Ptpn11
GO:0070232	regulation of T cell apoptotic process	0.506086	2	Adam8/Dock8
GO:0070306	lens fiber cell differentiation	0.506086	2	Fgfr3/Six3
GO:0071514	genetic imprinting	0.506086	2	Ctcfl/Dnmt3a
GO:0072599	establishment of protein localization to endoplasmic reticulum	0.506086	2	Chmp4b/Srp14
GO:0090312	positive regulation of protein deacetylation	0.506086	2	Ncor2/Srebf1
GO:0098751	bone cell development	0.506086	2	Ptpn11/Zfpm1
GO:1902175	regulation of oxidative stress-induced intrinsic apoptotic signaling pathway	0.506086	2	Erp27/Mcl1
GO:1905476	negative regulation of protein localization to membrane	0.506086	2	Fzd9/Ppp2r5a
GO:2000142	regulation of DNA-templated transcription, initiation	0.506086	2	Ctnnb1/Jun
GO:2000171	negative regulation of dendrite development	0.506086	2	Asap1/Rapgef2
GO:2000311	regulation of AMPA receptor activity	0.506086	2	Cacng2/Shank2
GO:2000404	regulation of T cell migration	0.506086	2	Adam8/Dock8
GO:2001025	positive regulation of response to drug	0.506086	2	Ghrl/Pawr
GO:0016358	dendrite development	0.507298	15	Asap1/Bmp7/Camk2a/Cdk5r1/Cux1/Dab2ip/Dclk1/Dscam/Farp1/Ghrl/Grip1/Matn2/Rapgef2/Sdk1/Shank2
GO:0071322	cellular response to carbohydrate stimulus	0.507602	7	Ghrl/Nadk/Pim3/Rps6ka2/Sox4/Stxbp4/Zbtb20
GO:0043903	regulation of symbiosis, encompassing mutualism through parasitism	0.509868	9	Cav2/Chmp4b/Hpn/Jun/Mvb12b/Nectin2/Notch1/Nr5a2/Trim8
GO:0002088	lens development in camera-type eye	0.510152	4	Ctnnb1/Fgfr3/Six3/Six5
GO:0009116	nucleoside metabolic process	0.510152	4	Acpp/Gamt/Icmt/Nme7
GO:0031960	response to corticosteroid	0.510152	4	Adam9/Kcnma1/Rxra/Sstr5
GO:0032963	collagen metabolic process	0.510152	4	Col1a1/Fgfr3/Pepd/Rcn3
GO:0048146	positive regulation of fibroblast proliferation	0.510152	4	Egf/Jun/Tgif1/Zmiz1
GO:0061035	regulation of cartilage development	0.510152	4	Adamts12/Ctnnb1/Rflna/Zbtb16
GO:1904894	positive regulation of STAT cascade	0.510152	4	Epo/Fgfr3/Il6st/Notch1
GO:0032273	positive regulation of protein polymerization	0.512309	6	Carmil2/Cdk5rap2/Hip1r/Map3k1/Vil1/Wipf1
GO:0061025	membrane fusion	0.512309	6	Adam8/Cav2/Nectin2/Spesp1/Stx11/Stx12
GO:1903844	regulation of cellular response to transforming growth factor beta stimulus	0.512309	6	Cav2/Chst11/Dnm2/Fam89b/Ldlrad4/Pin1
GO:0016072	rRNA metabolic process	0.514013	8	H2afy/Ippk/Nvl/Rpl7a/Rps15/Rps21/Rrp1/Srfbp1
GO:0000722	telomere maintenance via recombination	0.514588	1	Ercc4
GO:0001675	acrosome assembly	0.514588	1	Nectin2
GO:0001973	adenosine receptor signaling pathway	0.514588	1	Acpp
GO:0002024	diet induced thermogenesis	0.514588	1	Trpv4
GO:0002031	G protein-coupled receptor internalization	0.514588	1	Dnm2
GO:0002070	epithelial cell maturation	0.514588	1	Six3
GO:0002251	organ or tissue specific immune response	0.514588	1	Ifnl2
GO:0002385	mucosal immune response	0.514588	1	Ifnl2
GO:0002407	dendritic cell chemotaxis	0.514588	1	Slamf8
GO:0003334	keratinocyte development	0.514588	1	Palld
GO:0006379	mRNA cleavage	0.514588	1	Cpsf4l
GO:0006474	N-terminal protein amino acid acetylation	0.514588	1	Sox4
GO:0006607	NLS-bearing protein import into nucleus	0.514588	1	Ipo4
GO:0006620	posttranslational protein targeting to endoplasmic reticulum membrane	0.514588	1	Chmp4b
GO:0006691	leukotriene metabolic process	0.514588	1	Ggt5
GO:0006750	glutathione biosynthetic process	0.514588	1	Ggt5
GO:0007191	adenylate cyclase-activating dopamine receptor signaling pathway	0.514588	1	Drd5
GO:0007351	tripartite regional subdivision	0.514588	1	Tbx3
GO:0008212	mineralocorticoid metabolic process	0.514588	1	Kcnma1
GO:0008535	respiratory chain complex IV assembly	0.514588	1	Bcs1l
GO:0008595	anterior/posterior axis specification, embryo	0.514588	1	Tbx3
GO:0009595	detection of biotic stimulus	0.514588	1	Crtam
GO:0009950	dorsal/ventral axis specification	0.514588	1	Ctnnb1
GO:0010457	centriole-centriole cohesion	0.514588	1	Ctnnb1
GO:0010523	negative regulation of calcium ion transport into cytosol	0.514588	1	Epo
GO:0010832	negative regulation of myotube differentiation	0.514588	1	Notch1
GO:0010884	positive regulation of lipid storage	0.514588	1	Osbpl11
GO:0014052	regulation of gamma-aminobutyric acid secretion	0.514588	1	Slc6a1
GO:0014824	artery smooth muscle contraction	0.514588	1	Cacna1g
GO:0014841	skeletal muscle satellite cell proliferation	0.514588	1	Six5
GO:0015682	ferric iron transport	0.514588	1	Dnm2
GO:0018196	peptidyl-asparagine modification	0.514588	1	St6gal1
GO:0019896	axonal transport of mitochondrion	0.514588	1	Hap1
GO:0021534	cell proliferation in hindbrain	0.514588	1	Egf
GO:0021924	cell proliferation in external granule layer	0.514588	1	Egf
GO:0021930	cerebellar granule cell precursor proliferation	0.514588	1	Egf
GO:0022403	cell cycle phase	0.514588	1	Nfatc1
GO:0031571	mitotic G1 DNA damage checkpoint	0.514588	1	Sox4
GO:0032305	positive regulation of icosanoid secretion	0.514588	1	Map2k6
GO:0032341	aldosterone metabolic process	0.514588	1	Kcnma1
GO:0032486	Rap protein signal transduction	0.514588	1	Rapgef2
GO:0032688	negative regulation of interferon-beta production	0.514588	1	Relb
GO:0032717	negative regulation of interleukin-8 production	0.514588	1	Tlr9
GO:0032986	protein-DNA complex disassembly	0.514588	1	Smarcc1
[truncated: 2,326 more rows]

## Sheet: Striatum PSWTvsCtrlWTHyper 
Dataset 2: Hyper DhMR-associated gene ontologies
Striatum
PS WT vs Control WT
GO ID	Description	P-value	# of genes	Gene Symbol
GO:0099536	synaptic signaling	3.12184e-09	76	Ntng1/Tshz3/Cdh8/Cyfip1/Ncs1/Sipa1l1/Hrh1/Nedd4/Syt1/Lrfn2/Ghsr/Chrm3/Ror2/Mir145a/Epha4/Mef2c/Anks1b/Kdr/Syt10/Edn3/Nptn/Nos1/Gabrg3/Kras/Unc13b/Ppp3ca/Slc6a1/Stau2/Serpine2/Rims1/Slitrk5/Dlgap1/Vdac3/Slc7a11/Nr3c2/Snap25/Grik1/Ptprn2/Clstn2/Dagla/Ngf/Kcnh1/Cdh11/Mir551b/Nrxn3/Grik4/Cplx4/Dcc/Dnm1/Arid1b/Cacna1b/Lypd1/Pnoc/Ctnnb1/Lama2/Sv2c/Ntrk2/Adrb1/Kcnma1/Unc13c/Gdnf/Grin2b/Etv5/Cacna1c/Mir1…
GO:0099537	trans-synaptic signaling	4.17146e-09	75	Ntng1/Tshz3/Cdh8/Cyfip1/Ncs1/Sipa1l1/Hrh1/Nedd4/Syt1/Lrfn2/Ghsr/Chrm3/Ror2/Mir145a/Epha4/Mef2c/Kdr/Syt10/Edn3/Nptn/Nos1/Gabrg3/Kras/Unc13b/Ppp3ca/Slc6a1/Stau2/Serpine2/Rims1/Slitrk5/Dlgap1/Vdac3/Slc7a11/Nr3c2/Snap25/Grik1/Ptprn2/Clstn2/Dagla/Ngf/Kcnh1/Cdh11/Mir551b/Nrxn3/Grik4/Cplx4/Dcc/Dnm1/Arid1b/Cacna1b/Lypd1/Pnoc/Ctnnb1/Lama2/Sv2c/Ntrk2/Adrb1/Kcnma1/Unc13c/Gdnf/Grin2b/Etv5/Cacna1c/Mir153/Nlgn…
GO:0007268	chemical synaptic transmission	1.07483e-08	73	Ntng1/Tshz3/Cdh8/Cyfip1/Ncs1/Sipa1l1/Hrh1/Nedd4/Syt1/Lrfn2/Ghsr/Chrm3/Ror2/Mir145a/Epha4/Mef2c/Kdr/Syt10/Edn3/Nptn/Nos1/Gabrg3/Kras/Unc13b/Ppp3ca/Slc6a1/Stau2/Serpine2/Rims1/Slitrk5/Dlgap1/Vdac3/Slc7a11/Nr3c2/Snap25/Grik1/Ptprn2/Clstn2/Ngf/Kcnh1/Cdh11/Mir551b/Nrxn3/Grik4/Cplx4/Dcc/Dnm1/Arid1b/Cacna1b/Lypd1/Pnoc/Ctnnb1/Lama2/Sv2c/Ntrk2/Adrb1/Kcnma1/Unc13c/Gdnf/Grin2b/Etv5/Cacna1c/Mir153/Nlgn2/Kalr…
GO:0098916	anterograde trans-synaptic signaling	1.07483e-08	73	Ntng1/Tshz3/Cdh8/Cyfip1/Ncs1/Sipa1l1/Hrh1/Nedd4/Syt1/Lrfn2/Ghsr/Chrm3/Ror2/Mir145a/Epha4/Mef2c/Kdr/Syt10/Edn3/Nptn/Nos1/Gabrg3/Kras/Unc13b/Ppp3ca/Slc6a1/Stau2/Serpine2/Rims1/Slitrk5/Dlgap1/Vdac3/Slc7a11/Nr3c2/Snap25/Grik1/Ptprn2/Clstn2/Ngf/Kcnh1/Cdh11/Mir551b/Nrxn3/Grik4/Cplx4/Dcc/Dnm1/Arid1b/Cacna1b/Lypd1/Pnoc/Ctnnb1/Lama2/Sv2c/Ntrk2/Adrb1/Kcnma1/Unc13c/Gdnf/Grin2b/Etv5/Cacna1c/Mir153/Nlgn2/Kalr…
GO:0099177	regulation of trans-synaptic signaling	3.41136e-07	58	Ntng1/Tshz3/Cyfip1/Ncs1/Sipa1l1/Hrh1/Nedd4/Syt1/Lrfn2/Ghsr/Ror2/Mir145a/Epha4/Mef2c/Kdr/Edn3/Nptn/Nos1/Kras/Unc13b/Ppp3ca/Slc6a1/Stau2/Serpine2/Rims1/Slc7a11/Nr3c2/Snap25/Grik1/Clstn2/Ngf/Kcnh1/Cdh11/Mir551b/Nrxn3/Grik4/Cplx4/Dcc/Dnm1/Cacna1b/Lama2/Ntrk2/Adrb1/Unc13c/Gdnf/Grin2b/Mir153/Nlgn2/Kalrn/Erbb4/Lrrc4/Rapgef2/Prkar1b/Grk2/Lrrc4c/Prkce/Ywhag/Fabp5
GO:0050804	modulation of chemical synaptic transmission	7.09492e-07	57	Ntng1/Tshz3/Cyfip1/Ncs1/Sipa1l1/Hrh1/Nedd4/Syt1/Lrfn2/Ghsr/Ror2/Mir145a/Epha4/Mef2c/Kdr/Edn3/Nptn/Nos1/Kras/Unc13b/Ppp3ca/Slc6a1/Stau2/Serpine2/Rims1/Slc7a11/Nr3c2/Snap25/Grik1/Clstn2/Ngf/Kcnh1/Cdh11/Mir551b/Nrxn3/Grik4/Cplx4/Dcc/Dnm1/Cacna1b/Lama2/Ntrk2/Adrb1/Unc13c/Gdnf/Grin2b/Mir153/Nlgn2/Kalrn/Erbb4/Lrrc4/Rapgef2/Prkar1b/Grk2/Lrrc4c/Prkce/Ywhag
GO:0048812	neuron projection morphogenesis	3.66642e-06	65	Ntng1/Kif13b/Efnb2/Adgrb3/Cyfip1/Sipa1l1/Nedd4/Syt1/Ank3/Grip1/Dst/Epb41l3/Mef2a/Robo2/Epha4/Sh3gl2/Auts2/Numbl/Plxna2/Slit3/Kdr/Nptn/Rere/Iqgap1/Foxd1/Bcl11a/Ppp3ca/Dcdc2a/Smad4/Stau2/Cdh4/Fmn1/Rims1/Slitrk5/Wnt7b/Nkx2-9/Scn1b/Kirrel3/Celsr3/Ngf/Prtg/Cpne5/Arhgef28/Cdh11/Dcc/Ntrk3/Ctnnb1/Ntrk2/Sema6d/Gdnf/Foxp1/Caprin1/Bcl11b/Cntnap2/Robo1/Kalrn/Lmx1a/Lhx2/Map3k13/Nfib/Map4k4/Rapgef2/Pou4f3/Ext1…
GO:0120039	plasma membrane bounded cell projection morphogenesis	4.32032e-06	66	Ntng1/Kif13b/Pdpn/Efnb2/Adgrb3/Cyfip1/Sipa1l1/Nedd4/Syt1/Ank3/Grip1/Dst/Epb41l3/Mef2a/Robo2/Epha4/Sh3gl2/Auts2/Numbl/Plxna2/Slit3/Kdr/Nptn/Rere/Iqgap1/Foxd1/Bcl11a/Ppp3ca/Dcdc2a/Smad4/Stau2/Cdh4/Fmn1/Rims1/Slitrk5/Wnt7b/Nkx2-9/Scn1b/Kirrel3/Celsr3/Ngf/Prtg/Cpne5/Arhgef28/Cdh11/Dcc/Ntrk3/Ctnnb1/Ntrk2/Sema6d/Gdnf/Foxp1/Caprin1/Bcl11b/Cntnap2/Robo1/Kalrn/Lmx1a/Lhx2/Map3k13/Nfib/Map4k4/Rapgef2/Pou4f3…
GO:0048858	cell projection morphogenesis	4.97622e-06	66	Ntng1/Kif13b/Pdpn/Efnb2/Adgrb3/Cyfip1/Sipa1l1/Nedd4/Syt1/Ank3/Grip1/Dst/Epb41l3/Mef2a/Robo2/Epha4/Sh3gl2/Auts2/Numbl/Plxna2/Slit3/Kdr/Nptn/Rere/Iqgap1/Foxd1/Bcl11a/Ppp3ca/Dcdc2a/Smad4/Stau2/Cdh4/Fmn1/Rims1/Slitrk5/Wnt7b/Nkx2-9/Scn1b/Kirrel3/Celsr3/Ngf/Prtg/Cpne5/Arhgef28/Cdh11/Dcc/Ntrk3/Ctnnb1/Ntrk2/Sema6d/Gdnf/Foxp1/Caprin1/Bcl11b/Cntnap2/Robo1/Kalrn/Lmx1a/Lhx2/Map3k13/Nfib/Map4k4/Rapgef2/Pou4f3…
GO:0098742	cell-cell adhesion via plasma-membrane adhesion molecules	5.58205e-06	26	Ntng1/Cdh8/Adgrl3/Tgfbr2/Cdh13/Tenm3/Robo2/Pcdh15/Cd6/Vcam1/Nptn/Tenm4/Fgfrl1/Cdh4/Magi2/Clstn2/Kirrel3/Celsr3/Prtg/Cdh11/Cxadr/Atp2c1/Sdk1/Robo1/Lrrc4/Lrrc4c
GO:0032990	cell part morphogenesis	9.25097e-06	66	Ntng1/Kif13b/Pdpn/Efnb2/Adgrb3/Cyfip1/Sipa1l1/Nedd4/Syt1/Ank3/Grip1/Dst/Epb41l3/Mef2a/Robo2/Epha4/Sh3gl2/Auts2/Numbl/Plxna2/Slit3/Kdr/Nptn/Rere/Iqgap1/Foxd1/Bcl11a/Ppp3ca/Dcdc2a/Smad4/Stau2/Cdh4/Fmn1/Rims1/Slitrk5/Wnt7b/Nkx2-9/Scn1b/Kirrel3/Celsr3/Ngf/Prtg/Cpne5/Arhgef28/Cdh11/Dcc/Ntrk3/Ctnnb1/Ntrk2/Sema6d/Gdnf/Foxp1/Caprin1/Bcl11b/Cntnap2/Robo1/Kalrn/Lmx1a/Lhx2/Map3k13/Nfib/Map4k4/Rapgef2/Pou4f3…
GO:0050808	synapse organization	2.17821e-05	45	Ntng1/Lrrtm4/Efnb2/Cdh8/Adgrb3/Cyfip1/Sipa1l1/Nedd4/Lrfn2/Ank3/Ghsr/Adgrl3/Nfia/Ywhaz/Epha4/Abhd17b/Col4a1/Mef2c/Nptn/Unc13b/Stau2/Slitrk5/Wnt7b/Magi2/Slc7a11/Clstn2/Kirrel3/Utrn/Nrg2/Nrxn3/Ntrk3/Ctnnb1/Ntrk2/Unc13c/Gdnf/Grin2b/Caprin1/Etv5/Sdk1/Nlgn2/Kalrn/Lmx1a/Erbb4/Lrrc4/Lrrc4c
GO:0007610	behavior	3.47229e-05	57	Adgrb3/Hrh1/Ahi1/Ghsr/Adgrl3/Dach1/Pja2/Epha4/Auts2/Mapk10/Pcdh15/Scn9a/Mef2c/Runx1/Nos1/Kras/Slc6a1/Lamb1/Dcdc2a/Fbxw7as1/Serpine2/Slitrk5/Vdac3/Slc7a11/Snap25/Grik1/Kirrel3/Ncoa2/Zfhx3/Ngf/Agtpbp1/Naglu/Cln6/Dnm1/Cacna1b/Lypd1/Ntrk2/Negr1/Adrb1/Kcnma1/Foxp1/Grin2b/Cntnap2/Etv5/Sdk1/Cacna1c/Nlgn2/Thrb/Kalrn/Lmx1a/Npas3/Id2/Prkar1b/Six3/Prkce/Rmi1/Fign
GO:0048667	cell morphogenesis involved in neuron differentiation	7.64267e-05	57	Ntng1/Kif13b/Efnb2/Adgrb3/Cyfip1/Sipa1l1/Nedd4/Ank3/Dst/Mef2a/Robo2/Epha4/Auts2/Pcdh15/Numbl/Plxna2/Mef2c/Slit3/Nptn/Rere/Foxd1/Bcl11a/Ppp3ca/Dcdc2a/Smad4/Stau2/Cdh4/Fmn1/Slitrk5/Wnt7b/Nkx2-9/Scn1b/Celsr3/Ngf/Prtg/Arhgef28/Cdh11/Dcc/Ntrk3/Myo3b/Ntrk2/Sema6d/Gdnf/Foxp1/Caprin1/Bcl11b/Robo1/Kalrn/Lmx1a/Lhx2/Map3k13/Id2/Nfib/Rapgef2/Pou4f3/Ext1/Lrrc4c
GO:0023061	signal release	8.36839e-05	45	Anxa1/Stxbp3/Hmga2/Ncs1/Syt1/Cyp19a1/Nell2/Ghsr/Ywhaz/Sox4/Kcnj11/Mef2c/Pparg/Syt10/Edn3/Irs1/Runx1/Foxd1/Nos1/Unc13b/Ppp3ca/Smad4/Rims1/Nr3c2/Snap25/Pde3b/Ptprn2/Hadh/Ngf/Kcnh1/Nrxn3/Cplx4/Ucp2/Nadk/Inhba/Cacna1b/Ntrk2/Unc13c/Slc30a8/Cacna1c/Nlgn2/Kalrn/Map4k4/Prkce/Irs2
GO:0098609	cell-cell adhesion	0.000133695	57	Ntng1/Anxa1/Stxbp3/Pdpn/Efnb2/Cdh8/Sox9/Ank3/Kif26b/Adgrl3/Megf10/Tgfbr2/Cdh13/Tenm3/Robo2/Pcdh15/Cd6/Fer/Vcam1/Cited2/Nptn/Tenm4/Runx1/Card11/Fgfrl1/Cd83/Lamb1/Cdh4/Serpine2/Cd9/Wnt7b/Magi2/Icos/Slc7a11/Ets1/Clstn2/Kirrel3/Pla2g2d/Celsr3/Prtg/Cdh11/Podxl/Cxadr/Ptpru/Ctnnb1/Negr1/Pard3/Nck2/Atp2c1/Sdk1/Nlgn2/Robo1/Pag1/Lrrc4/Rap2b/Kirrel/Lrrc4c
GO:0060993	kidney morphogenesis	0.000156855	15	Tshz3/Sox9/Kif26b/Ahi1/Adamts16/Sox4/Pbx1/Foxd1/Lama5/Smad4/Fmn1/Wnt7b/Ctnnb1/Gdnf/Fras1
GO:0042391	regulation of membrane potential	0.00024517	37	Stoml2/Ank3/Akap6/Ndufc2/Rack1/Atp1b1/Got1/Scn9a/Kcnj11/Mef2c/Kdr/Gabrg3/Ndufs1/Unc13b/Ppp3ca/Rims1/Scn1b/Nr3c2/Grik1/Kcnmb4/Kcnh1/Cxadr/Kcne4/Ucp2/Ntrk3/Ntrk2/Adrb1/Kcnma1/Foxp1/Grin2b/Cacna2d1/Cacna1c/Nlgn2/Kcnq2/Rgs7/Grk2/Prkce
GO:0007626	locomotory behavior	0.000417235	25	Ghsr/Adgrl3/Epha4/Mapk10/Pcdh15/Snap25/Ncoa2/Zfhx3/Ngf/Agtpbp1/Naglu/Cln6/Dnm1/Cacna1b/Negr1/Kcnma1/Etv5/Cacna1c/Nlgn2/Kalrn/Lmx1a/Npas3/Id2/Prkce/Fign
GO:0021772	olfactory bulb development	0.00043025	9	Sall3/Robo2/Agtpbp1/Pcnt/Robo1/Lhx2/Erbb4/Id2/Ext1
GO:0050803	regulation of synapse structure or activity	0.000498079	29	Lrrtm4/Cdh8/Adgrb3/Cyfip1/Sipa1l1/Nedd4/Lrfn2/Cyp19a1/Ghsr/Adgrl3/Ywhaz/Epha4/Abhd17b/Mef2c/Stau2/Slitrk5/Magi2/Slc7a11/Clstn2/Nrg2/Dnm1/Ntrk3/Ntrk2/Grin2b/Caprin1/Etv5/Nlgn2/Kalrn/Lrrc4
GO:0061333	renal tubule morphogenesis	0.000501095	13	Sox9/Kif26b/Ahi1/Adamts16/Pbx1/Col4a1/Mef2c/Foxd1/Lama5/Smad4/Fmn1/Ctnnb1/Gdnf
GO:0090278	negative regulation of peptide hormone secretion	0.000526212	11	Ghsr/Kcnj11/Pparg/Irs1/Nos1/Ppp3ca/Pde3b/Hadh/Ucp2/Kalrn/Map4k4
GO:0003338	metanephros morphogenesis	0.000538865	7	Sox9/Kif26b/Fmn1/Wnt7b/Ctnnb1/Gdnf/Fras1
GO:2000027	regulation of animal organ morphogenesis	0.000542018	23	Esr1/Hmga2/Sox9/Ahi1/Ror2/Tgfbr2/Znrf3/Robo2/Rbpj/Vdr/Nkd1/Cited2/Srsf6/Smad4/Wnt7b/Celsr3/Runx2/Ctnnb1/Gdnf/Etv5/Robo1/Thrb/Nfib
GO:0046879	hormone secretion	0.000562182	31	Anxa1/Stxbp3/Hmga2/Cyp19a1/Nell2/Ghsr/Ywhaz/Sox4/Kcnj11/Pparg/Edn3/Irs1/Runx1/Foxd1/Nos1/Ppp3ca/Smad4/Snap25/Pde3b/Ptprn2/Hadh/Ucp2/Nadk/Inhba/Slc30a8/Cacna1c/Nlgn2/Kalrn/Map4k4/Prkce/Irs2
GO:0045475	locomotor rhythm	0.000600404	6	Mapk10/Ncoa2/Zfhx3/Naglu/Kcnma1/Id2
GO:0007156	homophilic cell adhesion via plasma membrane adhesion molecules	0.000641516	14	Cdh8/Cdh13/Tenm3/Robo2/Pcdh15/Nptn/Cdh4/Clstn2/Kirrel3/Celsr3/Prtg/Cdh11/Sdk1/Robo1
GO:0009914	hormone transport	0.000714478	31	Anxa1/Stxbp3/Hmga2/Cyp19a1/Nell2/Ghsr/Ywhaz/Sox4/Kcnj11/Pparg/Edn3/Irs1/Runx1/Foxd1/Nos1/Ppp3ca/Smad4/Snap25/Pde3b/Ptprn2/Hadh/Ucp2/Nadk/Inhba/Slc30a8/Cacna1c/Nlgn2/Kalrn/Map4k4/Prkce/Irs2
GO:0021988	olfactory lobe development	0.000714549	9	Sall3/Robo2/Agtpbp1/Pcnt/Robo1/Lhx2/Erbb4/Id2/Ext1
GO:0035637	multicellular organismal signaling	0.000734483	18	Itga2/Pln/Ank3/Ghsr/Mef2a/Scn9a/Pde4d/Tnni3k/Scn1b/Kcnmb4/Cxadr/Kcne4/Ntrk3/Ntrk2/Kcnma1/Cacna2d1/Cacna1c/Kcnq2
GO:0034762	regulation of transmembrane transport	0.000769017	42	Stxbp3/Esr1/Pln/Nedd4/Ank3/Ahi1/Akap6/Mef2a/Atp1b1/Wnk2/Scn9a/Kcnj11/Mef2c/Kcna6/Pde4d/Edn3/Rgs9/Irs1/Nos1/Kcng1/Scn1b/Ngf/Kcnh1/Kcne4/Dhrs7c/Cacna1b/Kcnip4/Adrb1/Kcnma1/Cacna2d3/Tmem37/Kcng3/Cacna2d1/Cacna1c/Nlgn2/Kcnq2/Rgs7/Erbb4/Grk2/Prkce/Irs2/Fabp5
GO:0007411	axon guidance	0.000805951	26	Efnb2/Cyfip1/Ank3/Robo2/Epha4/Plxna2/Slit3/Nptn/Foxd1/Smad4/Cdh4/Wnt7b/Scn1b/Celsr3/Prtg/Dcc/Sema6d/Gdnf/Foxp1/Bcl11b/Robo1/Lmx1a/Lhx2/Nfib/Pou4f3/Ext1
GO:0042330	taxis	0.000815719	44	Anxa1/Itga2/Efnb2/Cyfip1/Ccl17/Hrh1/Ank3/Cyp19a1/Pla2g7/Cdh13/Robo2/Epha4/Prex1/Plxna2/Fer/Vcam1/Slit3/Pde4d/Kdr/Edn3/Nptn/Foxd1/Smad4/Cdh4/Wnt7b/Scn1b/Celsr3/Prtg/Cxadr/Dcc/Ntrk3/Sema6d/Gdnf/Foxp1/Bcl11b/Cmtm8/Nlgn2/Robo1/Lmx1a/Lhx2/Id2/Nfib/Pou4f3/Ext1
GO:0007409	axonogenesis	0.000818082	43	Ntng1/Kif13b/Efnb2/Cyfip1/Sipa1l1/Ank3/Dst/Robo2/Epha4/Auts2/Numbl/Plxna2/Slit3/Nptn/Foxd1/Bcl11a/Smad4/Cdh4/Slitrk5/Wnt7b/Nkx2-9/Scn1b/Celsr3/Ngf/Prtg/Arhgef28/Cdh11/Dcc/Ntrk3/Ntrk2/Sema6d/Gdnf/Foxp1/Bcl11b/Robo1/Kalrn/Lmx1a/Lhx2/Map3k13/Nfib/Pou4f3/Ext1/Lrrc4c
GO:0097485	neuron projection guidance	0.000880276	26	Efnb2/Cyfip1/Ank3/Robo2/Epha4/Plxna2/Slit3/Nptn/Foxd1/Smad4/Cdh4/Wnt7b/Scn1b/Celsr3/Prtg/Dcc/Sema6d/Gdnf/Foxp1/Bcl11b/Robo1/Lmx1a/Lhx2/Nfib/Pou4f3/Ext1
GO:0008016	regulation of heart contraction	0.000884097	19	Pln/Akap6/Mef2a/Atp1b1/Pde4d/Edn3/Nos1/Tnni3k/Scn1b/Cxadr/Kcne4/Hdac4/Cacna1b/Adrb1/Cacna2d1/Cacna1c/Thrb/Pebp1/Grk2
GO:0060080	inhibitory postsynaptic potential	0.000886633	5	Unc13b/Rims1/Grik1/Adrb1/Nlgn2
GO:0032332	positive regulation of chondrocyte differentiation	0.000897709	6	Sox9/Anxa2/Sox5/Pkdcc/Runx2/Thrb
GO:0001655	urogenital system development	0.00100582	32	Upk3a/Anxa1/Tshz3/Esr1/Mpst/Efnb2/Sox9/Id4/Cyp19a1/Kif26b/Ahi1/Nfia/Adamts16/Robo2/Epha4/Sox4/Pbx1/Col4a1/Mef2c/Foxd1/Lama5/Smad4/Fmn1/Wnt7b/Psap/Kirrel3/Cenpf/Ctnnb1/Gdnf/Pcnt/Fras1/Id2
GO:0046676	negative regulation of insulin secretion	0.00113597	9	Ghsr/Kcnj11/Irs1/Nos1/Ppp3ca/Pde3b/Hadh/Ucp2/Map4k4
GO:0034109	homotypic cell-cell adhesion	0.00116707	10	Stxbp3/Pdpn/Ank3/Megf10/Serpine2/Cd9/Slc7a11/Cxadr/Ptpru/Rap2b
GO:0060412	ventricular septum morphogenesis	0.00116707	10	Tgfbr2/Robo2/Sox4/Rbpj/Slit3/Cited2/Fgfrl1/Smad4/Robo1/Id2
GO:0030324	lung development	0.00130137	22	Tshz3/Pdpn/Hmga2/Sox9/Sp3/Hs6st1/Tgfbr2/Rbpj/Kdr/Srsf6/Lama5/Kras/Pkdcc/Wnt7b/Nkx2-9/Slc7a11/Meg3/Mycn/Ctnnb1/Foxp1/Thrb/Nfib
GO:0061326	renal tubule development	0.0013378	14	Sox9/Kif26b/Ahi1/Adamts16/Pbx1/Col4a1/Mef2c/Foxd1/Lama5/Smad4/Fmn1/Wnt7b/Ctnnb1/Gdnf
GO:0003012	muscle system process	0.00134368	32	Itga2/Tshz3/Pln/Ghsr/Chrm3/Akap6/Pde9a/Mef2a/Atp1b1/Map2k6/Mef2c/Ryr3/Pde4d/Hsbp1/Edn3/Ireb2/Nos1/Ppp3ca/Smad4/Jarid2/Tnni3k/Scn1b/Kcne4/Hdac4/Myom2/Adrb1/Kcnma1/Gdnf/Foxp1/Cacna2d1/Cacna1c/Grk2
GO:0046883	regulation of hormone secretion	0.00134819	26	Anxa1/Hmga2/Cyp19a1/Nell2/Ghsr/Sox4/Kcnj11/Pparg/Edn3/Irs1/Runx1/Nos1/Ppp3ca/Smad4/Snap25/Pde3b/Hadh/Ucp2/Nadk/Inhba/Slc30a8/Nlgn2/Kalrn/Map4k4/Prkce/Irs2
GO:0010092	specification of animal organ identity	0.00138587	7	Robo2/Smarcd3/Mef2c/Rbpj/Ctnnb1/Gdnf/Robo1
GO:0007416	synapse assembly	0.00140558	20	Lrrtm4/Efnb2/Adgrb3/Sipa1l1/Ghsr/Adgrl3/Mef2c/Nptn/Stau2/Slitrk5/Magi2/Clstn2/Kirrel3/Nrg2/Nrxn3/Ntrk3/Ntrk2/Sdk1/Nlgn2/Erbb4
GO:0001656	metanephros development	0.00146848	12	Tshz3/Sox9/Kif26b/Robo2/Foxd1/Smad4/Fmn1/Wnt7b/Ctnnb1/Gdnf/Fras1/Id2
GO:0016358	dendrite development	0.00148438	28	Adgrb3/Cyfip1/Sipa1l1/Nedd4/Grip1/Mef2a/Epha4/Prex1/Numbl/Mef2c/Mapk6/Rere/Iqgap1/Bcl11a/Ppp3ca/Dcdc2a/Stau2/Fmn1/Slitrk5/Arid1b/Ntrk2/Nck2/Caprin1/Sdk1/Nlgn2/Robo1/Kalrn/Rapgef2
GO:0098660	inorganic ion transmembrane transport	0.00150165	46	Ank/Pln/Hrh1/Nedd4/Atp6v1g3/Stoml2/Ank3/Akap6/Mcoln2/Trpc7/Slc30a10/Atp1b1/Wnk2/Scn9a/Kcnj11/Kcna6/Ryr3/Pde4d/Edn3/Nos1/Gabrg3/Kcng1/Fam155a/Scn1b/Ngf/Kcnh1/Kcne4/Dhrs7c/Cacna1b/Kcnip4/Adrb1/Kcnma1/Cacna2d3/Tmem37/Atp2c1/Kcng3/Grin2b/Slc30a8/Cacna2d1/Micu1/Cacna1c/Kcnq2/Rgs7/Prkce/Atp2b1/Tmem38b
GO:0050806	positive regulation of synaptic transmission	0.0015021	25	Tshz3/Ncs1/Syt1/Ror2/Mir145a/Epha4/Nos1/Unc13b/Serpine2/Rims1/Snap25/Grik1/Clstn2/Mir551b/Cacna1b/Lama2/Ntrk2/Adrb1/Grin2b/Mir153/Nlgn2/Kalrn/Erbb4/Grk2/Prkce
GO:0031532	actin cytoskeleton reorganization	0.00152463	13	Anxa1/Gmfg/Sipa1l1/Auts2/Baiap2l1/Bcas3/Mkln1/Fer/Rhobtb1/Cxadr/Ntrk3/Ptpn1/Atp2c1
GO:0050807	regulation of synapse organization	0.0015382	27	Lrrtm4/Cdh8/Adgrb3/Cyfip1/Sipa1l1/Nedd4/Lrfn2/Ghsr/Adgrl3/Ywhaz/Epha4/Abhd17b/Mef2c/Stau2/Slitrk5/Magi2/Slc7a11/Clstn2/Nrg2/Ntrk3/Ntrk2/Grin2b/Caprin1/Etv5/Nlgn2/Kalrn/Lrrc4
GO:0030323	respiratory tube development	0.00156911	22	Tshz3/Pdpn/Hmga2/Sox9/Sp3/Hs6st1/Tgfbr2/Rbpj/Kdr/Srsf6/Lama5/Kras/Pkdcc/Wnt7b/Nkx2-9/Slc7a11/Meg3/Mycn/Ctnnb1/Foxp1/Thrb/Nfib
GO:0060420	regulation of heart growth	0.00160616	11	Akap6/Tgfbr2/Mef2c/Rbpj/Cited2/Dusp6/Jarid2/Cxadr/Adrb1/Foxp1/Erbb4
GO:0060038	cardiac muscle cell proliferation	0.00170735	10	Tgfbr2/Mef2c/Rbpj/Cited2/Tenm4/Jarid2/Cxadr/Ctnnb1/Foxp1/Erbb4
GO:0032330	regulation of chondrocyte differentiation	0.00173848	9	Sox9/Anxa2/Lnpk/Sox5/Pkdcc/Trps1/Runx2/Ctnnb1/Thrb
GO:0031346	positive regulation of cell projection organization	0.00180873	40	Itga2/Cyfip1/Syt1/Grip1/Ahi1/Tenm3/Enc1/Tmem30a/Robo2/Epha4/Auts2/Carmil1/Numbl/Bcas3/Plxna2/Mapk6/Iqgap1/Bcl11a/Stau2/Cdh4/Serpine2/Rims1/Magi2/Scn1b/Eef1a1/Ngf/Cpne5/Dcc/Hdac4/Wrap73/Ntrk3/Myo3b/Ntrk2/Negr1/Caprin1/Nlgn2/Robo1/Kalrn/Map3k13/Rapgef2
GO:0060914	heart formation	0.00181792	6	Robo2/Smarcd3/Mef2c/Rbpj/Ctnnb1/Robo1
GO:1902473	regulation of protein localization to synapse	0.00181792	6	Gpc6/Ghsr/Abhd17b/Magi2/Nlgn2/Kalrn
GO:0098662	inorganic cation transmembrane transport	0.00182541	44	Pln/Hrh1/Nedd4/Atp6v1g3/Stoml2/Ank3/Akap6/Mcoln2/Trpc7/Slc30a10/Atp1b1/Wnk2/Scn9a/Kcnj11/Kcna6/Ryr3/Pde4d/Edn3/Nos1/Kcng1/Fam155a/Scn1b/Ngf/Kcnh1/Kcne4/Dhrs7c/Cacna1b/Kcnip4/Adrb1/Kcnma1/Cacna2d3/Tmem37/Atp2c1/Kcng3/Grin2b/Slc30a8/Cacna2d1/Micu1/Cacna1c/Kcnq2/Rgs7/Prkce/Atp2b1/Tmem38b
GO:0010976	positive regulation of neuron projection development	0.00192419	33	Cyfip1/Syt1/Grip1/Ahi1/Tenm3/Enc1/Tmem30a/Robo2/Epha4/Numbl/Plxna2/Mapk6/Iqgap1/Bcl11a/Stau2/Cdh4/Serpine2/Rims1/Magi2/Scn1b/Eef1a1/Ngf/Cpne5/Dcc/Ntrk3/Ntrk2/Negr1/Caprin1/Nlgn2/Robo1/Kalrn/Map3k13/Rapgef2
GO:0072073	kidney epithelium development	0.00195448	17	Tshz3/Efnb2/Sox9/Kif26b/Ahi1/Adamts16/Robo2/Epha4/Pbx1/Mef2c/Foxd1/Lama5/Smad4/Fmn1/Wnt7b/Ctnnb1/Gdnf
GO:0072080	nephron tubule development	0.00202407	13	Sox9/Kif26b/Ahi1/Adamts16/Pbx1/Mef2c/Foxd1/Lama5/Smad4/Fmn1/Wnt7b/Ctnnb1/Gdnf
GO:0051588	regulation of neurotransmitter transport	0.00202431	18	Ncs1/Syt1/Mef2c/Edn3/Nos1/Unc13b/Slc6a1/Rims1/Nr3c2/Grik1/Ngf/Kcnh1/Nrxn3/Cplx4/Cacna1b/Ntrk2/Gdnf/Prkce
GO:0010720	positive regulation of cell development	0.00204278	51	Olfm4/Cyfip1/Syt1/Grip1/Ahi1/Akap6/Tenm3/Enc1/Tmem30a/Robo2/Epha4/Prex1/Carmil1/Numbl/Plxna2/Smarcd3/Mef2c/Pparg/Mapk6/Kdr/Tenm4/Iqgap1/Runx1/Bcl11a/Stau2/Cdh4/Serpine2/Rims1/Magi2/Scn1b/Eef1a1/Ngf/Rgs6/Cpne5/Dcc/Ntrk3/Ect2/Ctnnb1/Ntrk2/Negr1/Adrb1/Caprin1/Etv5/Nlgn2/Robo1/Kalrn/Lmx1a/Map3k13/Mmd/Id2/Rapgef2
GO:0060047	heart contraction	0.00208244	20	Pln/Akap6/Mef2a/Atp1b1/Map2k6/Pde4d/Edn3/Nos1/Tnni3k/Scn1b/Cxadr/Kcne4/Hdac4/Cacna1b/Adrb1/Cacna2d1/Cacna1c/Thrb/Pebp1/Grk2
GO:0003179	heart valve morphogenesis	0.00212329	9	Sox9/Tgfbr2/Robo2/Sox4/Mef2c/Slit3/Fgfrl1/Smad4/Robo1
GO:0021537	telencephalon development	0.00218013	26	Id4/Sun2/Sall3/Robo2/Numbl/Lamb1/Fbxw7as1/Slitrk5/Slc7a11/Kirrel3/Agtpbp1/Inhba/Ctnnb1/Ntrk2/Trappc9/Bcl11b/Pcnt/Robo1/Lmx1a/Lhx2/Erbb4/Pebp1/Id2/Nfib/Ext1/Six3
GO:0043269	regulation of ion transport	0.00225581	49	Pln/Nedd4/Syt1/Ank3/Akap6/Anxa2/Slc30a10/Atp1b1/Wnk2/Map2k6/Scn9a/Kcnj11/Mef2c/Vdr/Kcna6/Pde4d/Syt10/Edn3/Rgs9/Nos1/Kcng1/Slc6a1/Serpine2/Scn1b/Grik1/Ngf/Kcnh1/Kcne4/Nkain2/Dhrs7c/Saraf/Cacna1b/Abcb4/Ctnnb1/Kcnip4/Adrb1/Kcnma1/Cacna2d3/Tmem37/Gdnf/Kcng3/Grin2b/Cacna2d1/Cacna1c/Nlgn2/Kcnq2/Rgs7/Prkce/Irs2
GO:0046888	negative regulation of hormone secretion	0.00231213	12	Ghsr/Kcnj11/Pparg/Edn3/Irs1/Nos1/Ppp3ca/Pde3b/Hadh/Ucp2/Kalrn/Map4k4
GO:0006935	chemotaxis	0.0023435	42	Anxa1/Itga2/Efnb2/Cyfip1/Ccl17/Hrh1/Ank3/Cyp19a1/Pla2g7/Cdh13/Robo2/Epha4/Prex1/Plxna2/Fer/Vcam1/Slit3/Pde4d/Kdr/Edn3/Nptn/Foxd1/Smad4/Cdh4/Wnt7b/Scn1b/Celsr3/Prtg/Cxadr/Dcc/Ntrk3/Sema6d/Gdnf/Foxp1/Bcl11b/Cmtm8/Robo1/Lmx1a/Lhx2/Nfib/Pou4f3/Ext1
GO:1990089	response to nerve growth factor	0.00236864	7	Nfkb1/Sh3gl2/Magi2/Ngf/Ntrk3/Ntrk2/Rapgef2
GO:1990090	cellular response to nerve growth factor stimulus	0.00236864	7	Nfkb1/Sh3gl2/Magi2/Ngf/Ntrk3/Ntrk2/Rapgef2
GO:0010975	regulation of neuron projection development	0.00237037	49	Kif13b/Efnb2/Adgrb3/Cyfip1/Ncs1/Sipa1l1/Nedd4/Syt1/Grip1/Ahi1/Tenm3/Enc1/Tmem30a/Robo2/Epha4/Prex1/Numbl/Plxna2/Mef2c/Mapk6/Rbpj/Iqgap1/Bcl11a/Ppp3ca/Stau2/Cdh4/Serpine2/Rims1/Magi2/Scn1b/Snap25/Eef1a1/Ngf/Cpne5/Dcc/Ntrk3/Ntrk2/Negr1/Sema6d/Caprin1/Sdk1/Nlgn2/Robo1/Kalrn/Ntm/Map3k13/Map4k4/Rapgef2/Lrrc4c
GO:0003170	heart valve development	0.00243402	10	Sox9/Tgfbr2/Robo2/Sox4/Mef2c/Rbpj/Slit3/Fgfrl1/Smad4/Robo1
GO:2000727	positive regulation of cardiac muscle cell differentiation	0.00248373	6	Efnb2/Akap6/Mef2c/Rbpj/Adrb1/Foxp1
GO:0006936	muscle contraction	0.00252962	24	Itga2/Tshz3/Pln/Ghsr/Chrm3/Akap6/Atp1b1/Map2k6/Ryr3/Pde4d/Hsbp1/Edn3/Nos1/Tnni3k/Scn1b/Kcne4/Hdac4/Myom2/Adrb1/Kcnma1/Gdnf/Cacna2d1/Cacna1c/Grk2
GO:0060560	developmental growth involved in morphogenesis	0.00254083	26	Ppp2r3a/Esr1/Cyfip1/Sox9/Syt1/Kif26b/Tgfbr2/Sh3gl2/Auts2/Nkd1/Slit3/Iqgap1/Bcl11a/Cdh4/Fmn1/Rims1/Wnt7b/Ngf/Cpne5/Ntrk3/Ctnnb1/Sema6d/Robo1/Lhx2/Map3k13/Pou4f3
GO:0010464	regulation of mesenchymal cell proliferation	0.00257299	9	Sox9/Tgfbr2/Kdr/Irs1/Mycn/Ctnnb1/Foxp1/Nfib/Irs2
GO:0002053	positive regulation of mesenchymal cell proliferation	0.00258221	8	Sox9/Tgfbr2/Kdr/Irs1/Mycn/Ctnnb1/Foxp1/Irs2
GO:0014855	striated muscle cell proliferation	0.00260561	11	Megf10/Tgfbr2/Mef2c/Rbpj/Cited2/Tenm4/Jarid2/Cxadr/Ctnnb1/Foxp1/Erbb4
GO:0072078	nephron tubule morphogenesis	0.00260561	11	Sox9/Kif26b/Ahi1/Adamts16/Pbx1/Foxd1/Lama5/Smad4/Fmn1/Ctnnb1/Gdnf
GO:0060541	respiratory system development	0.00260597	23	Tshz3/Pdpn/Hmga2/Sox9/Sp3/Hs6st1/Tgfbr2/Rbpj/Kdr/Srsf6/Lama5/Fgfrl1/Kras/Pkdcc/Wnt7b/Nkx2-9/Slc7a11/Meg3/Mycn/Ctnnb1/Foxp1/Thrb/Nfib
GO:0098655	cation transmembrane transport	0.00261518	47	Pln/Hrh1/Nedd4/Atp6v1g3/Stoml2/Ank3/Akap6/Mcoln2/Trpc7/Slc30a10/Atp1b1/Wnk2/Scn9a/Kcnj11/Mef2c/Kcna6/Ryr3/Pde4d/Edn3/Rgs9/Nos1/Kcng1/Fam155a/Scn1b/Ngf/Kcnh1/Kcne4/Dhrs7c/Cacna1b/Kcnip4/Adrb1/Kcnma1/Cacna2d3/Tmem37/Atp2c1/Kcng3/Grin2b/Slc30a8/Cacna2d1/Micu1/Cacna1c/Nlgn2/Kcnq2/Rgs7/Prkce/Atp2b1/Tmem38b
GO:0033555	multicellular organismal response to stress	0.00266845	12	Scn9a/Mef2c/Runx1/Nos1/Ppp3ca/Vdac3/Grik1/Cacna1b/Lypd1/Adrb1/Grin2b/Kalrn
GO:0061564	axon development	0.00270655	43	Ntng1/Kif13b/Efnb2/Cyfip1/Sipa1l1/Ank3/Dst/Robo2/Epha4/Auts2/Numbl/Plxna2/Slit3/Nptn/Foxd1/Bcl11a/Smad4/Cdh4/Slitrk5/Wnt7b/Nkx2-9/Scn1b/Celsr3/Ngf/Prtg/Arhgef28/Cdh11/Dcc/Ntrk3/Ntrk2/Sema6d/Gdnf/Foxp1/Bcl11b/Robo1/Kalrn/Lmx1a/Lhx2/Map3k13/Nfib/Pou4f3/Ext1/Lrrc4c
GO:0035051	cardiocyte differentiation	0.00276513	19	Nebl/Efnb2/Akap6/Mir145a/Anxa2/Neb/Mef2a/Mef2c/Vcam1/Rbpj/Cited2/Tenm4/Prickle1/Smad4/Cxadr/Ctnnb1/Myom2/Adrb1/Foxp1
GO:0006941	striated muscle contraction	0.00276969	15	Pln/Akap6/Atp1b1/Map2k6/Ryr3/Pde4d/Nos1/Tnni3k/Scn1b/Kcne4/Hdac4/Adrb1/Cacna2d1/Cacna1c/Grk2
GO:0001654	eye development	0.00301682	33	Ppp2r3a/Hps1/Sox9/Map3k1/Pde6b/Ahi1/Sp3/Tgfbr2/Nphp4/Tenm3/Col4a1/Smarcd3/Kdr/Cited2/Cryaa/Stau2/Agtpbp1/Smg9/Naglu/Tub/Ntrk3/Inhba/Twist2/Ctnnb1/Ntrk2/Bcl11b/Pcnt/Sdk1/Cacna1c/Thrb/Gja8/Lhx2/Six3
GO:0150063	visual system development	0.00301682	33	Ppp2r3a/Hps1/Sox9/Map3k1/Pde6b/Ahi1/Sp3/Tgfbr2/Nphp4/Tenm3/Col4a1/Smarcd3/Kdr/Cited2/Cryaa/Stau2/Agtpbp1/Smg9/Naglu/Tub/Ntrk3/Inhba/Twist2/Ctnnb1/Ntrk2/Bcl11b/Pcnt/Sdk1/Cacna1c/Thrb/Gja8/Lhx2/Six3
GO:0060048	cardiac muscle contraction	0.00301948	13	Pln/Akap6/Atp1b1/Map2k6/Pde4d/Tnni3k/Scn1b/Kcne4/Hdac4/Adrb1/Cacna2d1/Cacna1c/Grk2
GO:0097484	dendrite extension	0.0030266	7	Cyfip1/Syt1/Sh3gl2/Auts2/Bcl11a/Rims1/Cpne5
GO:0072088	nephron epithelium morphogenesis	0.00303284	11	Sox9/Kif26b/Ahi1/Adamts16/Pbx1/Foxd1/Lama5/Smad4/Fmn1/Ctnnb1/Gdnf
GO:0099170	postsynaptic modulation of chemical synaptic transmission	0.00315322	5	Cyfip1/Nedd4/Ghsr/Ppp3ca/Dcc
GO:0050773	regulation of dendrite development	0.00329802	20	Adgrb3/Cyfip1/Sipa1l1/Nedd4/Epha4/Prex1/Numbl/Mef2c/Mapk6/Iqgap1/Bcl11a/Ppp3ca/Stau2/Ntrk2/Caprin1/Sdk1/Nlgn2/Robo1/Kalrn/Rapgef2
GO:0016202	regulation of striated muscle tissue development	0.00330916	17	Efnb2/Akap6/Megf10/Tgfbr2/Mef2c/Rbpj/Cited2/Smad4/Jarid2/Cxadr/Cenpf/Hdac4/Ctnnb1/Adrb1/Foxp1/Rbfox1/Erbb4
GO:0055021	regulation of cardiac muscle tissue growth	0.00338991	10	Akap6/Tgfbr2/Mef2c/Rbpj/Cited2/Jarid2/Cxadr/Adrb1/Foxp1/Erbb4
GO:0048880	sensory system development	0.00341293	33	Ppp2r3a/Hps1/Sox9/Map3k1/Pde6b/Ahi1/Sp3/Tgfbr2/Nphp4/Tenm3/Col4a1/Smarcd3/Kdr/Cited2/Cryaa/Stau2/Agtpbp1/Smg9/Naglu/Tub/Ntrk3/Inhba/Twist2/Ctnnb1/Ntrk2/Bcl11b/Pcnt/Sdk1/Cacna1c/Thrb/Gja8/Lhx2/Six3
GO:0035249	synaptic transmission, glutamatergic	0.00342859	13	Tshz3/Cdh8/Syt1/Ror2/Mef2c/Unc13b/Serpine2/Grik1/Grik4/Ntrk2/Unc13c/Nlgn2/Kalrn
GO:0060419	heart growth	0.00342859	13	Akap6/Tgfbr2/Mef2c/Rbpj/Cited2/Tenm4/Dusp6/Jarid2/Cxadr/Ctnnb1/Adrb1/Foxp1/Erbb4
GO:0035418	protein localization to synapse	0.00351463	11	Gpc6/Grip1/Ghsr/Abhd17b/Mapk10/Stau2/Magi2/Dlgap1/Snap25/Nlgn2/Kalrn
GO:0072028	nephron morphogenesis	0.00351463	11	Sox9/Kif26b/Ahi1/Adamts16/Pbx1/Foxd1/Lama5/Smad4/Fmn1/Ctnnb1/Gdnf
GO:0009746	response to hexose	0.0035929	16	Rack1/Sox4/Vcam1/Unc13b/Ppp3ca/Smad4/Pde3b/Ptprn2/Ucp2/Nadk/Slc30a8/Map4k4/Grk2/Prkce/Rmi1/Irs2
GO:0009749	response to glucose	0.0035929	16	Rack1/Sox4/Vcam1/Unc13b/Ppp3ca/Smad4/Pde3b/Ptprn2/Ucp2/Nadk/Slc30a8/Map4k4/Grk2/Prkce/Rmi1/Irs2
GO:0051259	protein complex oligomerization	0.00359959	39	Stxbp3/Pln/Olfm4/Tmem120b/Akap2/Syt1/Stoml2/Nell2/Mcoln2/Anxa2/Col1a2/Rack1/Kcna6/Irs1/Kcng1/Dut/Fgfrl1/Slc6a1/Smad4/Cryaa/Cryz/Cubn/Magi2/Eef1a1/Prtg/Trps1/Me1/Dnm1/Ect2/Ctnnb1/Kcnma1/Dgkh/Kcng3/Grin2b/Nell1/Micu1/Gja8/Tmc8/Khdrbs3
GO:0030534	adult behavior	0.00365683	17	Ghsr/Epha4/Pcdh15/Nos1/Slitrk5/Slc7a11/Grik1/Ngf/Agtpbp1/Dnm1/Kcnma1/Cntnap2/Sdk1/Cacna1c/Nlgn2/Kalrn/Id2
GO:0061337	cardiac conduction	0.00369687	9	Pln/Mef2a/Pde4d/Tnni3k/Scn1b/Cxadr/Kcne4/Cacna2d1/Cacna1c
GO:0045666	positive regulation of neuron differentiation	0.00379917	39	Cyfip1/Syt1/Grip1/Ahi1/Tenm3/Enc1/Tmem30a/Robo2/Epha4/Numbl/Plxna2/Mef2c/Mapk6/Iqgap1/Bcl11a/Stau2/Cdh4/Serpine2/Rims1/Magi2/Scn1b/Eef1a1/Ngf/Rgs6/Cpne5/Dcc/Ntrk3/Ect2/Ntrk2/Negr1/Caprin1/Etv5/Nlgn2/Robo1/Kalrn/Lmx1a/Map3k13/Mmd/Rapgef2
GO:0031128	developmental induction	0.00381564	7	Sox9/Robo2/Rbpj/Ctnnb1/Gdnf/Robo1/Six3
GO:0048710	regulation of astrocyte differentiation	0.00381564	7	Hmga2/Id4/Epha4/Serpine2/Mycn/Ntrk3/Id2
GO:0051932	synaptic transmission, GABAergic	0.00387965	8	Gabrg3/Kras/Slc6a1/Grik1/Dnm1/Nlgn2/Erbb4/Prkce
GO:0003015	heart process	0.00392753	20	Pln/Akap6/Mef2a/Atp1b1/Map2k6/Pde4d/Edn3/Nos1/Tnni3k/Scn1b/Cxadr/Kcne4/Hdac4/Cacna1b/Adrb1/Cacna2d1/Cacna1c/Thrb/Pebp1/Grk2
GO:0060675	ureteric bud morphogenesis	0.00396841	10	Sox9/Kif26b/Adamts16/Pbx1/Foxd1/Lama5/Smad4/Fmn1/Ctnnb1/Gdnf
GO:0072171	mesonephric tubule morphogenesis	0.00396841	10	Sox9/Kif26b/Adamts16/Pbx1/Foxd1/Lama5/Smad4/Fmn1/Ctnnb1/Gdnf
GO:0034284	response to monosaccharide	0.00398435	16	Rack1/Sox4/Vcam1/Unc13b/Ppp3ca/Smad4/Pde3b/Ptprn2/Ucp2/Nadk/Slc30a8/Map4k4/Grk2/Prkce/Rmi1/Irs2
GO:0055024	regulation of cardiac muscle tissue development	0.0040128	12	Efnb2/Akap6/Tgfbr2/Mef2c/Rbpj/Cited2/Smad4/Jarid2/Cxadr/Adrb1/Foxp1/Erbb4
GO:0060078	regulation of postsynaptic membrane potential	0.0040128	12	Mef2c/Gabrg3/Unc13b/Ppp3ca/Rims1/Nr3c2/Grik1/Adrb1/Grin2b/Nlgn2/Rgs7/Grk2
GO:0048167	regulation of synaptic plasticity	0.00402797	24	Tshz3/Sipa1l1/Hrh1/Mir145a/Epha4/Mef2c/Kdr/Nos1/Kras/Unc13b/Stau2/Serpine2/Rims1/Snap25/Grik1/Mir551b/Ntrk2/Adrb1/Unc13c/Grin2b/Mir153/Kalrn/Rapgef2/Ywhag
GO:0043010	camera-type eye development	0.00409697	29	Hps1/Sox9/Map3k1/Pde6b/Ahi1/Sp3/Tgfbr2/Nphp4/Tenm3/Col4a1/Smarcd3/Kdr/Cited2/Cryaa/Agtpbp1/Tub/Ntrk3/Inhba/Twist2/Ctnnb1/Ntrk2/Bcl11b/Pcnt/Sdk1/Cacna1c/Thrb/Gja8/Lhx2/Six3
GO:0030072	peptide hormone secretion	0.00420087	23	Anxa1/Stxbp3/Hmga2/Ghsr/Sox4/Kcnj11/Pparg/Edn3/Irs1/Nos1/Ppp3ca/Pde3b/Ptprn2/Hadh/Ucp2/Nadk/Slc30a8/Cacna1c/Nlgn2/Kalrn/Map4k4/Prkce/Irs2
GO:0045923	positive regulation of fatty acid metabolic process	0.00434238	6	Anxa1/Ghsr/Abcd2/Pparg/Irs1/Irs2
GO:0061036	positive regulation of cartilage development	0.00434238	6	Sox9/Anxa2/Sox5/Pkdcc/Runx2/Thrb
GO:0072009	nephron epithelium development	0.00438184	13	Sox9/Kif26b/Ahi1/Adamts16/Pbx1/Mef2c/Foxd1/Lama5/Smad4/Fmn1/Wnt7b/Ctnnb1/Gdnf
GO:0001502	cartilage condensation	0.00442963	5	Sox9/Ror2/Fgf6/Otor/Mycn
GO:0048266	behavioral response to pain	0.00442963	5	Scn9a/Runx1/Grik1/Grin2b/Kalrn
GO:0098743	cell aggregation	0.00442963	5	Sox9/Ror2/Fgf6/Otor/Mycn
GO:0009743	response to carbohydrate	0.00444284	17	Nfkb1/Rack1/Sox4/Vcam1/Unc13b/Ppp3ca/Smad4/Pde3b/Ptprn2/Ucp2/Nadk/Slc30a8/Map4k4/Grk2/Prkce/Rmi1/Irs2
GO:0048634	regulation of muscle organ development	0.00444284	17	Efnb2/Akap6/Megf10/Tgfbr2/Mef2c/Rbpj/Cited2/Smad4/Jarid2/Cxadr/Cenpf/Hdac4/Ctnnb1/Adrb1/Foxp1/Rbfox1/Erbb4
GO:1901861	regulation of muscle tissue development	0.00444284	17	Efnb2/Akap6/Megf10/Tgfbr2/Mef2c/Rbpj/Cited2/Smad4/Jarid2/Cxadr/Cenpf/Hdac4/Ctnnb1/Adrb1/Foxp1/Rbfox1/Erbb4
GO:1903522	regulation of blood circulation	0.0045185	21	Pln/Hrh1/Chrm3/Akap6/Mef2a/Atp1b1/Pde4d/Edn3/Nos1/Tnni3k/Scn1b/Cxadr/Kcne4/Hdac4/Cacna1b/Adrb1/Cacna2d1/Cacna1c/Thrb/Pebp1/Grk2
GO:0034765	regulation of ion transmembrane transport	0.00455793	34	Pln/Nedd4/Ank3/Akap6/Atp1b1/Wnk2/Scn9a/Kcnj11/Mef2c/Kcna6/Pde4d/Edn3/Rgs9/Nos1/Kcng1/Scn1b/Ngf/Kcnh1/Kcne4/Dhrs7c/Cacna1b/Kcnip4/Adrb1/Kcnma1/Cacna2d3/Tmem37/Kcng3/Cacna2d1/Cacna1c/Nlgn2/Kcnq2/Rgs7/Prkce/Irs2
GO:0010565	regulation of cellular ketone metabolic process	0.00456572	12	Anxa1/Ghsr/Abcd2/Stard4/Pparg/Irs1/Prkag2/Slc7a11/Kcnma1/Prkce/Irs2/Fabp5
GO:0072001	renal system development	0.00459608	27	Upk3a/Tshz3/Mpst/Efnb2/Sox9/Kif26b/Ahi1/Nfia/Adamts16/Robo2/Epha4/Sox4/Pbx1/Col4a1/Mef2c/Foxd1/Lama5/Smad4/Fmn1/Wnt7b/Kirrel3/Cenpf/Ctnnb1/Gdnf/Pcnt/Fras1/Id2
GO:0060043	regulation of cardiac muscle cell proliferation	0.0046926	8	Tgfbr2/Mef2c/Rbpj/Cited2/Jarid2/Cxadr/Foxp1/Erbb4
GO:0006836	neurotransmitter transport	0.00477611	25	Ncs1/Syt1/Ywhaz/Mef2c/Syt10/Edn3/Nos1/Unc13b/Slc6a1/Rims1/Slc7a11/Nr3c2/Snap25/Grik1/Ptprn2/Ngf/Kcnh1/Nrxn3/Cplx4/Cacna1b/Sv2c/Ntrk2/Unc13c/Gdnf/Prkce
GO:0033002	muscle cell proliferation	0.00509917	22	Itga2/Esr1/Abcc4/Megf10/Tgfbr2/Mir145a/Cdh13/Vipr2/Mef2c/Pparg/Rbpj/Cited2/Tenm4/Jarid2/Cxadr/Hdac4/Ctnnb1/Foxp1/Kalrn/Erbb4/Id2/Grk2
GO:0010817	regulation of hormone levels	0.00514501	37	Ghr/Anxa1/Stxbp3/Esr1/Hmga2/Cyp19a1/Nell2/Ghsr/Nfkb1/Ywhaz/Sox4/Kcnj11/Pparg/Vdr/Edn3/Irs1/Runx1/Foxd1/Nos1/Ppp3ca/Smad4/Snap25/Pde3b/Ptprn2/Hadh/Ucp2/Nadk/Inhba/Kcnma1/Slc30a8/Cacna1c/Nlgn2/Kalrn/Pebp1/Map4k4/Prkce/Irs2
GO:0060502	epithelial cell proliferation involved in lung morphogenesis	0.00527751	4	Hmga2/Sox9/Srsf6/Nfib
GO:0030838	positive regulation of actin filament polymerization	0.00533644	11	Gmfg/Cyfip1/Map3k1/Baiap2l1/Carmil1/Fer/Rhobtb1/Fmn1/Nck2/Kirrel/Prkce
GO:0044331	cell-cell adhesion mediated by cadherin	0.00558348	6	Cdh8/Cdh13/Fer/Cdh4/Cdh11/Ptpru
GO:0030073	insulin secretion	0.0056519	19	Anxa1/Stxbp3/Ghsr/Sox4/Kcnj11/Irs1/Nos1/Ppp3ca/Pde3b/Ptprn2/Hadh/Ucp2/Nadk/Slc30a8/Cacna1c/Nlgn2/Map4k4/Prkce/Irs2
GO:0071322	cellular response to carbohydrate stimulus	0.00576543	14	Nfkb1/Rack1/Sox4/Vcam1/Unc13b/Ppp3ca/Smad4/Pde3b/Ptprn2/Ucp2/Nadk/Map4k4/Grk2/Prkce
GO:0001941	postsynaptic membrane organization	0.00585018	7	Lrrtm4/Magi2/Slc7a11/Gdnf/Etv5/Nlgn2/Lrrc4
GO:2000826	regulation of heart morphogenesis	0.00585018	7	Sox9/Tgfbr2/Robo2/Rbpj/Smad4/Ctnnb1/Robo1
GO:0008037	cell recognition	0.00585376	12	Megf10/Ywhaz/Robo2/Epha4/Cd6/Nptn/Celsr3/Prtg/Tub/Nck2/Cntnap2/Robo1
GO:0055017	cardiac muscle tissue growth	0.00585376	12	Akap6/Tgfbr2/Mef2c/Rbpj/Cited2/Tenm4/Jarid2/Cxadr/Ctnnb1/Adrb1/Foxp1/Erbb4
GO:0090257	regulation of muscle system process	0.0059487	20	Itga2/Pln/Ghsr/Chrm3/Akap6/Pde9a/Mef2a/Atp1b1/Mef2c/Pde4d/Ppp3ca/Smad4/Jarid2/Tnni3k/Hdac4/Adrb1/Kcnma1/Foxp1/Cacna1c/Grk2
GO:0001759	organ induction	0.00603504	5	Robo2/Rbpj/Ctnnb1/Gdnf/Robo1
GO:0010829	negative regulation of glucose transmembrane transport	0.00603504	5	Stxbp3/Esr1/Ahi1/Grk2/Fabp5
GO:0072077	renal vesicle morphogenesis	0.00603504	5	Sox9/Kif26b/Fmn1/Ctnnb1/Gdnf
GO:0003197	endocardial cushion development	0.00670357	8	Sox9/Nedd4/Tgfbr2/Robo2/Rbpj/Cited2/Smad4/Robo1
GO:0007528	neuromuscular junction development	0.00670357	8	Nedd4/Col4a1/Unc13b/Utrn/Ntrk2/Unc13c/Etv5/Kalrn
GO:0001822	kidney development	0.0067287	25	Upk3a/Tshz3/Mpst/Efnb2/Sox9/Kif26b/Ahi1/Adamts16/Robo2/Epha4/Sox4/Pbx1/Mef2c/Foxd1/Lama5/Smad4/Fmn1/Wnt7b/Kirrel3/Cenpf/Ctnnb1/Gdnf/Pcnt/Fras1/Id2
GO:0071229	cellular response to acid chemical	0.00686833	18	Sox9/Castor2/Mir145a/Anxa2/Col1a2/Col4a1/Mef2c/Ptgfr/Kdr/Ireb2/Ngf/Rragc/Abcb4/Ntrk2/Foxp1/Mir122/Mir365-1/Prkce
GO:0071331	cellular response to hexose stimulus	0.00692579	13	Rack1/Sox4/Vcam1/Unc13b/Ppp3ca/Smad4/Pde3b/Ptprn2/Ucp2/Nadk/Map4k4/Grk2/Prkce
GO:0071333	cellular response to glucose stimulus	0.00692579	13	Rack1/Sox4/Vcam1/Unc13b/Ppp3ca/Smad4/Pde3b/Ptprn2/Ucp2/Nadk/Map4k4/Grk2/Prkce
GO:0035265	organ growth	0.00696588	20	Esr1/Sox9/Cyp19a1/Akap6/Tgfbr2/Anxa2/Mef2c/Rbpj/Kdr/Cited2/Tenm4/Dusp6/Jarid2/Psap/Cxadr/Ctnnb1/Adrb1/Foxp1/Cacna1c/Erbb4
GO:0048265	response to pain	0.00706499	6	Scn9a/Runx1/Grik1/Cacna1b/Grin2b/Kalrn
GO:0032355	response to estradiol	0.00712808	7	Ghr/Anxa1/Esr1/Prdm2/Ptgfr/Fam210b/Ctnnb1
GO:2000725	regulation of cardiac muscle cell differentiation	0.00712808	7	Efnb2/Akap6/Mef2c/Rbpj/Smad4/Adrb1/Foxp1
GO:0010770	positive regulation of cell morphogenesis involved in differentiation	0.00746853	18	Olfm4/Cyfip1/Robo2/Epha4/Prex1/Carmil1/Numbl/Plxna2/Bcl11a/Stau2/Cdh4/Ngf/Ntrk3/Ntrk2/Caprin1/Robo1/Kalrn/Map3k13
GO:0006816	calcium ion transport	0.00753336	30	Pln/Hrh1/Stoml2/Akap6/Mcoln2/Anxa2/Trpc7/Atp1b1/Vdr/Ryr3/Pde4d/Rgs9/Nos1/Ppp3ca/Fam155a/Ngf/Dhrs7c/Saraf/Cacna1b/Ctnnb1/Adrb1/Cacna2d3/Tmem37/Atp2c1/Grin2b/Cacna2d1/Micu1/Cacna1c/Prkce/Atp2b1
GO:0071326	cellular response to monosaccharide stimulus	0.00771613	13	Rack1/Sox4/Vcam1/Unc13b/Ppp3ca/Smad4/Pde3b/Ptprn2/Ucp2/Nadk/Map4k4/Grk2/Prkce
GO:0003157	endocardium development	0.00778658	4	Anxa2/Rbpj/Kdr/Smad4
GO:0021889	olfactory bulb interneuron differentiation	0.00778658	4	Sall3/Robo2/Robo1/Erbb4
GO:0060736	prostate gland growth	0.00778658	4	Esr1/Sox9/Cyp19a1/Psap
GO:0001678	cellular glucose homeostasis	0.00786153	14	Stxbp3/Rack1/Sox4/Vcam1/Unc13b/Ppp3ca/Smad4/Pde3b/Ptprn2/Ucp2/Nadk/Map4k4/Grk2/Prkce
GO:1905207	regulation of cardiocyte differentiation	0.00792498	8	Efnb2/Akap6/Mef2c/Rbpj/Prickle1/Smad4/Adrb1/Foxp1
GO:0055022	negative regulation of cardiac muscle tissue growth	0.00800939	5	Tgfbr2/Cited2/Jarid2/Cxadr/Foxp1
GO:0061117	negative regulation of heart growth	0.00800939	5	Tgfbr2/Cited2/Jarid2/Cxadr/Foxp1
GO:0072087	renal vesicle development	0.00800939	5	Sox9/Kif26b/Fmn1/Ctnnb1/Gdnf
GO:1902683	regulation of receptor localization to synapse	0.00800939	5	Gpc6/Ghsr/Nptn/Magi2/Kalrn
GO:0033500	carbohydrate homeostasis	0.00812059	20	Stxbp3/Rack1/Sox4/Pparg/Vcam1/Unc13b/Ppp3ca/Smad4/Pde3b/Ptprn2/Csmd1/Ucp2/Nadk/Ppp1r3g/Cacna1c/Map4k4/Grk2/Prkce/Rmi1/Fabp5
GO:0042593	glucose homeostasis	0.00812059	20	Stxbp3/Rack1/Sox4/Pparg/Vcam1/Unc13b/Ppp3ca/Smad4/Pde3b/Ptprn2/Csmd1/Ucp2/Nadk/Ppp1r3g/Cacna1c/Map4k4/Grk2/Prkce/Rmi1/Fabp5
GO:0006942	regulation of striated muscle contraction	0.00819664	9	Pln/Akap6/Atp1b1/Pde4d/Tnni3k/Hdac4/Adrb1/Cacna1c/Grk2
GO:0048645	animal organ formation	0.00819664	9	Tgfbr2/Robo2/Smarcd3/Mef2c/Rbpj/Cited2/Ctnnb1/Gdnf/Robo1
GO:0070588	calcium ion transmembrane transport	0.00851259	22	Pln/Stoml2/Akap6/Mcoln2/Trpc7/Atp1b1/Ryr3/Pde4d/Fam155a/Ngf/Dhrs7c/Cacna1b/Adrb1/Cacna2d3/Tmem37/Atp2c1/Grin2b/Cacna2d1/Micu1/Cacna1c/Prkce/Atp2b1
GO:0035107	appendage morphogenesis	0.00908662	17	Chst11/Sox9/Ror2/Lnpk/Sall3/Sox4/Pbx1/Plxna2/Pkdcc/Smad4/Fmn1/Runx2/Mycn/Ctnnb1/Pcnt/Cacna1c/Fras1
GO:0035108	limb morphogenesis	0.00908662	17	Chst11/Sox9/Ror2/Lnpk/Sall3/Sox4/Pbx1/Plxna2/Pkdcc/Smad4/Fmn1/Runx2/Mycn/Ctnnb1/Pcnt/Cacna1c/Fras1
GO:0048708	astrocyte differentiation	0.00925438	10	Hmga2/Sox9/Id4/Ror2/Epha4/Kras/Serpine2/Mycn/Ntrk3/Id2
GO:0001657	ureteric bud development	0.00928394	12	Tshz3/Sox9/Kif26b/Adamts16/Robo2/Pbx1/Foxd1/Lama5/Smad4/Fmn1/Ctnnb1/Gdnf
GO:0072163	mesonephric epithelium development	0.00928394	12	Tshz3/Sox9/Kif26b/Adamts16/Robo2/Pbx1/Foxd1/Lama5/Smad4/Fmn1/Ctnnb1/Gdnf
GO:0072164	mesonephric tubule development	0.00928394	12	Tshz3/Sox9/Kif26b/Adamts16/Robo2/Pbx1/Foxd1/Lama5/Smad4/Fmn1/Ctnnb1/Gdnf
GO:0043392	negative regulation of DNA binding	0.00930614	8	Id4/Ankrd33/Gzma/Twist2/Tnks/Lhx2/Id2/Nfib
GO:0055117	regulation of cardiac muscle contraction	0.00930614	8	Pln/Akap6/Atp1b1/Pde4d/Tnni3k/Hdac4/Adrb1/Cacna1c
GO:0010463	mesenchymal cell proliferation	0.00945574	9	Sox9/Tgfbr2/Kdr/Irs1/Mycn/Ctnnb1/Foxp1/Nfib/Irs2
GO:0048736	appendage development	0.00952737	18	Chst11/Sox9/Ror2/Lnpk/Sall3/Sox4/Pbx1/Plxna2/Pkdcc/Smad4/Fmn1/Slc7a11/Runx2/Mycn/Ctnnb1/Pcnt/Cacna1c/Fras1
GO:0060173	limb development	0.00952737	18	Chst11/Sox9/Ror2/Lnpk/Sall3/Sox4/Pbx1/Plxna2/Pkdcc/Smad4/Fmn1/Slc7a11/Runx2/Mycn/Ctnnb1/Pcnt/Cacna1c/Fras1
GO:0001505	regulation of neurotransmitter levels	0.00969561	28	Esr1/Ncs1/Hrh1/Syt1/Ddah1/Mef2c/Syt10/Edn3/Nos1/Unc13b/Slc6a1/Rims1/Slc7a11/Nr3c2/Snap25/Ptprn2/Dagla/Ngf/Kcnh1/Agtpbp1/Nrxn3/Cplx4/Cacna1b/Ntrk2/Unc13c/Gdnf/Pebp1/Prkce
GO:0021700	developmental maturation	0.00989735	25	Adgrb3/Nfia/Ywhaz/Pparg/Rbpj/Kdr/Rere/Runx1/Bcl11a/Unc13b/Fam210b/Ngf/Nrg2/Runx2/Pou2f2/Ctnnb1/Kcnma1/Unc13c/Cntnap2/Erbb4/Pebp1/Mreg/Map3k13/Id2/Six3
GO:0007269	neurotransmitter secretion	0.0103066	18	Ncs1/Syt1/Mef2c/Syt10/Edn3/Unc13b/Rims1/Nr3c2/Snap25/Ptprn2/Ngf/Kcnh1/Nrxn3/Cplx4/Cacna1b/Ntrk2/Unc13c/Prkce
GO:0099643	signal release from synapse	0.0103066	18	Ncs1/Syt1/Mef2c/Syt10/Edn3/Unc13b/Rims1/Nr3c2/Snap25/Ptprn2/Ngf/Kcnh1/Nrxn3/Cplx4/Cacna1b/Ntrk2/Unc13c/Prkce
GO:0001823	mesonephros development	0.0103467	12	Tshz3/Sox9/Kif26b/Adamts16/Robo2/Pbx1/Foxd1/Lama5/Smad4/Fmn1/Ctnnb1/Gdnf
GO:0010837	regulation of keratinocyte proliferation	0.0103907	5	Efnb2/Vdr/Srsf6/Twist2/Bcl11b
GO:0014821	phasic smooth muscle contraction	0.0103907	5	Tshz3/Ghsr/Edn3/Kcnma1/Gdnf
GO:0032801	receptor catabolic process	0.0103907	5	Nedd4/Kif16b/Znrf3/Anxa2/Ptpn1
GO:0045662	negative regulation of myoblast differentiation	0.0103907	5	Sox9/Ccl17/Prickle1/Ankrd2/Zfhx3
GO:0055003	cardiac myofibril assembly	0.0103907	5	Nebl/Neb/Mef2a/Smad4/Myom2
GO:0070207	protein homotrimerization	0.0103907	5	Nell2/Dut/Smad4/Cubn/Nell1
GO:0072273	metanephric nephron morphogenesis	0.0103907	5	Sox9/Kif26b/Fmn1/Ctnnb1/Gdnf
GO:0070838	divalent metal ion transport	0.0106798	32	Pln/Hrh1/Stoml2/Akap6/Mcoln2/Anxa2/Trpc7/Slc30a10/Atp1b1/Vdr/Ryr3/Pde4d/Rgs9/Nos1/Ppp3ca/Fam155a/Ngf/Dhrs7c/Saraf/Cacna1b/Ctnnb1/Adrb1/Cacna2d3/Tmem37/Atp2c1/Grin2b/Slc30a8/Cacna2d1/Micu1/Cacna1c/Prkce/Atp2b1
GO:0043616	keratinocyte proliferation	0.0108456	6	Efnb2/Cdh13/Vdr/Srsf6/Twist2/Bcl11b
GO:0055026	negative regulation of cardiac muscle tissue development	0.0108456	6	Tgfbr2/Cited2/Smad4/Jarid2/Cxadr/Foxp1
GO:1905209	positive regulation of cardiocyte differentiation	0.0108456	6	Efnb2/Akap6/Mef2c/Rbpj/Adrb1/Foxp1
GO:0010611	regulation of cardiac muscle hypertrophy	0.0108555	9	Akap6/Pde9a/Mef2a/Mef2c/Ppp3ca/Smad4/Jarid2/Adrb1/Foxp1
GO:0046324	regulation of glucose import	0.0108589	8	Stxbp3/Esr1/Ahi1/Mef2a/Irs1/Erbb4/Grk2/Irs2
GO:0006828	manganese ion transport	0.0109684	4	Hrh1/Trpc7/Slc30a10/Atp2c1
GO:0021756	striatum development	0.0109684	4	Slitrk5/Slc7a11/Inhba/Bcl11b
GO:0035584	calcium-mediated signaling using intracellular calcium source	0.0109684	4	Vcam1/Ptgfr/Kdr/Ntrk2
GO:0060044	negative regulation of cardiac muscle cell proliferation	0.0109684	4	Tgfbr2/Cited2/Jarid2/Cxadr
GO:0086012	membrane depolarization during cardiac muscle cell action potential	0.0109684	4	Ank3/Scn1b/Cacna2d1/Cacna1c
GO:1902259	regulation of delayed rectifier potassium channel activity	0.0109684	4	Ank3/Akap6/Kcng1/Kcne4
GO:0008584	male gonad development	0.0111551	11	Esr1/Hmga2/Sox9/Safb2/Arid4a/Kdr/Cited2/Smad4/Ercc1/Inhba/Wdr48
GO:0072511	divalent inorganic cation transport	0.0112454	32	Pln/Hrh1/Stoml2/Akap6/Mcoln2/Anxa2/Trpc7/Slc30a10/Atp1b1/Vdr/Ryr3/Pde4d/Rgs9/Nos1/Ppp3ca/Fam155a/Ngf/Dhrs7c/Saraf/Cacna1b/Ctnnb1/Adrb1/Cacna2d3/Tmem37/Atp2c1/Grin2b/Slc30a8/Cacna2d1/Micu1/Cacna1c/Prkce/Atp2b1
GO:0046928	regulation of neurotransmitter secretion	0.0115487	14	Ncs1/Syt1/Mef2c/Edn3/Unc13b/Rims1/Nr3c2/Ngf/Kcnh1/Nrxn3/Cplx4/Cacna1b/Ntrk2/Prkce
GO:0048024	regulation of mRNA splicing, via spliceosome	0.0118737	10	Srsf7/Prdx6/Sfswap/Srsf4/Srsf6/Zfp64/Rbfox3/Srrm4/Rbfox1/Khdrbs3
GO:0070252	actin-mediated cell contraction	0.0118737	10	Pdpn/Pln/Akap6/Pde4d/Scn1b/Kcne4/Pard3/Adrb1/Cacna2d1/Cacna1c
GO:0014743	regulation of muscle hypertrophy	0.0124052	9	Akap6/Pde9a/Mef2a/Mef2c/Ppp3ca/Smad4/Jarid2/Adrb1/Foxp1
GO:0061035	regulation of cartilage development	0.0124052	9	Sox9/Anxa2/Lnpk/Sox5/Pkdcc/Trps1/Runx2/Ctnnb1/Thrb
GO:0097120	receptor localization to synapse	0.0124052	9	Gpc6/Grip1/Ghsr/Mapk10/Anks1b/Nptn/Magi2/Snap25/Kalrn
GO:0046546	development of primary male sexual characteristics	0.012473	11	Esr1/Hmga2/Sox9/Safb2/Arid4a/Kdr/Cited2/Smad4/Ercc1/Inhba/Wdr48
GO:0021953	central nervous system neuron differentiation	0.0125417	20	Id4/Sall3/Robo2/Epha4/Sox4/Sox5/Scn1b/Arhgef28/Cdh11/Agtpbp1/Dcc/Inhba/Ctnnb1/Ntrk2/Bcl11b/Robo1/Lmx1a/Erbb4/Nfib/Rapgef2
GO:0008038	neuron recognition	0.0125952	8	Ywhaz/Robo2/Epha4/Nptn/Celsr3/Prtg/Cntnap2/Robo1
GO:0060428	lung epithelium development	0.0125952	8	Hmga2/Sox9/Rbpj/Srsf6/Wnt7b/Foxp1/Thrb/Nfib
GO:0072006	nephron development	0.0126531	14	Sox9/Kif26b/Ahi1/Adamts16/Pbx1/Mef2c/Foxd1/Lama5/Smad4/Fmn1/Wnt7b/Kirrel3/Ctnnb1/Gdnf
GO:0043484	regulation of RNA splicing	0.0127523	12	Srsf7/Prdx6/Sfswap/Srsf4/Srsf6/Zfp64/Rbfox3/Srrm4/Zfp326/Rbfox1/Khdrbs3/Brdt
GO:0048469	cell maturation	0.0130503	16	Adgrb3/Pparg/Kdr/Runx1/Bcl11a/Fam210b/Ngf/Runx2/Pou2f2/Ctnnb1/Kcnma1/Cntnap2/Pebp1/Map3k13/Id2/Six3
GO:0032228	regulation of synaptic transmission, GABAergic	0.0131913	6	Kras/Slc6a1/Grik1/Nlgn2/Erbb4/Prkce
GO:0060479	lung cell differentiation	0.0131913	6	Sox9/Rbpj/Ctnnb1/Foxp1/Thrb/Nfib
GO:0086065	cell communication involved in cardiac conduction	0.0131913	6	Pde4d/Tnni3k/Scn1b/Cxadr/Cacna2d1/Cacna1c
GO:0045648	positive regulation of erythrocyte differentiation	0.0132147	5	Inpp5d/Fam210b/Ets1/Inhba/Id2
GO:0090263	positive regulation of canonical Wnt signaling pathway	0.0133763	10	Ppp2r3a/Rnf220/Ror2/Nfkb1/Sox4/Wnk2/Rbpj/Tnks2/Tnks/Lmx1a
GO:0048588	developmental cell growth	0.0135882	22	Cyfip1/Sox9/Syt1/Akap6/Tgfbr2/Sh3gl2/Auts2/Slit3/Iqgap1/Bcl11a/Cdh4/Rims1/Ngf/Cpne5/Ntrk3/Ctnnb1/Adrb1/Sema6d/Foxp1/Lhx2/Map3k13/Pou4f3
GO:0099003	vesicle-mediated transport in synapse	0.0135882	22	Efnb2/Ncs1/Nedd4/Syt1/Grip1/Sh3gl2/Mapk10/Iqsec1/Syt10/Unc13b/Rims1/Nr3c2/Snap25/Kcnh1/Nrxn3/Tmem230/Cplx4/Dnm1/Ctnnb1/Unc13c/Nlgn2/Prkce
GO:0021954	central nervous system neuron development	0.013906	11	Sall3/Robo2/Epha4/Scn1b/Arhgef28/Cdh11/Dcc/Ntrk2/Robo1/Nfib/Rapgef2
GO:0015718	monocarboxylic acid transport	0.0140601	13	Anxa1/Abcc4/Map2k6/Pparg/Slc16a6/Slc16a7/Slc6a1/Slc16a8/Grik1/Pla2g2d/Abcb4/Slco3a1/Irs2
GO:0046620	regulation of organ growth	0.014105	12	Akap6/Tgfbr2/Mef2c/Rbpj/Cited2/Dusp6/Jarid2/Cxadr/Adrb1/Foxp1/Cacna1c/Erbb4
GO:0010827	regulation of glucose transmembrane transport	0.0141136	9	Stxbp3/Esr1/Ahi1/Mef2a/Irs1/Erbb4/Grk2/Irs2/Fabp5
GO:0034329	cell junction assembly	0.0142119	19	Itga2/Cdh8/Cdh13/Dst/Nphp4/Epb41l3/Bcas3/Kdr/Iqgap1/Cdh4/Fmn1/Cd9/Cdh11/Ect2/Ctnnb1/Pkn2/Pard3/Map4k4/Rapgef2
GO:0019217	regulation of fatty acid metabolic process	0.0145266	8	Anxa1/Ghsr/Abcd2/Pparg/Irs1/Prkag2/Irs2/Fabp5
GO:0086003	cardiac muscle cell contraction	0.0145266	8	Pln/Akap6/Pde4d/Scn1b/Kcne4/Adrb1/Cacna2d1/Cacna1c
GO:0009154	purine ribonucleotide catabolic process	0.0148812	4	Nudt9/Pde9a/Pde4d/Nudt4
GO:0009261	ribonucleotide catabolic process	0.0148812	4	Nudt9/Pde9a/Pde4d/Nudt4
GO:0032230	positive regulation of synaptic transmission, GABAergic	0.0148812	4	Grik1/Nlgn2/Erbb4/Prkce
GO:0046325	negative regulation of glucose import	0.0148812	4	Stxbp3/Esr1/Ahi1/Grk2
GO:0072283	metanephric renal vesicle morphogenesis	0.0148812	4	Kif26b/Fmn1/Ctnnb1/Gdnf
GO:0098696	regulation of neurotransmitter receptor localization to postsynaptic specialization membrane	0.0148812	4	Gpc6/Ghsr/Magi2/Kalrn
GO:1902307	positive regulation of sodium ion transmembrane transport	0.0148812	4	Ank3/Atp1b1/Wnk2/Nos1
GO:0051668	localization within membrane	0.0149959	18	Lrrtm4/Gpc6/Efnb2/Nedd4/Grip1/Ghsr/Cdh13/Mapk10/Iqsec1/Anks1b/Nptn/Magi2/Slc7a11/Snap25/Dnm1/Grin2b/Etv5/Kalrn
GO:0090276	regulation of peptide hormone secretion	0.0149959	18	Hmga2/Ghsr/Sox4/Kcnj11/Pparg/Irs1/Nos1/Ppp3ca/Pde3b/Hadh/Ucp2/Nadk/Slc30a8/Nlgn2/Kalrn/Map4k4/Prkce/Irs2
GO:0034101	erythrocyte homeostasis	0.0154229	13	Sp3/Inpp5d/Arid4a/Bpgm/Cited2/Ireb2/Rps24/Fam210b/Ets1/Fech/Inhba/Mir122/Id2
GO:0110110	positive regulation of animal organ morphogenesis	0.0154599	11	Hmga2/Sox9/Tgfbr2/Robo2/Rbpj/Vdr/Srsf6/Smad4/Ctnnb1/Gdnf/Robo1
GO:0009123	nucleoside monophosphate metabolic process	0.0157765	17	Nudt9/Stoml2/Ola1/Ndufa10/Ndufc2/Atp1b1/Bpgm/Prkag2/Dut/Ndufs1/Uck2/Eno1b/Hdac4/Cyct/Nudt4/Cbfa2t3/Afg1l
GO:0003203	endocardial cushion morphogenesis	0.0158701	6	Sox9/Tgfbr2/Robo2/Rbpj/Smad4/Robo1
GO:0010613	positive regulation of cardiac muscle hypertrophy	0.0158701	6	Akap6/Pde9a/Mef2a/Mef2c/Ppp3ca/Adrb1
GO:0014742	positive regulation of muscle hypertrophy	0.0158701	6	Akap6/Pde9a/Mef2a/Mef2c/Ppp3ca/Adrb1
GO:0045686	negative regulation of glial cell differentiation	0.0158701	6	Hmga2/Id4/Mycn/Ntrk3/Ctnnb1/Id2
GO:0070527	platelet aggregation	0.0158701	6	Stxbp3/Pdpn/Serpine2/Cd9/Slc7a11/Rap2b
GO:0072210	metanephric nephron development	0.0158701	6	Sox9/Kif26b/Foxd1/Fmn1/Ctnnb1/Gdnf
GO:1903115	regulation of actin filament-based movement	0.0158701	6	Pdpn/Pln/Akap6/Pde4d/Adrb1/Cacna1c
GO:0016339	calcium-dependent cell-cell adhesion via plasma membrane cell adhesion molecules	0.0165138	5	Cdh8/Cdh13/Cdh4/Cdh11/Atp2c1
GO:0030851	granulocyte differentiation	0.0165138	5	Sp3/Inpp5d/Cited2/Runx1/Cbfa2t3
GO:0001658	branching involved in ureteric bud morphogenesis	0.0166645	8	Sox9/Adamts16/Pbx1/Foxd1/Lama5/Smad4/Ctnnb1/Gdnf
GO:0035904	aorta development	0.0166645	8	Efnb2/Mir145a/Robo2/Sox4/Rbpj/Kif7/Prickle1/Robo1
GO:0001754	eye photoreceptor cell differentiation	0.016774	7	Ppp2r3a/Sox9/Ahi1/Agtpbp1/Naglu/Ntrk2/Thrb
GO:0043502	regulation of muscle adaptation	0.0168032	10	Akap6/Pde9a/Mef2a/Mef2c/Ppp3ca/Smad4/Jarid2/Hdac4/Adrb1/Foxp1
GO:0050796	regulation of insulin secretion	0.0172586	15	Ghsr/Sox4/Kcnj11/Irs1/Nos1/Ppp3ca/Pde3b/Hadh/Ucp2/Nadk/Slc30a8/Nlgn2/Map4k4/Prkce/Irs2
GO:0043588	skin development	0.0175306	20	Anxa1/Itga2/Sox9/Col1a2/Rbpj/Vdr/Srsf6/Runx1/Lama5/Smad4/Slitrk5/Trps1/Cers3/Inhba/Ctnnb1/Bcl11b/Fras1/Lhx2/Mreg/Wdr48
GO:0001508	action potential	0.0184482	13	Ank3/Scn9a/Scn1b/Kcnmb4/Cxadr/Kcne4/Ntrk3/Ntrk2/Kcnma1/Foxp1/Grin2b/Cacna2d1/Cacna1c
GO:0006937	regulation of muscle contraction	0.0184482	13	Itga2/Pln/Ghsr/Chrm3/Akap6/Atp1b1/Pde4d/Tnni3k/Hdac4/Adrb1/Kcnma1/Cacna1c/Grk2
GO:0051963	regulation of synapse assembly	0.0184482	13	Lrrtm4/Adgrb3/Sipa1l1/Ghsr/Adgrl3/Mef2c/Stau2/Slitrk5/Clstn2/Nrg2/Ntrk3/Ntrk2/Nlgn2
GO:0034330	cell junction organization	0.0185056	22	Itga2/Cdh8/Cdh13/Dst/Nphp4/Epb41l3/Numbl/Bcas3/Iqsec1/Kdr/Iqgap1/Cdh4/Fmn1/Cd9/Cdh11/Cxadr/Ect2/Ctnnb1/Pkn2/Pard3/Map4k4/Rapgef2
GO:0003156	regulation of animal organ formation	0.0189024	6	Robo2/Rbpj/Cited2/Ctnnb1/Gdnf/Robo1
GO:0035136	forelimb morphogenesis	0.0189024	6	Lnpk/Sall3/Fmn1/Runx2/Ctnnb1/Cacna1c
GO:0048814	regulation of dendrite morphogenesis	0.0189541	11	Adgrb3/Sipa1l1/Nedd4/Epha4/Numbl/Ppp3ca/Stau2/Caprin1/Robo1/Kalrn/Rapgef2
GO:0099072	regulation of postsynaptic membrane neurotransmitter receptor levels	0.0189541	11	Gpc6/Efnb2/Nedd4/Grip1/Ghsr/Mapk10/Iqsec1/Magi2/Snap25/Dnm1/Kalrn
GO:0046323	glucose import	0.0190201	8	Stxbp3/Esr1/Ahi1/Mef2a/Irs1/Erbb4/Grk2/Irs2
GO:0006195	purine nucleotide catabolic process	0.0195724	4	Nudt9/Pde9a/Pde4d/Nudt4
GO:0048712	negative regulation of astrocyte differentiation	0.0195724	4	Hmga2/Id4/Mycn/Ntrk3
GO:0061323	cell proliferation involved in heart morphogenesis	0.0195724	4	Sox9/Rbpj/Smad4/Ctnnb1
GO:2000136	regulation of cell proliferation involved in heart morphogenesis	0.0195724	4	Sox9/Rbpj/Smad4/Ctnnb1
GO:0043112	receptor metabolic process	0.0196097	17	Efnb2/Nedd4/Ahi1/Kif16b/Znrf3/Anxa2/Sh3gl2/Mkln1/Iqsec1/Pparg/Cd9/Magi2/Snap25/Dnm1/Ptpn1/Pard3/Grk2
GO:0008544	epidermis development	0.0196381	22	Anxa1/Sox9/Pcdh15/Rbpj/Vdr/Srsf6/Runx1/Lama5/Smad4/Ush1c/Trps1/Cers3/Mycn/Inhba/Myo3b/Ctnnb1/Kcnma1/Atp2c1/Bcl11b/Lhx2/Mreg/Pou4f3
GO:0071248	cellular response to metal ion	0.0201189	13	Syt1/Ank3/Slc30a10/Mef2a/Mef2c/Pparg/Syt10/Ireb2/Iqgap1/Cpne5/Kcnh1/Ect2/Id2
GO:0051966	regulation of synaptic transmission, glutamatergic	0.0202806	9	Tshz3/Syt1/Ror2/Mef2c/Serpine2/Grik1/Ntrk2/Nlgn2/Kalrn
GO:0003272	endocardial cushion formation	0.0203173	5	Tgfbr2/Robo2/Rbpj/Smad4/Robo1
GO:0030318	melanocyte differentiation	0.0203173	5	Hps1/Adamts20/Mef2c/Edn3/Mreg
GO:0042490	mechanoreceptor differentiation	0.0208395	10	Pcdh15/Rbpj/Ush1c/Naglu/Mycn/Ntrk3/Myo3b/Ntrk2/Kcnma1/Pou4f3
GO:0002262	myeloid cell homeostasis	0.0217877	15	Anxa1/Sp3/Inpp5d/Arid4a/Bpgm/Cited2/Ireb2/Rps24/Fam210b/Slc7a11/Ets1/Fech/Inhba/Mir122/Id2
GO:0002062	chondrocyte differentiation	0.0219005	13	Chst11/Sox9/Tgfbr2/Anxa2/Lnpk/Mef2c/Sox5/Pkdcc/Trps1/Runx2/Ctnnb1/Thrb/Nfib
GO:0009161	ribonucleoside monophosphate metabolic process	0.0222571	16	Nudt9/Stoml2/Ola1/Ndufa10/Ndufc2/Atp1b1/Bpgm/Prkag2/Ndufs1/Uck2/Eno1b/Hdac4/Cyct/Nudt4/Cbfa2t3/Afg1l
GO:0048813	dendrite morphogenesis	0.0222571	16	Adgrb3/Sipa1l1/Nedd4/Mef2a/Epha4/Numbl/Rere/Ppp3ca/Dcdc2a/Stau2/Fmn1/Slitrk5/Caprin1/Robo1/Kalrn/Rapgef2
GO:0051590	positive regulation of neurotransmitter transport	0.0223073	6	Syt1/Unc13b/Slc6a1/Rims1/Grik1/Cacna1b
GO:0042491	inner ear auditory receptor cell differentiation	0.0224413	7	Pcdh15/Rbpj/Ush1c/Mycn/Myo3b/Kcnma1/Pou4f3
GO:1903539	protein localization to postsynaptic membrane	0.0224413	7	Gpc6/Grip1/Ghsr/Mapk10/Magi2/Snap25/Kalrn
GO:0062012	regulation of small molecule metabolic process	0.0229765	23	Anxa1/Ppp1cb/Ghsr/Nfkb1/Abcd2/Stard4/Ndufc2/Pparg/Vdr/Irs1/Nos1/Prkag2/Slc7a11/Ncoa2/Me1/Hdac4/Ppp1r3g/Cbfa2t3/Kcnma1/Thrb/Prkce/Irs2/Fabp5
GO:0038127	ERBB signaling pathway	0.0230017	11	Esr1/Sox9/Kif16b/Cdh13/Slc30a10/Fer/Rbpj/Iqgap1/Mvb12b/Pde6h/Nrg2
GO:0007173	epidermal growth factor receptor signaling pathway	0.0231034	10	Esr1/Sox9/Kif16b/Cdh13/Slc30a10/Fer/Iqgap1/Mvb12b/Pde6h/Nrg2
GO:0009166	nucleotide catabolic process	0.0231034	10	Nudt9/Pde9a/Bpgm/Pde4d/Prkag2/Dut/Eno1b/Hdac4/Nudt4/Cbfa2t3
GO:0045685	regulation of glial cell differentiation	0.0231034	10	Hmga2/Id4/Epha4/Pparg/Tenm4/Serpine2/Mycn/Ntrk3/Ctnnb1/Id2
GO:0051592	response to calcium ion	0.0237971	13	Syt1/Mef2a/Pcdh15/Mef2c/Syt10/Iqgap1/Ppp3ca/Kcnmb4/Cpne5/Kcnh1/Ect2/Kcnma1/Pebp1
GO:0048592	eye morphogenesis	0.0238963	16	Ppp2r3a/Sox9/Ahi1/Sp3/Tenm3/Kdr/Cited2/Cryaa/Stau2/Agtpbp1/Naglu/Ctnnb1/Ntrk2/Sdk1/Thrb/Six3
GO:0097479	synaptic vesicle localization	0.0241196	17	Ncs1/Syt1/Syt10/Unc13b/Rims1/Magi2/Nr3c2/Snap25/Kcnh1/Nrxn3/Tmem230/Cplx4/Dnm1/Ctnnb1/Unc13c/Nlgn2/Prkce
GO:0099173	postsynapse organization	0.0241196	17	Lrrtm4/Sipa1l1/Lrfn2/Ghsr/Epha4/Abhd17b/Stau2/Magi2/Slc7a11/Ntrk3/Gdnf/Grin2b/Caprin1/Etv5/Nlgn2/Kalrn/Lrrc4
GO:1990138	neuron projection extension	0.0241196	17	Cyfip1/Syt1/Sh3gl2/Auts2/Slit3/Iqgap1/Bcl11a/Cdh4/Rims1/Ngf/Cpne5/Ntrk3/Ctnnb1/Sema6d/Lhx2/Map3k13/Pou4f3
GO:0001964	startle response	0.0246508	5	Pcdh15/Csmd1/Kcnh1/Grin2b/Npas3
GO:0002026	regulation of the force of heart contraction	0.0246508	5	Pln/Nos1/Adrb1/Pebp1/Grk2
GO:0032768	regulation of monooxygenase activity	0.0246508	5	Esr1/Nfkb1/Vdr/Kras/Gdnf
GO:0033137	negative regulation of peptidyl-serine phosphorylation	0.0246508	5	Rack1/Pde4d/Nos1/Nck2/Grk2
GO:0050994	regulation of lipid catabolic process	0.0246508	5	Abcd2/Irs1/Pde3b/Prkce/Irs2
GO:0042180	cellular ketone metabolic process	0.0246786	14	Anxa1/Cyp19a1/Ghsr/Abcd2/Stard4/Pparg/Irs1/Prkag2/Slc7a11/Kcnma1/Cbr3/Prkce/Irs2/Fabp5
GO:0007611	learning or memory	0.0247166	22	Adgrb3/Hrh1/Ghsr/Pja2/Mef2c/Kras/Slc6a1/Lamb1/Dcdc2a/Fbxw7as1/Vdac3/Slc7a11/Snap25/Ngf/Ntrk2/Adrb1/Grin2b/Cntnap2/Cacna1c/Kalrn/Lmx1a/Prkar1b
GO:0001956	positive regulation of neurotransmitter secretion	0.0250788	4	Syt1/Unc13b/Rims1/Cacna1b
GO:0003176	aortic valve development	0.0250788	4	Robo2/Rbpj/Slit3/Robo1
GO:0030252	growth hormone secretion	0.0250788	4	Hmga2/Ghsr/Cacna1c/Kalrn
GO:0048025	negative regulation of mRNA splicing, via spliceosome	0.0250788	4	Srsf7/Sfswap/Srsf4/Srsf6
[truncated: 153 more rows]

## Sheet: Striatum PSWTvsCtrlWTHypo
Dataset 2: Hypo DhMR-associated gene ontologies
[truncated: 277 more rows]

[truncated: 2 more sheets: Striatum PSHETvsCtrlHETHyper, Striatum PSHETvsCtrlHETHypo]
