# Supplementary material for: Gene by environment interaction mouse model reveals a functional role for 5-hydroxymethylcytosine in neurodevelopmental disorders
Source: HighWire-hosted journal article supplement (doi:10.1101/gr.276137.121), 2021-12-23
Supplement: Supplemental_Dataset_S3.xlsx [file Supplemental_Dataset_S3.xlsx]

## Sheet: Hippocampus PSHETvsControlHET
Dataset 3: Differential expression genes
Hippocampus
PS HET vs Control HET
Gene Symbol	log2(Post-FC)	Direction	FDR
Adcy1	-0.806824	hypo	0
Celsr3	-0.90908	hypo	0
Ablim1	-0.544737	hypo	0
Camk4	-0.595196	hypo	0
Gabpb2	-0.617614	hypo	0
Chd7	-1.05462	hypo	0
Zbtb37	-0.804957	hypo	0
Caln1	-0.549496	hypo	0
Fat1	-0.956663	hypo	0
Med12	-0.528177	hypo	8.22387e-18
Pdcd11	-0.613898	hypo	1.78309e-16
Ctsh	0.66914	hyper	2.2531e-16
Cacna1a	-0.759385	hypo	3.70074e-16
Setbp1	-0.599794	hypo	9.78749e-16
Cep164	-0.67743	hypo	1.63117e-15
Col4a2	-0.723719	hypo	3.30088e-15
Pik3cd	-0.516966	hypo	1.09791e-14
Gm9899	-0.596735	hypo	3.14102e-14
Gm13610	0.697404	hyper	4.08384e-14
Nos1	-0.74428	hypo	1.02136e-13
Nova2	-0.57143	hypo	1.87793e-13
Srrm2	-0.613184	hypo	3.97847e-13
Numa1	-0.808342	hypo	6.4563e-13
Vmp1	0.542008	hyper	2.00745e-12
Stab1	-0.913596	hypo	3.64083e-12
Spen	-1.08274	hypo	1.22216e-11
Gm37593	-2.27862	hypo	1.69787e-11
Setd1a	-0.576829	hypo	2.63252e-11
Gpr63	-0.713474	hypo	3.41837e-11
Ano8	-0.522727	hypo	3.85806e-11
Wdr81	-0.62864	hypo	4.30567e-11
Kmt2b	-0.726232	hypo	5.3573e-11
Sptb	-0.804288	hypo	7.7635e-11
Igsf9b	-0.88162	hypo	8.3804e-11
Proz	-0.550085	hypo	9.01706e-11
Gm38102	-1.02494	hypo	1.69148e-10
Baz2a	-0.523076	hypo	2.1377e-10
Gm17167	-0.959949	hypo	2.38867e-10
Acvr2b	-1.18603	hypo	2.53391e-10
Ift172	-0.547769	hypo	2.67858e-10
Zfp516	-0.621764	hypo	3.01495e-10
Hmcn1	-0.774621	hypo	3.85287e-10
Cep250	-0.937497	hypo	4.1069e-10
Mtx2	0.560594	hyper	5.53467e-10
Prrc2b	-0.656455	hypo	6.48357e-10
Nav2	-0.754265	hypo	7.02101e-10
Utrn	-0.579193	hypo	1.04117e-09
Trio	-0.535804	hypo	1.13553e-09
Gli1	-1.35969	hypo	1.34349e-09
Pkd1	-0.755759	hypo	2.01498e-09
Pagr1a	1.25478	hyper	2.13183e-09
Cabin1	-0.544955	hypo	2.24967e-09
Myh7b	-1.49343	hypo	2.61591e-09
Sned1	-0.734292	hypo	2.77445e-09
Slit3	-0.85216	hypo	2.94457e-09
Hectd4	-0.88797	hypo	3.11269e-09
Tmem254c	1.14971	hyper	3.28265e-09
Gsta4	0.592525	hyper	3.45641e-09
Bach2	-0.55588	hypo	3.62975e-09
Fam216a	0.569879	hyper	4.26161e-09
Hipk2	-1.08343	hypo	5.25954e-09
Tet3	-0.696989	hypo	5.85637e-09
Sec22a	0.683651	hyper	6.15555e-09
Kdm5c	-0.586879	hypo	8.26438e-09
Cad	-0.81979	hypo	9.65682e-09
Gm40518	-1.21129	hypo	1.06087e-08
Ankrd11	-0.620529	hypo	1.10936e-08
Rwdd2a	0.577336	hyper	1.15828e-08
Kcnt1	-0.657984	hypo	1.39817e-08
Ccnh	0.573295	hyper	1.54057e-08
Dnmt3a	-0.604589	hypo	1.84972e-08
Ubr4	-0.654113	hypo	1.94354e-08
Arrb1	-0.53527	hypo	2.16421e-08
Kdm6b	-0.820728	hypo	2.40902e-08
Neat1	-0.749568	hypo	2.68336e-08
9630013A20Rik	1.10702	hyper	3.264e-08
Ighmbp2	-0.546834	hypo	4.68004e-08
Synpr	0.652201	hyper	6.30085e-08
Nt5c1a	-1.12952	hypo	6.53821e-08
Gm37176	-1.18293	hypo	7.03796e-08
Plekha7	-0.538524	hypo	8.09926e-08
Cd9	0.561747	hyper	9.91539e-08
Nup210	-0.58057	hypo	1.05839e-07
Gm49654	-0.740958	hypo	1.12568e-07
Col19a1	-0.777766	hypo	1.15954e-07
Irs1	-0.833418	hypo	1.1933e-07
Fbxl18	-0.572668	hypo	1.22681e-07
Xylt1	-0.561893	hypo	1.337e-07
C1galt1c1	0.557664	hyper	1.41167e-07
Gins4	0.516948	hyper	1.48935e-07
Trabd2b	-1.05812	hypo	1.52942e-07
Safb2	-0.564176	hypo	1.65052e-07
Ppfia4	-0.565331	hypo	1.92116e-07
Pcbd1	0.746266	hyper	2.2285e-07
Col16a1	-0.855158	hypo	2.287e-07
Nckap5	-0.568427	hypo	2.34556e-07
Mrps30	0.520062	hyper	2.46866e-07
Syne2	-0.557908	hypo	2.7261e-07
Tnrc6c	-0.694884	hypo	2.85866e-07
Col4a1	-0.624331	hypo	3.10944e-07
Zfhx2	-0.88684	hypo	3.20072e-07
Trmt61b	0.575179	hyper	3.29738e-07
Pou2f2	-0.676827	hypo	3.39728e-07
Palld	-0.537295	hypo	4.15203e-07
Gm1043	-1.08718	hypo	4.37784e-07
Pou2f1	-0.573191	hypo	4.61735e-07
Nudt7	0.631827	hyper	4.74092e-07
Sh3pxd2a	-0.572816	hypo	5.23653e-07
Mcc	-0.602099	hypo	5.36108e-07
Macf1	-0.726291	hypo	5.89252e-07
Stk10	-0.647976	hypo	6.03087e-07
Soga1	-1.03128	hypo	6.57993e-07
Efcab1	0.894435	hyper	6.72037e-07
Kmt2a	-0.732639	hypo	6.86238e-07
Mrps22	0.667939	hyper	7.0041e-07
Gigyf1	-0.736533	hypo	7.45083e-07
Hspg2	-1.03828	hypo	7.60312e-07
Gon4l	-0.582995	hypo	7.76272e-07
Arhgap32	-0.598599	hypo	8.08898e-07
Lcor	-0.901991	hypo	8.75764e-07
Gm26645	1.35142	hyper	9.8664e-07
Setd1b	-0.857346	hypo	1.04833e-06
Dicer1	-0.549386	hypo	1.1362e-06
Plec	-1.02887	hypo	1.18286e-06
Kif1a	-0.627475	hypo	1.25442e-06
Ago2	-0.671663	hypo	1.35388e-06
Sipa1l1	-0.515351	hypo	1.43561e-06
Tmem240	-0.82769	hypo	1.46472e-06
Hivep3	-0.699494	hypo	1.49661e-06
Grb14	0.532846	hyper	1.56152e-06
Cox5a	0.517383	hyper	1.59435e-06
Flnb	-0.620373	hypo	1.62741e-06
Arhgap31	-0.51839	hypo	1.69605e-06
Pop4	0.5898	hyper	1.76668e-06
Phf2	-0.671086	hypo	1.98127e-06
Cmss1	0.681689	hyper	2.09043e-06
Rreb1	-0.555418	hypo	2.25069e-06
Soga3	-0.560518	hypo	2.42756e-06
Med13l	-0.617352	hypo	2.47499e-06
Rnaset2b	0.64439	hyper	2.66748e-06
Col11a2	-1.05141	hypo	2.71646e-06
Gli3	-0.638643	hypo	2.76661e-06
Ttbk1	-0.734984	hypo	2.98004e-06
Ttn	-1.12958	hypo	3.20755e-06
Fosl2	-0.592306	hypo	3.2654e-06
Fam43a	-0.76686	hypo	3.32297e-06
Gm37266	-1.76095	hypo	3.88563e-06
Srp54b	-0.520217	hypo	4.08531e-06
Als2cl	-0.659456	hypo	4.22325e-06
Cfap206	1.18283	hyper	4.29286e-06
Gan	-0.777623	hypo	4.57873e-06
Zswim8	-0.548975	hypo	4.65277e-06
Samd3	1.9596	hyper	4.88011e-06
Trim56	-0.6011	hypo	5.11565e-06
Atg5	0.528276	hyper	5.44442e-06
Szt2	-0.733729	hypo	5.69806e-06
Dot1l	-0.691852	hypo	5.96325e-06
Olfr570	1.97394	hyper	6.51374e-06
Myo10	-0.531549	hypo	6.71937e-06
Wdfy3	-0.665012	hypo	6.82648e-06
Zbtb16	-0.785108	hypo	7.60781e-06
Hivep1	-0.886815	hypo	8.1122e-06
Huwe1	-0.562674	hypo	8.39753e-06
Kmt2c	-0.597983	hypo	8.54657e-06
Syne1	-0.587564	hypo	9.00036e-06
Sorl1	-0.586978	hypo	9.79487e-06
Fn1	-0.739263	hypo	1.03057e-05
Cand2	-0.720628	hypo	1.04859e-05
Qpct	0.587246	hyper	1.06679e-05
Zfhx2os	-1.02399	hypo	1.18729e-05
Ptprt	-0.68803	hypo	1.20788e-05
Gcn1	-0.867328	hypo	1.31103e-05
Herc2	-0.758329	hypo	1.42233e-05
Tubd1	0.608433	hyper	1.46843e-05
Ppp1r12b	-0.583063	hypo	1.49202e-05
Rab11fip4	-0.531198	hypo	1.51563e-05
Hmbox1	-0.676758	hypo	1.64206e-05
Brat1	-0.562924	hypo	1.92457e-05
Zbtb34	-0.629931	hypo	1.95407e-05
Lsm2	0.651654	hyper	1.98355e-05
Itpr1	-0.851564	hypo	2.10438e-05
Gm46620	-0.584073	hypo	2.19897e-05
Trrap	-0.564859	hypo	2.26288e-05
Gpc6	-0.927979	hypo	2.32687e-05
Dnali1	1.08769	hyper	2.39139e-05
Mroh1	-0.676439	hypo	2.59015e-05
Fam241a	0.651256	hyper	2.6581e-05
Piezo1	-0.70772	hypo	2.76076e-05
Cdh20	-0.695811	hypo	2.83367e-05
Them4	0.52612	hyper	2.9486e-05
Capsl	1.35763	hyper	3.02606e-05
Brpf3	-0.650958	hypo	3.06599e-05
Pcdha9	-0.541634	hypo	3.14863e-05
Otud7a	-0.549021	hypo	3.23289e-05
Nes	-0.586048	hypo	3.27583e-05
Ap5b1	-1.05564	hypo	3.53607e-05
1110012L19Rik	0.605655	hyper	3.67064e-05
Cdc42bpb	-0.653721	hypo	3.80723e-05
Tac1	1.36519	hyper	4.03443e-05
Lrp1	-0.946689	hypo	4.40471e-05
Stard9	-0.691778	hypo	4.7345e-05
Sbno2	-0.710658	hypo	5.07402e-05
Dlgap2	-0.657393	hypo	5.12409e-05
Oprd1	-0.612235	hypo	5.27606e-05
C4b	-0.595138	hypo	5.48228e-05
Nos1ap	-0.755131	hypo	5.53543e-05
5830417I10Rik	-0.538563	hypo	5.58845e-05
Bicra	-0.70504	hypo	5.69758e-05
Pinx1	0.612696	hyper	5.80811e-05
Grid2ip	-1.47177	hypo	5.97689e-05
Map3k9	-0.913922	hypo	6.15003e-05
Lyrm4	0.733815	hyper	6.3304e-05
Dhx38	-0.546556	hypo	6.76904e-05
Phf21b	-0.624196	hypo	7.09098e-05
Gm28048	0.7642	hyper	7.56232e-05
Pcnx2	-0.575967	hypo	7.63121e-05
Dst	-0.961099	hypo	7.90931e-05
Chd3	-0.606061	hypo	8.04956e-05
Vwa5b2	-0.829417	hypo	8.26218e-05
Map1a	-0.773611	hypo	8.40923e-05
Dop1b	-0.615629	hypo	8.55657e-05
Cdhr3	1.03875	hyper	8.70621e-05
Smpdl3a	0.579063	hyper	8.85766e-05
Kif21b	-0.730665	hypo	8.93411e-05
Megf8	-0.629853	hypo	9.01044e-05
Dennd4b	-0.605272	hypo	9.80517e-05
Gm5859	-0.904998	hypo	9.9726e-05
Pdgfrb	-0.640659	hypo	0.000101404
Hacd1	0.91405	hyper	0.000103983
Ryr1	-0.637036	hypo	0.000104856
Mnt	-0.576783	hypo	0.000106615
Nbeal2	-0.709903	hypo	0.000109293
Notch3	-1.10403	hypo	0.000112086
Plxna3	-0.520451	hypo	0.000113031
Coro6	-0.636447	hypo	0.000114001
Trir	0.576631	hyper	0.000118009
Zfp704	-0.617636	hypo	0.000127353
Kif13a	-0.591344	hypo	0.000135111
Kcnk10	-0.548394	hypo	0.000142077
Ksr2	-0.668994	hypo	0.000144476
Ttc28	-0.864142	hypo	0.000150565
Fmn1	-0.689094	hypo	0.000153046
Trhr	0.653379	hyper	0.000154284
Ino80d	-0.592897	hypo	0.000155544
Chd5	-0.820891	hypo	0.000158081
Sinhcaf	0.770283	hyper	0.000161873
Ormdl1	0.71791	hyper	0.000163173
Pih1d2	1.04743	hyper	0.000164473
Ank2	-0.545619	hypo	0.000165775
Nipsnap3b	0.551812	hyper	0.000167079
Arhgef1	-0.632363	hypo	0.000168381
Bace2	0.516268	hyper	0.000177696
Tcp11l1	-0.69317	hypo	0.000180404
1700094D03Rik	0.837316	hyper	0.000183107
Vcl	-0.610788	hypo	0.000190028
Prdm11	-0.793056	hypo	0.000195627
Hdac4	-0.600663	hypo	0.000197069
Srcap	-1.14622	hypo	0.000205904
Flrt1	-0.744334	hypo	0.00021218
Rpf2	0.635839	hyper	0.000213768
Helz	-0.596748	hypo	0.00022024
Tpd52l1	0.56955	hyper	0.000221862
Gm49338	-0.628387	hypo	0.000223495
Cgn	-0.582038	hypo	0.000230266
Prdx4	0.732364	hyper	0.000233747
Eln	-0.756018	hypo	0.000235492
A230072C01Rik	0.520693	hyper	0.000242873
Csmd1	-0.552309	hypo	0.000250368
Cul7	-0.692568	hypo	0.000258004
Tefm	0.693372	hyper	0.00027182
Mical3	-0.620313	hypo	0.000273903
Tmem104	-0.652183	hypo	0.000278096
Nup35	0.668972	hyper	0.000282348
Dmp1	-0.80693	hypo	0.000291072
Itpr3	-0.827396	hypo	0.000300206
Grik3	-0.809994	hypo	0.000302521
Celsr2	-0.807686	hypo	0.000309555
Ormdl2	0.848287	hyper	0.000312008
Notch2	-0.544818	hypo	0.000314466
Lpp	-0.654416	hypo	0.000319393
Ephb2	-0.674361	hypo	0.0003477
Cacybp	0.525946	hyper	0.000356032
Zmiz1	-0.697745	hypo	0.000358841
Tspan6	0.573971	hyper	0.00036169
H6pd	-0.524581	hypo	0.000364559
Ccdc120	-0.61172	hypo	0.000367466
Tnrc18	-0.870825	hypo	0.000379251
Trim59	0.526227	hyper	0.000391268
Pcnt	-0.893991	hypo	0.000397477
Zfp526	-0.595532	hypo	0.000400612
Shc3	-1.02307	hypo	0.000403759
Gm1110	2.15493	hyper	0.000413275
Grin1os	-0.984207	hypo	0.000416481
Jagn1	0.537566	hyper	0.000419699
Prrg1	0.561803	hyper	0.000426191
Mvb12b	-0.640685	hypo	0.000435972
A930004J17Rik	-0.865746	hypo	0.000449193
Safb	-0.519456	hypo	0.000455844
Ndufaf5	0.821066	hyper	0.000462671
Zc3h18	-0.549107	hypo	0.000466117
Gpr26	-0.608812	hypo	0.000483405
Myh9	-0.750291	hypo	0.000486921
Ash1l	-0.630075	hypo	0.000504817
Gstm6	0.592325	hyper	0.000508553
Tbc1d16	-0.546109	hypo	0.000523582
Myl2	1.52368	hyper	0.000542737
Lrp4	-0.603308	hypo	0.000562357
Fam183b	0.957183	hyper	0.000599392
Stac2	-0.54841	hypo	0.000612165
Golga4	-0.587759	hypo	0.000616471
Zpbp	0.85533	hyper	0.000633776
Abca7	-0.602432	hypo	0.00065129
Neb	-1.11296	hypo	0.000669098
Gulp1	0.552677	hyper	0.000687333
4933428G20Rik	-1.18486	hypo	0.000696685
Tnks1bp1	-0.608729	hypo	0.000706132
Vps13d	-0.516821	hypo	0.000710874
Pdcd2	0.636268	hyper	0.000715694
Wnk2	-0.748429	hypo	0.000720567
Jak3	-0.863271	hypo	0.000740155
Ptpn21	-0.613142	hypo	0.000745089
Epb41	-0.659795	hypo	0.000750015
Tenm3	-0.804278	hypo	0.000760093
Pla2g5	1.09596	hyper	0.000780596
Pcdhb2	-0.722412	hypo	0.000790995
Chd4	-0.5167	hypo	0.000806679
Ints1	-0.931689	hypo	0.000811944
Xkr7	-1.08179	hypo	0.000827785
Myh14	-0.825439	hypo	0.000854135
Aimp1	0.550168	hyper	0.000859527
Dchs1	-0.650739	hypo	0.000870482
Myo18a	-0.646489	hypo	0.000881622
Tnrc6b	-0.786675	hypo	0.000892847
Rps6-ps4	0.693436	hyper	0.000898459
Cfap299	1.30862	hyper	0.000904125
Tchh	-0.629787	hypo	0.000915487
Gm14569	0.726225	hyper	0.000926861
Nfic	-0.760128	hypo	0.000944037
Ano2	0.764483	hyper	0.000949794
Lmtk2	-0.530529	hypo	0.000955592
Pax5	-2.0262	hypo	0.00098476
Rap1a	0.567438	hyper	0.00102677
Sp9	0.866499	hyper	0.00103285
Kif26a	-0.744329	hypo	0.00106947
D030056L22Rik	0.552707	hyper	0.00108817
Fnta	0.521688	hyper	0.0011008
Frem2	-0.521709	hypo	0.00110716
Ido1	4.1565	hyper	0.00111351
Atg10	0.591371	hyper	0.00111987
Slc25a13	0.748133	hyper	0.00112633
Mdn1	-0.624711	hypo	0.0011524
Slc43a3	0.94625	hyper	0.00120005
Pitpnm3	-0.61562	hypo	0.00120698
Gm43481	-0.945908	hypo	0.0012349
Tmem251	0.531875	hyper	0.00124192
Kcnk3	-0.637217	hypo	0.00124893
Rnf13	0.550728	hyper	0.00129158
Lhx1	-1.48848	hypo	0.00132043
Hs6st3	-0.954903	hypo	0.00135744
Clybl	0.558884	hyper	0.00137243
Nfix	-0.814424	hypo	0.00138005
Armcx4	-0.746754	hypo	0.00139531
Agap1	-0.529432	hypo	0.00141067
Tekt1	0.8807	hyper	0.00143414
Fam136a	0.626193	hyper	0.00144205
Fam216b	1.1342	hyper	0.00145001
Ntn1	-0.721234	hypo	0.00150649
Spag16	1.11438	hyper	0.00153128
Cul9	-0.752296	hypo	0.00153965
Dus4l	0.540187	hyper	0.00157348
Zfp142	-0.535659	hypo	0.00159063
Arap1	-0.539561	hypo	0.00167728
L3mbtl1	-0.518139	hypo	0.00169519
Vash1	-0.850054	hypo	0.00170414
1700012B09Rik	1.73378	hyper	0.00171309
Etl4	-0.556984	hypo	0.0017776
Atp5c1	0.63415	hyper	0.0017965
Tmem212	1.29203	hyper	0.00180603
Sowahb	-0.701991	hypo	0.00181556
Ppic	0.762773	hyper	0.00183458
Cacna1i	-0.580117	hypo	0.00185355
Cd24a	0.660975	hyper	0.00190119
Ccdc33	1.03724	hyper	0.00194044
Mir670hg	0.643871	hyper	0.00197047
Cdyl2	-0.958713	hypo	0.00200069
Alg5	0.566024	hyper	0.00201082
Mib2	-0.710052	hypo	0.00207231
Gm26982	-0.606658	hypo	0.00210319
Sik2	-0.549951	hypo	0.00213411
Ankrd52	-0.657145	hypo	0.00215519
Mettl5	0.556067	hyper	0.00216571
Psma1	0.634608	hyper	0.00218682
Plch2	-0.546739	hypo	0.00222975
2610037D02Rik	-1.10568	hypo	0.00225146
Nek5	1.11542	hyper	0.00226234
Lamb2	-0.963843	hypo	0.00228414
Pcdhb16	-0.67646	hypo	0.00229509
Selenop	0.53805	hyper	0.00230604
Ccl6	0.714446	hyper	0.00240486
Phldb1	-0.563196	hypo	0.00244986
Gm49521	-1.11235	hypo	0.00246138
Rilp	0.805326	hyper	0.00250806
Cmip	-0.656993	hypo	0.00251989
Gm2163	-1.31645	hypo	0.00255563
Usp43	-1.17509	hypo	0.00256766
Psmb7	0.51816	hyper	0.002604
Notch1	-1.01691	hypo	0.0026282
Cdkn1c	0.804498	hyper	0.00266496
Mtcl1	-0.883249	hypo	0.00267732
Uhrf1bp1	-0.578657	hypo	0.00268987
Tpcn1	-0.538355	hypo	0.00270244
Tecpr1	-0.540083	hypo	0.00271502
Tshz2	-0.88459	hypo	0.00275284
Dagla	-0.593411	hypo	0.00276543
Fhit	0.710261	hyper	0.0027909
Plxnb1	-0.660673	hypo	0.00281645
Gm19391	1.13747	hyper	0.002842
Efhc1	0.821694	hyper	0.00286759
Chia1	1.17118	hyper	0.00290618
Cfap161	1.11952	hyper	0.0029847
Tcea1	0.517106	hyper	0.00299787
Gm20695	1.40906	hyper	0.00301104
Tie1	-0.603568	hypo	0.00302444
Gm28729	1.24299	hyper	0.00303782
Robo4	-0.540225	hypo	0.00322935
Tex13c2	1.3418	hyper	0.0032436
Wfdc18	1.44903	hyper	0.00325791
Pom121	-0.514734	hypo	0.0032722
Lpin1	-0.59616	hypo	0.00328667
Etfbkmt	0.651999	hyper	0.00330114
G630093K05Rik	1.24355	hyper	0.00331565
AY036118	0.517422	hyper	0.00334475
Mtss2	-0.536643	hypo	0.00338839
Fry	-0.544373	hypo	0.00354996
Dctn1	-0.635291	hypo	0.00358021
Rnf138rt1	1.29946	hyper	0.00359531
Zfp758	0.537583	hyper	0.00362578
Gnb3	1.28222	hyper	0.00367178
Ms4a6c	0.927043	hyper	0.00373368
Exph5	-1.4375	hypo	0.00374914
Gm36737	1.97224	hyper	0.00381096
Pifo	1.39238	hyper	0.0038574
Ece1	-0.58491	hypo	0.00387301
6720489N17Rik	0.590639	hyper	0.00388869
Fam205c	-0.733782	hypo	0.00393584
Kcnc3	-0.736362	hypo	0.0039675
Phrf1	-0.519951	hypo	0.00401666
E130114P18Rik	0.837523	hyper	0.00414925
Mettl18	0.613985	hyper	0.00416611
Tet1	-0.542947	hypo	0.00418298
Col1a1	-0.990094	hypo	0.00419984
Zfp568	-0.714056	hypo	0.00423354
Fbxo36	0.762601	hyper	0.00425036
Col5a1	-0.998858	hypo	0.00426731
Hsd11b1	0.532293	hyper	0.00428428
Gm10010	-0.605128	hypo	0.00430128
Gm11762	-1.75973	hypo	0.0043354
Platr25	0.552496	hyper	0.00440405
Iqub	0.907801	hyper	0.00447434
Disp1	-0.553926	hypo	0.00449205
Abl2	-0.515544	hypo	0.0045639
Ank1	-1.05996	hypo	0.00458215
Cbfa2t3	-0.569444	hypo	0.00461905
Gm29695	-0.630701	hypo	0.0046943
Anks1	-0.556453	hypo	0.00471327
Sdk2	-0.700325	hypo	0.00477035
Itgb3	-0.581156	hypo	0.00480871
Rd3	1.09308	hyper	0.00482806
Rfx1	-0.794309	hypo	0.00484745
Got1l1	1.48137	hyper	0.00490577
Akip1	0.666643	hyper	0.00494477
Psma2	0.542811	hyper	0.00496425
Kcnb1	-0.570239	hypo	0.00504258
Myh11	-1.195	hypo	0.00506221
Tnk2	-0.722596	hypo	0.00512116
Nav1	-0.567438	hypo	0.00514083
4833415N18Rik	1.91636	hyper	0.00520087
Sptbn4	-0.730032	hypo	0.00526143
Slc1a2	-0.531682	hypo	0.00528196
Gm18609	-0.820249	hypo	0.0053438
Kmt2d	-0.805063	hypo	0.00536448
Icmt	-0.726997	hypo	0.00538539
Dynlrb2	1.07249	hyper	0.00544826
Iyd	0.70836	hyper	0.00549043
Arg2	0.64909	hyper	0.00555403
Mtrf1	0.540625	hyper	0.00561772
Reln	-0.615805	hypo	0.00566025
Arhgef12	-0.586291	hypo	0.00585398
Ube2a	0.540276	hyper	0.00589747
Lmtk3	-0.825893	hypo	0.00594114
Ntng2	-0.924442	hypo	0.00596303
Pcnx3	-0.846973	hypo	0.00627731
Fdx1	0.594942	hyper	0.00630005
Brd4	-0.515407	hypo	0.00641404
Rnf165	-0.546087	hypo	0.00653085
Klhl33	-0.703685	hypo	0.00657853
Elmsan1	-0.523041	hypo	0.00660239
Srrm4os	-1.4233	hypo	0.00669848
Mdfic	0.705285	hyper	0.00681982
Cactin	-0.684233	hypo	0.00684421
1700024G13Rik	1.31191	hyper	0.0070152
4930522L14Rik	0.775381	hyper	0.00708985
Gpx8	0.73499	hyper	0.00716585
Notch4	-0.655402	hypo	0.00724281
Cdc42bpa	-0.520117	hypo	0.007294
Slc24a5	0.905234	hyper	0.00731963
Pard3b	-0.666737	hypo	0.00734527
Bcl9l	-0.836346	hypo	0.00737096
Serpinb6a	0.560739	hyper	0.00742236
Atm	-0.625895	hypo	0.00744808
Cab39l	0.562155	hyper	0.00752595
Smim5	0.850972	hyper	0.00757821
Zfp963	0.521562	hyper	0.00773615
Sdhaf2	0.519157	hyper	0.00781711
Per1	-0.523676	hypo	0.00787208
Gm20163	-1.53194	hypo	0.00789979
Hist2h3c1	1.30787	hyper	0.00795531
Tns1	-0.592183	hypo	0.00803872
Rapgef1	-0.517645	hypo	0.00806688
Tshz3	-0.608218	hypo	0.00812335
Abl1	-0.530226	hypo	0.00815163
Pard6b	-0.517035	hypo	0.00837916
Pno1	0.629356	hyper	0.00843669
Cacna1g	-0.811883	hypo	0.00849437

## Sheet: Hippocampus PSWT vs ControlWT
Dataset 3: Differential expression genes
Hippocampus
PS WT vs Control WT
Gene Symbol	log2(Post-FC)	Direction	FDR
Gpr6	-1.21452	hypo	4.07589e-05
Catsperz	-0.805748	hypo	0.000422851
2900064F13Rik	-0.604049	hypo	0.00123595
1700113A16Rik	-0.555826	hypo	0.00195839
Nog	-0.662189	hypo	0.00547387

## Sheet: Stria PS HET v Ctrl HET
Dataset 3: Differential expression genes
Striatum
PS HET vs Control HET
Gene Symbol	log2(Post-FC)	Direction	FDR
ENSMUSG00000090407	7.71155	hyper	0
Gm17139	-7.02961	hypo	0
ENSMUSG00000090640	-6.35026	hypo	2.09462e-14
Itpka	-0.177303	hypo	2.6853e-10
Ap3b2	0.205929	hyper	1.51915e-09
Apba2	0.328141	hyper	5.91217e-08
Pitpna	0.130493	hyper	2.34893e-07
Htr2a	0.861454	hyper	9.87936e-07
Gls	0.305285	hyper	1.6947e-06
Vwa5b2	0.567809	hyper	7.84222e-06
Grk2	0.216662	hyper	1.98209e-05
Vstm2l	-0.198738	hypo	3.32785e-05
Homer2	0.519072	hyper	5.6341e-05
ENSMUSG00000042878	-0.3453	hypo	8.25081e-05
Ehbp1l1	-0.257905	hypo	0.000110074
Napb	0.326089	hyper	0.000171366
Grk3	0.543526	hyper	0.00022694
Tex264	-0.204514	hypo	0.000287218
Cox6b2	-1.07343	hypo	0.000358242
Gpc5	0.290314	hyper	0.000424993
Mast1	0.718237	hyper	0.000496643
Gpd2	0.306573	hyper	0.000574315
Tmem254b	1.18354	hyper	0.000687278
Pdha1	0.193398	hyper	0.000841289
Stac2	0.602724	hyper	0.00101867
Mef2c	0.5111	hyper	0.00129749
H2-Q7	-0.988992	hypo	0.00161826
St3gal1	0.730072	hyper	0.0025068
Gria4	0.306129	hyper	0.0036147
4930452B06Rik	0.562644	hyper	0.0047068
Gja1	0.249493	hyper	0.00584041
Chp1	0.206512	hyper	0.00702723
Gm6851	-0.791125	hypo	0.00839709
Nefl	0.305899	hyper	0.00983074
Arhgap44	0.296617	hyper	0.0116236
Efr3a	0.460837	hyper	0.0137185
Slc24a3	0.422175	hyper	0.0161179
Myzap	-2.33142	hypo	0.0187076
Plcxd2	0.816809	hyper	0.0212732
Epha5	0.549839	hyper	0.0239691
Rtl8c	-0.178832	hypo	0.026696
Scube1	1.1967	hyper	0.0297914
Ndst3	0.756601	hyper	0.0328866
Col11a1	0.763561	hyper	0.0359055
Oxt	-4.4985	hypo	0.0395154
ENSMUSG00000083840	5.50329	hyper	0.0432111
Mturn	0.198458	hyper	0.0472282
ENSMUSG00000044341	-0.27349	hypo	0.0511078
Mroh1	0.412659	hyper	0.0552266
Psd2	0.256359	hyper	0.0592585
Ywhag	0.223046	hyper	0.0631936
Pak1	0.31607	hyper	0.0674091
Tnfrsf21	0.285157	hyper	0.0716433
Mcph1	0.489312	hyper	0.0757958
Cd52	-0.736705	hypo	0.0800455
Tshz2	0.916345	hyper	0.0843563
Rbp4	-0.356625	hypo	0.0890757
Cdk2ap1	-0.44244	hypo	0.0937984
Kcnc4	0.500138	hyper	0.0938273
Dcxr	-0.456531	hypo	0.0944778
Sv2b	0.385309	hyper	0.0952273
Nrg3	0.396969	hyper	0.0984977
Shf	-0.224326	hypo	0.0990566
Pcsk1n	-0.273751	hypo	0.0998651

## Sheet: Striatum PSWT vs ControlWT
Dataset 3: Differential expression genes
Striatum
PS WT vs Control WT
Gene Symbol	log2(Post-FC)	Direction	FDR
Samd14	0.499151	hyper	0
ENSMUSG00000021020	-8.28376	hypo	0
Kcnj13	-4.27651	hypo	3.40398e-11
ENSMUSG00000031811	0.331251	hyper	1.43453e-10
Lamp2	-0.31647	hypo	3.54443e-10
Gm12191	-6.04299	hypo	6.87824e-10
Klhl4	-0.583407	hypo	3.00903e-09
Ttr	-6.58993	hypo	2.58699e-08
Dbn1	0.269134	hyper	6.27094e-08
Pcolce2	-0.662094	hypo	1.57731e-07
Enpp2	-0.996716	hypo	2.4949e-07
Tnfaip6	-0.613318	hypo	3.46632e-07
Asphd2	0.278586	hyper	4.51672e-07
Mal	-0.444165	hypo	5.79442e-07
Ndrg1	-0.546043	hypo	7.29863e-07
Hsd17b12	-0.265025	hypo	1.02217e-06
Ip6k1	0.181482	hyper	1.45223e-06
Fjx1	0.307711	hyper	4.00264e-06
Cldn2	-3.97165	hypo	7.36847e-06
Prmt8	0.227899	hyper	1.46703e-05
Smap1	-0.263396	hypo	2.48978e-05
Lamp1	-0.262478	hypo	5.17098e-05
Kcns3	-0.88083	hypo	8.33122e-05
Car14	-0.599598	hypo	0.000110784
Kcne2	-5.99781	hypo	0.000139283
Fam171a2	0.268901	hyper	0.000180149
Agpat4	-0.34552	hypo	0.000222491
Gnb3	-2.70673	hypo	0.00026611
ENSMUSG00000091663	-0.723366	hypo	0.000338087
Tmbim1	-0.500791	hypo	0.000407931
Gjb1	-0.746173	hypo	0.000504534
Ptp4a1	-0.247929	hypo	0.000604119
Fcho1	0.315377	hyper	0.000703571
G530011O06Rik	1.14341	hyper	0.000805215
F5	-2.48919	hypo	0.000907698
Gm9747	-1.34299	hypo	0.00101805
Plppr2	0.336031	hyper	0.0011265
Ugt8a	-0.613104	hypo	0.00133866
Bcl11a	0.38038	hyper	0.00159308
Tmem98	-0.537074	hypo	0.00218715
Ppp1r37	0.147935	hyper	0.00253993
Slc4a5	-2.60793	hypo	0.00291341
1700003E16Rik	0.397888	hyper	0.00335017
Gm11175	0.546261	hyper	0.00377603
ENSMUSG00000075319	-4.79011	hypo	0.00420422
Lrrc10b	0.355341	hyper	0.00466501
Lrrn1	-0.401097	hypo	0.00513733
Lmo3	0.241756	hyper	0.00567496
Sox1ot	0.660008	hyper	0.00631838
Noct	-0.43525	hypo	0.0069587
Lrfn4	0.32057	hyper	0.00758869
Cers2	-0.390803	hypo	0.0082628
Celf4	0.419629	hyper	0.00900029
Gstm7	-0.373443	hypo	0.00999312
ENSMUSG00000079733	0.329503	hyper	0.0109844
Wdr86	-2.47935	hypo	0.0119752
Shox2	-4.44537	hypo	0.0130394
Zxda	1.71153	hyper	0.0141272
Rab37	-1.65372	hypo	0.015212
B3gnt9	-0.729896	hypo	0.0177367
Depdc7	-0.926051	hypo	0.0192122
Slc38a6	-0.593023	hypo	0.0207193
Nyap1	0.330722	hyper	0.0222881
Sh3bgr	-1.59113	hypo	0.023897
Tkt	-0.161297	hypo	0.0254871
Chst2	0.292199	hyper	0.029083
Aqp1	-3.13532	hypo	0.0309028
Cd82	-0.519657	hypo	0.0327735
Btg3	-0.646262	hypo	0.0368858
Gjc2	-0.572916	hypo	0.0393471
Tmem135	-0.23419	hypo	0.0422068
Tmem41b	-0.241285	hypo	0.045368
Pvalb	-1.45421	hypo	0.048636
Gm6158	-0.816616	hypo	0.0519641
Lhfp	-0.415694	hypo	0.0553304
Mog	-0.481052	hypo	0.0619609
Prrg1	-0.630098	hypo	0.0721067
Kcna3	0.944799	hyper	0.0753747
Ramp3	-1.35979	hypo	0.0785848
A2m	-1.5207	hypo	0.0819188
Rpl10-ps1	3.54519	hyper	0.0854384
Cpne1	0.265079	hyper	0.0939895
Rasgef1a	0.315033	hyper	0.0935009
Apod	-0.671738	hypo	0.0925305
Insyn1	0.214759	hyper	0.0963177
Sacm1l	-0.239183	hypo	0.0908701
Ldb1	0.247607	hyper	0.0933087
