# Supplementary material for: Gene by environment interaction mouse model reveals a functional role for 5-hydroxymethylcytosine in neurodevelopmental disorders
Source: HighWire-hosted journal article supplement (doi:10.1101/gr.276137.121), 2021-12-23
Supplement: Supplemental_Dataset_S4.xlsx [file Supplemental_Dataset_S4.xlsx]

## Sheet: Hip DE PSHETvsCtrlHET Up-Reg
Dataset 4: Gene ontologies for up-regulated differential expression genes
Hippocampus
ELS HET vs Control HET
GO ID	Description	P-value	FDR	Gene Symbol
GO:0010499	proteasomal ubiquitin-independent protein catabolic process	0.00110889	0.766502	Psma1/Psmb7/Psma2
GO:0009072	aromatic amino acid family metabolic process	0.00126647	0.766502	Pcbd1/Ido1/Iyd
GO:0001539	cilium or flagellum-dependent cell motility	0.0020349	0.766502	Efcab1/Tekt1/Spag16
GO:0060285	cilium-dependent cell motility	0.0020349	0.766502	Efcab1/Tekt1/Spag16
GO:1901605	alpha-amino acid metabolic process	0.00489209	0.766502	Pcbd1/Prdx4/Ido1/Got1l1/Iyd/Arg2
GO:0043455	regulation of secondary metabolic process	0.00547943	0.766502	Hsd11b1/Slc24a5
GO:0006520	cellular amino acid metabolic process	0.00602986	0.766502	Pcbd1/Prdx4/Aimp1/Ido1/Got1l1/Iyd/Arg2
GO:0043901	negative regulation of multi-organism process	0.00728154	0.766502	Grb14/Prdx4/Tspan6/Trim59/Arg2
GO:1902570	protein localization to nucleolus	0.00746232	0.766502	Pinx1/Rpf2
GO:0060294	cilium movement involved in cell motility	0.00971993	0.766502	Tekt1/Spag16
GO:0032682	negative regulation of chemokine production	0.0109483	0.766502	Cd24a/Arg2
GO:0034111	negative regulation of homotypic cell-cell adhesion	0.0109483	0.766502	Cd9/Cd24a
GO:0051354	negative regulation of oxidoreductase activity	0.0135977	0.766502	Etfbkmt/Arg2
GO:0070230	positive regulation of lymphocyte apoptotic process	0.0135977	0.766502	Ido1/Cd24a
GO:0070233	negative regulation of T cell apoptotic process	0.0135977	0.766502	Ido1/Arg2
GO:0042130	negative regulation of T cell proliferation	0.0136426	0.766502	Ido1/Cd24a/Arg2
GO:0070228	regulation of lymphocyte apoptotic process	0.0136426	0.766502	Ido1/Cd24a/Arg2
GO:0051591	response to cAMP	0.0143473	0.766502	Pla2g5/Rap1a/Fdx1
GO:0006753	nucleoside phosphate metabolic process	0.0147442	0.766502	Nudt7/Cox5a/Smpdl3a/Tefm/Slc25a13/Atp5c1/Fhit/Hsd11b1/Fdx1/Sdhaf2
GO:0002861	regulation of inflammatory response to antigenic stimulus	0.0164953	0.766502	Cd24a/Psma1
GO:0031348	negative regulation of defense response	0.0178133	0.766502	Tspan6/Pla2g5/Cd24a/Psma1/Arg2
GO:0043496	regulation of protein homodimerization activity	0.0180339	0.766502	Pcbd1/Trhr
GO:0003341	cilium movement	0.0181766	0.766502	Dnali1/Tekt1/Spag16
GO:0006665	sphingolipid metabolic process	0.0185286	0.766502	Smpdl3a/Hacd1/Ormdl1/Ormdl2
GO:0002828	regulation of type 2 immune response	0.0196308	0.766502	Ido1/Arg2
GO:0009620	response to fungus	0.0196308	0.766502	Atg5/Jagn1
GO:0030317	flagellated sperm motility	0.0198521	0.766502	Efcab1/Tekt1/Spag16
GO:0051341	regulation of oxidoreductase activity	0.0198521	0.766502	Etfbkmt/Arg2/Fdx1
GO:0097722	sperm motility	0.0198521	0.766502	Efcab1/Tekt1/Spag16
GO:0032945	negative regulation of mononuclear cell proliferation	0.02252	0.766502	Ido1/Cd24a/Arg2
GO:0050672	negative regulation of lymphocyte proliferation	0.02252	0.766502	Ido1/Cd24a/Arg2
GO:0042092	type 2 immune response	0.0229945	0.766502	Ido1/Arg2
GO:0070227	lymphocyte apoptotic process	0.0244018	0.766502	Ido1/Cd24a/Arg2
GO:0034110	regulation of homotypic cell-cell adhesion	0.024759	0.766502	Cd9/Cd24a
GO:0032642	regulation of chemokine production	0.0253736	0.766502	Cd24a/Chia1/Arg2
GO:0030148	sphingolipid biosynthetic process	0.0263661	0.766502	Hacd1/Ormdl1/Ormdl2
GO:0032602	chemokine production	0.0263661	0.766502	Cd24a/Chia1/Arg2
GO:0070664	negative regulation of leukocyte proliferation	0.0263661	0.766502	Ido1/Cd24a/Arg2
GO:0045833	negative regulation of lipid metabolic process	0.0273791	0.766502	Ormdl1/Ormdl2/Etfbkmt
GO:0044839	cell cycle G2/M phase transition	0.0276048	0.766502	Pagr1a/Pinx1/Hacd1/Tpd52l1
GO:0046006	regulation of activated T cell proliferation	0.0284471	0.766502	Ido1/Cd24a
GO:0070229	negative regulation of lymphocyte apoptotic process	0.0284471	0.766502	Ido1/Arg2
GO:0009141	nucleoside triphosphate metabolic process	0.0291618	0.766502	Cox5a/Smpdl3a/Tefm/Slc25a13/Atp5c1/Sdhaf2
GO:0022904	respiratory electron transport chain	0.0294669	0.766502	Cox5a/Slc25a13/Sdhaf2
GO:0046640	regulation of alpha-beta T cell proliferation	0.0303686	0.766502	Cd24a/Arg2
GO:2000108	positive regulation of leukocyte apoptotic process	0.0303686	0.766502	Ido1/Cd24a
GO:0042737	drug catabolic process	0.0316367	0.766502	Ctsh/Prdx4/Chia1
GO:0009117	nucleotide metabolic process	0.0336184	0.766502	Nudt7/Cox5a/Tefm/Slc25a13/Atp5c1/Fhit/Hsd11b1/Fdx1/Sdhaf2
GO:0022900	electron transport chain	0.0362207	0.766502	Cox5a/Slc25a13/Sdhaf2
GO:0002832	negative regulation of response to biotic stimulus	0.0364291	0.766502	Tspan6/Arg2
GO:0046633	alpha-beta T cell proliferation	0.0364291	0.766502	Cd24a/Arg2
GO:0032102	negative regulation of response to external stimulus	0.0373052	0.766502	Cd9/Tspan6/Pla2g5/Cd24a/Psma1/Arg2
GO:0006119	oxidative phosphorylation	0.0374172	0.766502	Cox5a/Tefm/Sdhaf2
GO:1990089	response to nerve growth factor	0.0385444	0.766502	Tac1/Rap1a
GO:1990090	cellular response to nerve growth factor stimulus	0.0385444	0.766502	Tac1/Rap1a
GO:0046683	response to organophosphorus	0.0398706	0.766502	Pla2g5/Rap1a/Fdx1
GO:2000106	regulation of leukocyte apoptotic process	0.0398706	0.766502	Ido1/Cd24a/Arg2
GO:0046034	ATP metabolic process	0.0403079	0.766502	Cox5a/Tefm/Slc25a13/Atp5c1/Sdhaf2
GO:0006739	NADP metabolic process	0.0407055	0.766502	Hsd11b1/Fdx1
GO:0071320	cellular response to cAMP	0.0407055	0.766502	Rap1a/Fdx1
GO:0042445	hormone metabolic process	0.0425908	0.766502	Gnb3/Hsd11b1/Iyd/Fdx1
GO:0070232	regulation of T cell apoptotic process	0.0429113	0.766502	Ido1/Arg2
GO:0060271	cilium assembly	0.0447775	0.766502	Atg5/Dnali1/Tekt1/Spag16/Rilp/Iqub
GO:0050798	activated T cell proliferation	0.0451608	0.766502	Ido1/Cd24a
GO:0022408	negative regulation of cell-cell adhesion	0.0454578	0.766502	Cd9/Ido1/Cd24a/Arg2
GO:0002437	inflammatory response to antigenic stimulus	0.047453	0.766502	Cd24a/Psma1
GO:0010927	cellular component assembly involved in morphogenesis	0.0490808	0.766502	Cd9/Myl2/Zpbp
GO:0050868	negative regulation of T cell activation	0.0490808	0.766502	Ido1/Cd24a/Arg2
GO:0051055	negative regulation of lipid biosynthetic process	0.0497869	0.766502	Ormdl1/Ormdl2

## Sheet: Hip DE PSHETvsCtrlHET Down-Reg
Dataset 4: Gene ontologies for down-regulated differential expression genes
Hippocampus
PS HET vs Control HET
GO ID	Description	P-value	FDR	Gene Symbol
GO:0007409	axonogenesis	4.28912e-08	0.00012577	Adcy1/Celsr3/Ablim1/Cacna1a/Slit3/Sipa1l1/Gli3/Zswim8/Szt2/Fn1/Dst/Map1a/Megf8/Plxna3/Vcl/Ephb2/Lrp4/Golga4/Lmtk2/Lhx1/Ntn1/Lamb2/Notch1/Plxnb1/Sptbn4/Reln/Ntng2/Rnf165/Abl1
GO:0061564	axon development	7.35496e-08	0.00012577	Adcy1/Celsr3/Ablim1/Cacna1a/Slit3/Xylt1/Sipa1l1/Gli3/Zswim8/Szt2/Fn1/Dst/Map1a/Megf8/Plxna3/Vcl/Ephb2/Lrp4/Golga4/Lmtk2/Lhx1/Ntn1/Lamb2/Notch1/Plxnb1/Sptbn4/Reln/Ntng2/Rnf165/Abl1
GO:0016569	covalent chromatin modification	3.7762e-07	0.000430487	Nos1/Setd1a/Kmt2b/Baz2a/Tet3/Kdm5c/Dnmt3a/Arrb1/Kdm6b/Kmt2a/Setd1b/Phf2/Dot1l/Huwe1/Kmt2c/Trrap/Brpf3/Chd5/Hdac4/Ash1l/Pax5/Lpin1/Tet1/Kmt2d/Brd4/Atm/Per1
GO:0016570	histone modification	9.14325e-07	0.000693292	Nos1/Setd1a/Kmt2b/Baz2a/Tet3/Kdm5c/Arrb1/Kdm6b/Kmt2a/Setd1b/Phf2/Dot1l/Huwe1/Kmt2c/Trrap/Brpf3/Chd5/Hdac4/Ash1l/Pax5/Lpin1/Tet1/Kmt2d/Brd4/Atm/Per1
GO:0021517	ventral spinal cord development	1.06448e-06	0.000693292	Cacna1a/Ift172/Ighmbp2/Dicer1/Gli3/Lhx1/Dctn1/Reln
GO:0001501	skeletal system development	1.2163e-06	0.000693292	Chd7/Med12/Acvr2b/Ift172/Pkd1/Ankrd11/Xylt1/Hspg2/Dicer1/Col11a2/Gli3/Zbtb16/Megf8/Pdgfrb/Ryr1/Nbeal2/Fmn1/Hdac4/Notch2/Ash1l/Dchs1/Pax5/Lhx1/Etl4/Plxnb1/Col1a1
GO:0030198	extracellular matrix organization	1.714e-06	0.000837413	Col4a2/Col19a1/Col16a1/Col4a1/Hspg2/Col11a2/Fn1/Eln/Dmp1/Lamb2/Phldb1/Notch1/Col1a1/Col5a1/Abl2/Itgb3/Myh11/Abl1
GO:0043062	extracellular structure organization	3.55224e-06	0.00139857	Col4a2/Col19a1/Col16a1/Col4a1/Hspg2/Col11a2/Fn1/Eln/Dmp1/Abca7/Lamb2/Phldb1/Notch1/Col1a1/Col5a1/Abl2/Itgb3/Myh11/Abl1
GO:0016571	histone methylation	3.68044e-06	0.00139857	Setd1a/Kmt2b/Baz2a/Tet3/Kmt2a/Setd1b/Dot1l/Kmt2c/Chd5/Ash1l/Pax5/Tet1/Kmt2d
GO:0034968	histone lysine methylation	1.13697e-05	0.00335057	Setd1a/Kmt2b/Baz2a/Tet3/Kmt2a/Setd1b/Dot1l/Chd5/Ash1l/Pax5/Kmt2d
GO:0006479	protein methylation	1.17564e-05	0.00335057	Setd1a/Kmt2b/Baz2a/Tet3/Kmt2a/Setd1b/Dot1l/Kmt2c/Chd5/Ash1l/Pax5/Tet1/Kmt2d/Icmt
GO:0008213	protein alkylation	1.17564e-05	0.00335057	Setd1a/Kmt2b/Baz2a/Tet3/Kmt2a/Setd1b/Dot1l/Kmt2c/Chd5/Ash1l/Pax5/Tet1/Kmt2d/Icmt
GO:0048736	appendage development	1.46154e-05	0.00347605	Chd7/Ift172/Dicer1/Gli3/Zbtb16/Megf8/Fmn1/Notch2/Pcnt/Lrp4/Frem2/Notch1/Ece1/Rnf165
GO:0060173	limb development	1.46154e-05	0.00347605	Chd7/Ift172/Dicer1/Gli3/Zbtb16/Megf8/Fmn1/Notch2/Pcnt/Lrp4/Frem2/Notch1/Ece1/Rnf165
GO:0007156	homophilic cell adhesion via plasma membrane adhesion molecules	1.52459e-05	0.00347605	Celsr3/Igsf9b/Hmcn1/Palld/Ptprt/Cdh20/Pcdha9/Celsr2/Tenm3/Dchs1/Sdk2
GO:0035107	appendage morphogenesis	1.80539e-05	0.00363203	Chd7/Dicer1/Gli3/Zbtb16/Megf8/Fmn1/Notch2/Pcnt/Lrp4/Frem2/Notch1/Ece1/Rnf165
GO:0035108	limb morphogenesis	1.80539e-05	0.00363203	Chd7/Dicer1/Gli3/Zbtb16/Megf8/Fmn1/Notch2/Pcnt/Lrp4/Frem2/Notch1/Ece1/Rnf165
GO:0018022	peptidyl-lysine methylation	2.65418e-05	0.00481402	Setd1a/Kmt2b/Baz2a/Tet3/Kmt2a/Setd1b/Dot1l/Chd5/Ash1l/Pax5/Kmt2d
GO:0007411	axon guidance	2.67446e-05	0.00481402	Celsr3/Ablim1/Slit3/Gli3/Zswim8/Megf8/Plxna3/Ephb2/Lmtk2/Lhx1/Ntn1/Lamb2/Plxnb1/Reln/Rnf165
GO:0097485	neuron projection guidance	2.84419e-05	0.00486356	Celsr3/Ablim1/Slit3/Gli3/Zswim8/Megf8/Plxna3/Ephb2/Lmtk2/Lhx1/Ntn1/Lamb2/Plxnb1/Reln/Rnf165
GO:0021510	spinal cord development	3.276e-05	0.00533521	Med12/Cacna1a/Ift172/Ighmbp2/Dicer1/Gli3/Lhx1/Dctn1/Reln
GO:0003002	regionalization	5.09013e-05	0.00773467	Med12/Acvr2b/Ift172/Gli1/Hipk2/Kmt2a/Gli3/Ttn/Zbtb16/Megf8/Celsr2/Notch2/Lrp4/Lhx1/Notch1/Disp1/Reln/Atm
GO:0001654	eye development	5.42784e-05	0.00773467	Chd7/Fat1/Acvr2b/Hipk2/Col4a1/Pou2f1/Gli3/Kmt2c/Rab11fip4/Pdgfrb/Notch2/Ephb2/Pcnt/Tenm3/Frem2/Lhx1/Lamb2/Col5a1/Sdk2
GO:0150063	visual system development	5.42784e-05	0.00773467	Chd7/Fat1/Acvr2b/Hipk2/Col4a1/Pou2f1/Gli3/Kmt2c/Rab11fip4/Pdgfrb/Notch2/Ephb2/Pcnt/Tenm3/Frem2/Lhx1/Lamb2/Col5a1/Sdk2
GO:0009791	post-embryonic development	5.6755e-05	0.00776408	Acvr2b/Kmt2a/Dicer1/Ago2/Szt2/Itpr1/Ash1l/Lhx1/Abl2/Atm/Abl1
GO:0048880	sensory system development	5.93302e-05	0.00780421	Chd7/Fat1/Acvr2b/Hipk2/Col4a1/Pou2f1/Gli3/Kmt2c/Rab11fip4/Pdgfrb/Notch2/Ephb2/Pcnt/Tenm3/Frem2/Lhx1/Lamb2/Col5a1/Sdk2
GO:0051568	histone H3-K4 methylation	6.95225e-05	0.00880619	Setd1a/Kmt2b/Tet3/Kmt2a/Setd1b/Ash1l/Kmt2d
GO:0003334	keratinocyte development	7.3657e-05	0.00899668	Palld/Flnb/Fosl2/Exph5
GO:0016458	gene silencing	7.75735e-05	0.00902115	Kmt2b/Baz2a/Dnmt3a/Tnrc6c/Dicer1/Ago2/Phf2/Dot1l/Srcap/Helz/Tnrc6b/Tet1/Kmt2d
GO:0051056	regulation of small GTPase mediated signal transduction	8.29795e-05	0.00902115	Trio/Arrb1/Sipa1l1/Dennd4b/Pdgfrb/Arhgef1/Notch2/Ephb2/Notch1/Abl2/Icmt/Reln/Arhgef12/Cdc42bpa/Rapgef1/Abl1
GO:0072001	renal system development	8.29821e-05	0.00902115	Acvr2b/Pkd1/Col4a1/Gli3/Zbtb16/Pdgfrb/Notch3/Fmn1/Notch2/Pcnt/Lrp4/Dchs1/Lhx1/Lamb2/Notch1/Itgb3/Tshz3
GO:0072012	glomerulus vasculature development	8.51313e-05	0.00902115	Pdgfrb/Notch3/Notch2/Notch1/Itgb3
GO:0040029	regulation of gene expression, epigenetic	8.80371e-05	0.00902115	Setd1a/Baz2a/Dnmt3a/Tnrc6c/Dicer1/Ago2/Phf2/Dot1l/Hdac4/Helz/Tnrc6b/L3mbtl1/Tet1/Kmt2d
GO:0021587	cerebellum morphogenesis	9.20182e-05	0.00902115	Cacna1a/Gli1/Pcnt/Lhx1/Nfix/Abl2/Abl1
GO:0043010	camera-type eye development	9.55597e-05	0.00902115	Chd7/Fat1/Acvr2b/Hipk2/Col4a1/Pou2f1/Gli3/Kmt2c/Rab11fip4/Pdgfrb/Notch2/Ephb2/Pcnt/Tenm3/Lhx1/Lamb2/Sdk2
GO:0001822	kidney development	9.63885e-05	0.00902115	Acvr2b/Pkd1/Gli3/Zbtb16/Pdgfrb/Notch3/Fmn1/Notch2/Pcnt/Lrp4/Dchs1/Lhx1/Lamb2/Notch1/Itgb3/Tshz3
GO:0021515	cell differentiation in spinal cord	9.86349e-05	0.00902115	Cacna1a/Ift172/Ighmbp2/Dicer1/Gli3/Lhx1
GO:0007044	cell-substrate junction assembly	0.000101857	0.00902115	Col16a1/Macf1/Plec/Fn1/Dst/Fmn1/Itgb3/Tns1/Abl1
GO:0034329	cell junction assembly	0.000104388	0.00902115	Col16a1/Macf1/Plec/Fn1/Cdh20/Dst/Fmn1/Vcl/Cgn/Itgb3/Tns1/Rapgef1/Abl1/Pard6b
GO:0061437	renal system vasculature development	0.000108148	0.00902115	Pdgfrb/Notch3/Notch2/Notch1/Itgb3
GO:0061440	kidney vasculature development	0.000108148	0.00902115	Pdgfrb/Notch3/Notch2/Notch1/Itgb3
GO:0001655	urogenital system development	0.000120054	0.00977586	Acvr2b/Pkd1/Col4a1/Gli3/Zbtb16/Pdgfrb/Notch3/Fmn1/Notch2/Ephb2/Pcnt/Lrp4/Dchs1/Lhx1/Lamb2/Notch1/Itgb3/Tshz3
GO:0031032	actomyosin structure organization	0.000134261	0.0103789	Arrb1/Ttn/Cdc42bpb/Pdgfrb/Eln/Myh9/Neb/Epb41/Myh14/Myo18a/Arap1/Cdc42bpa/Abl1
GO:0021522	spinal cord motor neuron differentiation	0.000135655	0.0103789	Cacna1a/Ift172/Ighmbp2/Dicer1/Gli3
GO:0021575	hindbrain morphogenesis	0.000136565	0.0103789	Cacna1a/Gli1/Pcnt/Lhx1/Nfix/Abl2/Abl1
GO:0007423	sensory organ development	0.00014007	0.0104139	Chd7/Fat1/Acvr2b/Hipk2/Col4a1/Pou2f1/Dicer1/Gli3/Kmt2c/Rab11fip4/Pdgfrb/Notch2/Ephb2/Pcnt/Tenm3/Dchs1/Frem2/Lhx1/Ntn1/Lamb2/Notch1/Ece1/Col5a1/Sdk2
GO:0048568	embryonic organ development	0.000148715	0.0108214	Chd7/Med12/Ift172/Gli1/Pkd1/Hipk2/Tnrc6c/Kmt2a/Hspg2/Gli3/Megf8/Pdgfrb/Notch2/Ephb2/Pcnt/Pax5/Lhx1/Ntn1/Vash1/Notch1/Zfp568
GO:0098742	cell-cell adhesion via plasma-membrane adhesion molecules	0.000189383	0.0134935	Celsr3/Igsf9b/Hmcn1/Palld/Ptprt/Cdh20/Pcdha9/Celsr2/Tenm3/Dchs1/Pcdhb16/Sdk2/Ntng2
GO:0018205	peptidyl-lysine modification	0.000197924	0.0138143	Nos1/Setd1a/Kmt2b/Baz2a/Tet3/Arrb1/Kmt2a/Setd1b/Dot1l/Trrap/Brpf3/Chd5/Hdac4/Ash1l/Pax5/Kmt2d/Brd4/Per1
GO:0060840	artery development	0.000207513	0.0141939	Chd7/Acvr2b/Gli3/Lrp1/Pdgfrb/Notch3/Zmiz1/Notch1/Notch4
GO:0034330	cell junction organization	0.000242415	0.0162561	Plekha7/Col16a1/Macf1/Plec/Fn1/Cdh20/Dst/Fmn1/Vcl/Cgn/Itgb3/Tns1/Rapgef1/Abl1/Pard6b
GO:0030326	embryonic limb morphogenesis	0.000311102	0.0200749	Chd7/Dicer1/Gli3/Zbtb16/Megf8/Notch2/Lrp4/Frem2/Notch1/Ece1
GO:0035113	embryonic appendage morphogenesis	0.000311102	0.0200749	Chd7/Dicer1/Gli3/Zbtb16/Megf8/Notch2/Lrp4/Frem2/Notch1/Ece1
GO:0061005	cell differentiation involved in kidney development	0.000330668	0.0209423	Gli3/Notch2/Lhx1/Lamb2/Notch1/Tshz3
GO:0007097	nuclear migration	0.000361241	0.022177	Syne2/Kif1a/Syne1/Ntn1/Cdc42bpa
GO:0048706	embryonic skeletal system development	0.000363133	0.022177	Med12/Xylt1/Hspg2/Gli3/Megf8/Pax5/Lhx1/Etl4/Col1a1
GO:0006342	chromatin silencing	0.000383163	0.0229898	Baz2a/Dnmt3a/Dicer1/Phf2/Dot1l/Tet1/Kmt2d
GO:0060537	muscle tissue development	0.000401673	0.0236849	Chd7/Gli1/Kdm6b/Col19a1/Hspg2/Dicer1/Hivep3/Flnb/Ttn/Pdgfrb/Ryr1/Hdac4/Eln/Neb/Myh14/Pax5/Notch1/Myh11/Bcl9l/Tshz3
GO:0007389	pattern specification process	0.000409726	0.0237502	Med12/Acvr2b/Ift172/Gli1/Hipk2/Kmt2a/Gli3/Ttn/Zbtb16/Megf8/Celsr2/Notch2/Lrp4/Dchs1/Lhx1/Notch1/Disp1/Reln/Atm
GO:0021953	central nervous system neuron differentiation	0.000451832	0.0251393	Cacna1a/Ift172/Ighmbp2/Dicer1/Gli3/Szt2/Plxna3/Chd5/Ephb2/Lhx1/Nfix/Sptbn4
GO:0060560	developmental growth involved in morphogenesis	0.000453815	0.0251393	Med12/Slit3/Fn1/Megf8/Plxna3/Fmn1/Vcl/Flrt1/Golga4/Lhx1/Ntn1/Lamb2/Notch1/Zfp568/Abl1
GO:0030900	forebrain development	0.000459308	0.0251393	Chd7/Gli1/Kdm6b/Syne2/Dicer1/Kif1a/Gli3/Szt2/Notch3/Plxna3/Chd5/Ephb2/Pcnt/Pax5/Lhx1/Notch1/Slc1a2/Reln
GO:0072006	nephron development	0.000464719	0.0251393	Gli3/Pdgfrb/Notch3/Fmn1/Notch2/Dchs1/Lhx1/Lamb2/Notch1/Itgb3
GO:0043931	ossification involved in bone maturation	0.000477276	0.0251393	Xylt1/Ryr1/Dchs1/Plxnb1
GO:0050879	multicellular organismal movement	0.000485145	0.0251393	Cacna1a/Hipk2/Itpr1/Map1a/Myh14/Tshz3
GO:0050881	musculoskeletal movement	0.000485145	0.0251393	Cacna1a/Hipk2/Itpr1/Map1a/Myh14/Tshz3
GO:0048844	artery morphogenesis	0.000518199	0.0264513	Chd7/Lrp1/Pdgfrb/Notch3/Zmiz1/Notch1/Notch4
GO:0021675	nerve development	0.000570784	0.0267743	Chd7/Nav2/Dicer1/Gli3/Plxna3/Ephb2/Rnf165
GO:0014706	striated muscle tissue development	0.00057729	0.0267743	Chd7/Gli1/Kdm6b/Col19a1/Hspg2/Dicer1/Hivep3/Flnb/Ttn/Pdgfrb/Ryr1/Hdac4/Eln/Neb/Myh14/Pax5/Notch1/Myh11/Bcl9l
GO:0043414	macromolecule methylation	0.000584196	0.0267743	Setd1a/Kmt2b/Baz2a/Tet3/Dnmt3a/Kmt2a/Setd1b/Dot1l/Kmt2c/Chd5/Ash1l/Pax5/Tet1/Kmt2d/Icmt
GO:0022604	regulation of cell morphogenesis	0.000584219	0.0267743	Cacna1a/Sipa1l1/Rreb1/Zswim8/Myo10/Syne1/Fn1/Megf8/Plxna3/Cul7/Ephb2/Myh9/Lrp4/Golga4/Epb41/Myh14/Ntn1/Arap1/Plxnb1/Itgb3/Reln/Bcl9l/Abl1
GO:0048705	skeletal system morphogenesis	0.000587767	0.0267743	Med12/Acvr2b/Pkd1/Ankrd11/Hspg2/Col11a2/Gli3/Megf8/Pdgfrb/Fmn1/Pax5/Lhx1/Col1a1
GO:0006816	calcium ion transport	0.000589374	0.0267743	Chd7/Cacna1a/Nos1/Pkd1/Itpr1/Oprd1/Nos1ap/Pdgfrb/Ryr1/Ank2/Itpr3/Stac2/Jak3/Cacna1i/Tpcn1/Itgb3/Abl1/Cacna1g
GO:0035909	aorta morphogenesis	0.000590917	0.0267743	Chd7/Lrp1/Pdgfrb/Notch1/Notch4
GO:0051647	nucleus localization	0.000590917	0.0267743	Syne2/Kif1a/Syne1/Ntn1/Cdc42bpa
GO:0060972	left/right pattern formation	0.000602813	0.0267743	Ift172/Megf8/Notch2/Notch1
GO:0070977	bone maturation	0.000602813	0.0267743	Xylt1/Ryr1/Dchs1/Plxnb1
GO:0099068	postsynapse assembly	0.000687563	0.030147	Sipa1l1/Ephb2/Lrp4/Reln/Ntng2
GO:0046578	regulation of Ras protein signal transduction	0.000741572	0.0318524	Trio/Arrb1/Dennd4b/Pdgfrb/Arhgef1/Notch2/Ephb2/Notch1/Abl2/Icmt/Arhgef12/Rapgef1/Abl1
GO:0042475	odontogenesis of dentin-containing tooth	0.000754399	0.0318524	Acvr2b/Ankrd11/Dicer1/Gli3/Dmp1/Lrp4/Nfic
GO:0045814	negative regulation of gene expression, epigenetic	0.000754399	0.0318524	Baz2a/Dnmt3a/Dicer1/Phf2/Dot1l/Tet1/Kmt2d
GO:0002009	morphogenesis of an epithelium	0.000764245	0.0318746	Celsr3/Med12/Ift172/Pkd1/Col4a1/Dicer1/Rreb1/Gli3/Megf8/Fmn1/Vcl/Notch2/Dchs1/Frem2/Lhx1/Ntn1/Notch1/Zfp568/Col5a1/Abl2/Notch4/Abl1
GO:0048593	camera-type eye morphogenesis	0.000793001	0.0326755	Fat1/Hipk2/Pou2f1/Gli3/Notch2/Ephb2/Tenm3/Lhx1/Sdk2
GO:0007492	endoderm development	0.000861356	0.0350695	Med12/Tnrc6c/Fn1/Lhx1/Notch1/Col5a1
GO:0060348	bone development	0.000873368	0.0351202	Ift172/Ankrd11/Xylt1/Hspg2/Gli3/Megf8/Ryr1/Nbeal2/Notch2/Dchs1/Plxnb1/Col1a1
GO:0042476	odontogenesis	0.000883139	0.0351202	Acvr2b/Ankrd11/Dicer1/Gli3/Dmp1/Lrp4/Nfic/Col1a1
GO:0002011	morphogenesis of an epithelial sheet	0.000957995	0.0372945	Rreb1/Megf8/Notch2/Notch1/Zfp568/Col5a1
GO:0060538	skeletal muscle organ development	0.000959624	0.0372945	Col19a1/Hivep3/Flnb/Ryr1/Hdac4/Eln/Myh14/Pax5/Notch1/Disp1/Bcl9l
GO:0001701	in utero embryonic development	0.00100536	0.0386328	Chd7/Pkd1/Ankrd11/Gli3/Ttn/Pdgfrb/Notch2/Zmiz1/Pcnt/Myh9/Ints1/Vash1/Notch1/Tie1/Tet1/Zfp568/Kmt2d/Icmt/Brd4/Tshz3
GO:0007369	gastrulation	0.00101882	0.0386762	Acvr2b/Kdm6b/Tnrc6c/Macf1/Fn1/Megf8/Lhx1/Phldb1/Zfp568/Col5a1
GO:0009611	response to wounding	0.00103053	0.0386762	Pik3cd/Proz/Gli1/Neat1/Xylt1/Macf1/Dicer1/Plec/Rreb1/Fn1/Dst/Nbeal2/Notch2/Vash1/Lamb2/Col1a1/Col5a1/Itgb3/Slc1a2
GO:0010769	regulation of cell morphogenesis involved in differentiation	0.0010425	0.0386762	Cacna1a/Sipa1l1/Rreb1/Zswim8/Syne1/Fn1/Megf8/Plxna3/Cul7/Ephb2/Lrp4/Golga4/Ntn1/Plxnb1/Itgb3/Reln/Abl1
GO:0032835	glomerulus development	0.00106276	0.0386762	Pdgfrb/Notch3/Notch2/Lamb2/Notch1/Itgb3
GO:0009952	anterior/posterior pattern specification	0.00106303	0.0386762	Med12/Acvr2b/Hipk2/Kmt2a/Gli3/Ttn/Zbtb16/Celsr2/Lhx1/Notch1/Atm
GO:0051924	regulation of calcium ion transport	0.00110398	0.0397432	Chd7/Cacna1a/Nos1/Itpr1/Oprd1/Nos1ap/Pdgfrb/Ank2/Stac2/Jak3/Itgb3/Abl1/Cacna1g
GO:0048799	animal organ maturation	0.00111781	0.0397504	Xylt1/Ryr1/Dchs1/Plxnb1
GO:0021545	cranial nerve development	0.00119586	0.0397504	Chd7/Nav2/Gli3/Plxna3/Ephb2
GO:1903053	regulation of extracellular matrix organization	0.00119586	0.0397504	Phldb1/Notch1/Abl2/Itgb3/Abl1
GO:0048592	eye morphogenesis	0.00120348	0.0397504	Fat1/Hipk2/Pou2f1/Gli3/Notch2/Ephb2/Tenm3/Lhx1/Col5a1/Sdk2
GO:0048562	embryonic organ morphogenesis	0.00120695	0.0397504	Chd7/Med12/Ift172/Gli1/Hipk2/Hspg2/Gli3/Megf8/Notch2/Ephb2/Pax5/Lhx1/Ntn1/Notch1
GO:0007270	neuron-neuron synaptic transmission	0.00120878	0.0397504	Camk4/Cacna1a/Dlgap2
GO:0038063	collagen-activated tyrosine kinase receptor signaling pathway	0.00120878	0.0397504	Col4a2/Col4a1/Col1a1
GO:0070986	left/right axis specification	0.00120878	0.0397504	Ift172/Notch2/Notch1
GO:0072102	glomerulus morphogenesis	0.00120878	0.0397504	Pdgfrb/Notch3/Notch2
GO:0035137	hindlimb morphogenesis	0.00135754	0.043371	Chd7/Dicer1/Zbtb16/Fmn1/Notch1
GO:0021537	telencephalon development	0.00136245	0.043371	Chd7/Kdm6b/Syne2/Dicer1/Gli3/Szt2/Plxna3/Ephb2/Pcnt/Pax5/Lhx1/Slc1a2/Reln
GO:0048708	astrocyte differentiation	0.0013654	0.043371	Ttbk1/Lrp1/Nfix/Lamb2/Notch1/Abl2/Abl1
GO:0070372	regulation of ERK1 and ERK2 cascade	0.00136961	0.043371	Arrb1/Fn1/Pdgfrb/Notch2/Ephb2/Abca7/Wnk2/Lmtk2/Notch1/Tie1/Ece1/Abl2/Itgb3/Rapgef1/Abl1
GO:0030509	BMP signaling pathway	0.00139461	0.0435551	Numa1/Acvr2b/Hipk2/Megf8/Notch2/Lrp4/Notch1/Rnf165/Abl1
GO:0032259	methylation	0.0014009	0.0435551	Setd1a/Kmt2b/Baz2a/Tet3/Dnmt3a/Kmt2a/Setd1b/Dot1l/Kmt2c/Chd5/Prdm11/Ash1l/Pax5/Tet1/Kmt2d/Icmt
GO:0046777	protein autophosphorylation	0.00141976	0.0436757	Cad/Stk10/Map3k9/Pdgfrb/Tnks1bp1/Wnk2/Lmtk2/Sik2/Abl2/Tnk2/Brd4/Atm/Abl1
GO:0048008	platelet-derived growth factor receptor signaling pathway	0.00143032	0.0436757	Lrp1/Pdgfrb/Abl2/Itgb3/Rapgef1/Abl1
GO:0001503	ossification	0.00149942	0.0453806	Acvr2b/Gli1/Xylt1/Hspg2/Gli3/Zbtb16/Sbno2/Ryr1/Hdac4/Dmp1/Lrp4/Dchs1/Notch1/Plxnb1/Col1a1/Icmt
GO:0003382	epithelial cell morphogenesis	0.00153479	0.0460438	Fat1/Palld/Flnb/Cgn/Notch4
GO:0030855	epithelial cell differentiation	0.00155748	0.0463182	Fat1/Numa1/Acvr2b/Gli1/Kdm6b/Safb2/Palld/Dicer1/Flnb/Fosl2/Cgn/Cul7/Notch2/Lhx1/Lamb2/Notch1/Exph5/Abl2/Notch4/Rapgef1/Abl1
GO:0051480	regulation of cytosolic calcium ion concentration	0.00158087	0.0466085	Chd7/Cacna1a/Nos1/Pkd1/Itpr1/Ryr1/Ank2/Itpr3/Jak3/Kcnk3/Cacna1i/Abl2/Itgb3/Abl1/Cacna1g
GO:0010770	positive regulation of cell morphogenesis involved in differentiation	0.0016488	0.0481956	Rreb1/Fn1/Megf8/Plxna3/Cul7/Golga4/Ntn1/Plxnb1/Itgb3/Reln/Abl1
GO:0050770	regulation of axonogenesis	0.00172461	0.0496759	Cacna1a/Sipa1l1/Zswim8/Fn1/Megf8/Plxna3/Ephb2/Lrp4/Golga4/Ntn1/Plxnb1/Abl1
GO:0021696	cerebellar cortex morphogenesis	0.00172849	0.0496759	Cacna1a/Gli1/Pcnt/Lhx1/Nfix
GO:0060041	retina development in camera-type eye	0.00186174	0.0526211	Chd7/Acvr2b/Hipk2/Col4a1/Rab11fip4/Pdgfrb/Lhx1/Lamb2/Sdk2
GO:0060402	calcium ion transport into cytosol	0.00186174	0.0526211	Chd7/Itpr1/Ryr1/Ank2/Itpr3/Cacna1i/Itgb3/Abl1/Cacna1g
GO:0043588	skin development	0.00187748	0.0526311	Numa1/Palld/Dicer1/Flnb/Fosl2/Ryr1/Ash1l/Lrp4/Notch1/Exph5/Col1a1/Col5a1
GO:0070588	calcium ion transmembrane transport	0.00195441	0.0534349	Chd7/Cacna1a/Pkd1/Itpr1/Nos1ap/Ryr1/Ank2/Itpr3/Stac2/Tpcn1/Itgb3/Abl1/Cacna1g
GO:0002064	epithelial cell development	0.00195799	0.0534349	Fat1/Palld/Dicer1/Flnb/Fosl2/Cgn/Notch2/Lamb2/Notch1/Exph5/Notch4/Rapgef1
GO:0071772	response to BMP	0.00196865	0.0534349	Numa1/Acvr2b/Hipk2/Megf8/Notch2/Lrp4/Notch1/Rnf165/Abl1
GO:0071773	cellular response to BMP stimulus	0.00196865	0.0534349	Numa1/Acvr2b/Hipk2/Megf8/Notch2/Lrp4/Notch1/Rnf165/Abl1
GO:0070374	positive regulation of ERK1 and ERK2 cascade	0.00204131	0.0549708	Arrb1/Pdgfrb/Notch2/Ephb2/Abca7/Lmtk2/Notch1/Tie1/Abl2/Itgb3/Rapgef1/Abl1
GO:0007169	transmembrane receptor protein tyrosine kinase signaling pathway	0.00207965	0.0551083	Col4a2/Irs1/Col4a1/Soga1/Gigyf1/Sipa1l1/Ptprt/Lrp1/Pdgfrb/Flrt1/Ephb2/Mvb12b/Lmtk2/Sik2/Notch1/Col1a1/Abl2/Anks1/Itgb3/Rapgef1/Abl1
GO:0035791	platelet-derived growth factor receptor-beta signaling pathway	0.0021431	0.0551083	Lrp1/Pdgfrb/Abl1
GO:0038065	collagen-activated signaling pathway	0.0021431	0.0551083	Col4a2/Col4a1/Col1a1
GO:0060211	regulation of nuclear-transcribed mRNA poly(A) tail shortening	0.0021431	0.0551083	Tnrc6c/Ago2/Tnrc6b
GO:0060213	positive regulation of nuclear-transcribed mRNA poly(A) tail shortening	0.0021431	0.0551083	Tnrc6c/Ago2/Tnrc6b
GO:0072109	glomerular mesangium development	0.0021431	0.0551083	Pdgfrb/Notch1/Itgb3
GO:0006935	chemotaxis	0.00220652	0.0563156	Celsr3/Ablim1/Pik3cd/Slit3/Gli3/Zswim8/Fn1/Megf8/Pdgfrb/Plxna3/Ephb2/Lmtk2/Lhx1/Ntn1/Lamb2/Notch1/Plxnb1/Itgb3/Reln/Rnf165
GO:0048675	axon extension	0.00231911	0.0584932	Slit3/Fn1/Megf8/Plxna3/Vcl/Golga4/Ntn1/Lamb2/Abl1
GO:0042330	taxis	0.00232605	0.0584932	Celsr3/Ablim1/Pik3cd/Slit3/Gli3/Zswim8/Fn1/Megf8/Pdgfrb/Plxna3/Ephb2/Lmtk2/Lhx1/Ntn1/Lamb2/Notch1/Plxnb1/Itgb3/Reln/Rnf165
GO:0070838	divalent metal ion transport	0.00236855	0.0588519	Chd7/Cacna1a/Nos1/Pkd1/Itpr1/Oprd1/Nos1ap/Pdgfrb/Ryr1/Ank2/Itpr3/Stac2/Jak3/Cacna1i/Tpcn1/Itgb3/Abl1/Cacna1g
GO:0070371	ERK1 and ERK2 cascade	0.00238483	0.0588519	Arrb1/Fn1/Pdgfrb/Notch2/Ephb2/Abca7/Wnk2/Lmtk2/Notch1/Tie1/Ece1/Abl2/Itgb3/Rapgef1/Abl1
GO:0072511	divalent inorganic cation transport	0.00243683	0.0588519	Chd7/Cacna1a/Nos1/Pkd1/Itpr1/Oprd1/Nos1ap/Pdgfrb/Ryr1/Ank2/Itpr3/Stac2/Jak3/Cacna1i/Tpcn1/Itgb3/Abl1/Cacna1g
GO:0030111	regulation of Wnt signaling pathway	0.00244405	0.0588519	Med12/Gli1/Trabd2b/Mcc/Macf1/Gli3/Lrp1/Lrp4/Wnk2/Notch1/Col1a1/Abl2/Rapgef1/Abl1
GO:0043967	histone H4 acetylation	0.00244781	0.0588519	Arrb1/Kmt2a/Trrap/Chd5/Brd4/Per1
GO:0050808	synapse organization	0.00245743	0.0588519	Cacna1a/Igsf9b/Utrn/Col4a1/Palld/Sipa1l1/Flrt1/Ephb2/Lrp4/Chd4/Ntn1/Lamb2/Pcdhb16/Dctn1/Abl2/Sdk2/Reln/Ntng2/Abl1
GO:0007519	skeletal muscle tissue development	0.00246077	0.0588519	Col19a1/Hivep3/Flnb/Ryr1/Hdac4/Eln/Myh14/Pax5/Notch1/Bcl9l
GO:0001525	angiogenesis	0.00251557	0.0593326	Col4a2/Stab1/Hipk2/Col4a1/Hspg2/Dicer1/Ago2/Fn1/Pdgfrb/Notch3/Notch2/Ephb2/Myh9/Vash1/Notch1/Tie1/Robo4/Itgb3/Notch4/Abl1
GO:0007264	small GTPase mediated signal transduction	0.00251557	0.0593326	Trio/Arrb1/Arhgap32/Sipa1l1/Arhgap31/Dennd4b/Pdgfrb/Ksr2/Arhgef1/Notch2/Ephb2/Ntn1/Notch1/Abl2/Icmt/Reln/Arhgef12/Cdc42bpa/Rapgef1/Abl1
GO:0001706	endoderm formation	0.00255544	0.0598603	Tnrc6c/Fn1/Lhx1/Col5a1
GO:0042733	embryonic digit morphogenesis	0.00265977	0.0614621	Gli3/Zbtb16/Lrp4/Frem2/Notch1/Ece1
GO:0048146	positive regulation of fibroblast proliferation	0.00265977	0.0614621	Fosl2/Kmt2c/Fn1/Pdgfrb/Zmiz1/Itgb3
GO:0007219	Notch signaling pathway	0.00270481	0.0616462	Spen/Ift172/Arrb1/Dicer1/Notch3/Notch2/Zmiz1/Mib2/Notch1/Notch4
GO:0035278	miRNA mediated inhibition of translation	0.00273983	0.0616462	Tnrc6c/Ago2/Tnrc6b
GO:0040033	negative regulation of translation, ncRNA-mediated	0.00273983	0.0616462	Tnrc6c/Ago2/Tnrc6b
GO:0045974	regulation of translation, ncRNA-mediated	0.00273983	0.0616462	Tnrc6c/Ago2/Tnrc6b
GO:0030534	adult behavior	0.00283389	0.0628382	Chd7/Cacna1a/Nos1/Hipk2/Zfhx2/Oprd1/Pax5/Abl2/Sptbn4/Slc1a2
GO:0007204	positive regulation of cytosolic calcium ion concentration	0.00284617	0.0628382	Chd7/Cacna1a/Pkd1/Itpr1/Ryr1/Ank2/Itpr3/Jak3/Cacna1i/Abl2/Itgb3/Abl1/Cacna1g
GO:0060562	epithelial tube morphogenesis	0.00284793	0.0628382	Med12/Ift172/Pkd1/Col4a1/Dicer1/Gli3/Megf8/Fmn1/Notch2/Dchs1/Lhx1/Ntn1/Notch1/Abl2/Notch4/Abl1
GO:0035264	multicellular organism growth	0.00293731	0.0643949	Chd7/Ankrd11/Dicer1/Kmt2c/Notch2/Pcnt/Abl2/Sptbn4/Slc1a2/Icmt/Atm
GO:0007628	adult walking behavior	0.00297498	0.0648054	Chd7/Cacna1a/Hipk2/Abl2/Sptbn4
GO:0030178	negative regulation of Wnt signaling pathway	0.00316813	0.068576	Med12/Gli1/Trabd2b/Mcc/Gli3/Lrp1/Lrp4/Notch1/Rapgef1
GO:1905114	cell surface receptor signaling pathway involved in cell-cell signaling	0.00324392	0.0697749	Celsr3/Med12/Igsf9b/Gli1/Trabd2b/Mcc/Macf1/Gli3/Syne1/Lrp1/Celsr2/Lrp4/Wnk2/Notch1/Col1a1/Abl2/Reln/Bcl9l/Rapgef1/Abl1
GO:0090659	walking behavior	0.00328621	0.0702428	Chd7/Cacna1a/Hipk2/Abl2/Sptbn4
GO:0060401	cytosolic calcium ion transport	0.00333078	0.070652	Chd7/Itpr1/Ryr1/Ank2/Itpr3/Cacna1i/Itgb3/Abl1/Cacna1g
GO:0006929	substrate-dependent cell migration	0.00337831	0.070652	Fn1/Ntn1/Abl2/Anks1
GO:0007216	G protein-coupled glutamate receptor signaling pathway	0.00342931	0.070652	Grid2ip/Grik3/Dagla
GO:0010457	centriole-centriole cohesion	0.00342931	0.070652	Cep250/Syne2/Dctn1
GO:0060973	cell migration involved in heart development	0.00342931	0.070652	Pdgfrb/Dchs1/Notch1
GO:0061430	bone trabecula morphogenesis	0.00342931	0.070652	Sbno2/Plxnb1/Col1a1
GO:0007416	synapse assembly	0.00355509	0.0728048	Cacna1a/Sipa1l1/Flrt1/Ephb2/Lrp4/Ntn1/Pcdhb16/Sdk2/Reln/Ntng2
GO:0061448	connective tissue development	0.00368055	0.0746413	Zfp516/Pkd1/Hspg2/Dicer1/Col11a2/Gli3/Zbtb16/Pdgfrb/Notch1/Col1a1/Col5a1/Itgb3
GO:0061326	renal tubule development	0.00368841	0.0746413	Col4a1/Gli3/Fmn1/Notch2/Dchs1/Lhx1/Notch1
GO:0010810	regulation of cell-substrate adhesion	0.00375784	0.0755989	Utrn/Col16a1/Macf1/Rreb1/Fn1/Fmn1/Dmp1/Notch1/Col1a1/Itgb3/Abl1
GO:0035116	embryonic hindlimb morphogenesis	0.00385027	0.0770054	Chd7/Dicer1/Zbtb16/Notch1
GO:0016055	Wnt signaling pathway	0.00387752	0.0770996	Celsr3/Med12/Gli1/Trabd2b/Mcc/Macf1/Gli3/Lrp1/Celsr2/Lrp4/Wnk2/Notch1/Col1a1/Abl2/Bcl9l/Rapgef1/Abl1
GO:0051209	release of sequestered calcium ion into cytosol	0.00392789	0.0776496	Chd7/Itpr1/Ryr1/Ank2/Itpr3/Itgb3/Abl1
GO:0070988	demethylation	0.00397786	0.0781856	Tet3/Kdm5c/Kdm6b/Phf2/Tet1
GO:0198738	cell-cell signaling by wnt	0.00409536	0.0800351	Celsr3/Med12/Gli1/Trabd2b/Mcc/Macf1/Gli3/Lrp1/Celsr2/Lrp4/Wnk2/Notch1/Col1a1/Abl2/Bcl9l/Rapgef1/Abl1
GO:0060841	venous blood vessel development	0.00421572	0.081919	Acvr2b/Notch1/Notch4
GO:0061383	trabecula morphogenesis	0.00436009	0.0842458	Chd7/Sbno2/Notch1/Plxnb1/Col1a1
GO:0048813	dendrite morphogenesis	0.00441494	0.0843525	Cacna1a/Sipa1l1/Syne1/Fmn1/Cul7/Celsr2/Ephb2/Lrp4/Abl2/Reln
GO:1902275	regulation of chromatin organization	0.00441494	0.0843525	Nos1/Setd1a/Kmt2b/Arrb1/Kmt2a/Phf2/Pax5/Lpin1/Tet1/Atm
GO:0051283	negative regulation of sequestering of calcium ion	0.00444203	0.0843986	Chd7/Itpr1/Ryr1/Ank2/Itpr3/Itgb3/Abl1
GO:0021549	cerebellum development	0.00500545	0.0935445	Cacna1a/Gli1/Pcnt/Lhx1/Nfix/Abl2/Abl1
GO:0051282	regulation of sequestering of calcium ion	0.00500545	0.0935445	Chd7/Itpr1/Ryr1/Ank2/Itpr3/Itgb3/Abl1
GO:0072009	nephron epithelium development	0.00500545	0.0935445	Gli3/Fmn1/Notch2/Dchs1/Lhx1/Lamb2/Notch1
GO:0014808	release of sequestered calcium ion into cytosol by sarcoplasmic reticulum	0.00510284	0.0938263	Chd7/Ryr1/Ank2
GO:0080182	histone H3-K4 trimethylation	0.00510284	0.0938263	Kmt2b/Tet3/Kmt2a
GO:1903514	release of sequestered calcium ion into cytosol by endoplasmic reticulum	0.00510284	0.0938263	Chd7/Ryr1/Ank2
GO:0010811	positive regulation of cell-substrate adhesion	0.00522624	0.0955814	Utrn/Col16a1/Rreb1/Fn1/Fmn1/Dmp1/Itgb3/Abl1
GO:0048565	digestive tract development	0.00530653	0.096023	Acvr2b/Ift172/Dicer1/Gli3/Megf8/Dchs1/Notch1
GO:0051208	sequestering of calcium ion	0.00530653	0.096023	Chd7/Itpr1/Ryr1/Ank2/Itpr3/Itgb3/Abl1
GO:0010959	regulation of metal ion transport	0.00536256	0.0965262	Chd7/Cacna1a/Nos1/Itpr1/Oprd1/Nos1ap/Pdgfrb/Ank2/Stac2/Wnk2/Jak3/Itgb3/Sptbn4/Per1/Abl1/Cacna1g
GO:0003007	heart morphogenesis	0.00545465	0.0974751	Chd7/Ift172/Slit3/Dicer1/Ttn/Megf8/Ryr1/Notch2/Zmiz1/Dchs1/Notch1/Col5a1
GO:0007163	establishment or maintenance of cell polarity	0.00552377	0.0974751	Fat1/Numa1/Pkd1/Syne2/Macf1/Myh9/Myo18a/Mtcl1/Dctn1/Pard3b/Pard6b
GO:0035850	epithelial cell differentiation involved in kidney development	0.00552929	0.0974751	Notch2/Lhx1/Lamb2/Notch1
GO:0072210	metanephric nephron development	0.00552929	0.0974751	Pdgfrb/Fmn1/Lhx1/Lamb2
GO:0001704	formation of primary germ layer	0.00560744	0.0978174	Kdm6b/Tnrc6c/Macf1/Fn1/Lhx1/Col5a1
GO:0030216	keratinocyte differentiation	0.00560744	0.0978174	Numa1/Palld/Flnb/Fosl2/Notch1/Exph5
GO:0001954	positive regulation of cell-matrix adhesion	0.00566311	0.0978174	Utrn/Col16a1/Fmn1/Itgb3/Abl1
GO:0007528	neuromuscular junction development	0.00566311	0.0978174	Utrn/Col4a1/Lrp4/Lamb2/Dctn1
GO:0048704	embryonic skeletal system morphogenesis	0.00599675	0.102141	Med12/Hspg2/Gli3/Megf8/Pax5/Lhx1
GO:0050890	cognition	0.00602188	0.102141	Adcy1/Camk4/Chd7/Kmt2b/Kmt2a/Ttbk1/Map1a/Dop1b/Itpr3/Ephb2/Shc3/Abca7/Abl2/Reln
GO:0008090	retrograde axonal transport	0.00609403	0.102141	Kif1a/Dst/Map1a
GO:0034505	tooth mineralization	0.00609403	0.102141	Dicer1/Dmp1/Col1a1
GO:1900151	regulation of nuclear-transcribed mRNA catabolic process, deadenylation-dependent decay	0.00609403	0.102141	Tnrc6c/Ago2/Tnrc6b
GO:1900153	positive regulation of nuclear-transcribed mRNA catabolic process, deadenylation-dependent decay	0.00609403	0.102141	Tnrc6c/Ago2/Tnrc6b
GO:0048167	regulation of synaptic plasticity	0.00616479	0.102141	Nos1/Kmt2a/Sipa1l1/Grid2ip/Map1a/Itpr3/Ephb2/Kcnb1/Reln/Tshz3/Abl1
GO:0030513	positive regulation of BMP signaling pathway	0.00618222	0.102141	Numa1/Notch2/Notch1/Rnf165
GO:0048013	ephrin receptor signaling pathway	0.00618222	0.102141	Sipa1l1/Ephb2/Notch1/Anks1
GO:0060541	respiratory system development	0.00639098	0.104816	Chd7/Numa1/Acvr2b/Gli1/Pou2f1/Dicer1/Gli3/Pdgfrb/Notch1/Disp1/Tshz3
GO:0001656	metanephros development	0.0064054	0.104816	Gli3/Pdgfrb/Fmn1/Lhx1/Lamb2/Tshz3
GO:1990138	neuron projection extension	0.00662152	0.107831	Slit3/Fn1/Megf8/Plxna3/Vcl/Flrt1/Golga4/Ntn1/Lamb2/Abl1
GO:0071695	anatomical structure maturation	0.00665275	0.107831	Cacna1a/Xylt1/Ryr1/Dchs1/Notch1/Plxnb1/Abl2/Anks1/Sptbn4
GO:0072073	kidney epithelium development	0.00700936	0.113076	Gli3/Fmn1/Notch2/Dchs1/Lhx1/Lamb2/Notch1/Tshz3
GO:0010842	retina layer formation	0.00719227	0.114834	Hipk2/Lhx1/Sdk2
GO:0006305	DNA alkylation	0.0072191	0.114834	Baz2a/Tet3/Dnmt3a/Kmt2a/Tet1
GO:0006306	DNA methylation	0.0072191	0.114834	Baz2a/Tet3/Dnmt3a/Kmt2a/Tet1
GO:0090596	sensory organ morphogenesis	0.00760388	0.119816	Chd7/Fat1/Hipk2/Pou2f1/Gli3/Notch2/Ephb2/Tenm3/Lhx1/Ntn1/Col5a1/Sdk2
GO:0010001	glial cell differentiation	0.00762141	0.119816	Med12/Dicer1/Gli3/Ttbk1/Lrp1/Nfix/Lamb2/Notch1/Abl2/Reln/Abl1
GO:0060071	Wnt signaling pathway, planar cell polarity pathway	0.00763739	0.119816	Celsr3/Med12/Abl2/Abl1
GO:0001736	establishment of planar polarity	0.00779797	0.121223	Celsr3/Med12/Dchs1/Abl2/Abl1
GO:0007164	establishment of tissue polarity	0.00779797	0.121223	Celsr3/Med12/Dchs1/Abl2/Abl1
GO:0048754	branching morphogenesis of an epithelial tube	0.00786585	0.121725	Pkd1/Col4a1/Dicer1/Gli3/Dchs1/Lhx1/Notch1/Notch4/Abl1
GO:0022037	metencephalon development	0.00822748	0.126179	Cacna1a/Gli1/Pcnt/Lhx1/Nfix/Abl2/Abl1
GO:0032092	positive regulation of protein binding	0.00822748	0.126179	Pkd1/Hipk2/Arrb1/Lrp1/Epb41/Abl2/Abl1
GO:0001946	lymphangiogenesis	0.00840018	0.127683	Acvr2b/Pkd1/Vash1
GO:0033622	integrin activation	0.00840018	0.127683	Col16a1/Fn1/Piezo1
GO:0010259	multicellular organism aging	0.00844258	0.127759	Slc1a2/Icmt/Rnf165/Atm
GO:0009953	dorsal/ventral pattern formation	0.00875726	0.131359	Ift172/Gli1/Gli3/Lrp4/Lhx1/Disp1
GO:0030510	regulation of BMP signaling pathway	0.00875726	0.131359	Numa1/Hipk2/Notch2/Notch1/Rnf165/Abl1
GO:0051057	positive regulation of small GTPase mediated signal transduction	0.00905104	0.135173	Arrb1/Pdgfrb/Notch2/Notch1/Reln
GO:0016573	histone acetylation	0.00921789	0.137066	Nos1/Arrb1/Kmt2a/Trrap/Brpf3/Chd5/Brd4/Per1
GO:0090175	regulation of establishment of planar polarity	0.00930137	0.137709	Celsr3/Med12/Abl2/Abl1
GO:0055123	digestive system development	0.00958143	0.139772	Acvr2b/Ift172/Dicer1/Gli3/Megf8/Dchs1/Notch1
GO:0000289	nuclear-transcribed mRNA poly(A) tail shortening	0.00972001	0.139772	Tnrc6c/Ago2/Tnrc6b
GO:0033688	regulation of osteoblast proliferation	0.00972001	0.139772	Plxnb1/Itgb3/Abl1
GO:0036303	lymph vessel morphogenesis	0.00972001	0.139772	Acvr2b/Pkd1/Vash1
GO:0061298	retina vasculature development in camera-type eye	0.00972001	0.139772	Acvr2b/Col4a1/Pdgfrb
GO:0035904	aorta development	0.00972683	0.139772	Chd7/Lrp1/Pdgfrb/Notch1/Notch4
GO:1904888	cranial skeletal system development	0.00972683	0.139772	Med12/Gli3/Megf8/Pax5/Lhx1
GO:0060021	roof of mouth development	0.00985181	0.140976	Chd7/Acvr2b/Ift172/Col11a2/Gli3/Ephb2
GO:0001881	receptor recycling	0.0102151	0.144362	Tbc1d16/Lmtk2/Arap1/Ece1
GO:0043124	negative regulation of I-kappaB kinase/NF-kappaB signaling	0.0102151	0.144362	Otud7a/Ash1l/Per1/Abl1
GO:0045104	intermediate filament cytoskeleton organization	0.0102151	0.144362	Macf1/Plec/Dst/Tchh
GO:0045785	positive regulation of cell adhesion	0.0103941	0.146249	Utrn/Col16a1/Rreb1/Gli3/Myo10/Zbtb16/Fn1/Piezo1/Fmn1/Dmp1/Zmiz1/Jak3/Itgb3/Atm/Abl1
GO:0072080	nephron tubule development	0.0104341	0.146249	Gli3/Fmn1/Notch2/Dchs1/Lhx1/Notch1
GO:0042060	wound healing	0.0105398	0.146951	Pik3cd/Proz/Macf1/Dicer1/Plec/Rreb1/Fn1/Dst/Nbeal2/Notch2/Col1a1/Col5a1/Itgb3
GO:0097553	calcium ion transmembrane import into cytosol	0.0105702	0.146951	Chd7/Itpr1/Ryr1/Ank2/Itpr3/Itgb3/Abl1
GO:0050804	modulation of chemical synaptic transmission	0.0107726	0.148266	Adcy1/Cacna1a/Nos1/Igsf9b/Kmt2a/Sipa1l1/Syne1/Dlgap2/Grid2ip/Map1a/Itpr3/Grik3/Ephb2/Kcnc3/Kcnb1/Reln/Ntng2/Tshz3/Abl1
GO:0055001	muscle cell development	0.0107903	0.148266	Dicer1/Ttn/Pdgfrb/Ryr1/Ank2/Hdac4/Neb/Notch1/Myh11
GO:0042063	gliogenesis	0.010838	0.148266	Med12/Syne2/Dicer1/Gli3/Ttbk1/Fn1/Lrp1/Nfix/Lamb2/Notch1/Abl2/Reln/Abl1
GO:0008360	regulation of cell shape	0.0109545	0.148266	Myo10/Fn1/Plxna3/Myh9/Epb41/Myh14/Arap1/Plxnb1
GO:0099177	regulation of trans-synaptic signaling	0.0109992	0.148266	Adcy1/Cacna1a/Nos1/Igsf9b/Kmt2a/Sipa1l1/Syne1/Dlgap2/Grid2ip/Map1a/Itpr3/Grik3/Ephb2/Kcnc3/Kcnb1/Reln/Ntng2/Tshz3/Abl1
GO:0007215	glutamate receptor signaling pathway	0.0110404	0.148266	Grid2ip/Grik3/Ephb2/Dagla/Kcnb1/Reln
GO:0003181	atrioventricular valve morphogenesis	0.0111537	0.148266	Slit3/Dchs1/Notch1
GO:0021602	cranial nerve morphogenesis	0.0111537	0.148266	Gli3/Plxna3/Ephb2
GO:0055003	cardiac myofibril assembly	0.0111537	0.148266	Ttn/Pdgfrb/Neb
GO:0021695	cerebellar cortex development	0.0111809	0.148266	Cacna1a/Gli1/Pcnt/Lhx1/Nfix
GO:0045103	intermediate filament-based process	0.011185	0.148266	Macf1/Plec/Dst/Tchh
GO:0048483	autonomic nervous system development	0.011185	0.148266	Nav2/Fn1/Plxna3/Kif26a
GO:0018393	internal peptidyl-lysine acetylation	0.0114241	0.150383	Nos1/Arrb1/Kmt2a/Trrap/Brpf3/Chd5/Brd4/Per1
GO:0007265	Ras protein signal transduction	0.0114326	0.150383	Trio/Arrb1/Arhgap32/Dennd4b/Pdgfrb/Ksr2/Arhgef1/Notch2/Ephb2/Ntn1/Notch1/Abl2/Icmt/Arhgef12/Rapgef1/Abl1
GO:0006338	chromatin remodeling	0.0116312	0.152408	Chd7/Setd1a/Baz2a/Kdm6b/Chd5/Hdac4/Srcap
GO:0006475	internal protein amino acid acetylation	0.0124076	0.161617	Nos1/Arrb1/Kmt2a/Trrap/Brpf3/Chd5/Brd4/Per1
GO:1903829	positive regulation of cellular protein localization	0.0124285	0.161617	Camk4/Numa1/Cep250/Gli3/Sorl1/Lrp1/Map1a/Ephb2/Lrp4/Stac2/Epb41/Mtcl1/Kcnb1
GO:0003171	atrioventricular valve development	0.0127029	0.162437	Slit3/Dchs1/Notch1
GO:0008045	motor neuron axon guidance	0.0127029	0.162437	Plxna3/Lhx1/Rnf165
GO:0033687	osteoblast proliferation	0.0127029	0.162437	Plxnb1/Itgb3/Abl1
GO:0070296	sarcoplasmic reticulum calcium ion transport	0.0127029	0.162437	Chd7/Ryr1/Ank2
GO:1904377	positive regulation of protein localization to cell periphery	0.0127765	0.162437	Numa1/Lrp1/Ephb2/Stac2/Epb41
GO:2000179	positive regulation of neural precursor cell proliferation	0.0127765	0.162437	Setd1a/Gli1/Gli3/Lhx1/Notch1
GO:0031056	regulation of histone modification	0.012922	0.163678	Nos1/Kmt2b/Arrb1/Kmt2a/Pax5/Lpin1/Tet1/Atm
GO:0002521	leukocyte differentiation	0.0131691	0.166194	Camk4/Chd7/Pou2f2/Sh3pxd2a/Gon4l/Dicer1/Gli3/Zbtb16/Sbno2/Notch2/Zmiz1/Jak3/Abl2/Cbfa2t3/Itgb3/Atm/Abl1
GO:0007568	aging	0.01347	0.169366	Mnt/Zmiz1/Pax5/Vash1/Slc1a2/Icmt/Rnf165/Atm/Abl1
GO:0021533	cell differentiation in hindbrain	0.0143689	0.1784	Cacna1a/Lhx1/Nfix
GO:0045815	positive regulation of gene expression, epigenetic	0.0143689	0.1784	Setd1a/Phf2/Tet1
GO:0003179	heart valve morphogenesis	0.0144434	0.1784	Slit3/Notch2/Dchs1/Notch1
GO:0010517	regulation of phospholipase activity	0.0144434	0.1784	Lrp1/Pdgfrb/Abl2/Abl1
GO:0055006	cardiac cell development	0.0144493	0.1784	Dicer1/Ttn/Pdgfrb/Neb/Notch1/Myh11
GO:0007611	learning or memory	0.0146487	0.18021	Adcy1/Camk4/Kmt2b/Kmt2a/Ttbk1/Map1a/Itpr3/Ephb2/Shc3/Abca7/Abl2/Reln
GO:2000027	regulation of animal organ morphogenesis	0.0149816	0.183645	Celsr3/Med12/Gli1/Dicer1/Dmp1/Lhx1/Notch1/Abl2/Abl1
GO:0001823	mesonephros development	0.0152099	0.185117	Gli3/Zbtb16/Fmn1/Dchs1/Lhx1/Tshz3
GO:0031058	positive regulation of histone modification	0.0152099	0.185117	Nos1/Arrb1/Kmt2a/Lpin1/Tet1/Atm
GO:0031214	biomineral tissue development	0.015275	0.18525	Acvr2b/Dicer1/Sbno2/Dmp1/Notch1/Col1a1/Icmt
GO:0035050	embryonic heart tube development	0.0154478	0.186683	Ift172/Megf8/Notch2/Pcnt/Notch1
GO:0006874	cellular calcium ion homeostasis	0.0159888	0.191151	Chd7/Cacna1a/Nos1/Pkd1/Itpr1/Ryr1/Ank2/Itpr3/Jak3/Kcnk3/Cacna1i/Abl2/Itgb3/Abl1/Cacna1g
GO:0021801	cerebral cortex radial glia guided migration	0.0161528	0.191151	Syne2/Gli3/Reln
GO:0022030	telencephalon glial cell migration	0.0161528	0.191151	Syne2/Gli3/Reln
GO:0044030	regulation of DNA methylation	0.0161528	0.191151	Dnmt3a/Kmt2a/Tet1
GO:1900273	positive regulation of long-term synaptic potentiation	0.0161528	0.191151	Nos1/Ephb2/Reln
GO:1900274	regulation of phospholipase C activity	0.0161528	0.191151	Pdgfrb/Abl2/Abl1
GO:0051235	maintenance of location	0.016339	0.192687	Chd7/Pkd1/Syne2/Syne1/Sorl1/Itpr1/Ryr1/Ank2/Itpr3/Vps13d/Itgb3/Abl1
GO:0001756	somitogenesis	0.016415	0.192918	Med12/Ttn/Lhx1/Notch1/Atm
GO:0060291	long-term synaptic potentiation	0.0168136	0.196926	Nos1/Itpr3/Ephb2/Reln/Tshz3/Abl1
GO:1900271	regulation of long-term synaptic potentiation	0.0169168	0.197406	Nos1/Ephb2/Reln/Abl1
GO:0018394	peptidyl-lysine acetylation	0.01697	0.197406	Nos1/Arrb1/Kmt2a/Trrap/Brpf3/Chd5/Brd4/Per1
GO:0044728	DNA methylation or demethylation	0.0174217	0.201973	Baz2a/Tet3/Dnmt3a/Kmt2a/Tet1
GO:0014074	response to purine-containing compound	0.0176575	0.202646	Irs1/Itpr1/Ryr1/Itpr3/Per1/Rapgef1
GO:0090100	positive regulation of transmembrane receptor protein serine/threonine kinase signaling pathway	0.0176575	0.202646	Numa1/Acvr2b/Hipk2/Notch2/Notch1/Rnf165
GO:1905477	positive regulation of protein localization to membrane	0.0176575	0.202646	Lrp1/Ephb2/Lrp4/Stac2/Mtcl1/Kcnb1
GO:0007413	axonal fasciculation	0.0180553	0.203793	Celsr3/Megf8/Ephb2
GO:0009954	proximal/distal pattern formation	0.0180553	0.203793	Gli1/Gli3/Lrp4
GO:0051894	positive regulation of focal adhesion assembly	0.0180553	0.203793	Col16a1/Fmn1/Abl1
GO:0070076	histone lysine demethylation	0.0180553	0.203793	Kdm5c/Kdm6b/Phf2
GO:0106030	neuron projection fasciculation	0.0180553	0.203793	Celsr3/Megf8/Ephb2
GO:0035023	regulation of Rho protein signal transduction	0.018115	0.203794	Trio/Arrb1/Pdgfrb/Arhgef1/Abl2/Arhgef12/Abl1
GO:0007266	Rho protein signal transduction	0.0183744	0.206034	Trio/Arrb1/Arhgap32/Pdgfrb/Arhgef1/Ntn1/Abl2/Arhgef12/Abl1
GO:0007569	cell aging	0.01853	0.2071	Mnt/Zmiz1/Vash1/Icmt/Atm/Abl1
GO:0034332	adherens junction organization	0.0188793	0.209634	Plekha7/Col16a1/Macf1/Cdh20/Fmn1/Vcl/Abl1
GO:0050905	neuromuscular process	0.0188793	0.209634	Cacna1a/Ighmbp2/Csmd1/Dctn1/Abl2/Icmt/Abl1
GO:0048588	developmental cell growth	0.0192921	0.20976	Slit3/Fn1/Megf8/Plxna3/Vcl/Flrt1/Golga4/Ntn1/Lamb2/Kmt2d/Abl1
GO:0070373	negative regulation of ERK1 and ERK2 cascade	0.0195558	0.20976	Arrb1/Ephb2/Wnk2/Rapgef1/Abl1
GO:0050954	sensory perception of mechanical stimulus	0.0196561	0.20976	Chd7/Nav2/Col11a2/Map1a/Myh14/Col1a1/Sptbn4/Tshz3
GO:0016577	histone demethylation	0.020077	0.20976	Kdm5c/Kdm6b/Phf2
GO:0021697	cerebellar cortex formation	0.020077	0.20976	Cacna1a/Lhx1/Nfix
GO:0045956	positive regulation of calcium ion-dependent exocytosis	0.020077	0.20976	Cacna1i/Kcnb1/Cacna1g
GO:1905314	semi-lunar valve development	0.020077	0.20976	Slit3/Notch2/Notch1
GO:0016358	dendrite development	0.0201569	0.20976	Cacna1a/Sipa1l1/Syne1/Map1a/Fmn1/Flrt1/Cul7/Celsr2/Ephb2/Lrp4/Abl2/Reln
GO:0000183	chromatin silencing at rDNA	0.0202054	0.20976	Baz2a/Phf2
GO:0021940	positive regulation of cerebellar granule cell precursor proliferation	0.0202054	0.20976	Gli1/Lhx1
GO:0033690	positive regulation of osteoblast proliferation	0.0202054	0.20976	Itgb3/Abl1
GO:0034454	microtubule anchoring at centrosome	0.0202054	0.20976	Ccdc120/Dctn1
GO:0044154	histone H3-K14 acetylation	0.0202054	0.20976	Kmt2a/Brd4
GO:0045820	negative regulation of glycolytic process	0.0202054	0.20976	Hdac4/Cbfa2t3
GO:0060020	Bergmann glial cell differentiation	0.0202054	0.20976	Abl2/Abl1
GO:0072224	metanephric glomerulus development	0.0202054	0.20976	Pdgfrb/Lamb2
GO:0086016	AV node cell action potential	0.0202054	0.20976	Ank2/Cacna1g
GO:0086027	AV node cell to bundle of His cell signaling	0.0202054	0.20976	Ank2/Cacna1g
GO:1900221	regulation of amyloid-beta clearance	0.0202054	0.20976	Lrp1/Abca7
GO:1904396	regulation of neuromuscular junction development	0.0202054	0.20976	Lrp4/Dctn1
GO:0008344	adult locomotory behavior	0.0203627	0.20976	Chd7/Cacna1a/Hipk2/Oprd1/Abl2/Sptbn4
GO:0045446	endothelial cell differentiation	0.0203627	0.20976	Acvr2b/Kdm6b/Cul7/Notch1/Notch4/Rapgef1
GO:0050772	positive regulation of axonogenesis	0.0203627	0.20976	Fn1/Megf8/Plxna3/Golga4/Ntn1/Plxnb1
GO:0106027	neuron projection organization	0.0203627	0.20976	Sipa1l1/Map1a/Ephb2/Dctn1/Abl2/Reln
GO:0055074	calcium ion homeostasis	0.0208488	0.213639	Chd7/Cacna1a/Nos1/Pkd1/Itpr1/Ryr1/Ank2/Itpr3/Jak3/Kcnk3/Cacna1i/Abl2/Itgb3/Abl1/Cacna1g
GO:0007517	muscle organ development	0.0208642	0.213639	Chd7/Gli1/Col19a1/Hivep3/Flnb/Ttn/Ryr1/Hdac4/Eln/Myh14/Pax5/Notch1/Disp1/Bcl9l
GO:1903169	regulation of calcium ion transmembrane transport	0.0213075	0.217527	Chd7/Cacna1a/Nos1ap/Ank2/Stac2/Itgb3/Abl1
GO:0061333	renal tubule morphogenesis	0.0218546	0.222448	Col4a1/Gli3/Fmn1/Dchs1/Lhx1
GO:0048738	cardiac muscle tissue development	0.0221069	0.222834	Chd7/Gli1/Kdm6b/Hspg2/Dicer1/Ttn/Pdgfrb/Neb/Notch1/Myh11
GO:0007605	sensory perception of sound	0.0221629	0.222834	Chd7/Nav2/Col11a2/Map1a/Myh14/Col1a1/Sptbn4
GO:0001945	lymph vessel development	0.0222183	0.222834	Acvr2b/Pkd1/Vash1
GO:0045745	positive regulation of G protein-coupled receptor signaling pathway	0.0222183	0.222834	Nos1/Ece1/Itgb3
GO:0090504	epiboly	0.0222183	0.222834	Rreb1/Megf8/Col5a1
GO:1905269	positive regulation of chromatin organization	0.0223147	0.223147	Nos1/Arrb1/Kmt2a/Lpin1/Tet1/Atm
GO:0003407	neural retina development	0.0226179	0.22552	Hipk2/Rab11fip4/Lhx1/Sdk2
GO:0061138	morphogenesis of a branching epithelium	0.023002	0.225656	Pkd1/Col4a1/Dicer1/Gli3/Dchs1/Lhx1/Notch1/Notch4/Abl1
GO:0106106	cold-induced thermogenesis	0.0230419	0.225656	Nova2/Acvr2b/Zfp516/Kdm6b/Ksr2/Notch1/Lpin1
GO:0120161	regulation of cold-induced thermogenesis	0.0230419	0.225656	Nova2/Acvr2b/Zfp516/Kdm6b/Ksr2/Notch1/Lpin1
GO:0043200	response to amino acid	0.0230671	0.225656	Dnmt3a/Col16a1/Col4a1/Col1a1/Slc1a2
GO:0048145	regulation of fibroblast proliferation	0.0233364	0.225656	Fosl2/Kmt2c/Fn1/Pdgfrb/Zmiz1/Itgb3
GO:0001666	response to hypoxia	0.0237253	0.225656	Fosl2/Itpr1/Oprd1/Ryr1/Kcnk3/Notch1/Ece1/Cbfa2t3/Atm
GO:0061371	determination of heart left/right asymmetry	0.0242046	0.225656	Ift172/Megf8/Notch2/Notch1
GO:0007051	spindle organization	0.0242341	0.225656	Numa1/Pkd1/Dicer1/Stard9/Chd3/Pcnt/Myh9/Dctn1
GO:0035194	posttranscriptional gene silencing by RNA	0.0243222	0.225656	Tnrc6c/Dicer1/Ago2/Helz/Tnrc6b
GO:0030099	myeloid cell differentiation	0.024332	0.225656	Camk4/Setd1a/Sh3pxd2a/Zbtb16/Sbno2/Nbeal2/Notch2/Myh9/Jak3/L3mbtl1/Ank1/Cbfa2t3/Itgb3
GO:0003183	mitral valve morphogenesis	0.0243323	0.225656	Dchs1/Notch1
GO:0007440	foregut morphogenesis	0.0243323	0.225656	Acvr2b/Notch1
GO:0010561	negative regulation of glycoprotein biosynthetic process	0.0243323	0.225656	Abca7/Jak3
GO:0010832	negative regulation of myotube differentiation	0.0243323	0.225656	Hdac4/Notch1
GO:0021936	regulation of cerebellar granule cell precursor proliferation	0.0243323	0.225656	Gli1/Lhx1
GO:0030812	negative regulation of nucleotide catabolic process	0.0243323	0.225656	Hdac4/Cbfa2t3
GO:0031936	negative regulation of chromatin silencing	0.0243323	0.225656	Phf2/Tet1
GO:0032488	Cdc42 protein signal transduction	0.0243323	0.225656	Ntn1/Abl1
GO:0048143	astrocyte activation	0.0243323	0.225656	Ttbk1/Lrp1
GO:0051198	negative regulation of coenzyme metabolic process	0.0243323	0.225656	Hdac4/Cbfa2t3
GO:0070166	enamel mineralization	0.0243323	0.225656	Dicer1/Dmp1
GO:0086067	AV node cell to bundle of His cell communication	0.0243323	0.225656	Ank2/Cacna1g
GO:1902430	negative regulation of amyloid-beta formation	0.0243323	0.225656	Sorl1/Abca7
GO:0001919	regulation of receptor recycling	0.0244791	0.225656	Tbc1d16/Arap1/Ece1
GO:0006482	protein demethylation	0.0244791	0.225656	Kdm5c/Kdm6b/Phf2
GO:0008214	protein dealkylation	0.0244791	0.225656	Kdm5c/Kdm6b/Phf2
GO:0021952	central nervous system projection neuron axonogenesis	0.0244791	0.225656	Szt2/Ephb2/Sptbn4
GO:0098698	postsynaptic specialization assembly	0.0244791	0.225656	Sipa1l1/Reln/Ntng2
GO:0006909	phagocytosis	0.025064	0.230427	Lrp1/Myh9/Abca7/Myo18a/Abl2/Itgb3/Rapgef1/Abl1
GO:0072503	cellular divalent inorganic cation homeostasis	0.0251737	0.230815	Chd7/Cacna1a/Nos1/Pkd1/Itpr1/Ryr1/Ank2/Itpr3/Jak3/Kcnk3/Cacna1i/Abl2/Itgb3/Abl1/Cacna1g
GO:0051493	regulation of cytoskeleton organization	0.0253171	0.231082	Numa1/Sptb/Cep250/Pkd1/Lrp1/Dst/Map1a/Pdgfrb/Plxna3/Fmn1/Eln/Neb/Arap1/Phldb1/Plxnb1/Dctn1/Itgb3/Abl1
GO:1990778	protein localization to cell periphery	0.0254667	0.231082	Numa1/Gpc6/Lrp1/Kif13a/Ank2/Ephb2/Stac2/Golga4/Epb41/Dchs1/Ank1/Kcnb1/Sptbn4
GO:0007368	determination of left/right symmetry	0.0254731	0.231082	Acvr2b/Ift172/Megf8/Notch2/Notch1/Disp1
GO:0048144	fibroblast proliferation	0.0254731	0.231082	Fosl2/Kmt2c/Fn1/Pdgfrb/Zmiz1/Itgb3
GO:0001738	morphogenesis of a polarized epithelium	0.0256205	0.231193	Celsr3/Med12/Dchs1/Abl2/Abl1
GO:0016441	posttranscriptional gene silencing	0.0256205	0.231193	Tnrc6c/Dicer1/Ago2/Helz/Tnrc6b
GO:0009913	epidermal cell differentiation	0.0258225	0.231395	Numa1/Gli1/Palld/Flnb/Fosl2/Notch1/Exph5
GO:0045773	positive regulation of axon extension	0.025857	0.231395	Fn1/Megf8/Golga4/Ntn1
GO:0046579	positive regulation of Ras protein signal transduction	0.025857	0.231395	Arrb1/Pdgfrb/Notch2/Notch1
GO:0043409	negative regulation of MAPK cascade	0.0259135	0.231395	Arrb1/Sorl1/Ephb2/Ash1l/Wnk2/Per1/Rapgef1/Abl1
GO:0030183	B cell differentiation	0.0265887	0.234154	Pou2f2/Gon4l/Notch2/Jak3/Atm/Abl1
GO:0032411	positive regulation of transporter activity	0.0265887	0.234154	Kmt2a/Ank2/Ephb2/Stac2/Wnk2/Reln
GO:2000177	regulation of neural precursor cell proliferation	0.0265887	0.234154	Setd1a/Gli1/Gli3/Lhx1/Notch1/Rapgef1
GO:0034764	positive regulation of transmembrane transport	0.0267814	0.234154	Nos1/Irs1/Ank2/Ephb2/Stac2/Wnk2/Slc1a2/Reln/Abl1
GO:0014002	astrocyte development	0.0268593	0.234154	Ttbk1/Lrp1/Lamb2
GO:0043393	regulation of protein binding	0.0269051	0.234154	Pkd1/Hipk2/Arrb1/Ttbk1/Sorl1/Lrp1/Hdac4/Epb41/Abl2/Abl1
GO:0006304	DNA modification	0.0269624	0.234154	Baz2a/Tet3/Dnmt3a/Kmt2a/Tet1
GO:0003170	heart valve development	0.0275757	0.234154	Slit3/Notch2/Dchs1/Notch1
GO:0036293	response to decreased oxygen levels	0.0275869	0.234154	Fosl2/Itpr1/Oprd1/Ryr1/Kcnk3/Notch1/Ece1/Cbfa2t3/Atm
GO:0051099	positive regulation of binding	0.0275869	0.234154	Pkd1/Hipk2/Arrb1/Hmbox1/Lrp1/Epb41/Abl2/Brd4/Abl1
GO:1905330	regulation of morphogenesis of an epithelium	0.0277363	0.234154	Celsr3/Med12/Rreb1/Lhx1/Abl2/Abl1
GO:0048608	reproductive structure development	0.0282709	0.234154	Chd7/Kmt2b/Pkd1/Arrb1/Safb2/Dicer1/Cul7/Notch2/Ash1l/Lhx1/Vash1/Notch1/Zfp568/Atm
GO:0048732	gland development	0.0282709	0.234154	Gli1/Pkd1/Irs1/Rreb1/Gli3/Pdgfrb/Notch2/Ash1l/Ntn1/Notch1/Icmt/Notch4/Atm/Abl1
GO:0008593	regulation of Notch signaling pathway	0.0283483	0.234154	Arrb1/Dicer1/Zmiz1/Notch1/Notch4
GO:0030098	lymphocyte differentiation	0.0283835	0.234154	Chd7/Pou2f2/Gon4l/Dicer1/Gli3/Zbtb16/Notch2/Zmiz1/Jak3/Abl2/Atm/Abl1
GO:0042692	muscle cell differentiation	0.0284736	0.234154	Kdm6b/Dicer1/Ttn/Syne1/Pdgfrb/Ryr1/Ank2/Hdac4/Myh9/Neb/Notch1/Myh11/Tshz3
GO:0120031	plasma membrane bounded cell projection assembly	0.0285817	0.234154	Celsr3/Ablim1/Cep164/Ift172/Cep250/Syne2/Myo10/Syne1/Vcl/Hdac4/Celsr2/Pcnt/Ntn1/Arap1/Dctn1/Abl2/Abl1
GO:0021700	developmental maturation	0.0286096	0.234154	Cacna1a/Xylt1/Pou2f2/Ryr1/Dchs1/Notch1/Plxnb1/Abl2/Anks1/Sptbn4/Reln
GO:0003174	mitral valve development	0.0287701	0.234154	Dchs1/Notch1
GO:0007512	adult heart development	0.0287701	0.234154	Chd7/Ttn
GO:0010882	regulation of cardiac muscle contraction by calcium ion signaling	0.0287701	0.234154	Ank2/Hdac4
GO:0018027	peptidyl-lysine dimethylation	0.0287701	0.234154	Kmt2a/Ash1l
GO:0021702	cerebellar Purkinje cell differentiation	0.0287701	0.234154	Cacna1a/Lhx1
GO:0031000	response to caffeine	0.0287701	0.234154	Irs1/Ryr1
GO:0032717	negative regulation of interleukin-8 production	0.0287701	0.234154	Arrb1/Cactin
GO:0036270	response to diuretic	0.0287701	0.234154	Irs1/Ryr1
GO:0042487	regulation of odontogenesis of dentin-containing tooth	0.0287701	0.234154	Dicer1/Dmp1
GO:0045618	positive regulation of keratinocyte differentiation	0.0287701	0.234154	Numa1/Notch1
GO:0061318	renal filtration cell differentiation	0.0287701	0.234154	Notch2/Lamb2
GO:0072112	glomerular visceral epithelial cell differentiation	0.0287701	0.234154	Notch2/Lamb2
GO:0072283	metanephric renal vesicle morphogenesis	0.0287701	0.234154	Fmn1/Lhx1
GO:0072311	glomerular epithelial cell differentiation	0.0287701	0.234154	Notch2/Lamb2
GO:0072393	microtubule anchoring at microtubule organizing center	0.0287701	0.234154	Ccdc120/Dctn1
GO:0072697	protein localization to cell cortex	0.0287701	0.234154	Numa1/Epb41
GO:0090136	epithelial cell-cell adhesion	0.0287701	0.234154	Plekha7/Vcl
GO:1902287	semaphorin-plexin signaling pathway involved in axon guidance	0.0287701	0.234154	Plxna3/Plxnb1
GO:1990403	embryonic brain development	0.0287701	0.234154	Med12/Pcnt
GO:1904064	positive regulation of cation transmembrane transport	0.0288242	0.234154	Nos1/Ank2/Ephb2/Stac2/Wnk2/Reln/Abl1
GO:0051928	positive regulation of calcium ion transport	0.0289161	0.234344	Itpr1/Pdgfrb/Ank2/Stac2/Jak3/Abl1
GO:0010470	regulation of gastrulation	0.0293587	0.235162	Lhx1/Phldb1/Col5a1
GO:0060674	placenta blood vessel development	0.0293587	0.235162	Pkd1/Notch2/Vash1
GO:0061900	glial cell activation	0.0293587	0.235162	Ttbk1/Lrp1/Atm
GO:0003143	embryonic heart tube morphogenesis	0.0293609	0.235162	Ift172/Megf8/Notch2/Notch1
GO:0008347	glial cell migration	0.0293609	0.235162	Syne2/Gli3/Fn1/Reln
GO:0014910	regulation of smooth muscle cell migration	0.0297786	0.236873	Sorl1/Lrp1/Pdgfrb/Hdac4/Itgb3
GO:0019226	transmission of nerve impulse	0.0297786	0.236873	Cacna1a/Myh14/Cacna1i/Sptbn4/Cacna1g
GO:0007613	memory	0.0298751	0.236873	Adcy1/Camk4/Kmt2b/Map1a/Itpr3/Abca7/Reln
GO:1990845	adaptive thermogenesis	0.0298751	0.236873	Nova2/Acvr2b/Zfp516/Kdm6b/Ksr2/Notch1/Lpin1
GO:0008544	epidermis development	0.0299596	0.236873	Numa1/Ift172/Gli1/Palld/Dicer1/Flnb/Fosl2/Lrp4/Notch1/Exph5
GO:0018105	peptidyl-serine phosphorylation	0.0300604	0.236873	Camk4/Nos1/Pkd1/Hipk2/Arrb1/Ttbk1/Oprd1/Tnks1bp1/Lmtk2/Sptbn4/Atm
GO:0061458	reproductive system development	0.0300826	0.236873	Chd7/Kmt2b/Pkd1/Arrb1/Safb2/Dicer1/Cul7/Notch2/Ash1l/Lhx1/Vash1/Notch1/Zfp568/Atm
GO:0001952	regulation of cell-matrix adhesion	0.0301285	0.236873	Utrn/Col16a1/Macf1/Fmn1/Itgb3/Abl1
GO:0035567	non-canonical Wnt signaling pathway	0.0312132	0.24386	Celsr3/Med12/Abl2/Abl1
GO:0031110	regulation of microtubule polymerization or depolymerization	0.0312536	0.24386	Numa1/Dst/Map1a/Dctn1/Abl1
GO:1901888	regulation of cell junction assembly	0.0312536	0.24386	Col16a1/Macf1/Fmn1/Rapgef1/Abl1
GO:0006997	nucleus organization	0.0313738	0.24386	Neat1/Syne2/Syne1/Chd5/Pom121/Dctn1
GO:0030516	regulation of axon extension	0.0313738	0.24386	Fn1/Megf8/Plxna3/Golga4/Ntn1/Abl1
GO:0021680	cerebellar Purkinje cell layer development	0.0319767	0.245753	Cacna1a/Lhx1/Nfix
GO:0043277	apoptotic cell clearance	0.0319767	0.245753	Lrp1/Abca7/Itgb3
GO:0071260	cellular response to mechanical stimulus	0.0319767	0.245753	Nos1/Piezo1/Col1a1
GO:0150076	neuroinflammatory response	0.0319767	0.245753	Ttbk1/Lrp1/Atm
GO:1903393	positive regulation of adherens junction organization	0.0319767	0.245753	Col16a1/Fmn1/Abl1
GO:0031589	cell-substrate adhesion	0.0325684	0.246408	Utrn/Sned1/Col16a1/Macf1/Rreb1/Fn1/Fmn1/Dmp1/Notch1/Col1a1/Itgb3/Abl1
GO:0008589	regulation of smoothened signaling pathway	0.0327736	0.246408	Ift172/Gli1/Gli3/Megf8/Disp1
GO:0051591	response to cAMP	0.0331327	0.246408	Itpr1/Itpr3/Per1/Rapgef1
GO:0060191	regulation of lipase activity	0.0331327	0.246408	Lrp1/Pdgfrb/Abl2/Abl1
GO:0003188	heart valve formation	0.0335029	0.246408	Dchs1/Notch1
GO:0003215	cardiac right ventricle morphogenesis	0.0335029	0.246408	Chd7/Notch1
GO:0006346	methylation-dependent chromatin silencing	0.0335029	0.246408	Dnmt3a/Tet1
GO:0006525	arginine metabolic process	0.0335029	0.246408	Nos1/Cad
GO:0016246	RNA interference	0.0335029	0.246408	Dicer1/Ago2
GO:0021694	cerebellar Purkinje cell layer formation	0.0335029	0.246408	Cacna1a/Lhx1
GO:0032460	negative regulation of protein oligomerization	0.0335029	0.246408	Sorl1/Oprd1
GO:0043011	myeloid dendritic cell differentiation	0.0335029	0.246408	Camk4/Notch2
GO:0060947	cardiac vascular smooth muscle cell differentiation	0.0335029	0.246408	Pdgfrb/Notch1
GO:0070933	histone H4 deacetylation	0.0335029	0.246408	Baz2a/Hdac4
GO:0072529	pyrimidine-containing compound catabolic process	0.0335029	0.246408	Tet3/Tet1
GO:0072643	interferon-gamma secretion	0.0335029	0.246408	Abl2/Abl1
GO:1902285	semaphorin-plexin signaling pathway involved in neuron projection guidance	0.0335029	0.246408	Plxna3/Plxnb1
GO:1902992	negative regulation of amyloid precursor protein catabolic process	0.0335029	0.246408	Sorl1/Abca7
GO:1903019	negative regulation of glycoprotein metabolic process	0.0335029	0.246408	Abca7/Jak3
GO:2000052	positive regulation of non-canonical Wnt signaling pathway	0.0335029	0.246408	Abl2/Abl1
GO:0043583	ear development	0.0337082	0.247386	Chd7/Dicer1/Gli3/Ephb2/Dchs1/Frem2/Ntn1/Notch1/Ece1
GO:0003158	endothelium development	0.033964	0.24873	Acvr2b/Kdm6b/Cul7/Notch1/Notch4/Rapgef1
GO:0046683	response to organophosphorus	0.0343389	0.250041	Itpr1/Ryr1/Itpr3/Per1/Rapgef1
GO:2001252	positive regulation of chromosome organization	0.0344778	0.250041	Nos1/Numa1/Arrb1/Kmt2a/Hmbox1/Lpin1/Tet1/Atm
GO:1901214	regulation of neuron death	0.034528	0.250041	Cacna1a/Nos1/Hipk2/Arrb1/Sorl1/Itpr1/Nes/Lrp1/Nos1ap/Hdac4/Kcnb1/Atm/Abl1
GO:0021591	ventricular system development	0.0347126	0.250041	Ttn/Celsr2/Pax5
GO:0045601	regulation of endothelial cell differentiation	0.0347126	0.250041	Cul7/Notch1/Notch4
GO:1901385	regulation of voltage-gated calcium channel activity	0.0347126	0.250041	Cacna1a/Nos1ap/Stac2
GO:1901890	positive regulation of cell junction assembly	0.0347126	0.250041	Col16a1/Fmn1/Abl1
GO:0043270	positive regulation of ion transport	0.034728	0.250041	Nos1/Itpr1/Pdgfrb/Ank2/Ephb2/Stac2/Abca7/Wnk2/Jak3/Reln/Abl1
GO:0090090	negative regulation of canonical Wnt signaling pathway	0.0353095	0.25329	Gli1/Mcc/Gli3/Lrp4/Notch1/Rapgef1
GO:0030031	cell projection assembly	0.0353273	0.25329	Celsr3/Ablim1/Cep164/Ift172/Cep250/Syne2/Myo10/Syne1/Vcl/Hdac4/Celsr2/Pcnt/Ntn1/Arap1/Dctn1/Abl2/Abl1
GO:0034333	adherens junction assembly	0.0359499	0.256678	Col16a1/Macf1/Fmn1/Vcl/Abl1
GO:0046632	alpha-beta T cell differentiation	0.0359499	0.256678	Gli3/Zbtb16/Jak3/Abl2/Abl1
GO:0072507	divalent inorganic cation homeostasis	0.0364605	0.256768	Chd7/Cacna1a/Nos1/Pkd1/Itpr1/Ryr1/Ank2/Itpr3/Jak3/Kcnk3/Cacna1i/Abl2/Itgb3/Abl1/Cacna1g
GO:0009855	determination of bilateral symmetry	0.0366888	0.256768	Acvr2b/Ift172/Megf8/Notch2/Notch1/Disp1
GO:0031109	microtubule polymerization or depolymerization	0.0366888	0.256768	Numa1/Nckap5/Dst/Map1a/Dctn1/Abl1
GO:0042116	macrophage activation	0.0371745	0.256768	Ttbk1/Sbno2/Myo18a/Atm
GO:0051893	regulation of focal adhesion assembly	0.0371745	0.256768	Col16a1/Macf1/Fmn1/Abl1
GO:0090109	regulation of cell-substrate junction assembly	0.0371745	0.256768	Col16a1/Macf1/Fmn1/Abl1
GO:0001702	gastrulation with mouth forming second	0.0375656	0.256768	Acvr2b/Megf8/Lhx1
GO:0010677	negative regulation of cellular carbohydrate metabolic process	0.0375656	0.256768	Soga1/Hdac4/Cbfa2t3
GO:0014044	Schwann cell development	0.0375656	0.256768	Med12/Dicer1/Lamb2
GO:0032459	regulation of protein oligomerization	0.0375656	0.256768	Trabd2b/Sorl1/Oprd1
GO:0048536	spleen development	0.0375656	0.256768	Kmt2a/Dicer1/Abl1
GO:0070482	response to oxygen levels	0.0375985	0.256768	Fosl2/Itpr1/Oprd1/Ryr1/Kcnk3/Notch1/Ece1/Cbfa2t3/Atm
GO:0001570	vasculogenesis	0.0376068	0.256768	Pdgfrb/Cul7/Zmiz1/Notch1/Tie1
GO:0055013	cardiac muscle cell development	0.0376068	0.256768	Dicer1/Ttn/Pdgfrb/Neb/Myh11
GO:0061053	somite development	0.0376068	0.256768	Med12/Ttn/Lhx1/Notch1/Atm
GO:0009799	specification of symmetry	0.0381022	0.256768	Acvr2b/Ift172/Megf8/Notch2/Notch1/Disp1
GO:0000212	meiotic spindle organization	0.0385151	0.256768	Dicer1/Myh9
GO:0001833	inner cell mass cell proliferation	0.0385151	0.256768	Ints1/Brd4
GO:0003180	aortic valve morphogenesis	0.0385151	0.256768	Slit3/Notch1
GO:0003222	ventricular trabecula myocardium morphogenesis	0.0385151	0.256768	Chd7/Notch1
GO:0010875	positive regulation of cholesterol efflux	0.0385151	0.256768	Lrp1/Abca7
GO:0010880	regulation of release of sequestered calcium ion into cytosol by sarcoplasmic reticulum	0.0385151	0.256768	Chd7/Ank2
GO:0016322	neuron remodeling	0.0385151	0.256768	Abl2/Anks1
GO:0018119	peptidyl-cysteine S-nitrosylation	0.0385151	0.256768	Nos1/Nos1ap
GO:0021783	preganglionic parasympathetic fiber development	0.0385151	0.256768	Nav2/Plxna3
GO:0021819	layer formation in cerebral cortex	0.0385151	0.256768	Gli3/Reln
GO:0031054	pre-miRNA processing	0.0385151	0.256768	Dicer1/Ago2
GO:0035313	wound healing, spreading of epidermal cells	0.0385151	0.256768	Rreb1/Col5a1
GO:0043584	nose development	0.0385151	0.256768	Chd7/Pou2f1
GO:0048739	cardiac muscle fiber development	0.0385151	0.256768	Ttn/Myh11
GO:0072010	glomerular epithelium development	0.0385151	0.256768	Notch2/Lamb2
GO:0097094	craniofacial suture morphogenesis	0.0385151	0.256768	Gli3/Megf8
GO:2000095	regulation of Wnt signaling pathway, planar cell polarity pathway	0.0385151	0.256768	Abl2/Abl1
GO:2001170	negative regulation of ATP biosynthetic process	0.0385151	0.256768	Hdac4/Cbfa2t3
GO:0031644	regulation of neurological system process	0.0392197	0.260038	Nos1/Igsf9b/Dicer1/Syne1/Dlgap2/Oprd1/Reln
GO:0060675	ureteric bud morphogenesis	0.039297	0.260038	Gli3/Fmn1/Dchs1/Lhx1
GO:0014909	smooth muscle cell migration	0.0393098	0.260038	Sorl1/Lrp1/Pdgfrb/Hdac4/Itgb3
GO:0060993	kidney morphogenesis	0.0393098	0.260038	Gli3/Fmn1/Dchs1/Lhx1/Tshz3
GO:0001763	morphogenesis of a branching structure	0.0396542	0.261809	Pkd1/Col4a1/Dicer1/Gli3/Dchs1/Lhx1/Notch1/Notch4/Abl1
GO:0006473	protein acetylation	0.0399815	0.262955	Nos1/Arrb1/Kmt2a/Trrap/Brpf3/Chd5/Brd4/Per1
GO:0048839	inner ear development	0.0399815	0.262955	Chd7/Dicer1/Gli3/Ephb2/Dchs1/Frem2/Ntn1/Notch1
GO:0021543	pallium development	0.040508	0.263553	Kdm6b/Syne2/Dicer1/Gli3/Plxna3/Pax5/Reln
GO:0021772	olfactory bulb development	0.0405348	0.263553	Chd7/Dicer1/Pcnt
GO:0045197	establishment or maintenance of epithelial cell apical/basal polarity	0.0405348	0.263553	Fat1/Mtcl1/Pard3b
GO:0045880	positive regulation of smoothened signaling pathway	0.0405348	0.263553	Ift172/Gli1/Disp1
GO:0071320	cellular response to cAMP	0.0405348	0.263553	Itpr1/Itpr3/Rapgef1
GO:1900026	positive regulation of substrate adhesion-dependent cell spreading	0.0405348	0.263553	Rreb1/Itgb3/Abl1
GO:0072171	mesonephric tubule morphogenesis	0.0414874	0.269235	Gli3/Fmn1/Dchs1/Lhx1
GO:0071417	cellular response to organonitrogen compound	0.0421714	0.273156	Cacna1a/Nos1/Dnmt3a/Irs1/Col16a1/Col4a1/Soga1/Itpr1/Lrp1/Ryr1/Itpr3/Sik2/Lpin1/Col1a1/Rapgef1
GO:0006476	protein deacetylation	0.0428548	0.274301	Baz2a/Hdac4/Lpin1/Fry/Per1
GO:0030902	hindbrain development	0.0431665	0.274301	Cacna1a/Gli1/Pcnt/Lhx1/Nfix/Abl2/Abl1
GO:0038083	peptidyl-tyrosine autophosphorylation	0.0436189	0.274301	Abl2/Tnk2/Abl1
GO:0043030	regulation of macrophage activation	0.0436189	0.274301	Ttbk1/Myo18a/Atm
GO:0043551	regulation of phosphatidylinositol 3-kinase activity	0.0436189	0.274301	Wdr81/Irs1/Pdgfrb
GO:0050919	negative chemotaxis	0.0436189	0.274301	Slit3/Plxna3/Itgb3
GO:1905332	positive regulation of morphogenesis of an epithelium	0.0436189	0.274301	Rreb1/Lhx1/Abl1
GO:0048747	muscle fiber development	0.0437456	0.274301	Ttn/Ryr1/Hdac4/Myh11
GO:0017014	protein nitrosylation	0.043792	0.274301	Nos1/Nos1ap
GO:0030220	platelet formation	0.043792	0.274301	Nbeal2/Myh9
GO:0030809	negative regulation of nucleotide biosynthetic process	0.043792	0.274301	Hdac4/Cbfa2t3
GO:0051195	negative regulation of cofactor metabolic process	0.043792	0.274301	Hdac4/Cbfa2t3
GO:0060253	negative regulation of glial cell proliferation	0.043792	0.274301	Dicer1/Notch1
GO:0070932	histone H3 deacetylation	0.043792	0.274301	Hdac4/Per1
GO:0072077	renal vesicle morphogenesis	0.043792	0.274301	Fmn1/Lhx1
GO:0098917	retrograde trans-synaptic signaling	0.043792	0.274301	Nos1/Dagla
GO:1900372	negative regulation of purine nucleotide biosynthetic process	0.043792	0.274301	Hdac4/Cbfa2t3
GO:1900451	positive regulation of glutamate receptor signaling pathway	0.043792	0.274301	Ephb2/Reln
GO:0018209	peptidyl-serine modification	0.0455539	0.284816	Camk4/Nos1/Pkd1/Hipk2/Arrb1/Ttbk1/Oprd1/Tnks1bp1/Lmtk2/Sptbn4/Atm
GO:0034767	positive regulation of ion transmembrane transport	0.0459354	0.285917	Nos1/Ank2/Ephb2/Stac2/Wnk2/Reln/Abl1
GO:0007160	cell-matrix adhesion	0.0460426	0.285917	Utrn/Sned1/Col16a1/Macf1/Fn1/Fmn1/Itgb3/Abl1
GO:0030324	lung development	0.0460426	0.285917	Numa1/Acvr2b/Gli1/Dicer1/Gli3/Pdgfrb/Notch1/Tshz3
GO:0043966	histone H3 acetylation	0.0460717	0.285917	Kmt2a/Brpf3/Brd4/Per1
GO:0010927	cellular component assembly involved in morphogenesis	0.0465863	0.285917	Dicer1/Ttn/Pdgfrb/Neb/Phldb1
GO:0007616	long-term memory	0.0468168	0.285917	Adcy1/Camk4/Reln
GO:0021799	cerebral cortex radially oriented cell migration	0.0468168	0.285917	Syne2/Gli3/Reln
GO:0021988	olfactory lobe development	0.0468168	0.285917	Chd7/Dicer1/Pcnt
GO:0032456	endocytic recycling	0.0468168	0.285917	Sorl1/Rab11fip4/Lmtk2
GO:0035136	forelimb morphogenesis	0.0468168	0.285917	Zbtb16/Fmn1/Rnf165
GO:0048846	axon extension involved in axon guidance	0.0468168	0.285917	Slit3/Megf8/Plxna3
GO:0060236	regulation of mitotic spindle organization	0.0468168	0.285917	Numa1/Pkd1/Dctn1
GO:1902284	neuron projection extension involved in neuron projection guidance	0.0468168	0.285917	Slit3/Megf8/Plxna3
GO:0055007	cardiac muscle cell differentiation	0.0473094	0.28841	Kdm6b/Dicer1/Ttn/Pdgfrb/Neb/Myh11
GO:0021766	hippocampus development	0.0484654	0.293191	Kdm6b/Gli3/Plxna3/Reln
GO:0071230	cellular response to amino acid stimulus	0.0484654	0.293191	Dnmt3a/Col16a1/Col4a1/Col1a1
GO:0001657	ureteric bud development	0.0485223	0.293191	Gli3/Fmn1/Dchs1/Lhx1/Tshz3
GO:0072163	mesonephric epithelium development	0.0485223	0.293191	Gli3/Fmn1/Dchs1/Lhx1/Tshz3
GO:0072164	mesonephric tubule development	0.0485223	0.293191	Gli3/Fmn1/Dchs1/Lhx1/Tshz3
GO:0045580	regulation of T cell differentiation	0.0489666	0.293341	Dicer1/Gli3/Zbtb16/Zmiz1/Jak3/Abl1
GO:0003184	pulmonary valve morphogenesis	0.049319	0.293341	Notch2/Notch1
GO:0033630	positive regulation of cell adhesion mediated by integrin	0.049319	0.293341	Piezo1/Itgb3
GO:0036344	platelet morphogenesis	0.049319	0.293341	Nbeal2/Myh9
GO:0048486	parasympathetic nervous system development	0.049319	0.293341	Nav2/Plxna3
GO:0048711	positive regulation of astrocyte differentiation	0.049319	0.293341	Ttbk1/Notch1
GO:0080111	DNA demethylation	0.049319	0.293341	Tet3/Tet1
GO:0097186	amelogenesis	0.049319	0.293341	Dicer1/Dmp1
GO:1904262	negative regulation of TORC1 signaling	0.049319	0.293341	Szt2/Atm
GO:0030323	respiratory tube development	0.0499537	0.295067	Numa1/Acvr2b/Gli1/Dicer1/Gli3/Pdgfrb/Notch1/Tshz3

## Sheet: Hip DE PSHETvsCtrlHET All
Dataset 4: Gene ontologies for differential expression genes
Hippocampus
PS HET vs Control HET
GO ID	Description	P-value	FDR	Gene Symbol
GO:0016569	covalent chromatin modification	1.3189e-05	0.0208479	Nos1/Setd1a/Kmt2b/Baz2a/Pagr1a/Tet3/Kdm5c/Dnmt3a/Arrb1/Kdm6b/Kmt2a/Setd1b/Phf2/Atg5/Dot1l/Huwe1/Kmt2c/Trrap/Brpf3/Chd5/Hdac4/Ash1l/Pax5/Lpin1/Tet1/Kmt2d/Ube2a/Brd4/Atm/Per1
GO:0021517	ventral spinal cord development	1.41092e-05	0.0208479	Cacna1a/Ift172/Ighmbp2/Dicer1/Gli3/Lhx1/Dctn1/Reln
GO:0016570	histone modification	2.48323e-05	0.0208479	Nos1/Setd1a/Kmt2b/Baz2a/Pagr1a/Tet3/Kdm5c/Arrb1/Kdm6b/Kmt2a/Setd1b/Phf2/Atg5/Dot1l/Huwe1/Kmt2c/Trrap/Brpf3/Chd5/Hdac4/Ash1l/Pax5/Lpin1/Tet1/Kmt2d/Ube2a/Brd4/Atm/Per1
GO:0018022	peptidyl-lysine methylation	3.26337e-05	0.0208479	Setd1a/Kmt2b/Baz2a/Pagr1a/Tet3/Kmt2a/Setd1b/Dot1l/Chd5/Ash1l/Pax5/Etfbkmt/Kmt2d
GO:0016571	histone methylation	3.48569e-05	0.0208479	Setd1a/Kmt2b/Baz2a/Pagr1a/Tet3/Kmt2a/Setd1b/Dot1l/Kmt2c/Chd5/Ash1l/Pax5/Tet1/Kmt2d
GO:0006479	protein methylation	3.99483e-05	0.0208479	Setd1a/Kmt2b/Baz2a/Pagr1a/Tet3/Kmt2a/Setd1b/Dot1l/Kmt2c/Chd5/Ash1l/Pax5/Etfbkmt/Tet1/Kmt2d/Icmt
GO:0008213	protein alkylation	3.99483e-05	0.0208479	Setd1a/Kmt2b/Baz2a/Pagr1a/Tet3/Kmt2a/Setd1b/Dot1l/Kmt2c/Chd5/Ash1l/Pax5/Etfbkmt/Tet1/Kmt2d/Icmt
GO:0007409	axonogenesis	4.71058e-05	0.0208479	Adcy1/Celsr3/Ablim1/Cacna1a/Slit3/Sipa1l1/Gli3/Zswim8/Szt2/Fn1/Dst/Map1a/Megf8/Plxna3/Vcl/Ephb2/Lrp4/Golga4/Lmtk2/Lhx1/Ntn1/Lamb2/Notch1/Plxnb1/Sptbn4/Reln/Ntng2/Rnf165/Abl1
GO:0043062	extracellular structure organization	4.86594e-05	0.0208479	Col4a2/Col19a1/Col16a1/Col4a1/Hspg2/Col11a2/Fn1/Prdx4/Eln/Dmp1/Abca7/Pla2g5/Lamb2/Phldb1/Notch1/Col1a1/Col5a1/Abl2/Itgb3/Myh11/Abl1
GO:0030198	extracellular matrix organization	5.85388e-05	0.0209941	Col4a2/Col19a1/Col16a1/Col4a1/Hspg2/Col11a2/Fn1/Prdx4/Eln/Dmp1/Lamb2/Phldb1/Notch1/Col1a1/Col5a1/Abl2/Itgb3/Myh11/Abl1
GO:0034968	histone lysine methylation	5.98899e-05	0.0209941	Setd1a/Kmt2b/Baz2a/Pagr1a/Tet3/Kmt2a/Setd1b/Dot1l/Chd5/Ash1l/Pax5/Kmt2d
GO:0009791	post-embryonic development	7.72048e-05	0.023485	Acvr2b/Kmt2a/Dicer1/Ago2/Szt2/Itpr1/Ash1l/Myl2/Lhx1/Selenop/Abl2/Atm/Abl1
GO:0007156	homophilic cell adhesion via plasma membrane adhesion molecules	8.09402e-05	0.023485	Celsr3/Igsf9b/Hmcn1/Palld/Ptprt/Cdh20/Pcdha9/Cdhr3/Celsr2/Tenm3/Dchs1/Sdk2
GO:0061564	axon development	8.52671e-05	0.023485	Adcy1/Celsr3/Ablim1/Cacna1a/Slit3/Xylt1/Sipa1l1/Gli3/Zswim8/Szt2/Fn1/Dst/Map1a/Megf8/Plxna3/Vcl/Ephb2/Lrp4/Golga4/Lmtk2/Lhx1/Ntn1/Lamb2/Notch1/Plxnb1/Sptbn4/Reln/Ntng2/Rnf165/Abl1
GO:0051568	histone H3-K4 methylation	9.19199e-05	0.0236295	Setd1a/Kmt2b/Pagr1a/Tet3/Kmt2a/Setd1b/Ash1l/Kmt2d
GO:0034329	cell junction assembly	0.000129218	0.0311416	Vmp1/Cd9/Col16a1/Macf1/Plec/Fn1/Cdh20/Dst/Fmn1/Vcl/Cgn/Rap1a/Itgb3/Tns1/Rapgef1/Abl1/Pard6b
GO:0035107	appendage morphogenesis	0.000169668	0.0343003	Chd7/Dicer1/Gli3/Zbtb16/Megf8/Fmn1/Notch2/Pcnt/Lrp4/Sp9/Frem2/Notch1/Ece1/Rnf165
GO:0035108	limb morphogenesis	0.000169668	0.0343003	Chd7/Dicer1/Gli3/Zbtb16/Megf8/Fmn1/Notch2/Pcnt/Lrp4/Sp9/Frem2/Notch1/Ece1/Rnf165
GO:0048736	appendage development	0.000177906	0.0343003	Chd7/Ift172/Dicer1/Gli3/Zbtb16/Megf8/Fmn1/Notch2/Pcnt/Lrp4/Sp9/Frem2/Notch1/Ece1/Rnf165
GO:0060173	limb development	0.000177906	0.0343003	Chd7/Ift172/Dicer1/Gli3/Zbtb16/Megf8/Fmn1/Notch2/Pcnt/Lrp4/Sp9/Frem2/Notch1/Ece1/Rnf165
GO:0001501	skeletal system development	0.000200323	0.0367832	Chd7/Med12/Acvr2b/Ift172/Pkd1/Ankrd11/Xylt1/Hspg2/Dicer1/Col11a2/Gli3/Zbtb16/Megf8/Pdgfrb/Ryr1/Nbeal2/Fmn1/Hdac4/Notch2/Ash1l/Dchs1/Pax5/Lhx1/Etl4/Cdkn1c/Plxnb1/Col1a1
GO:0003334	keratinocyte development	0.000284285	0.0498274	Palld/Flnb/Fosl2/Exph5
GO:0031032	actomyosin structure organization	0.000392738	0.0658434	Arrb1/Ttn/Cdc42bpb/Tac1/Pdgfrb/Eln/Myh9/Myl2/Neb/Epb41/Myh14/Myo18a/Arap1/Cdc42bpa/Abl1
GO:0072012	glomerulus vasculature development	0.000434572	0.0682488	Pdgfrb/Notch3/Notch2/Notch1/Itgb3
GO:0021510	spinal cord development	0.000459262	0.0682488	Med12/Cacna1a/Ift172/Ighmbp2/Dicer1/Gli3/Lhx1/Dctn1/Reln
GO:0034330	cell junction organization	0.000460184	0.0682488	Vmp1/Plekha7/Cd9/Col16a1/Macf1/Plec/Fn1/Cdh20/Dst/Fmn1/Vcl/Cgn/Rap1a/Itgb3/Tns1/Rapgef1/Abl1/Pard6b
GO:0061437	renal system vasculature development	0.00054774	0.0752389	Pdgfrb/Notch3/Notch2/Notch1/Itgb3
GO:0061440	kidney vasculature development	0.00054774	0.0752389	Pdgfrb/Notch3/Notch2/Notch1/Itgb3
GO:0098742	cell-cell adhesion via plasma-membrane adhesion molecules	0.000565853	0.0752389	Celsr3/Igsf9b/Hmcn1/Palld/Ptprt/Cdh20/Pcdha9/Cdhr3/Celsr2/Tenm3/Dchs1/Cd24a/Pcdhb16/Sdk2/Ntng2
GO:0001822	kidney development	0.000623562	0.0753524	Acvr2b/Pkd1/Gli3/Zbtb16/Pdgfrb/Notch3/Fmn1/Notch2/Pcnt/Lrp4/Dchs1/Lhx1/Lamb2/Notch1/Cdkn1c/Itgb3/Arg2/Tshz3
GO:0021515	cell differentiation in spinal cord	0.000648446	0.0753524	Cacna1a/Ift172/Ighmbp2/Dicer1/Gli3/Lhx1
GO:0072001	renal system development	0.000680265	0.0753524	Acvr2b/Pkd1/Col4a1/Gli3/Zbtb16/Pdgfrb/Notch3/Fmn1/Notch2/Pcnt/Lrp4/Dchs1/Lhx1/Lamb2/Notch1/Cdkn1c/Itgb3/Arg2/Tshz3
GO:0021522	spinal cord motor neuron differentiation	0.000681677	0.0753524	Cacna1a/Ift172/Ighmbp2/Dicer1/Gli3
GO:0001654	eye development	0.000699134	0.0753524	Chd7/Fat1/Acvr2b/Hipk2/Col4a1/Pou2f1/Gli3/Kmt2c/Rab11fip4/Pdgfrb/Notch2/Ephb2/Pcnt/Tenm3/Frem2/Lhx1/Lamb2/Cdkn1c/Col5a1/Sdk2/Rd3
GO:0150063	visual system development	0.000699134	0.0753524	Chd7/Fat1/Acvr2b/Hipk2/Col4a1/Pou2f1/Gli3/Kmt2c/Rab11fip4/Pdgfrb/Notch2/Ephb2/Pcnt/Tenm3/Frem2/Lhx1/Lamb2/Cdkn1c/Col5a1/Sdk2/Rd3
GO:0016458	gene silencing	0.000705296	0.0753524	Kmt2b/Baz2a/Dnmt3a/Tnrc6c/Dicer1/Ago2/Phf2/Dot1l/Srcap/Helz/Tnrc6b/Tet1/Kmt2d/Hist2h3c1
GO:0032259	methylation	0.00072964	0.0753524	Setd1a/Kmt2b/Baz2a/Pagr1a/Tet3/Dnmt3a/Kmt2a/Setd1b/Dot1l/Kmt2c/Chd5/Prdm11/Ndufaf5/Ash1l/Pax5/Mettl5/Etfbkmt/Mettl18/Tet1/Kmt2d/Icmt
GO:0048880	sensory system development	0.00076129	0.0753524	Chd7/Fat1/Acvr2b/Hipk2/Col4a1/Pou2f1/Gli3/Kmt2c/Rab11fip4/Pdgfrb/Notch2/Ephb2/Pcnt/Tenm3/Frem2/Lhx1/Lamb2/Cdkn1c/Col5a1/Sdk2/Rd3
GO:0021587	cerebellum morphogenesis	0.000771038	0.0753524	Cacna1a/Gli1/Pcnt/Lhx1/Nfix/Abl2/Abl1
GO:0043010	camera-type eye development	0.000781664	0.0753524	Chd7/Fat1/Acvr2b/Hipk2/Col4a1/Pou2f1/Gli3/Kmt2c/Rab11fip4/Pdgfrb/Notch2/Ephb2/Pcnt/Tenm3/Lhx1/Lamb2/Cdkn1c/Sdk2/Rd3
GO:0018205	peptidyl-lysine modification	0.000828167	0.0778881	Nos1/Setd1a/Kmt2b/Baz2a/Pagr1a/Tet3/Arrb1/Kmt2a/Setd1b/Atg5/Dot1l/Trrap/Brpf3/Chd5/Hdac4/Ash1l/Pax5/Etfbkmt/Kmt2d/Brd4/Per1
GO:0021575	hindbrain morphogenesis	0.00111663	0.102517	Cacna1a/Gli1/Pcnt/Lhx1/Nfix/Abl2/Abl1
GO:0007411	axon guidance	0.00117325	0.104641	Celsr3/Ablim1/Slit3/Gli3/Zswim8/Megf8/Plxna3/Ephb2/Lmtk2/Lhx1/Ntn1/Lamb2/Plxnb1/Reln/Rnf165
GO:0001655	urogenital system development	0.00121358	0.104641	Acvr2b/Pkd1/Col4a1/Gli3/Zbtb16/Pdgfrb/Notch3/Fmn1/Notch2/Ephb2/Pcnt/Lrp4/Dchs1/Lhx1/Lamb2/Notch1/Cdkn1c/Itgb3/Arg2/Tshz3
GO:0097485	neuron projection guidance	0.00123691	0.104641	Celsr3/Ablim1/Slit3/Gli3/Zswim8/Megf8/Plxna3/Ephb2/Lmtk2/Lhx1/Ntn1/Lamb2/Plxnb1/Reln/Rnf165
GO:0007044	cell-substrate junction assembly	0.00130231	0.104641	Col16a1/Macf1/Plec/Fn1/Dst/Fmn1/Itgb3/Tns1/Abl1
GO:0030326	embryonic limb morphogenesis	0.00130258	0.104641	Chd7/Dicer1/Gli3/Zbtb16/Megf8/Notch2/Lrp4/Sp9/Frem2/Notch1/Ece1
GO:0035113	embryonic appendage morphogenesis	0.00130258	0.104641	Chd7/Dicer1/Gli3/Zbtb16/Megf8/Notch2/Lrp4/Sp9/Frem2/Notch1/Ece1
GO:0051480	regulation of cytosolic calcium ion concentration	0.00150663	0.118562	Chd7/Cacna1a/Nos1/Pkd1/Atg5/Itpr1/Tac1/Ryr1/Trhr/Ank2/Itpr3/Jak3/Kcnk3/Cacna1i/Cd24a/Abl2/Itgb3/Abl1/Cacna1g
GO:0051591	response to cAMP	0.0015734	0.12134	Itpr1/Itpr3/Pla2g5/Rap1a/Fdx1/Per1/Rapgef1
GO:0007204	positive regulation of cytosolic calcium ion concentration	0.00163254	0.123433	Chd7/Cacna1a/Pkd1/Atg5/Itpr1/Tac1/Ryr1/Trhr/Ank2/Itpr3/Jak3/Cacna1i/Cd24a/Abl2/Itgb3/Abl1/Cacna1g
GO:0007097	nuclear migration	0.00174564	0.125693	Syne2/Kif1a/Syne1/Ntn1/Cdc42bpa
GO:0034505	tooth mineralization	0.00176022	0.125693	Dicer1/Hacd1/Dmp1/Col1a1
GO:0043931	ossification involved in bone maturation	0.00176022	0.125693	Xylt1/Ryr1/Dchs1/Plxnb1
GO:0061005	cell differentiation involved in kidney development	0.00203906	0.138651	Gli3/Notch2/Lhx1/Lamb2/Notch1/Tshz3
GO:0007423	sensory organ development	0.00204576	0.138651	Chd7/Fat1/Acvr2b/Hipk2/Col4a1/Pou2f1/Dicer1/Gli3/Atg5/Kmt2c/Rab11fip4/Pdgfrb/Notch2/Ephb2/Pcnt/Tenm3/Dchs1/Frem2/Lhx1/Ntn1/Lamb2/Notch1/Cdkn1c/Ece1/Col5a1/Sdk2/Rd3
GO:0070374	positive regulation of ERK1 and ERK2 cascade	0.00204956	0.138651	Arrb1/Pdgfrb/Notch2/Ephb2/Abca7/Pla2g5/Lmtk2/Rap1a/Ccl6/Notch1/Tie1/Abl2/Itgb3/Rapgef1/Abl1
GO:0042476	odontogenesis	0.00212903	0.141544	Acvr2b/Ankrd11/Dicer1/Gli3/Hacd1/Dmp1/Lrp4/Nfic/Col1a1
GO:0060972	left/right pattern formation	0.00220655	0.141808	Ift172/Megf8/Notch2/Notch1
GO:0070977	bone maturation	0.00220655	0.141808	Xylt1/Ryr1/Dchs1/Plxnb1
GO:0070371	ERK1 and ERK2 cascade	0.00244017	0.15425	Ctsh/Arrb1/Fn1/Pdgfrb/Notch2/Ephb2/Abca7/Wnk2/Pla2g5/Lmtk2/Rap1a/Ccl6/Notch1/Tie1/Ece1/Abl2/Itgb3/Rapgef1/Abl1
GO:0060840	artery development	0.00248249	0.154395	Chd7/Acvr2b/Gli3/Lrp1/Pdgfrb/Notch3/Zmiz1/Notch1/Notch4
GO:0060537	muscle tissue development	0.00262846	0.15669	Chd7/Gli1/Kdm6b/Col19a1/Hspg2/Dicer1/Hivep3/Flnb/Ttn/Atg5/Pdgfrb/Ryr1/Hdac4/Eln/Cacybp/Myl2/Neb/Myh14/Pax5/Notch1/Myh11/Bcl9l/Tshz3
GO:0014074	response to purine-containing compound	0.00267587	0.15669	Irs1/Itpr1/Ryr1/Itpr3/Pla2g5/Rap1a/Fdx1/Per1/Rapgef1
GO:0033622	integrin activation	0.00272515	0.15669	Col16a1/Fn1/Piezo1/Cd24a
GO:0040029	regulation of gene expression, epigenetic	0.00276882	0.15669	Setd1a/Baz2a/Dnmt3a/Tnrc6c/Dicer1/Ago2/Phf2/Dot1l/Hdac4/Helz/Tnrc6b/L3mbtl1/Tet1/Kmt2d
GO:0035909	aorta morphogenesis	0.0027897	0.15669	Chd7/Lrp1/Pdgfrb/Notch1/Notch4
GO:0051647	nucleus localization	0.0027897	0.15669	Syne2/Kif1a/Syne1/Ntn1/Cdc42bpa
GO:0006342	chromatin silencing	0.00291243	0.15669	Baz2a/Dnmt3a/Dicer1/Phf2/Dot1l/Tet1/Kmt2d
GO:0050879	multicellular organismal movement	0.00292116	0.15669	Cacna1a/Hipk2/Itpr1/Map1a/Myh14/Tshz3
GO:0050881	musculoskeletal movement	0.00292116	0.15669	Cacna1a/Hipk2/Itpr1/Map1a/Myh14/Tshz3
GO:0043414	macromolecule methylation	0.00298185	0.15669	Setd1a/Kmt2b/Baz2a/Pagr1a/Tet3/Dnmt3a/Kmt2a/Setd1b/Dot1l/Kmt2c/Chd5/Ash1l/Pax5/Etfbkmt/Tet1/Kmt2d/Icmt
GO:0070372	regulation of ERK1 and ERK2 cascade	0.00304205	0.15669	Arrb1/Fn1/Pdgfrb/Notch2/Ephb2/Abca7/Wnk2/Pla2g5/Lmtk2/Rap1a/Ccl6/Notch1/Tie1/Ece1/Abl2/Itgb3/Rapgef1/Abl1
GO:0014706	striated muscle tissue development	0.00307058	0.15669	Chd7/Gli1/Kdm6b/Col19a1/Hspg2/Dicer1/Hivep3/Flnb/Ttn/Atg5/Pdgfrb/Ryr1/Hdac4/Eln/Cacybp/Myl2/Neb/Myh14/Pax5/Notch1/Myh11/Bcl9l
GO:0003002	regionalization	0.00316258	0.15669	Med12/Acvr2b/Ift172/Gli1/Hipk2/Kmt2a/Gli3/Ttn/Zbtb16/Megf8/Celsr2/Notch2/Lrp4/Lhx1/Notch1/Disp1/Reln/Atm
GO:0043967	histone H4 acetylation	0.00320148	0.15669	Arrb1/Kmt2a/Atg5/Trrap/Chd5/Brd4/Per1
GO:0099068	postsynapse assembly	0.00322091	0.15669	Sipa1l1/Ephb2/Lrp4/Reln/Ntng2
GO:0007270	neuron-neuron synaptic transmission	0.00329146	0.15669	Camk4/Cacna1a/Dlgap2
GO:0038063	collagen-activated tyrosine kinase receptor signaling pathway	0.00329146	0.15669	Col4a2/Col4a1/Col1a1
GO:0070986	left/right axis specification	0.00329146	0.15669	Ift172/Notch2/Notch1
GO:0072102	glomerulus morphogenesis	0.00329146	0.15669	Pdgfrb/Notch3/Notch2
GO:0051056	regulation of small GTPase mediated signal transduction	0.00355924	0.167371	Trio/Arrb1/Sipa1l1/Dennd4b/Pdgfrb/Arhgef1/Notch2/Ephb2/Notch1/Abl2/Icmt/Reln/Arhgef12/Cdc42bpa/Rapgef1/Abl1
GO:0070988	demethylation	0.00365006	0.169574	Pagr1a/Tet3/Kdm5c/Kdm6b/Phf2/Tet1
GO:0048844	artery morphogenesis	0.00384476	0.176493	Chd7/Lrp1/Pdgfrb/Notch3/Zmiz1/Notch1/Notch4
GO:0046683	response to organophosphorus	0.00396978	0.177319	Itpr1/Ryr1/Itpr3/Pla2g5/Rap1a/Fdx1/Per1/Rapgef1
GO:0048799	animal organ maturation	0.00400071	0.177319	Xylt1/Ryr1/Dchs1/Plxnb1
GO:0055003	cardiac myofibril assembly	0.00400071	0.177319	Ttn/Pdgfrb/Myl2/Neb
GO:0048706	embryonic skeletal system development	0.00410002	0.179655	Med12/Xylt1/Hspg2/Gli3/Megf8/Pax5/Lhx1/Etl4/Col1a1
GO:0021675	nerve development	0.00420101	0.180971	Chd7/Nav2/Dicer1/Gli3/Plxna3/Ephb2/Rnf165
GO:0071320	cellular response to cAMP	0.0042239	0.180971	Itpr1/Itpr3/Rap1a/Fdx1/Rapgef1
GO:0010561	negative regulation of glycoprotein biosynthetic process	0.00441916	0.187256	Bace2/Abca7/Jak3
GO:0007492	endoderm development	0.00498535	0.208951	Med12/Tnrc6c/Fn1/Lhx1/Notch1/Col5a1
GO:0042475	odontogenesis of dentin-containing tooth	0.00542038	0.209302	Acvr2b/Ankrd11/Dicer1/Gli3/Dmp1/Lrp4/Nfic
GO:0045814	negative regulation of gene expression, epigenetic	0.00542038	0.209302	Baz2a/Dnmt3a/Dicer1/Phf2/Dot1l/Tet1/Kmt2d
GO:0021545	cranial nerve development	0.00543175	0.209302	Chd7/Nav2/Gli3/Plxna3/Ephb2
GO:1903053	regulation of extracellular matrix organization	0.00543175	0.209302	Phldb1/Notch1/Abl2/Itgb3/Abl1
GO:0009611	response to wounding	0.00544013	0.209302	Pik3cd/Proz/Gli1/Neat1/Cd9/Xylt1/C1galt1c1/Macf1/Dicer1/Plec/Rreb1/Fn1/Dst/Nbeal2/Notch2/Vash1/Cd24a/Lamb2/Col1a1/Col5a1/Itgb3/Slc1a2
GO:0048568	embryonic organ development	0.00544013	0.209302	Chd7/Med12/Ift172/Gli1/Pkd1/Hipk2/Tnrc6c/Kmt2a/Hspg2/Gli3/Megf8/Pdgfrb/Notch2/Ephb2/Pcnt/Pax5/Lhx1/Ntn1/Vash1/Notch1/Cdkn1c/Zfp568
GO:0006816	calcium ion transport	0.00546209	0.209302	Chd7/Cacna1a/Nos1/Pkd1/Atg5/Itpr1/Oprd1/Nos1ap/Pdgfrb/Ryr1/Ank2/Itpr3/Stac2/Jak3/Cacna1i/Tpcn1/Itgb3/Slc24a5/Abl1/Cacna1g
GO:0002011	morphogenesis of an epithelial sheet	0.00550118	0.209302	Rreb1/Megf8/Notch2/Notch1/Zfp568/Col5a1
GO:0006874	cellular calcium ion homeostasis	0.00564275	0.209302	Chd7/Cacna1a/Nos1/Pkd1/Atg5/Itpr1/Tac1/Ryr1/Trhr/Ank2/Itpr3/Jak3/Kcnk3/Cacna1i/Cd24a/Efhc1/Abl2/Itgb3/Slc24a5/Abl1/Cacna1g
GO:0035791	platelet-derived growth factor receptor-beta signaling pathway	0.00575364	0.209302	Lrp1/Pdgfrb/Abl1
GO:0038065	collagen-activated signaling pathway	0.00575364	0.209302	Col4a2/Col4a1/Col1a1
GO:0060211	regulation of nuclear-transcribed mRNA poly(A) tail shortening	0.00575364	0.209302	Tnrc6c/Ago2/Tnrc6b
GO:0060213	positive regulation of nuclear-transcribed mRNA poly(A) tail shortening	0.00575364	0.209302	Tnrc6c/Ago2/Tnrc6b
GO:0072109	glomerular mesangium development	0.00575364	0.209302	Pdgfrb/Notch1/Itgb3
GO:0032835	glomerulus development	0.00605497	0.212564	Pdgfrb/Notch3/Notch2/Lamb2/Notch1/Itgb3
GO:0060041	retina development in camera-type eye	0.00607183	0.212564	Chd7/Acvr2b/Hipk2/Col4a1/Rab11fip4/Pdgfrb/Lhx1/Lamb2/Sdk2/Rd3
GO:0060402	calcium ion transport into cytosol	0.00607183	0.212564	Chd7/Atg5/Itpr1/Ryr1/Ank2/Itpr3/Cacna1i/Itgb3/Abl1/Cacna1g
GO:0072006	nephron development	0.00607183	0.212564	Gli3/Pdgfrb/Notch3/Fmn1/Notch2/Dchs1/Lhx1/Lamb2/Notch1/Itgb3
GO:0035137	hindlimb morphogenesis	0.00611894	0.212564	Chd7/Dicer1/Zbtb16/Fmn1/Notch1
GO:0070588	calcium ion transmembrane transport	0.00639406	0.218456	Chd7/Cacna1a/Pkd1/Atg5/Itpr1/Nos1ap/Ryr1/Ank2/Itpr3/Stac2/Tpcn1/Itgb3/Slc24a5/Abl1/Cacna1g
GO:0001701	in utero embryonic development	0.00640186	0.218456	Chd7/Pkd1/Ankrd11/Gins4/Gli3/Ttn/Pdgfrb/Notch2/Zmiz1/Pcnt/Myh9/Ints1/Vash1/Notch1/Cdkn1c/Tie1/Tet1/Zfp568/Kmt2d/Icmt/Ube2a/Brd4/Tshz3
GO:0010927	cellular component assembly involved in morphogenesis	0.00659936	0.223221	Cd9/Dicer1/Ttn/Pdgfrb/Myl2/Zpbp/Neb/Phldb1
GO:0003382	epithelial cell morphogenesis	0.00686499	0.228202	Fat1/Palld/Flnb/Cgn/Notch4
GO:0043124	negative regulation of I-kappaB kinase/NF-kappaB signaling	0.00686499	0.228202	Otud7a/Trim59/Ash1l/Per1/Abl1
GO:0055006	cardiac cell development	0.0070625	0.230859	Dicer1/Ttn/Atg5/Pdgfrb/Myl2/Neb/Notch1/Myh11
GO:0006525	arginine metabolic process	0.00730413	0.230859	Nos1/Cad/Arg2
GO:0035278	miRNA mediated inhibition of translation	0.00730413	0.230859	Tnrc6c/Ago2/Tnrc6b
GO:0040033	negative regulation of translation, ncRNA-mediated	0.00730413	0.230859	Tnrc6c/Ago2/Tnrc6b
GO:0045974	regulation of translation, ncRNA-mediated	0.00730413	0.230859	Tnrc6c/Ago2/Tnrc6b
GO:1903019	negative regulation of glycoprotein metabolic process	0.00730413	0.230859	Bace2/Abca7/Jak3
GO:0051209	release of sequestered calcium ion into cytosol	0.00754975	0.236678	Chd7/Atg5/Itpr1/Ryr1/Ank2/Itpr3/Itgb3/Abl1
GO:0070076	histone lysine demethylation	0.00764628	0.236678	Pagr1a/Kdm5c/Kdm6b/Phf2
GO:0021696	cerebellar cortex morphogenesis	0.00767239	0.236678	Cacna1a/Gli1/Pcnt/Lhx1/Nfix
GO:0048008	platelet-derived growth factor receptor signaling pathway	0.00795958	0.243588	Lrp1/Pdgfrb/Abl2/Itgb3/Rapgef1/Abl1
GO:0055074	calcium ion homeostasis	0.00810336	0.244546	Chd7/Cacna1a/Nos1/Pkd1/Atg5/Itpr1/Tac1/Ryr1/Trhr/Ank2/Itpr3/Jak3/Kcnk3/Cacna1i/Cd24a/Efhc1/Abl2/Itgb3/Slc24a5/Abl1/Cacna1g
GO:0021953	central nervous system neuron differentiation	0.00814088	0.244546	Cacna1a/Ift172/Ighmbp2/Dicer1/Gli3/Szt2/Plxna3/Chd5/Ephb2/Lhx1/Nfix/Sptbn4
GO:0048593	camera-type eye morphogenesis	0.00818111	0.244546	Fat1/Hipk2/Pou2f1/Gli3/Notch2/Ephb2/Tenm3/Lhx1/Sdk2
GO:0071695	anatomical structure maturation	0.0083697	0.248258	Cacna1a/Xylt1/Grb14/Ryr1/Dchs1/Notch1/Cdkn1c/Plxnb1/Abl2/Anks1/Sptbn4
GO:0051283	negative regulation of sequestering of calcium ion	0.00859966	0.250042	Chd7/Atg5/Itpr1/Ryr1/Ank2/Itpr3/Itgb3/Abl1
GO:0051924	regulation of calcium ion transport	0.00864833	0.250042	Chd7/Cacna1a/Nos1/Atg5/Itpr1/Oprd1/Nos1ap/Pdgfrb/Ank2/Stac2/Jak3/Itgb3/Abl1/Cacna1g
GO:0001706	endoderm formation	0.00881262	0.250042	Tnrc6c/Fn1/Lhx1/Col5a1
GO:0016577	histone demethylation	0.00881262	0.250042	Pagr1a/Kdm5c/Kdm6b/Phf2
GO:0030900	forebrain development	0.00906762	0.250042	Chd7/Gli1/Kdm6b/Syne2/Dicer1/Kif1a/Gli3/Szt2/Notch3/Plxna3/Chd5/Ephb2/Pcnt/Pax5/Lhx1/Notch1/Efhc1/Slc1a2/Reln
GO:0001833	inner cell mass cell proliferation	0.00907829	0.250042	Gins4/Ints1/Brd4
GO:0007216	G protein-coupled glutamate receptor signaling pathway	0.00907829	0.250042	Grid2ip/Grik3/Dagla
GO:0010457	centriole-centriole cohesion	0.00907829	0.250042	Cep250/Syne2/Dctn1
GO:0060973	cell migration involved in heart development	0.00907829	0.250042	Pdgfrb/Dchs1/Notch1
GO:0061430	bone trabecula morphogenesis	0.00907829	0.250042	Sbno2/Plxnb1/Col1a1
GO:0048708	astrocyte differentiation	0.00927764	0.25372	Ttbk1/Lrp1/Nfix/Lamb2/Notch1/Abl2/Abl1
GO:0007389	pattern specification process	0.00952246	0.258582	Med12/Acvr2b/Ift172/Gli1/Hipk2/Kmt2a/Gli3/Ttn/Zbtb16/Megf8/Celsr2/Notch2/Lrp4/Dchs1/Lhx1/Alg5/Notch1/Disp1/Reln/Atm
GO:0051282	regulation of sequestering of calcium ion	0.00975516	0.263048	Chd7/Atg5/Itpr1/Ryr1/Ank2/Itpr3/Itgb3/Abl1
GO:0030111	regulation of Wnt signaling pathway	0.00990335	0.26519	Med12/Gli1/Trabd2b/Mcc/Macf1/Gli3/Lrp1/Lrp4/Wnk2/Notch1/Col1a1/Abl2/Mdfic/Sdhaf2/Rapgef1/Abl1
GO:0030178	negative regulation of Wnt signaling pathway	0.0103236	0.27138	Med12/Gli1/Trabd2b/Mcc/Gli3/Lrp1/Lrp4/Notch1/Sdhaf2/Rapgef1
GO:0051208	sequestering of calcium ion	0.0103744	0.27138	Chd7/Atg5/Itpr1/Ryr1/Ank2/Itpr3/Itgb3/Abl1
GO:0072503	cellular divalent inorganic cation homeostasis	0.0104711	0.27138	Chd7/Cacna1a/Nos1/Pkd1/Atg5/Itpr1/Tac1/Ryr1/Trhr/Ank2/Itpr3/Jak3/Kcnk3/Cacna1i/Cd24a/Efhc1/Abl2/Itgb3/Slc24a5/Abl1/Cacna1g
GO:0021537	telencephalon development	0.0104803	0.27138	Chd7/Kdm6b/Syne2/Dicer1/Gli3/Szt2/Plxna3/Ephb2/Pcnt/Pax5/Lhx1/Efhc1/Slc1a2/Reln
GO:0010517	regulation of phospholipase activity	0.0104864	0.27138	Lrp1/Pdgfrb/Pla2g5/Abl2/Abl1
GO:0060401	cytosolic calcium ion transport	0.010849	0.278891	Chd7/Atg5/Itpr1/Ryr1/Ank2/Itpr3/Cacna1i/Itgb3/Abl1/Cacna1g
GO:0060841	venous blood vessel development	0.0110823	0.283003	Acvr2b/Notch1/Notch4
GO:0006482	protein demethylation	0.0114798	0.287443	Pagr1a/Kdm5c/Kdm6b/Phf2
GO:0006929	substrate-dependent cell migration	0.0114798	0.287443	Fn1/Ntn1/Abl2/Anks1
GO:0008214	protein dealkylation	0.0114798	0.287443	Pagr1a/Kdm5c/Kdm6b/Phf2
GO:0006909	phagocytosis	0.0115885	0.288291	Atg5/Lrp1/Myh9/Abca7/Gulp1/Myo18a/Rap1a/Abl2/Itgb3/Rapgef1/Abl1
GO:0048705	skeletal system morphogenesis	0.0117114	0.289482	Med12/Acvr2b/Pkd1/Ankrd11/Hspg2/Col11a2/Gli3/Megf8/Pdgfrb/Fmn1/Pax5/Lhx1/Col1a1
GO:0007369	gastrulation	0.0119602	0.292248	Acvr2b/Kdm6b/Tnrc6c/Macf1/Fn1/Megf8/Lhx1/Phldb1/Zfp568/Col5a1
GO:0051146	striated muscle cell differentiation	0.0119913	0.292248	Kdm6b/Dicer1/Ttn/Atg5/Pdgfrb/Hacd1/Ryr1/Hdac4/Cacybp/Myh9/Myl2/Neb/Nek5/Notch1/Myh11
GO:0055007	cardiac muscle cell differentiation	0.0120507	0.292248	Kdm6b/Dicer1/Ttn/Atg5/Pdgfrb/Cacybp/Myl2/Neb/Myh11
GO:0002064	epithelial cell development	0.0121746	0.293409	Fat1/Palld/Dicer1/Flnb/Fosl2/Cgn/Notch2/Rap1a/Lamb2/Notch1/Exph5/Notch4/Rapgef1
GO:0060560	developmental growth involved in morphogenesis	0.0124125	0.297284	Med12/Slit3/Fn1/Megf8/Plxna3/Fmn1/Vcl/Flrt1/Golga4/Lhx1/Ntn1/Lamb2/Notch1/Zfp568/Abl1
GO:0007628	adult walking behavior	0.0127117	0.298065	Chd7/Cacna1a/Hipk2/Abl2/Sptbn4
GO:0035116	embryonic hindlimb morphogenesis	0.0129879	0.298065	Chd7/Dicer1/Zbtb16/Notch1
GO:2000108	positive regulation of leukocyte apoptotic process	0.0129879	0.298065	Pik3cd/Jak3/Ido1/Cd24a
GO:0051341	regulation of oxidoreductase activity	0.0129995	0.298065	Szt2/Etfbkmt/Abl2/Arg2/Fdx1/Abl1
GO:0060538	skeletal muscle organ development	0.0132265	0.298065	Col19a1/Hivep3/Flnb/Ryr1/Hdac4/Eln/Myh14/Pax5/Notch1/Disp1/Bcl9l
GO:0014808	release of sequestered calcium ion into cytosol by sarcoplasmic reticulum	0.0133212	0.298065	Chd7/Ryr1/Ank2
GO:0033630	positive regulation of cell adhesion mediated by integrin	0.0133212	0.298065	Piezo1/Cd24a/Itgb3
GO:0036344	platelet morphogenesis	0.0133212	0.298065	C1galt1c1/Nbeal2/Myh9
GO:0080182	histone H3-K4 trimethylation	0.0133212	0.298065	Kmt2b/Tet3/Kmt2a
GO:1903514	release of sequestered calcium ion into cytosol by endoplasmic reticulum	0.0133212	0.298065	Chd7/Ryr1/Ank2
GO:0010811	positive regulation of cell-substrate adhesion	0.0133727	0.298065	Utrn/Col16a1/Rreb1/Fn1/Hacd1/Fmn1/Dmp1/Itgb3/Abl1
GO:0030509	BMP signaling pathway	0.0133727	0.298065	Numa1/Acvr2b/Hipk2/Megf8/Notch2/Lrp4/Notch1/Rnf165/Abl1
GO:0060541	respiratory system development	0.0136496	0.301887	Chd7/Ctsh/Numa1/Acvr2b/Gli1/Pou2f1/Dicer1/Gli3/Pdgfrb/Notch1/Hsd11b1/Disp1/Tshz3
GO:0048592	eye morphogenesis	0.0137855	0.301887	Fat1/Hipk2/Pou2f1/Gli3/Notch2/Ephb2/Tenm3/Lhx1/Col5a1/Sdk2
GO:0090659	walking behavior	0.0139355	0.301887	Chd7/Cacna1a/Hipk2/Abl2/Sptbn4
GO:0042692	muscle cell differentiation	0.0139643	0.301887	Kdm6b/Dicer1/Ttn/Atg5/Syne1/Pdgfrb/Hacd1/Ryr1/Ank2/Hdac4/Cacybp/Myh9/Myl2/Neb/Nek5/Notch1/Myh11/Tshz3
GO:0042733	embryonic digit morphogenesis	0.014016	0.301887	Gli3/Zbtb16/Lrp4/Frem2/Notch1/Ece1
GO:0048146	positive regulation of fibroblast proliferation	0.014016	0.301887	Fosl2/Kmt2c/Fn1/Pdgfrb/Zmiz1/Itgb3
GO:0060348	bone development	0.0141198	0.301887	Ift172/Ankrd11/Xylt1/Hspg2/Gli3/Megf8/Ryr1/Nbeal2/Notch2/Dchs1/Plxnb1/Col1a1
GO:0046578	regulation of Ras protein signal transduction	0.0141705	0.301887	Trio/Arrb1/Dennd4b/Pdgfrb/Arhgef1/Notch2/Ephb2/Notch1/Abl2/Icmt/Arhgef12/Rapgef1/Abl1
GO:0009952	anterior/posterior pattern specification	0.0144123	0.303682	Med12/Acvr2b/Hipk2/Kmt2a/Gli3/Ttn/Zbtb16/Celsr2/Lhx1/Notch1/Atm
GO:0055001	muscle cell development	0.0144123	0.303682	Dicer1/Ttn/Atg5/Pdgfrb/Ryr1/Ank2/Hdac4/Myl2/Neb/Notch1/Myh11
GO:0035264	multicellular organism growth	0.01469	0.30646	Chd7/Ankrd11/Dicer1/Kmt2c/Notch2/Pcnt/Cdkn1c/Abl2/Sptbn4/Slc1a2/Icmt/Atm
GO:0060271	cilium assembly	0.0147031	0.30646	Celsr3/Ablim1/Cep164/Ift172/Cep250/Syne2/Atg5/Syne1/Dnali1/Celsr2/Pcnt/Tekt1/Spag16/Rilp/Dctn1/Iqub
GO:0055013	cardiac muscle cell development	0.0157935	0.322324	Dicer1/Ttn/Atg5/Pdgfrb/Myl2/Neb/Myh11
GO:0008090	retrograde axonal transport	0.0157986	0.322324	Kif1a/Dst/Map1a
GO:1900151	regulation of nuclear-transcribed mRNA catabolic process, deadenylation-dependent decay	0.0157986	0.322324	Tnrc6c/Ago2/Tnrc6b
GO:1900153	positive regulation of nuclear-transcribed mRNA catabolic process, deadenylation-dependent decay	0.0157986	0.322324	Tnrc6c/Ago2/Tnrc6b
GO:0032092	positive regulation of protein binding	0.016423	0.3333	Pkd1/Hipk2/Arrb1/Lrp1/Trhr/Epb41/Abl2/Abl1
GO:0072507	divalent inorganic cation homeostasis	0.0172952	0.349164	Chd7/Cacna1a/Nos1/Pkd1/Atg5/Itpr1/Tac1/Ryr1/Trhr/Ank2/Itpr3/Jak3/Kcnk3/Cacna1i/Cd24a/Efhc1/Abl2/Itgb3/Slc24a5/Abl1/Cacna1g
GO:1902275	regulation of chromatin organization	0.0177268	0.353472	Nos1/Setd1a/Kmt2b/Arrb1/Kmt2a/Phf2/Atg5/Pax5/Lpin1/Tet1/Atm
GO:0071772	response to BMP	0.0179847	0.353472	Numa1/Acvr2b/Hipk2/Megf8/Notch2/Lrp4/Notch1/Rnf165/Abl1
GO:0071773	cellular response to BMP stimulus	0.0179847	0.353472	Numa1/Acvr2b/Hipk2/Megf8/Notch2/Lrp4/Notch1/Rnf165/Abl1
GO:0072073	kidney epithelium development	0.0179847	0.353472	Gli3/Fmn1/Notch2/Dchs1/Lhx1/Lamb2/Notch1/Arg2/Tshz3
GO:0061383	trabecula morphogenesis	0.0180751	0.353472	Chd7/Sbno2/Notch1/Plxnb1/Col1a1
GO:0035850	epithelial cell differentiation involved in kidney development	0.0182468	0.353472	Notch2/Lhx1/Lamb2/Notch1
GO:0072210	metanephric nephron development	0.0182468	0.353472	Pdgfrb/Fmn1/Lhx1/Lamb2
GO:0007568	aging	0.0184527	0.353472	Mnt/Zmiz1/Pax5/Vash1/Cdkn1c/Slc1a2/Icmt/Arg2/Rnf165/Atm/Abl1
GO:0001503	ossification	0.0184642	0.353472	Acvr2b/Gli1/Xylt1/Hspg2/Gli3/Zbtb16/Tac1/Sbno2/Ryr1/Hdac4/Dmp1/Lrp4/Dchs1/Notch1/Plxnb1/Col1a1/Icmt
GO:0010810	regulation of cell-substrate adhesion	0.0184863	0.353472	Utrn/Col16a1/Macf1/Rreb1/Fn1/Hacd1/Fmn1/Dmp1/Notch1/Col1a1/Itgb3/Abl1
GO:0010842	retina layer formation	0.018517	0.353472	Hipk2/Lhx1/Sdk2
GO:0048738	cardiac muscle tissue development	0.0189051	0.359104	Chd7/Gli1/Kdm6b/Hspg2/Dicer1/Ttn/Atg5/Pdgfrb/Cacybp/Myl2/Neb/Notch1/Myh11
GO:0055123	digestive system development	0.019241	0.363693	Acvr2b/Ift172/Dicer1/Gli3/Megf8/Dchs1/Notch1/Cdkn1c
GO:0070838	divalent metal ion transport	0.0193458	0.36389	Chd7/Cacna1a/Nos1/Pkd1/Atg5/Itpr1/Oprd1/Nos1ap/Pdgfrb/Ryr1/Ank2/Itpr3/Stac2/Jak3/Cacna1i/Tpcn1/Itgb3/Slc24a5/Abl1/Cacna1g
GO:0072511	divalent inorganic cation transport	0.0198402	0.371378	Chd7/Cacna1a/Nos1/Pkd1/Atg5/Itpr1/Oprd1/Nos1ap/Pdgfrb/Ryr1/Ank2/Itpr3/Stac2/Jak3/Cacna1i/Tpcn1/Itgb3/Slc24a5/Abl1/Cacna1g
GO:0120031	plasma membrane bounded cell projection assembly	0.0202106	0.373673	Celsr3/Ablim1/Cep164/Ift172/Cep250/Syne2/Atg5/Myo10/Syne1/Dnali1/Vcl/Hdac4/Celsr2/Pcnt/Tekt1/Ntn1/Spag16/Arap1/Rilp/Dctn1/Iqub/Abl2/Abl1
GO:0030513	positive regulation of BMP signaling pathway	0.0202536	0.373673	Numa1/Notch2/Notch1/Rnf165
GO:0048013	ephrin receptor signaling pathway	0.0202536	0.373673	Sipa1l1/Ephb2/Notch1/Anks1
GO:0030855	epithelial cell differentiation	0.0206753	0.377651	Fat1/Numa1/Acvr2b/Gli1/Kdm6b/Safb2/Palld/Dicer1/Flnb/Fosl2/Cgn/Cul7/Notch2/Rap1a/Lhx1/Lamb2/Notch1/Cdkn1c/Exph5/Abl2/Notch4/Rapgef1/Abl1
GO:0048675	axon extension	0.0206817	0.377651	Slit3/Fn1/Megf8/Plxna3/Vcl/Golga4/Ntn1/Lamb2/Abl1
GO:0010770	positive regulation of cell morphogenesis involved in differentiation	0.0207629	0.377651	Rreb1/Fn1/Megf8/Plxna3/Cul7/Golga4/Ntn1/Plxnb1/Itgb3/Reln/Abl1
GO:0097553	calcium ion transmembrane import into cytosol	0.0213015	0.383421	Chd7/Atg5/Itpr1/Ryr1/Ank2/Itpr3/Itgb3/Abl1
GO:0035051	cardiocyte differentiation	0.0213909	0.383421	Kdm6b/Dicer1/Ttn/Atg5/Pdgfrb/Cacybp/Myl2/Neb/Notch1/Myh11
GO:0001946	lymphangiogenesis	0.0214779	0.383421	Acvr2b/Pkd1/Vash1
GO:0070233	negative regulation of T cell apoptotic process	0.0214779	0.383421	Jak3/Ido1/Arg2
GO:0045880	positive regulation of smoothened signaling pathway	0.0223908	0.397022	Ift172/Gli1/Tubd1/Disp1
GO:0061326	renal tubule development	0.0224457	0.397022	Col4a1/Gli3/Fmn1/Notch2/Dchs1/Lhx1/Notch1
GO:0001954	positive regulation of cell-matrix adhesion	0.0229539	0.402319	Utrn/Col16a1/Fmn1/Itgb3/Abl1
GO:0007528	neuromuscular junction development	0.0229539	0.402319	Utrn/Col4a1/Lrp4/Lamb2/Dctn1
GO:0002009	morphogenesis of an epithelium	0.0231251	0.403487	Celsr3/Med12/Ctsh/Ift172/Pkd1/Col4a1/Dicer1/Rreb1/Gli3/Megf8/Fmn1/Vcl/Notch2/Dchs1/Frem2/Lhx1/Ntn1/Notch1/Zfp568/Col5a1/Abl2/Notch4/Abl1
GO:0016573	histone acetylation	0.0236586	0.408471	Nos1/Arrb1/Kmt2a/Atg5/Trrap/Brpf3/Chd5/Brd4/Per1
GO:0001823	mesonephros development	0.0237173	0.408471	Gli3/Zbtb16/Fmn1/Dchs1/Lhx1/Arg2/Tshz3
GO:0048562	embryonic organ morphogenesis	0.0238338	0.408471	Chd7/Med12/Ift172/Gli1/Hipk2/Hspg2/Gli3/Megf8/Notch2/Ephb2/Pax5/Lhx1/Ntn1/Notch1
GO:0046777	protein autophosphorylation	0.0239491	0.408471	Cad/Stk10/Map3k9/Pdgfrb/Tnks1bp1/Wnk2/Lmtk2/Sik2/Abl2/Tnk2/Brd4/Atm/Abl1
GO:0006935	chemotaxis	0.0242516	0.408471	Celsr3/Ablim1/Pik3cd/Slit3/Efcab1/Gli3/Zswim8/Fn1/Megf8/Pdgfrb/Plxna3/Ephb2/Lmtk2/Lhx1/Ntn1/Lamb2/Ccl6/Notch1/Plxnb1/Itgb3/Reln/Rnf165
GO:0050770	regulation of axonogenesis	0.024635	0.408471	Cacna1a/Sipa1l1/Zswim8/Fn1/Megf8/Plxna3/Ephb2/Lrp4/Golga4/Ntn1/Plxnb1/Abl1
GO:0043030	regulation of macrophage activation	0.0246605	0.408471	Ttbk1/Pla2g5/Myo18a/Atm
GO:0060071	Wnt signaling pathway, planar cell polarity pathway	0.0246605	0.408471	Celsr3/Med12/Abl2/Abl1
GO:0000289	nuclear-transcribed mRNA poly(A) tail shortening	0.024682	0.408471	Tnrc6c/Ago2/Tnrc6b
GO:0033688	regulation of osteoblast proliferation	0.024682	0.408471	Plxnb1/Itgb3/Abl1
GO:0036303	lymph vessel morphogenesis	0.024682	0.408471	Acvr2b/Pkd1/Vash1
GO:0061298	retina vasculature development in camera-type eye	0.024682	0.408471	Acvr2b/Col4a1/Pdgfrb
GO:0007519	skeletal muscle tissue development	0.0251586	0.412815	Col19a1/Hivep3/Flnb/Ryr1/Hdac4/Eln/Myh14/Pax5/Notch1/Bcl9l
GO:0048754	branching morphogenesis of an epithelial tube	0.0251586	0.412815	Ctsh/Pkd1/Col4a1/Dicer1/Gli3/Dchs1/Lhx1/Notch1/Notch4/Abl1
GO:0042330	taxis	0.0253638	0.414418	Celsr3/Ablim1/Pik3cd/Slit3/Efcab1/Gli3/Zswim8/Fn1/Megf8/Pdgfrb/Plxna3/Ephb2/Lmtk2/Lhx1/Ntn1/Lamb2/Ccl6/Notch1/Plxnb1/Itgb3/Reln/Rnf165
GO:0016055	Wnt signaling pathway	0.0257886	0.419582	Celsr3/Med12/Gli1/Trabd2b/Mcc/Macf1/Gli3/Lrp1/Celsr2/Lrp4/Wnk2/Notch1/Col1a1/Abl2/Mdfic/Bcl9l/Sdhaf2/Rapgef1/Abl1
GO:0030031	cell projection assembly	0.026355	0.425652	Celsr3/Ablim1/Cep164/Ift172/Cep250/Syne2/Atg5/Myo10/Syne1/Dnali1/Vcl/Hdac4/Celsr2/Pcnt/Tekt1/Ntn1/Spag16/Arap1/Rilp/Dctn1/Iqub/Abl2/Abl1
GO:0043588	skin development	0.0263825	0.425652	Numa1/Palld/Dicer1/Flnb/Fosl2/Ryr1/Ash1l/Lrp4/Notch1/Exph5/Col1a1/Col5a1
GO:0007616	long-term memory	0.0270641	0.427159	Adcy1/Camk4/Tac1/Reln
GO:0010259	multicellular organism aging	0.0270641	0.427159	Slc1a2/Icmt/Rnf165/Atm
GO:0050798	activated T cell proliferation	0.0270641	0.427159	Jak3/Ido1/Cd24a/Abl1
GO:0198738	cell-cell signaling by wnt	0.0270773	0.427159	Celsr3/Med12/Gli1/Trabd2b/Mcc/Macf1/Gli3/Lrp1/Celsr2/Lrp4/Wnk2/Notch1/Col1a1/Abl2/Mdfic/Bcl9l/Sdhaf2/Rapgef1/Abl1
GO:0001525	angiogenesis	0.0271049	0.427159	Ctsh/Col4a2/Stab1/Hipk2/Col4a1/Hspg2/Dicer1/Ago2/Fn1/Pdgfrb/Notch3/Notch2/Ephb2/Myh9/Aimp1/Vash1/Notch1/Tie1/Robo4/Itgb3/Notch4/Abl1
GO:0007219	Notch signaling pathway	0.0272114	0.427159	Spen/Ift172/Arrb1/Dicer1/Notch3/Notch2/Zmiz1/Mib2/Notch1/Notch4
GO:0001704	formation of primary germ layer	0.0273621	0.427159	Kdm6b/Tnrc6c/Macf1/Fn1/Lhx1/Col5a1
GO:0030216	keratinocyte differentiation	0.0273621	0.427159	Numa1/Palld/Flnb/Fosl2/Notch1/Exph5
GO:0003181	atrioventricular valve morphogenesis	0.0281289	0.43386	Slit3/Dchs1/Notch1
GO:0021602	cranial nerve morphogenesis	0.0281289	0.43386	Gli3/Plxna3/Ephb2
GO:0060065	uterus development	0.0281289	0.43386	Ash1l/Lhx1/Cdkn1c
GO:0030534	adult behavior	0.0282815	0.434026	Chd7/Cacna1a/Nos1/Hipk2/Zfhx2/Oprd1/Pax5/Abl2/Sptbn4/Slc1a2
GO:0006305	DNA alkylation	0.0286124	0.434026	Baz2a/Tet3/Dnmt3a/Kmt2a/Tet1
GO:0006306	DNA methylation	0.0286124	0.434026	Baz2a/Tet3/Dnmt3a/Kmt2a/Tet1
GO:0060191	regulation of lipase activity	0.0286124	0.434026	Lrp1/Pdgfrb/Pla2g5/Abl2/Abl1
GO:0044782	cilium organization	0.0287534	0.434026	Celsr3/Ablim1/Cep164/Ift172/Cep250/Syne2/Atg5/Syne1/Dnali1/Celsr2/Pcnt/Tekt1/Spag16/Rilp/Dctn1/Iqub
GO:0048704	embryonic skeletal system morphogenesis	0.0290395	0.434026	Med12/Hspg2/Gli3/Megf8/Pax5/Lhx1
GO:0018393	internal peptidyl-lysine acetylation	0.0292794	0.434026	Nos1/Arrb1/Kmt2a/Atg5/Trrap/Brpf3/Chd5/Brd4/Per1
GO:0007569	cell aging	0.0292986	0.434026	Mnt/Zmiz1/Vash1/Icmt/Arg2/Atm/Abl1
GO:0021549	cerebellum development	0.0292986	0.434026	Cacna1a/Gli1/Pcnt/Lhx1/Nfix/Abl2/Abl1
GO:0072009	nephron epithelium development	0.0292986	0.434026	Gli3/Fmn1/Notch2/Dchs1/Lhx1/Lamb2/Notch1
GO:0002437	inflammatory response to antigenic stimulus	0.0296029	0.434026	Notch2/Cd24a/Psma1/Notch1
GO:0090175	regulation of establishment of planar polarity	0.0296029	0.434026	Celsr3/Med12/Abl2/Abl1
GO:2000772	regulation of cellular senescence	0.0296029	0.434026	Vash1/Icmt/Arg2/Abl1
GO:0010769	regulation of cell morphogenesis involved in differentiation	0.0300479	0.438882	Cacna1a/Sipa1l1/Rreb1/Zswim8/Syne1/Fn1/Megf8/Plxna3/Cul7/Ephb2/Lrp4/Golga4/Ntn1/Plxnb1/Itgb3/Reln/Abl1
GO:0001736	establishment of planar polarity	0.0306776	0.442408	Celsr3/Med12/Dchs1/Abl2/Abl1
GO:0007164	establishment of tissue polarity	0.0306776	0.442408	Celsr3/Med12/Dchs1/Abl2/Abl1
GO:0001656	metanephros development	0.0307832	0.442408	Gli3/Pdgfrb/Fmn1/Lhx1/Lamb2/Tshz3
GO:0048565	digestive tract development	0.0308212	0.442408	Acvr2b/Ift172/Dicer1/Gli3/Megf8/Dchs1/Notch1
GO:0003007	heart morphogenesis	0.030863	0.442408	Chd7/Ift172/Slit3/Dicer1/Ttn/Megf8/Ryr1/Notch2/Zmiz1/Myl2/Dchs1/Notch1/Col5a1
GO:0031214	biomineral tissue development	0.0311088	0.442917	Acvr2b/Dicer1/Sbno2/Hacd1/Dmp1/Notch1/Col1a1/Icmt
GO:0060562	epithelial tube morphogenesis	0.0316091	0.442917	Med12/Ctsh/Ift172/Pkd1/Col4a1/Dicer1/Gli3/Megf8/Fmn1/Notch2/Dchs1/Lhx1/Ntn1/Notch1/Abl2/Notch4/Abl1
GO:0006475	internal protein amino acid acetylation	0.0317695	0.442917	Nos1/Arrb1/Kmt2a/Atg5/Trrap/Brpf3/Chd5/Brd4/Per1
GO:0003171	atrioventricular valve development	0.0318174	0.442917	Slit3/Dchs1/Notch1
GO:0008045	motor neuron axon guidance	0.0318174	0.442917	Plxna3/Lhx1/Rnf165
GO:0010499	proteasomal ubiquitin-independent protein catabolic process	0.0318174	0.442917	Psma1/Psmb7/Psma2
GO:0033687	osteoblast proliferation	0.0318174	0.442917	Plxnb1/Itgb3/Abl1
GO:0070296	sarcoplasmic reticulum calcium ion transport	0.0318174	0.442917	Chd7/Ryr1/Ank2
GO:0001881	receptor recycling	0.032278	0.446107	Tbc1d16/Lmtk2/Arap1/Ece1
GO:0045104	intermediate filament cytoskeleton organization	0.032278	0.446107	Macf1/Plec/Dst/Tchh
GO:0045446	endothelial cell differentiation	0.0323961	0.446141	Acvr2b/Kdm6b/Cul7/Rap1a/Notch1/Notch4/Rapgef1
GO:0042116	macrophage activation	0.0328342	0.450565	Ttbk1/Sbno2/Pla2g5/Myo18a/Atm
GO:0031056	regulation of histone modification	0.0330682	0.452167	Nos1/Kmt2b/Arrb1/Kmt2a/Atg5/Pax5/Lpin1/Tet1/Atm
GO:1905114	cell surface receptor signaling pathway involved in cell-cell signaling	0.0335719	0.457432	Celsr3/Med12/Igsf9b/Gli1/Trabd2b/Mcc/Macf1/Gli3/Syne1/Lrp1/Celsr2/Lrp4/Wnk2/Notch1/Col1a1/Abl2/Reln/Mdfic/Bcl9l/Sdhaf2/Rapgef1/Abl1
GO:0042060	wound healing	0.0339569	0.461049	Pik3cd/Proz/Cd9/C1galt1c1/Macf1/Dicer1/Plec/Rreb1/Fn1/Dst/Nbeal2/Notch2/Col1a1/Col5a1/Itgb3
GO:0007416	synapse assembly	0.0340834	0.461143	Cacna1a/Sipa1l1/Flrt1/Ephb2/Lrp4/Ntn1/Pcdhb16/Sdk2/Reln/Ntng2
GO:0051057	positive regulation of small GTPase mediated signal transduction	0.035083	0.469817	Arrb1/Pdgfrb/Notch2/Notch1/Reln
GO:0045103	intermediate filament-based process	0.03509	0.469817	Macf1/Plec/Dst/Tchh
GO:0048483	autonomic nervous system development	0.03509	0.469817	Nav2/Fn1/Plxna3/Kif26a
GO:0009072	aromatic amino acid family metabolic process	0.0357458	0.470429	Pcbd1/Ido1/Iyd
GO:0009620	response to fungus	0.0357458	0.470429	Pik3cd/Atg5/Jagn1
GO:0021533	cell differentiation in hindbrain	0.0357458	0.470429	Cacna1a/Lhx1/Nfix
GO:0045815	positive regulation of gene expression, epigenetic	0.0357458	0.470429	Setd1a/Phf2/Tet1
GO:1901532	regulation of hematopoietic progenitor cell differentiation	0.0357458	0.470429	Setd1a/Pdcd2/Notch1
GO:0022604	regulation of cell morphogenesis	0.0359396	0.471371	Cacna1a/Sipa1l1/Rreb1/Zswim8/Myo10/Syne1/Fn1/Megf8/Plxna3/Cul7/Ephb2/Myh9/Lrp4/Golga4/Epb41/Myh14/Ntn1/Arap1/Plxnb1/Itgb3/Reln/Bcl9l/Abl1
GO:0035904	aorta development	0.0374246	0.479855	Chd7/Lrp1/Pdgfrb/Notch1/Notch4
GO:1904888	cranial skeletal system development	0.0374246	0.479855	Med12/Gli3/Megf8/Pax5/Lhx1
GO:1901888	regulation of cell junction assembly	0.0384358	0.479855	Col16a1/Macf1/Fmn1/Rap1a/Rapgef1/Abl1
GO:0000183	chromatin silencing at rDNA	0.038702	0.479855	Baz2a/Phf2
GO:0021940	positive regulation of cerebellar granule cell precursor proliferation	0.038702	0.479855	Gli1/Lhx1
GO:0033148	positive regulation of intracellular estrogen receptor signaling pathway	0.038702	0.479855	Pagr1a/Kmt2d
GO:0033690	positive regulation of osteoblast proliferation	0.038702	0.479855	Itgb3/Abl1
GO:0034454	microtubule anchoring at centrosome	0.038702	0.479855	Ccdc120/Dctn1
GO:0038180	nerve growth factor signaling pathway	0.038702	0.479855	Rap1a/Rapgef1
GO:0044154	histone H3-K14 acetylation	0.038702	0.479855	Kmt2a/Brd4
GO:0045820	negative regulation of glycolytic process	0.038702	0.479855	Hdac4/Cbfa2t3
GO:0060020	Bergmann glial cell differentiation	0.038702	0.479855	Abl2/Abl1
GO:0072224	metanephric glomerulus development	0.038702	0.479855	Pdgfrb/Lamb2
GO:0086016	AV node cell action potential	0.038702	0.479855	Ank2/Cacna1g
GO:0086027	AV node cell to bundle of His cell signaling	0.038702	0.479855	Ank2/Cacna1g
GO:1900221	regulation of amyloid-beta clearance	0.038702	0.479855	Lrp1/Abca7
GO:1904396	regulation of neuromuscular junction development	0.038702	0.479855	Lrp4/Dctn1
GO:0048747	muscle fiber development	0.0398599	0.481513	Ttn/Ryr1/Hdac4/Myl2/Myh11
GO:0001832	blastocyst growth	0.0399114	0.481513	Gins4/Ints1/Brd4
GO:0021801	cerebral cortex radial glia guided migration	0.0399114	0.481513	Syne2/Gli3/Reln
GO:0022030	telencephalon glial cell migration	0.0399114	0.481513	Syne2/Gli3/Reln
GO:0044030	regulation of DNA methylation	0.0399114	0.481513	Dnmt3a/Kmt2a/Tet1
GO:1900273	positive regulation of long-term synaptic potentiation	0.0399114	0.481513	Nos1/Ephb2/Reln
GO:1900274	regulation of phospholipase C activity	0.0399114	0.481513	Pdgfrb/Abl2/Abl1
GO:0006954	inflammatory response	0.0403248	0.481513	Camk4/Pik3cd/Stab1/Kdm6b/Dicer1/Ttbk1/Fn1/Tac1/Lrp1/Sbno2/Notch2/Ash1l/Pla2g5/Aimp1/Ido1/Cd24a/Psma1/Ccl6/Notch1/Chia1/Atm/Per1
GO:0008589	regulation of smoothened signaling pathway	0.0405218	0.481513	Ift172/Gli1/Gli3/Tubd1/Megf8/Disp1
GO:0009953	dorsal/ventral pattern formation	0.0405218	0.481513	Ift172/Gli1/Gli3/Lrp4/Lhx1/Disp1
GO:0030510	regulation of BMP signaling pathway	0.0405218	0.481513	Numa1/Hipk2/Notch2/Notch1/Rnf165/Abl1
GO:0051099	positive regulation of binding	0.0405658	0.481513	Pkd1/Hipk2/Arrb1/Hmbox1/Lrp1/Pinx1/Trhr/Epb41/Abl2/Brd4/Abl1
GO:0048813	dendrite morphogenesis	0.0406702	0.481513	Cacna1a/Sipa1l1/Syne1/Fmn1/Cul7/Celsr2/Ephb2/Lrp4/Abl2/Reln
GO:0007368	determination of left/right symmetry	0.0410756	0.481513	Acvr2b/Ift172/Megf8/Notch2/Alg5/Notch1/Disp1
GO:0007157	heterophilic cell-cell adhesion via plasma membrane cell adhesion molecules	0.0411271	0.481513	Hmcn1/Tenm3/Dchs1/Cd24a
GO:0018023	peptidyl-lysine trimethylation	0.0411271	0.481513	Kmt2b/Tet3/Kmt2a/Etfbkmt
GO:0098927	vesicle-mediated transport between endosomal compartments	0.0411271	0.481513	Wdr81/Sorl1/Lmtk2/Rilp
GO:0021695	cerebellar cortex development	0.0423894	0.481513	Cacna1a/Gli1/Pcnt/Lhx1/Nfix
GO:0030183	B cell differentiation	0.0429762	0.481513	Pou2f2/Gon4l/Notch2/Jak3/Cd24a/Atm/Abl1
GO:2000177	regulation of neural precursor cell proliferation	0.0429762	0.481513	Setd1a/Gli1/Gli3/Lhx1/Cd24a/Notch1/Rapgef1
GO:0018394	peptidyl-lysine acetylation	0.0431967	0.481513	Nos1/Arrb1/Kmt2a/Atg5/Trrap/Brpf3/Chd5/Brd4/Per1
GO:1903169	regulation of calcium ion transmembrane transport	0.0436348	0.481513	Chd7/Cacna1a/Atg5/Nos1ap/Ank2/Stac2/Itgb3/Abl1
GO:0007413	axonal fasciculation	0.0443112	0.481513	Celsr3/Megf8/Ephb2
GO:0009954	proximal/distal pattern formation	0.0443112	0.481513	Gli1/Gli3/Lrp4
GO:0045822	negative regulation of heart contraction	0.0443112	0.481513	Nos1/Tac1/Sptbn4
GO:0051894	positive regulation of focal adhesion assembly	0.0443112	0.481513	Col16a1/Fmn1/Abl1
GO:0106030	neuron projection fasciculation	0.0443112	0.481513	Celsr3/Megf8/Ephb2
GO:0003179	heart valve morphogenesis	0.0443524	0.481513	Slit3/Notch2/Dchs1/Notch1
GO:0009994	oocyte differentiation	0.0443524	0.481513	Kmt2b/Grb14/Kmt2d/Atm
GO:0007169	transmembrane receptor protein tyrosine kinase signaling pathway	0.044484	0.481513	Col4a2/Irs1/Col4a1/Soga1/Gigyf1/Sipa1l1/Grb14/Ptprt/Lrp1/Pdgfrb/Flrt1/Ephb2/Mvb12b/Lmtk2/Sik2/Notch1/Col1a1/Abl2/Anks1/Itgb3/Rapgef1/Abl1
GO:0060021	roof of mouth development	0.0449052	0.481513	Chd7/Acvr2b/Ift172/Col11a2/Gli3/Ephb2
GO:0022037	metencephalon development	0.0449327	0.481513	Cacna1a/Gli1/Pcnt/Lhx1/Nfix/Abl2/Abl1
GO:0061448	connective tissue development	0.045037	0.481513	Zfp516/Pkd1/Hspg2/Dicer1/Col11a2/Gli3/Zbtb16/Pdgfrb/Notch1/Col1a1/Col5a1/Itgb3
GO:0050890	cognition	0.0451429	0.481513	Adcy1/Camk4/Chd7/Kmt2b/Kmt2a/Ttbk1/Tac1/Map1a/Dop1b/Itpr3/Ephb2/Shc3/Abca7/Abl2/Reln
GO:0007605	sensory perception of sound	0.0454038	0.481513	Chd7/Nav2/Col11a2/Map1a/Myh14/Col1a1/Sptbn4/Serpinb6a
GO:0006875	cellular metal ion homeostasis	0.0461709	0.481513	Chd7/Cacna1a/Nos1/Pkd1/Atg5/Itpr1/Tac1/Ryr1/Trhr/Ank2/Itpr3/Jak3/Kcnk3/Cacna1i/Cd24a/Efhc1/Abl2/Itgb3/Slc24a5/Abl1/Cacna1g
GO:0007264	small GTPase mediated signal transduction	0.0461709	0.481513	Trio/Arrb1/Arhgap32/Sipa1l1/Arhgap31/Dennd4b/Pdgfrb/Ksr2/Arhgef1/Notch2/Ephb2/Rap1a/Ntn1/Notch1/Abl2/Icmt/Reln/Arhgef12/Cdc42bpa/Rapgef1/Abl1
GO:0003183	mitral valve morphogenesis	0.0463204	0.481513	Dchs1/Notch1
GO:0007440	foregut morphogenesis	0.0463204	0.481513	Acvr2b/Notch1
GO:0010832	negative regulation of myotube differentiation	0.0463204	0.481513	Hdac4/Notch1
GO:0021936	regulation of cerebellar granule cell precursor proliferation	0.0463204	0.481513	Gli1/Lhx1
GO:0030812	negative regulation of nucleotide catabolic process	0.0463204	0.481513	Hdac4/Cbfa2t3
GO:0031936	negative regulation of chromatin silencing	0.0463204	0.481513	Phf2/Tet1
GO:0032486	Rap protein signal transduction	0.0463204	0.481513	Rap1a/Rapgef1
GO:0032488	Cdc42 protein signal transduction	0.0463204	0.481513	Ntn1/Abl1
GO:0032693	negative regulation of interleukin-10 production	0.0463204	0.481513	Jak3/Ido1
GO:0033623	regulation of integrin activation	0.0463204	0.481513	Piezo1/Cd24a
GO:0033631	cell-cell adhesion mediated by integrin	0.0463204	0.481513	Piezo1/Cd24a
GO:0038093	Fc receptor signaling pathway	0.0463204	0.481513	Rap1a/Rapgef1
GO:0042983	amyloid precursor protein biosynthetic process	0.0463204	0.481513	Bace2/Abca7
GO:0042984	regulation of amyloid precursor protein biosynthetic process	0.0463204	0.481513	Bace2/Abca7
GO:0043383	negative T cell selection	0.0463204	0.481513	Gli3/Atg5
GO:0045060	negative thymic T cell selection	0.0463204	0.481513	Gli3/Atg5
GO:0048143	astrocyte activation	0.0463204	0.481513	Ttbk1/Lrp1
GO:0051198	negative regulation of coenzyme metabolic process	0.0463204	0.481513	Hdac4/Cbfa2t3
GO:0070166	enamel mineralization	0.0463204	0.481513	Dicer1/Dmp1
GO:0086067	AV node cell to bundle of His cell communication	0.0463204	0.481513	Ank2/Cacna1g
GO:0090043	regulation of tubulin deacetylation	0.0463204	0.481513	Fnta/Fry
GO:1902430	negative regulation of amyloid-beta formation	0.0463204	0.481513	Sorl1/Abca7
GO:0045785	positive regulation of cell adhesion	0.0463282	0.481513	Utrn/Col16a1/Rreb1/Gli3/Myo10/Zbtb16/Fn1/Piezo1/Hacd1/Fmn1/Dmp1/Zmiz1/Jak3/Cd24a/Itgb3/Atm/Abl1
GO:0001570	vasculogenesis	0.0472035	0.487981	Pdgfrb/Cul7/Zmiz1/Rap1a/Notch1/Tie1
GO:0072080	nephron tubule development	0.0472035	0.487981	Gli3/Fmn1/Notch2/Dchs1/Lhx1/Notch1
GO:0090342	regulation of cell aging	0.0477155	0.488215	Vash1/Icmt/Arg2/Abl1
GO:0051279	regulation of release of sequestered calcium ion into cytosol	0.0477326	0.488215	Chd7/Atg5/Ank2/Itgb3/Abl1
GO:1904377	positive regulation of protein localization to cell periphery	0.0477326	0.488215	Numa1/Lrp1/Ephb2/Stac2/Epb41
GO:2000179	positive regulation of neural precursor cell proliferation	0.0477326	0.488215	Setd1a/Gli1/Gli3/Lhx1/Notch1
GO:0055002	striated muscle cell development	0.0481131	0.490805	Dicer1/Ttn/Atg5/Pdgfrb/Ryr1/Hdac4/Myl2/Neb/Myh11
GO:0021697	cerebellar cortex formation	0.0489415	0.495324	Cacna1a/Lhx1/Nfix
GO:0045956	positive regulation of calcium ion-dependent exocytosis	0.0489415	0.495324	Cacna1i/Kcnb1/Cacna1g
GO:1905314	semi-lunar valve development	0.0489415	0.495324	Slit3/Notch2/Notch1
GO:0043393	regulation of protein binding	0.0490895	0.495521	Pkd1/Hipk2/Arrb1/Pcbd1/Ttbk1/Sorl1/Lrp1/Trhr/Hdac4/Epb41/Abl2/Abl1
GO:0007215	glutamate receptor signaling pathway	0.0495734	0.499099	Grid2ip/Grik3/Ephb2/Dagla/Kcnb1/Reln
GO:0050954	sensory perception of mechanical stimulus	0.049831	0.499411	Chd7/Nav2/Col11a2/Map1a/Myh14/Col1a1/Sptbn4/Serpinb6a/Tshz3
