# Supplementary material for: Gene by environment interaction mouse model reveals a functional role for 5-hydroxymethylcytosine in neurodevelopmental disorders
Source: HighWire-hosted journal article supplement (doi:10.1101/gr.276137.121), 2021-12-23
Supplement: Supplemental_Dataset_S5.xlsx [file Supplemental_Dataset_S5.xlsx]

## Sheet: Striatum PSWT vs ControlWT
Transcription Factor Motif Analysis
PS WT vs Control WT
Homer Known Results
mm9, size given
FDR < 0.05
Transcription Factor Symbol	Direction of DhMR	FDR P-value
Arnt:Ahr	hyper	1e-05
Atf3	hyper	0.0192
bHLHE40	hyper	1e-05
bHLHE41	hyper	1e-05
BMAL1	hyper	1e-05
c-Myc	hyper	1e-05
CLOCK	hyper,hypo	1e-05
Cux2	hyper	0.0269
Dlx3	hyper	0.0262
Elk1	hypo	0.0063
ETV1	hypo	0.0374
ETV4	hyper,hypo	0.0265
Fli1	hyper,hypo	0.0414
FOXK2	hyper	0.0194
Fra1	hyper	0.0193
HIF-1a	hyper	1e-05
HIF-1b	hyper,hypo	1e-05
HIF2a	hyper	1e-05
HNF6	hyper	0.0247
JunD	hyper	0.0269
Max	hyper	1e-05
Meis1	hyper	0.0068
MNT	hyper	1e-05
MyoD	hypo	0.0234
n-Myc	hyper	1e-05
NPAS2	hyper	1e-05
NRF1	hyper	0.0036
PAX5	hyper	0.0269
Pax8	hyper	0.0357
Tbx21	hyper	0.0068
TFE3	hyper	0.0017
USF1	hyper	1e-05
Usf2	hyper	1e-05

## Sheet: Striatum PSHETvsControlHET
Transcription Factor Motif Analysis
PS HET vs Control HET
Homer Known Results
mm9, size given
FDR < 0.05
Transcription Factor Symbol	Direction of DhMR	FDR P-value
AMYB	hyper	0.0001
Arnt:Ahr	hyper,hypo	1e-05
Atf1	hyper	1e-05
Atf2	hyper	0.0007
Atf4	hyper	0.0152
Atf7	hyper	0.0012
bHLHE40	hyper,hypo	1e-05
bHLHE41	hyper,hypo	1e-05
BMAL1	hyper,hypo	0.0012
BMYB	hyper	0.0005
c-Jun	hyper	0.0028
c-Myc	hyper,hypo	1e-05
CEBP	hyper	0.0062
CEBP:AP1	hyper	1e-05
Chop	hyper	0.0014
CLOCK	hyper,hypo	1e-05
EHF	hypo	0.0149
ELF3	hypo	0.0469
ELF5	hypo	0.0492
Elk1	hyper	0.0022
Elk4	hyper	0.0039
Fli1	hyper	0.0108
Foxa2	hyper	0.042
Foxo1	hyper	0.0007
Foxo3	hyper	0.0062
HEB	hypo	0.0064
HIC1	hypo	0.0469
HIF-1a	hyper,hypo	1e-05
HIF-1b	hyper,hypo	1e-05
HIF2a	hyper,hypo	1e-05
MafA	hyper	1e-05
Max	hyper,hypo	1e-05
Meis1	hyper,hypo	0.0004
MITF	hyper,hypo	0.0053
MNT	hyper,hypo	1e-05
MYB	hyper	0.0088
MyoG	hypo	0.0202
n-Myc	hyper,hypo	1e-05
NF1	hypo	0.0022
NFAT:AP1	hyper	0.0003
NPAS	hyper,hypo	1e-05
NPAS2	hyper,hypo	1e-05
p63	hyper,hypo	0.0214
PAX5	hypo	0.0142
PAX6	hypo	0.0202
Pknox1	hyper	0.0086
Ptf1a	hypo	0.0023
Sox17	hyper	0.0085
Tbr1	hyper	0.0015
Tbx21	hyper,hypo	0.0221
TFE3	hyper,hypo	0.003
USF1	hyper,hypo	1e-05
Usf2	hyper,hypo	1e-05
Zfp57	hypo	0.0002

## Sheet: Hippocampus PSWT vs ControlWT
Transcription Factor Motif Analysis
PS WT vs Control WT
Homer Known Results
mm9, size given
FDR < 0.05
Transcription Factor Symbol	Direction of DhMR	FDR P-value
bHLHE40	hyper,hypo	1e-05
bHLHE41	hyper	0.0004
c-Myc	hyper,hypo	1e-05
CLOCK	hyper,hypo	1e-05
Elk1	hyper	0.0466
Elk4	hyper	0.0022
ETS1	hyper	0.0205
FOXK1	hyper	0.0008
FOXK2	hyper	0.0345
Foxo1	hyper	0.0054
Foxo3	hyper	0.0001
FOXP1	hyper	0.0466
HIF-1a	hyper,hypo	0.0002
HIF-1b	hyper,hypo	1e-05
HIF2a	hyper,hypo	1e-05
NF1	hypo	0.0234
NPAS	hyper	0.0054
NPAS2	hypo	0.0059
Tcf12	hyper	0.0466
USF1	hyper,hypo	0.0001
ZNF317	hyper	0.0466

## Sheet: Hippocampus PSHETvsControlHET
Transcription Factor Motif Analysis
PS HET vs Control HET
Homer Known Results
mm9, size given
FDR < 0.05
Transcription Factor Symbol	Direction of DhMR	FDR P-value
Arnt:Ahr	hyper,hypo	0.0002
Atf1	hyper	0.0303
bHLHE40	hyper,hypo	0.0001
bHLHE41	hyper,hypo	1e-05
BMAL1	hypo	1e-05
c-Myc	hyper,hypo	1e-05
CLOCK	hyper,hypo	0.0001
EHF	hyper	0.0081
ELF1	hyper	0.011
ELF1	hypo	0.0165
ELF3	hyper	0.0238
ELF5	hyper	0.0113
Elk1	hyper	0.0028
Elk4	hyper	0.0083
Elk4	hypo	0.014
ETV1	hypo	0.0229
ETV4	hyper	0.012
Fli1	hyper	0.0115
GABPA	hypo	0.0124
HIF-1a	hyper,hypo	1e-05
HIF-1b	hyper,hypo	1e-05
HIF2a	hyper,hypo	1e-05
Max	hpyo	1e-05
MITF	hypo	0.0004
MNT	hypo	1e-05
n-Myc	hyper	0.0127
NF1	hyper,hypo	1e-05
NPAS	hypo	1e-05
NPAS2	hypo	1e-05
PAX5	hyper	0.0341
Tlx	hyper	0.001
USF1	hyper,hypo	1e-05
Usf2	hypo	1e-05
