# Supplementary material for: Gene by environment interaction mouse model reveals a functional role for 5-hydroxymethylcytosine in neurodevelopmental disorders
Source: HighWire-hosted journal article supplement (doi:10.1101/gr.276137.121), 2021-12-23
Supplement: Supplemental_Dataset_S6.xlsx [file Supplemental_Dataset_S6.xlsx]

## Sheet: DhMR CLOCK ChIP
Dataset 6: HET-DhMRs with a CLOCK motif and differential CLOCK binding
Hippocampus
PS-HET vs Control-HET
Chromosome	Region start	Region end	Region width	log fold-change	P-value	Genomic structure annotation	Region distance to gene TSS*	ENSEMBLID	Gene Symbol	Differentially Expressed
Chr5	137954533	137956484	1952	1.96715	0.0460478	Promoter/Intron-(uc009acn.1/13856,-intron-1-of-2)	-3624	ENSMUSG00000029714	Gigyf1	Yes
Chr4	154964407	154965487	1081	7.00236	0.000890697	3'-UTR	7627	ENSMUSG00000029063	Nadk
Chr4	147888334	147889471	1138	3.30907	0.00924685	Exon-(uc008vur.2/56717,-exon-30-of-58)	-13763	ENSMUSG00000028989	Angptl7
Chr6	145757821	145759801	1981	2.81707	0.0133291	Promoter-(<=1kb)	918	ENSMUSG00000030259	Rassf8
Chr8	64303399	64304658	1260	2.83644	0.018381	Intron-(uc009luf.1/72333,-intron-2-of-21)	-64513	ENSMUSG00000058056	Palld	Yes
Chr6	50545357	50546378	1022	2.98412	0.0189937	Promoter-(<=1kb)	211	ENSMUSG00000029828	4921507P07Rik
Chr6	34657450	34658779	1330	2.88659	0.0256575	Promoter-(<=1kb)	-665	ENSMUSG00000029761	Cald1
Chr10	39749789	39751224	1436	3.19453	0.0289882	Downstream-(2-3kb)	-4715	ENSMUSG00000038522	Mfsd4b1
Chr10	9119904	9121352	1449	2.97179	0.0309944	Distal-Intergenic	273654	ENSMUSG00000060487	NA
Chr3	105000162	105001208	1047	-2.33643	0.0329087	Distal-Intergenic	-144098	ENSMUSG00000062127	NA
Chr9	87213617	87214789	1173	-2.49248	0.033051	Distal-Intergenic	-63250	ENSMUSG00000056919	NA
Chr1	139552183	139553326	1144	-2.56835	0.033077	Distal-Intergenic	-309706	ENSMUSG00000065565	NA
Chr8	13343341	13344863	1523	2.73776	0.0370394	Intron-(uc009kxp.1/21781,-intron-2-of-11)	3676	ENSMUSG00000038482	Tfdp1
Chr15	75394088	75395312	1225	2.71098	0.0387299	Promoter-(1-2kb)	1766	ENSMUSG00000022577	Ly6h
Chr5	151152841	151153861	1021	3.07491	0.0399017	Intron-(uc009atv.2/320365,-intron-7-of-60)	54878	ENSMUSG00000056602	Fry	Yes
Chr9	99330347	99331445	1099	-2.50256	0.0423401	Intron-(uc009rec.1/17532,-intron-1-of-5)	5686	ENSMUSG00000032470	Mras
Chr16	94493739	94496775	3037	-1.86102	0.0436413	Intron-(uc008aag.1/110948,-intron-1-of-9)	12758	ENSMUSG00000040820	Hlcs
Chr19	25109560	25110629	1070	2.89683	0.0460347	Intron-(uc008hay.1/76088,-intron-1-of-3)	-16451	ENSMUSG00000052085	Dock8
Chr18	50330255	50331450	1196	2.3335	0.0494696	Exon-(uc008eww.1/15488,-exon-15-of-24)	42262	ENSMUSG00000024507	Hsd17b4
* Transcription start site

## Sheet: Genomic CLOCK ChIP 
Dataset 6 Genome-wide chromatin immunoprecipitation with CLOCK
Hippocampus
PS-HET vs Control-HET
Chromosome	Region start	Region end	log fold change	P-value	Genomic structure annotation	distanceToTSS	ENSEMBL ID	Gene Symbol	Gene Name
Chr9	83503726	83504725	8.15259	7.54652e-09	Intron (uc009qwm.1/212531, intron 3 of 3)	61781	ENSMUSG00000032261	Sh3bgrl2	SH3 domain binding glutamic acid-rich protein like 2
Chr8	26850071	26851070	7.65508	1.01404e-07	Intron (uc009lgv.2/72108, intron 9 of 17)	13682	ENSMUSG00000061313	Ddhd2	DDHD domain containing 2
Chr2	129790026	129791025	4.78033	2.4899e-07	Distal Intergenic	-47085	NA	NA	NA
Chr13	15660205	15661204	7.63179	2.71454e-07	Intron (uc007pnq.1/14634, intron 3 of 11)	104649	ENSMUSG00000021318	Gli3	GLI-Kruppel family member GLI3
Chr14	53696234	53697233	4.92909	4.83459e-07	Intron (uc007tqs.1/uc007tqs.1, intron 2 of 2)	-580864	ENSMUSG00000059887	Olfr1507	olfactory receptor 1507
Chr6	118596077	118597076	7.74143	5.36368e-07	Intron (uc012erg.1/12288, intron 13 of 29)	36402	ENSMUSG00000051331	Cacna1c	calcium channel, voltage-dependent, L type, alpha 1C subunit
Chr5	122779441	122780440	4.45569	1.01812e-06	Intron (uc012eda.1/231724, intron 10 of 12)	23764	ENSMUSG00000038569	Rad9b	RAD9 checkpoint clamp component B
Chr17	6499492	6500491	7.23003	1.88007e-06	Promoter (7-8kb)	-7172	ENSMUSG00000092074	Dynlt1a	dynein light chain Tctex-type 1A
Chr11	12970856	12971855	5.12903	1.99318e-06	Distal Intergenic	-605893	NA	NA	NA
ChrX	72046427	72047426	3.85933	2.79126e-06	Distal Intergenic	-35109	NA	NA	NA
Chr16	75976119	75977118	4.44901	2.80518e-06	Distal Intergenic	-22542	NA	NA	NA
Chr11	52071750	52072749	4.84109	3.00279e-06	Promoter (1-2kb)	-1137	ENSMUSG00000000782	Tcf7	transcription factor 7, T cell specific
Chr5	130554014	130555013	5.59268	4.23187e-06	Promoter (<=1kb)	-343	ENSMUSG00000034118	Tpst1	protein-tyrosine sulfotransferase 1
Chr7	25177041	25178040	5.79486	4.59209e-06	Promoter (6-7kb)	-6607	ENSMUSG00000002210	Smg9	smg-9 homolog, nonsense mediated mRNA decay factor (C. elegans)
Chr6	138398345	138399344	7.2388	6.58397e-06	Intron (uc009eno.1/uc009eno.1, intron 3 of 4)	-26954	ENSMUSG00000030226	Lmo3	LIM domain only 3
Chr13	108911590	108912589	7.002	7.03886e-06	Intron (uc007ruu.2/75597, intron 1 of 3)	36230	ENSMUSG00000068184	Ndufaf2	NADH:ubiquinone oxidoreductase complex assembly factor 2
Chr11	5932646	5933645	4.6928	7.37888e-06	Intron (uc007hxr.2/12323, intron 1 of 20)	32106	ENSMUSG00000057897	Camk2b	calcium/calmodulin-dependent protein kinase II, beta
Chr10	7202544	7203543	4.37685	7.76549e-06	Distal Intergenic	-106055	NA	NA	NA
Chr6	55383008	55384224	-3.51333	1.19645e-05	Promoter (17-18kb)	-17750	ENSMUSG00000029778	Adcyap1r1	adenylate cyclase activating polypeptide 1 receptor 1
Chr3	88772835	88773834	7.33998	1.30162e-05	Intron (uc008pxi.1/192195, intron 2 of 2)	3101	ENSMUSG00000028053	Ash1l	ASH1 like histone lysine methyltransferase
Chr17	94079440	94080439	3.91483	1.42797e-05	Distal Intergenic	480678	NA	NA	NA
Chr9	13520074	13521073	7.19503	1.46101e-05	Distal Intergenic	-32552	NA	NA	NA
Chr14	21083391	21084390	3.87029	1.56947e-05	Exon (uc011zgl.1/74571, exon 2 of 5)	3994	ENSMUSG00000023387	Kcnk16	potassium channel, subfamily K, member 16
Chr3	13566517	13567516	4.36773	2.06952e-05	Intron (uc008oqb.2/76897, intron 2 of 9)	93297	ENSMUSG00000039717	Ralyl	RALY RNA binding protein-like
Chr6	8216506	8217682	-3.50661	2.1515e-05	Promoter (2-3kb)	-2784	ENSMUSG00000089862	Umad1	UMAP1-MVP12 associated (UMA) domain containing 1
Chr4	43301110	43302109	4.00674	2.8431e-05	Intron (uc008spj.1/320571, intron 2 of 11)	21079	ENSMUSG00000028457	Atp8b5	ATPase, class I, type 8B, member 5
ChrX	163018624	163019623	4.13712	3.59478e-05	Intron (uc009uww.1/54156, intron 1 of 11)	4025	ENSMUSG00000000402	Egfl6	EGF-like-domain, multiple 6
Chr7	117374491	117375490	4.65842	3.64489e-05	Intron (uc009jez.2/20947, intron 1 of 3)	9274	ENSMUSG00000031015	Swap70	SWA-70 protein
Chr17	48171543	48172542	4.35413	3.64935e-05	Distal Intergenic	-54040	NA	NA	NA
Chr4	125661134	125662287	-3.64217	4.2659e-05	Distal Intergenic	-39616	NA	NA	NA
Chr3	147836132	147837131	4.16551	4.75258e-05	Distal Intergenic	648884	NA	NA	NA
Chr11	113242994	113243993	4.27057	4.83559e-05	Intron (uc007mek.2/69806, intron 6 of 11)	-179842	ENSMUSG00000087259	2610035D17Rik	RIKEN cDNA 2610035D17 gene
Chr4	143209229	143210228	6.7586	5.31642e-05	Distal Intergenic	4323	NA	NA	NA
Chr4	115991627	115992626	3.83769	5.53216e-05	Exon (uc008ugn.1/17776, exon 12 of 30)	97108	ENSMUSG00000028698	Pik3r3	phosphoinositide-3-kinase regulatory subunit 3
Chr4	132144170	132145169	4.92618	5.58574e-05	Distal Intergenic	24188	NA	NA	NA
Chr5	18300977	18301976	4.05697	5.83129e-05	Distal Intergenic	-430888	NA	NA	NA
Chr6	92175373	92176372	3.78547	5.92077e-05	Promoter (10-11kb)	-10568	ENSMUSG00000014550	Rbsn	rabenosyn, RAB effector
Chr18	46298621	46299620	4.01104	6.59129e-05	Distal Intergenic	58852	NA	NA	NA
Chr6	76465977	76466976	3.78589	6.80722e-05	Distal Intergenic	-725735	NA	NA	NA
Chr17	13923990	13924989	4.02219	7.67995e-05	Intron (uc008amr.1/17356, intron 1 of 32)	25378	ENSMUSG00000068036	Afdn	afadin, adherens junction formation factor
Chr3	19430195	19431301	-3.33774	7.89513e-05	Promoter (<=1kb)	0	ENSMUSG00000027606	Dnajc5b	DnaJ heat shock protein family (Hsp40) member C5 beta
Chr16	33284025	33285024	4.14615	8.08911e-05	Exon (uc007yzz.1/69150, exon 8 of 14)	32483	ENSMUSG00000022808	Snx4	sorting nexin 4
ChrX	58367702	58368701	4.19572	8.16781e-05	Promoter (<=1kb)	-852	ENSMUSG00000071753	Cdr1os	cerebellar degeneration related antigen 1, opposite strand
Chr17	93583594	93584593	4.37247	8.53644e-05	Promoter (13-14kb)	-13768	ENSMUSG00000024256	Adcyap1	adenylate cyclase activating polypeptide 1
Chr8	23214673	23215672	2.89383	0.000108914	Intron (uc009lco.1/330721, intron 10 of 19)	19853	ENSMUSG00000037738	Nek5	NIMA (never in mitosis gene a)-related expressed kinase 5
Chr3	15322431	15323606	-2.94385	0.000114884	Intron (uc008oqv.1/751864, intron 1 of 2)	8696	ENSMUSG00000078783	Gm9733	predicted gene 9733
Chr14	123682677	123683696	-3.26757	0.000117984	Exon (uc007vbq.1/338370, exon 42 of 44)	-300194	ENSMUSG00000041594	Tmtc4	transmembrane and tetratricopeptide repeat containing 4
Chr5	145168692	145169691	3.79342	0.000119381	Intron (uc009alp.2/55950, intron 3 of 3)	-49711	ENSMUSG00000038859	Baiap2l1	BAI1-associated protein 2-like 1
Chr7	23624733	23625732	3.36962	0.000122271	Promoter (2-3kb)	2892	ENSMUSG00000095931	Vmn1r159	vomeronasal 1 receptor 159
Chr9	122935515	122936514	3.64374	0.00012648	Distal Intergenic	5071	NA	NA	NA
Chr12	85539685	85540684	5.31572	0.000129742	Promoter (4-5kb)	-4720	ENSMUSG00000042507	Elmsan1	ELM2 and Myb/SANT-like domain containing 1
ChrX	66625010	66626009	3.54874	0.000139976	Intron (uc009tjb.1/14266, intron 1 of 19)	11504	ENSMUSG00000031189	Aff2	AF4/FMR2 family, member 2
Chr10	31871411	31872410	3.4051	0.000140121	Intron (uc007etw.2/432450, intron 3 of 6)	249769	ENSMUSG00000069670	Nkain2	Na+/K+ transporting ATPase interacting 2
Chr17	34872745	34873879	-2.85009	0.000141248	Exon (uc008cdk.2/12268, exon 16 of 41)	6963	ENSMUSG00000073418	C4b	complement component 4B (Chido blood group)
Chr9	103344158	103345157	3.33994	0.000143886	Intron (uc009rgt.1/uc009rgt.1, intron 5 of 5)	6269	ENSMUSG00000032556	Bfsp2	beaded filament structural protein 2, phakinin
Chr8	53640838	53641837	4.11545	0.000147593	Distal Intergenic	-955243	NA	NA	NA
Chr8	116040223	116041222	4.02636	0.00014813	Distal Intergenic	-118264	NA	NA	NA
Chr9	62861092	62862091	3.82064	0.000157005	Distal Intergenic	-32406	NA	NA	NA
Chr9	34070747	34071746	4.991	0.000162327	Distal Intergenic	-221965	NA	NA	NA
Chr19	29538079	29539078	2.8976	0.000164253	Intron (uc008hdk.2/58205, intron 5 of 5)	41530	ENSMUSG00000016498	Pdcd1lg2	programmed cell death 1 ligand 2
Chr6	79708484	79709483	4.04329	0.000166203	Distal Intergenic	-58542	NA	NA	NA
Chr13	113303288	113304287	3.7805	0.000168485	Distal Intergenic	49010	NA	NA	NA
Chr18	89876587	89877722	-3.72882	0.000170365	Intron (uc008fvr.1/623279, intron 1 of 7)	60806	ENSMUSG00000073514	Dok6	docking protein 6
Chr4	86876740	86877807	-3.35992	0.000170709	Promoter (<=1kb)	-296	ENSMUSG00000037996	Slc24a2	solute carrier family 24 (sodium/potassium/calcium exchanger), member 2
Chr14	29652696	29653695	2.85213	0.000172267	Distal Intergenic	-177699	NA	NA	NA
Chr19	44948779	44949778	3.24426	0.000175296	Distal Intergenic	-55831	NA	NA	NA
Chr6	145802778	145803989	-2.69717	0.000184576	Distal Intergenic	9871	NA	NA	NA
Chr6	126338887	126339886	4.03253	0.000190445	Distal Intergenic	145687	NA	NA	NA
Chr9	73149673	73150929	-3.01436	0.000199196	Distal Intergenic	188397	NA	NA	NA
Chr10	67571655	67572654	4.19909	0.00020933	Intron (uc007fmf.1/71371, intron 5 of 6)	26720	ENSMUSG00000019947	Arid5b	AT rich interactive domain 5B (MRF1-like)
Chr6	105647339	105648338	3.23331	0.000213907	Intron (uc009dcr.2/269784, intron 1 of 19)	19600	ENSMUSG00000064293	Cntn4	contactin 4
Chr8	17564259	17565258	2.73555	0.000224458	Distal Intergenic	-28874	NA	NA	NA
Chr6	95595242	95596249	-2.80393	0.00022731	Intron (uc009daa.2/20917, intron 2 of 10)	9344	ENSMUSG00000061838	Suclg2	succinate-Coenzyme A ligase, GDP-forming, beta subunit
Chr5	147975842	147976841	4.66501	0.000227842	Distal Intergenic	-23431	NA	NA	NA
Chr13	88502700	88503699	4.65001	0.000228072	Distal Intergenic	-457378	NA	NA	NA
Chr5	6929816	6931455	-3.1764	0.000228158	Intron (uc012dry.1/207618, intron 1 of 3)	-372709	ENSMUSG00000040514	Tex47	testis expressed 47
Chr12	36095544	36096543	3.71122	0.000242066	Distal Intergenic	123118	NA	NA	NA
Chr14	23314812	23316321	-2.86855	0.000245571	Intron (uc007slz.2/76633, intron 2 of 6)	-87307	ENSMUSG00000063458	Lrmda	leucine rich melanocyte differentiation associated
Chr12	25793222	25794221	4.9719	0.000257201	Promoter (12-13kb)	-12265	ENSMUSG00000020644	Id2	inhibitor of DNA binding 2
Chr14	20808889	20809888	3.88747	0.000259427	Promoter (12-13kb)	-12418	ENSMUSG00000043004	Gng2	guanine nucleotide binding protein (G protein), gamma 2
ChrX	48390890	48392455	-2.42106	0.000260655	Promoter (19-20kb)	-19695	ENSMUSG00000050029	Rap2c	RAP2C, member of RAS oncogene family
Chr2	18154229	18155228	4.31572	0.000267231	Intron (uc008ilt.2/13418, intron 8 of 12)	159229	ENSMUSG00000026740	Dnajc1	DnaJ heat shock protein family (Hsp40) member C1
Chr6	148866407	148867699	-2.72736	0.000283558	Downstream (1-2kb)	-21759	ENSMUSG00000030309	Caprin2	caprin family member 2
ChrX	49268856	49269855	3.50568	0.000284548	Distal Intergenic	54369	NA	NA	NA
Chr12	46529283	46530906	-3.10975	0.000296202	Distal Intergenic	-353813	NA	NA	NA
Chr11	6344869	6345868	3.41699	0.000315506	Promoter (<=1kb)	-423	ENSMUSG00000041126	H2afv	H2A histone family, member V
Chr1	174711763	174712762	3.77111	0.000324211	Distal Intergenic	83576	NA	NA	NA
Chr2	70724177	70725176	3.80244	0.000329531	Distal Intergenic	-60640	NA	NA	NA
Chr17	77728011	77729010	3.80245	0.000329812	Distal Intergenic	-870578	NA	NA	NA
Chr5	9494211	9495210	3.46798	0.000341924	Intron (uc008wll.1/108069, intron 5 of 5)	118507	ENSMUSG00000077896	Mir879	microRNA 879
ChrX	10524796	10525795	2.46918	0.00036893	Distal Intergenic	230305	NA	NA	NA
Chr15	21736373	21737573	-3.65658	0.000370667	Distal Intergenic	695166	NA	NA	NA
Chr5	39851639	39852638	3.90389	0.000380243	Distal Intergenic	183232	NA	NA	NA
Chr9	35511938	35513126	-2.99529	0.000382264	Promoter (16-17kb)	-16982	ENSMUSG00000091215	Pate1	prostate and testis expressed 1
Chr15	96113442	96115165	-2.75686	0.000382761	Promoter (<=1kb)	0	NA	E330033B04Rik	RIKEN cDNA E330033B04 gene
Chr9	3354428	3355520	-2.49348	0.000386396	Intron (uc009oat.1/67667, intron 7 of 11)	18950	ENSMUSG00000025899	Alkbh8	alkB homolog 8, tRNA methyltransferase
ChrX	150570123	150571122	3.72557	0.000393298	Promoter (14-15kb)	-14895	ENSMUSG00000094577	Samt1b	spermatogenesis associated multipass transmembrane protein 1b
Chr16	59926656	59927793	-2.80181	0.000394704	Intron (uc007zpo.1/13840, intron 10 of 17)	77754	ENSMUSG00000055540	Epha6	Eph receptor A6
Chr5	120843168	120844167	3.32404	0.000397403	Distal Intergenic	-37728	NA	NA	NA
Chr12	85876304	85877303	3.23826	0.00039913	Distal Intergenic	-33499	NA	NA	NA
Chr18	87453405	87454404	3.44066	0.000410852	Distal Intergenic	571108	NA	NA	NA
Chr17	62379591	62380618	-3.26069	0.000411355	Distal Intergenic	655730	NA	NA	NA
Chr6	17741195	17742194	3.76237	0.000423676	Intron (uc009azu.1/64213, intron 1 of 15)	41979	ENSMUSG00000029534	St7	suppression of tumorigenicity 7
Chr2	103811703	103812702	3.8213	0.0004282	Promoter (1-2kb)	1259	ENSMUSG00000032698	Lmo2	LIM domain only 2
Chr13	32948168	32950197	-3.24421	0.000435723	Promoter (5-6kb)	-5114	ENSMUSG00000044734	Serpinb1a	serine (or cysteine) peptidase inhibitor, clade B, member 1a
Chr11	42699088	42700696	-2.60484	0.000439328	Distal Intergenic	-262683	NA	NA	NA
Chr16	64633249	64634248	3.7781	0.000441915	Distal Intergenic	136517	NA	NA	NA
Chr7	50280783	50282562	-2.48266	0.000445784	Exon (uc012fjb.1/668612, exon 5 of 7)	6615	ENSMUSG00000091528	Vmn2r126	vomeronasal 2, receptor 126
Chr3	82352038	82353037	3.20317	0.000450215	Promoter (<=1kb)	-31	ENSMUSG00000028004	Npy2r	neuropeptide Y receptor Y2
Chr10	22594693	22595840	-2.98399	0.000498094	Distal Intergenic	-54759	NA	NA	NA
Chr11	72487715	72488735	-2.95892	0.000531064	Promoter (14-15kb)	-14769	ENSMUSG00000020790	Ankfy1	ankyrin repeat and FYVE domain containing 1
Chr4	143680704	143681703	3.23774	0.0005312	Promoter (8-9kb)	-8080	ENSMUSG00000073723	Gm13102	predicted gene 13102
Chr2	157425829	157426828	2.56271	0.000557133	Distal Intergenic	-33732	NA	NA	NA
Chr13	80097304	80098348	-3.04644	0.000557313	Distal Intergenic	-924335	NA	NA	NA
Chr9	100762677	100763676	3.65204	0.000561105	Intron (uc009rez.1/20842, intron 5 of 7)	171618	ENSMUSG00000032527	Pccb	propionyl Coenzyme A carboxylase, beta polypeptide
Chr1	88257811	88258810	3.7004	0.000567702	Promoter (1-2kb)	1662	NA	C130036L24Rik	RIKEN cDNA C130036L24 gene
Chr14	40902060	40903732	-2.75674	0.000570043	Distal Intergenic	-615684	NA	NA	NA
Chr15	62089913	62090912	3.68883	0.000573284	Exon (uc007vyl.1/19296, exon 5 of 5)	-38907	NA	H2afy3	H2A histone family, member Y3
Chr6	44465031	44466589	-2.41289	0.000573889	Distal Intergenic	-543471	NA	NA	NA
Chr2	86063051	86064050	3.65038	0.000592213	Distal Intergenic	5076	NA	NA	NA
Chr1	125281489	125283354	-2.70287	0.000622349	Exon (uc007cjx.2/269109, exon 14 of 26)	658782	ENSMUSG00000036815	Dpp10	dipeptidylpeptidase 10
Chr4	108401899	108403574	-2.92982	0.000634944	Promoter (5-6kb)	-5418	ENSMUSG00000034557	Zfyve9	zinc finger, FYVE domain containing 9
Chr5	134424420	134425419	3.35924	0.000637048	Distal Intergenic	-150199	NA	NA	NA
Chr4	137103563	137104562	2.58313	0.000638514	Promoter (2-3kb)	2129	ENSMUSG00000028763	Hspg2	perlecan (heparan sulfate proteoglycan 2)
Chr14	38649164	38650163	3.69996	0.00064787	Distal Intergenic	-700656	NA	NA	NA
ChrX	147856761	147858815	-2.99098	0.00064966	Intron (uc009upc.1/207375, intron 4 of 15)	-77372	ENSMUSG00000084771	A230072E10Rik	RIKEN cDNA A230072E10 gene
ChrX	116344176	116345255	-3.35941	0.000651446	Distal Intergenic	-695550	NA	NA	NA
Chr2	130446980	130447979	3.12418	0.000663593	Intron (uc008mji.2/140629, intron 2 of 5)	7784	ENSMUSG00000027300	Ubox5	U box domain containing 5
ChrX	60585904	60587196	-2.85431	0.000670568	Distal Intergenic	818177	NA	NA	NA
Chr4	152200640	152201639	3.34124	0.000673893	Distal Intergenic	128991	NA	NA	NA
Chr8	43958713	43959712	3.28959	0.000675966	Distal Intergenic	267128	NA	NA	NA
Chr19	37442424	37443423	2.8949	0.000695249	Promoter (7-8kb)	-7470	ENSMUSG00000012443	Kif11	kinesin family member 11
Chr2	115253277	115254276	2.88951	0.000715462	Distal Intergenic	83661	NA	NA	NA
Chr6	42147536	42149096	-2.69973	0.000726526	Promoter (16-17kb)	-16231	ENSMUSG00000051917	Tas2r144	taste receptor, type 2, member 144
Chr14	51728046	51729045	3.7752	0.000727106	Promoter (5-6kb)	-5056	ENSMUSG00000072575	Eddm3b	epididymal protein 3B
Chr12	47172632	47173631	3.02043	0.000729317	Distal Intergenic	746131	NA	NA	NA
Chr5	60306582	60307581	2.97127	0.000735389	Distal Intergenic	-1892501	NA	NA	NA
Chr9	8777140	8778459	-2.57486	0.000752428	Distal Intergenic	-121374	NA	NA	NA
Chr13	33398925	33399924	3.2462	0.000753505	Promoter (16-17kb)	-16022	ENSMUSG00000038327	Serpinb9f	serine (or cysteine) peptidase inhibitor, clade B, member 9f
Chr12	29423436	29425046	-2.54879	0.000756967	Intron (uc007nfx.2/217449, intron 2 of 11)	10213	ENSMUSG00000020628	Trappc12	trafficking protein particle complex 12
Chr3	14787600	14788860	-2.5375	0.000761434	Promoter (9-10kb)	-9140	ENSMUSG00000027556	Car1	carbonic anhydrase 1
Chr11	54139642	54140641	3.11801	0.000765899	Exon (uc007ixo.1/216739, exon 7 of 21)	11237	ENSMUSG00000020333	Acsl6	acyl-CoA synthetase long-chain family member 6
Chr8	96499406	96501070	-2.72018	0.000766905	Exon (uc009mvn.1/23802, exon 11 of 14)	35470	ENSMUSG00000031751	Amfr	autocrine motility factor receptor
Chr3	76799632	76800877	-2.8263	0.000778383	Distal Intergenic	921112	NA	NA	NA
Chr6	62072120	62073781	-2.67785	0.000778405	Intron (uc009cdw.2/232035, intron 10 of 10)	941801	ENSMUSG00000039578	Ccser1	coiled-coil serine rich 1
Chr5	111408932	111410276	-2.50655	0.000799415	Intron (uc008yrz.2/209683, intron 2 of 24)	-22887	ENSMUSG00000076163	Mir701	microRNA 701
Chr15	56624886	56626661	-2.96926	0.000810966	Distal Intergenic	-98785	NA	NA	NA
Chr9	40711755	40712924	-2.64238	0.000843874	Promoter (6-7kb)	-6054	ENSMUSG00000032023	Jhy	junctional cadherin complex regulator
Chr6	87986068	87987133	-3.03431	0.000852425	Intron (uc009cuy.1/19349, intron 1 of 7)	8093	ENSMUSG00000079477	Rab7	RAB7, member RAS oncogene family
Chr16	34032917	34033916	2.57767	0.000854662	Exon (uc012aew.1/545156, exon 43 of 60)	-54105	ENSMUSG00000061751	Kalrn	kalirin, RhoGEF kinase
Chr9	56447679	56448937	-2.8197	0.00085601	Distal Intergenic	34272	NA	NA	NA
Chr8	114061580	114062690	-2.369	0.000858788	Promoter (<=1kb)	0	ENSMUSG00000033545	Znrf1	zinc and ring finger 1
Chr6	64859987	64860986	3.17971	0.000881208	Distal Intergenic	-131675	NA	NA	NA
Chr3	27742567	27743566	3.54844	0.000887257	Distal Intergenic	51724	NA	NA	NA
Chr4	61061386	61062472	-2.83267	0.000890657	Intron (uc008tba.2/17841, intron 2 of 5)	38264	ENSMUSG00000096674	Mup15	major urinary protein 15
Chr4	154964407	154965487	7.00236	0.000890697	3'-UTR	7627	ENSMUSG00000029063	Nadk	NAD kinase
Chr6	113259700	113260699	3.9447	0.000905441	Promoter (2-3kb)	2509	ENSMUSG00000001632	Brpf1	bromodomain and PHD finger containing, 1
Chr15	62623628	62624627	3.17334	0.000912721	Distal Intergenic	-572622	NA	NA	NA
Chr10	46907895	46908982	-2.74344	0.000937675	Distal Intergenic	1515550	NA	NA	NA
Chr5	17245625	17246624	3.09103	0.000948762	Distal Intergenic	45605	NA	NA	NA
Chr14	54930999	54932381	-2.80211	0.000961033	Distal Intergenic	-28399	NA	NA	NA
Chr6	20494772	20496016	-2.45371	0.00097123	Distal Intergenic	-670093	NA	NA	NA
Chr15	70358269	70359803	-3.55301	0.000987845	Distal Intergenic	1198465	NA	NA	NA
Chr10	22647271	22648848	-2.72236	0.000988882	Distal Intergenic	-107337	NA	NA	NA
ChrX	9091425	9092796	-3.07066	0.00100711	Distal Intergenic	-44975	NA	NA	NA
ChrX	158070407	158071406	3.638	0.00102411	Distal Intergenic	-83562	NA	NA	NA
Chr8	47146065	47147064	2.7562	0.00102871	Intron (uc009lpu.2/102141, intron 5 of 16)	50109	ENSMUSG00000031637	Lrp2bp	Lrp2 binding protein
Chr2	36206426	36207425	2.68452	0.00104358	Distal Intergenic	-24873	NA	NA	NA
Chr6	14956837	14957836	3.53867	0.00107208	Intron (uc009ayx.1/114142, intron 2 of 4)	105488	ENSMUSG00000029563	Foxp2	forkhead box P2
Chr13	54688018	54689128	-3.51943	0.00107756	Promoter (2-3kb)	2307	ENSMUSG00000025869	Nop16	NOP16 nucleolar protein
ChrX	121097195	121098194	3.19076	0.00107787	Distal Intergenic	145384	NA	NA	NA
Chr19	53796023	53797022	4.71864	0.00108677	Intron (uc008hwz.2/73713, intron 1 of 13)	44227	ENSMUSG00000043639	Rbm20	RNA binding motif protein 20
Chr17	53100788	53101787	2.83927	0.00109825	Intron (uc008czk.1/uc008czk.1, intron 4 of 4)	358700	ENSMUSG00000035580	Kcnh8	potassium voltage-gated channel, subfamily H (eag-related), member 8
Chr13	82838385	82839384	3.64111	0.00112355	Distal Intergenic	-803649	NA	NA	NA
Chr17	21584539	21585538	3.5205	0.00112361	Promoter (1-2kb)	-1778	ENSMUSG00000023892	Zfp51	zinc finger protein 51
Chr12	24578553	24579552	3.07378	0.00113487	Distal Intergenic	-603894	NA	NA	NA
Chr14	32164277	32165372	-2.87038	0.00114777	Intron (uc007sxm.1/12339, intron 6 of 20)	14367	ENSMUSG00000021893	Capn7	calpain 7
Chr11	43192075	43193074	2.66019	0.00115326	Promoter (4-5kb)	-4112	ENSMUSG00000065601	Mir146	microRNA 146
Chr5	88429365	88430364	3.89645	0.001156	Promoter (1-2kb)	-1186	ENSMUSG00000029280	Smr3a	submaxillary gland androgen regulated protein 3A
ChrX	120645034	120646191	-2.57557	0.00116187	Distal Intergenic	427866	NA	NA	NA
Chr7	144606513	144607720	-2.3041	0.00116279	Promoter (4-5kb)	-4074	ENSMUSG00000040139	9430038I01Rik	RIKEN cDNA 9430038I01 gene
Chr15	77854877	77855876	3.4065	0.00117425	Intron (uc007wop.2/12300, intron 1 of 3)	-53623	ENSMUSG00000016554	Eif3d	eukaryotic translation initiation factor 3, subunit D
Chr10	123581660	123583476	-2.34859	0.00117953	Distal Intergenic	-322654	NA	NA	NA
Chr4	121754919	121755918	2.88492	0.00118467	Distal Intergenic	-460189	NA	NA	NA
Chr1	13662653	13663652	3.48158	0.00119137	Exon (uc007aiv.1/381246, exon 2 of 4)	3801	ENSMUSG00000067813	Xkr9	X-linked Kx blood group related 9
Chr6	112150427	112151426	3.39864	0.00121658	Promoter (9-10kb)	-9276	ENSMUSG00000100219	1700054K19Rik	RIKEN cDNA 1700054K19 gene
Chr10	3210788	3212054	-2.90544	0.00121995	Promoter (<=1kb)	0	ENSMUSG00000015202	Cnksr3	Cnksr family member 3
Chr5	96629226	96630382	-2.77881	0.00122667	Promoter (8-9kb)	-8752	ENSMUSG00000029486	Mrpl1	mitochondrial ribosomal protein L1
Chr11	116486331	116487663	-3.09898	0.00122982	Promoter (<=1kb)	670	ENSMUSG00000020806	Rhbdf2	rhomboid 5 homolog 2
Chr3	145516926	145517925	2.77304	0.00123285	Intron (uc008rqr.2/69219, intron 4 of 5)	-67843	ENSMUSG00000028191	Bcl10	B cell leukemia/lymphoma 10
Chr17	95201536	95202567	-2.27779	0.00124065	Intron (uc008dwr.1/72139, intron 3 of 4)	31221	ENSMUSG00000071302	2610044O15Rik8	RIKEN cDNA 2610044O15 gene
Chr8	42067565	42069400	-2.19587	0.00125816	Intron (uc009lni.2/68797, intron 3 of 5)	31449	ENSMUSG00000045636	Mtus1	mitochondrial tumor suppressor 1
Chr7	107667750	107668749	3.79917	0.00126861	Promoter (4-5kb)	-4426	ENSMUSG00000030708	Dnajb13	DnaJ heat shock protein family (Hsp40) member B13
Chr1	99857642	99858641	3.17039	0.00128715	Intron (uc007cfo.1/18484, intron 3 of 25)	15195	ENSMUSG00000026335	Pam	peptidylglycine alpha-amidating monooxygenase
Chr3	115848947	115850707	-2.3502	0.00128828	Promoter (16-17kb)	-16341	ENSMUSG00000027962	Vcam1	vascular cell adhesion molecule 1
Chr2	135774994	135776129	-2.3996	0.00129665	Exon (uc008mob.1/18798, exon 13 of 29)	-37444	ENSMUSG00000039943	Plcb4	phospholipase C, beta 4
Chr8	37807535	37809357	-2.71153	0.00130196	Promoter (11-12kb)	-11427	ENSMUSG00000031523	Dlc1	deleted in liver cancer 1
Chr5	146553446	146554445	3.29504	0.00130937	Distal Intergenic	-21734	NA	NA	NA
Chr14	42229697	42231107	-2.52593	0.00132204	Distal Intergenic	-231210	NA	NA	NA
ChrX	92248095	92249094	3.17011	0.001329	3' UTR	-26074	ENSMUSG00000071722	Spin4	spindlin family, member 4
Chr17	60405139	60407101	-3.09913	0.00134129	Distal Intergenic	-1252394	NA	NA	NA
Chr5	83441270	83442269	3.88223	0.00134243	Distal Intergenic	-213180	NA	NA	NA
Chr1	139537677	139538827	-2.75109	0.00134294	Distal Intergenic	-324205	NA	NA	NA
Chr13	25561031	25562030	2.43054	0.00136244	Distal Intergenic	-199166	NA	NA	NA
Chr3	29849863	29851011	-2.73538	0.0013748	3' UTR	45659	ENSMUSG00000027684	Mecom	MDS1 and EVI1 complex locus
Chr13	86104018	86105483	-2.34047	0.00138112	Distal Intergenic	80917	NA	NA	NA
Chr12	23142407	23143406	2.9798	0.00139595	Distal Intergenic	151710	NA	NA	NA
Chr5	80134772	80136298	-2.79104	0.00141273	Distal Intergenic	-1313298	NA	NA	NA
Chr8	72870900	72871899	2.84251	0.00145964	Intron (uc009mab.2/19704, intron 1 of 23)	5273	ENSMUSG00000058301	Upf1	UPF1 regulator of nonsense transcripts homolog (yeast)
Chr6	104252226	104253225	3.94147	0.00147761	Distal Intergenic	-189813	NA	NA	NA
Chr18	40646784	40647783	3.2276	0.00149799	Intron (uc012bch.1/383348, intron 1 of 1)	-24864	ENSMUSG00000051401	Kctd16	potassium channel tetramerisation domain containing 16
Chr6	99672594	99673927	-2.09539	0.00149931	Promoter (2-3kb)	2459	ENSMUSG00000030069	Prok2	prokineticin 2
Chr7	82232444	82234283	-2.16101	0.00154075	Distal Intergenic	218989	NA	NA	NA
Chr16	56110022	56111021	3.03315	0.00157417	Intron (uc007zmg.1/66315, intron 4 of 6)	34432	ENSMUSG00000052917	Senp7	SUMO1/sentrin specific peptidase 7
Chr1	193175674	193177553	-2.31801	0.00160184	3' UTR	25830	ENSMUSG00000026627	Pacc1	proton activated chloride channel 1
Chr1	11882869	11883868	3.50591	0.00165598	Intron (uc007ahx.2/320492, intron 10 of 13)	296637	ENSMUSG00000057715	A830018L16Rik	RIKEN cDNA A830018L16 gene
Chr16	62883858	62884857	3.46974	0.00166305	Intron (uc007zpx.1/19128, intron 1 of 14)	29698	ENSMUSG00000022912	Pros1	protein S (alpha)
Chr2	30580428	30581906	-2.31988	0.00166361	Distal Intergenic	3698	NA	NA	NA
Chr2	161096437	161098066	-2.27211	0.00167372	Distal Intergenic	-161645	NA	NA	NA
Chr7	57686748	57688427	-3.17611	0.00168241	Intron (uc012flf.1/338352, intron 8 of 9)	-166133	ENSMUSG00000084234	4933405O20Rik	RIKEN cDNA 4933405O20 gene
Chr10	115265847	115266860	-2.59244	0.00168623	Intron (uc007hbm.2/216350, intron 3 of 8)	11507	ENSMUSG00000034127	Tspan8	tetraspanin 8
Chr1	163689847	163690846	3.33811	0.00168847	Distal Intergenic	27780	NA	NA	NA
Chr11	117121782	117122781	3.02855	0.00169183	Promoter (4-5kb)	-4779	ENSMUSG00000059248	2021-09-09	septin 9
Chr5	32978038	32979037	2.37719	0.00170171	Intron (uc008wzs.1/22612, intron 11 of 12)	64432	ENSMUSG00000014932	Yes1	YES proto-oncogene 1, Src family tyrosine kinase
ChrX	124007043	124008042	3.18927	0.00170535	Distal Intergenic	78218	NA	NA	NA
Chr14	99424934	99425933	3.441	0.00171329	Distal Intergenic	19379	NA	NA	NA
Chr2	178135065	178136064	3.06192	0.00173151	Promoter (<=1kb)	655	ENSMUSG00000060445	Sycp2	synaptonemal complex protein 2
Chr8	26393084	26394343	-2.41157	0.00174275	Distal Intergenic	-41711	NA	NA	NA
Chr9	26156788	26157787	2.38418	0.00174668	Distal Intergenic	-383613	NA	NA	NA
ChrX	3100857	3101856	2.26884	0.00175838	Distal Intergenic	141773	NA	NA	NA
Chr3	31065665	31066664	3.02719	0.00176702	Distal Intergenic	16823	NA	NA	NA
Chr12	24919270	24920269	3.17598	0.00178671	Distal Intergenic	-263177	NA	NA	NA
Chr1	70897871	70899868	-2.24097	0.00179723	Intron (uc007bjk.1/320460, intron 3 of 3)	122598	ENSMUSG00000045648	Vwc2l	von Willebrand factor C domain-containing protein 2-like
Chr18	87932488	87933487	2.61491	0.00181152	Distal Intergenic	1050191	NA	NA	NA
Chr16	63608695	63609742	-2.52753	0.00181551	Intron (uc007zpy.1/13837, intron 7 of 16)	254241	ENSMUSG00000052504	Epha3	Eph receptor A3
Chr19	10621780	10622779	3.02832	0.00184514	3' UTR	7462	ENSMUSG00000024667	Tmem216	transmembrane protein 216
Chr10	108370294	108371683	-2.99721	0.00186185	Intron (uc007gzg.1/20979, intron 1 of 10)	75992	ENSMUSG00000035864	Syt1	synaptotagmin I
Chr16	12442838	12444288	-2.12747	0.00187535	Distal Intergenic	458632	NA	NA	NA
Chr2	90100222	90101221	2.43317	0.00188857	Distal Intergenic	5364	NA	NA	NA
Chr6	146503894	146505486	-2.26639	0.00188977	Exon (uc009esb.1/71177, exon 11 of 18)	20871	ENSMUSG00000040250	Ints13	integrator complex subunit 13
ChrX	29992815	29993814	2.3831	0.00189165	Distal Intergenic	-45107	NA	NA	NA
Chr17	41027296	41028305	-3.3089	0.00192655	Promoter (9-10kb)	-9789	ENSMUSG00000054951	9130008F23Rik	RIKEN cDNA 9130008F23 gene
Chr8	15519438	15520437	2.2188	0.00193078	Distal Intergenic	459248	NA	NA	NA
Chr7	108876685	108877730	-2.43091	0.0019325	Intron (uc012fqn.1/20480, intron 5 of 6)	64403	ENSMUSG00000001829	Clpb	ClpB caseinolytic peptidase B
Chr8	92926137	92927410	-2.15489	0.00194826	Distal Intergenic	-53986	NA	NA	NA
Chr13	14970299	14971334	-2.39606	0.00196278	Distal Intergenic	247774	NA	NA	NA
Chr15	7439833	7441418	-2.32497	0.00196873	Distal Intergenic	-91529	NA	NA	NA
Chr15	34161053	34162052	2.48646	0.0019779	Promoter (5-6kb)	-5729	ENSMUSG00000022257	Laptm4b	lysosomal-associated protein transmembrane 4B
Chr10	47000018	47001893	-2.75927	0.00198476	Distal Intergenic	1607673	NA	NA	NA
Chr1	173333766	173335197	-2.58589	0.00203418	Promoter (6-7kb)	-6262	ENSMUSG00000026641	Usf1	upstream transcription factor 1
Chr18	46162094	46163297	-3.40495	0.00204692	Distal Intergenic	195175	NA	NA	NA
Chr4	22034585	22036464	-2.12878	0.00208067	Distal Intergenic	176112	NA	NA	NA
ChrX	138615926	138617839	-2.19964	0.00210617	Intron (uc009ulq.1/245650, intron 2 of 19)	13635	ENSMUSG00000042282	Gucy2f	guanylate cyclase 2f
Chr7	90077997	90078996	3.81988	0.00214264	Distal Intergenic	62154	NA	NA	NA
Chr12	75496612	75498300	-2.22298	0.00216427	Distal Intergenic	98151	NA	NA	NA
Chr18	12039247	12040613	-2.52332	0.00216795	Intron (uc008ebr.2/63955, intron 1 of 9)	-40300	ENSMUSG00000084565	Mir1901	microRNA 1901
Chr13	67951848	67952878	-2.18012	0.00216812	Promoter (11-12kb)	-11396	ENSMUSG00000064063	BC048507	cDNA sequence BC048507
Chr9	46863321	46864513	-2.76717	0.00218556	Distal Intergenic	141635	NA	NA	NA
Chr2	72433447	72434996	-2.70813	0.00219593	Distal Intergenic	119171	NA	NA	NA
Chr9	94500680	94502915	-2.05791	0.00222395	Distal Intergenic	-62180	NA	NA	NA
Chr17	7882694	7883693	2.90255	0.00223673	Distal Intergenic	114146	NA	NA	NA
Chr13	76347584	76348737	-2.49829	0.00224335	Distal Intergenic	78928	NA	NA	NA
Chr5	113825825	113826824	2.93905	0.00225005	Distal Intergenic	39511	NA	NA	NA
Chr4	64362239	64363238	2.96716	0.00225822	Distal Intergenic	-421970	NA	NA	NA
Chr11	8334385	8335384	2.55245	0.0022586	3' UTR	33122	ENSMUSG00000020422	Tns3	tensin 3
Chr7	64170270	64171269	3.24662	0.00227922	Intron (uc009hdz.1/14407, intron 5 of 9)	470972	ENSMUSG00000055026	Gabrg3	gamma-aminobutyric acid (GABA) A receptor, subunit gamma 3
Chr2	59447275	59449048	-2.21584	0.00228194	Promoter (1-2kb)	-1053	ENSMUSG00000035168	Tanc1	tetratricopeptide repeat, ankyrin repeat and coiled-coil containing 1
Chr1	164797496	164798495	2.99467	0.00231923	Promoter (<=1kb)	-817	ENSMUSG00000040181	Fmo1	flavin containing monooxygenase 1
Chr11	42402190	42403749	-2.70403	0.00232057	Intron (uc007imi.1/14401, intron 6 of 9)	167487	ENSMUSG00000007653	Gabrb2	gamma-aminobutyric acid (GABA) A receptor, subunit beta 2
Chr1	108452744	108453743	3.30376	0.0023441	Intron (uc007cgx.1/uc007cgx.1, intron 2 of 4)	157124	ENSMUSG00000057329	Bcl2	B cell leukemia/lymphoma 2
Chr17	74441502	74442501	3.404	0.00237056	Distal Intergenic	-44246	NA	NA	NA
Chr9	84140518	84141517	2.64174	0.00237529	Distal Intergenic	298130	NA	NA	NA
Chr5	15502214	15503336	-2.19852	0.00238854	Intron (uc008wmw.2/12293, intron 1 of 2)	-28231	ENSMUSG00000040118	Cacna2d1	calcium channel, voltage-dependent, alpha2/delta subunit 1
Chr15	92195739	92196738	3.22585	0.00240641	Intron (uc007xin.1/uc007xin.1, intron 1 of 3)	-30503	ENSMUSG00000036218	Pdzrn4	PDZ domain containing RING finger 4
Chr3	134082497	134083496	3.33177	0.00242157	Distal Intergenic	-178892	NA	NA	NA
Chr1	150103856	150104855	4.70566	0.00242911	Distal Intergenic	1425165	NA	NA	NA
Chr6	101550978	101552848	-2.41689	0.00242989	Distal Intergenic	-171395	NA	NA	NA
Chr11	70849033	70850332	-2.62578	0.00243441	Promoter (1-2kb)	-1914	ENSMUSG00000018451	6330403K07Rik	RIKEN cDNA 6330403K07 gene
Chr16	33053863	33054862	2.56589	0.00243801	Promoter (1-2kb)	1410	ENSMUSG00000035578	Iqcg	IQ motif containing G
Chr7	63348094	63349720	-2.23535	0.00244261	Exon (uc009hdv.1/15204, exon 10 of 93)	41959	ENSMUSG00000030451	Herc2	HECT and RLD domain containing E3 ubiquitin protein ligase 2
Chr8	55915064	55916222	-2.17671	0.00246781	Distal Intergenic	-105343	NA	NA	NA
Chr4	30904626	30906381	-2.3397	0.00248578	Distal Intergenic	-1144701	NA	NA	NA
Chr8	62807810	62808974	-2.02415	0.00252383	Distal Intergenic	-175947	NA	NA	NA
Chr5	111969484	111970483	2.63238	0.00257612	Distal Intergenic	-39959	NA	NA	NA
Chr13	81870472	81871471	3.15451	0.00258302	Intron (uc007ria.1/72852, intron 1 of 1)	19943	ENSMUSG00000051098	Mblac2	metallo-beta-lactamase domain containing 2
Chr1	185961501	185962638	-2.53177	0.00261237	Distal Intergenic	103161	NA	NA	NA
Chr14	79173653	79175291	-2.4551	0.00261428	Distal Intergenic	-48757	NA	NA	NA
Chr8	105263675	105264674	2.48863	0.00262648	Intron (uc009mzu.1/12552, intron 1 of 12)	44337	ENSMUSG00000031673	Cdh11	cadherin 11
Chr3	132869369	132870760	-2.59629	0.00262996	Exon (uc008rkl.1/77669, exon 2 of 4)	27093	ENSMUSG00000040969	Arhgef38	Rho guanine nucleotide exchange factor (GEF) 38
Chr16	3252198	3253197	2.61357	0.00264887	Distal Intergenic	-339201	NA	NA	NA
Chr11	67160783	67161782	2.53536	0.00266521	Promoter (16-17kb)	-16505	ENSMUSG00000060180	Myh13	myosin, heavy polypeptide 13, skeletal muscle
ChrX	79783175	79784174	2.77989	0.00266617	Distal Intergenic	-276075	NA	NA	NA
Chr4	116589919	116590918	3.45261	0.00267523	Intron (uc008uhq.1/74464, intron 1 of 13)	39912	ENSMUSG00000033948	Zswim5	zinc finger SWIM-type containing 5
Chr6	117682451	117683727	-2.3666	0.00267584	Intron (uc009dkx.1/uc009dkx.1, intron 2 of 3)	-107533	ENSMUSG00000059689	Zfp637	zinc finger protein 637
Chr3	25337009	25338008	2.78817	0.00268905	Intron (uc008otb.1/192167, intron 4 of 5)	714221	ENSMUSG00000063887	Nlgn1	neuroligin 1
Chr4	91725677	91726726	-3.08799	0.00274406	Distal Intergenic	87186	NA	NA	NA
Chr3	86359775	86361486	-2.3405	0.00274407	Promoter (7-8kb)	-7570	ENSMUSG00000057777	Mab21l2	mab-21-like 2
Chr9	27271735	27272776	-2.55159	0.00275362	Distal Intergenic	66924	NA	NA	NA
Chr9	58899911	58900910	2.58102	0.00275825	Promoter (15-16kb)	-15663	ENSMUSG00000032340	Neo1	neogenin
Chr14	102703647	102704646	2.74684	0.00278168	Distal Intergenic	420311	NA	NA	NA
Chr11	29784563	29785960	-2.48997	0.00280461	Intron (uc007ihq.1/237711, intron 5 of 41)	-58895	ENSMUSG00000078157	4931440F15Rik	RIKEN cDNA 4931440F15 gene
Chr14	83461031	83462191	-2.328	0.00281605	Distal Intergenic	-1381179	NA	NA	NA
Chr11	42581939	42583062	-2.7136	0.00284496	Distal Intergenic	347236	NA	NA	NA
Chr11	61701125	61702331	-2.09312	0.00285181	Intron (uc007jii.1/56697, intron 11 of 14)	27437	ENSMUSG00000047804	Akap10	A kinase (PRKA) anchor protein 10
Chr15	21795582	21796643	-2.89233	0.00285398	Distal Intergenic	-682134	NA	NA	NA
Chr2	94773837	94775718	-2.02835	0.002901	Distal Intergenic	-495533	NA	NA	NA
Chr10	25440908	25442173	-2.27236	0.00290101	Distal Intergenic	-184830	NA	NA	NA
Chr9	71524178	71525177	2.50672	0.00290137	Intron (uc012gwn.1/68178, intron 6 of 16)	-45262	ENSMUSG00000032232	Cgnl1	cingulin-like 1
Chr8	110976928	110977927	2.68713	0.0029226	Distal Intergenic	-260617	NA	NA	NA
Chr1	152964747	152966963	-2.1333	0.0029357	Distal Intergenic	-124182	NA	NA	NA
Chr18	57319356	57320355	3.47071	0.00295278	Intron (uc008eyz.2/70417, intron 1 of 24)	16916	ENSMUSG00000024593	Megf10	multiple EGF-like-domains 10
Chr11	36759017	36760016	3.27354	0.00296836	Promoter (1-2kb)	-1272	ENSMUSG00000049336	Tenm2	teneurin transmembrane protein 2
Chr5	67125144	67126143	3.09522	0.00297652	Promoter (10-11kb)	-10936	ENSMUSG00000037736	Limch1	LIM and calponin homology domains 1
Chr13	70059889	70060913	-2.23543	0.00297951	Distal Intergenic	111129	NA	NA	NA
Chr3	144699917	144701322	-2.1572	0.00303942	Promoter (4-5kb)	-4177	ENSMUSG00000028255	Clca1	chloride channel accessory 1
ChrX	155362060	155363592	-2.37984	0.0030437	Distal Intergenic	-284647	NA	NA	NA
Chr15	68080180	68081825	-2.28437	0.0030543	Intron (uc007wbd.2/380993, intron 1 of 15)	8593	ENSMUSG00000022335	Zfat	zinc finger and AT hook domain containing
Chr12	22085874	22087917	-1.94175	0.00305833	Distal Intergenic	-662432	NA	NA	NA
Chr8	10078462	10079461	2.91354	0.00307594	Distal Intergenic	71829	NA	NA	NA
Chr17	92539074	92540073	2.74776	0.00308161	Distal Intergenic	-1046932	NA	NA	NA
Chr4	153739981	153741132	-2.34787	0.00308542	Intron (uc008wbu.1/70673, intron 4 of 16)	-23735	ENSMUSG00000039410	Prdm16	PR domain containing 16
Chr5	69936670	69937861	-2.3962	0.00309977	Promoter (2-3kb)	-2799	ENSMUSG00000029158	Yipf7	Yip1 domain family, member 7
Chr16	7390527	7392238	-2.29558	0.00310325	Exon (uc007yci.2/268859, exon 14 of 16)	320599	ENSMUSG00000008658	Rbfox1	RNA binding protein, fox-1 homolog (C. elegans) 1
Chr5	35471951	35473539	-2.20595	0.00310816	Distal Intergenic	-23605	NA	NA	NA
Chr10	81875223	81876795	-2.19569	0.00311766	Distal Intergenic	-171203	NA	NA	NA
Chr2	172673544	172674543	2.71628	0.0031318	Distal Intergenic	91251	NA	NA	NA
Chr3	116844734	116846065	-2.41904	0.0031469	Distal Intergenic	-172864	NA	NA	NA
Chr4	22169665	22170664	2.7824	0.00314919	Distal Intergenic	-114048	NA	NA	NA
Chr14	23103494	23105465	-1.97777	0.00317109	Intron (uc007slz.2/76633, intron 2 of 6)	264560	ENSMUSG00000063458	Lrmda	leucine rich melanocyte differentiation associated
Chr12	54151627	54152626	2.7607	0.00317348	Intron (uc007nnm.1/238161, intron 9 of 13)	195919	ENSMUSG00000061603	Akap6	A kinase (PRKA) anchor protein 6
Chr5	113410192	113411191	2.45966	0.00317926	Intron (uc008ytt.1/320129, intron 2 of 20)	33343	ENSMUSG00000042249	Grk3	G protein-coupled receptor kinase 3
Chr3	48010212	48011298	-2.85148	0.00324721	Distal Intergenic	401724	NA	NA	NA
Chr10	7591349	7592348	2.71639	0.00326017	Distal Intergenic	39081	NA	NA	NA
Chr1	17338039	17339191	-2.12951	0.00327521	Distal Intergenic	202585	NA	NA	NA
Chr12	73418611	73419610	2.60547	0.00330894	Intron (uc007nvk.1/104001, intron 1 of 8)	-80900	ENSMUSG00000021087	Rtn1	reticulon 1
Chr15	91370864	91371863	2.53384	0.00333472	Intron (uc007xhy.2/239606, intron 1 of 9)	31829	ENSMUSG00000036298	Slc2a13	solute carrier family 2 (facilitated glucose transporter), member 13
Chr7	39304412	39305411	2.51146	0.00334064	Exon (uc009gkx.1/434171, exon 3 of 3)	7801	ENSMUSG00000060565	Gm5591	predicted gene 5591
Chr7	48254744	48255828	-2.55796	0.00335243	Distal Intergenic	11765	NA	NA	NA
ChrX	122348520	122349664	-3.72764	0.00335323	Distal Intergenic	1000733	NA	NA	NA
Chr11	81239058	81240996	-2.14171	0.00335337	Intron (uc007kmm.1/11418, intron 1 of 9)	146045	ENSMUSG00000080980	1700071K01Rik	RIKEN cDNA 1700071K01 gene
Chr16	96874003	96875191	-2.13866	0.00336321	Intron (uc008add.1/13508, intron 21 of 32)	-29572	ENSMUSG00000050272	Dscam	DS cell adhesion molecule
Chr14	47322684	47323683	2.78132	0.00337694	Distal Intergenic	-56533	NA	NA	NA
Chr7	17645915	17646914	2.50366	0.00338116	Promoter (<=1kb)	862	ENSMUSG00000004328	Hif3a	hypoxia inducible factor 3, alpha subunit
ChrX	24226056	24227055	2.23324	0.00338126	Distal Intergenic	-74035	NA	NA	NA
Chr6	79838241	79839240	3.42638	0.00338833	Distal Intergenic	70216	NA	NA	NA
Chr2	52368504	52369835	-2.09046	0.00339128	Intron (uc008jra.1/12298, intron 1 of 12)	44252	ENSMUSG00000017412	Cacnb4	calcium channel, voltage-dependent, beta 4 subunit
Chr19	23481680	23483153	-2.0543	0.0034019	Intron (uc008hac.1/71738, intron 2 of 13)	39659	ENSMUSG00000033207	Mamdc2	MAM domain containing 2
Chr8	81633213	81634212	3.25473	0.00342364	Promoter (7-8kb)	-7862	ENSMUSG00000071064	Zfp827	zinc finger protein 827
Chr6	21850411	21851957	-2.59008	0.00345406	Distal Intergenic	-47658	NA	NA	NA
Chr15	96354827	96356590	-2.20482	0.00345523	Distal Intergenic	-63553	NA	NA	NA
Chr5	89327582	89328581	2.70746	0.00345828	Intron (uc008yaj.2/54403, intron 1 of 24)	11297	ENSMUSG00000060961	Slc4a4	solute carrier family 4 (anion exchanger), member 4
Chr8	10930780	10931814	-2.89938	0.00346884	Promoter (2-3kb)	-2323	ENSMUSG00000038917	3930402G23Rik	RIKEN cDNA 3930402G23 gene
Chr1	174756691	174757848	-2.73203	0.00346909	Distal Intergenic	67337	NA	NA	NA
Chr12	77053985	77055632	-2.41552	0.00348007	Exon (uc007nxp.1/319565, exon 45 of 116)	43822	ENSMUSG00000063450	Syne2	spectrin repeat containing, nuclear envelope 2
Chr5	12765297	12766933	-2.07489	0.00351668	Distal Intergenic	-358481	NA	NA	NA
Chr4	70182947	70184147	-3.25227	0.00355084	Intron (uc008tib.1/230316, intron 1 of 5)	11815	ENSMUSG00000039270	Megf9	multiple EGF-like-domains 9
Chr3	148367014	148368013	2.98518	0.00355248	Distal Intergenic	118002	NA	NA	NA
Chr3	52132015	52133084	-2.32614	0.003598	Intron (uc008pei.2/56458, intron 1 of 2)	59756	ENSMUSG00000044167	Foxo1	forkhead box O1
Chr9	120946806	120947805	2.83421	0.00361203	Intron (uc012hco.1/209012, intron 35 of 36)	81870	ENSMUSG00000006932	Ctnnb1	catenin (cadherin associated protein), beta 1
Chr4	77316326	77317325	3.5774	0.00361408	Intron (uc008tjp.1/19266, intron 2 of 14)	540474	ENSMUSG00000028399	Ptprd	protein tyrosine phosphatase, receptor type, D
Chr15	76685699	76686934	-2.06539	0.00364507	Promoter (2-3kb)	-2349	ENSMUSG00000022526	Zfp251	zinc finger protein 251
Chr5	27920221	27921220	3.40279	0.00372267	Intron (uc008wtk.2/13483, intron 7 of 25)	59904	ENSMUSG00000061576	Dpp6	dipeptidylpeptidase 6
Chr10	111191548	111193433	-2.27846	0.00372717	Distal Intergenic	-216318	NA	NA	NA
Chr11	22332992	22334110	-2.50656	0.0037384	Distal Intergenic	-78176	NA	NA	NA
Chr4	153375012	153376011	2.82943	0.00374245	Promoter (9-10kb)	-9901	ENSMUSG00000029028	Lrrc47	leucine rich repeat containing 47
Chr8	80095749	80096748	2.20459	0.00376264	Exon (uc009mhq.1/102182, exon 9 of 12)	22453	ENSMUSG00000037134	Prmt9	protein arginine methyltransferase 9
Chr2	14177361	14178360	3.43574	0.00376381	Promoter (4-5kb)	-4270	ENSMUSG00000077897	Mir511	microRNA 511
Chr9	75573355	75574663	-2.10319	0.00379148	Distal Intergenic	-41492	NA	NA	NA
Chr8	62930114	62931137	-3.11648	0.00383555	Distal Intergenic	-53784	NA	NA	NA
Chr7	150756920	150757919	2.44047	0.00384732	Exon (uc009kpn.1/27267, exon 11 of 23)	-21925	ENSMUSG00000059119	Nap1l4	nucleosome assembly protein 1-like 4
Chr13	31307159	31308509	-2.04296	0.00385	Distal Intergenic	-241243	NA	NA	NA
Chr8	28331707	28333488	-2.1541	0.00385054	Downstream (2-3kb)	5734	ENSMUSG00000031489	Adrb3	adrenergic receptor, beta 3
Chr11	116383413	116384567	-2.14565	0.00385164	Promoter (8-9kb)	-8658	ENSMUSG00000061878	Sphk1	sphingosine kinase 1
Chr4	132011213	132012212	2.88206	0.00386051	Downstream (2-3kb)	7624	ENSMUSG00000066042	Med18	mediator complex subunit 18
Chr15	41652807	41653806	2.36513	0.00388028	Promoter (8-9kb)	-8698	ENSMUSG00000022307	Oxr1	oxidation resistance 1
Chr10	127051365	127052364	2.93097	0.00389487	Intron (uc007hjx.1/16971, intron 1 of 88)	5840	ENSMUSG00000040249	Lrp1	low density lipoprotein receptor-related protein 1
Chr7	149206260	149207259	3.04644	0.00391349	Promoter (3-4kb)	-3850	ENSMUSG00000025147	Mob2	MOB kinase activator 2
Chr15	87289852	87290851	2.8225	0.00394416	Distal Intergenic	-83878	NA	NA	NA
Chr1	120909854	120910853	2.78236	0.00395335	Intron (uc007cim.1/14633, intron 1 of 13)	39343	ENSMUSG00000048402	Gli2	GLI-Kruppel family member GLI2
Chr13	78200468	78201478	-2.29162	0.00395923	Intron (uc007rgy.2/68675, intron 10 of 10)	36305	ENSMUSG00000093668	Pou5f2	POU domain class 5, transcription factor 2
Chr8	71946424	71947423	2.65657	0.00396674	Distal Intergenic	151445	NA	NA	NA
Chr6	98300847	98301846	3.11005	0.00396727	Promoter (8-9kb)	-8099	ENSMUSG00000090667	Gm765	predicted gene 765
Chr12	37302655	37305166	-2.10248	0.00399224	Intron (uc007nkb.2/75847, intron 9 of 9)	193921	ENSMUSG00000043153	Crppa	CDP-L-ribitol pyrophosphorylase A
Chr5	24618371	24619370	2.28675	0.00400014	Distal Intergenic	11578	NA	NA	NA
Chr16	80234114	80235113	3.09794	0.00402409	Distal Intergenic	-965829	NA	NA	NA
Chr7	129425702	129427565	-2.05055	0.00402599	Promoter (5-6kb)	-5074	ENSMUSG00000052889	Prkcb	protein kinase C, beta
Chr12	82379270	82380269	1.92822	0.00402674	Intron (uc007obv.2/110893, intron 2 of 7)	53898	ENSMUSG00000079055	Slc8a3	solute carrier family 8 (sodium/calcium exchanger), member 3
Chr14	47540922	47541921	2.43799	0.00404864	Intron (uc007thn.2/74480, intron 2 of 12)	37072	ENSMUSG00000021838	Samd4	sterile alpha motif domain containing 4
Chr5	50175367	50176510	-2.22861	0.00405179	Distal Intergenic	273725	NA	NA	NA
Chr17	28404913	28405912	2.46965	0.00410151	Intron (uc008bqj.1/19015, intron 2 of 3)	35214	ENSMUSG00000002250	Ppard	peroxisome proliferator activator receptor delta
Chr14	30384836	30386134	-2.06049	0.00410156	Intron (uc007sui.1/12294, intron 2 of 37)	148916	ENSMUSG00000021991	Cacna2d3	calcium channel, voltage-dependent, alpha2/delta subunit 3
Chr15	89177039	89178380	-2.20114	0.00413564	Distal Intergenic	7663	NA	NA	NA
Chr10	126643113	126644205	-2.27033	0.00414646	3' UTR	4473	ENSMUSG00000025417	Pip4k2c	phosphatidylinositol-5-phosphate 4-kinase, type II, gamma
Chr3	38334427	38335426	3.06194	0.00414769	Intron (uc008pba.1/uc008pba.1, intron 1 of 2)	19343	ENSMUSG00000044864	Ankrd50	ankyrin repeat domain 50
Chr19	37407797	37408796	2.51118	0.00419203	Promoter (2-3kb)	-2695	ENSMUSG00000056999	Ide	insulin degrading enzyme
Chr4	145174654	145175653	2.61213	0.0041927	Distal Intergenic	-31368	NA	NA	NA
ChrX	20172086	20173085	3.11114	0.00419563	Distal Intergenic	-21544	NA	NA	NA
Chr1	164344634	164345633	2.95116	0.00421396	Intron (uc007dga.2/103967, intron 1 of 20)	62532	ENSMUSG00000040265	Dnm3	dynamin 3
Chr7	86346580	86347579	2.77077	0.0042168	Distal Intergenic	-52634	NA	NA	NA
Chr8	48333358	48334357	2.66189	0.00421791	Intron (uc009lqw.2/71069, intron 1 of 4)	-27811	ENSMUSG00000038143	Stox2	storkhead box 2
Chr1	175930624	175931719	-2.19813	0.00424312	Promoter (17-18kb)	-17649	ENSMUSG00000026535	Ifi202b	interferon activated gene 202B
Chr1	3203510	3204509	2.75094	0.00425292	Promoter (1-2kb)	1204	ENSMUSG00000051951	Xkr4	X-linked Kx blood group related 4
Chr11	66381821	66382820	2.49925	0.00428748	Distal Intergenic	-42193	NA	NA	NA
ChrX	123062510	123063509	2.85336	0.00430687	Distal Intergenic	286888	NA	NA	NA
Chr18	59073052	59074051	2.70354	0.00430849	Intron (uc008ezs.1/240322, intron 6 of 22)	76634	ENSMUSG00000053441	Adamts19	a disintegrin-like and metallopeptidase (reprolysin type) with thrombospondin type 1 motif, 19
Chr3	28907638	28908637	2.56914	0.0043375	Distal Intergenic	-72862	NA	NA	NA
Chr8	10185106	10186105	2.12088	0.00436245	Intron (uc009kur.1/244281, intron 1 of 35)	31183	ENSMUSG00000039057	Myo16	myosin XVI
Chr12	62678045	62680005	-2.05187	0.00436631	Intron (uc007nqm.1/238205, intron 1 of 3)	52426	ENSMUSG00000035653	Lrfn5	leucine rich repeat and fibronectin type III domain containing 5
Chr4	99199127	99200126	2.29854	0.00437551	Distal Intergenic	-122864	NA	NA	NA
Chr7	4853075	4854671	-2.14855	0.00438243	Promoter (12-13kb)	-12148	ENSMUSG00000074406	Zfp628	zinc finger protein 628
Chr9	63294127	63295193	-2.59691	0.00438928	Intron (uc009qbc.1/uc009qbc.1, intron 1 of 4)	-47076	ENSMUSG00000032403	2300009A05Rik	RIKEN cDNA 2300009A05 gene
Chr5	149362299	149363850	-1.9835	0.00439416	Promoter (<=1kb)	514	ENSMUSG00000001687	Ubl3	ubiquitin-like 3
Chr19	40024201	40025200	2.57171	0.00439866	Distal Intergenic	-41714	NA	NA	NA
Chr1	99101748	99102807	-2.05971	0.00441532	Distal Intergenic	-76868	NA	NA	NA
Chr17	33424891	33425890	2.65626	0.0044545	Promoter (<=1kb)	-599	ENSMUSG00000096910	Zfp955b	zinc finger protein 955B
Chr1	168800430	168801465	-2.55187	0.00445527	Distal Intergenic	-130083	NA	NA	NA
Chr18	67690486	67691504	-2.25664	0.00445751	Promoter (14-15kb)	-14075	ENSMUSG00000024533	Spire1	spire type actin nucleation factor 1
Chr14	90038473	90040097	-2.32465	0.00447526	Distal Intergenic	-255934	NA	NA	NA
Chr17	11164100	11165099	2.43997	0.00448163	Intron (uc008akj.1/50873, intron 1 of 6)	130850	ENSMUSG00000023826	Prkn	parkin RBR E3 ubiquitin protein ligase
Chr13	102537550	102538596	-1.98715	0.00450134	Promoter (<=1kb)	0	ENSMUSG00000041417	Pik3r1	phosphoinositide-3-kinase regulatory subunit 1
Chr9	70955816	70956815	3.05461	0.00453402	Downstream (1-2kb)	53625	ENSMUSG00000032204	Aqp9	aquaporin 9
ChrX	100215942	100217174	-1.95787	0.00454116	Distal Intergenic	-86380	NA	NA	NA
Chr4	12440861	12441860	2.98517	0.00457342	Distal Intergenic	-341699	NA	NA	NA
Chr3	137853937	137854950	-2.32636	0.00458332	Promoter (4-5kb)	-4260	ENSMUSG00000012042	4930579F01Rik	RIKEN cDNA 4930579F01 gene
Chr3	96577387	96579189	-2.44711	0.00460174	Intron (uc008qoe.2/67845, intron 3 of 8)	39255	ENSMUSG00000038304	Cd160	CD160 antigen
Chr9	50466392	50467391	2.4775	0.00464143	Promoter (<=1kb)	494	ENSMUSG00000000168	Dlat	dihydrolipoamide S-acetyltransferase (E2 component of pyruvate dehydrogenase complex)
Chr3	96271231	96272230	2.51544	0.00467353	Distal Intergenic	-52475	NA	NA	NA
Chr16	79974168	79975167	3.30405	0.00471312	Distal Intergenic	-882826	NA	NA	NA
Chr4	51295566	51296565	3.2698	0.00473813	Distal Intergenic	66016	NA	NA	NA
Chr6	105545380	105546552	-2.36759	0.00475691	Distal Intergenic	-81187	NA	NA	NA
Chr1	70557065	70558064	3.00646	0.00475813	Intron (uc007bjh.1/66722, intron 16 of 16)	-214225	ENSMUSG00000045648	Vwc2l	von Willebrand factor C domain-containing protein 2-like
Chr3	71776025	71777024	3.02406	0.00478002	Distal Intergenic	978604	NA	NA	NA
Chr10	77583689	77584688	3.13835	0.00479298	Distal Intergenic	47825	NA	NA	NA
Chr5	122996362	122998247	-2.14995	0.00482874	Downstream (1-2kb)	12571	ENSMUSG00000029469	Ift81	intraflagellar transport 81
Chr4	109923354	109924419	-2.83033	0.00485135	Exon (uc008ucw.1/15572, exon 2 of 7)	35020	ENSMUSG00000028546	Elavl4	ELAV like RNA binding protein 4
Chr16	93154182	93155745	-2.027	0.00488289	Distal Intergenic	-214220	NA	NA	NA
Chr1	40778163	40779442	-2.52029	0.00488304	Intron (uc007aum.1/226999, intron 2 of 2)	39606	ENSMUSG00000026062	Slc9a2	solute carrier family 9 (sodium/hydrogen exchanger), member 2
Chr4	33084978	33085977	2.30706	0.00488507	Promoter (2-3kb)	2836	ENSMUSG00000028278	Rragd	Ras-related GTP binding D
Chr15	32074720	32075719	3.55045	0.00488554	Distal Intergenic	-31325	NA	NA	NA
ChrX	115850296	115851743	-2.39041	0.00489991	Distal Intergenic	-255950	NA	NA	NA
Chr8	107296271	107297537	-2.42253	0.00490233	Distal Intergenic	38368	NA	NA	NA
Chr15	49715709	49716708	2.93179	0.00490339	Distal Intergenic	942359	NA	NA	NA
Chr13	80798841	80799890	-2.24064	0.0049246	Distal Intergenic	-222793	NA	NA	NA
Chr13	115641709	115642761	-1.90288	0.00492697	Intron (uc007rxw.1/16398, intron 23 of 29)	33264	ENSMUSG00000015536	Mocs2	molybdenum cofactor synthesis 2
Chr10	122254046	122255493	-2.12173	0.0049625	Intron (uc007hgf.2/319468, intron 4 of 5)	138228	ENSMUSG00000034613	Ppm1h	protein phosphatase 1H (PP2C domain containing)
Chr9	119913610	119914609	2.74648	0.00496862	Distal Intergenic	18107	NA	NA	NA
Chr12	89512257	89513256	2.57043	0.00497617	Promoter (<=1kb)	0	ENSMUSG00000079029	Gm5662	predicted gene 5662
Chr15	41391707	41392706	2.04634	0.00498919	Intron (uc007vot.2/170719, intron 2 of 16)	111134	ENSMUSG00000022307	Oxr1	oxidation resistance 1
Chr3	105172667	105174204	-2.2222	0.00498982	Distal Intergenic	-81044	NA	NA	NA
Chr14	10008008	10011601	-1.79965	0.00499651	Distal Intergenic	-509204	NA	NA	NA
Chr4	127734065	127735320	-2.00624	0.00499782	Intron (uc008uuy.1/uc008uuy.1, intron 1 of 12)	-85980	ENSMUSG00000028813	CK137956	cDNA sequence CK137956
Chr11	19583370	19584411	-2.88589	0.0050685	Distal Intergenic	-240034	NA	NA	NA
Chr3	52297182	52298181	2.78217	0.00507196	Distal Intergenic	224923	NA	NA	NA
Chr2	136192430	136193429	3.56499	0.00508003	Intron (uc008moh.1/241656, intron 1 of 9)	20274	ENSMUSG00000039913	Pak7	p21 (RAC1) activated kinase 7
Chr1	174112945	174113944	2.3186	0.00509954	Intron (uc007dps.2/98193, intron 7 of 9)	22968	ENSMUSG00000013698	Pea15a	phosphoprotein enriched in astrocytes 15A
Chr6	100972675	100974174	-2.20515	0.00513	Distal Intergenic	170196	NA	NA	NA
Chr3	75170022	75171184	-2.50805	0.00513433	Distal Intergenic	-96022	NA	NA	NA
Chr9	106725885	106727664	-2.43609	0.00515472	Promoter (1-2kb)	1578	ENSMUSG00000040325	Dcaf1	DDB1 and CUL4 associated factor 1
Chr1	28364978	28365977	3.17996	0.00518719	Distal Intergenic	471120	NA	NA	NA
Chr1	64760193	64761808	-2.01172	0.00519776	Exon (uc007bgx.1/227210, exon 7 of 10)	22406	ENSMUSG00000070871	Ccnyl1	cyclin Y-like 1
Chr17	10645276	10646518	-2.61062	0.00523943	Intron (uc008akg.1/69310, intron 4 of 4)	132492	NA	Cahm	colon adenocarcinoma hypermethylated RNA
ChrX	107605517	107606516	3.08176	0.00524326	Distal Intergenic	37425	NA	NA	NA
Chr7	19613243	19614761	-1.84435	0.00526783	5' UTR	3517	ENSMUSG00000023118	Sympk	symplekin
Chr17	86597332	86598331	3.03233	0.00527651	Intron (uc008dug.2/18754, intron 1 of 14)	29818	ENSMUSG00000045038	Prkce	protein kinase C, epsilon
Chr5	105637560	105638579	-2.42434	0.00528291	Intron (uc012eaf.1/17472, intron 1 of 10)	29973	ENSMUSG00000105096	Gbp10	guanylate-binding protein 10
Chr9	93423570	93425014	-2.33066	0.00531089	Distal Intergenic	-985863	NA	NA	NA
Chr2	117445031	117446030	2.73839	0.00531383	Distal Intergenic	-276418	NA	NA	NA
Chr16	71513458	71514591	-2.39898	0.00531929	Distal Intergenic	-1148803	NA	NA	NA
Chr14	122917271	122919081	1.95622	0.00532969	Promoter (14-15kb)	-14469	ENSMUSG00000041650	Pcca	propionyl-Coenzyme A carboxylase, alpha polypeptide
Chr1	104141911	104142964	-2.30611	0.00535225	Distal Intergenic	2147573	NA	NA	NA
Chr16	98260833	98261832	2.69538	0.0053772	Intron (uc008aea.1/320586, intron 3 of 3)	41325	ENSMUSG00000116673	A630089N07Rik	RIKEN cDNA A630089N07 gene
Chr5	24435246	24436245	2.63286	0.0053836	Intron (uc008wsl.2/108099, intron 2 of 13)	-20919	ENSMUSG00000028944	Prkag2	protein kinase, AMP-activated, gamma 2 non-catalytic subunit
Chr12	37356077	37357076	2.29256	0.0053946	Intron (uc007nkb.2/75847, intron 9 of 9)	247343	ENSMUSG00000043153	Crppa	CDP-L-ribitol pyrophosphorylase A
ChrX	57824068	57825729	-2.37865	0.00540946	Exon (uc009tie.1/uc009tie.1, exon 7 of 15)	-114698	ENSMUSG00000079583	Gm7073	predicted gene 7073
Chr7	116977460	116978459	2.02958	0.00542173	Intron (uc009jeh.2/56788, intron 3 of 16)	5982	ENSMUSG00000007279	Scube2	signal peptide, CUB domain, EGF-like 2
Chr3	12453404	12454543	-2.90926	0.00542555	Distal Intergenic	-1017112	NA	NA	NA
Chr1	27996200	27997724	-2.28003	0.00542758	Distal Intergenic	839373	NA	NA	NA
ChrX	77598819	77600018	-2.51528	0.00546382	Distal Intergenic	-682045	NA	NA	NA
Chr5	90222838	90223837	2.79297	0.00546708	Intron (uc008yaq.2/330119, intron 3 of 21)	88522	ENSMUSG00000043635	Adamts3	a disintegrin-like and metallopeptidase (reprolysin type) with thrombospondin type 1 motif, 3
Chr14	88024678	88026248	-2.2561	0.00548466	Distal Intergenic	208288	NA	NA	NA
Chr19	21460940	21461969	-2.65388	0.00548647	Distal Intergenic	85182	NA	NA	NA
Chr8	87241138	87242339	-2.42535	0.00550573	Intron (uc009mnc.1/18032, intron 8 of 10)	15782	ENSMUSG00000034041	Lyl1	lymphoblastomic leukemia 1
ChrX	165771716	165772741	-2.29943	0.00552195	Promoter (13-14kb)	-13412	ENSMUSG00000031352	Hccs	holocytochrome c synthetase
Chr3	80192706	80193705	3.06919	0.00553525	Distal Intergenic	351415	NA	NA	NA
Chr17	79747030	79748845	-2.10229	0.00567651	Intron (uc008dpx.1/260409, intron 1 of 1)	5586	ENSMUSG00000036533	Cdc42ep3	CDC42 effector protein (Rho GTPase binding) 3
Chr17	13399003	13400002	2.0044	0.00567801	Promoter (1-2kb)	1095	ENSMUSG00000117051	Gm10512	predicted gene 10512
Chr5	91135787	91136983	-3.0548	0.00570519	Distal Intergenic	-51342	NA	NA	NA
Chr4	8532383	8534014	-2.21366	0.00574765	3' UTR	44084	ENSMUSG00000047187	Rab2a	RAB2A, member RAS oncogene family
Chr8	95913818	95914957	-2.67643	0.00578746	Distal Intergenic	-52710	NA	NA	NA
Chr17	90389637	90390706	-2.44511	0.00578803	Distal Intergenic	638902	NA	NA	NA
Chr17	80455199	80456198	2.46874	0.00579883	Intron (uc008dqk.1/72692, intron 1 of 12)	5476	ENSMUSG00000024095	Hnrnpll	heterogeneous nuclear ribonucleoprotein L-like
ChrX	4673654	4674653	2.01217	0.00583118	Distal Intergenic	227127	NA	NA	NA
Chr1	25803365	25805081	-1.97546	0.00583494	Intron (uc007amw.2/210933, intron 1 of 28)	78539	ENSMUSG00000033569	Adgrb3	adhesion G protein-coupled receptor B3
Chr18	47139478	47141256	-2.08207	0.00585324	Intron (uc008evz.1/69456, intron 4 of 6)	20948	ENSMUSG00000042705	Commd10	COMM domain containing 10
Chr16	97392048	97393047	4.1646	0.00585372	Promoter (<=1kb)	0	ENSMUSG00000050272	Dscam	DS cell adhesion molecule
Chr16	3267836	3268835	2.00089	0.00586678	Distal Intergenic	-323563	NA	NA	NA
Chr9	44145484	44146939	-2.10838	0.00587054	Promoter (2-3kb)	2686	ENSMUSG00000049932	H2afx	H2A histone family, member X
Chr15	14249585	14250704	-2.26277	0.00587756	Distal Intergenic	-1146191	NA	NA	NA
Chr14	19993847	19994846	2.68484	0.0058824	Distal Intergenic	-267706	NA	NA	NA
Chr9	8355357	8356430	-2.06112	0.00589904	Distal Intergenic	108571	NA	NA	NA
Chr1	27439980	27440979	2.46281	0.00590043	Distal Intergenic	-695675	NA	NA	NA
ChrX	28285194	28286193	2.68409	0.00590913	Distal Intergenic	-26253	NA	NA	NA
Chr10	47727838	47728837	2.53772	0.00591772	Distal Intergenic	1779723	NA	NA	NA
Chr13	8241173	8242717	-1.79634	0.00594178	Intron (uc007pkf.1/94191, intron 1 of 9)	39018	ENSMUSG00000052551	Adarb2	adenosine deaminase, RNA-specific, B2
Chr7	17663377	17665444	-2.42622	0.00595033	Intron (uc009veh.1/26436, intron 1 of 4)	3988	ENSMUSG00000066760	Psg16	pregnancy specific glycoprotein 16
Chr17	63072041	63073082	-2.43894	0.00595135	Intron (uc008dfg.2/13640, intron 1 of 4)	-35693	ENSMUSG00000048915	Efna5	ephrin A5
Chr7	145627838	145629257	-2.26153	0.00596969	Distal Intergenic	-38425	NA	NA	NA
Chr11	80976333	80977594	-1.99092	0.00603778	Promoter (9-10kb)	-9928	ENSMUSG00000020704	Asic2	acid-sensing (proton-gated) ion channel 2
Chr2	39678097	39679935	-2.94226	0.00605438	Distal Intergenic	-596239	NA	NA	NA
Chr7	117951456	117953445	-2.03444	0.00606165	Exon (uc009jfl.1/11717, exon 13 of 15)	27598	ENSMUSG00000030788	Rnf141	ring finger protein 141
Chr5	117083357	117084589	-2.14952	0.00610119	Distal Intergenic	-41531	NA	NA	NA
Chr14	66667529	66668644	-2.32326	0.00611383	Intron (uc007uju.1/11495, intron 12 of 20)	27926	ENSMUSG00000022039	Adam2	a disintegrin and metallopeptidase domain 2
Chr6	146763735	146764734	2.76685	0.00613143	Intron (uc009esj.1/272322, intron 5 of 14)	9683	ENSMUSG00000040187	Arntl2	aryl hydrocarbon receptor nuclear translocator-like 2
Chr1	156470901	156472546	-2.07583	0.00613168	Intron (uc007dav.1/12290, intron 6 of 46)	100504	ENSMUSG00000004110	Cacna1e	calcium channel, voltage-dependent, R type, alpha 1E subunit
Chr19	26212422	26215155	-2.15557	0.0061472	Distal Intergenic	-464495	NA	NA	NA
Chr3	19568266	19569265	2.80365	0.00615805	Intron (uc008orw.1/381485, intron 4 of 9)	23806	ENSMUSG00000060913	Trim55	tripartite motif-containing 55
Chr14	124693032	124694031	2.9608	0.00620291	Intron (uc007vbw.2/14169, intron 1 of 4)	-101264	ENSMUSG00000025551	Fgf14	fibroblast growth factor 14
Chr16	30893444	30894494	-2.85464	0.0062054	Distal Intergenic	187024	NA	NA	NA
Chr3	131545692	131546825	-2.19043	0.0062092	Intron (uc008rjv.1/uc008rjv.1, intron 1 of 3)	-201431	ENSMUSG00000028031	Dkk2	dickkopf WNT signaling pathway inhibitor 2
Chr10	110655236	110656957	-1.97934	0.00621611	Intron (uc007gzx.1/237542, intron 2 of 5)	53378	ENSMUSG00000020189	Osbpl8	oxysterol binding protein-like 8
ChrX	23985381	23987042	-1.99428	0.00623531	Distal Intergenic	90844	NA	NA	NA
Chr9	25355248	25356863	-1.86442	0.0062426	Intron (uc009opn.1/67484, intron 3 of 7)	66066	ENSMUSG00000036611	Eepd1	endonuclease/exonuclease/phosphatase family domain containing 1
Chr1	45651699	45653497	-2.14164	0.0062681	Distal Intergenic	-91572	NA	NA	NA
Chr3	61333911	61335004	-2.42602	0.00627201	Distal Intergenic	165482	NA	NA	NA
ChrX	47142411	47144145	-2.1942	0.00627897	Promoter (<=1kb)	-991	ENSMUSG00000031111	Igsf1	immunoglobulin superfamily, member 1
Chr17	89872313	89873312	3.19914	0.00629887	Distal Intergenic	-272298	NA	NA	NA
ChrX	148989147	148990146	2.98069	0.00630667	Promoter (7-8kb)	-7731	ENSMUSG00000091863	Cldn34a	claudin 34A
Chr7	139352977	139354206	-2.07635	0.00631186	Promoter (6-7kb)	-6553	ENSMUSG00000030862	Cpxm2	carboxypeptidase X 2 (M14 family)
Chr5	114423147	114424813	-1.78726	0.00633801	Intron (uc008yyx.1/231637, intron 1 of 13)	14939	ENSMUSG00000042121	Ssh1	slingshot protein phosphatase 1
Chr2	89881692	89882764	-2.61605	0.00638282	Distal Intergenic	4614	NA	NA	NA
Chr6	78939624	78940623	2.53447	0.00638803	Distal Intergenic	-520756	NA	NA	NA
Chr12	30224656	30225840	-2.07541	0.00639412	Intron (uc007ngd.1/17933, intron 1 of 24)	4886	ENSMUSG00000061911	Myt1l	myelin transcription factor 1-like
Chr7	77146153	77147917	-1.89938	0.00640469	Distal Intergenic	357562	NA	NA	NA
Chr6	6630809	6631821	-3.12015	0.00645316	Distal Intergenic	-102151	NA	NA	NA
Chr9	89800512	89801511	2.54222	0.00647126	Promoter (3-4kb)	-3102	ENSMUSG00000032356	Rasgrf1	RAS protein-specific guanine nucleotide-releasing factor 1
Chr14	23341592	23342799	-2.20742	0.00659446	Intron (uc007slz.2/76633, intron 2 of 6)	-60829	ENSMUSG00000063458	Lrmda	leucine rich melanocyte differentiation associated
Chr3	130927265	130928572	-2.16859	0.00662558	Distal Intergenic	46383	NA	NA	NA
Chr3	54384815	54386647	-1.66037	0.00664664	Distal Intergenic	-110133	NA	NA	NA
Chr10	48359652	48360651	2.48747	0.00667077	Distal Intergenic	1147909	NA	NA	NA
Chr5	20742554	20744455	1.9111	0.00668186	Intron (uc008woi.1/212167, intron 12 of 18)	50469	ENSMUSG00000039934	Gsap	gamma-secretase activating protein
ChrX	140957542	140958541	2.94663	0.00671446	5' UTR	32241	NA	Mageb16-ps1	melanoma antigen family B, 16, pseudogene 1
Chr6	57131946	57133608	-2.11459	0.00672092	Distal Intergenic	23032	NA	NA	NA
Chr19	51664656	51666185	-2.5022	0.00673642	Distal Intergenic	-672628	NA	NA	NA
Chr5	145831713	145833715	-1.94337	0.0067549	Promoter (11-12kb)	-11023	ENSMUSG00000029621	Arpc1a	actin related protein 2/3 complex, subunit 1A
Chr3	22778628	22779627	2.04912	0.00675979	Distal Intergenic	628765	NA	NA	NA
Chr5	64321805	64323390	-1.76541	0.00676608	Intron (uc008xmh.1/100532, intron 3 of 6)	36746	ENSMUSG00000047881	Rell1	RELT-like 1
Chr13	57167129	57168167	-1.97481	0.00679949	Distal Intergenic	-170180	NA	NA	NA
Chr3	20797184	20798183	2.69662	0.00680142	Distal Intergenic	-531085	NA	NA	NA
Chr10	115529782	115530781	2.23861	0.00681032	Intron (uc007hbp.2/19279, intron 2 of 13)	20192	ENSMUSG00000074734	Taf7l2	Taf7l2
Chr14	105393110	105394876	-1.78303	0.00681557	Distal Intergenic	119017	NA	NA	NA
Chr1	8181465	8182464	2.28427	0.00681646	Distal Intergenic	278136	NA	NA	NA
Chr11	117879122	117880316	-2.09615	0.00682696	Promoter (<=1kb)	-605	ENSMUSG00000017715	Pgs1	phosphatidylglycerophosphate synthase 1
Chr14	30749239	30751017	-1.87742	0.0068534	Distal Intergenic	-30549	NA	NA	NA
Chr1	28842045	28843432	-2.53888	0.00687939	Promoter (4-5kb)	-4948	ENSMUSG00000048411	Gm597	predicted gene 597
Chr9	4818527	4820021	-2.31224	0.00688307	Distal Intergenic	-22293	NA	NA	NA
Chr8	55329782	55331695	-2.23226	0.00691146	Distal Intergenic	166896	NA	NA	NA
Chr12	67888134	67889533	-2.46694	0.00699203	Intron (uc007nrl.2/320772, intron 3 of 15)	434003	ENSMUSG00000034912	Mdga2	MAM domain containing glycosylphosphatidylinositol anchor 2
Chr14	43653163	43654162	1.94157	0.00699959	Distal Intergenic	372182	NA	NA	NA
Chr8	81844110	81845109	2.20622	0.00700928	Distal Intergenic	-25255	NA	NA	NA
Chr2	128596012	128597127	-2.33945	0.00704643	Promoter (<=1kb)	0	ENSMUSG00000014361	Mertk	MER proto-oncogene tyrosine kinase
Chr6	51128611	51130366	-2.20956	0.0070768	Distal Intergenic	89543	NA	NA	NA
Chr2	142786259	142788250	-1.8929	0.00708409	Distal Intergenic	-59059	NA	NA	NA
Chr7	64998256	65000241	-2.29075	0.00708591	Intron (uc009hed.1/14402, intron 3 of 8)	151713	ENSMUSG00000033676	Gabrb3	gamma-aminobutyric acid (GABA) A receptor, subunit beta 3
Chr1	101981472	101982564	-2.20052	0.00710018	Promoter (11-12kb)	-11774	ENSMUSG00000067028	Cntnap5b	contactin associated protein-like 5B
Chr1	4386773	4388043	-2.45328	0.00710527	Intron (uc007aew.1/19888, intron 1 of 3)	11279	ENSMUSG00000025900	Rp1	retinitis pigmentosa 1 (human)
Chr4	23887254	23888493	-2.39607	0.00710679	Distal Intergenic	-535116	NA	NA	NA
Chr16	52880051	52881107	-2.41773	0.00712915	Distal Intergenic	-426941	NA	NA	NA
Chr6	76099245	76100884	-2.27884	0.00712991	Distal Intergenic	-1091827	NA	NA	NA
Chr11	67353244	67354243	2.81761	0.00715968	Intron (uc011xwn.1/14457, intron 1 of 13)	6744	ENSMUSG00000033066	Gas7	growth arrest specific 7
Chr19	50980667	50982493	-1.88333	0.00722539	Distal Intergenic	-227565	NA	NA	NA
Chr3	60311924	60313094	-2.07879	0.00722896	Intron (uc008pjb.1/56758, intron 1 of 8)	6750	ENSMUSG00000027763	Mbnl1	muscleblind like splicing factor 1
Chr9	22672512	22673618	-2.28468	0.00725715	Intron (uc009oor.1/319845, intron 20 of 21)	209788	ENSMUSG00000035919	Bbs9	Bardet-Biedl syndrome 9 (human)
Chr1	3049253	3050252	2.83711	0.00725739	Distal Intergenic	155461	NA	NA	NA
Chr2	99190070	99191998	-2.4474	0.00726453	Distal Intergenic	1882239	NA	NA	NA
Chr4	105199864	105201432	-2.15856	0.00729284	Distal Intergenic	369912	NA	NA	NA
Chr16	21574295	21575294	3.14756	0.00729287	Exon (uc007yrj.1/209018, exon 42 of 47)	42942	ENSMUSG00000033653	Vps8	VPS8 CORVET complex subunit
Chr2	144512932	144514411	-2.21186	0.00732546	Intron (uc008mro.2/66044, intron 4 of 5)	87243	ENSMUSG00000027430	Dtd1	D-tyrosyl-tRNA deacylase 1
Chr17	43739933	43740932	2.65879	0.00732775	Intron (uc008cpd.1/27226, intron 9 of 10)	26316	ENSMUSG00000040140	Tdrd6	tudor domain containing 6
Chr9	68958067	68959066	3.01073	0.00733317	Intron (uc009qmx.1/19883, intron 1 of 10)	-86249	ENSMUSG00000032238	Rora	RAR-related orphan receptor alpha
Chr9	119576696	119578096	-2.02119	0.00733628	Intron (uc009sbg.2/20264, intron 7 of 26)	19061	ENSMUSG00000034533	Scn10a	sodium channel, voltage-gated, type X, alpha
Chr2	121492866	121493915	-2.34612	0.00734501	Intron (uc008lzk.1/228564, intron 1 of 14)	96929	ENSMUSG00000027238	Frmd5	FERM domain containing 5
Chr12	3461019	3462538	-2.33255	0.00738187	Intron (uc007mwq.1/75302, intron 4 of 10)	9360	ENSMUSG00000037486	Asxl2	additional sex combs like 2, transcriptional regulator
Chr1	89377459	89378849	-1.96586	0.00739198	Exon (uc007bwx.2/53972, exon 9 of 13)	10620	ENSMUSG00000026258	Snorc	secondary ossification center associated regulator of chondrocyte maturation
Chr13	94585944	94586994	-2.25826	0.00741805	Intron (uc011zcv.1/11881, intron 4 of 5)	44310	ENSMUSG00000042082	Arsb	arylsulfatase B
Chr1	75062171	75063170	2.73028	0.00742401	Intron (uc007bnn.2/75570, intron 3 of 5)	58630	ENSMUSG00000026162	Nhej1	non-homologous end joining factor 1
Chr5	94722285	94723284	2.01759	0.00745244	Distal Intergenic	12537	NA	NA	NA
Chr17	74150461	74151460	2.42973	0.0074687	Promoter (2-3kb)	-2721	ENSMUSG00000024065	Ehd3	EH-domain containing 3
Chr2	174895838	174896837	2.49223	0.00747477	Promoter (2-3kb)	-2574	ENSMUSG00000078905	Gm14393	predicted gene 14393
Chr2	37197599	37198598	2.02304	0.00749625	Distal Intergenic	10330	NA	NA	NA
ChrX	24717293	24718292	2.50026	0.00755456	Intron (uc009svg.1/382277, intron 4 of 8)	10289	ENSMUSG00000096620	Gm5169	predicted gene 5169
Chr15	94810675	94811674	2.1789	0.00755746	Intron (uc007xjn.1/320709, intron 5 of 7)	168075	ENSMUSG00000100603	LOC100043315	uncharacterized LOC100043315
Chr14	31576528	31577527	2.50374	0.0075743	Intron (uc007svr.2/54650, intron 1 of 20)	47727	ENSMUSG00000006527	Sfmbt1	Scm-like with four mbt domains 1
Chr1	112220127	112221126	2.27545	0.00758991	Distal Intergenic	224322	NA	NA	NA
Chr14	11069589	11070588	2.71131	0.00761001	Intron (uc007sfj.1/14198, intron 2 of 6)	215340	ENSMUSG00000060579	Fhit	fragile histidine triad gene
Chr5	119793280	119794831	-2.15116	0.00763025	Distal Intergenic	-325847	NA	NA	NA
Chr16	39953792	39954796	-2.67281	0.00764352	Distal Intergenic	-29688	NA	NA	NA
Chr11	11573018	11574271	-1.86879	0.00765046	Promoter (11-12kb)	-11945	ENSMUSG00000018654	Ikzf1	IKAROS family zinc finger 1
Chr3	6345409	6346408	2.57955	0.007681	Distal Intergenic	274035	NA	NA	NA
Chr3	61251681	61252896	-2.03306	0.00771039	Distal Intergenic	83252	NA	NA	NA
Chr6	60023964	60025686	-2.14942	0.00771782	Distal Intergenic	328015	NA	NA	NA
Chr3	102965013	102966023	-2.08266	0.00771836	Promoter (9-10kb)	-9611	ENSMUSG00000005687	Bcas2	breast carcinoma amplified sequence 2
Chr16	64443846	64445262	-2.24402	0.00772469	Distal Intergenic	33698	NA	NA	NA
Chr16	34114940	34115939	3.10243	0.00772613	Promoter (17-18kb)	-17764	ENSMUSG00000061751	Kalrn	kalirin, RhoGEF kinase
ChrX	56690328	56692321	-2.39728	0.00774619	Intron (uc009thv.1/14168, intron 2 of 3)	146425	ENSMUSG00000031137	Fgf13	fibroblast growth factor 13
Chr14	44062880	44063879	1.99878	0.0077475	Distal Intergenic	-36536	NA	NA	NA
Chr6	138776285	138777347	-2.04705	0.00774786	Distal Intergenic	-169320	NA	NA	NA
Chr6	26603544	26604591	-2.06337	0.00776089	Distal Intergenic	-844318	NA	NA	NA
Chr11	51079732	51080878	-2.36236	0.00776496	Promoter (<=1kb)	0	ENSMUSG00000020385	Clk4	CDC like kinase 4
Chr15	59432741	59435392	-1.99187	0.0077793	3' UTR	-44817	ENSMUSG00000032501	Trib1	tribbles pseudokinase 1
Chr4	146401328	146402327	1.83862	0.00779766	Intron (uc008vsm.1/70005, intron 2 of 4)	5398	NA	NA	NA
Chr4	57834689	57835731	-2.16327	0.00781684	Intron (uc008syi.1/11641, intron 2 of 4)	-22389	NA	NA	NA
Chr10	63261441	63262720	-2.59141	0.00782962	Intron (uc007fkh.2/216033, intron 5 of 17)	-21083	ENSMUSG00000060843	Ctnna3	catenin (cadherin associated protein), alpha 3
Chr13	7428872	7430477	-2	0.00783257	Distal Intergenic	-771678	NA	NA	NA
Chr5	146234584	146235583	2.58873	0.00784621	Promoter (3-4kb)	-3992	ENSMUSG00000038656	Cyp3a16	cytochrome P450, family 3, subfamily a, polypeptide 16
Chr2	89868311	89869511	-2.24924	0.00784941	Promoter (6-7kb)	-6090	ENSMUSG00000075069	Olfr1264	olfactory receptor 1264
Chr5	102646386	102647513	-2.04066	0.00787858	Intron (uc008yiu.1/231532, intron 1 of 2)	10169	ENSMUSG00000057315	Arhgap24	Rho GTPase activating protein 24
Chr5	139753851	139754850	2.39212	0.00789647	Intron (uc012efu.1/231821, intron 5 of 9)	24254	ENSMUSG00000056413	Adap1	ArfGAP with dual PH domains 1
Chr18	81900366	81902217	-1.76998	0.00792472	Distal Intergenic	673952	NA	NA	NA
Chr17	61923085	61924167	-2.13499	0.0079287	Distal Intergenic	1112181	NA	NA	NA
ChrX	156827908	156828949	-1.86126	0.00795353	Promoter (<=1kb)	0	ENSMUSG00000031298	Adgrg2	adhesion G protein-coupled receptor G2
Chr9	87928306	87929305	2.58597	0.0079701	Distal Intergenic	-293142	NA	NA	NA
Chr5	114546257	114547314	-2.20067	0.00801743	Promoter (3-4kb)	-3028	ENSMUSG00000029592	Usp30	ubiquitin specific peptidase 30
Chr6	29824712	29825926	-2.21671	0.0080622	Intron (uc009beh.2/74340, intron 4 of 16)	4423	ENSMUSG00000029772	Ahcyl2	S-adenosylhomocysteine hydrolase-like 2
Chr5	59702152	59703239	-2.30546	0.00806488	Distal Intergenic	-1590712	NA	NA	NA
Chr1	97727044	97728043	2.38843	0.008066	Distal Intergenic	-162873	NA	NA	NA
Chr4	136890827	136891826	2.35983	0.00808054	Promoter (<=1kb)	218	ENSMUSG00000006699	Cdc42	cell division cycle 42
Chr17	18294704	18295703	2.18913	0.00810123	Intron (uc009vaw.1/627111, intron 1 of 5)	5810	ENSMUSG00000091350	Vmn2r92	vomeronasal 2, receptor 92
Chr10	56831194	56832903	-1.99854	0.00810895	Distal Intergenic	-373288	NA	NA	NA
Chr4	58407090	58408089	2.38406	0.00811128	Distal Intergenic	45881	NA	NA	NA
Chr5	129037840	129039488	-1.77147	0.00812568	Distal Intergenic	51793	NA	NA	NA
Chr5	142933657	142935375	-1.75555	0.00813208	Promoter (4-5kb)	-4510	ENSMUSG00000039623	Ap5z1	adaptor-related protein complex 5, zeta 1 subunit
Chr1	185701603	185702602	2.58244	0.00816522	Distal Intergenic	155275	NA	NA	NA
Chr9	17307320	17308691	-2.39136	0.0081747	Distal Intergenic	-788020	NA	NA	NA
Chr1	7644275	7645274	2.18324	0.00818411	Distal Intergenic	494109	NA	NA	NA
Chr14	9118774	9119773	1.64677	0.00819942	Distal Intergenic	22517	NA	NA	NA
Chr14	26383202	26384408	-2.05492	0.00825378	Intron (uc007srm.1/328365, intron 3 of 10)	-21882	NA	4931406H21Rik	RIKEN cDNA 4931406H21 gene
Chr4	32964635	32965634	2.01324	0.00826165	Promoter (13-14kb)	-13486	ENSMUSG00000040183	Ankrd6	ankyrin repeat domain 6
Chr3	140883272	140884291	-2.18768	0.00828927	Promoter (7-8kb)	-7953	ENSMUSG00000047674	Pdha2	pyruvate dehydrogenase E1 alpha 2
ChrX	3546663	3547662	2.78145	0.00829329	Promoter (<=1kb)	0	ENSMUSG00000095770	Spin2-ps1	spindlin family, member 2, pseudogene 1
Chr12	4384410	4385474	-2.53132	0.00832741	Intron (uc011yju.1/17977, intron 1 of 22)	-29901	ENSMUSG00000020647	Ncoa1	nuclear receptor coactivator 1
Chr2	180756355	180758093	-1.8949	0.00833032	3' UTR	8414	ENSMUSG00000016356	Col20a1	collagen, type XX, alpha 1
Chr11	59791166	59792165	2.4279	0.00833082	Promoter (12-13kb)	-12722	ENSMUSG00000049892	Rasd1	RAS, dexamethasone-induced 1
Chr6	71420148	71421768	-2.07228	0.00833709	Distal Intergenic	-22120	NA	NA	NA
Chr7	55534761	55536052	-2.52027	0.00835654	Distal Intergenic	-80213	NA	NA	NA
Chr5	52873652	52875102	-2.86184	0.00835709	Distal Intergenic	82417	NA	NA	NA
Chr2	143699196	143700195	2.49386	0.00836493	Promoter (10-11kb)	-10287	ENSMUSG00000027420	Bfsp1	beaded filament structural protein 1, in lens-CP94
Chr7	92350170	92351170	-2.14832	0.00838226	Distal Intergenic	35044	NA	NA	NA
Chr15	48829967	48831150	-2.07162	0.00841516	Distal Intergenic	-206432	NA	NA	NA
Chr12	56142983	56144488	-1.82541	0.00843803	Downstream (2-3kb)	10226	ENSMUSG00000062198	2700097O09Rik	RIKEN cDNA 2700097O09 gene
Chr10	118684537	118685574	-1.65298	0.00845988	Promoter (7-8kb)	-7426	ENSMUSG00000020114	Cand1	cullin associated and neddylation disassociated 1
Chr2	27547284	27548283	2.44041	0.0084858	Intron (uc008ixs.1/20181, intron 1 of 9)	14563	ENSMUSG00000015846	Rxra	retinoid X receptor alpha
ChrX	31921440	31922439	1.9657	0.00849849	Distal Intergenic	-43971	NA	NA	NA
Chr9	23238721	23240143	-1.80408	0.00850381	Intron (uc009oow.1/73230, intron 13 of 14)	211201	ENSMUSG00000031963	Bmper	BMP-binding endothelial regulator
Chr8	26407877	26408876	2.13133	0.00851185	Distal Intergenic	-56504	NA	NA	NA
Chr3	115101323	115102322	2.11316	0.00851753	Distal Intergenic	315651	NA	NA	NA
Chr17	40603502	40605049	-2.27954	0.00853187	Distal Intergenic	-51922	NA	NA	NA
Chr16	78135544	78136598	-1.94139	0.00857169	Distal Intergenic	-165338	NA	NA	NA
Chr2	39781675	39782680	-2.98601	0.00859964	Distal Intergenic	688091	NA	NA	NA
Chr1	188721509	188722611	-1.86367	0.00863438	Distal Intergenic	-68684	NA	NA	NA
ChrX	4007643	4008642	1.91398	0.00865532	Promoter (12-13kb)	-12070	ENSMUSG00000094273	Btbd35f17	BTB domain containing 35, family member 17
Chr1	69656939	69657938	2.11859	0.00867	Intron (uc007bjd.2/22779, intron 3 of 7)	74596	ENSMUSG00000025997	Ikzf2	IKAROS family zinc finger 2
Chr1	189318494	189319493	2.93902	0.00867255	Distal Intergenic	-113415	NA	NA	NA
Chr9	46900908	46902862	-1.84145	0.00867934	Distal Intergenic	179222	NA	NA	NA
Chr1	5603555	5605034	-2.16561	0.00869044	Distal Intergenic	16956	NA	NA	NA
Chr6	35967134	35968133	2.36168	0.0086982	Distal Intergenic	369823	NA	NA	NA
Chr12	4332091	4333090	2.46547	0.00872451	Intron (uc007mxr.2/17977, intron 3 of 18)	11412	ENSMUSG00000020647	Ncoa1	nuclear receptor coactivator 1
Chr11	57590040	57591039	2.30142	0.00874895	Intron (uc007jab.1/171212, intron 7 of 11)	-24100	ENSMUSG00000020519	Sap30l	SAP30-like
Chr8	41819185	41820286	-1.8576	0.00875519	Promoter (17-18kb)	-17276	ENSMUSG00000071937	Adam25	a disintegrin and metallopeptidase domain 25 (testase 2)
Chr2	102721307	102722524	-2.49993	0.0087768	Intron (uc008lie.1/12505, intron 1 of 18)	19298	ENSMUSG00000005087	Cd44	CD44 antigen
Chr3	78550122	78551222	-2.11639	0.0087849	Distal Intergenic	397587	NA	NA	NA
Chr17	66237676	66238936	-1.81947	0.00878955	Promoter (2-3kb)	-2581	ENSMUSG00000024096	Ralbp1	ralA binding protein 1
Chr8	72031059	72032058	1.90051	0.0087901	Distal Intergenic	117016	NA	NA	NA
Chr3	155093948	155095944	-2.00438	0.00879689	Distal Intergenic	337550	NA	NA	NA
Chr10	125680975	125681974	3.92366	0.00881478	Distal Intergenic	277700	NA	NA	NA
Chr5	55177204	55178322	-2.31031	0.00881648	Distal Intergenic	680744	NA	NA	NA
Chr16	70291430	70293311	-2.13568	0.00891419	Distal Intergenic	-21021	NA	NA	NA
ChrX	158810020	158811778	-2.26937	0.00892156	Distal Intergenic	191670	NA	NA	NA
Chr10	49691016	49692806	-1.99711	0.00892767	Distal Intergenic	-182456	NA	NA	NA
Chr3	147203262	147205153	-2.03045	0.00893801	Distal Intergenic	596378	NA	NA	NA
Chr16	84731297	84732382	-2.1407	0.00893813	Intron (uc007zte.1/27393, intron 3 of 9)	3044	ENSMUSG00000022889	Mrpl39	mitochondrial ribosomal protein L39
Chr11	87232894	87234459	-1.85284	0.0089594	Promoter (6-7kb)	-6634	ENSMUSG00000010342	Tex14	testis expressed gene 14
Chr14	5971474	5972552	-2.00836	0.00898834	Intron (uc007scg.1/uc007scg.1, intron 2 of 6)	817820	ENSMUSG00000096197	4930555G01Rik	RIKEN cDNA 4930555G01 gene
Chr11	100912913	100914300	-2.0285	0.00900432	Intron (uc007lmu.1/11975, intron 19 of 21)	11778	ENSMUSG00000019302	Atp6v0a1	ATPase, H+ transporting, lysosomal V0 subunit A1
Chr6	87188133	87189588	-2.14141	0.00901704	Intron (uc009ctd.1/69538, intron 11 of 16)	68805	ENSMUSG00000033420	Antxr1	anthrax toxin receptor 1
Chr16	37595306	37596713	-1.93641	0.00902905	Intron (uc007zef.2/15233, intron 4 of 4)	15067	ENSMUSG00000022821	Hgd	homogentisate 1, 2-dioxygenase
Chr10	14895907	14897147	-2.34478	0.00904869	Distal Intergenic	415812	NA	NA	NA
Chr19	10176146	10177256	-2.19241	0.00906851	Promoter (<=1kb)	-153	ENSMUSG00000024665	Fads2	fatty acid desaturase 2
Chr10	91127652	91128707	-2.40515	0.00907187	Distal Intergenic	406223	NA	NA	NA
Chr2	135926504	135927527	-2.82106	0.00908202	Exon (uc008moh.1/241656, exon 5 of 10)	42841	ENSMUSG00000027270	Lamp5	lysosomal-associated membrane protein family, member 5
Chr5	53686224	53687397	-1.77564	0.00909039	Distal Intergenic	27879	NA	NA	NA
Chr1	79097744	79098912	-2.06904	0.00910759	Distal Intergenic	284220	NA	NA	NA
Chr6	60561277	60562286	-2.06824	0.00910819	Distal Intergenic	-207576	NA	NA	NA
Chr3	89590144	89591143	2.38082	0.00911146	Distal Intergenic	12613	NA	NA	NA
Chr2	111653410	111654924	-2.05635	0.0091177	Promoter (<=1kb)	0	ENSMUSG00000093804	Olfr1303	olfactory receptor 1303
Chr2	132074955	132075954	2.40715	0.00913561	Promoter (1-2kb)	-1431	ENSMUSG00000027341	Tmem230	transmembrane protein 230
Chr8	84189379	84190766	-2.09542	0.00913981	Intron (uc009mje.1/234515, intron 2 of 24)	-48334	ENSMUSG00000037940	Inpp4b	inositol polyphosphate-4-phosphatase, type II
Chr18	29408141	29410034	-1.7915	0.00914225	Distal Intergenic	-1022516	NA	NA	NA
Chr9	10150376	10152008	-2.03057	0.00914663	Intron (uc009odr.2/244682, intron 3 of 20)	752767	ENSMUSG00000039488	Cntn5	contactin 5
Chr2	158345186	158346207	-2.37805	0.00915304	Intron (uc012cih.1/545481, intron 1 of 14)	6654	ENSMUSG00000074625	Arhgap40	Rho GTPase activating protein 40
ChrX	86069276	86070275	2.86971	0.00915353	Distal Intergenic	-64384	NA	NA	NA
Chr16	3426252	3427251	2.32755	0.00916157	Distal Intergenic	-165147	NA	NA	NA
Chr11	37154164	37155816	-1.77781	0.00923279	Distal Intergenic	-396419	NA	NA	NA
Chr10	110909352	110910351	2.34485	0.0092372	Promoter (<=1kb)	0	ENSMUSG00000058799	Nap1l1	nucleosome assembly protein 1-like 1
Chr4	147888334	147889471	3.30907	0.00924685	Exon-(uc008vur.2/56717,-exon-30-of-58)	-13763	ENSMUSG00000028989	Angptl7	angiopoietin-like 7
Chr8	42252385	42253384	2.47425	0.00926724	Distal Intergenic	-33305	NA	NA	NA
Chr12	63409557	63410556	1.91968	0.00936385	Distal Intergenic	783938	NA	NA	NA
Chr18	36061189	36062188	3.04931	0.0093728	Distal Intergenic	46844	NA	NA	NA
ChrX	124932228	124933420	-1.85385	0.00939248	Distal Intergenic	1003403	NA	NA	NA
Chr11	110645225	110646224	3.13928	0.00942062	Distal Intergenic	-183123	NA	NA	NA
Chr6	147048122	147051173	-1.75812	0.00943821	Exon (uc009esu.1/232539, exon 2 of 3)	8525	ENSMUSG00000040102	Klhl42	kelch-like 42
Chr11	110290486	110291485	3.11206	0.00945627	Intron (uc007mdr.1/26399, intron 1 of 11)	30050	ENSMUSG00000020623	Map2k6	mitogen-activated protein kinase kinase 6
Chr7	96100717	96101816	-1.90065	0.00947325	Distal Intergenic	385481	NA	NA	NA
Chr18	35410763	35411799	-1.90859	0.00947758	Exon (uc008ely.1/12385, exon 16 of 18)	-36085	ENSMUSG00000071862	Lrrtm2	leucine rich repeat transmembrane neuronal 2
Chr12	96380478	96382311	-2.05435	0.00953325	Distal Intergenic	-548125	NA	NA	NA
ChrX	102138983	102140083	-2.22538	0.00957176	Distal Intergenic	-86377	NA	NA	NA
Chr13	91827279	91828786	-2.05956	0.00961082	Exon (uc007rjv.2/66970, exon 13 of 17)	-52340	ENSMUSG00000021620	Acot12	acyl-CoA thioesterase 12
Chr13	23670171	23671170	1.94029	0.00961165	Promoter (2-3kb)	-2301	ENSMUSG00000061482	H4c4	H4 clustered histone 4
Chr1	12030807	12031806	2.07087	0.00963369	Distal Intergenic	444575	NA	NA	NA
Chr4	66572271	66573270	2.43592	0.00964326	Distal Intergenic	83426	NA	NA	NA
Chr17	87721885	87722934	-1.93741	0.00966305	Exon (uc008duu.1/225049, exon 7 of 19)	39659	ENSMUSG00000036918	Ttc7	tetratricopeptide repeat domain 7
Chr1	47685555	47686554	2.04927	0.00970953	Distal Intergenic	-775201	NA	NA	NA
Chr4	35179783	35181393	-1.7296	0.00972208	Promoter (6-7kb)	-6411	ENSMUSG00000028300	C9orf72	C9orf72, member of C9orf72-SMCR8 complex
Chr3	3021231	3023719	1.62092	0.00974837	Distal Intergenic	-484311	NA	NA	NA
Chr13	105012349	105013360	-1.93508	0.00976289	Exon (uc007rsz.2/238831, exon 3 of 11)	5564	ENSMUSG00000021713	Ppwd1	peptidylprolyl isomerase domain and WD repeat containing 1
Chr7	114637496	114638495	2.5869	0.0097633	Intron (uc009jba.1/60510, intron 3 of 6)	-72452	ENSMUSG00000051041	Olfml1	olfactomedin-like 1
Chr16	40368482	40369481	2.47653	0.00985176	Intron (uc007zfq.1/uc007zfq.1, intron 2 of 2)	383998	ENSMUSG00000061080	Lsamp	limbic system-associated membrane protein
Chr4	134393925	134395428	-1.8487	0.00987563	Intron (uc008vfq.1/66146, intron 1 of 10)	13832	ENSMUSG00000028826	Maco1	macoilin 1
Chr8	24529000	24530923	-1.86993	0.00988897	Intron (uc009lev.2/20377, intron 2 of 2)	7026	ENSMUSG00000031548	Sfrp1	secreted frizzled-related protein 1
Chr3	104232586	104233585	2.59621	0.00990117	Distal Intergenic	33183	NA	NA	NA
Chr7	29333712	29334720	-2.05205	0.00992183	Promoter (1-2kb)	-1439	ENSMUSG00000047586	Nccrp1	non-specific cytotoxic cell receptor protein 1 homolog (zebrafish)
Chr11	109763087	109764871	-2.03142	0.00994205	Distal Intergenic	-73727	NA	NA	NA
Chr7	28806897	28807896	2.93095	0.00997126	Distal Intergenic	19844	NA	NA	NA
Chr4	75305559	75306558	2.39372	0.00999882	Distal Intergenic	-381369	NA	NA	NA
Chr1	88418355	88419354	2.22956	0.010005	Promoter (3-4kb)	-3957	ENSMUSG00000026238	Ptma	prothymosin alpha
Chr19	50962238	50963414	-2.04118	0.0100334	Distal Intergenic	-209136	NA	NA	NA
Chr18	69099903	69101085	-1.93134	0.0100356	Distal Intergenic	-403061	NA	NA	NA
Chr2	55297287	55298286	2.43399	0.0101267	Intron (uc008jru.1/16519, intron 1 of 2)	8095	ENSMUSG00000026824	Kcnj3	potassium inwardly-rectifying channel, subfamily J, member 3
Chr10	60148945	60150849	-1.58573	0.0101503	5' UTR	8389	ENSMUSG00000012819	Cdh23	cadherin 23 (otocadherin)
Chr5	115554426	115556329	-2.5221	0.0101506	Distal Intergenic	12993	NA	NA	NA
Chr5	97017668	97019001	-2.14257	0.0101752	Intron (uc008yfk.1/231470, intron 15 of 73)	-203403	ENSMUSG00000029484	Anxa3	annexin A3
Chr4	10122636	10123635	2.71945	0.0102034	Distal Intergenic	-278092	NA	NA	NA
Chr10	59965644	59967207	-1.76628	0.0102037	Intron (uc007fev.1/22295, intron 10 of 68)	92348	ENSMUSG00000012819	Cdh23	cadherin 23 (otocadherin)
Chr7	36004360	36006063	-1.7605	0.0102321	Promoter (3-4kb)	-3996	ENSMUSG00000001802	Lrp3	low density lipoprotein receptor-related protein 3
Chr14	44179474	44180473	2.52285	0.0102379	3' UTR	5205	ENSMUSG00000095528	Gm10375	predicted gene 10375
Chr8	113867231	113868230	2.60171	0.0102772	Promoter (5-6kb)	-5428	ENSMUSG00000012519	Mlkl	mixed lineage kinase domain-like
Chr4	66425939	66427674	-2.03442	0.0102804	Distal Intergenic	-61171	NA	NA	NA
Chr17	68291654	68292653	2.87567	0.0103118	Intron (uc008dki.2/268970, intron 1 of 17)	7627	ENSMUSG00000024043	Arhgap28	Rho GTPase activating protein 28
Chr3	56524516	56525515	2.36444	0.0103377	Distal Intergenic	-536893	NA	NA	NA
Chr10	65729033	65730253	-2.21279	0.0103917	Distal Intergenic	-828620	NA	NA	NA
Chr1	135920224	135922533	-1.8711	0.0103988	Promoter (11-12kb)	-11559	ENSMUSG00000041559	Fmod	fibromodulin
Chr1	76799929	76800928	2.40778	0.0104184	Distal Intergenic	710735	NA	NA	NA
Chr5	26431741	26432740	2.31173	0.0104299	Promoter (<=1kb)	0	ENSMUSG00000051940	5031410I06Rik	RIKEN cDNA 5031410I06 gene
Chr7	125684021	125685020	2.50463	0.0104345	Promoter (7-8kb)	-7194	ENSMUSG00000030652	Coq7	demethyl-Q 7
Chr9	52899102	52900101	2.27507	0.0104421	Distal Intergenic	156116	NA	NA	NA
Chr10	122650376	122651727	-2.1278	0.0104508	Promoter (16-17kb)	-16397	ENSMUSG00000020124	Usp15	ubiquitin specific peptidase 15
Chr7	23391144	23392143	2.39366	0.0104872	Intron (uc012fef.1/100043595, intron 1 of 2)	6141	NA	Gm4541	NLR family, pyrin domain containing 4E pseudogene
Chr7	84783934	84785088	-2.14515	0.0105129	Distal Intergenic	737620	NA	NA	NA
Chr3	73017149	73018148	2.12031	0.0105229	Intron (uc008pmu.1/uc008pmu.1, intron 1 of 4)	-155424	ENSMUSG00000048304	Slitrk3	SLIT and NTRK-like family, member 3
Chr1	116682823	116684197	-2.16708	0.0105272	Distal Intergenic	-897517	NA	NA	NA
Chr11	96331618	96333939	-1.68738	0.0105647	Intron (uc007lca.2/78473, intron 1 of 2)	5713	ENSMUSG00000057058	Skap1	src family associated phosphoprotein 1
Chr8	80799699	80800698	2.16536	0.0105954	Exon (uc009mhx.1/73301, exon 8 of 14)	62458	ENSMUSG00000037101	Ttc29	tetratricopeptide repeat domain 29
Chr1	112069304	112070303	1.97795	0.0106093	Distal Intergenic	73499	NA	NA	NA
Chr7	93358521	93359711	-2.21793	0.0107421	Distal Intergenic	35000	NA	NA	NA
Chr11	65259827	65261267	-2.30849	0.0107435	Distal Intergenic	-176336	NA	NA	NA
Chr14	59084095	59085094	3.02866	0.0107435	Distal Intergenic	390143	NA	NA	NA
Chr9	69440594	69441593	2.11193	0.0107439	Distal Intergenic	114322	NA	NA	NA
Chr9	119983935	119985907	-1.75611	0.0107677	Promoter (6-7kb)	-6535	ENSMUSG00000052336	Cx3cr1	chemokine (C-X3-C motif) receptor 1
Chr9	89538323	89539322	3.04978	0.010768	Distal Intergenic	-20499	NA	NA	NA
Chr5	130807497	130808594	-1.88543	0.0107682	Intron (uc008zul.2/100929, intron 14 of 15)	-36734	ENSMUSG00000060371	Caln1	calneuron 1
Chr16	18255313	18256312	3.03884	0.0108013	3' UTR	5734	ENSMUSG00000022721	Trmt2a	TRM2 tRNA methyltransferase 2A
Chr7	63945234	63946233	2.11356	0.0108398	Distal Intergenic	450093	NA	NA	NA
Chr5	31316237	31317259	-2.55501	0.010861	Distal Intergenic	33193	NA	NA	NA
Chr4	15772337	15773560	-2.17246	0.0108747	Distal Intergenic	-34851	NA	NA	NA
Chr6	113894253	113895462	-2.32782	0.0108782	Promoter (9-10kb)	-9578	ENSMUSG00000030302	Atp2b2	ATPase, Ca++ transporting, plasma membrane 2
ChrX	131978623	131979622	2.09677	0.0109092	Distal Intergenic	10249	NA	NA	NA
Chr3	125816122	125818114	-2.11387	0.0109322	Distal Intergenic	-156551	NA	NA	NA
Chr9	88844717	88845716	2.06911	0.0109548	Promoter (6-7kb)	-6042	ENSMUSG00000102037	Bcl2a1a	B cell leukemia/lymphoma 2 related protein A1a
Chr16	81359854	81361348	-1.84022	0.0109642	Intron (uc007zta.2/17968, intron 1 of 15)	158912	ENSMUSG00000022762	Ncam2	neural cell adhesion molecule 2
Chr5	33133578	33135085	-1.80112	0.0109805	Promoter (5-6kb)	-5303	ENSMUSG00000023452	Pisd	phosphatidylserine decarboxylase
Chr9	40429029	40430203	-1.82234	0.0109989	Distal Intergenic	-63844	NA	NA	NA
Chr15	40264572	40266496	-1.78025	0.0109995	Distal Intergenic	-220092	NA	NA	NA
Chr5	58527560	58529214	-2.12206	0.0110285	Distal Intergenic	-416120	NA	NA	NA
Chr13	101249300	101250580	-2.74369	0.0110688	Exon (uc007rqt.1/23894, exon 11 of 18)	11749	ENSMUSG00000021639	Gtf2h2	general transcription factor II H, polypeptide 2
Chr4	46439099	46440451	-1.89425	0.01107	Promoter (12-13kb)	-12718	ENSMUSG00000028332	Hemgn	hemogen
Chr5	11477105	11478104	2.17726	0.0110768	Distal Intergenic	-116852	NA	NA	NA
Chr12	65640714	65641755	-2.18752	0.0110792	Distal Intergenic	-64829	NA	NA	NA
Chr5	142936475	142937801	-1.91003	0.0111215	Promoter (2-3kb)	-2084	ENSMUSG00000039623	Ap5z1	adaptor-related protein complex 5, zeta 1 subunit
Chr1	43499858	43501608	-1.94633	0.0111217	Promoter (<=1kb)	-988	ENSMUSG00000066877	Nck2	non-catalytic region of tyrosine kinase adaptor protein 2
Chr5	6728955	6730483	-1.97139	0.0111291	Distal Intergenic	-573681	NA	NA	NA
Chr6	69625360	69626438	-1.93354	0.0111525	Intron (uc012enb.1/uc012enb.1, intron 37 of 81)	-347849	ENSMUSG00000106222	Rprl1	ribonuclease P RNA-like 1
Chr16	14693788	14694787	2.17968	0.0111565	Promoter (11-12kb)	-11165	ENSMUSG00000022676	Snai2	snail family zinc finger 2
Chr16	13930051	13931050	2.17845	0.0111952	Promoter (<=1kb)	0	ENSMUSG00000022679	Mpv17l	Mpv17 transgene, kidney disease mutant-like
Chr2	50411577	50412576	2.25984	0.0112101	Distal Intergenic	-259380	NA	NA	NA
Chr11	25022884	25024350	-2.1257	0.0112462	Distal Intergenic	-392162	NA	NA	NA
Chr6	105917489	105918907	-1.84827	0.0112561	Intron (uc009dcr.2/269784, intron 3 of 19)	42726	ENSMUSG00000064293	Cntn4	contactin 4
Chr2	177098968	177099967	1.9084	0.0112561	Distal Intergenic	-149480	NA	NA	NA
Chr12	109702216	109703655	-2.05867	0.0112644	Promoter (<=1kb)	479	ENSMUSG00000058070	Eml1	echinoderm microtubule associated protein like 1
Chr10	129739894	129740908	-2.09919	0.0112765	Promoter (18-19kb)	-19000	ENSMUSG00000034833	Tespa1	thymocyte expressed, positive selection associated 1
ChrX	13634223	13635258	-2.47139	0.0112825	Distal Intergenic	-153016	NA	NA	NA
Chr3	53845801	53847969	-1.79743	0.0112866	Distal Intergenic	-112057	NA	NA	NA
Chr7	15040612	15041611	2.41375	0.011337	Promoter (8-9kb)	-8676	ENSMUSG00000030378	Sult2a8	sulfotransferase family 2A, dehydroepiandrosterone (DHEA)-preferring, member 8
Chr2	173832417	173833498	-1.92965	0.0113634	Distal Intergenic	-68324	NA	NA	NA
Chr19	45220051	45221050	3.13534	0.0113706	Promoter (4-5kb)	-4155	ENSMUSG00000025215	Tlx1	T cell leukemia, homeobox 1
Chr10	62885995	62887102	-1.81825	0.011394	Promoter (5-6kb)	-5744	ENSMUSG00000060843	Ctnna3	catenin (cadherin associated protein), alpha 3
Chr2	78017282	78018474	-1.86769	0.0114168	Intron (uc008kgk.1/uc008kgk.1, intron 2 of 6)	-59230	ENSMUSG00000054510	Gm14461	predicted gene 14461
Chr9	98672634	98673959	-2.11997	0.011423	Distal Intergenic	-69047	NA	NA	NA
Chr3	104263303	104264302	2.35842	0.0114655	Promoter (2-3kb)	2466	ENSMUSG00000032913	Lrig2	leucine-rich repeats and immunoglobulin-like domains 2
Chr16	70938625	70939717	-3.90399	0.0114665	Distal Intergenic	624293	NA	NA	NA
Chr2	59226361	59227569	-1.78606	0.0115016	Distal Intergenic	80214	NA	NA	NA
Chr18	55325980	55326979	2.48299	0.0115177	Distal Intergenic	-173735	NA	NA	NA
Chr14	112788687	112789831	-1.86024	0.0115301	Distal Intergenic	714350	NA	NA	NA
Chr14	81956194	81957664	1.95721	0.0115566	Distal Intergenic	1556085	NA	NA	NA
Chr1	152679415	152681298	-2.04044	0.0115584	Intron (uc007cyj.1/545370, intron 4 of 106)	159267	ENSMUSG00000066842	Hmcn1	hemicentin 1
ChrX	11984928	11985927	2.15884	0.0116012	Distal Intergenic	-178958	NA	NA	NA
ChrX	88121930	88123003	-2.47281	0.0116069	Promoter (14-15kb)	-14478	ENSMUSG00000091497	Gm44	predicted gene 44
Chr17	85534930	85536269	-1.74441	0.0116586	Intron (uc008dtt.1/73582, intron 3 of 10)	43507	ENSMUSG00000071037	Camkmt	calmodulin-lysine N-methyltransferase
Chr5	52696614	52698571	-2.16589	0.0117412	Distal Intergenic	-56472	NA	NA	NA
Chr4	43620479	43622133	-1.80709	0.0117579	Distal Intergenic	-22674	NA	NA	NA
Chr10	3153580	3154579	2.27448	0.0117646	Intron (uc007efb.1/215748, intron 1 of 12)	19276	ENSMUSG00000015202	Cnksr3	Cnksr family member 3
Chr18	49184596	49185762	-2.35758	0.0117762	Distal Intergenic	-497181	NA	NA	NA
ChrX	32201139	32202138	2.24696	0.0117847	Distal Intergenic	-323670	NA	NA	NA
ChrX	72953744	72954988	-1.8033	0.0117847	Distal Intergenic	45948	NA	NA	NA
Chr1	57515891	57516890	3.12812	0.0117975	Distal Intergenic	-52373	NA	NA	NA
ChrX	98908845	98910032	-1.8965	0.0118365	Distal Intergenic	19454	NA	NA	NA
Chr4	13232717	13234576	-2.23346	0.0118707	Distal Intergenic	398733	NA	NA	NA
ChrX	71680494	71681631	-1.77352	0.0119207	Intron (uc009tpe.2/16151, intron 3 of 9)	5474	ENSMUSG00000004221	Ikbkg	inhibitor of kappaB kinase gamma
ChrX	138117155	138118805	-2.06185	0.0119223	Exon (uc009uln.2/12830, exon 49 of 52)	40955	ENSMUSG00000054667	Irs4	insulin receptor substrate 4
Chr14	102133602	102134601	1.80703	0.0119416	Intron (uc007uvx.2/380928, intron 1 of 30)	4457	ENSMUSG00000033060	Lmo7	LIM domain only 7
Chr5	94943058	94944057	1.80773	0.0119576	Distal Intergenic	136693	NA	NA	NA
Chr2	43588639	43589775	-2.13113	0.0119595	Promoter (14-15kb)	-14569	ENSMUSG00000049744	Arhgap15	Rho GTPase activating protein 15
Chr8	128474716	128475715	3.15897	0.011974	Distal Intergenic	40366	NA	NA	NA
Chr2	167302292	167303291	2.74594	0.0119896	3' UTR	8667	ENSMUSG00000047030	Spata2	spermatogenesis associated 2
Chr10	36984917	36986026	-2.05603	0.0120028	Distal Intergenic	-126185	NA	NA	NA
Chr2	59809280	59810660	-1.94351	0.012033	Intron (uc008jtr.1/407823, intron 6 of 35)	-88617	ENSMUSG00000026988	Wdsub1	WD repeat, SAM and U-box domain containing 1
Chr10	122556060	122557992	-1.76004	0.0120393	Exon (uc007hgm.1/14479, exon 8 of 9)	6949	ENSMUSG00000020124	Usp15	ubiquitin specific peptidase 15
Chr17	93366425	93367424	2.72113	0.012091	Distal Intergenic	-230937	NA	NA	NA
Chr1	173449546	173450738	-1.84969	0.0121131	Intron (uc007doq.1/16429, intron 7 of 7)	14686	ENSMUSG00000038209	Itln1	intelectin 1 (galactofuranose binding)
Chr13	86938319	86939318	2.69049	0.0121439	Distal Intergenic	-751919	NA	NA	NA
Chr1	21622394	21623455	-1.78771	0.0121454	Intron (uc007alq.2/226922, intron 1 of 13)	-144980	ENSMUSG00000028033	Kcnq5	potassium voltage-gated channel, subfamily Q, member 5
Chr15	91133787	91135603	-2.0365	0.0122123	Intron (uc007xhy.2/239606, intron 7 of 9)	-111549	ENSMUSG00000055782	Abcd2	ATP-binding cassette, sub-family D (ALD), member 2
Chr7	68791293	68792300	-2.28086	0.0122439	Distal Intergenic	35778	NA	NA	NA
Chr6	8154228	8155644	-1.91895	0.0122813	Promoter (3-4kb)	-3583	ENSMUSG00000042447	Mios	meiosis regulator for oocyte development
Chr5	132833759	132834809	-1.96843	0.0122844	Intron (uc008zuv.1/319974, intron 1 of 19)	183404	ENSMUSG00000029673	Auts2	autism susceptibility candidate 2
Chr1	52213995	52215851	-2.04816	0.0122979	Intron (uc007aya.1/20846, intron 24 of 24)	13073	ENSMUSG00000026104	Stat1	signal transducer and activator of transcription 1
Chr8	128512070	128513069	1.77134	0.0123533	Promoter (5-6kb)	-5933	ENSMUSG00000033998	Kcnk1	potassium channel, subfamily K, member 1
Chr2	169642775	169643774	2.12356	0.012366	Intron (uc008obo.2/228911, intron 1 of 1)	-65252	ENSMUSG00000047907	Tshz2	teashirt zinc finger family member 2
Chr7	121741173	121742299	-2.30673	0.0123824	Distal Intergenic	-34687	NA	NA	NA
Chr5	23202944	23203943	2.52762	0.0123947	Promoter (12-13kb)	-12509	ENSMUSG00000062604	Srpk2	serine/arginine-rich protein specific kinase 2
Chr1	88330366	88332091	-1.72658	0.0124057	Distal Intergenic	7462	NA	NA	NA
Chr4	78043599	78044739	-1.96303	0.0124263	Distal Intergenic	-185800	NA	NA	NA
Chr15	29918576	29920120	1.73484	0.0124666	Distal Intergenic	-182228	NA	NA	NA
Chr7	31402271	31403366	-1.79308	0.0124852	Promoter (4-5kb)	-4526	ENSMUSG00000006313	Upk1a	uroplakin 1A
Chr13	71805548	71806939	-2.1834	0.0125417	Distal Intergenic	294232	NA	NA	NA
Chr10	117588375	117590268	-1.86004	0.0125458	Exon (uc007hdt.2/17245, exon 6 of 14)	9532	ENSMUSG00000020212	Mdm1	transformed mouse 3T3 cell double minute 1
Chr10	129942332	129943331	1.96279	0.0125756	Promoter (7-8kb)	-7897	ENSMUSG00000091511	Vmn2r87	vomeronasal 2, receptor 87
Chr1	52436260	52437527	-1.94561	0.0125968	Distal Intergenic	119765	NA	NA	NA
Chr4	147174874	147175873	1.81329	0.0125996	Intron (uc012dpf.1/100041677, intron 2 of 5)	8022	ENSMUSG00000078495	Zfp984	zinc finger protein 984
Chr11	6827765	6829120	-1.73439	0.0126553	Distal Intergenic	-134372	NA	NA	NA
Chr4	146822236	146823235	2.04972	0.0126601	Intron (uc008vsu.1/195531, intron 1 of 2)	86819	ENSMUSG00000078496	Zfp982	zinc finger protein 982
Chr9	116229628	116230627	2.61474	0.0127209	Distal Intergenic	-145147	NA	NA	NA
Chr14	105104080	105105079	1.98641	0.0127288	Intron (uc007uxf.2/320249, intron 1 of 4)	65716	ENSMUSG00000115432	D130009I18Rik	RIKEN cDNA D130009I18 gene
Chr1	166841185	166842184	2.32827	0.0127347	Distal Intergenic	23457	NA	NA	NA
Chr14	12831303	12832302	2.35458	0.0127395	Intron (uc007sfm.2/19270, intron 4 of 29)	-190155	ENSMUSG00000021745	Ptprg	protein tyrosine phosphatase, receptor type, G
Chr1	28240507	28241647	-2.38756	0.0127564	Distal Intergenic	595450	NA	NA	NA
Chr3	90670508	90671507	2.68854	0.0127831	Distal Intergenic	139680	NA	NA	NA
Chr1	20697711	20699601	-1.83054	0.012798	Distal Intergenic	-21385	NA	NA	NA
Chr9	28598402	28600249	-2.03102	0.0128554	Intron (uc009oqr.1/330908, intron 3 of 7)	387668	ENSMUSG00000062257	Opcml	opioid binding protein/cell adhesion molecule-like
Chr7	54252224	54253223	2.47939	0.0129013	Exon (uc009gzx.2/101685, exon 3 of 6)	10034	ENSMUSG00000056509	Gm9999	predicted gene 9999
Chr4	3024295	3026176	-1.82602	0.0129273	Distal Intergenic	-73054	NA	NA	NA
Chr2	46403350	46404565	-1.96632	0.0129344	Distal Intergenic	-1430435	NA	NA	NA
Chr6	16787859	16788858	2.44533	0.0129636	Intron (uc009aze.2/21426, intron 5 of 6)	59583	ENSMUSG00000029553	Tfec	transcription factor EC
Chr5	113829381	113830556	-1.82257	0.0129669	Distal Intergenic	43067	NA	NA	NA
Chr17	58586675	58587674	1.91292	0.0129688	Distal Intergenic	435882	NA	NA	NA
Chr2	46199474	46200473	2.84799	0.0130023	Distal Intergenic	-1226559	NA	NA	NA
Chr14	54166618	54167617	2.59625	0.0130557	Intron (uc011zkv.1/uc011zkv.1, intron 1 of 1)	705987	ENSMUSG00000022174	Dad1	defender against cell death 1
ChrX	121241133	121242132	1.60847	0.0130674	Promoter (1-2kb)	1446	ENSMUSG00000072049	Vmn2r121	vomeronasal 2, receptor 121
Chr4	4808303	4809558	-1.86849	0.0130764	Distal Intergenic	-87850	NA	NA	NA
Chr10	110559130	110560239	-2.11005	0.0131028	Distal Intergenic	-41619	NA	NA	NA
Chr9	90717722	90719078	-1.85848	0.0131172	Distal Intergenic	541534	NA	NA	NA
Chr8	18852246	18853245	2.26821	0.0131356	Intron (uc009kzv.1/52123, intron 1 of 7)	5967	ENSMUSG00000031467	Agpat5	1-acylglycerol-3-phosphate O-acyltransferase 5 (lysophosphatidic acid acyltransferase, epsilon)
Chr3	87794577	87796231	-1.78377	0.0131466	Exon (uc008pto.2/12032, exon 9 of 14)	8047	ENSMUSG00000004892	Bcan	brevican
Chr16	52967905	52968904	2.88033	0.0131482	Distal Intergenic	-514795	NA	NA	NA
ChrX	118126465	118127838	-1.77979	0.0131672	Distal Intergenic	375261	NA	NA	NA
Chr4	125235195	125236194	2.44497	0.0132415	Intron (uc008usa.2/14807, intron 1 of 15)	53906	NA	Ftl2-ps	ferritin light polypeptide 2, pseudogene
Chr2	88266017	88267016	2.52235	0.0132862	Promoter (1-2kb)	-1837	ENSMUSG00000075125	Olfr1181	olfactory receptor 1181
Chr15	38362886	38364466	-1.68178	0.0133133	Distal Intergenic	84555	NA	NA	NA
Chr6	145757821	145759801	2.81707	0.0133291	Promoter-(<=1kb)	918	ENSMUSG00000030259	Rassf8	Ras association (RalGDS/AF-6) domain family (N terminal) member 8
Chr1	121734494	121735493	2.49564	0.0133606	Promoter (<=1kb)	-846	ENSMUSG00000026384	Ptpn4	protein tyrosine phosphatase, non-receptor type 4
Chr12	48198863	48200399	-2.04722	0.0133665	Distal Intergenic	-279101	NA	NA	NA
Chr13	112895841	112896884	-1.88221	0.0133762	Distal Intergenic	-181775	NA	NA	NA
Chr14	51645171	51646947	-1.83449	0.0133857	Distal Intergenic	14595	NA	NA	NA
Chr10	33599134	33600575	-1.75398	0.013439	3' UTR	21606	ENSMUSG00000069668	Sult3a1	sulfotransferase family 3A, member 1
Chr5	53960947	53962728	-1.86236	0.0134793	Intron (uc008xlh.1/19664, intron 1 of 10)	13929	ENSMUSG00000039191	Rbpj	recombination signal binding protein for immunoglobulin kappa J region
Chr7	142850502	142851782	-1.93418	0.0135053	Promoter (6-7kb)	-6505	ENSMUSG00000097471	5830432E09Rik	RIKEN cDNA 5830432E09 gene
Chr11	75697321	75698810	-1.65066	0.0135409	Intron (uc007kew.1/380714, intron 3 of 7)	25751	ENSMUSG00000020847	Rph3al	rabphilin 3A-like (without C2 domains)
Chr5	10068154	10069651	-2.0444	0.0135433	Distal Intergenic	-342802	NA	NA	NA
Chr13	119483355	119484622	-2.08915	0.0135581	Promoter (18-19kb)	-18884	ENSMUSG00000021732	Fgf10	fibroblast growth factor 10
Chr2	4178722	4179721	2.79187	0.0135586	Intron (uc008ieo.2/209630, intron 1 of 22)	-42210	ENSMUSG00000026657	Frmd4a	FERM domain containing 4A
Chr1	15222033	15223200	-1.79528	0.0136029	Distal Intergenic	-79333	NA	NA	NA
Chr4	62466151	62467651	-1.84556	0.0136143	Distal Intergenic	104422	NA	NA	NA
Chr14	4165926	4167101	-1.81138	0.0136275	Intron (uc007sbj.1/545007, intron 5 of 5)	38949	ENSMUSG00000096775	Gm5796	predicted gene 5796
Chr6	96947720	96950358	-1.69823	0.0136481	Intron (uc009dah.1/320701, intron 3 of 5)	60047	ENSMUSG00000046500	Tafa4	TAFA chemokine like family member 4
Chr12	68999375	69001184	-2.04366	0.0136806	Distal Intergenic	-229117	NA	NA	NA
Chr1	3078180	3079179	2.43552	0.0136932	Distal Intergenic	126534	NA	NA	NA
Chr13	34454715	34455714	2.30763	0.0137052	Promoter (17-18kb)	-17664	ENSMUSG00000038267	Slc22a23	solute carrier family 22, member 23
Chr4	29171370	29172427	-2.03774	0.0137163	Distal Intergenic	431075	NA	NA	NA
Chr5	68567969	68569589	-2.2585	0.0137292	Distal Intergenic	144895	NA	NA	NA
ChrX	143740534	143742228	1.68222	0.0137349	Distal Intergenic	90295	NA	NA	NA
Chr8	31091290	31092289	2.44725	0.0137693	Distal Intergenic	-761182	NA	NA	NA
Chr1	113712423	113713461	-2.52648	0.0137982	Distal Intergenic	48034	NA	NA	NA
Chr14	8379248	8381045	1.65553	0.0138096	Intron (uc007sdw.2/100042149, intron 4 of 5)	46102	ENSMUSG00000072726	Gm5797	predicted gene 5797
Chr2	64819405	64820404	3.15304	0.0138212	Promoter (5-6kb)	-5602	ENSMUSG00000026888	Grb14	growth factor receptor bound protein 14
Chr4	12246828	12247917	1.87072	0.0138676	Distal Intergenic	-147666	NA	NA	NA
Chr18	15010441	15011440	2.07682	0.0138698	Intron (uc008edl.2/72504, intron 13 of 14)	68687	ENSMUSG00000054321	Taf4b	TATA-box binding protein associated factor 4b
Chr17	66494114	66495113	2.52285	0.0138996	Intron (uc008dha.1/320209, intron 17 of 25)	21254	ENSMUSG00000035842	Ddx11	DEAD/H (Asp-Glu-Ala-Asp/His) box helicase 11
Chr1	174070351	174071350	2.43218	0.0139159	Promoter (6-7kb)	-6796	ENSMUSG00000026554	Dcaf8	DDB1 and CUL4 associated factor 8
Chr10	112971313	112973019	-2.08025	0.0139318	Distal Intergenic	-605231	NA	NA	NA
Chr10	86726030	86727196	-1.78857	0.0139365	Distal Intergenic	57306	NA	NA	NA
Chr17	41357705	41358855	-1.79403	0.0139582	Distal Intergenic	286071	NA	NA	NA
Chr5	115278082	115279304	-1.91347	0.0140137	Promoter (4-5kb)	-4605	ENSMUSG00000072694	2610524H06Rik	RIKEN cDNA 2610524H06 gene
Chr6	50557405	50558404	2.98431	0.0140477	Promoter (10-11kb)	-10816	ENSMUSG00000029828	4921507P07Rik	RIKEN cDNA 4921507P07 gene
Chr14	86394190	86395773	-1.82851	0.0140979	Distal Intergenic	793948	NA	NA	NA
Chr6	38668006	38669031	-1.90981	0.01415	Exon (uc009bla.1/uc009bla.1, exon 1 of 5)	54937	ENSMUSG00000079598	Clec2l	C-type lectin domain family 2, member L
Chr9	57370198	57371197	2.30384	0.0141507	Promoter (1-2kb)	1159	ENSMUSG00000000088	Cox5a	cytochrome c oxidase subunit 5A
Chr13	47130694	47132460	-2.62045	0.014153	Exon (uc007qhq.2/22017, exon 4 of 9)	6053	ENSMUSG00000021376	Tpmt	thiopurine methyltransferase
Chr2	4192773	4193772	1.9341	0.0141757	Intron (uc008ieo.2/209630, intron 1 of 22)	-28159	ENSMUSG00000026657	Frmd4a	FERM domain containing 4A
Chr13	3571524	3573230	-1.87218	0.0142004	Exon (uc007piw.1/105203, exon 3 of 9)	11389	ENSMUSG00000033799	Tasor2	transcription activation suppressor family member 2
Chr5	74051240	74053086	-1.95048	0.0142102	Promoter (<=1kb)	773	ENSMUSG00000029155	Spata18	spermatogenesis associated 18
Chr1	80859999	80860998	1.96163	0.0142364	Distal Intergenic	-104871	NA	NA	NA
Chr10	74409959	74411125	-1.8117	0.0142456	Promoter (18-19kb)	-18851	ENSMUSG00000040009	Gnaz	guanine nucleotide binding protein, alpha z subunit
Chr2	112538899	112540810	-1.83789	0.0143028	Intron (uc008lpg.1/20192, intron 67 of 103)	-44956	ENSMUSG00000057378	Ryr3	ryanodine receptor 3
Chr9	27520672	27521833	-2.06129	0.0143218	Distal Intergenic	-77021	NA	NA	NA
Chr14	93204418	93205438	-2.43192	0.0143329	Distal Intergenic	1082142	NA	NA	NA
Chr16	80023754	80025202	-2.39727	0.0143337	Distal Intergenic	-932412	NA	NA	NA
ChrX	3214355	3215354	1.7939	0.0143758	Distal Intergenic	28275	NA	NA	NA
Chr14	96553420	96554940	-1.81498	0.0143765	Intron (uc007uuq.1/93688, intron 7 of 10)	272935	ENSMUSG00000034689	Spertl	spermatid associated like
ChrX	32824278	32825487	-1.76351	0.0143766	Distal Intergenic	-118695	NA	NA	NA
Chr4	51027926	51028925	1.95918	0.0143772	Distal Intergenic	-200625	NA	NA	NA
Chr4	128394230	128395332	-1.86255	0.0143884	Intron (uc008uvi.2/54383, intron 7 of 14)	6822	ENSMUSG00000028796	Phc2	polyhomeotic 2
ChrX	15072649	15073648	2.69989	0.0143887	Distal Intergenic	-384034	NA	NA	NA
Chr7	128350929	128352431	-1.89387	0.0144515	Distal Intergenic	89030	NA	NA	NA
Chr2	143819134	143820133	2.73091	0.0145424	Intron (uc008mqj.1/81910, intron 1 of 23)	16866	ENSMUSG00000027422	Rrbp1	ribosome binding protein 1
Chr17	50304514	50305977	-2.0317	0.0145432	Intron (uc008cyr.1/76438, intron 2 of 9)	23845	ENSMUSG00000039316	Rftn1	raftlin lipid raft linker 1
Chr4	49535305	49536304	2.26089	0.0145717	Promoter (1-2kb)	1216	ENSMUSG00000039634	Zfp189	zinc finger protein 189
Chr5	21158175	21159730	-1.62846	0.0145963	Exon (uc008wos.1/67211, exon 4 of 6)	6373	ENSMUSG00000038525	Armc10	armadillo repeat containing 10
Chr4	102246600	102247599	2.34959	0.0145977	Intron (uc008twj.2/18578, intron 6 of 14)	3935	ENSMUSG00000028525	Pde4b	phosphodiesterase 4B, cAMP specific
Chr8	24549643	24550642	2.00323	0.0146292	Intron (uc009lev.2/20377, intron 2 of 2)	27669	ENSMUSG00000031548	Sfrp1	secreted frizzled-related protein 1
Chr9	49053619	49054618	3.03603	0.0146411	Promoter (4-5kb)	-4018	ENSMUSG00000054156	Gm4894	predicted gene 4894
Chr7	123247956	123248955	2.24879	0.0146423	3' UTR	11062	ENSMUSG00000030663	1110004F10Rik	RIKEN cDNA 1110004F10 gene
Chr9	24237211	24238297	-2.22823	0.0146473	Promoter (8-9kb)	-8808	ENSMUSG00000043067	Dpy19l1	dpy-19-like 1 (C. elegans)
Chr5	112932844	112933843	1.86281	0.0146523	Intron (uc008ytk.1/56747, intron 1 of 16)	-28238	ENSMUSG00000058153	Sez6l	seizure related 6 homolog like
Chr10	62609028	62610200	-1.85973	0.0146656	Intron (uc007fjy.2/68802, intron 9 of 19)	-23596	ENSMUSG00000020067	Mypn	myopalladin
Chr9	80517672	80518803	-1.9957	0.0146678	Distal Intergenic	-158627	NA	NA	NA
Chr13	72500358	72501762	-1.93889	0.0146974	Distal Intergenic	264250	NA	NA	NA
Chr10	18324467	18325602	-2.03945	0.0147388	Intron (uc007emn.1/215821, intron 26 of 33)	-58585	ENSMUSG00000019853	Hebp2	heme binding protein 2
Chr1	165236458	165238147	-1.59711	0.0147485	Intron (uc007dhh.1/18933, intron 1 of 4)	5634	ENSMUSG00000026586	Prrx1	paired related homeobox 1
Chr14	50417370	50418536	1.89356	0.0147695	Promoter (14-15kb)	-14328	ENSMUSG00000036242	Armh4	armadillo-like helical domain containing 4
Chr7	28535369	28536657	-1.95013	0.0148165	Promoter (14-15kb)	-14035	ENSMUSG00000109143	Gm10046	predicted gene 10046
Chr4	36272306	36273901	-2.07936	0.0148403	Intron (uc008sha.2/242384, intron 3 of 8)	318585	ENSMUSG00000077851	Mir876	microRNA 876
Chr4	115082953	115084472	-1.68592	0.0148522	Promoter (<=1kb)	0	ENSMUSG00000078597	Cyp4a12b	cytochrome P450, family 4, subfamily a, polypeptide 12B
Chr5	9631470	9632616	-2.12478	0.0149107	Intron (uc008wll.1/108069, intron 1 of 5)	92736	ENSMUSG00000003974	Grm3	glutamate receptor, metabotropic 3
Chr4	49830681	49831680	2.68999	0.0149475	Intron (uc012ded.1/242443, intron 1 of 8)	26273	ENSMUSG00000039579	Grin3a	glutamate receptor ionotropic, NMDA3A
Chr5	136589045	136590044	2.5048	0.0149642	Promoter (2-3kb)	-2517	ENSMUSG00000039771	Polr2j	polymerase (RNA) II (DNA directed) polypeptide J
Chr11	81667930	81669411	-1.83285	0.0150342	Intron (uc007kmm.1/11418, intron 1 of 9)	112487	ENSMUSG00000020704	Asic2	acid-sensing (proton-gated) ion channel 2
Chr3	96875772	96877295	-1.9771	0.0150385	Distal Intergenic	39433	NA	NA	NA
Chr7	121808423	121809894	-1.56961	0.0150426	Distal Intergenic	-28552	NA	NA	NA
Chr4	60641370	60642369	2.29856	0.015059	Intron (uc008tao.2/100041687, intron 2 of 6)	32898	ENSMUSG00000073834	Mup11	major urinary protein 11
Chr16	16059758	16060757	1.93048	0.0151236	Intron (uc007yhy.1/224008, intron 1 of 15)	12781	ENSMUSG00000041974	Spidr	scaffolding protein involved in DNA repair
Chr19	61265333	61266332	1.70261	0.0151299	Promoter (13-14kb)	-13121	ENSMUSG00000094649	Gm7102	predicted gene 7102
Chr2	83066907	83068260	-2.14145	0.0151399	Distal Intergenic	-416475	NA	NA	NA
Chr12	16347101	16348755	-2.31229	0.0151592	Distal Intergenic	247821	NA	NA	NA
Chr2	148875804	148876948	-1.98355	0.0151959	Distal Intergenic	-174600	NA	NA	NA
Chr7	144084799	144085998	-2.29061	0.0152019	Promoter (<=1kb)	-296	ENSMUSG00000054612	Mgmt	O-6-methylguanine-DNA methyltransferase
Chr11	67165272	67166447	-1.92178	0.0152116	Promoter (11-12kb)	-11840	ENSMUSG00000060180	Myh13	myosin, heavy polypeptide 13, skeletal muscle
Chr13	58554260	58555259	2.47497	0.0152165	Distal Intergenic	47833	NA	NA	NA
Chr9	74451129	74452128	1.86855	0.0152178	Distal Intergenic	-244142	NA	NA	NA
ChrX	136163244	136164243	1.94278	0.0152222	Intron (uc009uki.2/66889, intron 1 of 6)	18085	ENSMUSG00000031438	Rnf128	ring finger protein 128
Chr7	127183210	127184209	2.72012	0.0152587	Distal Intergenic	-61731	NA	NA	NA
Chr1	153465224	153466985	-1.82845	0.0152809	Intron (uc011wtn.1/63913, intron 1 of 5)	46721	ENSMUSG00000026483	Fam129a	family with sequence similarity 129, member A
Chr1	169020503	169022968	-1.77682	0.0152946	3' UTR	88955	ENSMUSG00000060568	Fam78b	family with sequence similarity 78, member B
Chr2	53036073	53037744	-1.7319	0.0153081	Exon (uc008jrk.1/56194, exon 3 of 26)	12477	ENSMUSG00000061136	Prpf40a	pre-mRNA processing factor 40A
Chr12	120793342	120795535	1.42759	0.0153114	Distal Intergenic	111459	NA	NA	NA
ChrX	130939000	130939999	2.55955	0.01534	Promoter (<=1kb)	0	ENSMUSG00000000223	Drp2	dystrophin related protein 2
Chr18	67667476	67668475	2.39036	0.0153414	Intron (uc008fml.1/68166, intron 6 of 13)	7936	ENSMUSG00000024533	Spire1	spire type actin nucleation factor 1
Chr12	3783296	3784295	2.18229	0.0153545	Distal Intergenic	-22228	NA	NA	NA
Chr14	93187161	93188532	-1.61564	0.0153546	Distal Intergenic	1099048	NA	NA	NA
Chr11	21436044	21437781	-1.87367	0.015391	Distal Intergenic	-24861	NA	NA	NA
Chr9	25560257	25561256	2.02775	0.015398	Distal Intergenic	271075	NA	NA	NA
Chr1	65978774	65980425	-2.03228	0.015404	Distal Intergenic	5678	NA	NA	NA
Chr3	16794891	16796142	-2.70441	0.0154153	Distal Intergenic	711708	NA	NA	NA
Chr15	59658472	59659471	2.66448	0.0154164	Distal Intergenic	178263	NA	NA	NA
Chr6	108214193	108215206	-1.82115	0.0154236	Intron (uc009ddg.1/16438, intron 4 of 5)	11241	ENSMUSG00000030102	Itpr1	inositol 1,4,5-trisphosphate receptor 1
Chr16	36142578	36143577	2.81015	0.0154553	Promoter (11-12kb)	-11303	ENSMUSG00000034362	Csta1	cystatin A1
Chr9	123601838	123603502	-1.82303	0.0154805	Promoter (13-14kb)	-13888	ENSMUSG00000036814	Slc6a20a	solute carrier family 6 (neurotransmitter transporter), member 20A
Chr12	104836093	104837092	2.34964	0.0154828	Exon (uc007ovw.2/74521, exon 16 of 25)	22174	ENSMUSG00000021209	Ppp4r4	protein phosphatase 4, regulatory subunit 4
Chr7	118419007	118420038	-2.17097	0.0155448	Distal Intergenic	-152802	NA	NA	NA
Chr11	31332957	31334237	-2.02454	0.015594	Distal Intergenic	-62896	NA	NA	NA
Chr5	114685030	114686487	-2.08581	0.0156025	Exon (uc008yzi.2/100705, exon 39 of 52)	35242	ENSMUSG00000042010	Acacb	acetyl-Coenzyme A carboxylase beta
Chr8	71196472	71197567	1.66505	0.0156038	Intron (uc009lwf.2/234356, intron 1 of 9)	61474	ENSMUSG00000036356	Csgalnact1	chondroitin sulfate N-acetylgalactosaminyltransferase 1
Chr18	75916061	75917060	2.24058	0.0156269	Distal Intergenic	-58711	NA	NA	NA
Chr10	102980017	102981354	-1.84332	0.0156391	Intron (uc007gyl.1/uc007gyl.1, intron 1 of 2)	149540	ENSMUSG00000019894	Slc6a15	solute carrier family 6 (neurotransmitter transporter), member 15
ChrX	50410164	50411188	-1.87827	0.0156641	Promoter (2-3kb)	-2638	ENSMUSG00000065418	Mir322	microRNA 322
Chr10	30112505	30113795	-2.37389	0.0156967	Distal Intergenic	-192159	NA	NA	NA
Chr5	121843010	121844009	2.51325	0.0157097	Promoter (3-4kb)	-3982	ENSMUSG00000042719	Naa25	N(alpha)-acetyltransferase 25, NatB auxiliary subunit
Chr2	52564901	52565949	-2.30494	0.0157244	Exon (uc008jre.1/56324, exon 11 of 14)	-32800	ENSMUSG00000017412	Cacnb4	calcium channel, voltage-dependent, beta 4 subunit
Chr4	21333008	21334484	-1.83007	0.0157326	Distal Intergenic	278626	NA	NA	NA
Chr17	26984556	26985555	2.38213	0.015778	Promoter (6-7kb)	-6046	ENSMUSG00000015579	Nkx2-5	NK2 homeobox 5
Chr13	86431641	86432640	1.94156	0.0158006	Distal Intergenic	-245241	NA	NA	NA
Chr17	81106048	81107047	2.40693	0.0159111	Intron (uc008drk.1/225028, intron 1 of 33)	20386	ENSMUSG00000024242	Map4k3	mitogen-activated protein kinase kinase kinase kinase 3
Chr14	18779195	18780319	-2.29341	0.0159535	Intron (uc007shk.2/21834, intron 3 of 9)	-33839	ENSMUSG00000021779	Thrb	thyroid hormone receptor beta
Chr12	5685591	5686601	-1.71375	0.0160019	Distal Intergenic	302283	NA	NA	NA
Chr18	24483358	24484357	2.08309	0.0160161	Distal Intergenic	103314	NA	NA	NA
Chr13	69318663	69319683	-1.98207	0.0160356	Distal Intergenic	-180244	NA	NA	NA
Chr5	128120332	128121331	2.05095	0.0160432	Intron (uc008zsd.1/319804, intron 1 of 11)	7700	ENSMUSG00000049971	Glt1d1	glycosyltransferase 1 domain containing 1
Chr8	14240923	14242500	1.85343	0.0160527	Intron (uc009kyy.2/244310, intron 2 of 15)	-139234	ENSMUSG00000047495	Dlgap2	DLG associated protein 2
Chr16	44846029	44847862	-1.6997	0.0160611	Promoter (19-20kb)	-19348	ENSMUSG00000090176	Cd200r2	Cd200 receptor 2
Chr14	117269778	117271010	-1.99133	0.0160726	Distal Intergenic	-53527	NA	NA	NA
Chr7	129345723	129346722	1.90969	0.0160732	Promoter (15-16kb)	-15993	ENSMUSG00000030866	Ern2	endoplasmic reticulum (ER) to nucleus signalling 2
Chr6	48304849	48305848	2.07788	0.0160918	Intron (uc009btx.1/uc009btx.1, intron 1 of 4)	-39737	ENSMUSG00000042810	Krba1	KRAB-A domain containing 1
Chr9	41752455	41753787	-1.78976	0.0160966	Distal Intergenic	178585	NA	NA	NA
Chr9	89540226	89541225	1.81324	0.0160981	Distal Intergenic	-22402	NA	NA	NA
Chr4	44882177	44883205	-2.1774	0.0161066	Intron (uc008sry.2/319885, intron 2 of 5)	-53820	ENSMUSG00000035649	Zcchc7	zinc finger, CCHC domain containing 7
Chr9	63597688	63598687	2.56678	0.0161098	Intron (uc009qbi.1/17127, intron 1 of 8)	7114	ENSMUSG00000032402	Smad3	SMAD family member 3
Chr2	94750937	94751936	2.68383	0.0161227	Distal Intergenic	-472633	NA	NA	NA
ChrX	34118630	34119629	2.44156	0.0161335	Promoter (18-19kb)	-18591	ENSMUSG00000006373	Pgrmc1	progesterone receptor membrane component 1
Chr15	42985639	42987261	-1.86295	0.0161457	Intron (uc007vpg.1/239405, intron 2 of 5)	15103	ENSMUSG00000051920	Rspo2	R-spondin 2
Chr5	129726283	129727520	-2.06372	0.0161507	Distal Intergenic	123658	NA	NA	NA
Chr8	83900368	83901367	2.40412	0.0162909	Intron (uc009mje.1/234515, intron 1 of 24)	33913	ENSMUSG00000037940	Inpp4b	inositol polyphosphate-4-phosphatase, type II
Chr8	115406731	115408507	-1.81039	0.0162985	Distal Intergenic	-182655	NA	NA	NA
Chr4	146176633	146177632	1.93149	0.0163072	Intron (uc008vse.1/433791, intron 1 of 3)	-41930	NA	Znf41-ps	ZNF41, pseudogene
Chr15	78549842	78551698	-1.89317	0.0163347	Promoter (<=1kb)	-641	ENSMUSG00000043460	Elfn2	leucine rich repeat and fibronectin type III, extracellular 2
ChrX	143325534	143326533	2.9356	0.0163437	Distal Intergenic	-70523	NA	NA	NA
Chr11	93991691	93992690	2.28743	0.0163935	Distal Intergenic	7560	NA	NA	NA
Chr12	25380498	25381881	-1.65359	0.0164713	Promoter (11-12kb)	-11238	ENSMUSG00000020649	Rrm2	ribonucleotide reductase M2
Chr12	99058024	99059356	1.91817	0.0164871	Distal Intergenic	438191	NA	NA	NA
Chr3	100627367	100628366	2.57257	0.016488	Promoter (1-2kb)	-1016	ENSMUSG00000051076	Vtcn1	V-set domain containing T cell activation inhibitor 1
Chr13	11219312	11220311	2.33727	0.0165106	Distal Intergenic	-394008	NA	NA	NA
Chr2	86580230	86581573	-2.06086	0.0165157	Promoter (6-7kb)	-6463	ENSMUSG00000111711	Olfr1089	olfactory receptor 1089
Chr15	29261424	29262423	1.92491	0.0165217	Distal Intergenic	-839925	NA	NA	NA
ChrX	104796266	104797587	-2.35175	0.0166476	Distal Intergenic	58345	NA	NA	NA
Chr1	104975131	104976644	-1.93417	0.0166547	Distal Intergenic	-1688752	NA	NA	NA
Chr6	28024121	28026101	-1.65494	0.0166613	Intron (uc009bcj.1/14823, intron 1 of 9)	50325	ENSMUSG00000024211	Grm8	glutamate receptor, metabotropic 8
Chr17	77294863	77295987	-1.87128	0.0166655	Distal Intergenic	1034500	NA	NA	NA
Chr12	9955094	9956205	-1.73396	0.0166848	Distal Intergenic	373846	NA	NA	NA
Chr1	104792515	104793514	1.91215	0.0167175	Distal Intergenic	-1871882	NA	NA	NA
Chr11	116607077	116608552	-1.67233	0.0167446	Promoter (4-5kb)	-4929	NA	BC018473	cDNA sequence BC018473
Chr12	65825994	65826993	2.4892	0.0167578	Distal Intergenic	-191905	NA	NA	NA
Chr1	181540216	181541925	-1.60726	0.0167649	Exon (uc007dvo.1/226744, exon 9 of 11)	-56437	ENSMUSG00000038936	Sccpdh	saccharopine dehydrogenase (putative)
Chr16	39719531	39720530	2.70618	0.0168073	Distal Intergenic	-263954	NA	NA	NA
ChrX	145527749	145528748	2.24593	0.0168314	Promoter (3-4kb)	-3747	ENSMUSG00000094885	Ott	ovary testis transcribed
Chr14	24200792	24203219	-1.90917	0.0168371	Promoter (2-3kb)	2356	ENSMUSG00000063142	Kcnma1	potassium large conductance calcium-activated channel, subfamily M, alpha member 1
Chr16	81748085	81749248	-1.74623	0.016881	Distal Intergenic	547143	NA	NA	NA
Chr7	136520721	136521874	-1.79911	0.0168989	Intron (uc009jzl.1/381925, intron 5 of 6)	120113	ENSMUSG00000070366	Plpp4	phospholipid phosphatase 4
Chr1	96683691	96685064	-2.24336	0.0169126	Distal Intergenic	-525141	NA	NA	NA
Chr11	76796173	76797172	1.88448	0.0169548	Promoter (14-15kb)	-14927	ENSMUSG00000020838	Slc6a4	solute carrier family 6 (neurotransmitter transporter, serotonin), member 4
Chr4	74097156	74098834	-1.72454	0.0169672	Distal Intergenic	199373	NA	NA	NA
Chr7	80566857	80568055	-1.998	0.0169696	Distal Intergenic	30744	NA	NA	NA
Chr8	95092040	95093039	2.58488	0.0169823	Distal Intergenic	-105262	NA	NA	NA
ChrX	140943248	140944247	3.25209	0.0171065	Intron (uc009umv.1/22067, intron 2 of 10)	46535	NA	Mageb16-ps1	melanoma antigen family B, 16, pseudogene 1
Chr9	112608933	112609932	2.52014	0.0171311	Distal Intergenic	449855	NA	NA	NA
Chr13	8181661	8182660	2.62721	0.0171351	Promoter (19-20kb)	-19495	ENSMUSG00000052551	Adarb2	adenosine deaminase, RNA-specific, B2
Chr12	89446841	89448142	-2.43892	0.0171407	Distal Intergenic	-26503	NA	NA	NA
Chr6	49940791	49941790	2.66484	0.0171498	Distal Intergenic	-118450	NA	NA	NA
Chr12	48128580	48129958	1.69724	0.0171735	Distal Intergenic	-208818	NA	NA	NA
Chr12	118953399	118954622	-1.89444	0.0171824	Exon (uc007pib.2/217944, exon 16 of 28)	-127712	ENSMUSG00000021175	Cdca7l	cell division cycle associated 7 like
Chr6	66159940	66161085	-1.78227	0.0171847	Distal Intergenic	257375	NA	NA	NA
Chr13	94951525	94952615	-1.86105	0.0171999	Intron (uc007rlp.1/218454, intron 3 of 3)	7578	ENSMUSG00000045312	Lhfpl2	lipoma HMGIC fusion partner-like 2
Chr16	25606020	25607019	2.41073	0.0172057	Distal Intergenic	-76832	NA	NA	NA
Chr15	27279155	27280599	-1.61681	0.017233	Distal Intergenic	103278	NA	NA	NA
Chr11	87665360	87666359	1.8856	0.0172492	Promoter (<=1kb)	-368	ENSMUSG00000034121	Mks1	Meckel syndrome, type 1
Chr9	7296487	7297486	-2.17809	0.0172729	Distal Intergenic	23973	NA	NA	NA
Chr10	50491413	50492412	2.70548	0.0172813	Intron (uc007fak.2/77987, intron 36 of 41)	-123045	ENSMUSG00000019913	Sim1	single-minded family bHLH transcription factor 1
Chr7	16638955	16639954	2.31428	0.0172954	Promoter (17-18kb)	-17337	ENSMUSG00000078796	Zfp541	zinc finger protein 541
Chr16	27975528	27976648	-1.67259	0.0173479	Distal Intergenic	125512	NA	NA	NA
Chr5	92324094	92325481	-1.75407	0.0173793	Distal Intergenic	-65934	NA	NA	NA
Chr17	74050950	74052376	-1.79697	0.0173895	Intron (uc008dnk.2/71685, intron 1 of 14)	7415	ENSMUSG00000024064	Galnt14	polypeptide N-acetylgalactosaminyltransferase 14
Chr6	29250083	29251930	-1.73473	0.0174123	Promoter (17-18kb)	-17210	ENSMUSG00000039742	Fam71f1	family with sequence similarity 71, member F1
Chr7	7190497	7192493	-1.75315	0.017444	Intron (uc009fcm.1/76229, intron 5 of 6)	7546	ENSMUSG00000095730	Vmn2r29	vomeronasal 2, receptor 29
Chr15	13041188	13042682	-1.83066	0.0174701	Intron (uc007vif.1/12563, intron 1 of 11)	60712	ENSMUSG00000039385	Cdh6	cadherin 6
Chr4	25780107	25781112	-1.70923	0.0174929	Distal Intergenic	-52957	NA	NA	NA
Chr18	40297920	40298973	-1.93885	0.0175158	Distal Intergenic	80080	NA	NA	NA
Chr2	93621823	93622822	2.47236	0.0175264	Intron (uc008lge.2/14043, intron 8 of 11)	39016	ENSMUSG00000027198	Ext2	exostosin glycosyltransferase 2
Chr7	79666172	79667171	1.84949	0.0175372	Distal Intergenic	-214691	NA	NA	NA
Chr13	88715653	88717006	-1.87422	0.0175445	Distal Intergenic	-244071	NA	NA	NA
Chr10	43847898	43849715	-1.74771	0.0175509	Distal Intergenic	-40538	NA	NA	NA
Chr13	115896520	115898052	-1.85995	0.0175524	Promoter (4-5kb)	-4348	ENSMUSG00000042284	Itga1	integrin alpha 1
Chr18	21756012	21757376	-2.03928	0.0175673	Intron (uc008efi.1/225266, intron 2 of 7)	53493	ENSMUSG00000042514	Klhl14	kelch-like 14
Chr18	11149679	11151167	-1.83652	0.0175718	Distal Intergenic	97171	NA	NA	NA
ChrX	3196198	3197197	2.05652	0.017594	Distal Intergenic	46432	NA	NA	NA
Chr6	24876280	24877750	-1.74664	0.017605	Distal Intergenic	28375	NA	NA	NA
Chr13	105323026	105324157	-2.04085	0.0176087	Distal Intergenic	245073	NA	NA	NA
Chr14	21576308	21577307	3.48849	0.0176295	Intron (uc007skt.1/12325, intron 12 of 20)	-22524	ENSMUSG00000039308	Ndst2	N-deacetylase/N-sulfotransferase (heparan glucosaminyl) 2
Chr13	119750399	119751398	3.18686	0.0176499	Distal Intergenic	246893	NA	NA	NA
Chr15	30662598	30663877	-1.93864	0.0176506	Intron (uc007vjz.1/18163, intron 9 of 22)	-186556	ENSMUSG00000022240	Ctnnd2	catenin (cadherin associated protein), delta 2
Chr19	25348170	25349962	-1.68532	0.0176857	5' UTR	36478	ENSMUSG00000032702	Kank1	KN motif and ankyrin repeat domains 1
Chr1	111522664	111524333	-1.93467	0.0177037	Distal Intergenic	-354571	NA	NA	NA
ChrX	27166167	27167166	2.05724	0.0177071	Intron (uc009svs.1/uc009svs.1, intron 1 of 3)	83989	ENSMUSG00000073247	Gm10486	predicted gene 10486
Chr14	53113152	53114466	-1.96593	0.0177075	Promoter (<=1kb)	904	ENSMUSG00000059887	Olfr1507	olfactory receptor 1507
Chr16	56199425	56201257	-1.70696	0.0177375	Promoter (3-4kb)	-3169	ENSMUSG00000035270	Impg2	interphotoreceptor matrix proteoglycan 2
Chr8	123558008	123559571	-1.68608	0.0177562	Distal Intergenic	-48803	NA	NA	NA
Chr1	50518061	50519060	2.06999	0.0177695	Distal Intergenic	-447746	NA	NA	NA
Chr5	124353017	124354249	-1.61483	0.0177891	Promoter (3-4kb)	-3035	ENSMUSG00000023106	Denr	density-regulated protein
Chr3	146469989	146471827	-1.63762	0.0177949	Intron (uc008rrv.2/18749, intron 1 of 9)	4083	ENSMUSG00000005034	Prkacb	protein kinase, cAMP dependent, catalytic, beta
Chr3	116312089	116313088	2.68439	0.017811	Intron (uc008rcm.1/72776, intron 6 of 13)	4417	ENSMUSG00000033439	Trmt13	tRNA methyltransferase 13
Chr12	61209462	61210461	2.22384	0.01782	Distal Intergenic	-888992	NA	NA	NA
Chr2	144902436	144903435	2.35213	0.0178258	Distal Intergenic	-90414	NA	NA	NA
Chr10	99861824	99863774	-1.8686	0.0178349	Promoter (16-17kb)	-16630	ENSMUSG00000094314	Gm4301	predicted gene 4301
Chr17	11166582	11167581	2.6185	0.0178491	Intron (uc008akj.1/50873, intron 1 of 6)	133332	ENSMUSG00000023826	Prkn	parkin RBR E3 ubiquitin protein ligase
Chr15	58779233	58781089	-1.89303	0.0178552	Exon (uc007vtz.2/211401, exon 11 of 14)	13868	ENSMUSG00000022354	Ndufb9	NADH:ubiquinone oxidoreductase subunit B9
Chr4	77416921	77417920	2.27953	0.0178809	Intron (uc008tjp.1/19266, intron 2 of 14)	439879	ENSMUSG00000028399	Ptprd	protein tyrosine phosphatase, receptor type, D
Chr8	127400344	127401545	-1.62253	0.0178945	Exon (uc009nxu.2/14712, exon 5 of 13)	13411	ENSMUSG00000031985	Gnpat	glyceronephosphate O-acyltransferase
Chr13	97519338	97520359	-1.8504	0.0178962	Distal Intergenic	-78447	NA	NA	NA
Chr11	56783582	56784737	-1.80394	0.0179112	Distal Intergenic	-40456	NA	NA	NA
Chr17	84797829	84798983	-1.76817	0.0179116	Intron (uc012axy.1/240174, intron 22 of 37)	-29722	ENSMUSG00000024251	Thada	thyroid adenoma associated
Chr8	72261629	72262628	1.9317	0.0179153	Downstream (2-3kb)	5858	ENSMUSG00000092260	Zfp963	zinc finger protein 963
Chr13	114845707	114846843	-1.82077	0.017966	Intron (uc007rxj.1/218639, intron 4 of 4)	260991	ENSMUSG00000042348	Arl15	ADP-ribosylation factor-like 15
Chr14	36390640	36392144	-2.00045	0.0179915	Intron (uc007tbj.1/14803, intron 15 of 15)	233020	ENSMUSG00000041068	4930596D02Rik	RIKEN cDNA 4930596D02 gene
Chr9	114927725	114928829	-1.87352	0.0180034	Promoter (1-2kb)	1944	ENSMUSG00000040875	Osbpl10	oxysterol binding protein-like 10
ChrX	119787421	119788429	-2.01626	0.0180085	Distal Intergenic	-276427	NA	NA	NA
Chr2	55728722	55729891	-1.9094	0.0180088	Distal Intergenic	439530	NA	NA	NA
Chr9	62688217	62689216	2.02387	0.018031	Promoter (1-2kb)	1623	ENSMUSG00000032245	Cln6	ceroid-lipofuscinosis, neuronal 6
Chr18	35475574	35477146	-1.68169	0.0180367	Intron (uc008emc.2/81500, intron 7 of 9)	-100896	ENSMUSG00000071862	Lrrtm2	leucine rich repeat transmembrane neuronal 2
Chr8	76399645	76400644	2.39552	0.0180476	Distal Intergenic	-523190	NA	NA	NA
Chr1	167358595	167359594	2.79247	0.0180578	Exon (uc007djb.2/74106, exon 2 of 19)	31000	ENSMUSG00000026571	Dcaf6	DDB1 and CUL4 associated factor 6
Chr16	49556926	49557983	-1.74053	0.0180666	Distal Intergenic	-141424	NA	NA	NA
Chr17	13564210	13565209	2.22679	0.0181017	Intron (uc008alz.2/21460, intron 11 of 12)	16028	ENSMUSG00000052469	Tcp10c	t-complex protein 10c
Chr7	147654675	147655694	-1.6955	0.0181068	Promoter (2-3kb)	2573	ENSMUSG00000056883	Olfr533	olfactory receptor 533
Chr7	132876294	132877293	2.49129	0.0181083	Intron (uc009jqm.1/233865, intron 2 of 27)	24904	ENSMUSG00000032743	D430042O09Rik	RIKEN cDNA D430042O09 gene
Chr11	66894297	66895646	-1.86764	0.0181707	Promoter (2-3kb)	2461	ENSMUSG00000020908	Myh3	myosin, heavy polypeptide 3, skeletal muscle, embryonic
Chr4	125715226	125716795	-1.75868	0.0182092	Promoter (7-8kb)	-7377	ENSMUSG00000028861	Mrps15	mitochondrial ribosomal protein S15
Chr3	91823910	91825609	-1.60933	0.0182221	Intron (uc008qdi.2/242100, intron 1 of 6)	5405	ENSMUSG00000042244	Pglyrp3	peptidoglycan recognition protein 3
Chr2	5252468	5254056	-2.27129	0.0182291	Intron (uc008ifp.1/227541, intron 6 of 10)	193646	ENSMUSG00000026676	Ccdc3	coiled-coil domain containing 3
Chr8	23435200	23437190	-2.10025	0.018237	Exon (uc009lcy.1/234129, exon 13 of 28)	41287	ENSMUSG00000031481	Tpte	transmembrane phosphatase with tensin homology
Chr14	67295961	67297583	-1.68207	0.0182457	Intron (uc007uki.1/11549, intron 2 of 2)	41866	ENSMUSG00000045875	Adra1a	adrenergic receptor, alpha 1a
Chr2	57949772	57951369	-1.70573	0.0182488	Distal Intergenic	-44609	NA	NA	NA
Chr13	117841362	117843598	-1.6414	0.0182661	Distal Intergenic	-27039	NA	NA	NA
Chr8	72488657	72489656	1.77988	0.0183098	Intron (uc009lyf.2/234366, intron 1 of 12)	8626	ENSMUSG00000036180	Gatad2a	GATA zinc finger domain containing 2A
Chr14	99899270	99900269	2.04481	0.0183108	Distal Intergenic	201360	NA	NA	NA
Chr7	46626777	46627776	1.75116	0.0183235	Distal Intergenic	40754	NA	NA	NA
Chr1	7403134	7404579	-1.87376	0.0183496	Distal Intergenic	252968	NA	NA	NA
Chr18	49266116	49267865	-1.71055	0.0183571	Distal Intergenic	-415078	NA	NA	NA
Chr2	138204401	138206030	-2.20089	0.0183681	Distal Intergenic	100172	NA	NA	NA
Chr8	64303399	64304658	2.83644	0.018381	Intron-(uc009luf.1/72333,-intron-2-of-21)	-64513	ENSMUSG00000058056	Palld	palladin, cytoskeletal associated protein
Chr4	8908293	8909292	2.83514	0.0183819	Distal Intergenic	124475	NA	NA	NA
Chr7	112701470	112703171	-1.98728	0.0184175	Promoter (<=1kb)	0	ENSMUSG00000037049	Smpd1	sphingomyelin phosphodiesterase 1, acid lysosomal
Chr13	13317076	13318075	2.2795	0.0184216	Distal Intergenic	42027	NA	NA	NA
Chr5	141294682	141296459	-1.81823	0.0184346	Intron (uc009aih.1/14673, intron 1 of 3)	9926	ENSMUSG00000000149	Gna12	guanine nucleotide binding protein, alpha 12
Chr17	89644361	89645360	2.51444	0.0185237	Distal Intergenic	-44346	NA	NA	NA
Chr17	72402610	72404283	-2.18666	0.0185424	Intron (uc008dmi.1/74355, intron 1 of 4)	20875	ENSMUSG00000024054	Smchd1	SMC hinge domain containing 1
Chr8	70958111	70959738	-1.83677	0.0185751	Intron (uc009lwf.2/234356, intron 4 of 9)	157684	ENSMUSG00000053886	Sh2d4a	SH2 domain containing 4A
Chr16	48988123	48989122	3.81359	0.0186066	Intron (uc007zjz.2/224170, intron 1 of 30)	5103	ENSMUSG00000064061	Dzip3	DAZ interacting protein 3, zinc finger
Chr15	28651769	28653489	-1.87025	0.0186141	Distal Intergenic	518248	NA	NA	NA
Chr7	135464652	135465651	2.62658	0.0186606	Distal Intergenic	-23007	NA	NA	NA
Chr8	104769762	104770942	-1.72905	0.0187099	Distal Intergenic	538069	NA	NA	NA
Chr12	116343290	116344289	1.74314	0.0187244	Exon (uc011yvj.1/uc011yvj.1, exon 115 of 737)	-941646	ENSMUSG00000042063	Zfp386	zinc finger protein 386 (Kruppel-like)
Chr7	141077971	141078970	2.52954	0.0187724	3' UTR	73978	ENSMUSG00000054555	Adam12	a disintegrin and metallopeptidase domain 12 (meltrin alpha)
Chr1	136328090	136329089	2.29075	0.018828	3' UTR	15753	ENSMUSG00000026457	Adipor1	adiponectin receptor 1
Chr3	31551964	31552963	2.1352	0.0188777	Distal Intergenic	-248662	NA	NA	NA
Chr1	56831985	56832984	1.8015	0.0188858	Distal Intergenic	-137690	NA	NA	NA
Chr1	39232507	39233506	2.62045	0.0188873	Promoter (17-18kb)	-17611	ENSMUSG00000026077	Npas2	neuronal PAS domain protein 2
Chr13	63799170	63800964	-1.65455	0.018896	Intron (uc007qxz.1/uc007qxz.1, intron 4 of 4)	-115664	ENSMUSG00000021470	Ercc6l2	excision repair cross-complementing rodent repair deficiency, complementation group 6 like 2
Chr3	107867064	107868223	-2.10524	0.0189077	Distal Intergenic	12158	NA	NA	NA
Chr4	78342348	78343347	2.98297	0.0189187	Distal Intergenic	-484549	NA	NA	NA
Chr17	21271199	21272863	-1.70047	0.018932	Distal Intergenic	-92927	NA	NA	NA
Chr6	78546092	78547866	-1.8638	0.0189607	Distal Intergenic	-127224	NA	NA	NA
Chr19	29717236	29719065	-1.7052	0.0189827	Intron (uc008hdu.1/226090, intron 2 of 14)	3845	ENSMUSG00000046324	Ermp1	endoplasmic reticulum metallopeptidase 1
Chr1	157139802	157140801	2.2254	0.0189838	Exon (uc007dbf.1/19775, exon 12 of 15)	15971	ENSMUSG00000026469	Xpr1	xenotropic and polytropic retrovirus receptor 1
Chr6	50545357	50546378	2.98412	0.0189937	Promoter-(<=1kb)	211	ENSMUSG00000029828	4921507P07Rik	RIKEN cDNA- 921507P07 gene
Chr13	13849222	13850221	2.19562	0.019	Exon (uc007pmj.1/17101, exon 47 of 53)	-26585	ENSMUSG00000021303	Gng4	guanine nucleotide binding protein (G protein), gamma 4
Chr6	129402297	129403848	-1.88647	0.0190324	Promoter (<=1kb)	-279	ENSMUSG00000033082	Clec1a	C-type lectin domain family 1, member a
Chr1	157039098	157040837	-1.88678	0.0190552	Promoter (<=1kb)	539	ENSMUSG00000026470	Stx6	syntaxin 6
Chr10	18372250	18373611	-2.14921	0.0190553	Exon (uc007emn.1/215821, exon 10 of 34)	89953	ENSMUSG00000019852	Arfgef3	ARFGEF family member 3
Chr5	9544880	9546716	-1.91317	0.0190665	Intron (uc008wll.1/108069, intron 3 of 5)	169176	ENSMUSG00000077896	Mir879	microRNA 879
Chr11	121797010	121798320	-1.60632	0.0190709	Distal Intergenic	105478	NA	NA	NA
Chr12	84215229	84216427	-1.7193	0.0191545	Intron (uc007oda.1/50779, intron 14 of 16)	496743	ENSMUSG00000021219	Rgs6	regulator of G-protein signaling 6
ChrX	13850624	13851664	-2.05039	0.0191779	Distal Intergenic	62350	NA	NA	NA
Chr18	20792022	20793021	2.29024	0.0192025	Distal Intergenic	-30730	NA	NA	NA
Chr19	20530292	20531291	1.90335	0.0192383	Distal Intergenic	-35914	NA	NA	NA
Chr7	65352155	65353755	-1.89896	0.0192535	Distal Intergenic	505612	NA	NA	NA
Chr14	104821432	104822935	-1.86246	0.0192646	Intron (uc007uxa.1/uc007uxa.1, intron 1 of 4)	44281	ENSMUSG00000048349	Pou4f1	POU domain, class 4, transcription factor 1
Chr5	131090988	131092316	-1.52826	0.019279	Intron (uc008zum.2/140904, intron 3 of 6)	166326	ENSMUSG00000060371	Caln1	calneuron 1
Chr9	74515925	74516924	1.70714	0.0193133	Distal Intergenic	-179346	NA	NA	NA
Chr16	43901828	43902827	2.43445	0.0193941	Promoter (4-5kb)	-4074	ENSMUSG00000022701	Ccdc191	coiled-coil domain containing 191
Chr14	11628972	11629971	2.14941	0.0193977	Intron (uc011zfx.1/14198, intron 1 of 8)	328138	ENSMUSG00000060579	Fhit	fragile histidine triad gene
Chr14	68604512	68606098	-1.92941	0.0194329	Distal Intergenic	-52883	NA	NA	NA
Chr17	74984782	74986323	-1.59523	0.0194542	Promoter (11-12kb)	-11056	ENSMUSG00000024073	Birc6	baculoviral IAP repeat-containing 6
Chr12	90251185	90252308	-1.69809	0.0194615	Intron (uc007ojz.1/18191, intron 4 of 7)	59351	ENSMUSG00000066392	Nrxn3	neurexin III
Chr9	89716108	89717107	2.2555	0.0194926	Promoter (18-19kb)	-18942	ENSMUSG00000065596	Mir184	microRNA 184
Chr11	62043990	62044989	2.10434	0.0195143	Promoter (17-18kb)	-17497	ENSMUSG00000018500	Adora2b	adenosine A2b receptor
Chr18	84873484	84875019	-1.85862	0.0195207	Promoter (14-15kb)	-14615	ENSMUSG00000047992	Dipk1c	divergent protein kinase domain 1C
Chr7	46589916	46590915	1.83806	0.01953	Distal Intergenic	-70012	NA	NA	NA
Chr9	78171291	78172468	-1.80151	0.0195368	Promoter (3-4kb)	-3369	ENSMUSG00000038750	Omt2b	oocyte maturation, beta
Chr4	153342178	153343292	-1.66432	0.019544	Exon (uc008wav.2/13368, exon 6 of 7)	5898	ENSMUSG00000029027	Dffb	DNA fragmentation factor, beta subunit
Chr8	65137675	65138847	-1.75542	0.0195807	Distal Intergenic	-291182	NA	NA	NA
Chr17	9368908	9370272	-1.79675	0.0196175	Promoter (8-9kb)	-8021	ENSMUSG00000097049	6530411M01Rik	RIKEN cDNA 6530411M01 gene
Chr7	93180795	93181794	1.66112	0.0196176	Distal Intergenic	-70803	NA	NA	NA
Chr4	101803235	101804559	-1.6766	0.0196316	Intron (uc008twi.1/18578, intron 1 of 6)	42889	ENSMUSG00000028525	Pde4b	phosphodiesterase 4B, cAMP specific
Chr6	78181517	78182859	-1.74007	0.0196905	Distal Intergenic	-138020	NA	NA	NA
Chr4	121870449	121871448	1.58337	0.0196911	Distal Intergenic	-495054	NA	NA	NA
ChrX	18272232	18273699	-2.13809	0.0197065	Distal Intergenic	-233832	NA	NA	NA
Chr18	23863078	23864077	2.43682	0.0197567	Distal Intergenic	-46757	NA	NA	NA
Chr13	84304810	84305963	-1.84656	0.0197899	Distal Intergenic	-55938	NA	NA	NA
Chr5	86797453	86798452	1.98643	0.0198568	Intron (uc008xxp.1/231382, intron 1 of 9)	3960	ENSMUSG00000061259	Tmprss11d	transmembrane protease, serine 11d
Chr13	42501236	42503055	-1.63213	0.0199181	Distal Intergenic	104597	NA	NA	NA
Chr5	33076209	33077208	1.65254	0.0199544	Downstream (1-2kb)	7674	ENSMUSG00000023452	Pisd	phosphatidylserine decarboxylase
Chr2	57115238	57116393	-1.61694	0.0199681	Intron (uc008jse.2/14571, intron 1 of 16)	18468	ENSMUSG00000026827	Gpd2	glycerol phosphate dehydrogenase 2, mitochondrial
Chr14	45208923	45209948	-1.90055	0.0199717	Distal Intergenic	89130	NA	NA	NA
Chr5	63992274	63993401	-1.88539	0.0200325	Distal Intergenic	-46941	NA	NA	NA
Chr14	65534191	65535272	-1.95633	0.0200928	Promoter (18-19kb)	-18228	ENSMUSG00000021972	Hmbox1	homeobox containing 1
Chr4	105121028	105122027	2.1633	0.0201041	Distal Intergenic	291076	NA	NA	NA
Chr4	143911940	143913645	-1.76136	0.0201253	Promoter (6-7kb)	-6507	ENSMUSG00000078508	Gm13128	predicted gene 13128
Chr4	104828457	104829456	2.84244	0.020126	Promoter (<=1kb)	-496	ENSMUSG00000028517	Plpp3	phospholipid phosphatase 3
Chr19	10763718	10765369	-2.07579	0.0201508	Promoter (<=1kb)	413	ENSMUSG00000048832	Vps37c	vacuolar protein sorting 37C
Chr19	42576036	42577695	-1.71064	0.0201675	Promoter (15-16kb)	-15600	ENSMUSG00000025184	R3hcc1l	R3H domain and coiled-coil containing 1 like
Chr12	15704102	15705101	2.49177	0.0201979	Distal Intergenic	118490	NA	NA	NA
Chr5	90012909	90014131	-1.65696	0.0201992	Distal Intergenic	-31330	NA	NA	NA
Chr18	18440453	18441626	-2.30457	0.0202236	Distal Intergenic	-1046462	NA	NA	NA
Chr3	144059268	144060267	2.13246	0.0202308	Distal Intergenic	38316	NA	NA	NA
Chr4	92651378	92652377	2.03582	0.0202433	Distal Intergenic	349825	NA	NA	NA
Chr3	123264821	123266041	-1.70987	0.0202493	Exon (uc008rfo.1/83398, exon 5 of 12)	-53567	ENSMUSG00000104960	Snhg8	small nucleolar RNA host gene 8
Chr3	105800772	105802329	-1.65544	0.0202608	Promoter (2-3kb)	2086	ENSMUSG00000010136	Pifo	primary cilia formation
Chr4	145677490	145678489	2.11239	0.0202742	Exon (uc008vsg.1/uc008vsg.1, exon 3 of 3)	70520	ENSMUSG00000070605	Zfp992	zinc finger protein 992
Chr3	33126292	33127291	2.32494	0.0202829	Distal Intergenic	-84288	NA	NA	NA
Chr4	76393500	76394499	1.96847	0.0203258	Intron (uc008tjp.1/19266, intron 9 of 14)	-153291	ENSMUSG00000028399	Ptprd	protein tyrosine phosphatase, receptor type, D
Chr14	56830447	56832321	-1.63542	0.0203313	Promoter (<=1kb)	-203	ENSMUSG00000015441	Gzmf	granzyme F
Chr3	55720552	55721551	1.83152	0.0203839	Intron (uc008pgu.2/26422, intron 33 of 56)	69525	ENSMUSG00000106572	4933417G07Rik	SEC13 homolog pseudogene
Chr9	119547586	119548585	3.36637	0.0203941	Exon (uc009sbg.2/20264, exon 15 of 27)	-21639	ENSMUSG00000034533	Scn10a	sodium channel, voltage-gated, type X, alpha
Chr4	87260829	87262689	-1.61258	0.0204478	Distal Intergenic	172608	NA	NA	NA
Chr3	24006878	24008547	-2.01381	0.0204679	Distal Intergenic	1857015	NA	NA	NA
Chr7	21800401	21801675	-1.66325	0.0204717	Promoter (2-3kb)	-2927	ENSMUSG00000094010	Vmn1r119	vomeronasal 1 receptor 119
Chr16	82055807	82056806	1.80529	0.0204872	Distal Intergenic	854865	NA	NA	NA
Chr4	111519381	111521026	-2.68675	0.0205317	Distal Intergenic	50348	NA	NA	NA
Chr13	119610381	119612020	-1.84492	0.0205424	Distal Intergenic	106875	NA	NA	NA
Chr11	103740705	103741704	2.43954	0.0205594	Intron (uc007lvt.1/18195, intron 9 of 20)	-49776	ENSMUSG00000034187	Nsf	N-ethylmaleimide sensitive fusion protein
Chr16	52557798	52559019	-1.80099	0.020637	Distal Intergenic	-104688	NA	NA	NA
Chr6	144896600	144898561	-1.64231	0.0206592	Distal Intergenic	98771	NA	NA	NA
Chr11	11696322	11698583	-1.59152	0.020669	Intron (uc007iar.2/60530, intron 3 of 3)	10382	ENSMUSG00000035455	Fignl1	fidgetin-like 1
Chr13	4117664	4119009	-1.85569	0.0206778	Distal Intergenic	30868	NA	NA	NA
Chr15	61283823	61285399	-2.00561	0.02071	Distal Intergenic	-530920	NA	NA	NA
ChrX	25777796	25779173	-1.89106	0.0207236	Intron (uc012hfl.1/100039030, intron 4 of 8)	-40626	ENSMUSG00000083628	Gm2030	predicted gene 2030
Chr15	94665566	94666565	2.58627	0.020733	Intron (uc007xjn.1/320709, intron 3 of 7)	205950	ENSMUSG00000063296	Tmem117	transmembrane protein 117
Chr8	37393085	37394572	-1.68038	0.0207337	Distal Intergenic	-80515	NA	NA	NA
ChrX	56752104	56753794	-1.62102	0.0207476	Intron (uc009thv.1/14168, intron 2 of 3)	84952	ENSMUSG00000031137	Fgf13	fibroblast growth factor 13
Chr13	81867460	81869031	-1.76486	0.0207512	Intron (uc007ria.1/72852, intron 1 of 1)	16931	ENSMUSG00000051098	Mblac2	metallo-beta-lactamase domain containing 2
Chr12	41671578	41672746	-1.76871	0.0207753	Distal Intergenic	-77931	NA	NA	NA
Chr10	57779726	57780725	2.42254	0.0207783	Promoter (5-6kb)	-5489	ENSMUSG00000019920	Lims1	LIM and senescent cell antigen-like domains 1
Chr15	30875299	30876369	-1.86457	0.020793	Intron (uc007vjz.1/18163, intron 17 of 22)	24866	ENSMUSG00000022240	Ctnnd2	catenin (cadherin associated protein), delta 2
Chr13	80651717	80653165	-1.79619	0.0208583	Distal Intergenic	-369518	NA	NA	NA
Chr1	67080130	67081178	-1.82282	0.0208645	Exon (uc007biv.1/14768, exon 3 of 10)	4230	ENSMUSG00000026000	Lancl1	LanC (bacterial lantibiotic synthetase component C)-like 1
Chr15	11817353	11818537	-2.07274	0.0208709	Promoter (2-3kb)	2204	ENSMUSG00000022206	Npr3	natriuretic peptide receptor 3
Chr9	79290769	79292491	-1.58888	0.0208882	Distal Intergenic	195134	NA	NA	NA
Chr13	4985127	4986126	1.66957	0.0208908	Distal Intergenic	-376717	NA	NA	NA
Chr4	122541206	122543048	-1.72434	0.0210161	Exon (uc008uok.2/12331, exon 7 of 13)	20062	ENSMUSG00000028656	Cap1	CAP, adenylate cyclase-associated protein 1 (yeast)
Chr12	89290240	89291239	2.22026	0.0210669	Intron (uc007ojq.1/uc007ojq.1, intron 2 of 2)	97293	ENSMUSG00000096576	Oog1	oogenesin 1
Chr9	41510051	41511050	2.42269	0.0210962	Intron (uc009pan.1/uc009pan.1, intron 2 of 4)	120042	ENSMUSG00000093354	Mir125b-1	microRNA 125b-1
Chr14	4510658	4511657	2.01757	0.0211357	Intron (uc007sbo.1/uc007sbo.1, intron 1 of 2)	383681	ENSMUSG00000096775	Gm5796	predicted gene 5796
Chr19	16522521	16524498	-1.82316	0.0211595	Intron (uc008gwu.2/14675, intron 1 of 6)	12364	ENSMUSG00000024697	Gna14	guanine nucleotide binding protein, alpha 14
Chr2	140440340	140441589	-3.07196	0.0212344	Intron (uc008mpu.1/72899, intron 3 of 3)	55623	ENSMUSG00000051379	Flrt3	fibronectin leucine rich transmembrane protein 3
Chr9	19493810	19495406	-1.74866	0.0212513	Distal Intergenic	-21867	NA	NA	NA
Chr12	95110367	95111751	-1.84531	0.0212543	Distal Intergenic	-1818685	NA	NA	NA
Chr14	85715269	85716268	2.31835	0.0212547	Distal Intergenic	-839038	NA	NA	NA
Chr6	81950888	81951931	1.97763	0.0212618	Distal Intergenic	-34945	NA	NA	NA
Chr10	49753156	49754668	-1.76478	0.0212695	Distal Intergenic	-244596	NA	NA	NA
Chr4	116334491	116336021	-2.0696	0.0212755	Promoter (10-11kb)	-10235	ENSMUSG00000028692	Akr1a1	aldo-keto reductase family 1, member A1 (aldehyde reductase)
Chr1	176124558	176126333	-1.80922	0.0212773	Exon (uc007dsw.2/20739, exon 15 of 52)	21651	ENSMUSG00000026532	Spta1	spectrin alpha, erythrocytic 1
Chr7	84700555	84701693	-2.05476	0.0214096	Distal Intergenic	821015	NA	NA	NA
Chr14	107396760	107398619	-1.95134	0.0214324	Distal Intergenic	891344	NA	NA	NA
ChrX	150257433	150258432	2.57878	0.0214349	Promoter (8-9kb)	-8404	ENSMUSG00000046550	Spin2c	spindlin family, member 2C
Chr1	151426555	151427554	1.99658	0.0214419	Distal Intergenic	380860	NA	NA	NA
Chr10	31658261	31659260	2.01633	0.0214634	Intron (uc007etw.2/432450, intron 4 of 6)	-328730	ENSMUSG00000063760	Rnf217	ring finger protein 217
Chr8	111654214	111655321	1.84515	0.0214857	Intron (uc009nie.1/uc009nie.1, intron 2 of 9)	193454	ENSMUSG00000093241	Mir3108	microRNA 3108
Chr5	121333136	121334247	-1.54755	0.0215388	Intron (uc008zii.1/23960, intron 2 of 6)	3360	ENSMUSG00000066861	Oas1g	2'-5' oligoadenylate synthetase 1G
Chr3	10966711	10968507	1.65258	0.0215568	Distal Intergenic	-526587	NA	NA	NA
Chr11	40923783	40924845	-1.83106	0.0215636	Distal Intergenic	-354995	NA	NA	NA
Chr5	86720543	86722391	-1.46056	0.0215666	Promoter (2-3kb)	-2210	ENSMUSG00000061184	Tmprss11c	transmembrane protease, serine 11c
Chr10	103632348	103633760	1.63485	0.0215978	Distal Intergenic	16940	NA	NA	NA
ChrX	166409438	166410891	-1.52729	0.0216176	Promoter (<=1kb)	0	ENSMUSG00000035299	Mid1	midline 1
Chr14	87748307	87749306	2.58222	0.0216368	Distal Intergenic	-67084	NA	NA	NA
Chr7	21145049	21146233	-1.69679	0.0216382	Promoter (13-14kb)	-13943	ENSMUSG00000096761	Vmn1r245	vomeronasal 1 receptor 245
Chr17	13585413	13586412	2.1385	0.0216728	Distal Intergenic	37231	NA	NA	NA
Chr9	52824242	52826086	-1.71593	0.0216932	Distal Intergenic	230131	NA	NA	NA
Chr7	107138693	107139781	-1.70457	0.0217057	Promoter (9-10kb)	-9725	ENSMUSG00000058761	Rnf169	ring finger protein 169
Chr7	139097481	139099373	-1.95151	0.0217141	Distal Intergenic	-58770	NA	NA	NA
Chr3	27383100	27384099	1.83462	0.0217201	Intron (uc008otq.2/72007, intron 12 of 26)	99818	ENSMUSG00000092695	Mir3092	microRNA 3092
Chr11	120608922	120610781	-1.5077	0.0217202	Promoter (15-16kb)	-15587	ENSMUSG00000025150	Cbr2	carbonyl reductase 2
Chr10	3707525	3708524	2.09495	0.0217427	Distal Intergenic	-119577	NA	NA	NA
Chr16	3446628	3447872	1.9421	0.021772	Distal Intergenic	-144526	NA	NA	NA
ChrX	96252661	96253712	-1.92951	0.0217726	Promoter (12-13kb)	-12439	ENSMUSG00000031216	Stard8	START domain containing 8
Chr1	64695542	64696541	2.38607	0.0217878	Distal Intergenic	-31762	NA	NA	NA
Chr13	61961789	61962922	-1.71244	0.0217925	Distal Intergenic	88849	NA	NA	NA
Chr3	143043807	143044806	2.56245	0.0217945	Distal Intergenic	-498839	NA	NA	NA
Chr16	9102081	9103080	2.23267	0.0217971	Distal Intergenic	251783	NA	NA	NA
Chr9	25232494	25233876	1.58716	0.0218043	Distal Intergenic	-55306	NA	NA	NA
Chr13	72935769	72936768	2.20069	0.0218055	Distal Intergenic	169343	NA	NA	NA
Chr16	32865619	32866673	-1.88797	0.0218078	Promoter (1-2kb)	1779	ENSMUSG00000035629	Rubcn	RUN domain and cysteine-rich domain containing, Beclin 1-interacting protein
Chr10	125954552	125956176	-1.97426	0.0219021	Distal Intergenic	382251	NA	NA	NA
Chr3	96303303	96304302	2.72017	0.0219192	Distal Intergenic	-24806	NA	NA	NA
Chr9	21084668	21086518	-1.57912	0.0219211	Exon (uc012gpc.1/215194, exon 6 of 19)	5895	ENSMUSG00000035047	Kri1	KRI1 homolog
Chr3	150284924	150286088	-1.51727	0.0219359	Distal Intergenic	-814758	NA	NA	NA
Chr7	105722521	105723520	1.74386	0.0219462	Distal Intergenic	15748	NA	NA	NA
Chr14	52320916	52322303	-1.55111	0.0219659	Distal Intergenic	14504	NA	NA	NA
Chr7	128914925	128915924	2.17311	0.0219905	Distal Intergenic	36904	NA	NA	NA
Chr14	84250609	84251608	2.01406	0.022043	Distal Intergenic	-591762	NA	NA	NA
Chr4	57963047	57964358	-1.89169	0.0220451	Exon (uc008syp.1/22166, exon 3 of 5)	4925	ENSMUSG00000028367	Txn1	thioredoxin 1
Chr15	101982959	101983990	-1.63199	0.0220826	Promoter (1-2kb)	1953	ENSMUSG00000023045	Soat2	sterol O-acyltransferase 2
Chr1	132543649	132545239	-2.19139	0.0221735	Exon (uc007cmc.1/12269, exon 5 of 10)	12956	ENSMUSG00000026405	C4bp	complement component 4 binding protein
Chr13	106849456	106850484	-1.9035	0.0221952	Distal Intergenic	615683	NA	NA	NA
Chr13	80317871	80318897	-1.77548	0.0222027	Distal Intergenic	-703786	NA	NA	NA
Chr1	81970580	81971697	-1.62483	0.0222074	Distal Intergenic	316317	NA	NA	NA
Chr6	101258028	101259850	-1.54773	0.0222238	Intron (uc009dcd.2/55983, intron 3 of 9)	68041	ENSMUSG00000035357	Pdzrn3	PDZ domain containing RING finger 3
Chr5	78972867	78973989	-2.02252	0.022237	Distal Intergenic	-1032094	NA	NA	NA
Chr12	24856252	24857365	-2.14391	0.0223046	Distal Intergenic	-326081	NA	NA	NA
Chr8	104374674	104376083	-1.98433	0.022306	Distal Intergenic	932928	NA	NA	NA
Chr8	74745944	74747594	-1.63222	0.0223132	Promoter (2-3kb)	2315	ENSMUSG00000003039	Fam32a	family with sequence similarity 32, member A
Chr4	24548497	24550270	-1.63492	0.0223365	Intron (uc012daz.1/212390, intron 8 of 8)	52306	ENSMUSG00000040387	Klhl32	kelch-like 32
Chr9	50582930	50584642	-1.59259	0.0223588	Promoter (<=1kb)	0	ENSMUSG00000032059	Alg9	asparagine-linked glycosylation 9 (alpha 1,2 mannosyltransferase)
Chr9	63319198	63320197	2.25603	0.0223597	Intron (uc009qbc.1/uc009qbc.1, intron 2 of 4)	-72147	ENSMUSG00000032403	2300009A05Rik	RIKEN cDNA 2300009A05 gene
Chr16	19374851	19375970	-1.64327	0.0224194	Distal Intergenic	32140	NA	NA	NA
Chr18	62673272	62674973	-1.56652	0.0224275	3' UTR	15507	ENSMUSG00000042211	Fbxo38	F-box protein 38
Chr16	75733049	75734048	1.88524	0.0224372	Distal Intergenic	33015	NA	NA	NA
Chr6	22335281	22336523	-1.62351	0.0225269	Distal Intergenic	-29200	NA	NA	NA
Chr7	65426637	65427636	2.16943	0.0225317	Distal Intergenic	-485936	NA	NA	NA
Chr3	4310229	4311228	2.03598	0.0225526	Distal Intergenic	802199	NA	NA	NA
Chr16	67591913	67592925	-1.70558	0.0225605	Intron (uc007zqn.2/239857, intron 1 of 9)	28228	ENSMUSG00000064115	Cadm2	cell adhesion molecule 2
Chr4	137827326	137829158	-1.59562	0.0225641	Intron (uc008vko.2/16559, intron 3 of 13)	9160	ENSMUSG00000028758	Kif17	kinesin family member 17
Chr1	191780062	191781450	-1.77423	0.0226159	Distal Intergenic	-33895	NA	NA	NA
Chr10	20463010	20464009	3.04307	0.0226294	Promoter (18-19kb)	-18136	ENSMUSG00000019990	Pde7b	phosphodiesterase 7B
ChrX	166183802	166184801	1.87625	0.0226299	Intron (uc009uxz.1/17318, intron 1 of 9)	32766	ENSMUSG00000055357	4933400A11Rik	capping protein (actin filament) muscle Z-line, alpha 1 pseudogene
Chr2	17195308	17196307	1.89113	0.0227088	Distal Intergenic	116328	NA	NA	NA
Chr6	100416589	100417588	2.12209	0.0227193	Distal Intergenic	-179237	NA	NA	NA
Chr1	125194363	125195472	-2.08164	0.0227211	Distal Intergenic	746664	NA	NA	NA
Chr16	34299961	34301405	-1.81813	0.0228071	Intron (uc012aew.1/545156, intron 9 of 59)	-36675	ENSMUSG00000061751	Kalrn	kalirin, RhoGEF kinase
ChrX	32075044	32076043	1.70678	0.0228203	Distal Intergenic	-197575	NA	NA	NA
Chr17	75313498	75314566	-1.90403	0.0228304	Distal Intergenic	-90303	NA	NA	NA
Chr5	80315106	80316105	2.12651	0.0228397	Distal Intergenic	-1133491	NA	NA	NA
Chr1	193137348	193138347	1.86789	0.0228505	Intron (uc007ecg.1/66208, intron 1 of 3)	3650	ENSMUSG00000037499	Nenf	neuron derived neurotrophic factor
Chr4	4512659	4513662	-2.1826	0.0228655	Distal Intergenic	206791	NA	NA	NA
Chr1	113225281	113226532	-1.77922	0.0228761	Distal Intergenic	-351332	NA	NA	NA
Chr3	153987238	153988237	1.73449	0.0229742	Exon (uc008rum.1/16875, exon 4 of 9)	5287	ENSMUSG00000096225	Lhx8	LIM homeobox protein 8
Chr18	24613799	24615733	-1.63137	0.0230328	Promoter (13-14kb)	-13639	ENSMUSG00000024273	2700062C07Rik	RIKEN cDNA 2700062C07 gene
Chr3	29637453	29638452	1.80859	0.0230672	Distal Intergenic	258218	NA	NA	NA
Chr15	3473169	3474168	1.62332	0.0230738	Intron (uc007vcb.1/14600, intron 1 of 10)	-51682	ENSMUSG00000055737	Ghr	growth hormone receptor
Chr6	102401627	102403293	-1.67123	0.0230927	Intron (uc009dch.1/18488, intron 1 of 21)	11368	ENSMUSG00000030075	Cntn3	contactin 3
Chr11	49740689	49741688	2.68034	0.0231133	Intron (uc007irj.1/74563, intron 1 of 13)	25352	ENSMUSG00000020374	Rasgef1c	RasGEF domain family, member 1C
Chr14	16718596	16719595	1.71622	0.0231149	Distal Intergenic	356246	NA	NA	NA
Chr7	57940282	57941747	-1.71015	0.0231389	Intron (uc009hby.1/338352, intron 14 of 19)	85722	ENSMUSG00000084234	4933405O20Rik	RIKEN cDNA 4933405O20 gene
ChrX	3990803	3992877	1.49867	0.0231825	Promoter (2-3kb)	2696	ENSMUSG00000094273	Btbd35f17	BTB domain containing 35, family member 17
Chr3	93179844	93180979	-1.76131	0.0232011	Promoter (16-17kb)	-16642	ENSMUSG00000041984	Rptn	repetin
Chr5	86252839	86253838	1.70146	0.0232486	Distal Intergenic	240770	NA	NA	NA
Chr2	173711552	173712551	2.78508	0.0232522	Distal Intergenic	148480	NA	NA	NA
Chr12	10914285	10915284	2.19412	0.0233429	Distal Intergenic	241895	NA	NA	NA
Chr14	83697639	83698638	1.6661	0.023346	Distal Intergenic	-1144732	NA	NA	NA
Chr15	63328124	63329123	1.76075	0.023375	Distal Intergenic	311171	NA	NA	NA
Chr13	11857780	11858779	2.31027	0.0234517	Intron (uc007pld.1/20191, intron 27 of 104)	-63401	ENSMUSG00000021313	Ryr2	ryanodine receptor 2, cardiac
Chr13	48952667	48953666	2.09539	0.0234531	Intron (uc007qin.2/18676, intron 1 of 21)	12588	ENSMUSG00000038025	Phf2	PHD finger protein 2
Chr2	30499175	30500174	2.07762	0.0234707	Distal Intergenic	48611	NA	NA	NA
Chr3	6613697	6616072	-1.48366	0.0235052	3' UTR	4371	ENSMUSG00000069118	1700008P02Rik	RIKEN cDNA 1700008P02 gene
Chr13	75792757	75794386	-1.95768	0.0235393	Distal Intergenic	10263	NA	NA	NA
Chr10	95398834	95399833	2.08644	0.0235732	Promoter (3-4kb)	-3464	ENSMUSG00000036499	Eea1	early endosome antigen 1
Chr11	61594043	61595731	-1.62131	0.0235738	Promoter (18-19kb)	-18453	ENSMUSG00000020528	Prpsap2	phosphoribosyl pyrophosphate synthetase-associated protein 2
Chr13	88997339	88999233	-1.93938	0.0235836	Intron (uc007riz.2/13612, intron 1 of 2)	36262	ENSMUSG00000034488	Edil3	EGF-like repeats and discoidin I-like domains 3
Chr12	48838243	48839492	-1.95435	0.0236104	Distal Intergenic	-918481	NA	NA	NA
Chr7	24936827	24937826	2.07651	0.0236105	Distal Intergenic	17645	NA	NA	NA
Chr5	58270501	58271624	-1.92848	0.023657	Intron (uc008xlu.2/54216, intron 1 of 2)	-159061	ENSMUSG00000097216	4932441J04Rik	RIKEN cDNA 4932441J04 gene
Chr8	101097945	101098944	2.09008	0.0236845	Distal Intergenic	704657	NA	NA	NA
Chr1	69269532	69270557	-2.17038	0.0236847	Distal Intergenic	-114899	NA	NA	NA
Chr5	92588827	92590121	-1.67408	0.0237234	Intron (uc008ycl.1/56041, intron 4 of 12)	21863	ENSMUSG00000029407	Uso1	USO1 vesicle docking factor
Chr7	151721407	151722664	-1.58365	0.0237257	Intron (uc012fxz.1/233977, intron 2 of 31)	16970	ENSMUSG00000037519	Ppfia1	protein tyrosine phosphatase, receptor type, f polypeptide (PTPRF), interacting protein (liprin), alpha 1
Chr14	103442422	103443528	-1.78318	0.0237338	Promoter (2-3kb)	-2701	ENSMUSG00000022126	Acod1	aconitate decarboxylase 1
Chr3	102953712	102954711	2.72744	0.0237366	Promoter (<=1kb)	748	ENSMUSG00000007379	Dennd2c	DENN/MADD domain containing 2C
Chr8	4531522	4532521	1.91724	0.0237459	Distal Intergenic	38117	NA	NA	NA
Chr7	138028101	138030228	-1.62499	0.0237875	Exon (uc009kaq.1/101476, exon 4 of 5)	18677	ENSMUSG00000040268	Plekha1	pleckstrin homology domain containing, family A (phosphoinositide binding specific) member 1
Chr18	77753028	77754451	-1.917	0.0237942	Promoter (9-10kb)	-9177	ENSMUSG00000025427	Rnf165	ring finger protein 165
Chr4	143184402	143185596	-1.73393	0.0238423	Promoter (19-20kb)	-19310	ENSMUSG00000066688	Gm13083	predicted gene 13083
Chr9	20904299	20905508	-1.65602	0.0238465	Promoter (7-8kb)	-7867	ENSMUSG00000010205	Raver1	ribonucleoprotein, PTB-binding 1
Chr3	88187983	88188982	2.48739	0.0239112	Promoter (<=1kb)	0	ENSMUSG00000074483	Bglap	bone gamma carboxyglutamate protein
Chr6	3134567	3135704	1.5423	0.0239136	Distal Intergenic	-102815	NA	NA	NA
Chr4	12145195	12146194	1.94086	0.0239234	Distal Intergenic	-46033	NA	NA	NA
Chr11	27474918	27476828	-1.5323	0.0239284	Distal Intergenic	789810	NA	NA	NA
Chr18	42494755	42495754	2.35818	0.0239508	Intron (uc008etr.2/225432, intron 18 of 19)	33378	ENSMUSG00000024491	Rbm27	RNA binding motif protein 27
Chr5	135667932	135668931	2.40275	0.0239914	Intron (uc008zxz.2/22385, intron 1 of 18)	4739	ENSMUSG00000002748	Baz1b	bromodomain adjacent to zinc finger domain, 1B
Chr1	85151157	85152156	1.64124	0.0239934	Intron (uc007btf.1/381287, intron 1 of 3)	-23203	ENSMUSG00000079457	Gm7609	predicted pseudogene 7609
Chr9	120637112	120638111	1.72853	0.0239953	Distal Intergenic	156478	NA	NA	NA
Chr8	59975518	59977985	-1.42154	0.0240072	Promoter (8-9kb)	-8861	ENSMUSG00000031609	Sap30	sin3 associated polypeptide
Chr2	45218134	45219133	2.5893	0.0240254	Distal Intergenic	-245219	NA	NA	NA
Chr1	48780631	48781630	2.21168	0.0240328	Distal Intergenic	-1870277	NA	NA	NA
Chr3	69308079	69309107	-2.11623	0.0241053	Intron (uc008pmg.1/242083, intron 2 of 3)	-49286	ENSMUSG00000027784	Ppm1l	protein phosphatase 1 (formerly 2C)-like
Chr7	16636118	16637117	2.07503	0.0241262	Distal Intergenic	-20174	NA	NA	NA
Chr5	122504044	122505043	2.31336	0.0242195	Promoter (6-7kb)	-6210	ENSMUSG00000042589	Cux2	cut-like homeobox 2
Chr9	112500566	112502090	-1.66521	0.0242461	Distal Intergenic	341488	NA	NA	NA
Chr1	173493176	173494175	2.31284	0.0242491	Intron (uc007dor.1/18106, intron 1 of 4)	3852	ENSMUSG00000004709	Cd244a	CD244 molecule A
Chr19	11291033	11292533	-1.53238	0.0242637	Promoter (19-20kb)	-19820	ENSMUSG00000057240	Ms4a13	membrane-spanning 4-domains, subfamily A, member 13
Chr11	11269461	11270909	-1.47493	0.024269	Intron (uc007iae.2/53604, intron 6 of 7)	91513	ENSMUSG00000020193	Zpbp	zona pellucida binding protein
Chr12	97470802	97471966	-1.68974	0.024272	Distal Intergenic	-185370	NA	NA	NA
Chr5	99362656	99363655	2.36903	0.0242806	Exon (uc008ygi.2/19092, exon 3 of 4)	9167	ENSMUSG00000029334	Prkg2	protein kinase, cGMP-dependent, type II
Chr1	70810271	70812067	-1.45083	0.0242912	Intron (uc007bjk.1/320460, intron 3 of 3)	34998	ENSMUSG00000045648	Vwc2l	von Willebrand factor C domain-containing protein 2-like
Chr13	43486058	43487057	1.87975	0.0242951	Promoter (6-7kb)	-6688	ENSMUSG00000063200	Nol7	nucleolar protein 7
Chr3	144900345	144901962	-1.71332	0.0243867	Distal Intergenic	-53474	NA	NA	NA
Chr9	86314122	86315292	-1.75577	0.0244117	Intron (uc009qxc.1/70348, intron 8 of 9)	43231	ENSMUSG00000032415	Ube2cbp	ubiquitin-conjugating enzyme E2C binding protein
Chr19	39804167	39805166	2.18185	0.02446	Intron (uc012bll.1/433247, intron 4 of 7)	8862	ENSMUSG00000074882	Cyp2c68	cytochrome P450, family 2, subfamily c, polypeptide 68
Chr16	68470903	68472638	-2.08855	0.0244621	Distal Intergenic	-849750	NA	NA	NA
Chr5	107612827	107614309	-1.8542	0.0244696	Intron (uc008ylz.2/21814, intron 3 of 16)	104305	ENSMUSG00000029287	Tgfbr3	transforming growth factor, beta receptor III
Chr3	112945037	112946635	-1.75742	0.0244885	Distal Intergenic	13010	NA	NA	NA
Chr8	83618807	83620108	-1.48788	0.0245705	Distal Intergenic	-80002	NA	NA	NA
Chr9	59720290	59721391	-2.04266	0.0245883	Intron (uc009pyq.2/270163, intron 25 of 43)	-20557	ENSMUSG00000039585	Myo9a	myosin IXa
Chr17	4061061	4062060	2.57723	0.0246062	Distal Intergenic	-364800	NA	NA	NA
Chr3	82524381	82526131	-1.66522	0.0246349	Distal Intergenic	154274	NA	NA	NA
Chr2	17395895	17397015	-1.53445	0.0246746	Promoter (11-12kb)	-11479	ENSMUSG00000053702	Nebl	nebulette
Chr7	64072740	64073901	-1.74831	0.0247029	Intron (uc009hdz.1/14407, intron 5 of 9)	568340	ENSMUSG00000055026	Gabrg3	gamma-aminobutyric acid (GABA) A receptor, subunit gamma 3
Chr4	136064877	136065876	1.53985	0.0247202	Intron (uc008vie.1/269593, intron 1 of 2)	-30395	ENSMUSG00000001089	Luzp1	leucine zipper protein 1
Chr16	90370859	90371881	-1.62467	0.024753	Promoter (14-15kb)	-14761	ENSMUSG00000053414	Hunk	hormonally upregulated Neu-associated kinase
Chr1	107200151	107201162	-2.64147	0.024756	Intron (uc011wpy.1/320311, intron 2 of 2)	52125	ENSMUSG00000047496	Rnf152	ring finger protein 152
Chr2	83040167	83041209	-1.73755	0.0247805	Distal Intergenic	-443526	NA	NA	NA
Chr8	46303872	46305323	-1.8966	0.0247812	Distal Intergenic	42062	NA	NA	NA
Chr6	58994047	58995325	-1.81775	0.0247917	Promoter (19-20kb)	-19551	ENSMUSG00000037709	Fam13a	family with sequence similarity 13, member A
Chr12	35780180	35781502	-1.77904	0.0247958	Intron (uc011yli.1/217463, intron 7 of 17)	9569	ENSMUSG00000020590	Snx13	sorting nexin 13
Chr16	6935430	6936429	2.09871	0.0248519	Intron (uc007ycb.2/268859, intron 4 of 15)	-133499	ENSMUSG00000008658	Rbfox1	RNA binding protein, fox-1 homolog (C. elegans) 1
Chr3	12993324	12994344	-1.82309	0.0249076	Distal Intergenic	-477311	NA	NA	NA
Chr16	37206395	37207431	-1.90603	0.0249425	Intron (uc007zds.2/207227, intron 16 of 27)	120388	ENSMUSG00000034206	Polq	polymerase (DNA directed), theta
Chr1	98130771	98132720	-1.53798	0.0249567	Distal Intergenic	-566600	NA	NA	NA
Chr12	35833904	35835695	-1.74066	0.0249706	Distal Intergenic	43874	NA	NA	NA
Chr4	97764842	97766110	-1.57123	0.0249955	Intron (uc008tty.2/18027, intron 10 of 10)	187118	ENSMUSG00000028565	Nfia	nuclear factor I/A
Chr1	148056279	148057800	-1.70937	0.0250075	Distal Intergenic	-284996	NA	NA	NA
Chr16	4969204	4970203	2.41151	0.0250331	Promoter (4-5kb)	-4874	ENSMUSG00000022515	Anks3	ankyrin repeat and sterile alpha motif domain containing 3
Chr6	107121828	107123145	-1.95962	0.0250689	Distal Intergenic	-356634	NA	NA	NA
Chr8	22860471	22861606	-1.53153	0.0250879	Distal Intergenic	15505	NA	NA	NA
Chr15	58252354	58253882	-1.78583	0.0251908	Exon (uc007vtn.2/210998, exon 3 of 24)	5331	ENSMUSG00000037119	Fam91a1	family with sequence similarity 91, member A1
ChrX	4601652	4602651	1.99636	0.0251917	Distal Intergenic	155125	NA	NA	NA
Chr18	51555942	51556941	2.15596	0.0251942	Intron (uc008exa.1/71373, intron 2 of 2)	278390	ENSMUSG00000073565	Prr16	proline rich 16
ChrX	28035957	28037707	-1.56407	0.0252711	Distal Intergenic	-123816	NA	NA	NA
ChrX	28481988	28482987	2.01249	0.0253092	Distal Intergenic	-223047	NA	NA	NA
Chr9	74865645	74866644	2.22541	0.0253122	Promoter (6-7kb)	-6798	ENSMUSG00000034858	Fam214a	family with sequence similarity 214, member A
Chr6	96431806	96433076	-2.04045	0.0253276	Intron (uc009dae.1/320265, intron 2 of 4)	-315607	ENSMUSG00000072878	1700123L14Rik	nucleoporin 50 pseudogene
Chr9	72600668	72602390	-1.65285	0.0253493	Distal Intergenic	-52691	NA	NA	NA
Chr1	25987958	25989555	-1.92716	0.0253533	Distal Intergenic	-101406	NA	NA	NA
Chr3	12952018	12953810	-1.65486	0.0253571	Distal Intergenic	-517845	NA	NA	NA
Chr15	45291111	45292110	1.75205	0.0253869	Distal Intergenic	-344631	NA	NA	NA
Chr1	4422121	4423507	-1.73364	0.0253982	Distal Intergenic	-22799	NA	NA	NA
Chr2	113171046	113172293	-1.61889	0.0254006	Intron (uc008lpk.1/14260, intron 1 of 3)	3153	ENSMUSG00000044042	Fmn1	formin 1
Chr10	57345676	57346854	-1.86083	0.0254042	Promoter (4-5kb)	-4933	ENSMUSG00000019876	Pkib	protein kinase inhibitor beta, cAMP dependent, testis specific
ChrX	39076761	39077760	1.7589	0.0254099	Distal Intergenic	90045	NA	NA	NA
Chr8	45137444	45138639	-1.76188	0.0254311	Distal Intergenic	-352599	NA	NA	NA
Chr7	24887837	24889528	-1.54386	0.0254367	Promoter (7-8kb)	-7811	ENSMUSG00000052675	Zfp112	zinc finger protein 112
Chr12	116964284	116965912	-1.47252	0.0256201	Intron (uc011yvj.1/uc011yvj.1, intron 30 of 711)	-320023	ENSMUSG00000042063	Zfp386	zinc finger protein 386 (Kruppel-like)
Chr17	76450824	76451823	2.12052	0.0256381	Distal Intergenic	190461	NA	NA	NA
Chr9	82638514	82639513	2.13376	0.0256438	Distal Intergenic	-83900	NA	NA	NA
Chr13	50176846	50178424	-2.10504	0.0256503	Distal Intergenic	167253	NA	NA	NA
Chr11	57922361	57924312	-1.49493	0.0256535	5' UTR	4630	ENSMUSG00000020515	Cnot8	CCR4-NOT transcription complex, subunit 8
Chr6	34657450	34658779	2.88659	0.0256575	Promoter-(<=1kb)	-665	ENSMUSG00000029761	Cald1	caldesmon 1
Chr5	95463007	95464006	2.03448	0.0257086	Distal Intergenic	-78631	NA	NA	NA
Chr10	45046456	45047455	2.38282	0.02573	Promoter (8-9kb)	-8113	ENSMUSG00000071317	Bves	blood vessel epicardial substance
Chr7	92090073	92091870	-1.9084	0.0257427	Exon (uc012fog.1/100009609, exon 5 of 6)	20649	ENSMUSG00000066372	Vmn2r65	vomeronasal 2, receptor 65
Chr19	3067226	3069015	1.50405	0.0257504	Exon (uc008fvx.1/uc008fvx.1, exon 6 of 6)	213995	ENSMUSG00000024831	Ighmbp2	immunoglobulin mu binding protein 2
Chr7	132528195	132529194	2.09568	0.0257505	Distal Intergenic	15820	NA	NA	NA
Chr7	22085366	22086819	-1.87794	0.0257678	Promoter (<=1kb)	0	ENSMUSG00000096813	Vmn1r126	vomeronasal 1 receptor 126
Chr8	31816855	31817921	-1.79001	0.0258152	Distal Intergenic	-382213	NA	NA	NA
Chr1	16881818	16882817	1.69972	0.0258388	Distal Intergenic	203281	NA	NA	NA
Chr7	130249356	130251834	-1.40219	0.025859	Promoter (15-16kb)	-15565	ENSMUSG00000052707	Tnrc6a	trinucleotide repeat containing 6a
Chr3	5087808	5089548	-1.56373	0.0258796	Distal Intergenic	-129006	NA	NA	NA
Chr6	52358209	52359394	-1.82917	0.0258916	Distal Intergenic	94717	NA	NA	NA
Chr9	42821676	42823019	-1.66797	0.0259243	Intron (uc009pba.1/69632, intron 11 of 40)	-69222	ENSMUSG00000032017	Grik4	glutamate receptor, ionotropic, kainate 4
Chr16	13459468	13460467	2.37107	0.025967	Distal Intergenic	5535	NA	NA	NA
Chr12	91451274	91452587	-1.50313	0.0260473	Intron (uc007oka.1/18191, intron 16 of 18)	400351	ENSMUSG00000066392	Nrxn3	neurexin III
Chr3	108677536	108679252	-1.67699	0.0260743	Intron (uc008qzv.2/320181, intron 5 of 12)	5445	ENSMUSG00000045326	Fndc7	fibronectin type III domain containing 7
Chr14	29830001	29831210	-1.51757	0.0260981	Promoter (<=1kb)	-184	ENSMUSG00000045776	Lrtm1	leucine-rich repeats and transmembrane domains 1
Chr9	15553113	15554322	-1.82362	0.0261056	Distal Intergenic	38900	NA	NA	NA
Chr13	76634390	76636252	-1.75163	0.0261332	Intron (uc007rgn.1/78771, intron 1 of 20)	-82683	ENSMUSG00000021596	Mctp1	multiple C2 domains, transmembrane 1
Chr15	38127768	38129664	-1.80731	0.026141	Promoter (19-20kb)	-19294	ENSMUSG00000061923	Odf1	outer dense fiber of sperm tails 1
Chr7	58652354	58653353	2.31885	0.0261686	Distal Intergenic	-113046	NA	NA	NA
Chr7	24135642	24136732	-1.79499	0.0261762	Intron (uc009fod.2/446099, intron 6 of 8)	-34184	ENSMUSG00000015721	Nlrp5	NLR family, pyrin domain containing 5
Chr3	136745127	136746542	-1.66627	0.0261931	Distal Intergenic	179111	NA	NA	NA
Chr5	94216741	94217740	1.80085	0.0262198	Distal Intergenic	-116252	NA	NA	NA
Chr4	82434028	82435027	2.08712	0.0263469	Distal Intergenic	70538	NA	NA	NA
Chr3	18881328	18883320	-1.51962	0.0263736	Distal Intergenic	179745	NA	NA	NA
Chr1	117453994	117455598	-1.60908	0.0263957	Distal Intergenic	-126116	NA	NA	NA
Chr9	78669046	78670211	-2.03326	0.0264743	Distal Intergenic	205693	NA	NA	NA
Chr3	99045158	99046157	2.22245	0.0264767	Promoter (11-12kb)	-11526	ENSMUSG00000027868	Tbx15	T-box 15
Chr4	74800998	74802009	-2.1429	0.0265042	Distal Intergenic	122181	NA	NA	NA
Chr1	97124021	97125102	-1.94485	0.0265452	Distal Intergenic	-85103	NA	NA	NA
Chr10	120241508	120242919	-1.72217	0.0265475	Intron (uc007hfh.2/320183, intron 5 of 6)	93108	ENSMUSG00000051236	Msrb3	methionine sulfoxide reductase B3
Chr11	102141896	102142931	-1.51968	0.0265621	Promoter (3-4kb)	-3344	ENSMUSG00000034757	Tmub2	transmembrane and ubiquitin-like domain containing 2
Chr17	29422711	29423721	-1.86329	0.0265985	Intron (uc008bsn.2/80748, intron 4 of 8)	16978	ENSMUSG00000052712	BC004004	cDNA sequence BC004004
Chr16	91175596	91176595	2.50073	0.0266285	Distal Intergenic	-49200	NA	NA	NA
Chr7	55983206	55984205	1.80492	0.0266535	Distal Intergenic	-60168	NA	NA	NA
Chr5	119340832	119342111	-1.52441	0.0266748	Distal Intergenic	141214	NA	NA	NA
Chr9	111434339	111436103	-1.77192	0.0267361	Distal Intergenic	92754	NA	NA	NA
Chr12	98974367	98975576	-1.66017	0.026778	Distal Intergenic	521971	NA	NA	NA
Chr14	43427183	43429004	-1.44419	0.026785	Distal Intergenic	597340	NA	NA	NA
Chr14	4441828	4442922	-1.74395	0.0267937	5' UTR	314851	ENSMUSG00000096775	Gm5796	predicted gene 5796
Chr11	77593954	77594953	2.31959	0.0268363	Intron (uc007khg.1/360013, intron 1 of 39)	3187	ENSMUSG00000000631	Myo18a	myosin XVIIIA
Chr2	178085031	178086290	-1.81849	0.0268721	Exon (uc012clt.1/320558, exon 14 of 21)	23459	ENSMUSG00000060445	Sycp2	synaptonemal complex protein 2
Chr13	23010029	23011199	-1.61084	0.0268796	Distal Intergenic	-33999	NA	NA	NA
Chr5	22347384	22348383	2.42211	0.0268868	Intron (uc008wpv.2/269629, intron 1 of 2)	-94682	ENSMUSG00000105076	A930003O13Rik	RIKEN cDNA A930003O13 gene
Chr16	3354224	3356080	1.3841	0.0268982	Distal Intergenic	-236318	NA	NA	NA
Chr8	11954119	11955376	-1.91541	0.0269037	Distal Intergenic	113598	NA	NA	NA
Chr8	73422045	73423225	-1.90084	0.0269046	Promoter (<=1kb)	-703	ENSMUSG00000045128	Rpl18a	ribosomal protein L18A
ChrX	3095335	3096345	-1.41234	0.0269206	Distal Intergenic	147284	NA	NA	NA
Chr17	41515775	41517134	-1.45285	0.0269491	Distal Intergenic	444141	NA	NA	NA
Chr11	97323452	97324503	-1.59915	0.0269843	Intron (uc007lec.1/58996, intron 6 of 18)	11978	ENSMUSG00000049807	Arhgap23	Rho GTPase activating protein 23
Chr1	163883297	163884417	-1.77821	0.0269941	Promoter (14-15kb)	-14902	ENSMUSG00000026698	Pigc	phosphatidylinositol glycan anchor biosynthesis, class C
Chr17	10003400	10004607	-1.94929	0.0270705	Distal Intergenic	-140831	NA	NA	NA
Chr4	91922704	91924442	-1.4629	0.0270762	Distal Intergenic	-108779	NA	NA	NA
Chr18	72100919	72102693	-1.38174	0.0271202	Intron (uc008fop.1/13176, intron 2 of 28)	408030	ENSMUSG00000060534	Dcc	deleted in colorectal carcinoma
Chr4	145701255	145702254	1.46871	0.0271709	Intron (uc008vse.1/433791, intron 3 of 3)	46755	ENSMUSG00000070605	Zfp992	zinc finger protein 992
Chr13	41089058	41090616	-1.54783	0.0271741	Promoter (5-6kb)	-5763	ENSMUSG00000038683	Pak1ip1	PAK1 interacting protein 1
Chr8	110021890	110023207	-1.68071	0.0271858	Intron (uc009nht.1/66894, intron 5 of 6)	14658	ENSMUSG00000031930	Wwp2	WW domain containing E3 ubiquitin protein ligase 2
Chr17	83380357	83381719	-1.56213	0.0272245	Distal Intergenic	-232904	NA	NA	NA
Chr5	69118278	69119879	-1.67746	0.0272291	Distal Intergenic	613069	NA	NA	NA
Chr1	92793015	92794014	2.11407	0.0272969	Promoter (17-18kb)	-17663	ENSMUSG00000026303	Mlph	melanophilin
Chr8	37461333	37462840	-1.55779	0.0273159	Distal Intergenic	-57762	NA	NA	NA
Chr19	23720809	23722039	-1.68853	0.0273187	Intron (uc008had.1/67483, intron 1 of 5)	5263	ENSMUSG00000033053	1700028P14Rik	RIKEN cDNA 1700028P14 gene
Chr15	6461033	6462269	-2.24363	0.027355	Distal Intergenic	65700	NA	NA	NA
Chr6	77592536	77594165	-1.81162	0.02738	Intron (uc009cjq.2/12386, intron 5 of 19)	335496	ENSMUSG00000063063	Ctnna2	catenin (cadherin associated protein), alpha 2
Chr12	120791051	120792050	1.7616	0.0273803	Distal Intergenic	109168	NA	NA	NA
ChrX	158768409	158770321	-1.71611	0.0273868	Distal Intergenic	-170687	NA	NA	NA
Chr2	117674093	117675786	-1.61558	0.0273889	Intron (uc008lro.1/uc008lro.1, intron 2 of 5)	-261872	ENSMUSG00000040152	Thbs1	thrombospondin 1
Chr10	108196098	108197325	-1.82271	0.0273941	Intron (uc007gzg.1/20979, intron 3 of 10)	-58882	ENSMUSG00000112039	Gm5136	predicted gene 5136
Chr2	75475935	75477483	-1.6306	0.0274107	Promoter (19-20kb)	-19833	ENSMUSG00000059005	Hnrnpa3	heterogeneous nuclear ribonucleoprotein A3
Chr1	135528577	135530342	-1.734	0.0274431	Exon (uc011wsb.1/70579, exon 8 of 14)	12081	ENSMUSG00000102976	Zc3h11a	zinc finger CCCH type containing 11A
Chr6	146623418	146624616	-1.8885	0.0274476	Distal Intergenic	-27094	NA	NA	NA
Chr16	12343296	12344295	1.59868	0.0275126	Distal Intergenic	359090	NA	NA	NA
Chr15	78230681	78232270	-1.75076	0.0275435	Intron (uc007wpd.1/22117, intron 1 of 1)	4019	ENSMUSG00000044986	Tst	thiosulfate sulfurtransferase, mitochondrial
Chr9	102008317	102009316	1.73831	0.0275835	Intron (uc009rfn.2/270190, intron 3 of 15)	247707	ENSMUSG00000032537	Ephb1	Eph receptor B1
ChrX	106881879	106883214	-1.62465	0.0275876	Distal Intergenic	489784	NA	NA	NA
ChrX	106301405	106303051	-1.53702	0.0276632	Intron (uc009uct.1/56726, intron 1 of 3)	10659	ENSMUSG00000031246	Sh3bgrl	SH3-binding domain glutamic acid-rich protein like
ChrX	67817533	67818532	2.20903	0.0277284	Distal Intergenic	18800	NA	NA	NA
Chr16	12498246	12500088	-1.69925	0.027746	Distal Intergenic	514040	NA	NA	NA
Chr2	102238150	102239149	2.49726	0.0277569	Promoter (1-2kb)	1908	ENSMUSG00000027189	Trim44	tripartite motif-containing 44
ChrX	120719249	120720517	-1.8379	0.0277622	Distal Intergenic	502081	NA	NA	NA
Chr16	14459941	14461893	-2.54776	0.0277784	Promoter (<=1kb)	0	ENSMUSG00000023088	Abcc1	ATP-binding cassette, sub-family C (CFTR/MRP), member 1
Chr10	63811891	63813462	-1.70258	0.0278195	Intron (uc007fkh.2/216033, intron 9 of 17)	-258888	ENSMUSG00000042846	Lrrtm3	leucine rich repeat transmembrane neuronal 3
Chr10	115723477	115724476	2.17754	0.0278876	Intron (uc007hbu.1/19263, intron 3 of 7)	10898	ENSMUSG00000020154	Ptprb	protein tyrosine phosphatase, receptor type, B
Chr17	64363055	64364334	-1.69447	0.027928	Intron (uc008dfn.1/14158, intron 12 of 14)	75734	ENSMUSG00000000127	Fer	fer (fms/fps related) protein kinase
Chr5	72118950	72120056	-1.53984	0.0279454	Intron (uc008xrb.1/14400, intron 3 of 8)	27695	ENSMUSG00000029212	Gabrb1	gamma-aminobutyric acid (GABA) A receptor, subunit beta 1
Chr5	31742556	31743630	-2.37999	0.0279486	Promoter (11-12kb)	-11179	ENSMUSG00000062761	Zfp512	zinc finger protein 512
Chr3	97924603	97925602	2.1469	0.027952	Exon (uc008qpo.1/18129, exon 18 of 34)	-39133	ENSMUSG00000043468	Adam30	a disintegrin and metallopeptidase domain 30
Chr1	135490911	135492209	1.51027	0.0279815	Distal Intergenic	14648	NA	NA	NA
Chr6	78225594	78226593	2.42927	0.027989	Distal Intergenic	-94286	NA	NA	NA
Chr7	71053687	71054828	-1.49346	0.0280011	Intron (uc009hfm.2/50794, intron 1 of 1)	14928	ENSMUSG00000052040	Klf13	Kruppel-like factor 13
Chr17	68179776	68181301	-1.54995	0.0280122	Distal Intergenic	118979	NA	NA	NA
Chr13	10546181	10547912	-1.80924	0.0280269	Distal Intergenic	-186132	NA	NA	NA
Chr3	89933913	89935113	-1.60035	0.0280482	Intron (uc008qbk.2/77595, intron 8 of 16)	25859	ENSMUSG00000027939	Nup210l	nucleoporin 210-like
Chr10	122303245	122304559	-1.49988	0.0280926	Intron (uc007hgf.2/319468, intron 5 of 5)	118221	ENSMUSG00000065406	Mirlet7i	microRNA let7i
Chr1	85044989	85046897	-1.55171	0.0281349	Intron (uc007btf.1/381287, intron 1 of 3)	59531	ENSMUSG00000089844	A530032D15Rik	RIKEN cDNA A530032D15Rik gene
Chr2	65530341	65531846	-1.69978	0.0281715	Intron (uc008jwo.2/110876, intron 10 of 25)	21839	ENSMUSG00000075318	Scn2a	sodium channel, voltage-gated, type II, alpha
Chr9	18932087	18933086	2.19341	0.0282444	Distal Intergenic	6686	NA	NA	NA
ChrX	128648824	128650446	-1.85727	0.0282451	Distal Intergenic	1573086	NA	NA	NA
Chr19	41318646	41320263	-2.03017	0.0282631	Exon (uc008hls.1/107358, exon 5 of 15)	18231	ENSMUSG00000025016	Tm9sf3	transmembrane 9 superfamily member 3
Chr3	109953079	109955129	-1.57309	0.0282785	Promoter (6-7kb)	-6150	ENSMUSG00000059857	Ntng1	netrin G1
Chr5	144727328	144728327	1.52908	0.0283118	Distal Intergenic	36055	NA	NA	NA
Chr16	57933539	57934779	-1.64925	0.0283476	Distal Intergenic	-178689	NA	NA	NA
Chr2	93495343	93496342	2.32588	0.0283706	Intron (uc008lgd.2/11695, intron 1 of 2)	12752	ENSMUSG00000040310	Alx4	aristaless-like homeobox 4
Chr6	59052691	59054197	-1.6743	0.0283796	Distal Intergenic	-78195	NA	NA	NA
Chr8	114516909	114517908	1.71904	0.0283926	Promoter (<=1kb)	-707	ENSMUSG00000031949	Adat1	adenosine deaminase, tRNA-specific 1
Chr7	104569145	104570505	-1.6596	0.0284274	Promoter (3-4kb)	-3125	ENSMUSG00000035686	Thrsp	thyroid hormone responsive
ChrX	121317291	121318290	2.17865	0.0284403	Distal Intergenic	-67772	NA	NA	NA
Chr9	38134668	38135973	-1.6925	0.0284481	Promoter (1-2kb)	-1104	ENSMUSG00000058270	Olfr25	olfactory receptor 25
ChrX	28915444	28917772	-1.57693	0.0284568	Distal Intergenic	-212750	NA	NA	NA
Chr7	14505373	14506388	-1.59927	0.0284622	Intron (uc012ezr.1/434121, intron 4 of 5)	68549	ENSMUSG00000074377	Sult2a4	sulfotransferase family 2A, dehydroepiandrosterone (DHEA)-preferring, member 4
Chr5	53011810	53012824	2.01844	0.02853	Distal Intergenic	48116	NA	NA	NA
Chr1	154314413	154315559	-1.73457	0.0285338	Intron (uc007czg.2/269132, intron 1 of 11)	67416	ENSMUSG00000032649	Colgalt2	collagen beta(1-O)galactosyltransferase 2
Chr7	73791858	73792946	-1.66772	0.0285746	3' UTR	40860	ENSMUSG00000030509	Asb7	ankyrin repeat and SOCS box-containing 7
Chr4	51092898	51094634	-1.63154	0.0285764	Distal Intergenic	-134916	NA	NA	NA
Chr14	105474357	105475356	2.0762	0.0285779	Distal Intergenic	38537	NA	NA	NA
Chr17	76554406	76555909	-1.5147	0.0286126	Distal Intergenic	294043	NA	NA	NA
Chr14	63726919	63727918	1.95412	0.0286813	Promoter (13-14kb)	-13384	ENSMUSG00000021939	Ctsb	cathepsin B
Chr13	65476050	65477260	-1.74454	0.0287149	Distal Intergenic	95888	NA	NA	NA
Chr10	120953193	120954941	-1.4451	0.0287369	Distal Intergenic	-39887	NA	NA	NA
Chr13	97692623	97693622	1.90342	0.0287445	Promoter (1-2kb)	-1022	ENSMUSG00000091387	Gcnt4	glucosaminyl (N-acetyl) transferase 4, core 2 (beta-1,6-N-acetylglucosaminyltransferase)
Chr17	13123507	13124566	-1.981	0.0287506	Intron (uc008alo.1/224530, intron 3 of 8)	7784	NA	Snora20	small nucleolar RNA, H/ACA box 20
Chr4	105698116	105699292	-1.73235	0.0287937	Distal Intergenic	-289526	NA	NA	NA
Chr8	122684282	122685356	-1.85633	0.0287997	3' UTR	15453	ENSMUSG00000031824	6430548M08Rik	RIKEN cDNA 6430548M08 gene
Chr7	12713701	12715379	-1.9161	0.0288023	Distal Intergenic	-22434	NA	NA	NA
Chr10	98817471	98818470	2.3213	0.0288324	Exon (uc007gxl.1/uc007gxl.1, exon 4 of 4)	91606	ENSMUSG00000019960	Dusp6	dual specificity phosphatase 6
Chr12	95509627	95510626	1.60451	0.0288371	Distal Intergenic	-1419810	NA	NA	NA
Chr14	99675729	99677048	-1.86775	0.0289701	Distal Intergenic	-20862	NA	NA	NA
Chr10	39749789	39751224	3.19453	0.0289882	Downstream-(2-3kb)	-4715	ENSMUSG00000038522	Mfsd4b1	major facilitator superfamily domain containing 4B1
Chr1	186852277	186853840	-1.70363	0.0290069	Distal Intergenic	-28849	NA	NA	NA
Chr7	11636173	11637701	-2.44202	0.0290284	Distal Intergenic	45079	NA	NA	NA
Chr9	75970578	75971609	-1.5555	0.0291352	Intron (uc009qsx.1/208982, intron 7 of 8)	89855	ENSMUSG00000059383	Gfral	GDNF family receptor alpha like
Chr1	48609070	48610069	1.50822	0.02915	Distal Intergenic	-1698716	NA	NA	NA
Chr9	87889228	87890227	1.83133	0.0291947	Distal Intergenic	-263133	NA	NA	NA
Chr16	63643705	63644704	2.09596	0.0292239	Intron (uc007zpy.1/13837, intron 5 of 16)	219279	ENSMUSG00000052504	Epha3	Eph receptor A3
Chr3	148334478	148335477	2.12363	0.0292345	Distal Intergenic	150538	NA	NA	NA
Chr1	28964098	28965116	-1.90211	0.0292375	Distal Intergenic	-127001	NA	NA	NA
Chr4	97353002	97355023	-1.85078	0.0292606	Intron (uc008tty.2/18027, intron 1 of 10)	-84340	ENSMUSG00000028565	Nfia	nuclear factor I/A
ChrX	25662987	25664619	-2.02024	0.0292776	Intron (uc012hfl.1/100039030, intron 4 of 8)	72551	ENSMUSG00000083628	Gm2030	predicted gene 2030
Chr10	20789179	20790206	-1.92946	0.0293024	Exon (uc007eoe.1/52906, exon 21 of 24)	28553	ENSMUSG00000019986	Ahi1	Abelson helper integration site 1
ChrX	4793494	4794493	1.5893	0.0293091	Distal Intergenic	251890	NA	NA	NA
Chr3	80968451	80969571	-1.86956	0.0293379	Intron (uc008poi.1/54635, intron 3 of 5)	128113	ENSMUSG00000028019	Pdgfc	platelet-derived growth factor, C polypeptide
Chr5	124611433	124612655	-1.48144	0.0293685	Intron (uc008zpb.2/19679, intron 1 of 24)	24536	ENSMUSG00000029406	Pitpnm2	phosphatidylinositol transfer protein, membrane-associated 2
ChrX	10615235	10616969	-1.50829	0.0293962	Distal Intergenic	-259414	NA	NA	NA
Chr6	119143316	119144315	2.23923	0.0294185	Promoter (2-3kb)	2112	ENSMUSG00000051331	Cacna1c	calcium channel, voltage-dependent, L type, alpha 1C subunit
ChrX	57516930	57518445	-1.56508	0.0294206	Promoter (1-2kb)	1642	ENSMUSG00000062949	Atp11c	ATPase, class VI, type 11C
Chr11	75831544	75833509	-1.40283	0.0294396	3' UTR	7775	ENSMUSG00000020846	Rflnb	refilin B
Chr14	66142373	66143702	-1.95825	0.0294706	Distal Intergenic	68145	NA	NA	NA
ChrX	153971198	153972746	-1.50973	0.0294995	Downstream (<1kb)	34171	ENSMUSG00000091736	Yy2	Yy2 transcription factor
Chr18	75820896	75821895	2.08521	0.0295282	Intron (uc008fqg.1/269037, intron 1 of 11)	35455	ENSMUSG00000052928	Ctif	CBP80/20-dependent translation initiation factor
Chr4	51111583	51112582	1.91068	0.0295483	Distal Intergenic	-116968	NA	NA	NA
Chr3	139748783	139749861	-2.10734	0.0296051	Distal Intergenic	879926	NA	NA	NA
Chr3	81057061	81058096	-1.62884	0.0296203	Distal Intergenic	216723	NA	NA	NA
Chr13	104328019	104329047	-1.61731	0.0296218	Distal Intergenic	-203447	NA	NA	NA
Chr1	52658920	52660244	-1.75408	0.0296277	Distal Intergenic	-27305	NA	NA	NA
Chr11	85508737	85509736	1.93741	0.0296625	Intron (uc007krp.2/192197, intron 23 of 23)	54531	ENSMUSG00000059439	Bcas3	breast carcinoma amplified sequence 3
Chr1	145145406	145146506	-1.96808	0.0296824	Distal Intergenic	-341321	NA	NA	NA
Chr5	58640291	58642836	-1.5256	0.0296907	Distal Intergenic	-528851	NA	NA	NA
Chr2	63242225	63243224	1.56049	0.0297238	Distal Intergenic	-219881	NA	NA	NA
Chr11	90368533	90369532	1.85569	0.0297339	Intron (uc007kwu.2/20913, intron 16 of 17)	40769	ENSMUSG00000020546	Stxbp4	syntaxin binding protein 4
ChrX	90890289	90891288	1.71852	0.0297587	Distal Intergenic	6335	NA	NA	NA
Chr3	81321573	81322572	2.04741	0.0297679	Distal Intergenic	-413966	NA	NA	NA
Chr5	94814946	94815945	1.68125	0.0297904	Distal Intergenic	8581	NA	NA	NA
Chr14	7506217	7508243	-1.49204	0.0298008	Exon (uc007sdo.1/uc007sdo.1, exon 3 of 4)	351720	ENSMUSG00000093985	Gm10406	predicted gene 10406
Chr17	31706990	31707989	1.22423	0.0298047	Intron (uc008bvh.2/18771, intron 1 of 11)	5272	ENSMUSG00000006705	Pknox1	Pbx/knotted 1 homeobox
Chr16	43617863	43618862	2.51781	0.0298103	Promoter (<=1kb)	-239	ENSMUSG00000022708	Zbtb20	zinc finger and BTB domain containing 20
Chr3	34833280	34834279	-1.86772	0.029825	Distal Intergenic	284353	NA	NA	NA
Chr1	38042062	38043440	-1.87141	0.0298339	3' UTR	10613	ENSMUSG00000058407	Txndc9	thioredoxin domain containing 9
Chr3	91511433	91513098	-1.70377	0.0298618	Distal Intergenic	-305407	NA	NA	NA
Chr5	7844288	7845641	-2.04877	0.0299025	Distal Intergenic	-114831	NA	NA	NA
Chr8	14804222	14805732	-1.71142	0.0300032	Intron (uc009kyy.2/244310, intron 9 of 15)	26449	ENSMUSG00000047495	Dlgap2	DLG associated protein 2
Chr5	53844190	53845731	-1.52981	0.0300059	Distal Intergenic	-101287	NA	NA	NA
Chr2	68750167	68751334	-1.76538	0.0300213	Intron (uc008jxs.1/241447, intron 1 of 9)	50553	ENSMUSG00000027035	Cers6	ceramide synthase 6
Chr13	41988546	41989545	2.12392	0.0300525	Intron (uc007qfj.1/100038577, intron 3 of 6)	27262	ENSMUSG00000113856	Gm10790	predicted gene 10790
Chr5	15150961	15152723	-1.41052	0.0300621	Intron (uc008wmn.1/74062, intron 7 of 8)	10152	ENSMUSG00000091255	Speer4e	spermatogenesis associated glutamate (E)-rich protein 4e
Chr5	54066921	54067920	1.93644	0.0300635	Distal Intergenic	31023	NA	NA	NA
Chr10	46661910	46663595	-2.03201	0.0301098	Distal Intergenic	1269565	NA	NA	NA
Chr3	33203512	33204743	-1.7216	0.0301572	Distal Intergenic	-161508	NA	NA	NA
Chr7	36196800	36197851	-1.62337	0.0301883	Intron (uc009gjv.1/72140, intron 5 of 18)	14688	ENSMUSG00000023072	Cep89	centrosomal protein 89
Chr3	141561596	141563810	-1.3891	0.030196	Intron (uc008rog.1/12167, intron 1 of 10)	30677	ENSMUSG00000052430	Bmpr1b	bone morphogenetic protein receptor, type 1B
ChrX	29809425	29810424	1.85213	0.0302042	Distal Intergenic	137284	NA	NA	NA
Chr13	7805751	7806840	-2.00814	0.0302147	Distal Intergenic	-395315	NA	NA	NA
Chr14	96358584	96360772	-1.38639	0.0302308	Distal Intergenic	78099	NA	NA	NA
Chr15	54471838	54472837	1.72418	0.0302531	Distal Intergenic	68917	NA	NA	NA
Chr3	51683446	51684479	-1.53299	0.030273	Intron (uc008pef.2/433586, intron 1 of 4)	-82989	ENSMUSG00000061143	Maml3	mastermind like transcriptional coactivator 3
Chr1	147739738	147741584	-1.7204	0.0302782	Distal Intergenic	-601212	NA	NA	NA
Chr18	7801985	7803184	-2.01203	0.030324	Distal Intergenic	-65672	NA	NA	NA
Chr1	186645624	186647191	-2.25028	0.0303805	Promoter (<=1kb)	0	ENSMUSG00000088559	Mir1981	microRNA 1981
Chr1	4309399	4310398	1.99875	0.0303852	Intron (uc007aew.1/19888, intron 3 of 3)	39997	ENSMUSG00000025900	Rp1	retinitis pigmentosa 1 (human)
Chr9	101552809	101553808	2.53734	0.030392	Distal Intergenic	-398647	NA	NA	NA
Chr4	85128821	85129820	1.73379	0.0304203	Distal Intergenic	277461	NA	NA	NA
Chr1	99931781	99933692	-1.59848	0.0304305	Intron (uc007cfo.1/18484, intron 1 of 25)	10644	ENSMUSG00000026335	Pam	peptidylglycine alpha-amidating monooxygenase
ChrX	58268529	58270401	-1.74262	0.0304487	Intron (uc009tig.1/uc009tig.1, intron 1 of 2)	-99152	ENSMUSG00000071753	Cdr1os	cerebellar degeneration related antigen 1, opposite strand
Chr7	13119288	13120939	-1.6445	0.0305188	Intron (uc009fed.2/73090, intron 3 of 5)	21388	ENSMUSG00000030385	2900092C05Rik	RIKEN cDNA 2900092C05 gene
Chr19	37001786	37002785	1.81431	0.0305339	Promoter (1-2kb)	1217	ENSMUSG00000040565	Btaf1	B-TFIID TATA-box binding protein associated factor 1
Chr5	48804727	48805858	-1.91141	0.0305419	Exon (uc008xjy.1/uc008xjy.1, exon 4 of 4)	41096	ENSMUSG00000029089	Pacrgl	PARK2 co-regulated-like
ChrX	88781600	88782942	-1.80316	0.0305579	Distal Intergenic	143761	NA	NA	NA
Chr13	66670165	66671164	2.04192	0.0306363	Intron (uc007qzp.1/uc007qzp.1, intron 2 of 6)	-334686	ENSMUSG00000074826	Gm10767	predicted gene 10767
ChrX	16137146	16138145	2.43759	0.0306507	Distal Intergenic	37139	NA	NA	NA
ChrX	30760725	30761819	-1.43649	0.0306688	Distal Intergenic	-61431	NA	NA	NA
Chr6	102898291	102900056	-1.9358	0.0306692	Distal Intergenic	-483630	NA	NA	NA
Chr2	48224673	48226082	-1.90426	0.0306936	Distal Intergenic	-443547	NA	NA	NA
Chr17	77271126	77273594	-1.79358	0.0307145	Distal Intergenic	1010763	NA	NA	NA
Chr6	59144069	59145068	1.91013	0.0307741	Promoter (13-14kb)	-13796	ENSMUSG00000049232	Tigd2	tigger transposable element derived 2
Chr10	39623613	39624881	-1.72622	0.0307892	Promoter (4-5kb)	-4569	NA	Mfsd4b4	major facilitator superfamily domain containing 4B4
Chr9	67739612	67740897	-1.80864	0.0308142	Exon (uc012gwg.1/320528, exon 19 of 27)	51409	ENSMUSG00000035284	Vps13c	vacuolar protein sorting 13C
Chr1	33967353	33968680	-2.27588	0.0308213	Promoter (2-3kb)	2283	ENSMUSG00000026131	Dst	dystonin
ChrX	85385549	85386915	-1.99874	0.0308221	Distal Intergenic	-24587	NA	NA	NA
Chr13	20339524	20341346	-1.67224	0.0308456	Intron (uc007ppm.1/140580, intron 5 of 6)	62301	ENSMUSG00000041112	Elmo1	engulfment and cell motility 1
Chr5	47999873	48001055	-2.15731	0.0308486	Distal Intergenic	-373339	NA	NA	NA
Chr15	47012220	47013741	1.59494	0.0308672	Distal Intergenic	433006	NA	NA	NA
Chr12	106475275	106476685	-1.52342	0.030875	Promoter (14-15kb)	-14328	ENSMUSG00000041359	Tcl1	T cell lymphoma breakpoint 1
Chr16	54109825	54111812	-1.68585	0.0309194	Distal Intergenic	1171584	NA	NA	NA
Chr6	47182965	47183964	2.13843	0.0309377	Promoter (10-11kb)	-10431	ENSMUSG00000039419	Cntnap2	contactin associated protein-like 2
Chr5	112327724	112328723	2.06525	0.0309693	Distal Intergenic	316283	NA	NA	NA
Chr10	9119904	9121352	2.97179	0.0309944	Distal-Intergenic	273654	NA	NA	NA
Chr6	140242039	140243433	-1.45322	0.031009	Distal Intergenic	-129187	NA	NA	NA
Chr2	11920278	11921632	-1.68028	0.0310091	Distal Intergenic	214446	NA	NA	NA
Chr11	88763635	88764762	-1.70765	0.0310173	Distal Intergenic	-37735	NA	NA	NA
Chr11	119723448	119724447	1.96853	0.0310303	Intron (uc007mqz.1/74370, intron 20 of 33)	-31116	ENSMUSG00000025583	Rptor	regulatory associated protein of MTOR, complex 1
Chr2	181164788	181165807	-1.59389	0.0310403	Promoter (5-6kb)	-5695	ENSMUSG00000027583	Zbtb46	zinc finger and BTB domain containing 46
Chr3	149735203	149736852	-1.56806	0.0310697	Distal Intergenic	-1082759	NA	NA	NA
Chr17	68690983	68692556	-1.55012	0.0310876	Intron (uc008dkk.2/320858, intron 2 of 6)	67846	ENSMUSG00000041565	L3mbtl4	L3MBTL4 histone methyl-lysine binding protein
Chr6	135292609	135293670	-1.47829	0.0310962	Promoter (19-20kb)	-19279	ENSMUSG00000030208	Emp1	epithelial membrane protein 1
Chr15	33205075	33206074	1.86116	0.0311126	Intron (uc007vkz.1/54381, intron 3 of 3)	129620	ENSMUSG00000058101	1700084J12Rik	ribosomal protein L7-like 1 pseudogene
Chr5	62698789	62699788	1.83641	0.0311325	Distal Intergenic	303825	NA	NA	NA
Chr17	38091534	38093256	-1.52219	0.0311934	Promoter (1-2kb)	-1567	ENSMUSG00000109376	Olfr761	olfactory receptor 761
Chr14	76463900	76464899	2.66522	0.0312204	Distal Intergenic	45723	NA	NA	NA
Chr3	103359278	103360316	-1.90405	0.0312261	Promoter (18-19kb)	-18888	ENSMUSG00000027849	Syt6	synaptotagmin VI
Chr2	175380370	175382307	-1.70601	0.0312263	Distal Intergenic	-119092	NA	NA	NA
Chr1	96692226	96693225	1.95159	0.0312513	Distal Intergenic	-516980	NA	NA	NA
Chr6	50642680	50643852	-1.72813	0.0312681	Distal Intergenic	-38288	NA	NA	NA
Chr1	74286249	74288095	-1.61058	0.0313085	Promoter (2-3kb)	2784	ENSMUSG00000006304	Arpc2	actin related protein 2/3 complex, subunit 2
Chr8	53993532	53994888	-1.49627	0.0313277	Distal Intergenic	-602192	NA	NA	NA
Chr17	31638998	31639997	2.31241	0.0313461	Promoter (<=1kb)	-760	ENSMUSG00000024037	Wdr4	WD repeat domain 4
Chr5	79606336	79607555	-1.61843	0.0314466	Distal Intergenic	-1665563	NA	NA	NA
Chr19	16119035	16120056	-1.71137	0.0314562	Distal Intergenic	-59556	NA	NA	NA
Chr1	168346969	168348376	-1.59994	0.0315092	Promoter (7-8kb)	-7010	ENSMUSG00000040596	Pogk	pogo transposable element with KRAB domain
Chr4	42506307	42507657	-1.50476	0.0315095	Intron (uc012dcr.1/100039939, intron 1 of 1)	34112	ENSMUSG00000094066	Fam205a2	family with sequence similarity 205, member A2
Chr12	15364361	15365370	-1.47921	0.0315145	Distal Intergenic	458221	NA	NA	NA
Chr12	56942736	56944006	-1.88519	0.0315199	Intron (uc007noz.1/52592, intron 2 of 4)	5383	ENSMUSG00000012076	Brms1l	breast cancer metastasis-suppressor 1-like
Chr1	33535235	33536234	1.88118	0.0315789	3' UTR	142753	ENSMUSG00000026134	Prim2	DNA primase, p58 subunit
Chr5	28834043	28835275	1.64522	0.0316183	Intron (uc008wub.1/654796, intron 1 of 6)	-40402	ENSMUSG00000002633	Shh	sonic hedgehog
Chr5	116704202	116705201	2.5603	0.0316335	Intron (uc008zey.1/269693, intron 1 of 13)	33793	ENSMUSG00000043913	Ccdc60	coiled-coil domain containing 60
Chr3	101948283	101949793	-1.54392	0.0316341	3' UTR	51106	ENSMUSG00000027860	Vangl1	VANGL planar cell polarity 1
Chr13	6699677	6700817	-1.6177	0.0316349	Distal Intergenic	-51707	NA	NA	NA
Chr1	45844579	45845578	1.77877	0.0316849	Promoter (6-7kb)	-6768	ENSMUSG00000025995	Wdr75	WD repeat domain 75
ChrX	24813028	24814064	-1.72098	0.031818	Distal Intergenic	-84447	NA	NA	NA
Chr15	63232372	63233945	-1.99679	0.0318466	Distal Intergenic	406349	NA	NA	NA
Chr11	93206387	93207864	-2.22836	0.0318531	Intron (uc007kxg.1/72605, intron 4 of 4)	245783	ENSMUSG00000056158	Car10	carbonic anhydrase 10
Chr14	54186320	54187319	2.12332	0.0319007	Intron (uc011zkv.1/uc011zkv.1, intron 1 of 1)	686285	ENSMUSG00000022174	Dad1	defender against cell death 1
ChrX	96168491	96169490	1.79517	0.0319095	Distal Intergenic	34966	NA	NA	NA
Chr7	32236408	32237991	-1.64258	0.0319214	Distal Intergenic	148620	NA	NA	NA
Chr9	64503096	64504192	-1.83367	0.0319221	Intron (uc012gvd.1/214058, intron 9 of 20)	-29978	ENSMUSG00000036466	Megf11	multiple EGF-like-domains 11
Chr4	154591080	154592093	-1.52051	0.0319417	Intron (uc008wcz.1/20481, intron 1 of 6)	4551	ENSMUSG00000029050	Ski	ski sarcoma viral oncogene homolog (avian)
Chr3	94009507	94010585	-1.84218	0.0319518	Distal Intergenic	-27392	NA	NA	NA
Chr6	107936780	107938636	1.48637	0.0319539	Distal Intergenic	-76404	NA	NA	NA
Chr2	65652646	65654345	-1.46668	0.0319633	Distal Intergenic	-29479	NA	NA	NA
Chr15	72062158	72063255	-1.57021	0.0319692	Distal Intergenic	-197501	NA	NA	NA
Chr11	102187347	102188631	-1.59368	0.031981	Promoter (6-7kb)	-6937	ENSMUSG00000020923	Ubtf	upstream binding transcription factor, RNA polymerase I
Chr3	31653676	31655403	-1.59441	0.0320234	Distal Intergenic	-146222	NA	NA	NA
Chr18	4480313	4481633	-1.54576	0.0320461	Distal Intergenic	104723	NA	NA	NA
ChrX	113275619	113276618	2.01636	0.0320928	Distal Intergenic	-285935	NA	NA	NA
Chr17	4250018	4251348	-1.53807	0.0320964	Distal Intergenic	-553757	NA	NA	NA
Chr13	58379473	58380472	2.19261	0.032104	Promoter (3-4kb)	-3924	ENSMUSG00000021552	Gkap1	G kinase anchoring protein 1
Chr15	65903387	65905146	-1.56658	0.0321123	Intron (uc007wab.2/110862, intron 1 of 14)	-95021	ENSMUSG00000072511	Hhla1	HERV-H LTR-associating 1
Chr6	89439242	89440241	2.25573	0.032121	Intron (uc009cwh.2/66098, intron 4 of 7)	105405	ENSMUSG00000030086	Chchd6	coiled-coil-helix-coiled-coil-helix domain containing 6
Chr3	56727874	56728873	1.99468	0.0321328	Distal Intergenic	376968	NA	NA	NA
Chr1	75955514	75956513	1.82061	0.032138	Distal Intergenic	410995	NA	NA	NA
Chr7	131895251	131897150	-1.66582	0.0321697	Distal Intergenic	-615225	NA	NA	NA
ChrX	3909803	3910802	1.63156	0.0321821	Promoter (2-3kb)	2792	ENSMUSG00000094307	Btbd35f28	BTB domain containing 35, family member 28
Chr7	107449450	107450449	2.13585	0.0322545	Intron (uc009imt.2/320452, intron 5 of 12)	7193	ENSMUSG00000051048	P4ha3	procollagen-proline, 2-oxoglutarate 4-dioxygenase (proline 4-hydroxylase), alpha polypeptide III
Chr1	182240968	182241967	1.92316	0.0322598	Promoter (18-19kb)	-18640	ENSMUSG00000038855	Itpkb	inositol 1,4,5-trisphosphate 3-kinase B
Chr4	71055796	71057631	-1.68321	0.0322972	Distal Intergenic	748831	NA	NA	NA
ChrX	19259831	19260830	1.96648	0.032375	Distal Intergenic	-375866	NA	NA	NA
Chr15	14655716	14657267	-1.49059	0.0323868	Distal Intergenic	-1552322	NA	NA	NA
Chr14	113262200	113263402	-2.12211	0.0324235	Distal Intergenic	1187863	NA	NA	NA
Chr14	40898639	40899732	-2.00671	0.0324355	Distal Intergenic	-612263	NA	NA	NA
Chr5	144702122	144703611	-1.60552	0.0325282	Exon (uc009ald.1/uc009ald.1, exon 4 of 6)	10849	ENSMUSG00000079109	Pms2	PMS1 homolog2, mismatch repair system component
Chr15	5395239	5396849	-1.56172	0.0326238	Distal Intergenic	-201408	NA	NA	NA
Chr4	34154051	34156041	-1.7372	0.0326287	Promoter (17-18kb)	-17009	ENSMUSG00000028264	Spaca1	sperm acrosome associated 1
Chr14	47352812	47353811	1.83309	0.03264	Distal Intergenic	-26405	NA	NA	NA
Chr13	8811156	8812477	1.44365	0.0326754	Intron (uc007pki.1/207615, intron 13 of 13)	57504	ENSMUSG00000021147	Wdr37	WD repeat domain 37
Chr7	89500336	89501348	1.49066	0.0327195	Intron (uc009ida.2/269959, intron 2 of 29)	16132	ENSMUSG00000070469	Adamtsl3	ADAMTS-like 3
Chr10	33619220	33620938	-1.70984	0.0327633	Promoter (3-4kb)	-3979	ENSMUSG00000039552	Rsph4a	radial spoke head 4 homolog A (Chlamydomonas)
Chr7	37475025	37476024	2.1961	0.0327817	Promoter (7-8kb)	-7113	ENSMUSG00000021217	Tshz3	teashirt zinc finger family member 3
ChrX	118665099	118666098	1.70871	0.0327825	Distal Intergenic	844896	NA	NA	NA
Chr17	61017129	61018137	-1.4281	0.0328553	Distal Intergenic	-1864384	NA	NA	NA
ChrX	40014750	40016009	-1.5896	0.0328762	Intron (uc009tbc.1/23963, intron 20 of 32)	156250	ENSMUSG00000005696	Sh2d1a	SH2 domain containing 1A
Chr2	85580159	85581204	-1.5318	0.0329039	Promoter (12-13kb)	-12316	ENSMUSG00000110879	Olfr1010	olfactory receptor 1010
Chr3	105000162	105001208	-2.33643	0.0329087	Distal-Intergenic	-144098	NA	NA	NA
Chr3	34550467	34551608	-1.68571	0.0329241	Promoter (1-2kb)	1540	ENSMUSG00000074637	Sox2	SRY (sex determining region Y)-box 2
ChrX	159713673	159714846	-1.63587	0.0329342	Distal Intergenic	272733	NA	NA	NA
Chr1	17014498	17015602	-2.0291	0.0329864	Intron (uc007aka.1/57339, intron 2 of 4)	72277	ENSMUSG00000042686	Jph1	junctophilin 1
Chr8	64137664	64139406	-1.46498	0.0329875	Intron (uc009lue.1/72333, intron 9 of 19)	-67725	ENSMUSG00000058056	Palld	palladin, cytoskeletal associated protein
Chr5	146368216	146369215	1.77001	0.0330029	Intron (uc012egw.1/100041375, intron 13 of 25)	-137624	ENSMUSG00000038656	Cyp3a16	cytochrome P450, family 3, subfamily a, polypeptide 16
Chr8	16695359	16697092	-1.61012	0.0330321	Intron (uc009kzp.1/94109, intron 5 of 69)	-526521	ENSMUSG00000093142	Mir3106	microRNA 3106
Chr9	87213617	87214789	-2.49248	0.033051	Distal-Intergenic	-63250	NA	NA	NA
Chr1	139552183	139553326	-2.56835	0.033077	Distal-Intergenic	-309706	NA	NA	NA
Chr4	99099928	99101161	-1.59228	0.0331282	Distal Intergenic	-221829	NA	NA	NA
ChrX	162421876	162423035	-1.71948	0.0331323	Distal Intergenic	-185377	NA	NA	NA
Chr1	70796449	70798238	-1.50768	0.0331365	Exon (uc007bjk.1/320460, exon 3 of 4)	21176	ENSMUSG00000045648	Vwc2l	von Willebrand factor C domain-containing protein 2-like
Chr7	101312885	101313884	1.76348	0.0331425	Intron (uc009iin.1/uc009iin.1, intron 1 of 2)	-503936	NA	Bc1-ps1	brain cytoplasmic RNA 1, pseudogene 1
Chr5	15029829	15030828	1.92058	0.0331584	Promoter (2-3kb)	2179	ENSMUSG00000091897	Gm17019	predicted gene 17019
Chr1	76612144	76613143	1.74571	0.0331592	Distal Intergenic	898520	NA	NA	NA
Chr2	125707245	125708849	-1.75826	0.033165	Intron (uc008mde.1/69976, intron 2 of 9)	15256	ENSMUSG00000027207	Galk2	galactokinase 2
Chr5	89725188	89726383	-1.62384	0.0331882	Distal Intergenic	160407	NA	NA	NA
Chr10	121380911	121382139	-1.40945	0.0331956	Intron (uc007hgb.1/117600, intron 1 of 21)	102110	ENSMUSG00000020121	Srgap1	SLIT-ROBO Rho GTPase activating protein 1
Chr3	133438488	133439487	-1.45344	0.0332225	Distal Intergenic	-231134	NA	NA	NA
Chr17	84486396	84488041	-1.70366	0.0332432	Distal Intergenic	99246	NA	NA	NA
Chr10	60886796	60887795	2.25402	0.0332737	3' UTR	6076	ENSMUSG00000037171	Nodal	nodal
Chr14	18487963	18489604	-1.70471	0.0332779	Promoter (3-4kb)	-3870	ENSMUSG00000021779	Thrb	thyroid hormone receptor beta
Chr12	65712179	65713583	-1.59386	0.0332785	Distal Intergenic	-136294	NA	NA	NA
Chr5	137740741	137742197	-1.39872	0.0333231	Exon (uc009acb.2/83701, exon 6 of 20)	4844	ENSMUSG00000051502	Ufsp1	UFM1-specific peptidase 1
Chr4	26957967	26958966	1.97379	0.0333243	Distal Intergenic	-684168	NA	NA	NA
Chr2	99676369	99678181	-1.68753	0.033343	Distal Intergenic	1783022	NA	NA	NA
Chr10	39346010	39347009	2.15524	0.0333527	Exon (uc007ewa.1/103213, exon 2 of 9)	13270	ENSMUSG00000019842	Traf3ip2	TRAF3 interacting protein 2
Chr13	41538509	41539508	2.09675	0.03337	Intron (uc007qfe.2/18003, intron 1 of 7)	43181	ENSMUSG00000021365	Nedd9	neural precursor cell expressed, developmentally down-regulated gene 9
Chr11	97812507	97813699	-2.04713	0.0333789	Intron (uc007lfc.2/72324, intron 7 of 13)	34061	ENSMUSG00000017417	Plxdc1	plexin domain containing 1
Chr14	43372740	43374105	1.44403	0.0334514	Exon (uc007tct.1/uc007tct.1, exon 4 of 5)	652239	ENSMUSG00000095384	1700001F09Rik	RIKEN cDNA 1700001F09 gene
Chr10	11303237	11304551	-1.49466	0.0334851	Distal Intergenic	239994	NA	NA	NA
Chr4	71517184	71519372	-1.55413	0.0334856	Distal Intergenic	287090	NA	NA	NA
Chr4	100985328	100987006	1.80191	0.0334956	Distal Intergenic	32626	NA	NA	NA
Chr5	109608161	109610099	-1.60456	0.0335209	Intron (uc009vdk.1/231589, intron 1 of 5)	11027	ENSMUSG00000091635	Vmn2r13	vomeronasal 2, receptor 13
Chr3	7188029	7189028	2.09	0.033555	Distal Intergenic	-177576	NA	NA	NA
Chr10	6601661	6603359	-1.39637	0.0335682	Promoter (2-3kb)	2517	ENSMUSG00000040624	Plekhg1	pleckstrin homology domain containing, family G (with RhoGef domain) member 1
Chr13	65963482	65965102	-1.68989	0.0335847	Distal Intergenic	-249287	NA	NA	NA
ChrX	10993263	10994948	-1.59152	0.033616	Distal Intergenic	88315	NA	NA	NA
Chr2	5944810	5945873	-1.86488	0.0336282	Promoter (<=1kb)	481	ENSMUSG00000043241	Upf2	UPF2 regulator of nonsense transcripts homolog (yeast)
Chr17	35163138	35164137	2.45008	0.0336782	Promoter (<=1kb)	824	ENSMUSG00000036185	Sapcd1	suppressor APC domain containing 1
Chr11	45392408	45393985	-1.65253	0.0336891	Distal Intergenic	-271481	NA	NA	NA
Chr15	100117498	100118635	-1.61222	0.0337529	Intron (uc007xqu.1/75002, intron 3 of 4)	6230	ENSMUSG00000045631	Tmprss12	transmembrane (C-terminal) protease, serine 12
Chr3	26489883	26491737	-1.55999	0.0338081	Distal Intergenic	-44816	NA	NA	NA
Chr18	41385827	41387146	-1.64271	0.0338658	Distal Intergenic	711095	NA	NA	NA
Chr15	79701919	79702918	2.31144	0.0338671	Promoter (19-20kb)	-19920	ENSMUSG00000009585	Apobec3	apolipoprotein B mRNA editing enzyme, catalytic polypeptide 3
Chr1	112601815	112603171	-1.64552	0.0338872	Distal Intergenic	270778	NA	NA	NA
Chr16	30762400	30763560	-1.54572	0.0339098	Distal Intergenic	162591	NA	NA	NA
Chr8	35257871	35259869	-1.76189	0.0339535	Distal Intergenic	40254	NA	NA	NA
ChrX	26916284	26917741	-1.4385	0.0339747	Promoter (12-13kb)	-12033	ENSMUSG00000073247	Gm10486	predicted gene 10486
Chr11	109600209	109601208	1.97391	0.0339905	Promoter (16-17kb)	-16639	ENSMUSG00000020614	Fam20a	family with sequence similarity 20, member A
Chr7	83192408	83193874	-1.53754	0.0340243	Distal Intergenic	-180899	NA	NA	NA
Chr4	45931444	45932889	-1.63897	0.0340292	Intron (uc012ddp.1/381522, intron 20 of 37)	28269	ENSMUSG00000035539	Ccdc180	coiled-coil domain containing 180
Chr15	93874469	93876458	-1.31922	0.0340947	Distal Intergenic	358323	NA	NA	NA
Chr12	33986661	33987799	-1.57589	0.0340994	Promoter (<=1kb)	0	ENSMUSG00000020564	Atxn7l1	ataxin 7-like 1
Chr1	197067407	197068526	1.23827	0.0341003	Distal Intergenic	-64498	NA	NA	NA
Chr19	21323251	21324250	1.79606	0.034115	Distal Intergenic	-22518	NA	NA	NA
Chr11	70513545	70515188	-1.46546	0.0341935	Promoter (<=1kb)	0	ENSMUSG00000057054	Inca1	inhibitor of CDK, cyclin A1 interacting protein 1
Chr14	8355899	8356898	2.01496	0.0342849	Intron (uc007sdw.2/100042149, intron 4 of 5)	70249	ENSMUSG00000072726	Gm5797	predicted gene 5797
Chr14	117657324	117659177	-1.40727	0.0342982	Intron (uc007uyj.1/23888, intron 2 of 3)	332787	ENSMUSG00000058571	Gpc6	glypican 6
ChrX	64127455	64129142	-1.53201	0.0343024	Distal Intergenic	-35155	NA	NA	NA
ChrX	98182084	98183083	3.02888	0.0343043	Intron (uc009tws.2/83558, intron 9 of 29)	71895	ENSMUSG00000009670	Tex11	testis expressed gene 11
Chr16	26724392	26725878	-1.8362	0.034397	3' UTR	142601	ENSMUSG00000022514	Il1rap	interleukin 1 receptor accessory protein
ChrX	120519819	120520941	-1.85946	0.0344081	Distal Intergenic	302651	NA	NA	NA
Chr13	76162757	76163800	-2.54347	0.0344582	Promoter (6-7kb)	-6597	ENSMUSG00000043190	Rfesd	Rieske (Fe-S) domain containing
Chr2	114305638	114306644	1.56904	0.0344738	Distal Intergenic	174020	NA	NA	NA
Chr5	128499812	128500811	1.98136	0.0344742	Intron (uc008zse.1/243274, intron 3 of 8)	387180	ENSMUSG00000049971	Glt1d1	glycosyltransferase 1 domain containing 1
Chr6	48847938	48849013	-1.97458	0.0345129	Promoter (2-3kb)	2684	ENSMUSG00000029811	Aoc1	amine oxidase, copper-containing 1
Chr8	76412064	76413374	1.61709	0.0345136	Distal Intergenic	-535609	NA	NA	NA
Chr6	29304212	29305565	-1.71387	0.0345142	Intron (uc009bdg.1/12321, intron 1 of 6)	6093	ENSMUSG00000029767	Calu	calumenin
Chr12	77229709	77230708	2.41631	0.0346146	Intron (uc007nxu.1/13983, intron 8 of 9)	40971	ENSMUSG00000063450	Syne2	spectrin repeat containing, nuclear envelope 2
Chr5	10820983	10822768	-1.49072	0.0346858	Distal Intergenic	-42261	NA	NA	NA
ChrX	45557118	45558130	-1.90091	0.0347441	Intron (uc009tbx.2/208884, intron 2 of 9)	3282	ENSMUSG00000036985	Zdhhc9	zinc finger, DHHC domain containing 9
Chr2	164512205	164513432	-1.61937	0.0347951	Promoter (1-2kb)	1598	ENSMUSG00000067704	Wfdc13	WAP four-disulfide core domain 13
Chr13	19050217	19051216	1.59112	0.0348052	Intron (uc007pol.1/218038, intron 1 of 8)	9977	ENSMUSG00000021314	Amph	amphiphysin
Chr2	107228499	107229598	-1.88783	0.0348196	Distal Intergenic	97753	NA	NA	NA
Chr10	44838279	44839278	2.40374	0.0348703	Intron (uc007ezx.1/19072, intron 8 of 14)	51259	ENSMUSG00000019849	Prep	prolyl endopeptidase
Chr5	95891266	95892685	-1.49943	0.0348771	Intron (uc008yeu.1/100041354, intron 1 of 3)	5441	ENSMUSG00000070677	D5Ertd577e	DNA segment, Chr 5, ERATO Doi 577, expressed
Chr16	61393789	61394788	1.80707	0.0348998	Distal Intergenic	-788432	NA	NA	NA
Chr1	141198876	141199875	1.84177	0.0349093	Intron (uc007cwc.1/170788, intron 5 of 11)	-46539	ENSMUSG00000063681	Crb1	crumbs family member 1, photoreceptor morphogenesis associated
Chr3	31620820	31621918	-1.83243	0.0349463	Distal Intergenic	-179707	NA	NA	NA
Chr3	26258333	26259914	-1.70564	0.0349626	Distal Intergenic	-27502	NA	NA	NA
Chr5	89505507	89507333	-1.46562	0.0350511	Intron (uc008yaj.2/54403, intron 6 of 24)	48348	ENSMUSG00000060961	Slc4a4	solute carrier family 4 (anion exchanger), member 4
Chr13	117019852	117021459	1.53449	0.0350665	Distal Intergenic	78437	NA	NA	NA
Chr5	141415029	141416560	-1.54852	0.0350775	Intron (uc009aik.2/108723, intron 1 of 24)	-47992	ENSMUSG00000036526	Card11	caspase recruitment domain family, member 11
Chr18	80279504	80280503	1.94836	0.0350882	Intron (uc008fsj.2/93737, intron 2 of 2)	35870	ENSMUSG00000056214	Pard6g	par-6 family cell polarity regulator gamma
Chr13	23883042	23884249	-1.49785	0.0351161	Exon (uc007pva.1/214158, exon 6 of 6)	8601	ENSMUSG00000064140	Trim38	tripartite motif-containing 38
Chr3	122102718	122103717	1.89612	0.0351231	Promoter (18-19kb)	-18981	ENSMUSG00000028121	Bcar3	breast cancer anti-estrogen resistance 3
Chr10	29031975	29033122	-1.5284	0.0351317	Promoter (<=1kb)	0	ENSMUSG00000019883	Echdc1	enoyl Coenzyme A hydratase domain containing 1
Chr9	16257525	16258829	-1.69079	0.0351664	Distal Intergenic	-74850	NA	NA	NA
Chr13	29498077	29499076	2.10115	0.0351789	Intron (uc007pyn.1/68916, intron 13 of 15)	448381	ENSMUSG00000006191	Cdkal1	CDK5 regulatory subunit associated protein 1-like 1
Chr17	94978825	94981445	-1.34465	0.03524	Distal Intergenic	167787	NA	NA	NA
Chr6	6980902	6981978	-2.15112	0.0352431	Intron (uc009axa.1/71238, intron 1 of 1)	74884	ENSMUSG00000042505	Sdhaf3	succinate dehydrogenase complex assembly factor 3
ChrX	143209646	143211429	-1.55086	0.0352469	Distal Intergenic	-185627	NA	NA	NA
Chr5	94613422	94615372	1.93659	0.0352514	Intron (uc008yei.1/uc008yei.1, intron 3 of 5)	-113851	ENSMUSG00000072822	BC061212	cDNA sequence BC061212
Chr1	193347472	193348584	-1.8617	0.0352822	Distal Intergenic	16857	NA	NA	NA
Chr2	112418230	112419778	-1.43886	0.0353319	Intron (uc008lpe.2/74268, intron 2 of 5)	18391	ENSMUSG00000003604	Aven	apoptosis, caspase activation inhibitor
Chr4	126618398	126619429	-1.43644	0.0353351	Promoter (17-18kb)	-17920	ENSMUSG00000042446	Zmym4	zinc finger, MYM-type 4
Chr2	55195712	55196711	2.34867	0.0353912	Distal Intergenic	-92481	NA	NA	NA
Chr9	113492161	113493160	2.00075	0.0354483	Intron (uc009rwk.1/uc009rwk.1, intron 1 of 4)	124217	ENSMUSG00000032504	Pdcd6ip	programmed cell death 6 interacting protein
Chr17	90502659	90503658	2.25269	0.0354578	Intron (uc008dwa.2/18189, intron 15 of 16)	525950	ENSMUSG00000024109	Nrxn1	neurexin I
Chr19	9384413	9386109	-1.48991	0.0354837	Distal Intergenic	-174357	NA	NA	NA
Chr11	88812734	88813733	1.52758	0.035524	Exon (uc007kvx.2/74617, exon 2 of 13)	3023	ENSMUSG00000000278	Scpep1	serine carboxypeptidase 1
Chr5	30122196	30123448	-1.74418	0.0355468	Distal Intergenic	41259	NA	NA	NA
Chr7	146968569	146969759	-1.85284	0.0355902	Distal Intergenic	-50314	NA	NA	NA
ChrX	91670219	91671218	2.58429	0.0356094	Distal Intergenic	57726	NA	NA	NA
Chr10	101774595	101776488	-1.59926	0.0356521	Intron (uc011xmt.1/67569, intron 1 of 5)	-60583	ENSMUSG00000019888	Mgat4c	MGAT4 family, member C
Chr10	62842154	62844036	-1.45452	0.0356669	Promoter (1-2kb)	-1155	ENSMUSG00000036764	Dnajc12	DnaJ heat shock protein family (Hsp40) member C12
Chr8	130665718	130666717	1.69215	0.0356929	Exon (uc009nzp.1/uc009nzp.1, exon 3 of 3)	-216256	ENSMUSG00000025810	Nrp1	neuropilin 1
Chr17	18875445	18876881	1.53742	0.035709	Distal Intergenic	156754	NA	NA	NA
Chr17	31083761	31084760	2.22139	0.0357469	Promoter (6-7kb)	-6868	ENSMUSG00000054134	Umodl1	uromodulin-like 1
Chr16	97563632	97565421	-1.89113	0.0357589	Promoter (12-13kb)	-12914	ENSMUSG00000040605	Bace2	beta-site APP-cleaving enzyme 2
Chr1	164359904	164361431	-1.64296	0.0358348	Intron (uc007dga.2/103967, intron 1 of 20)	46734	ENSMUSG00000040265	Dnm3	dynamin 3
Chr13	51239421	51240420	2.53475	0.0358823	Exon (uc007qly.1/20729, exon 5 of 6)	9728	ENSMUSG00000021395	Spin1	spindlin 1
Chr5	57628652	57629669	-2.01549	0.0359558	Distal Intergenic	479489	NA	NA	NA
Chr2	59561132	59562152	-1.68684	0.0359708	Promoter (18-19kb)	-18707	ENSMUSG00000035168	Tanc1	tetratricopeptide repeat, ankyrin repeat and coiled-coil containing 1
Chr15	95180741	95182365	-1.46421	0.0359728	Intron (uc007xjq.1/54003, intron 13 of 20)	176318	ENSMUSG00000022454	Nell2	NEL-like 2
Chr2	116934264	116935263	2.61067	0.0360158	Promoter (11-12kb)	-11923	ENSMUSG00000027351	Spred1	sprouty protein with EVH-1 domain 1, related sequence
Chr17	48167292	48168817	-1.68107	0.0360244	Distal Intergenic	-57765	NA	NA	NA
Chr2	115328314	115329671	-1.54098	0.0360878	Intron (uc008lqp.1/100043232, intron 1 of 2)	8266	ENSMUSG00000085582	3110099E03Rik	RIKEN cDNA 3110099E03 gene
Chr8	96623000	96624160	-1.48207	0.0361024	Promoter (<=1kb)	-289	ENSMUSG00000031755	Bbs2	Bardet-Biedl syndrome 2 (human)
Chr5	117215303	117216570	1.53561	0.0362074	Distal Intergenic	-173477	NA	NA	NA
Chr1	164420861	164422341	-1.50633	0.0362206	Promoter (12-13kb)	-12696	ENSMUSG00000040265	Dnm3	dynamin 3
Chr1	58286619	58287618	1.93123	0.0362216	Intron (uc007bbo.1/71872, intron 8 of 34)	19378	ENSMUSG00000038242	Aox4	aldehyde oxidase 4
Chr14	44058040	44059039	1.51965	0.0362227	Distal Intergenic	-31696	NA	NA	NA
Chr1	133383255	133385118	-1.32995	0.0362236	Intron (uc007cng.2/14270, intron 2 of 22)	37052	ENSMUSG00000026425	Srgap2	SLIT-ROBO Rho GTPase activating protein 2
Chr3	11380097	11381096	2.10607	0.0363022	Distal Intergenic	-939973	NA	NA	NA
ChrX	104593443	104595104	-1.65726	0.0363099	Exon (uc009ucg.1/16431, exon 2 of 6)	3595	ENSMUSG00000031239	Itm2a	integral membrane protein 2A
Chr9	3169908	3171346	-1.58289	0.0363409	Distal Intergenic	28467	NA	NA	NA
Chr10	61780478	61781477	3.1617	0.036362	Intron (uc007fgy.2/15275, intron 1 of 17)	21692	ENSMUSG00000037012	Hk1	hexokinase 1
Chr2	59753591	59754590	2.51027	0.0363706	Intron (uc008jtr.1/407823, intron 26 of 35)	-32928	ENSMUSG00000026988	Wdsub1	WD repeat, SAM and U-box domain containing 1
Chr5	24912499	24913837	-1.86733	0.0363723	Intron (uc008wsv.1/231051, intron 4 of 58)	90764	ENSMUSG00000038056	Kmt2c	lysine (K)-specific methyltransferase 2C
Chr17	61336331	61338321	-1.4828	0.036427	Distal Intergenic	1698027	NA	NA	NA
Chr13	85252099	85253793	-1.6118	0.036436	Distal Intergenic	-75289	NA	NA	NA
Chr12	20617733	20618758	-1.97876	0.0364577	Distal Intergenic	202882	NA	NA	NA
ChrX	32898030	32899029	1.75804	0.0364751	Distal Intergenic	-45153	NA	NA	NA
Chr10	121199811	121200837	-1.41842	0.0364958	Distal Intergenic	22807	NA	NA	NA
Chr6	42073084	42075546	1.49691	0.0365068	Promoter (15-16kb)	-15389	ENSMUSG00000047102	Tas2r139	taste receptor, type 2, member 139
Chr5	27519186	27520759	-1.98665	0.0365158	Intron (uc008wtj.1/13483, intron 1 of 3)	-67716	ENSMUSG00000061576	Dpp6	dipeptidylpeptidase 6
Chr10	30544011	30545091	-1.54289	0.0366456	Distal Intergenic	17498	NA	NA	NA
ChrX	80365757	80367121	-2.20939	0.0367221	Intron (uc009trg.1/13405, intron 1 of 1)	77222	ENSMUSG00000045103	Dmd	dystrophin, muscular dystrophy
Chr4	146413604	146414659	-1.60686	0.0367447	Intron (uc008vsm.1/70005, intron 2 of 4)	17674	NA	NA	NA
Chr1	6613797	6614796	2.49372	0.0367565	Intron (uc007afw.1/240690, intron 2 of 23)	-105336	ENSMUSG00000033740	St18	suppression of tumorigenicity 18
Chr17	15567412	15569164	-1.64575	0.0367696	3' UTR	34246	ENSMUSG00000014763	Fam120b	family with sequence similarity 120, member B
Chr8	19854450	19855567	1.37165	0.0367992	Distal Intergenic	23414	NA	NA	NA
Chr9	108625291	108626766	-1.80569	0.036861	Intron (uc009rqt.1/19087, intron 4 of 10)	30817	ENSMUSG00000032601	Prkar2a	protein kinase, cAMP dependent regulatory, type II alpha
Chr3	95076907	95077906	1.62817	0.036879	Promoter (7-8kb)	-7862	ENSMUSG00000038712	Mindy1	MINDY lysine 48 deubiquitinase 1
Chr2	8063672	8064671	1.8661	0.03691	Distal Intergenic	-745847	NA	NA	NA
Chr9	111790843	111791842	2.21201	0.0369143	Distal Intergenic	-198123	NA	NA	NA
Chr1	161082482	161083481	1.70534	0.0369179	Intron (uc007ddy.1/uc007ddy.1, intron 2 of 3)	-78976	ENSMUSG00000040782	Cop1	COP1, E3 ubiquitin ligase
Chr9	115651697	115653056	-1.62068	0.0369875	Distal Intergenic	-165517	NA	NA	NA
Chr19	55316129	55317745	-1.43894	0.0370056	Promoter (<=1kb)	-403	ENSMUSG00000055523	Gucy2g	guanylate cyclase 2g
Chr15	38098072	38099071	2.43974	0.0370129	Distal Intergenic	-49887	NA	NA	NA
Chr8	13343341	13344863	2.73776	0.0370394	Intron-(uc009kxp.1/21781,-intron-2-of-11)	3676	ENSMUSG00000038482	Tfdp1	transcription factor Dp 1
Chr6	132151476	132153239	-1.41111	0.0370845	Intron (uc012euc.1/114600, intron 1 of 2)	7300	ENSMUSG00000067543	Prb1	proline-rich protein BstNI subfamily 1
Chr6	38299852	38301239	-1.56092	0.0371201	Intron (uc009bjz.2/78781, intron 1 of 11)	3323	ENSMUSG00000029826	Zc3hav1	zinc finger CCCH type, antiviral 1
Chr14	111778617	111779819	-1.64	0.0371412	Distal Intergenic	-294518	NA	NA	NA
Chr1	87458683	87459682	1.32891	0.0371591	Distal Intergenic	35695	NA	NA	NA
Chr2	40628133	40629497	-1.65965	0.0371628	Intron (uc008jon.1/94217, intron 66 of 90)	-69765	ENSMUSG00000049252	Lrp1b	low density lipoprotein-related protein 1B
Chr7	139745601	139746600	2.09038	0.0371697	Downstream (2-3kb)	21481	ENSMUSG00000030934	Oat	ornithine aminotransferase
Chr11	120017314	120018313	2.22522	0.037171	Promoter (4-5kb)	-4649	ENSMUSG00000061306	Slc38a10	solute carrier family 38, member 10
Chr13	119716723	119718642	-1.593	0.0371858	Distal Intergenic	213217	NA	NA	NA
Chr11	117808281	117809280	1.74285	0.0371889	Distal Intergenic	21400	NA	NA	NA
Chr6	93500373	93501372	1.79281	0.0372069	Distal Intergenic	362312	NA	NA	NA
Chr12	73532951	73533950	2.64618	0.0372137	Promoter (8-9kb)	-8903	ENSMUSG00000021090	Lrrc9	leucine rich repeat containing 9
Chr3	150692319	150693318	1.58758	0.0372147	Distal Intergenic	-407528	NA	NA	NA
Chr4	95724261	95725512	-2.18022	0.0372451	Intron (uc008ttd.1/230459, intron 5 of 6)	12886	ENSMUSG00000028571	Cyp2j13	cytochrome P450, family 2, subfamily j, polypeptide 13
Chr5	14959056	14960124	1.27733	0.0372595	Intron (uc008wmn.1/74062, intron 1 of 8)	13762	ENSMUSG00000094230	Speer8-ps1	spermatogenesis associated glutamate (E)-rich protein 8, pseudogene 1
Chr12	7157710	7158709	2.73535	0.0372857	Distal Intergenic	-825774	NA	NA	NA
Chr3	55301511	55303163	-1.5569	0.0372879	Promoter (17-18kb)	-17137	ENSMUSG00000027797	Dclk1	doublecortin-like kinase 1
Chr10	12269982	12271863	-1.88514	0.0373014	Intron (uc007ejw.1/22288, intron 50 of 73)	62826	ENSMUSG00000019820	Utrn	utrophin
Chr4	30625391	30626547	-1.80137	0.0373225	Distal Intergenic	-1424535	NA	NA	NA
Chr3	51758023	51759059	-1.48251	0.0373418	Intron (uc008pef.2/433586, intron 1 of 4)	149869	ENSMUSG00000061143	Maml3	mastermind like transcriptional coactivator 3
Chr12	45737471	45739319	-1.64982	0.0373636	Distal Intergenic	51649	NA	NA	NA
Chr11	44497966	44499132	-1.71553	0.0374032	Intron (uc007ink.1/13591, intron 6 of 15)	66330	ENSMUSG00000057098	Ebf1	early B cell factor 1
Chr5	115729236	115730299	-2.53956	0.0374316	Promoter (<=1kb)	0	ENSMUSG00000041733	Coq5	coenzyme Q5 methyltransferase
Chr4	33547208	33549336	-1.44807	0.0374377	Intron (uc012dbk.1/24018, intron 13 of 13)	149922	ENSMUSG00000028274	Rngtt	RNA guanylyltransferase and 5'-phosphatase
Chr14	16298108	16299107	1.98391	0.0374604	Distal Intergenic	-26607	NA	NA	NA
Chr6	132296338	132297959	-1.6062	0.0374623	Intron (uc012euc.1/114600, intron 1 of 2)	13796	NA	Gm4736	predicted gene 4736
Chr12	19093470	19095429	-1.7356	0.0375147	Distal Intergenic	572154	NA	NA	NA
Chr5	87116339	87118337	-1.59476	0.0375405	Promoter (11-12kb)	-11016	ENSMUSG00000035861	Tmprss11b	transmembrane protease, serine 11B
Chr18	37779816	37780815	1.70524	0.0376345	Intron (uc008eoy.1/100384868, intron 1 of 3)	17562	ENSMUSG00000050304	Slc25a2	solute carrier family 25 (mitochondrial carrier, ornithine transporter) member 2
Chr18	50520246	50522012	-1.58024	0.0376638	Distal Intergenic	82223	NA	NA	NA
Chr3	91812333	91813938	-1.48471	0.0378693	Promoter (4-5kb)	-4567	ENSMUSG00000042244	Pglyrp3	peptidoglycan recognition protein 3
Chr5	50139842	50142214	-1.39411	0.0379214	Distal Intergenic	308021	NA	NA	NA
ChrX	51264454	51266190	-1.53673	0.0379227	Distal Intergenic	-163581	NA	NA	NA
Chr4	21812781	21813780	2.39028	0.0379657	Intron (uc008sdj.1/230027, intron 1 of 6)	5959	ENSMUSG00000028247	Coq3	coenzyme Q3 methyltransferase
Chr5	105135364	105136363	1.76348	0.0379657	Distal Intergenic	152724	NA	NA	NA
Chr11	40202992	40204249	-1.56637	0.0379876	Distal Intergenic	301935	NA	NA	NA
Chr10	98923858	98925651	-1.41145	0.038041	Distal Intergenic	197993	NA	NA	NA
Chr12	89269777	89270776	1.85538	0.0380462	Intron (uc007ojq.1/uc007ojq.1, intron 2 of 2)	76830	ENSMUSG00000096576	Oog1	oogenesin 1
Chr12	46487864	46488863	1.58976	0.0380646	Distal Intergenic	-312394	NA	NA	NA
Chr12	73331370	73332425	-1.58643	0.0380792	Intron (uc007nvi.1/104001, intron 1 of 6)	4301	ENSMUSG00000021087	Rtn1	reticulon 1
Chr6	21765168	21767268	-1.52202	0.0380799	Intron (uc012eij.1/269831, intron 4 of 6)	34899	ENSMUSG00000029669	Tspan12	tetraspanin 12
Chr14	84705863	84707401	-1.62368	0.0380827	Distal Intergenic	-135969	NA	NA	NA
Chr1	153074254	153075536	-1.79281	0.038113	Distal Intergenic	-116092	NA	NA	NA
Chr19	50865867	50866966	-2.28807	0.0381335	Distal Intergenic	-112765	NA	NA	NA
Chr13	62759009	62760008	1.89548	0.0381379	Distal Intergenic	-33467	NA	NA	NA
ChrX	148747259	148748325	-1.94088	0.0381771	Distal Intergenic	26598	NA	NA	NA
Chr18	20593766	20595190	-1.52819	0.0381898	Promoter (<=1kb)	0	ENSMUSG00000001804	Dsg4	desmoglein 4
Chr15	55856064	55857063	2.09981	0.0382026	Distal Intergenic	-117560	NA	NA	NA
Chr1	167869660	167871633	-1.73185	0.0382106	Promoter (4-5kb)	-4629	ENSMUSG00000026565	Pou2f1	POU domain, class 2, transcription factor 1
Chr8	58835987	58837727	-1.41924	0.0382254	Distal Intergenic	62638	NA	NA	NA
Chr16	78885263	78886360	-1.7705	0.0382806	Distal Intergenic	-44833	NA	NA	NA
Chr5	147853663	147854765	-1.57066	0.0383083	5' UTR	33383	ENSMUSG00000016520	Lnx2	ligand of numb-protein X 2
Chr10	30715717	30717259	-1.94653	0.0383769	Distal Intergenic	-153128	NA	NA	NA
Chr5	33072502	33073501	1.2977	0.0383769	Distal Intergenic	11381	NA	NA	NA
Chr16	23012102	23013919	-1.7114	0.0384042	Exon (uc007ysx.1/385643, exon 4 of 11)	15255	ENSMUSG00000060459	Kng2	kininogen 2
Chr7	71328093	71329173	-1.65197	0.0384071	Promoter (1-2kb)	-1172	ENSMUSG00000030523	Trpm1	transient receptor potential cation channel, subfamily M, member 1
Chr2	147349450	147350794	-1.74895	0.0384606	Distal Intergenic	155432	NA	NA	NA
Chr9	61214140	61215139	2.06366	0.0384785	Promoter (5-6kb)	-5034	ENSMUSG00000032280	Tle3	transducin-like enhancer of split 3
Chr13	25771728	25773331	-1.57559	0.0384825	Distal Intergenic	-409863	NA	NA	NA
ChrX	147576036	147577035	1.93231	0.0384914	Distal Intergenic	-44950	NA	NA	NA
Chr7	108665409	108666408	2.12563	0.0385088	Distal Intergenic	41519	NA	NA	NA
Chr8	34186400	34187399	2.06045	0.0385349	Distal Intergenic	-125902	NA	NA	NA
Chr7	146610595	146611594	-1.61202	0.0386691	Exon (uc009kft.1/uc009kft.1, exon 1 of 1)	24167	ENSMUSG00000025477	Inpp5a	inositol polyphosphate-5-phosphatase A
Chr14	89284189	89285192	-1.87303	0.038673	Distal Intergenic	-412986	NA	NA	NA
Chr13	51590946	51591945	1.63267	0.038676	Intron (uc007qmg.1/20418, intron 2 of 11)	70508	ENSMUSG00000021448	Shc3	src homology 2 domain-containing transforming protein C3
Chr14	76613878	76615038	-1.3809	0.0386835	Distal Intergenic	103180	NA	NA	NA
Chr13	61051059	61052058	1.66748	0.0386915	Promoter (7-8kb)	-7763	ENSMUSG00000033834	Tpbpa	trophoblast specific protein alpha
Chr5	102406275	102407274	2.06557	0.0387207	Intron (uc008yis.2/72145, intron 4 of 66)	91666	ENSMUSG00000043940	Wdfy3	WD repeat and FYVE domain containing 3
Chr3	141207256	141208585	-1.75636	0.0387219	Intron (uc008roc.1/22253, intron 1 of 1)	78728	ENSMUSG00000059921	Unc5c	unc-5 netrin receptor C
Chr15	75394088	75395312	2.71098	0.0387299	Promoter-(1-2kb)	1766	ENSMUSG00000022577	Ly6h	lymphocyte antigen 6 complex, locus H
Chr15	96810174	96811173	1.54423	0.0387309	Distal Intergenic	39596	NA	NA	NA
Chr7	36725832	36727437	-1.96727	0.0387681	Distal Intergenic	-137824	NA	NA	NA
Chr6	34179038	34180037	1.93478	0.0388168	Distal Intergenic	-51984	NA	NA	NA
Chr13	92049694	92051655	-1.46414	0.0388357	Intron (uc007rke.2/19418, intron 15 of 23)	-33204	ENSMUSG00000021622	Ckmt2	creatine kinase, mitochondrial 2
Chr13	61876018	61877692	-1.66398	0.038839	Intron (uc007qwn.2/432812, intron 1 of 3)	3078	NA	BC052688	cDNA sequence BC052688
Chr12	103836710	103838501	-1.65225	0.0388401	Intron (uc007ouj.1/217837, intron 4 of 9)	43531	ENSMUSG00000021194	Chga	chromogranin A
Chr4	85967207	85969295	-1.60434	0.0388721	Exon (uc009vcq.2/77739, exon 15 of 28)	44537	ENSMUSG00000066113	Adamtsl1	ADAMTS-like 1
Chr16	87111941	87113822	-1.3946	0.0388855	Distal Intergenic	-240608	NA	NA	NA
Chr17	72516455	72518278	-1.61276	0.0389588	Intron (uc008dnb.1/11682, intron 4 of 28)	-91297	ENSMUSG00000024054	Smchd1	SMC hinge domain containing 1
Chr7	141523598	141524940	1.56647	0.0389849	Intron (uc012fvh.1/71007, intron 3 of 8)	31627	ENSMUSG00000030994	D7Ertd443e	DNA segment, Chr 7, ERATO Doi 443, expressed
Chr15	48501767	48502766	1.90505	0.0389973	Intron (uc007vqu.2/239420, intron 2 of 70)	120769	ENSMUSG00000022311	Csmd3	CUB and Sushi multiple domains 3
Chr14	7900152	7901448	-1.48846	0.0390381	Intron (uc011zfr.1/100038847, intron 2 of 6)	36523	ENSMUSG00000092167	Gm3696	predicted gene 3696
ChrX	40361787	40362786	1.68868	0.0390453	Intron (uc009tbc.1/23963, intron 4 of 32)	265175	ENSMUSG00000016150	Tenm1	teneurin transmembrane protein 1
Chr14	83671848	83672847	2.14383	0.0390483	Distal Intergenic	-1170523	NA	NA	NA
Chr12	63648686	63649685	1.76706	0.0390844	Distal Intergenic	1023067	NA	NA	NA
ChrX	98952903	98953902	1.97815	0.0391325	Distal Intergenic	-23417	NA	NA	NA
Chr5	138395569	138396763	-1.7478	0.0391325	3' UTR	7424	ENSMUSG00000056966	Gjc3	gap junction protein, gamma 3
Chr18	73876685	73878232	-1.45866	0.0391713	Promoter (13-14kb)	-13290	ENSMUSG00000024515	Smad4	SMAD family member 4
Chr17	53252447	53253593	-1.99902	0.0391743	Distal Intergenic	349053	NA	NA	NA
Chr5	46042271	46043270	2.45743	0.0391919	Promoter (11-12kb)	-11531	ENSMUSG00000015879	Fam184b	family with sequence similarity 184, member B
Chr13	45493561	45494636	-1.39851	0.0391999	Intron (uc007qgz.1/218203, intron 2 of 6)	8450	ENSMUSG00000038175	Mylip	myosin regulatory light chain interacting protein
Chr10	32812405	32813748	-1.43236	0.03925	Intron (uc007etz.2/76757, intron 1 of 7)	9116	ENSMUSG00000019787	Trdn	triadin
Chr14	65970900	65972164	-1.52721	0.0392779	Promoter (5-6kb)	-5349	ENSMUSG00000034522	Zfp395	zinc finger protein 395
Chr5	138297236	138298235	2.40272	0.0392881	Promoter (1-2kb)	1042	ENSMUSG00000066684	Pilrb1	paired immunoglobin-like type 2 receptor beta 1
Chr9	11152950	11153949	2.54428	0.039289	Distal Intergenic	-248175	NA	NA	NA
Chr9	35652883	35654185	-1.76385	0.0393099	Promoter (1-2kb)	-1148	ENSMUSG00000047980	Pate5	prostate and testis expressed 5
Chr15	10764966	10766418	-1.46017	0.0393135	Distal Intergenic	-115669	NA	NA	NA
Chr9	8317841	8318966	-1.71441	0.0393538	Distal Intergenic	71055	NA	NA	NA
Chr11	26552278	26553277	2.45328	0.0394446	Distal Intergenic	-58358	NA	NA	NA
Chr1	183070717	183072042	-1.42451	0.039464	Promoter (2-3kb)	2246	ENSMUSG00000026516	Nvl	nuclear VCP-like
Chr6	41313260	41314401	-1.42254	0.0394784	Intron (uc009bnt.1/386551, intron 1 of 2)	9156	ENSMUSG00000071521	Try10	trypsin 10
Chr1	135980676	135981675	2.25214	0.0395168	Promoter (4-5kb)	-4944	ENSMUSG00000020423	Btg2	BTG anti-proliferation factor 2
Chr17	13588814	13589813	1.4564	0.0395378	Distal Intergenic	40632	NA	NA	NA
Chr15	35303204	35304813	-1.62237	0.0395711	Promoter (1-2kb)	1903	ENSMUSG00000037646	Vps13b	vacuolar protein sorting 13B
Chr14	71127813	71128812	1.72475	0.0395722	Promoter (19-20kb)	-19971	ENSMUSG00000022100	Xpo7	exportin 7
Chr11	121805453	121806452	1.87254	0.0396239	Distal Intergenic	113921	NA	NA	NA
[truncated: 393 more rows]
